# Supplementary material for: Combined targeted and epigenetic-based therapy enhances antitumor immunity by stabilizing GATA6-dependent MHCI expression in pancreatic ductal adenocarcinoma
Source: Research Square preprint supplement (doi:10.21203/rs.3.rs-4555029/v1), 2024-06-16
Supplement: Supplementary file 1 [file 6aec4fb6ce53331748409e38.xlsx]

## Sheet: GATA6 TumorCells DEG
p_val	avg_log2FC	pct.1	pct.2	p_val_adj
TMC5	0	1.90945	0.757	0.26	0
CLDN18	3.77014e-298	2.60094	0.565	0.054	1.37991e-293
ONECUT2	1.0729e-282	1.92089	0.558	0.077	3.92692e-278
SLC44A4	3.721e-277	1.4668	0.749	0.295	1.36192e-272
MT2A	2.43565e-272	-3.15518	0.431	0.785	8.91472e-268
ANXA10	1.31981e-268	1.53388	0.53	0.042	4.83065e-264
LYZ	2.3246e-265	1.80834	0.893	0.464	8.50827e-261
ABHD2	1.49779e-231	1.22879	0.748	0.328	5.48207e-227
SPINK1	2.65583e-224	3.13624	0.587	0.162	9.72061e-220
TMSB4X	2.21322e-223	-1.04168	0.953	0.963	8.10059e-219
PIGR	1.16816e-220	2.04026	0.46	0.041	4.27557e-216
MMP1	2.47034e-220	1.91496	0.563	0.125	9.04167e-216
TFPI	3.43428e-218	1.06384	0.567	0.137	1.25698e-213
TCIM	1.65264e-214	1.46306	0.437	0.034	6.04883e-210
SERPINA3	2.76043e-212	2.75472	0.467	0.063	1.01034e-207
CD24	3.15972e-212	1.23114	0.862	0.426	1.15649e-207
SPTBN1	1.61554e-201	1.19273	0.807	0.396	5.91303e-197
LGALS4	5.63407e-201	1.29634	0.76	0.332	2.06212e-196
CYSTM1	3.31935e-198	1.14007	0.792	0.41	1.21492e-193
ANXA4	5.42873e-198	1.14604	0.829	0.409	1.98697e-193
SERPINA1	1.50096e-195	2.65905	0.768	0.425	5.49368e-191
TRIM54	2.89938e-191	1.03076	0.44	0.072	1.0612e-186
S100A11	3.30036e-189	-0.874918	0.949	0.956	1.20796e-184
IGFBP7	3.5737e-188	-2.05466	0.425	0.74	1.30801e-183
GOLM1	5.48368e-187	1.01704	0.734	0.349	2.00708e-182
ADAM9	1.99159e-186	1.3191	0.637	0.266	7.28942e-182
VMP1	1.02018e-185	1.02711	0.76	0.361	3.73395e-181
CYP3A5	5.0155e-183	1.25068	0.703	0.311	1.83572e-178
IGKC	2.09117e-180	-3.4756	0.385	0.686	7.65389e-176
GOLGA4	3.46777e-180	0.939715	0.72	0.336	1.26924e-175
GPX2	6.35168e-178	1.32585	0.633	0.226	2.32478e-173
CCL20	1.27677e-177	2.15111	0.492	0.109	4.67311e-173
MTRNR2L12	6.90545e-177	-4.57261	0.145	0.443	2.52746e-172
ERBB3	1.14841e-176	1.09169	0.675	0.301	4.20331e-172
MGP	1.61183e-175	-2.36735	0.191	0.524	5.89947e-171
NEAT1	4.00411e-174	1.12542	0.92	0.639	1.46554e-169
NFKBIZ	9.89626e-174	0.836515	0.584	0.203	3.62213e-169
MUC3A	1.7441e-173	1.31589	0.44	0.087	6.38358e-169
CDHR2	4.75865e-171	0.911638	0.341	0.013	1.74171e-166
TMEM45B	2.13539e-170	0.54244	0.453	0.094	7.81575e-166
S100A10	1.41349e-169	-0.787654	0.89	0.927	5.17353e-165
MALAT1	3.28886e-169	1.65784	0.982	0.972	1.20375e-164
SHROOM3	1.22319e-168	0.879972	0.621	0.262	4.47699e-164
RAB11FIP1	2.763e-164	1.34226	0.693	0.337	1.01129e-159
TCF25	3.00965e-164	0.78717	0.706	0.341	1.10156e-159
DUOX2	9.46759e-164	1.7009	0.4	0.065	3.46523e-159
JPT1	4.70439e-163	0.874604	0.715	0.366	1.72185e-158
RPLP1	5.28317e-163	-0.765328	0.963	0.968	1.93369e-158
TSPAN8	5.68905e-162	1.06785	0.683	0.303	2.08225e-157
TFF2	3.66997e-161	2.52995	0.583	0.238	1.34325e-156
MYO15B	2.66824e-160	0.716988	0.405	0.063	9.76601e-156
DST	9.1386e-160	0.909754	0.766	0.357	3.34482e-155
SULT1C2	1.4274e-159	1.06425	0.395	0.056	5.22441e-155
SLC3A1	1.50203e-159	1.07405	0.315	0.009	5.49757e-155
MGLL	3.75651e-159	0.750125	0.647	0.288	1.37492e-154
RRBP1	9.08267e-158	0.94672	0.758	0.358	3.32435e-153
SCTR	6.63812e-156	0.938505	0.322	0.016	2.42962e-151
AK4	5.24803e-155	0.56408	0.406	0.076	1.92083e-150
NCOA7	1.8453e-154	0.933528	0.617	0.263	6.754e-150
FAM135A	6.0984e-153	0.791259	0.468	0.128	2.23208e-148
MYO6	2.12441e-150	0.823821	0.698	0.326	7.77557e-146
SLC40A1	2.96307e-150	0.945557	0.657	0.29	1.08451e-145
GCNT3	3.2958e-149	0.698351	0.506	0.156	1.2063e-144
PRR13	7.84607e-149	0.558442	0.652	0.315	2.87174e-144
RPS4X	4.49361e-148	-0.911289	0.873	0.849	1.6447e-143
CCDC47	9.1481e-148	0.664569	0.598	0.264	3.3483e-143
CCDC198	1.88699e-147	0.532092	0.315	0.02	6.90657e-143
ETNK1	1.90753e-147	0.706758	0.596	0.266	6.98175e-143
WDR45B	3.3149e-147	0.649695	0.567	0.231	1.21329e-142
OLFM4	6.83888e-147	2.4857	0.594	0.227	2.5031e-142
BNIP5	1.15795e-146	1.13896	0.329	0.029	4.23821e-142
PFKFB3	2.18574e-145	0.788778	0.44	0.108	8.00004e-141
ERO1A	2.71815e-145	1.04347	0.681	0.342	9.94871e-141
CES2	8.35728e-145	0.91421	0.443	0.122	3.05885e-140
CLU	1.17986e-144	0.998431	0.488	0.134	4.31842e-140
EIF4A2	1.54006e-144	0.689624	0.773	0.434	5.63677e-140
GOLGB1	2.29471e-143	0.865463	0.751	0.366	8.39888e-139
POLD4	7.85401e-143	0.54898	0.641	0.312	2.87465e-138
PTPRK	3.10542e-142	0.73569	0.555	0.234	1.13661e-137
CA2	4.99947e-142	0.864217	0.35	0.05	1.82985e-137
DDIT3	1.44653e-141	0.622633	0.473	0.13	5.29443e-137
TM4SF5	3.51132e-141	0.470804	0.417	0.1	1.28518e-136
RNF213	9.82055e-141	0.855454	0.676	0.311	3.59442e-136
VEGFA	1.79722e-140	0.805704	0.657	0.287	6.57801e-136
BIRC3	6.20077e-139	1.20772	0.572	0.239	2.26954e-134
TNFAIP2	8.26118e-139	0.904223	0.525	0.187	3.02367e-134
TSPAN3	2.96807e-137	0.650181	0.742	0.386	1.08634e-132
RESF1	1.74935e-135	0.930969	0.581	0.252	6.40279e-131
PDZK1IP1	5.24135e-135	0.984656	0.582	0.245	1.91839e-130
TRAM1	5.3583e-135	0.672724	0.684	0.35	1.96119e-130
CMBL	6.90731e-135	0.728043	0.461	0.149	2.52814e-130
CCNL1	7.87945e-135	0.731809	0.699	0.345	2.88396e-130
IBTK	2.2374e-134	0.504114	0.507	0.186	8.18911e-130
LIMA1	4.27727e-134	0.731068	0.644	0.315	1.56552e-129
TPD52	4.80338e-134	0.60072	0.595	0.27	1.75809e-129
AKAP9	5.99292e-134	0.739128	0.706	0.359	2.19347e-129
ARHGEF12	8.43157e-134	0.643468	0.591	0.266	3.08604e-129
STAT3	1.13198e-133	0.584984	0.65	0.314	4.14315e-129
CXCL5	1.79599e-132	1.51375	0.365	0.065	6.57352e-128
PA2G4	1.82429e-132	0.820247	0.64	0.306	6.6771e-128
PNISR	1.92916e-132	0.669883	0.627	0.295	7.06092e-128
TRNP1	2.79249e-132	0.344385	0.394	0.081	1.02208e-127
SEC31A	3.00659e-132	0.512723	0.662	0.323	1.10044e-127
TC2N	4.64562e-132	0.603038	0.559	0.232	1.70034e-127
KTN1	1.04479e-131	0.704185	0.77	0.39	3.82405e-127
NDRG1	1.67194e-131	1.00452	0.606	0.276	6.11946e-127
ST3GAL1	4.32445e-131	0.751174	0.556	0.239	1.58279e-126
TAF1D	6.94569e-130	0.652931	0.657	0.336	2.54219e-125
EPS8L2	1.27194e-129	0.537801	0.57	0.249	4.65544e-125
GALNT4	1.87802e-129	0.940889	0.471	0.175	6.87375e-125
ASL	6.85205e-129	0.642086	0.564	0.243	2.50792e-124
GATA6	2.72749e-128	0.441371	0.424	0.108	9.98287e-124
MECOM	4.10141e-128	0.894329	0.51	0.208	1.50116e-123
CDHR5	2.32455e-127	0.44941	0.349	0.06	8.5081e-123
CFTR	9.235e-127	1.01467	0.316	0.041	3.3801e-122
TM4SF4	1.87603e-126	1.62365	0.338	0.06	6.86647e-122
RAD21	1.94009e-126	0.769841	0.631	0.318	7.10094e-122
LRP10	6.00276e-126	0.503467	0.69	0.36	2.19707e-121
CTNND1	8.15346e-126	0.571487	0.685	0.345	2.98425e-121
KMT2E	1.34019e-125	0.566066	0.636	0.327	4.90522e-121
KLF6	1.45022e-125	0.767753	0.798	0.438	5.30795e-121
LGALS3BP	1.59743e-125	0.699393	0.779	0.429	5.84674e-121
CLCN3	6.79445e-125	0.526752	0.551	0.244	2.48684e-120
BSG	1.2058e-124	0.429802	0.744	0.413	4.41333e-120
RBM47	6.21977e-124	0.553334	0.585	0.275	2.2765e-119
ASPH	9.83814e-124	0.564685	0.69	0.332	3.60086e-119
SOD2	4.20366e-123	0.579107	0.751	0.408	1.53858e-118
CFB	4.33882e-123	0.808835	0.593	0.267	1.58805e-118
KLK11	2.29695e-122	0.466549	0.472	0.158	8.40707e-118
ATP1B1	5.60134e-122	0.887482	0.811	0.456	2.05015e-117
RIOK3	8.02016e-122	0.7594	0.669	0.345	2.93546e-117
HS3ST1	1.26283e-121	0.672485	0.444	0.148	4.62207e-117
ACOX1	1.30698e-121	0.580174	0.48	0.181	4.78368e-117
SH3RF1	1.88794e-120	0.493548	0.523	0.214	6.91005e-116
SLC22A18	5.12435e-120	0.490154	0.482	0.175	1.87556e-115
C6orf141	5.73653e-120	0.619837	0.345	0.067	2.09963e-115
SYNE2	8.24763e-120	0.965474	0.754	0.383	3.01871e-115
CCDC88A	8.79558e-120	0.569633	0.44	0.139	3.21927e-115
APP	1.08503e-119	0.47034	0.677	0.351	3.97132e-115
TFF3	1.16579e-119	1.91283	0.504	0.182	4.26692e-115
FGD4	3.04019e-119	0.715862	0.511	0.214	1.11274e-114
GAA	4.77085e-119	0.207782	0.351	0.066	1.74618e-114
GCC2	5.45566e-119	0.581197	0.693	0.355	1.99683e-114
SON	2.78085e-118	0.670474	0.75	0.399	1.01782e-113
RNF128	6.66548e-118	0.483331	0.457	0.155	2.43963e-113
PCMTD1	3.09207e-117	0.478406	0.584	0.275	1.13173e-112
TGOLN2	5.40729e-117	0.563002	0.696	0.366	1.97912e-112
SCAF11	1.30784e-116	0.514034	0.662	0.332	4.78684e-112
SEL1L3	7.2723e-116	0.374218	0.522	0.212	2.66173e-111
ANKRD11	3.13498e-115	0.704569	0.665	0.324	1.14743e-110
RPL7L1	6.69048e-115	0.575602	0.567	0.26	2.44878e-110
LIPH	9.62779e-115	0.669063	0.56	0.254	3.52387e-110
CGN	3.18106e-114	0.466555	0.591	0.265	1.1643e-109
HADHA	1.03416e-113	0.344776	0.576	0.281	3.78513e-109
CLINT1	1.35486e-113	0.571347	0.645	0.312	4.95892e-109
CDH1	1.59229e-113	0.514103	0.664	0.346	5.82795e-109
BAZ2B	3.11093e-113	0.568231	0.56	0.245	1.13863e-108
EIF5B	9.13635e-113	0.55388	0.694	0.351	3.34399e-108
FNDC3B	1.09789e-112	0.382579	0.638	0.316	4.0184e-108
EFNA2	1.3491e-112	0.364297	0.282	0.034	4.93784e-108
PLD1	1.52582e-112	0.506518	0.361	0.088	5.58465e-108
FAM13A	1.5882e-112	0.526309	0.39	0.11	5.81298e-108
SF3B2	1.0077e-111	0.482665	0.619	0.307	3.68828e-107
CSNK1D	1.08871e-111	0.469552	0.536	0.233	3.98478e-107
ZNF292	1.37778e-111	0.820313	0.593	0.287	5.0428e-107
CPD	1.50133e-111	0.553537	0.594	0.283	5.49501e-107
ADD3	1.65427e-111	0.523324	0.624	0.31	6.0548e-107
SMIM24	4.46882e-111	0.690959	0.401	0.114	1.63563e-106
SDC4	1.21334e-110	0.564615	0.767	0.45	4.44096e-106
SMARCC2	1.36106e-110	0.660899	0.51	0.212	4.98163e-106
NSD3	1.68213e-110	0.417093	0.587	0.292	6.15676e-106
TLN1	2.91525e-110	1.11112	0.611	0.307	1.06701e-105
TRAK1	6.59073e-110	0.577161	0.507	0.223	2.41227e-105
PCSK5	6.61242e-110	0.326696	0.282	0.035	2.42021e-105
WSB1	6.89177e-110	0.472816	0.624	0.304	2.52246e-105
RSF1	8.09655e-110	0.52622	0.6	0.299	2.96342e-105
GABRP	8.18177e-110	0.732427	0.25	0.017	2.99461e-105
CHD9	8.84747e-110	0.538205	0.568	0.268	3.23826e-105
EGLN3	1.34909e-109	0.795468	0.388	0.114	4.93779e-105
LGR6	3.34998e-109	-0.399349	0.021	0.197	1.22613e-104
CMPK1	5.52847e-109	0.464144	0.672	0.352	2.02347e-104
UPF2	2.74719e-108	0.700931	0.524	0.225	1.0055e-103
SEC63	4.53169e-108	0.490755	0.535	0.246	1.65864e-103
RNF19A	4.55081e-108	0.558471	0.599	0.295	1.66564e-103
GALNT3	5.27897e-108	0.539219	0.619	0.314	1.93216e-103
RPS19	7.40704e-108	-0.611025	0.958	0.943	2.71105e-103
SLC17A9	1.08591e-107	0.194966	0.31	0.052	3.97452e-103
TAF7	1.54729e-107	0.470247	0.628	0.319	5.66322e-103
APLP2	2.55324e-107	0.588332	0.797	0.44	9.3451e-103
STARD10	5.35549e-107	0.680641	0.571	0.274	1.96016e-102
GFPT1	1.1398e-106	0.405944	0.601	0.303	4.17179e-102
KANSL1	2.49128e-106	0.336728	0.543	0.237	9.11833e-102
AFDN	2.60259e-106	0.55808	0.593	0.282	9.52573e-102
DCN	6.95615e-106	-1.95074	0.248	0.493	2.54602e-101
CD2AP	8.06596e-106	0.492552	0.675	0.352	2.95222e-101
LLGL2	9.3721e-106	0.5887	0.598	0.296	3.43028e-101
OPTN	1.20725e-105	0.449243	0.569	0.264	4.41866e-101
GPRC5B	2.22325e-105	0.426032	0.29	0.045	8.13731e-101
PTPRR	2.62062e-105	0.439199	0.271	0.035	9.59173e-101
HOOK2	3.53129e-105	0.623953	0.522	0.234	1.29249e-100
ARHGDIA	8.14736e-105	0.303556	0.624	0.331	2.98201e-100
FAM102A	1.22014e-104	0.564164	0.544	0.255	4.46585e-100
VNN1	1.24384e-104	0.474383	0.25	0.023	4.55259e-100
SEPTIN9	1.44064e-104	0.404474	0.609	0.313	5.27288e-100
MSI2	1.46331e-104	0.460231	0.51	0.227	5.35585e-100
AHNAK	2.04459e-104	0.635881	0.809	0.476	7.4834e-100
SLC4A4	6.91515e-104	0.624279	0.295	0.049	2.53101e-99
AFF4	7.93328e-104	0.488722	0.601	0.3	2.90366e-99
TRIM15	1.17468e-103	0.418882	0.311	0.062	4.29945e-99
CLTC	1.83256e-103	0.368526	0.638	0.336	6.70735e-99
DNAJC10	2.53337e-103	0.560059	0.59	0.285	9.27237e-99
CLTA	4.90843e-103	0.852729	0.74	0.426	1.79653e-98
PHF3	6.83892e-103	0.491984	0.589	0.289	2.50311e-98
HDLBP	1.23512e-102	0.349137	0.737	0.404	4.52067e-98
CREB3	2.00834e-102	0.953184	0.498	0.215	7.35073e-98
PLSCR1	2.07965e-102	0.505959	0.62	0.309	7.61171e-98
BBX	5.3878e-102	0.47201	0.565	0.282	1.97199e-97
SNHG32	7.01493e-102	0.457813	0.592	0.299	2.56754e-97
PRKAR1A	9.55572e-102	0.295292	0.566	0.28	3.49749e-97
SYT13	2.34591e-101	0.560469	0.426	0.155	8.58626e-97
LPP	2.62458e-101	0.387807	0.627	0.32	9.60624e-97
RRAS	2.90204e-101	0.333505	0.598	0.307	1.06217e-96
SRD5A3	3.39286e-101	0.745509	0.477	0.201	1.24182e-96
ABCF1	3.60025e-101	0.509711	0.595	0.297	1.31773e-96
ADAM28	6.56565e-101	0.67935	0.429	0.161	2.40309e-96
PIK3C2G	8.28576e-101	0.428084	0.208	0.003	3.03267e-96
CD164	1.47301e-100	0.478778	0.705	0.388	5.39135e-96
SLC9A3R1	2.16121e-100	0.512213	0.482	0.214	7.91025e-96
LRRFIP1	3.21996e-100	0.530346	0.766	0.445	1.17854e-95
P4HB	3.77746e-100	0.399329	0.753	0.428	1.38259e-95
TNIP1	4.35689e-100	0.508491	0.543	0.255	1.59467e-95
ZKSCAN1	6.28864e-100	0.554683	0.587	0.295	2.30171e-95
MRPL23	7.24927e-100	0.175515	0.398	0.123	2.65331e-95
DYNC1I2	8.11069e-100	0.399363	0.67	0.339	2.9686e-95
USP53	8.66548e-100	0.433248	0.54	0.242	3.17165e-95
KCNE3	8.81843e-100	0.519533	0.297	0.058	3.22763e-95
SLC38A1	8.96675e-100	0.39872	0.534	0.246	3.28192e-95
TRIM56	1.56768e-99	0.483187	0.539	0.248	5.73786e-95
CHMP2B	1.74829e-99	0.413045	0.545	0.267	6.39893e-95
ERV3-1	2.3772e-99	0.625632	0.327	0.079	8.70081e-95
XBP1	2.97759e-99	0.259406	0.617	0.305	1.08983e-94
EPB41L2	3.38351e-99	0.290703	0.313	0.064	1.2384e-94
RNH1	5.56701e-99	0.109496	0.597	0.317	2.03758e-94
VDAC1	7.35304e-99	0.471896	0.713	0.401	2.69129e-94
ZMYND8	9.46269e-99	0.475501	0.51	0.234	3.46344e-94
ASCC3	1.22847e-98	0.48924	0.443	0.173	4.49632e-94
STX7	1.57602e-98	0.31826	0.448	0.172	5.76839e-94
PDLIM5	4.37409e-98	0.276848	0.586	0.3	1.60096e-93
NKTR	5.37086e-98	0.522562	0.586	0.284	1.96579e-93
IYD	7.60874e-98	0.438065	0.256	0.034	2.78487e-93
HIST1H4C	7.86648e-98	0.574692	0.573	0.28	2.87921e-93
ZBTB10	1.88844e-97	0.34738	0.362	0.105	6.91187e-93
PGC	3.08871e-97	1.05568	0.248	0.027	1.1305e-92
ESCO1	3.54303e-97	0.558837	0.467	0.197	1.29678e-92
AKR7A3	6.82605e-97	0.471004	0.363	0.106	2.4984e-92
ATP6V0A1	1.57152e-96	0.495533	0.46	0.19	5.75193e-92
YME1L1	2.0682e-96	0.337022	0.575	0.287	7.56982e-92
MYEOV	2.09683e-96	0.302938	0.362	0.096	7.6746e-92
FAM3D	2.12132e-96	0.579673	0.331	0.08	7.76425e-92
AHR	2.29678e-96	0.503344	0.642	0.349	8.40646e-92
CYP2S1	2.53115e-96	0.379942	0.367	0.116	9.26427e-92
EPS8L3	2.5379e-96	0.470949	0.467	0.197	9.28895e-92
RAMP1	4.46959e-96	0.391349	0.423	0.155	1.63591e-91
ANG	5.79424e-96	0.311466	0.394	0.131	2.12075e-91
CEMIP2	6.09657e-96	0.447935	0.556	0.275	2.23141e-91
GNL3	8.99443e-96	0.349172	0.513	0.249	3.29205e-91
SERPINA4	9.48143e-96	0.645515	0.298	0.064	3.4703e-91
RNPEPL1	1.098e-95	0.404561	0.548	0.273	4.01877e-91
SQSTM1	1.1758e-95	0.523043	0.801	0.491	4.30356e-91
OSBPL1A	1.39386e-95	0.541894	0.459	0.196	5.10167e-91
HNF4A	1.58392e-95	0.294186	0.365	0.112	5.79732e-91
RASEF	1.88556e-95	0.552197	0.507	0.223	6.90134e-91
STAU1	2.53407e-95	0.383748	0.603	0.324	9.27495e-91
BPTF	2.67638e-95	0.517556	0.597	0.301	9.79584e-91
EIF4G2	3.55702e-95	0.304054	0.761	0.455	1.30191e-90
RB1CC1	4.11508e-95	0.370117	0.57	0.276	1.50616e-90
PNN	4.40261e-95	0.473209	0.626	0.316	1.6114e-90
SLC19A3	4.80576e-95	0.52054	0.217	0.014	1.75896e-90
VILL	5.10518e-95	0.313393	0.441	0.174	1.86855e-90
NUMA1	6.76602e-95	0.397335	0.575	0.287	2.47643e-90
MAP4	1.39099e-94	0.270573	0.556	0.276	5.09115e-90
AC023157.3	1.49147e-94	0.601152	0.255	0.036	5.45894e-90
CHMP4C	2.42086e-94	0.406387	0.496	0.233	8.8606e-90
PRRC2A	2.48672e-94	0.426856	0.539	0.262	9.10163e-90
MYH14	4.70965e-94	0.365006	0.639	0.323	1.72378e-89
CHD2	6.19007e-94	0.467978	0.58	0.293	2.26563e-89
TCF7L2	7.75515e-94	0.416662	0.58	0.3	2.83846e-89
COBLL1	1.15015e-93	0.366662	0.435	0.165	4.20966e-89
EIF4G1	1.42172e-93	0.342609	0.642	0.328	5.20364e-89
ARID1B	1.47129e-93	0.401171	0.582	0.287	5.38508e-89
TMEM37	1.65934e-93	0.422853	0.321	0.08	6.07336e-89
CDK12	1.86433e-93	0.45173	0.52	0.244	6.82362e-89
SAV1	2.17585e-93	0.711084	0.495	0.236	7.96382e-89
SEC61A1	2.62697e-93	0.355995	0.605	0.313	9.61496e-89
YIPF3	2.70358e-93	0.413729	0.608	0.322	9.89536e-89
PKP3	2.73252e-93	0.331366	0.549	0.283	1.00013e-88
ATXN7L3B	2.9313e-93	0.446615	0.496	0.228	1.07289e-88
NBR1	4.25694e-93	0.328384	0.523	0.247	1.55808e-88
OS9	4.28586e-93	0.410139	0.564	0.285	1.56867e-88
YIPF4	4.35678e-93	0.242952	0.529	0.252	1.59463e-88
PTPRH	4.48875e-93	0.282554	0.317	0.077	1.64293e-88
OCIAD1	4.70473e-93	0.20276	0.6	0.315	1.72198e-88
AIMP1	5.18693e-93	0.373323	0.546	0.274	1.89847e-88
ATRX	6.05491e-93	0.51267	0.661	0.343	2.21616e-88
SNX9	6.09229e-93	0.369119	0.496	0.222	2.22984e-88
MRPS23	1.10182e-92	0.23479	0.417	0.154	4.03279e-88
GRN	1.17466e-92	0.345083	0.738	0.418	4.29937e-88
STAT6	1.64077e-92	0.472263	0.511	0.242	6.00539e-88
C11orf58	2.88653e-92	0.318717	0.669	0.375	1.0565e-87
FOXO3	5.49326e-92	0.460587	0.517	0.241	2.01059e-87
GDF15	9.81197e-92	0.671273	0.405	0.135	3.59128e-87
DHRS7	1.31163e-91	0.346868	0.567	0.291	4.80069e-87
FUCA2	1.39085e-91	0.303086	0.433	0.179	5.09067e-87
NDUFS7	1.46978e-91	0.264576	0.539	0.26	5.37954e-87
TJP2	1.68882e-91	0.555031	0.556	0.28	6.18125e-87
NOSTRIN	2.13002e-91	0.355009	0.299	0.068	7.79607e-87
ACHE	2.54268e-91	0.517998	0.225	0.022	9.30646e-87
TFG	2.72129e-91	0.286528	0.555	0.287	9.96018e-87
MARCKS	2.75082e-91	0.276667	0.672	0.349	1.00683e-86
SEC62	5.68659e-91	0.425831	0.665	0.379	2.08135e-86
SEZ6L2	5.87004e-91	0.460038	0.532	0.259	2.14849e-86
MAP4K4	7.5193e-91	0.43507	0.607	0.304	2.75214e-86
EREG	7.59119e-91	0.669188	0.335	0.092	2.77845e-86
STK39	7.78376e-91	0.442251	0.461	0.203	2.84893e-86
AHNAK2	8.66997e-91	1.06914	0.632	0.341	3.1733e-86
PDAP1	9.08894e-91	0.371862	0.594	0.321	3.32664e-86
LY6D	1.02025e-90	-2.37161	0.129	0.331	3.73422e-86
SGPP2	1.30991e-90	0.455446	0.536	0.254	4.79441e-86
HBEGF	1.57732e-90	0.55299	0.401	0.145	5.77314e-86
ADGRG6	1.64016e-90	0.385079	0.381	0.131	6.00313e-86
AL627171.2	1.81416e-90	0.419678	0.538	0.242	6.64001e-86
FGFR4	2.06009e-90	0.307231	0.262	0.043	7.54013e-86
SEPHS2	2.52965e-90	0.488239	0.522	0.252	9.25876e-86
NAMPT	3.87297e-90	0.425122	0.676	0.366	1.41754e-85
TESC	3.89616e-90	0.344299	0.578	0.283	1.42604e-85
HSD17B11	4.31976e-90	0.324609	0.532	0.271	1.58108e-85
CTNNA1	5.16051e-90	0.339269	0.7	0.374	1.8888e-85
FAHD1	5.33109e-90	0.296345	0.345	0.103	1.95123e-85
CCNL2	6.33228e-90	0.47154	0.485	0.213	2.31768e-85
BAZ2A	6.6656e-90	0.334763	0.492	0.228	2.43968e-85
LARP1B	7.47857e-90	0.339273	0.401	0.148	2.73723e-85
SPATS2L	8.74568e-90	0.323788	0.689	0.374	3.20101e-85
TST	9.28698e-90	0.363964	0.441	0.187	3.39913e-85
ITGB6	1.18422e-89	0.567441	0.644	0.333	4.33437e-85
BRD4	1.28671e-89	0.504535	0.587	0.305	4.70948e-85
HSP90B1	1.33266e-89	0.421151	0.802	0.47	4.87765e-85
POR	1.63825e-89	0.274707	0.52	0.254	5.99618e-85
SINHCAF	2.11815e-89	0.482399	0.481	0.234	7.75264e-85
AHCYL2	2.55408e-89	0.460487	0.359	0.12	9.34817e-85
HSD17B2	3.57179e-89	0.440213	0.357	0.115	1.30731e-84
SGMS2	4.86914e-89	0.351113	0.482	0.224	1.78215e-84
RPL37	5.51362e-89	-0.567413	0.929	0.924	2.01804e-84
KIAA0319L	6.04924e-89	0.454714	0.426	0.172	2.21408e-84
DUOXA2	6.24939e-89	0.960253	0.201	0.011	2.28734e-84
JMJD1C	6.58442e-89	0.542412	0.624	0.331	2.40996e-84
BAIAP2L1	9.67288e-89	0.38401	0.551	0.288	3.54037e-84
HECTD1	1.02e-88	0.430987	0.573	0.284	3.7333e-84
TACC1	1.10131e-88	0.518436	0.501	0.247	4.0309e-84
RPN2	1.10502e-88	0.346289	0.645	0.361	4.04449e-84
ASPHD1	1.10783e-88	0.280944	0.42	0.164	4.05476e-84
YTHDC1	1.49604e-88	0.373779	0.564	0.279	5.47566e-84
EIF2A	1.61876e-88	0.287668	0.546	0.277	5.92483e-84
BICD1	4.44733e-88	0.419948	0.36	0.12	1.62777e-83
CGGBP1	4.74977e-88	0.28027	0.503	0.234	1.73846e-83
RNASE4	4.93048e-88	0.263625	0.468	0.201	1.80461e-83
TAOK3	6.04151e-88	0.409066	0.527	0.255	2.21125e-83
CCNC	6.44375e-88	0.157668	0.454	0.196	2.35848e-83
AHI1	6.94445e-88	0.711086	0.443	0.189	2.54174e-83
RNF103	7.42938e-88	0.399743	0.445	0.193	2.71923e-83
VEZF1	8.55056e-88	0.346067	0.424	0.17	3.12959e-83
TAOK1	8.92395e-88	0.341864	0.535	0.272	3.26625e-83
ZNHIT1	9.75074e-88	0.308796	0.643	0.365	3.56887e-83
AGFG1	1.08232e-87	0.266379	0.52	0.248	3.96139e-83
SRRM2	2.00124e-87	0.566276	0.76	0.4	7.32472e-83
TMF1	2.46983e-87	0.367842	0.524	0.264	9.03984e-83
FAM133B	3.06204e-87	0.405549	0.583	0.3	1.12074e-82
GRB2	3.36516e-87	0.323882	0.499	0.235	1.23168e-82
USP47	3.69195e-87	0.275905	0.47	0.208	1.35129e-82
TRIM44	4.51978e-87	0.513325	0.579	0.288	1.65428e-82
INPP4B	5.77355e-87	0.583933	0.529	0.259	2.11318e-82
SUPT4H1	5.94662e-87	0.218473	0.439	0.182	2.17652e-82
CFDP1	7.05523e-87	0.415333	0.608	0.321	2.58229e-82
NUMB	7.9945e-87	0.406623	0.508	0.241	2.92607e-82
B4GALT4	9.83236e-87	0.366284	0.474	0.217	3.59874e-82
GULP1	2.13845e-86	0.391928	0.341	0.101	7.82693e-82
SLC41A2	2.44174e-86	0.359531	0.344	0.108	8.93703e-82
IGF2BP2	2.5756e-86	0.404754	0.513	0.259	9.42695e-82
CAPN5	3.22343e-86	0.38332	0.429	0.181	1.17981e-81
FHL2	3.30245e-86	0.238573	0.532	0.263	1.20873e-81
COTL1	4.27689e-86	0.0803475	0.517	0.235	1.56538e-81
MTUS1	5.57635e-86	0.453674	0.489	0.228	2.041e-81
C12orf75	7.51924e-86	0.18348	0.563	0.267	2.75212e-81
DDX39B	8.22056e-86	0.335122	0.627	0.334	3.00881e-81
ARHGEF5	8.3887e-86	0.465543	0.472	0.218	3.07035e-81
LDLR	8.67425e-86	0.533589	0.606	0.315	3.17486e-81
JAK1	1.17824e-85	0.42243	0.62	0.324	4.31246e-81
IRF3	1.31842e-85	0.404269	0.538	0.268	4.82555e-81
EML4	2.13617e-85	0.360095	0.541	0.273	7.81859e-81
BACE2	2.4265e-85	0.419391	0.599	0.324	8.88125e-81
UGDH	2.79205e-85	0.193335	0.439	0.185	1.02192e-80
SOX9	2.85601e-85	0.558205	0.552	0.275	1.04533e-80
MYRF	3.27694e-85	0.376661	0.481	0.214	1.19939e-80
MAP7	3.44708e-85	0.492948	0.48	0.22	1.26166e-80
DDX18	3.89836e-85	0.365518	0.614	0.335	1.42684e-80
FNBP1L	4.26844e-85	0.38596	0.529	0.26	1.56229e-80
ACIN1	5.01485e-85	0.570895	0.552	0.274	1.83548e-80
PATJ	5.20565e-85	0.523952	0.529	0.256	1.90532e-80
TTC3	5.28478e-85	0.453529	0.634	0.329	1.93428e-80
PLEKHB2	5.32841e-85	0.224953	0.528	0.258	1.95025e-80
FUS	5.62562e-85	0.422643	0.722	0.4	2.05903e-80
SENP6	6.86745e-85	0.338865	0.515	0.246	2.51356e-80
NPNT	7.30712e-85	0.40112	0.405	0.156	2.67448e-80
TLCD2	7.60587e-85	0.318107	0.272	0.057	2.78383e-80
GBA2	8.81753e-85	0.641598	0.315	0.091	3.2273e-80
TCP1	1.05923e-84	0.185761	0.551	0.287	3.8769e-80
BOD1L1	1.30116e-84	0.463712	0.587	0.292	4.76236e-80
DDX42	1.36016e-84	0.378553	0.52	0.258	4.97832e-80
IPO7	1.44433e-84	0.27618	0.513	0.263	5.28638e-80
TATDN1	1.49834e-84	0.35476	0.47	0.225	5.48407e-80
BCLAF1	1.8384e-84	0.386798	0.609	0.324	6.72874e-80
PPP2R1A	2.13793e-84	0.264995	0.569	0.303	7.82502e-80
RAB7A	2.69648e-84	0.176261	0.603	0.331	9.86938e-80
PLS1	4.41281e-84	0.485979	0.536	0.276	1.61513e-79
MISP	4.4987e-84	0.316272	0.509	0.243	1.64657e-79
TAX1BP1	4.59097e-84	0.417592	0.677	0.371	1.68034e-79
RASSF7	4.6115e-84	0.259459	0.53	0.263	1.68785e-79
MAP2K3	6.47919e-84	0.0901632	0.46	0.202	2.37145e-79
SDCBP	6.93233e-84	0.189808	0.694	0.399	2.5373e-79
PON2	7.10029e-84	0.313185	0.594	0.317	2.59878e-79
CFLAR	7.7077e-84	0.330016	0.628	0.334	2.82109e-79
CAPN8	8.8947e-84	0.432094	0.533	0.248	3.25555e-79
SLC9B2	1.0133e-83	0.308966	0.358	0.117	3.70878e-79
LMO4	1.01413e-83	0.522924	0.579	0.305	3.71181e-79
SPTAN1	1.03123e-83	0.339907	0.612	0.332	3.77439e-79
FBXW11	1.06454e-83	0.422436	0.463	0.21	3.89633e-79
S100A4	1.09969e-83	-0.50878	0.461	0.668	4.02499e-79
PIK3C2A	1.15594e-83	0.282834	0.48	0.222	4.23086e-79
CAPS	1.24226e-83	0.441543	0.455	0.197	4.54678e-79
PNPLA2	1.29661e-83	0.237974	0.497	0.242	4.74572e-79
MBNL1	1.4418e-83	0.239423	0.588	0.313	5.27715e-79
RTN4	1.7862e-83	0.210841	0.711	0.406	6.53769e-79
GALNT7	1.88117e-83	0.392458	0.466	0.215	6.88527e-79
SLC14A1	2.38936e-83	-0.913754	0.007	0.129	8.7453e-79
ALDH1A1	2.41813e-83	0.460022	0.3	0.076	8.85058e-79
DDX21	2.46529e-83	0.571634	0.646	0.363	9.02321e-79
CPM	2.63949e-83	0.296063	0.244	0.04	9.66081e-79
MTDH	3.44078e-83	0.390441	0.715	0.385	1.25936e-78
VEZT	4.73853e-83	0.335567	0.521	0.253	1.73435e-78
FUT4	4.92951e-83	0.387842	0.295	0.079	1.80425e-78
TFRC	5.56272e-83	0.197791	0.503	0.239	2.03601e-78
PLEKHA4	6.8717e-83	0.378138	0.349	0.117	2.51511e-78
NQO1	7.90518e-83	0.466694	0.64	0.355	2.89337e-78
TENT5A	8.40594e-83	0.599113	0.431	0.181	3.07666e-78
KRT8	9.94428e-83	0.720121	0.878	0.555	3.6397e-78
LTBR	1.47429e-82	0.519748	0.561	0.28	5.39604e-78
ARFGEF1	1.5895e-82	0.447405	0.544	0.269	5.81774e-78
IGF2BP3	1.88339e-82	0.218014	0.34	0.104	6.8934e-78
RGP1	1.98138e-82	0.704161	0.365	0.134	7.25205e-78
FNBP4	2.02818e-82	0.396434	0.516	0.253	7.42332e-78
DYNLL2	2.29054e-82	0.225491	0.403	0.158	8.3836e-78
RAPH1	2.43557e-82	0.341546	0.416	0.172	8.91444e-78
PSMD13	3.28637e-82	0.0996735	0.503	0.252	1.20285e-77
PDIA4	3.35878e-82	0.271345	0.643	0.355	1.22935e-77
TOP1	4.17476e-82	0.369065	0.678	0.364	1.528e-77
ZBTB7A	8.43144e-82	0.48165	0.639	0.335	3.08599e-77
UNC5CL	9.8286e-82	0.36726	0.254	0.049	3.59736e-77
ESRP1	1.05895e-81	0.380963	0.506	0.251	3.87588e-77
TMEM30B	1.34598e-81	0.467997	0.461	0.217	4.92641e-77
PRRC2C	1.51607e-81	0.560243	0.79	0.406	5.54898e-77
RBM39	1.68286e-81	0.407394	0.738	0.42	6.15943e-77
RSBN1L	2.15634e-81	0.445563	0.539	0.276	7.89244e-77
HIPK2	2.21883e-81	0.335866	0.436	0.192	8.12114e-77
TSPYL1	2.59956e-81	0.313769	0.453	0.202	9.51465e-77
CNPY2	3.05464e-81	0.310376	0.573	0.307	1.11803e-76
SERINC1	3.34016e-81	0.217754	0.586	0.318	1.22253e-76
ZNF117	3.53751e-81	0.75087	0.299	0.082	1.29476e-76
RASSF6	4.23564e-81	0.566255	0.412	0.175	1.55029e-76
CTTN	5.60622e-81	0.156915	0.626	0.341	2.05193e-76
DHX36	5.7092e-81	0.335652	0.576	0.301	2.08962e-76
NDUFB9	8.79184e-81	0.377589	0.629	0.353	3.2179e-76
HNF1B	9.89099e-81	0.306207	0.306	0.088	3.6202e-76
PRKACB	9.90324e-81	0.293329	0.387	0.145	3.62468e-76
SLC6A8	1.04364e-80	0.499481	0.367	0.133	3.81981e-76
KPNA4	1.77179e-80	0.311622	0.54	0.278	6.48491e-76
SLC6A20	3.13155e-80	0.465673	0.371	0.14	1.14618e-75
KRT81	3.36052e-80	-1.27927	0.004	0.116	1.22998e-75
KIF5B	3.49414e-80	0.385286	0.661	0.362	1.27889e-75
SRPK1	3.71687e-80	0.520331	0.514	0.259	1.36041e-75
NPSR1	4.72624e-80	0.253023	0.163	0	1.72985e-75
LARP4B	4.84284e-80	0.315093	0.452	0.204	1.77253e-75
EIF1AY	5.10869e-80	0.0291634	0.201	0.016	1.86983e-75
FKBP1B	5.19503e-80	0.209849	0.272	0.058	1.90143e-75
AMD1	7.80759e-80	0.262791	0.545	0.282	2.85766e-75
RAB6A	9.22949e-80	0.269716	0.516	0.263	3.37808e-75
EIF4EBP1	1.17606e-79	0.0665357	0.429	0.18	4.30448e-75
TRIB1	1.28818e-79	0.355171	0.501	0.237	4.71488e-75
FAT1	1.47457e-79	0.224463	0.612	0.31	5.39707e-75
HSD17B12	1.71521e-79	0.267419	0.533	0.277	6.27783e-75
TBL1XR1	2.20593e-79	0.317333	0.582	0.31	8.07392e-75
SLC16A1	2.23588e-79	0.282781	0.317	0.096	8.18354e-75
LPIN1	2.56239e-79	0.340778	0.406	0.163	9.37861e-75
EZR	2.56899e-79	0.478145	0.85	0.543	9.40275e-75
STX16	3.62681e-79	0.259563	0.482	0.23	1.32745e-74
ITGA2	4.07699e-79	0.58297	0.682	0.37	1.49222e-74
PDCD6IP	4.14829e-79	0.270011	0.541	0.287	1.51831e-74
RPN1	4.66213e-79	0.19957	0.608	0.339	1.70639e-74
BICC1	4.83158e-79	0.383719	0.307	0.091	1.76841e-74
SMIM6	5.62509e-79	0.146655	0.263	0.057	2.05884e-74
KLC4	6.64363e-79	0.428815	0.318	0.098	2.43163e-74
LRG1	7.52509e-79	0.314832	0.331	0.106	2.75426e-74
FNIP2	7.83349e-79	0.368517	0.46	0.208	2.86713e-74
CORO1B	8.25881e-79	0.323397	0.52	0.262	3.02281e-74
ZNF217	1.10809e-78	0.346237	0.508	0.252	4.05571e-74
PRKCA	1.17023e-78	0.387512	0.4	0.161	4.28315e-74
SLC39A11	1.31235e-78	0.298282	0.399	0.158	4.80334e-74
CSNK2A1	1.62419e-78	0.324395	0.519	0.265	5.94471e-74
VPS13A	2.20032e-78	0.487397	0.427	0.184	8.05338e-74
GATAD1	2.44542e-78	0.353176	0.478	0.231	8.95049e-74
CHID1	2.49915e-78	0.0866198	0.41	0.167	9.14716e-74
OSBPL2	2.93048e-78	0.33834	0.465	0.217	1.07259e-73
EFR3A	4.22211e-78	0.298107	0.494	0.251	1.54533e-73
KAT6A	4.24916e-78	0.216521	0.44	0.196	1.55524e-73
OTUB1	4.50222e-78	0.19648	0.499	0.247	1.64786e-73
SMARCA5	5.34274e-78	0.274975	0.573	0.301	1.95549e-73
RAB5A	5.64322e-78	0.200031	0.488	0.24	2.06547e-73
ARHGEF35	6.07517e-78	0.362599	0.506	0.257	2.22357e-73
AKAP13	6.14669e-78	0.407011	0.709	0.389	2.24975e-73
SRSF1	6.42643e-78	0.252286	0.509	0.253	2.35214e-73
MACF1	6.55127e-78	0.370255	0.666	0.357	2.39783e-73
AMN	9.7856e-78	0.267239	0.394	0.15	3.58163e-73
MLPH	1.05704e-77	0.255244	0.584	0.315	3.86888e-73
THUMPD3-AS1	1.07894e-77	0.428207	0.423	0.184	3.94904e-73
PLAGL1	1.12484e-77	0.241441	0.256	0.052	4.11701e-73
WAPL	1.6072e-77	0.534479	0.486	0.238	5.88252e-73
RAB1A	1.97877e-77	0.184652	0.587	0.32	7.24249e-73
LONP2	1.98738e-77	0.279633	0.495	0.246	7.27401e-73
COPG1	2.22279e-77	0.263323	0.46	0.22	8.13563e-73
ARGLU1	2.32079e-77	0.542238	0.676	0.361	8.49433e-73
EIF4B	2.55053e-77	0.190539	0.663	0.379	9.33519e-73
DAZAP2	2.77006e-77	0.0231369	0.592	0.333	1.01387e-72
INF2	2.81256e-77	0.257573	0.583	0.317	1.02943e-72
U2SURP	3.09531e-77	0.357433	0.618	0.321	1.13291e-72
MVP	3.26697e-77	0.281499	0.612	0.341	1.19574e-72
HLA-E	3.32907e-77	0.341157	0.82	0.479	1.21847e-72
ECI2	3.49247e-77	0.291226	0.349	0.117	1.27828e-72
KNOP1	3.81006e-77	0.495668	0.506	0.238	1.39452e-72
KDELR1	4.26688e-77	0.363829	0.623	0.344	1.56172e-72
FGD6	4.35904e-77	0.392435	0.45	0.199	1.59545e-72
ATP5F1C	5.12489e-77	0.23121	0.602	0.338	1.87576e-72
RSRC1	5.21136e-77	0.315662	0.457	0.206	1.90741e-72
DYNC1H1	5.43228e-77	0.31746	0.688	0.373	1.98827e-72
DDX27	6.29264e-77	0.256848	0.55	0.298	2.30317e-72
TNFRSF14	6.34063e-77	0.288131	0.477	0.225	2.32073e-72
CP	7.88511e-77	0.96645	0.242	0.047	2.88603e-72
HNRNPA3	8.44174e-77	0.356155	0.733	0.41	3.08976e-72
GBP2	9.36073e-77	0.326081	0.503	0.248	3.42612e-72
ETFB	9.83365e-77	0.203413	0.646	0.378	3.59922e-72
JUP	1.39217e-76	0.321261	0.717	0.41	5.0955e-72
ADD1	1.45131e-76	0.209306	0.511	0.253	5.31194e-72
ZNF207	1.51051e-76	0.2133	0.605	0.333	5.5286e-72
HNF1A-AS1	1.64206e-76	0.290436	0.196	0.019	6.0101e-72
LACTB2	1.96344e-76	0.378125	0.428	0.191	7.18639e-72
MUC16	1.97847e-76	-1.18476	0.088	0.27	7.24142e-72
TM2D2	2.30659e-76	0.508088	0.337	0.124	8.44235e-72
IL32	2.65923e-76	0.501687	0.647	0.355	9.73305e-72
SDCBP2	2.79947e-76	0.301159	0.5	0.241	1.02463e-71
PLEKHA5	3.05995e-76	0.482952	0.484	0.243	1.11997e-71
PLPBP	3.34379e-76	0.182772	0.35	0.123	1.22386e-71
EFNA1	3.39259e-76	0.365741	0.535	0.276	1.24172e-71
PGM3	4.15156e-76	0.232015	0.377	0.147	1.51951e-71
UGCG	4.36589e-76	0.430849	0.509	0.264	1.59796e-71
ARHGAP29	4.98933e-76	0.243366	0.332	0.11	1.82615e-71
KMT2A	5.05057e-76	0.387587	0.589	0.319	1.84856e-71
HIGD1A	5.57972e-76	0.256253	0.431	0.199	2.04223e-71
MYH9	6.16024e-76	0.208222	0.682	0.392	2.25471e-71
GOLIM4	6.70077e-76	0.273781	0.449	0.203	2.45255e-71
DYNC1LI2	7.42674e-76	0.326566	0.592	0.313	2.71826e-71
CLDN10	1.12276e-75	0.666888	0.479	0.226	4.1094e-71
MYO1C	1.15369e-75	0.0786911	0.49	0.243	4.22263e-71
CEP57	1.38072e-75	0.338488	0.446	0.208	5.05357e-71
CD151	1.66309e-75	0.158637	0.728	0.44	6.08708e-71
KMT2C	1.67847e-75	0.428165	0.565	0.294	6.14337e-71
AUP1	1.75481e-75	0.17368	0.54	0.282	6.42278e-71
CREBZF	1.81775e-75	0.312012	0.407	0.165	6.65316e-71
SLC35A3	1.87767e-75	0.355719	0.468	0.224	6.87244e-71
COPB1	2.02365e-75	0.26214	0.55	0.302	7.40676e-71
FOXP1	2.18341e-75	0.329158	0.605	0.332	7.9915e-71
AL355312.4	2.38223e-75	0.240416	0.378	0.147	8.71918e-71
BIRC6	2.43325e-75	0.328243	0.503	0.248	8.90593e-71
ARHGAP12	2.75349e-75	0.465361	0.488	0.241	1.00781e-70
AP3D1	2.84658e-75	0.301158	0.524	0.263	1.04188e-70
RTN3	4.16186e-75	0.241403	0.6	0.333	1.52328e-70
SLC25A37	4.90995e-75	0.455697	0.515	0.264	1.79709e-70
PFKP	5.42564e-75	0.222008	0.482	0.239	1.98584e-70
CEBPD	5.8209e-75	0.173286	0.561	0.29	2.13051e-70
IL18	5.97556e-75	0.322335	0.479	0.23	2.18711e-70
PLPP5	6.04357e-75	0.0869876	0.415	0.182	2.21201e-70
ATP5F1B	6.39765e-75	0.130008	0.668	0.4	2.3416e-70
DCAF7	6.55749e-75	0.347027	0.441	0.205	2.40011e-70
PAK1	7.512e-75	0.320248	0.461	0.218	2.74947e-70
HID1	8.40635e-75	0.368839	0.347	0.126	3.07681e-70
PKN2	8.42844e-75	0.399144	0.576	0.298	3.08489e-70
HERPUD1	8.53761e-75	0.0675525	0.589	0.321	3.12485e-70
RBM6	1.00547e-74	0.29476	0.435	0.194	3.68014e-70
MRPS5	1.01146e-74	0.382027	0.49	0.244	3.70204e-70
SQLE	1.20479e-74	0.506851	0.476	0.228	4.40965e-70
COPZ1	1.26705e-74	0.093054	0.522	0.273	4.63755e-70
N4BP2L2	1.33167e-74	0.377385	0.645	0.348	4.87404e-70
PAFAH1B1	1.49947e-74	0.197375	0.473	0.227	5.48822e-70
DIAPH1	1.72218e-74	0.306042	0.592	0.32	6.30335e-70
RBM25	1.85392e-74	0.416026	0.641	0.342	6.78554e-70
VPS35	2.01087e-74	0.293997	0.543	0.3	7.35999e-70
SNHG16	2.44558e-74	0.144101	0.468	0.228	8.95108e-70
TGFB1	2.94542e-74	-0.0220511	0.376	0.132	1.07805e-69
USO1	3.55588e-74	0.168111	0.487	0.243	1.30149e-69
MEIS2	3.86197e-74	0.440969	0.448	0.208	1.41352e-69
ABI1	4.45281e-74	0.249915	0.491	0.24	1.62977e-69
SLC25A36	4.52093e-74	0.27878	0.489	0.246	1.65471e-69
GOLGA3	4.61747e-74	0.281101	0.479	0.237	1.69004e-69
ERRFI1	5.1832e-74	0.359587	0.586	0.309	1.8971e-69
PRPF38B	6.29101e-74	0.359564	0.554	0.289	2.30257e-69
RPS26	6.49408e-74	1.16053	0.795	0.523	2.3769e-69
TSPAN31	7.8877e-74	0.131423	0.366	0.136	2.88698e-69
DNPH1	8.12809e-74	0.476693	0.535	0.288	2.97496e-69
RAB2A	8.25429e-74	0.293108	0.649	0.366	3.02115e-69
LARP1	8.41687e-74	0.307775	0.585	0.313	3.08066e-69
AADAC	8.5858e-74	0.30939	0.155	0.002	3.14249e-69
LRP1	9.46394e-74	0.231565	0.544	0.275	3.4639e-69
ZBED5	1.14706e-73	0.209309	0.324	0.106	4.19836e-69
CCDC107	1.16885e-73	0.709081	0.515	0.273	4.2781e-69
LRBA	1.18227e-73	0.349547	0.456	0.215	4.32723e-69
SAP30BP	1.21924e-73	0.272382	0.434	0.198	4.46256e-69
BCAS1	1.31049e-73	0.50089	0.362	0.139	4.79651e-69
KIF21A	1.41665e-73	0.390482	0.392	0.163	5.1851e-69
LRRC1	1.4883e-73	0.270536	0.41	0.18	5.44731e-69
UBE2K	1.83936e-73	0.20028	0.563	0.299	6.73224e-69
DDX3Y	1.98907e-73	-0.0160703	0.2	0.021	7.28019e-69
EXOC7	2.04023e-73	0.306046	0.399	0.163	7.46746e-69
PTGR1	2.04891e-73	-0.0207248	0.423	0.189	7.4992e-69
ARL14	2.08954e-73	0.544397	0.354	0.133	7.64792e-69
ELF3	2.1617e-73	0.505008	0.822	0.47	7.91205e-69
IFT172	2.35862e-73	0.271776	0.385	0.158	8.63277e-69
S100P	2.48052e-73	0.586546	0.739	0.451	9.07896e-69
SETD2	2.84894e-73	0.29401	0.473	0.229	1.04274e-68
ITSN2	3.37648e-73	0.341882	0.495	0.243	1.23582e-68
PRPF40A	4.11643e-73	0.323222	0.603	0.333	1.50666e-68
B2M	7.94619e-73	-0.581772	0.967	0.96	2.90839e-68
MAPK3	8.42668e-73	0.308996	0.498	0.254	3.08425e-68
AZGP1	8.60255e-73	0.476249	0.344	0.12	3.14862e-68
GPATCH8	8.86632e-73	0.272206	0.486	0.241	3.24516e-68
TRIP12	8.87092e-73	0.259491	0.565	0.301	3.24685e-68
CYP2C18	9.03253e-73	0.310534	0.226	0.042	3.306e-68
HNRNPDL	1.3536e-72	0.186206	0.725	0.434	4.95431e-68
FGD5-AS1	1.39995e-72	0.230831	0.485	0.246	5.12395e-68
PLEC	1.40601e-72	0.431798	0.754	0.436	5.14614e-68
MPLKIP	1.55685e-72	0.189017	0.425	0.193	5.69821e-68
LY75	1.8416e-72	0.339194	0.375	0.149	6.74043e-68
RDH11	1.85476e-72	0.320493	0.445	0.211	6.78859e-68
AGR2	2.14773e-72	0.677011	0.786	0.506	7.86089e-68
COX19	2.16108e-72	0.184791	0.44	0.203	7.90976e-68
CEBPZ	2.82777e-72	0.292945	0.506	0.259	1.03499e-67
CHD7	2.97068e-72	0.423227	0.427	0.192	1.0873e-67
CHDH	3.01324e-72	0.190593	0.298	0.089	1.10288e-67
MICU1	3.02987e-72	0.36665	0.471	0.238	1.10896e-67
KLF5	3.10066e-72	0.367588	0.629	0.359	1.13487e-67
ZNF274	3.19701e-72	0.238472	0.299	0.09	1.17014e-67
ZC3H12A	3.20555e-72	0.287411	0.386	0.157	1.17326e-67
KAT6B	3.25772e-72	0.482283	0.448	0.213	1.19236e-67
CXCL2	3.42075e-72	0.64076	0.371	0.137	1.25203e-67
GDA	3.96639e-72	0.430905	0.301	0.094	1.45174e-67
ATP7B	4.49533e-72	0.260284	0.204	0.029	1.64533e-67
SLC1A1	4.68547e-72	0.384487	0.322	0.105	1.71493e-67
TMEM181	4.83395e-72	0.267926	0.445	0.208	1.76927e-67
SPTY2D1	5.44389e-72	0.257576	0.489	0.255	1.99252e-67
MAGI1	5.61269e-72	0.279425	0.398	0.17	2.0543e-67
ZNFX1	6.27834e-72	0.326677	0.454	0.213	2.29794e-67
ALDH3A2	6.70147e-72	0.294558	0.361	0.137	2.4528e-67
PPIG	6.7322e-72	0.282106	0.606	0.331	2.46405e-67
ZNF638	6.88191e-72	0.395801	0.552	0.292	2.51885e-67
MBNL2	7.08014e-72	0.365597	0.563	0.3	2.5914e-67
ALDH3B1	7.88268e-72	0.365936	0.344	0.127	2.88514e-67
SLC3A2	8.36539e-72	0.130658	0.585	0.325	3.06182e-67
CDKN2AIP	8.96536e-72	0.207687	0.352	0.13	3.28141e-67
PHF20L1	9.78431e-72	0.334643	0.512	0.264	3.58115e-67
SBDS	1.00551e-71	0.256559	0.611	0.363	3.68027e-67
HIST1H1C	1.06678e-71	0.525849	0.554	0.288	3.90452e-67
KIAA1109	1.10065e-71	0.426264	0.424	0.189	4.02849e-67
HIST1H1E	1.26349e-71	0.396207	0.316	0.099	4.62449e-67
PALM3	1.30737e-71	0.336453	0.183	0.018	4.78511e-67
UBE2V1	1.49101e-71	0.198297	0.608	0.344	5.45725e-67
RAB5B	1.63978e-71	0.29918	0.408	0.18	6.00175e-67
DERL1	1.86055e-71	0.194854	0.497	0.26	6.8098e-67
SLC25A25-AS1	1.96703e-71	0.361712	0.237	0.05	7.19954e-67
IST1	2.23842e-71	0.223297	0.541	0.289	8.19284e-67
GTF2F1	2.51734e-71	0.341462	0.487	0.24	9.21372e-67
FXYD3	2.56458e-71	-0.925522	0.75	0.789	9.38661e-67
HIP1R	3.33963e-71	0.483788	0.33	0.12	1.22234e-66
LMO7	3.89078e-71	0.312507	0.69	0.379	1.42406e-66
ARID4A	4.2325e-71	0.314179	0.449	0.213	1.54914e-66
FAM120AOS	5.69684e-71	0.453244	0.483	0.25	2.0851e-66
CDC42EP4	5.92481e-71	0.304195	0.394	0.173	2.16854e-66
ATP5PD	6.259e-71	0.280865	0.608	0.358	2.29086e-66
AFF1	6.46499e-71	0.248755	0.432	0.198	2.36625e-66
NT5C3A	6.66065e-71	0.350747	0.458	0.233	2.43786e-66
LINC00511	9.19561e-71	0.413732	0.476	0.236	3.36568e-66
NPEPPS	1.00605e-70	0.269844	0.551	0.293	3.68225e-66
SNX6	1.03825e-70	0.236739	0.576	0.32	3.80009e-66
NSUN6	1.15238e-70	0.336186	0.259	0.064	4.21784e-66
GOLGA2	1.18752e-70	0.333431	0.51	0.261	4.34644e-66
R3HDM2	1.23471e-70	0.411632	0.428	0.202	4.51916e-66
NPC1L1	1.36534e-70	0.21135	0.165	0.01	4.99728e-66
PSMA3-AS1	1.4054e-70	0.213248	0.466	0.221	5.14391e-66
NFIB	1.41596e-70	0.251713	0.427	0.196	5.18254e-66
PSMC5	1.54375e-70	0.222558	0.532	0.286	5.65027e-66
FBXO34	1.56932e-70	0.387574	0.463	0.226	5.74386e-66
WBP2	1.60893e-70	0.165894	0.474	0.234	5.88885e-66
EIF3E	1.66872e-70	0.365132	0.699	0.434	6.10767e-66
RNF141	2.37729e-70	0.184016	0.342	0.126	8.70112e-66
SETD5	2.40816e-70	0.243656	0.449	0.209	8.8141e-66
CASR	2.47951e-70	0.310876	0.207	0.032	9.07524e-66
RBM5	2.60201e-70	0.250687	0.466	0.222	9.52363e-66
PLOD2	2.62721e-70	0.324182	0.355	0.137	9.61584e-66
CREB3L1	2.72069e-70	0.207174	0.417	0.185	9.95801e-66
CNBP	2.93449e-70	0.106657	0.632	0.387	1.07405e-65
STOM	3.06187e-70	0.187493	0.291	0.083	1.12067e-65
UBXN4	3.07491e-70	0.331691	0.644	0.34	1.12545e-65
TRIM31	3.3533e-70	0.497397	0.34	0.124	1.22734e-65
MATN2	3.53348e-70	0.257914	0.266	0.071	1.29329e-65
ZNF91	4.07234e-70	0.498855	0.389	0.169	1.49052e-65
PRPF6	4.53343e-70	0.215736	0.535	0.29	1.65928e-65
PTPN12	5.15811e-70	0.289586	0.59	0.321	1.88792e-65
TM4SF1	5.33301e-70	0.557824	0.832	0.588	1.95193e-65
DNM2	6.37847e-70	0.247511	0.547	0.291	2.33458e-65
SF3B5	6.66422e-70	0.0682521	0.557	0.318	2.43917e-65
ADIRF	6.93214e-70	-1.29715	0.304	0.512	2.53723e-65
RPS6KB1	7.06695e-70	0.264742	0.329	0.116	2.58658e-65
BET1L	7.36295e-70	0.0772652	0.295	0.088	2.69491e-65
HEXIM1	7.57681e-70	0.443552	0.457	0.221	2.77319e-65
C4orf19	8.18825e-70	0.304514	0.353	0.134	2.99698e-65
EPN1	8.3604e-70	0.167009	0.501	0.266	3.05999e-65
ACVR1B	8.96404e-70	0.192095	0.353	0.134	3.28093e-65
RHOG	1.02393e-69	0.0600053	0.406	0.174	3.7477e-65
KIAA1217	1.20721e-69	0.140455	0.458	0.213	4.41852e-65
SEPTIN11	1.26878e-69	0.160916	0.516	0.265	4.64388e-65
MBIP	1.53141e-69	0.368707	0.391	0.168	5.6051e-65
GPBP1L1	1.5596e-69	0.260616	0.482	0.244	5.7083e-65
ST14	1.65613e-69	0.236752	0.608	0.335	6.0616e-65
KRT16	1.71217e-69	-1.6274	0.177	0.362	6.26671e-65
MRPL12	1.75605e-69	0.191195	0.4	0.178	6.4273e-65
SNRNP200	1.89988e-69	0.233414	0.529	0.282	6.95374e-65
VIL1	2.1817e-69	0.246218	0.264	0.07	7.98526e-65
FXR1	2.24532e-69	0.200747	0.565	0.312	8.2181e-65
PRMT1	2.29736e-69	0.0190055	0.506	0.269	8.40858e-65
SSB	2.94347e-69	0.179334	0.562	0.318	1.07734e-64
SPAG16	3.79873e-69	0.214489	0.402	0.177	1.39037e-64
TPP1	3.9992e-69	0.0457859	0.416	0.184	1.46375e-64
ARL6IP1	4.03444e-69	0.311243	0.703	0.416	1.47665e-64
THOC2	4.18616e-69	0.411772	0.548	0.293	1.53218e-64
LASP1	4.266e-69	0.229685	0.538	0.295	1.5614e-64
COL1A1	4.50166e-69	-1.07999	0.667	0.735	1.64765e-64
PKP2	4.55171e-69	0.431082	0.379	0.164	1.66597e-64
PJA2	4.89919e-69	0.206813	0.53	0.285	1.79315e-64
TRIM47	5.13672e-69	0.210995	0.423	0.188	1.88009e-64
TPM2	5.26782e-69	1.05697	0.611	0.344	1.92808e-64
TRA2B	5.59122e-69	0.221231	0.612	0.336	2.04644e-64
MLLT6	6.37871e-69	0.303569	0.47	0.232	2.33467e-64
CDC37	6.50269e-69	0.233103	0.618	0.339	2.38005e-64
XIAP	7.00902e-69	0.318415	0.532	0.285	2.56537e-64
APOL1	7.03048e-69	0.642869	0.549	0.282	2.57323e-64
UBR5	7.26987e-69	0.345903	0.464	0.226	2.66084e-64
TULP4	7.68559e-69	0.409111	0.414	0.186	2.813e-64
SLC38A5	8.4004e-69	0.218569	0.247	0.057	3.07463e-64
PPP4C	8.42237e-69	0.100005	0.57	0.315	3.08267e-64
RAB10	9.47659e-69	0.190029	0.589	0.324	3.46853e-64
SLC38A10	1.05118e-68	0.15908	0.428	0.197	3.84742e-64
PLD3	1.12492e-68	0.13383	0.524	0.269	4.11733e-64
TRMT11	1.1376e-68	0.236503	0.339	0.127	4.16375e-64
BLOC1S1	1.32833e-68	0.108953	0.629	0.361	4.86181e-64
SYNRG	1.35072e-68	0.287371	0.401	0.174	4.94378e-64
CTR9	1.36664e-68	0.180075	0.392	0.168	5.00202e-64
PPFIBP2	1.52125e-68	0.222424	0.217	0.04	5.56791e-64
ATP10B	1.63949e-68	0.424659	0.186	0.023	6.00071e-64
C1QTNF12	1.83105e-68	0.324059	0.279	0.082	6.70183e-64
NUFIP2	2.03868e-68	0.218021	0.611	0.346	7.46177e-64
PLOD3	2.16914e-68	0.114019	0.442	0.216	7.93926e-64
SNX3	2.26703e-68	0.0473712	0.602	0.343	8.29757e-64
GPR160	2.80819e-68	0.222876	0.363	0.144	1.02783e-63
PPP4R2	2.93213e-68	0.214765	0.452	0.228	1.07319e-63
ST6GALNAC1	3.00019e-68	0.322348	0.362	0.139	1.0981e-63
PARP14	3.07272e-68	0.314053	0.552	0.286	1.12464e-63
STIP1	3.58759e-68	0.112279	0.472	0.238	1.31309e-63
RAD50	4.02529e-68	0.327181	0.514	0.268	1.4733e-63
VSNL1	4.15498e-68	-0.207631	0.01	0.118	1.52076e-63
SEMA6A	4.25911e-68	0.213902	0.2	0.031	1.55888e-63
CFAP97	4.60206e-68	0.315621	0.459	0.224	1.6844e-63
USH1C	4.81957e-68	0.394098	0.45	0.223	1.76401e-63
VARS	5.36872e-68	0.292126	0.417	0.192	1.96501e-63
FAM91A1	5.50527e-68	0.310367	0.462	0.239	2.01498e-63
VSIG2	6.09115e-68	0.330788	0.481	0.254	2.22942e-63
UTRN	6.71289e-68	0.328129	0.463	0.22	2.45699e-63
LMTK2	7.2519e-68	0.326948	0.385	0.167	2.65427e-63
PLAG1	7.45527e-68	0.232688	0.233	0.051	2.7287e-63
NF1	7.95417e-68	0.230808	0.5	0.256	2.9113e-63
HTATIP2	8.27278e-68	0.17297	0.48	0.246	3.02792e-63
FUT2	8.99604e-68	0.445099	0.411	0.187	3.29264e-63
SPG7	9.31805e-68	0.256465	0.479	0.236	3.4105e-63
SEC23A	1.07933e-67	0.124533	0.402	0.175	3.95045e-63
BTG2	1.17066e-67	0.478798	0.5	0.257	4.28474e-63
ZRANB2	1.36754e-67	0.293853	0.527	0.276	5.00533e-63
SNW1	1.75816e-67	0.199529	0.515	0.277	6.43503e-63
GSTM3	1.8193e-67	0.177181	0.478	0.239	6.65883e-63
GARS	2.07752e-67	0.235278	0.437	0.215	7.60393e-63
ACTR3	2.38022e-67	0.150915	0.638	0.371	8.71186e-63
UBE2D3	2.38368e-67	0.113867	0.674	0.398	8.72451e-63
MLX	2.54849e-67	0.0975639	0.447	0.219	9.32772e-63
ARHGAP18	2.89045e-67	0.419558	0.484	0.255	1.05793e-62
LRATD2	3.31887e-67	0.409658	0.431	0.216	1.21474e-62
CREBRF	3.45015e-67	0.228072	0.495	0.256	1.26279e-62
MED13	3.80977e-67	0.28096	0.46	0.231	1.39442e-62
HELZ	3.81487e-67	0.242581	0.392	0.171	1.39628e-62
PHIP	4.21163e-67	0.343563	0.566	0.306	1.5415e-62
TSSC4	4.49914e-67	0.12605	0.413	0.187	1.64673e-62
IQGAP2	4.70571e-67	0.275352	0.424	0.195	1.72234e-62
CCDC18-AS1	5.11409e-67	0.301748	0.288	0.09	1.87181e-62
PNRC1	5.12629e-67	0.166102	0.602	0.34	1.87627e-62
PARD6B	6.04202e-67	0.263712	0.454	0.217	2.21144e-62
NFE2L2	7.34021e-67	0.219482	0.615	0.345	2.68659e-62
TOLLIP	8.07377e-67	0.0840886	0.405	0.182	2.95508e-62
PTGES3	8.54219e-67	0.240758	0.7	0.433	3.12653e-62
PAX7	8.69793e-67	-0.108047	0.005	0.102	3.18353e-62
PPARG	1.00425e-66	0.171676	0.315	0.112	3.67564e-62
EFCAB14	1.04971e-66	0.179588	0.516	0.272	3.84206e-62
SARS	1.19066e-66	0.277304	0.504	0.267	4.35793e-62
HDAC2	1.2221e-66	0.202469	0.512	0.269	4.473e-62
JAG1	1.24082e-66	0.302577	0.454	0.223	4.54152e-62
PHACTR2	1.35763e-66	0.295921	0.489	0.249	4.96907e-62
CTSA	1.37275e-66	0.0859311	0.558	0.295	5.0244e-62
TMEM41B	1.42068e-66	0.138325	0.379	0.163	5.19984e-62
PGRMC2	1.48191e-66	0.14777	0.475	0.237	5.42395e-62
CELF1	1.69205e-66	0.219929	0.522	0.284	6.19308e-62
SMC5	1.70062e-66	0.331761	0.498	0.262	6.22443e-62
YPEL2	1.84987e-66	0.254128	0.331	0.122	6.77073e-62
MRPS18B	1.90063e-66	0.170776	0.433	0.208	6.95651e-62
SH3D19	1.91767e-66	0.114874	0.389	0.166	7.01885e-62
SRSF11	2.09469e-66	0.287606	0.629	0.347	7.66677e-62
MRPL13	2.11052e-66	0.211695	0.467	0.236	7.72473e-62
RSRC2	2.15297e-66	0.221854	0.612	0.347	7.8801e-62
MKNK2	2.16681e-66	0.217926	0.459	0.23	7.93075e-62
C11orf54	2.2792e-66	0.243348	0.373	0.159	8.34209e-62
ERLIN2	2.83911e-66	0.0536384	0.35	0.139	1.03914e-61
PHRF1	3.08913e-66	0.200148	0.329	0.122	1.13065e-61
RNPS1	3.11707e-66	0.146749	0.579	0.32	1.14088e-61
EIF5	3.50367e-66	0.185109	0.671	0.393	1.28238e-61
THRAP3	3.82055e-66	0.243289	0.583	0.314	1.39836e-61
HGS	4.25437e-66	0.20318	0.438	0.203	1.55714e-61
ARRDC3	4.56932e-66	0.149598	0.343	0.126	1.67242e-61
SEC24D	5.80255e-66	0.104712	0.362	0.149	2.12379e-61
ARHGEF38	6.18776e-66	0.525303	0.251	0.069	2.26478e-61
SLC16A3	6.45164e-66	0.131984	0.484	0.249	2.36137e-61
HIF1A	6.64678e-66	0.332537	0.592	0.328	2.43279e-61
NELFE	6.86794e-66	0.199173	0.501	0.266	2.51373e-61
ETS2	6.90062e-66	0.249433	0.532	0.286	2.5257e-61
MUC12	7.69326e-66	0.114393	0.217	0.043	2.81581e-61
MRPL2	8.18521e-66	0.314177	0.372	0.16	2.99587e-61
SCRN1	8.78488e-66	0.152073	0.361	0.147	3.21535e-61
NORAD	8.97754e-66	0.123697	0.684	0.404	3.28587e-61
XIST	9.31054e-66	-0.759659	0.096	0.278	3.40775e-61
RBM4	9.69367e-66	0.145984	0.53	0.287	3.54798e-61
ATF6B	1.03534e-65	0.354861	0.47	0.239	3.78946e-61
NT5DC1	1.07585e-65	0.15616	0.376	0.161	3.93772e-61
SMARCA4	1.13152e-65	0.321501	0.532	0.282	4.14149e-61
DEFB1	1.15904e-65	0.627398	0.307	0.105	4.2422e-61
CSNK2B	1.23132e-65	0.0992336	0.587	0.341	4.50674e-61
GSN	1.31694e-65	0.3013	0.697	0.395	4.82013e-61
MIA2	1.39435e-65	0.308424	0.533	0.283	5.10348e-61
PEG10	1.55416e-65	0.254664	0.17	0.017	5.68838e-61
CHD8	1.63554e-65	0.343104	0.459	0.228	5.98625e-61
FRYL	1.85369e-65	0.308864	0.452	0.221	6.78468e-61
FKBP8	1.93665e-65	0.150731	0.576	0.319	7.08834e-61
DIAPH2	2.23327e-65	0.454188	0.432	0.208	8.17398e-61
SMURF1	2.36405e-65	0.22241	0.41	0.192	8.65267e-61
HKDC1	2.43278e-65	0.613498	0.4	0.179	8.90422e-61
CCNI	2.8222e-65	0.209283	0.733	0.448	1.03295e-60
COIL	2.83781e-65	0.269486	0.35	0.14	1.03867e-60
SS18	2.97134e-65	0.276528	0.428	0.209	1.08754e-60
CXCL3	3.10528e-65	0.576016	0.41	0.181	1.13656e-60
ORMDL2	3.27996e-65	0.174815	0.453	0.231	1.2005e-60
CARS	3.47027e-65	0.171663	0.349	0.136	1.27016e-60
EPS8	4.14557e-65	0.274769	0.617	0.334	1.51732e-60
HNRNPC	4.16451e-65	0.254447	0.742	0.441	1.52425e-60
SFPQ	4.50549e-65	0.239018	0.659	0.37	1.64905e-60
IFNGR1	4.59422e-65	0.0519285	0.445	0.207	1.68153e-60
TES	4.9563e-65	0.236363	0.569	0.314	1.81406e-60
PSMD7	5.15407e-65	0.235889	0.577	0.321	1.88644e-60
CDK2AP2	5.35925e-65	0.124514	0.466	0.232	1.96154e-60
BAG6	5.56347e-65	0.0272136	0.511	0.277	2.03628e-60
SLC43A1	5.58626e-65	0.18622	0.156	0.01	2.04463e-60
SHPRH	5.72724e-65	0.274488	0.327	0.12	2.09623e-60
TFF1	6.15458e-65	1.26631	0.611	0.381	2.25264e-60
SEL1L	6.47919e-65	0.266002	0.489	0.256	2.37145e-60
LINC02532	6.79608e-65	0.34236	0.144	0.005	2.48743e-60
CCDC68	7.38922e-65	0.358457	0.38	0.169	2.70453e-60
TMEM30A	7.83126e-65	0.179263	0.531	0.287	2.86632e-60
YWHAG	9.83618e-65	0.121891	0.531	0.302	3.60014e-60
GNA13	1.06015e-64	0.197244	0.369	0.155	3.88025e-60
HNRNPH1	1.11335e-64	0.059985	0.702	0.414	4.07498e-60
AP2B1	1.27863e-64	0.232515	0.591	0.332	4.67991e-60
MRPS35	1.30084e-64	0.255613	0.451	0.228	4.7612e-60
TP53I3	1.52688e-64	0.381541	0.444	0.219	5.58854e-60
DARS	1.53429e-64	0.225477	0.491	0.265	5.61567e-60
AKR1B10	1.63953e-64	0.346534	0.174	0.021	6.00084e-60
AZIN1	1.68475e-64	0.0213971	0.542	0.301	6.16635e-60
ARCN1	1.68851e-64	0.150079	0.497	0.269	6.18013e-60
CCDC12	1.69572e-64	0.150874	0.512	0.28	6.20649e-60
BHLHE41	1.7503e-64	0.381948	0.274	0.085	6.40628e-60
MTMR11	1.78147e-64	0.278297	0.439	0.215	6.52036e-60
ATP6V1H	1.9405e-64	0.156336	0.393	0.171	7.10241e-60
FOXA3	2.00529e-64	0.185774	0.361	0.146	7.33955e-60
CASP4	2.14225e-64	0.148618	0.478	0.241	7.84084e-60
LMBRD1	2.16365e-64	0.160925	0.48	0.252	7.91918e-60
GOSR2	2.43875e-64	0.110896	0.379	0.158	8.92606e-60
UBE2E1	2.60314e-64	0.0573351	0.379	0.164	9.52775e-60
IFITM2	2.63012e-64	0.0582821	0.669	0.399	9.6265e-60
SLC35F5	2.63685e-64	0.154554	0.492	0.259	9.65114e-60
SF3B1	2.83651e-64	0.156395	0.661	0.385	1.03819e-59
MAP1LC3B	2.97032e-64	0.0444301	0.624	0.377	1.08717e-59
ARHGAP21	2.98199e-64	0.336584	0.489	0.246	1.09144e-59
LINC02381	3.24479e-64	0.230223	0.203	0.037	1.18763e-59
TERF2IP	3.45408e-64	0.156454	0.508	0.271	1.26423e-59
ATP5PB	3.64883e-64	0.157233	0.544	0.299	1.33551e-59
WDR1	3.65526e-64	0.0430457	0.537	0.292	1.33786e-59
CRK	3.72165e-64	0.0698049	0.405	0.188	1.36216e-59
NFE2L1	4.68329e-64	0.128969	0.556	0.293	1.71413e-59
STRN3	5.54256e-64	0.219219	0.419	0.191	2.02863e-59
THRB	5.87955e-64	0.196096	0.213	0.044	2.15198e-59
PAWR	6.32972e-64	0.241126	0.498	0.256	2.31674e-59
SIGIRR	6.53522e-64	0.11982	0.403	0.184	2.39196e-59
TIMM10B	7.38862e-64	0.1401	0.329	0.125	2.70431e-59
CTSE	7.41898e-64	0.432402	0.718	0.425	2.71542e-59
PSMB9	7.54599e-64	0.296595	0.503	0.253	2.76191e-59
CLIP2	7.80269e-64	0.228929	0.338	0.133	2.85586e-59
OGT	7.9838e-64	0.401162	0.431	0.209	2.92215e-59
PLBD1	8.00483e-64	0.363542	0.513	0.273	2.92985e-59
TTC17	8.01212e-64	0.208358	0.434	0.212	2.93252e-59
TOX4	8.12999e-64	0.215246	0.493	0.26	2.97566e-59
LARS	8.44667e-64	0.286745	0.503	0.267	3.09156e-59
PSMC6	8.95713e-64	0.187508	0.572	0.326	3.2784e-59
GIGYF1	9.26516e-64	0.242807	0.345	0.139	3.39114e-59
NABP2	9.70131e-64	0.345474	0.341	0.14	3.55078e-59
FOXA2	9.80085e-64	0.207533	0.247	0.063	3.58721e-59
ZYX	1.26843e-63	0.165421	0.48	0.249	4.64258e-59
ANO9	1.43599e-63	0.296727	0.22	0.048	5.25585e-59
GOLGA5	1.48309e-63	0.236806	0.413	0.194	5.42827e-59
CLEC2B	1.56985e-63	-0.811042	0.063	0.211	5.74581e-59
UQCC2	1.65369e-63	0.164567	0.488	0.255	6.05268e-59
GLB1	1.65646e-63	0.192401	0.354	0.146	6.0628e-59
SMARCC1	1.6891e-63	0.319605	0.502	0.267	6.18229e-59
NPC1	1.73161e-63	0.342408	0.365	0.159	6.33788e-59
TBRG1	1.83687e-63	0.180774	0.388	0.173	6.72311e-59
RNASET2	1.93258e-63	0.504872	0.664	0.39	7.07344e-59
SYCE1	2.26056e-63	0.126973	0.148	0.007	8.27387e-59
VIM	2.38004e-63	-1.39009	0.53	0.645	8.71119e-59
SIL1	2.40964e-63	0.308831	0.414	0.195	8.81952e-59
DNAJC22	2.52141e-63	0.287539	0.29	0.098	9.2286e-59
OCLN	2.59792e-63	0.448557	0.466	0.239	9.50864e-59
NAP1L4	2.73006e-63	0.180567	0.522	0.286	9.9923e-59
AL133453.1	2.96246e-63	0.352891	0.351	0.145	1.08429e-58
KALRN	3.30018e-63	0.180921	0.261	0.078	1.2079e-58
ZFAND1	3.3353e-63	0.193792	0.399	0.183	1.22075e-58
GNG12	3.57806e-63	0.229227	0.508	0.269	1.3096e-58
STEAP2	4.04261e-63	0.197061	0.318	0.114	1.47964e-58
NBEAL1	4.16878e-63	0.253273	0.456	0.229	1.52581e-58
PFKL	4.21236e-63	0.157552	0.482	0.256	1.54177e-58
CLIP1	4.84954e-63	0.39473	0.5	0.257	1.77498e-58
SLC4A7	5.162e-63	0.192746	0.285	0.091	1.88934e-58
SLMAP	5.42868e-63	0.247254	0.478	0.258	1.98695e-58
RALGPS2	5.54912e-63	0.358417	0.451	0.226	2.03103e-58
KDM3A	5.65146e-63	0.313132	0.372	0.163	2.06849e-58
AP2A2	6.15239e-63	0.207299	0.395	0.181	2.25184e-58
WDR43	7.20755e-63	0.203637	0.449	0.224	2.63804e-58
IGF2R	7.83007e-63	0.286684	0.464	0.236	2.86588e-58
MRPS7	8.27185e-63	0.116452	0.432	0.214	3.02758e-58
SUCLG1	8.35316e-63	0.235725	0.46	0.239	3.05734e-58
FLOT1	8.62881e-63	0.104024	0.557	0.314	3.15823e-58
SOX4	8.69742e-63	0.675328	0.678	0.382	3.18334e-58
HSPA9	8.83415e-63	0.0682932	0.601	0.348	3.23339e-58
HK2	9.6568e-63	0.308463	0.37	0.16	3.53448e-58
PDP1	1.00652e-62	0.236327	0.402	0.183	3.68395e-58
HNMT	1.02963e-62	0.173283	0.465	0.24	3.76854e-58
ANKIB1	1.13013e-62	0.159769	0.44	0.217	4.13637e-58
B3GNT5	1.14378e-62	0.25107	0.42	0.2	4.18633e-58
ABI2	1.14806e-62	0.184598	0.413	0.193	4.202e-58
TIPARP	1.2373e-62	0.328396	0.482	0.254	4.52863e-58
EPAS1	1.27204e-62	0.143618	0.438	0.219	4.65578e-58
CFAP36	1.3674e-62	0.202899	0.435	0.216	5.00482e-58
TNNT1	1.39169e-62	0.187318	0.305	0.111	5.09372e-58
TMEM144	1.57021e-62	0.229614	0.265	0.08	5.74713e-58
ABHD3	1.62502e-62	0.44866	0.378	0.177	5.94773e-58
RARS	1.75477e-62	0.210656	0.463	0.233	6.42264e-58
PKP1	1.78912e-62	-0.468606	0.057	0.204	6.54835e-58
PPP1R15A	1.79934e-62	0.399015	0.695	0.42	6.58576e-58
BARX2	1.84643e-62	0.129083	0.243	0.064	6.75813e-58
USP10	1.96527e-62	0.23574	0.405	0.19	7.19307e-58
UBE2I	1.98043e-62	0.080089	0.592	0.335	7.24859e-58
MRPL52	2.02476e-62	0.283042	0.596	0.344	7.41082e-58
H3F3A	2.12669e-62	-0.716575	0.874	0.758	7.7839e-58
LGR4	2.13464e-62	0.251826	0.38	0.171	7.813e-58
UBR2	2.47454e-62	0.326768	0.407	0.191	9.05707e-58
ANKHD1	2.61519e-62	0.331608	0.54	0.292	9.57187e-58
TMEM259	2.64259e-62	0.247556	0.535	0.286	9.67216e-58
SCFD1	2.95835e-62	0.193545	0.461	0.236	1.08279e-57
RNF5	3.12391e-62	0.111618	0.432	0.21	1.14338e-57
PDK4	3.20704e-62	0.932026	0.301	0.11	1.17381e-57
TKT	3.25244e-62	0.0218454	0.59	0.348	1.19043e-57
SLC20A2	3.26558e-62	0.252107	0.374	0.165	1.19523e-57
CHCHD7	3.35167e-62	0.0769329	0.46	0.225	1.22674e-57
DHX40	3.40416e-62	0.200851	0.358	0.151	1.24596e-57
RAI14	3.91727e-62	0.201659	0.357	0.148	1.43376e-57
PLPP2	3.93777e-62	0.276716	0.566	0.313	1.44126e-57
CD59	3.96175e-62	0.403983	0.851	0.555	1.45004e-57
B3GNT3	4.00918e-62	0.235296	0.466	0.238	1.4674e-57
EIF3H	4.4427e-62	0.122895	0.661	0.405	1.62607e-57
TMC4	5.65358e-62	0.327789	0.482	0.25	2.06927e-57
ERP44	5.664e-62	0.0792629	0.475	0.254	2.07308e-57
ANXA11	6.06222e-62	0.339892	0.703	0.42	2.21883e-57
SMARCA1	6.39208e-62	0.279079	0.284	0.095	2.33957e-57
HYOU1	6.51762e-62	0.144415	0.432	0.208	2.38551e-57
SMAD3	6.90474e-62	0.233824	0.436	0.215	2.5272e-57
CLK1	7.11016e-62	0.157188	0.487	0.254	2.60239e-57
C6orf132	7.23203e-62	0.348148	0.505	0.259	2.647e-57
PLA2G10	7.3692e-62	0.30005	0.312	0.113	2.6972e-57
MIDN	7.4496e-62	0.263249	0.622	0.354	2.72663e-57
NR1H2	7.48231e-62	0.0387403	0.431	0.212	2.7386e-57
ATP1A1	7.49135e-62	0.348507	0.76	0.45	2.74191e-57
FA2H	7.74143e-62	0.202259	0.33	0.129	2.83344e-57
SYS1	7.74665e-62	0.0644516	0.387	0.18	2.83535e-57
USP32	8.08613e-62	0.238397	0.273	0.088	2.9596e-57
BUD23	8.16164e-62	0.0314962	0.537	0.306	2.98724e-57
PRKCI	8.79413e-62	0.308942	0.479	0.26	3.21874e-57
FAM160A2	9.03855e-62	0.21842	0.325	0.124	3.3082e-57
DCP1A	1.00891e-61	0.139924	0.357	0.151	3.6927e-57
CEBPG	1.12537e-61	0.19007	0.438	0.22	4.11898e-57
FBLIM1	1.19878e-61	0.297039	0.464	0.238	4.38764e-57
PPP4R3B	1.35735e-61	0.184284	0.484	0.249	4.96803e-57
BHLHE40	1.36256e-61	0.217	0.622	0.351	4.98709e-57
DPH3	1.39355e-61	0.0321281	0.337	0.134	5.10052e-57
NMT2	1.49378e-61	0.131131	0.236	0.06	5.46738e-57
GAK	1.51066e-61	0.310286	0.458	0.235	5.52916e-57
ARPC1A	1.59013e-61	0.291425	0.559	0.336	5.82005e-57
MED16	1.60148e-61	0.227349	0.387	0.172	5.86157e-57
EXT1	1.66916e-61	0.251091	0.396	0.181	6.10929e-57
RPS6KA3	1.67033e-61	0.310529	0.489	0.255	6.11357e-57
TMEM9B	1.68442e-61	0.129201	0.415	0.202	6.16515e-57
RHPN2	1.78004e-61	0.218633	0.449	0.221	6.51514e-57
SELENOP	1.92712e-61	-0.156394	0.471	0.232	7.05346e-57
UBE2V2	1.96061e-61	0.152005	0.45	0.223	7.17603e-57
FAM49B	1.97219e-61	0.268341	0.517	0.297	7.21842e-57
AGPAT2	2.08968e-61	0.0802162	0.565	0.332	7.64844e-57
AFTPH	2.61495e-61	0.208296	0.453	0.228	9.57099e-57
DUSP3	2.82533e-61	0.173221	0.412	0.197	1.0341e-56
GALE	2.99969e-61	0.260426	0.452	0.234	1.09792e-56
FIS1	3.45575e-61	0.157218	0.609	0.393	1.26484e-56
TMEM87B	3.54765e-61	0.245691	0.456	0.238	1.29848e-56
SMIM31	3.74064e-61	0.210512	0.139	0.006	1.36911e-56
YIPF5	3.93644e-61	0.165362	0.467	0.238	1.44078e-56
ARHGAP5	4.20854e-61	0.230262	0.605	0.334	1.54037e-56
PICALM	4.22395e-61	0.191894	0.501	0.279	1.54601e-56
HERC4	4.26357e-61	0.390285	0.418	0.205	1.56051e-56
EXOC1	4.44874e-61	0.298467	0.454	0.229	1.62828e-56
SMG1	5.2971e-61	0.269263	0.579	0.314	1.93879e-56
IGHA1	5.79297e-61	-0.578081	0.104	0.278	2.12028e-56
COPB2	6.14847e-61	0.12855	0.534	0.295	2.2504e-56
RNF13	6.24682e-61	0.106453	0.445	0.228	2.2864e-56
IDS	6.45873e-61	0.193042	0.552	0.316	2.36396e-56
LYPD2	6.84762e-61	-1.00256	0.011	0.11	2.5063e-56
SERTAD2	7.00376e-61	0.1145	0.285	0.096	2.56345e-56
DDX24	7.21775e-61	0.211655	0.664	0.385	2.64177e-56
HNRNPUL2	7.24006e-61	0.165041	0.512	0.281	2.64994e-56
TNFRSF11A	7.44275e-61	0.220328	0.264	0.081	2.72412e-56
TMPRSS2	7.75061e-61	0.117856	0.381	0.17	2.8368e-56
ZFC3H1	7.96768e-61	0.329547	0.386	0.174	2.91625e-56
SLC16A5	8.02515e-61	0.096415	0.248	0.072	2.93729e-56
MAP3K2	8.03536e-61	0.228137	0.529	0.287	2.94102e-56
PSEN1	8.22403e-61	0.172017	0.436	0.215	3.01008e-56
CPT1A	8.49532e-61	0.13662	0.373	0.166	3.10937e-56
IMPACT	8.86849e-61	0.461399	0.362	0.171	3.24596e-56
ANKRD49	9.76117e-61	0.289172	0.298	0.108	3.57269e-56
FKBP4	1.05515e-60	0.0792375	0.479	0.249	3.86195e-56
ERBIN	1.1642e-60	0.34722	0.536	0.296	4.26109e-56
FRK	1.17506e-60	0.299303	0.358	0.156	4.30084e-56
ATP8B1	1.45017e-60	0.344952	0.44	0.219	5.30776e-56
TMEM33	1.53043e-60	0.164624	0.468	0.247	5.60154e-56
UBXN1	1.79205e-60	-0.04574	0.584	0.348	6.55908e-56
COL3A1	1.80432e-60	-1.40469	0.44	0.576	6.60399e-56
AC127526.5	1.83032e-60	0.136658	0.213	0.047	6.69917e-56
TLE5	1.94136e-60	0.208187	0.692	0.394	7.10555e-56
EIF3G	1.95267e-60	0.175856	0.636	0.376	7.14697e-56
CLNS1A	1.96719e-60	0.0238672	0.459	0.242	7.20012e-56
TRIP11	2.0724e-60	0.348535	0.534	0.287	7.58518e-56
MYO1D	2.15671e-60	0.0578059	0.446	0.229	7.89376e-56
ZC3H15	2.17083e-60	0.238368	0.596	0.338	7.94545e-56
NSF	2.17119e-60	0.229776	0.404	0.184	7.94678e-56
FAM114A1	2.24038e-60	0.223907	0.458	0.239	8.2e-56
LARP7	2.55468e-60	0.172456	0.463	0.234	9.35038e-56
ROCK1	2.72622e-60	0.30425	0.597	0.338	9.97823e-56
THAP9-AS1	2.78546e-60	0.135182	0.35	0.147	1.01951e-55
CCT2	3.02343e-60	0.0747763	0.491	0.266	1.1066e-55
ARFIP2	3.31978e-60	0.0699052	0.338	0.139	1.21507e-55
ACTR2	3.42249e-60	0.17209	0.675	0.39	1.25266e-55
PNRC2	3.51507e-60	0.170354	0.496	0.27	1.28655e-55
SFT2D1	4.46126e-60	0.0918282	0.494	0.271	1.63287e-55
METTL26	4.52161e-60	0.033199	0.506	0.284	1.65496e-55
CAMK2D	4.63185e-60	0.145884	0.41	0.2	1.6953e-55
AOC1	4.79243e-60	0.328339	0.404	0.191	1.75408e-55
TOX3	5.18355e-60	0.273319	0.369	0.156	1.89723e-55
ARFGAP3	5.85427e-60	0.228037	0.478	0.257	2.14272e-55
CAT	6.28226e-60	0.166281	0.372	0.164	2.29937e-55
TMEM208	6.34059e-60	0.0626211	0.538	0.309	2.32072e-55
IWS1	6.65959e-60	0.323441	0.483	0.248	2.43748e-55
ITGB8	6.834e-60	0.697911	0.477	0.256	2.50131e-55
ERICH5	7.59499e-60	0.333729	0.202	0.042	2.77984e-55
ELOVL7	7.93466e-60	0.188224	0.199	0.04	2.90417e-55
COPS6	8.75352e-60	0.14314	0.506	0.286	3.20388e-55
RPF2	8.87679e-60	0.220965	0.366	0.166	3.249e-55
UST	9.89578e-60	0.127787	0.156	0.015	3.62195e-55
SMAD5	1.00292e-59	0.215719	0.432	0.219	3.67079e-55
ANKRD17	1.02051e-59	0.182574	0.473	0.243	3.73517e-55
PELI2	1.03418e-59	0.162449	0.237	0.063	3.7852e-55
SLC39A14	1.04579e-59	0.10053	0.353	0.15	3.82769e-55
AP1S3	1.08136e-59	0.260193	0.399	0.189	3.95788e-55
FAM234A	1.09854e-59	0.16062	0.404	0.192	4.02077e-55
TRA2A	1.10411e-59	0.165313	0.494	0.265	4.04117e-55
TCAIM	1.12731e-59	0.124628	0.288	0.099	4.12606e-55
PYCARD	1.17606e-59	0.108422	0.462	0.239	4.30452e-55
SHMT2	1.18945e-59	0.25569	0.306	0.115	4.35351e-55
CCZ1	1.28521e-59	0.246424	0.371	0.165	4.704e-55
NSA2	1.28856e-59	0.18555	0.593	0.345	4.71625e-55
LINC00923	1.37609e-59	0.338428	0.135	0.005	5.03662e-55
CORO2A	1.44322e-59	0.418397	0.463	0.247	5.28234e-55
FTSJ3	1.48777e-59	0.203295	0.287	0.101	5.4454e-55
LONP1	1.59945e-59	0.260748	0.355	0.153	5.85415e-55
PSMD1	1.71294e-59	0.181633	0.535	0.296	6.26954e-55
LRRC58	2.02551e-59	0.260332	0.424	0.208	7.41358e-55
ZNF148	2.37523e-59	0.197835	0.485	0.262	8.69356e-55
CCDC186	2.47938e-59	0.311732	0.549	0.309	9.07478e-55
CHMP1A	2.64614e-59	0.132248	0.474	0.25	9.68512e-55
ZNF608	2.67397e-59	0.446069	0.329	0.134	9.787e-55
INO80D	2.6768e-59	0.276522	0.413	0.198	9.79734e-55
DCAF5	2.78983e-59	0.303234	0.386	0.185	1.0211e-54
RERE	2.98427e-59	0.170973	0.481	0.252	1.09227e-54
CYTH1	3.01781e-59	0.208185	0.438	0.217	1.10455e-54
HSPA5	3.414e-59	0.254637	0.757	0.478	1.24956e-54
SLC38A2	3.86263e-59	0.0357056	0.57	0.323	1.41376e-54
NDUFS8	4.02266e-59	0.137355	0.546	0.302	1.47233e-54
TSC22D4	4.13306e-59	0.240819	0.417	0.209	1.51274e-54
ELMO3	4.23465e-59	0.21633	0.359	0.155	1.54993e-54
REEP6	4.33763e-59	0.258006	0.234	0.065	1.58761e-54
SESTD1	4.43106e-59	0.495154	0.452	0.246	1.62181e-54
NSRP1	4.58806e-59	0.260845	0.496	0.265	1.67928e-54
AGPAT1	4.65533e-59	0.245571	0.426	0.213	1.7039e-54
PRRG4	4.95715e-59	0.323078	0.414	0.201	1.81437e-54
ITPRIPL2	5.44871e-59	0.329733	0.493	0.262	1.99428e-54
KRT5	5.47435e-59	-1.19856	0.014	0.115	2.00367e-54
UACA	6.38468e-59	0.229942	0.491	0.26	2.33686e-54
ATG12	6.57999e-59	0.172283	0.475	0.249	2.40834e-54
GOSR1	6.7997e-59	0.0524595	0.429	0.213	2.48876e-54
EIF3B	7.6329e-59	0.154827	0.514	0.283	2.79372e-54
HMGN1	7.76979e-59	0.177065	0.694	0.414	2.84382e-54
NEB	7.89648e-59	0.2838	0.159	0.018	2.89019e-54
METTL7B	7.95076e-59	0.158851	0.194	0.038	2.91006e-54
YIF1A	8.11718e-59	0.0580923	0.483	0.265	2.97097e-54
SAT1	9.69708e-59	0.431465	0.871	0.572	3.54923e-54
NCL	1.02751e-58	0.306422	0.769	0.459	3.76078e-54
ENO1	1.16401e-58	0.25891	0.741	0.452	4.26041e-54
CMIP	1.19536e-58	0.18466	0.471	0.249	4.37513e-54
GLG1	1.24487e-58	0.103407	0.559	0.317	4.55633e-54
CDCP1	1.36013e-58	0.274812	0.497	0.284	4.97821e-54
HNRNPH3	1.40001e-58	0.100498	0.556	0.32	5.12418e-54
TMCO3	1.48751e-58	0.248706	0.451	0.236	5.44445e-54
IL17RB	1.78459e-58	0.229854	0.168	0.024	6.53177e-54
PLEKHA1	1.89042e-58	0.194613	0.518	0.292	6.91914e-54
SYNGR2	1.98019e-58	0.122039	0.628	0.351	7.24771e-54
TMEM8A	1.99853e-58	0.147692	0.405	0.196	7.31483e-54
RBCK1	2.05703e-58	0.0781653	0.474	0.253	7.52894e-54
GSE1	2.09291e-58	0.271359	0.357	0.155	7.66024e-54
CBR1	2.24765e-58	0.246028	0.44	0.222	8.22662e-54
ZBTB43	2.25575e-58	0.22188	0.391	0.183	8.25626e-54
POLR2J3	2.3127e-58	0.471509	0.49	0.261	8.46473e-54
TCEA1	2.54422e-58	0.217178	0.623	0.354	9.31209e-54
TMPRSS4	2.55643e-58	0.24339	0.591	0.332	9.35678e-54
GSK3B	2.72115e-58	0.30237	0.423	0.209	9.95967e-54
PWWP3A	2.74881e-58	0.322979	0.388	0.181	1.00609e-53
PIGG	2.79408e-58	0.245162	0.29	0.104	1.02266e-53
DDB1	2.83071e-58	0.148841	0.48	0.256	1.03607e-53
G3BP2	2.86165e-58	0.0801632	0.552	0.317	1.04739e-53
MPHOSPH8	2.935e-58	0.290582	0.584	0.32	1.07424e-53
ST5	2.95584e-58	0.216314	0.334	0.136	1.08187e-53
HNF4G	2.98104e-58	0.206733	0.279	0.098	1.09109e-53
XRCC4	3.086e-58	0.399766	0.301	0.119	1.12951e-53
PCBP2	3.23566e-58	-0.032528	0.656	0.392	1.18428e-53
PPID	3.46046e-58	0.187688	0.352	0.153	1.26656e-53
SAFB2	3.51081e-58	0.263373	0.464	0.239	1.28499e-53
PTP4A2	3.59909e-58	0.190772	0.678	0.396	1.3173e-53
EBLN3P	3.90367e-58	0.215271	0.429	0.224	1.42878e-53
GPATCH2L	4.02199e-58	0.321531	0.386	0.177	1.47209e-53
CEACAM6	4.33332e-58	0.634601	0.676	0.408	1.58604e-53
SH3YL1	4.44116e-58	0.193106	0.566	0.307	1.62551e-53
SNHG6	5.28568e-58	0.265718	0.669	0.437	1.93461e-53
PUM1	5.31268e-58	0.164819	0.56	0.312	1.94449e-53
MRPL38	6.26258e-58	0.134386	0.365	0.166	2.29217e-53
KCNQ1OT1	7.04445e-58	0.233578	0.557	0.301	2.57834e-53
FBXO2	7.29947e-58	0.100665	0.242	0.069	2.67168e-53
GGNBP2	7.3396e-58	0.187771	0.513	0.284	2.68637e-53
MICAL1	7.34791e-58	0.179688	0.206	0.045	2.68941e-53
ZNF827	7.39042e-58	0.284773	0.33	0.138	2.70497e-53
PPIL4	7.50939e-58	0.218129	0.377	0.174	2.74851e-53
UBALD2	7.63348e-58	0.189613	0.582	0.333	2.79393e-53
PSORS1C1	8.13897e-58	0.181655	0.257	0.081	2.97895e-53
SBF2	8.19978e-58	0.173071	0.321	0.127	3.0012e-53
CDC40	8.48383e-58	0.206727	0.366	0.165	3.10517e-53
HMGN4	8.65498e-58	0.0622599	0.396	0.191	3.16781e-53
TMEM184A	9.06628e-58	0.247846	0.277	0.095	3.31835e-53
PRSS1	9.11804e-58	0.692166	0.136	0.007	3.3373e-53
POLR2C	9.57868e-58	0.0751738	0.402	0.195	3.50589e-53
SUN1	9.95844e-58	0.251542	0.549	0.319	3.64489e-53
PPP1R12A	1.01736e-57	0.16661	0.498	0.27	3.72363e-53
PPP1CA	1.08165e-57	0.18177	0.56	0.315	3.95893e-53
FAR1	1.11921e-57	0.174727	0.435	0.219	4.09643e-53
PPP6R3	1.17314e-57	0.0567854	0.453	0.231	4.29381e-53
SNRK	1.17321e-57	0.175633	0.324	0.13	4.29407e-53
ATF7IP2	1.19712e-57	0.21677	0.31	0.119	4.38156e-53
WTAP	1.30277e-57	0.0135268	0.485	0.262	4.76825e-53
CDC42BPB	1.48638e-57	0.245419	0.541	0.301	5.4403e-53
PDIA6	1.53937e-57	0.127682	0.681	0.42	5.63425e-53
NMNAT2	1.54295e-57	0.155413	0.15	0.015	5.64735e-53
KRBOX1	1.70192e-57	0.0275256	0.144	0.011	6.2292e-53
GTPBP4	1.77859e-57	0.235197	0.43	0.221	6.50983e-53
CEBPZOS	1.84325e-57	0.166848	0.386	0.182	6.74647e-53
ASH1L	2.15823e-57	0.237031	0.604	0.337	7.89935e-53
EWSR1	2.15868e-57	0.0777778	0.526	0.292	7.90098e-53
RALGAPA2	2.1605e-57	0.426606	0.394	0.19	7.90766e-53
KCNQ1	2.24102e-57	-0.016838	0.262	0.081	8.20236e-53
GNL1	3.28648e-57	0.161301	0.394	0.187	1.20288e-52
PAPOLA	3.55027e-57	0.0788475	0.63	0.369	1.29943e-52
ANP32B	3.70855e-57	0.163523	0.64	0.371	1.35737e-52
NABP1	3.97509e-57	0.148384	0.327	0.129	1.45492e-52
GPBP1	4.13409e-57	0.253293	0.557	0.316	1.51312e-52
PPP1R11	4.41922e-57	0.171123	0.459	0.243	1.61748e-52
NFIC	4.57809e-57	0.149654	0.463	0.238	1.67563e-52
PRKAA2	4.59476e-57	0.143822	0.279	0.096	1.68173e-52
GABRA2	4.71972e-57	0.333295	0.12	0.001	1.72746e-52
ANKRD36C	4.74943e-57	0.519396	0.447	0.232	1.73834e-52
RBM33	4.75932e-57	0.173918	0.481	0.257	1.74196e-52
PDZD8	5.12859e-57	0.310153	0.574	0.315	1.87711e-52
CBX4	5.49537e-57	0.219613	0.354	0.157	2.01136e-52
ARL5B	5.89377e-57	0.174791	0.386	0.177	2.15718e-52
GDI2	6.05084e-57	0.0513108	0.576	0.338	2.21467e-52
ERLEC1	6.44238e-57	0.0752553	0.506	0.279	2.35797e-52
ALDH2	6.69672e-57	0.128388	0.497	0.273	2.45107e-52
RPS18	7.04337e-57	-0.387902	0.97	0.963	2.57794e-52
HOOK3	7.0992e-57	0.182482	0.453	0.233	2.59838e-52
OXSR1	7.25011e-57	0.117869	0.404	0.197	2.65361e-52
ZFAND3	7.39978e-57	0.174657	0.397	0.193	2.70839e-52
CRYZ	7.86829e-57	0.268465	0.366	0.169	2.87987e-52
EIF2AK1	8.12631e-57	0.186713	0.5	0.273	2.97431e-52
ST13	8.20939e-57	0.0824909	0.631	0.372	3.00472e-52
TSC22D2	8.24217e-57	0.085697	0.383	0.18	3.01671e-52
ACLY	8.49784e-57	0.18668	0.406	0.199	3.1103e-52
HHLA2	8.70115e-57	0.241856	0.19	0.039	3.18471e-52
RNF114	9.01078e-57	0.0418918	0.469	0.251	3.29804e-52
GLS	9.53232e-57	0.130929	0.477	0.25	3.48893e-52
TESK1	9.94925e-57	0.456163	0.31	0.128	3.64153e-52
SDC1	1.01954e-56	0.149805	0.591	0.33	3.7316e-52
SP100	1.02304e-56	0.199886	0.553	0.314	3.74444e-52
NMD3	1.04516e-56	0.131811	0.395	0.194	3.82538e-52
EIF4E	1.06401e-56	0.0653922	0.425	0.211	3.89438e-52
GORASP2	1.09364e-56	0.121392	0.465	0.25	4.00282e-52
CAPZB	1.09906e-56	0.117319	0.616	0.36	4.02267e-52
GSTA1	1.12678e-56	0.400902	0.133	0.007	4.12413e-52
NGRN	1.15972e-56	0.113788	0.495	0.27	4.24469e-52
MCU	1.17708e-56	0.218258	0.416	0.209	4.30824e-52
TUT4	1.33356e-56	0.304263	0.389	0.181	4.88096e-52
SF1	1.34542e-56	0.131551	0.601	0.354	4.92436e-52
BCL6	1.37047e-56	0.190418	0.292	0.108	5.01606e-52
GPAT4	1.39032e-56	0.0996931	0.313	0.12	5.08869e-52
ANO6	1.45894e-56	0.11558	0.4	0.193	5.33988e-52
SLC16A7	1.56701e-56	0.194513	0.267	0.089	5.7354e-52
CCDC50	1.57024e-56	0.229098	0.51	0.275	5.74723e-52
RAB3B	1.57384e-56	0.246095	0.179	0.032	5.76043e-52
RELA	1.68674e-56	0.0791202	0.434	0.225	6.17364e-52
JMJD6	1.74667e-56	0.0803052	0.312	0.121	6.39299e-52
SLC39A5	1.81961e-56	0.177352	0.12	0.001	6.65996e-52
VPS13B	2.03294e-56	0.333042	0.32	0.131	7.44075e-52
PACSIN2	2.10516e-56	0.201201	0.44	0.223	7.7051e-52
OSBP	2.18651e-56	0.0825544	0.424	0.213	8.00283e-52
ACBD5	2.27159e-56	0.111468	0.397	0.192	8.31426e-52
CDK10	2.28594e-56	0.190795	0.386	0.182	8.36677e-52
OXA1L	2.54558e-56	0.169707	0.41	0.203	9.31707e-52
LRRFIP2	2.69294e-56	0.234587	0.397	0.194	9.85643e-52
CTSC	2.9406e-56	0.164098	0.577	0.335	1.07629e-51
SUCLG2	3.14239e-56	0.254119	0.455	0.245	1.15014e-51
TARDBP	3.27038e-56	0.142169	0.471	0.247	1.19699e-51
RALA	3.28871e-56	0.211691	0.51	0.289	1.2037e-51
DNAJA2	3.42212e-56	0.116276	0.508	0.28	1.25253e-51
MIB1	3.46251e-56	0.230037	0.42	0.212	1.26731e-51
ARL8B	3.5119e-56	0.107232	0.429	0.216	1.28539e-51
CCT6A	3.51385e-56	0.153929	0.575	0.335	1.2861e-51
RIF1	3.59868e-56	0.217051	0.533	0.297	1.31715e-51
METAP2	3.67214e-56	0.236035	0.578	0.329	1.34404e-51
CCDC144A	4.09144e-56	0.473479	0.153	0.018	1.49751e-51
LRIG3	4.31043e-56	0.395501	0.304	0.121	1.57766e-51
TRIM2	5.11976e-56	0.152252	0.432	0.226	1.87388e-51
SNRPD1	5.20508e-56	0.372935	0.574	0.352	1.90511e-51
GLOD4	5.23068e-56	0.0697607	0.37	0.168	1.91448e-51
KCNK1	5.27349e-56	0.249484	0.553	0.314	1.93015e-51
AARS	5.37251e-56	0.170297	0.335	0.142	1.96639e-51
ABI3BP	5.39651e-56	0.194946	0.149	0.015	1.97518e-51
FAM162A	5.44977e-56	0.137859	0.498	0.284	1.99467e-51
TMEM141	5.56067e-56	0.0812549	0.541	0.316	2.03526e-51
AC021218.1	5.56798e-56	0.135389	0.135	0.009	2.03794e-51
EBAG9	5.59531e-56	0.191935	0.406	0.201	2.04794e-51
ENY2	6.58562e-56	0.0709599	0.631	0.366	2.4104e-51
NPIPB11	6.59053e-56	0.354933	0.154	0.019	2.4122e-51
PPP1R9A	6.60508e-56	0.307967	0.362	0.159	2.41753e-51
TAX1BP3	6.67306e-56	-0.0215717	0.441	0.231	2.44241e-51
PLAC8	6.94612e-56	0.337723	0.46	0.247	2.54235e-51
SRI	7.63249e-56	0.174875	0.611	0.375	2.79357e-51
LAMTOR1	7.9075e-56	0.105062	0.51	0.278	2.89422e-51
APRT	8.37614e-56	0.173264	0.624	0.377	3.06575e-51
PPP1R15B	8.78968e-56	0.154322	0.505	0.279	3.21711e-51
COL1A2	8.93141e-56	-1.20185	0.548	0.642	3.26899e-51
ZHX1	1.00353e-55	0.154162	0.376	0.179	3.67303e-51
XPO1	1.04518e-55	0.147322	0.542	0.307	3.82548e-51
SMIM20	1.09364e-55	0.054637	0.351	0.151	4.00282e-51
PDCD10	1.16908e-55	0.113006	0.519	0.298	4.27895e-51
GAMT	1.2976e-55	0.260994	0.201	0.047	4.74934e-51
SAMD5	1.31461e-55	0.180953	0.147	0.015	4.81159e-51
AL121761.1	1.34581e-55	1.04224	0.24	0.076	4.92581e-51
PRKAR2A	1.44367e-55	0.231112	0.424	0.22	5.28397e-51
LYPLA1	1.47913e-55	0.200987	0.518	0.292	5.41375e-51
SRP54	1.50971e-55	0.16528	0.482	0.26	5.52568e-51
DYNLT1	1.68064e-55	0.0961269	0.57	0.339	6.15133e-51
STX4	1.70379e-55	0.113088	0.435	0.222	6.23603e-51
NFX1	1.81569e-55	0.311225	0.348	0.154	6.64561e-51
NR1I2	1.85802e-55	0.178582	0.149	0.017	6.80053e-51
SCAND1	2.00304e-55	0.0194311	0.589	0.348	7.33134e-51
TSG101	2.00315e-55	0.0285579	0.497	0.285	7.33173e-51
NCBP2	2.32437e-55	0.04585	0.457	0.243	8.50743e-51
RFK	2.38079e-55	0.250211	0.396	0.191	8.71392e-51
TNIK	2.54852e-55	0.222207	0.401	0.192	9.32785e-51
ZC3H18	2.7443e-55	0.265113	0.42	0.209	1.00444e-50
ARMCX3	2.80842e-55	0.165699	0.45	0.237	1.02791e-50
LINC01612	2.83545e-55	0.164071	0.123	0.004	1.0378e-50
BCL10	2.84032e-55	0.214243	0.467	0.246	1.03959e-50
DNAJB14	2.97559e-55	0.167534	0.438	0.222	1.0891e-50
SPPL2B	3.0741e-55	0.302598	0.359	0.162	1.12515e-50
QSOX1	3.22328e-55	0.156385	0.639	0.37	1.17975e-50
ALAS1	3.36765e-55	0.198466	0.33	0.142	1.23259e-50
CLDN12	3.76414e-55	0.248803	0.367	0.17	1.37771e-50
UBE2Z	3.81949e-55	0.158327	0.497	0.269	1.39797e-50
DHRS3	4.0125e-55	0.188071	0.46	0.248	1.46862e-50
OSBPL9	4.02093e-55	0.137801	0.418	0.209	1.4717e-50
ZFPL1	4.42511e-55	0.148194	0.334	0.14	1.61963e-50
CRACR2B	4.44018e-55	0.166582	0.334	0.142	1.62515e-50
GGT7	4.50117e-55	0.121841	0.245	0.074	1.64747e-50
MARK2	4.59788e-55	0.199137	0.461	0.244	1.68287e-50
FNTA	4.7653e-55	0.0456349	0.399	0.193	1.74415e-50
SRP68	5.02895e-55	0.136575	0.376	0.175	1.84065e-50
RFC1	5.21716e-55	0.295041	0.472	0.248	1.90953e-50
KMT5B	5.22261e-55	0.156062	0.421	0.214	1.91153e-50
APPL1	5.22662e-55	0.186423	0.413	0.212	1.91299e-50
MAP4K3-DT	5.42688e-55	0.257421	0.361	0.165	1.98629e-50
AMFR	5.59743e-55	0.112427	0.391	0.189	2.04872e-50
MYC	5.61325e-55	0.103274	0.311	0.125	2.0545e-50
CAST	5.77719e-55	0.205388	0.765	0.427	2.11451e-50
RPL37A	5.8021e-55	-0.446805	0.926	0.905	2.12363e-50
PRKCD	6.00198e-55	0.130915	0.329	0.138	2.19679e-50
PSMB8	6.05993e-55	0.10326	0.595	0.331	2.218e-50
PHYH	6.32579e-55	0.142595	0.284	0.104	2.3153e-50
ESF1	7.86771e-55	0.309998	0.434	0.223	2.87966e-50
CHD1	8.80815e-55	0.282795	0.465	0.249	3.22387e-50
RDX	9.30917e-55	0.107445	0.421	0.198	3.40725e-50
GPRIN3	9.71327e-55	0.100234	0.169	0.026	3.55516e-50
LINC-PINT	1.00126e-54	0.166092	0.398	0.188	3.66471e-50
SELENOT	1.08531e-54	0.0749918	0.529	0.311	3.97233e-50
HNRNPU	1.08702e-54	0.269392	0.768	0.44	3.97861e-50
ITGA3	1.09491e-54	0.0457889	0.627	0.356	4.00747e-50
MTMR4	1.11464e-54	0.155363	0.213	0.055	4.0797e-50
CSTB	1.1431e-54	0.0934823	0.871	0.626	4.18386e-50
PPP1R21	1.19095e-54	0.175404	0.275	0.097	4.35901e-50
MAGT1	1.24559e-54	0.101249	0.487	0.26	4.55898e-50
TRPS1	1.4668e-54	0.137706	0.31	0.122	5.36863e-50
IRF1	1.53681e-54	0.211961	0.456	0.241	5.62488e-50
TRIQK	1.55177e-54	0.199283	0.369	0.173	5.67964e-50
CYCS	1.66613e-54	-0.0654546	0.62	0.388	6.0982e-50
SH2D3A	1.70171e-54	0.262768	0.408	0.2	6.22844e-50
LRIF1	1.70634e-54	0.213947	0.311	0.127	6.24537e-50
CASK	1.9668e-54	0.135984	0.417	0.211	7.19868e-50
UBXN6	2.07501e-54	0.213061	0.433	0.221	7.59476e-50
TRAPPC4	2.42617e-54	0.0731804	0.387	0.19	8.88003e-50
TRHDE	2.563e-54	0.212319	0.119	0.003	9.38082e-50
RNF139	3.10673e-54	0.161102	0.341	0.154	1.13709e-49
UTP23	3.1487e-54	0.0656813	0.342	0.147	1.15245e-49
UBA6	3.20618e-54	0.23005	0.45	0.234	1.1735e-49
RNF38	3.4172e-54	0.244316	0.325	0.139	1.25073e-49
UNC13D	3.75894e-54	0.238026	0.271	0.095	1.37581e-49
CCNT1	3.87094e-54	0.0706179	0.313	0.124	1.4168e-49
CDC42BPA	4.26414e-54	0.180361	0.511	0.281	1.56072e-49
KDM2A	4.98918e-54	0.193062	0.484	0.261	1.82609e-49
METTL7A	5.5711e-54	0.163934	0.284	0.105	2.03908e-49
SLC12A7	6.2346e-54	0.271395	0.409	0.203	2.28193e-49
CCNB1IP1	6.50027e-54	0.179866	0.351	0.162	2.37916e-49
SRRM1	6.53364e-54	0.217081	0.613	0.357	2.39138e-49
EEA1	6.66245e-54	0.218224	0.38	0.182	2.43852e-49
PHF14	6.80958e-54	0.248519	0.519	0.286	2.49237e-49
RHOF	7.07045e-54	0.11097	0.293	0.113	2.58786e-49
SMARCD2	7.25223e-54	0.167855	0.361	0.168	2.65439e-49
ROMO1	7.258e-54	0.0347586	0.637	0.389	2.6565e-49
COL9A2	7.71267e-54	0.30255	0.177	0.035	2.82292e-49
BRD2	8.0047e-54	0.145644	0.59	0.359	2.9298e-49
C11orf49	8.16116e-54	0.211524	0.281	0.103	2.98706e-49
TAF15	8.34717e-54	0.196028	0.484	0.265	3.05515e-49
NT5E	8.46921e-54	0.0626649	0.27	0.094	3.09982e-49
WWP1	8.56475e-54	0.274968	0.512	0.273	3.13478e-49
NAPA	9.30443e-54	0.11789	0.468	0.254	3.40552e-49
ATP6V1G1	1.04711e-53	0.153903	0.649	0.384	3.83252e-49
TNFSF13	1.04941e-53	0.200183	0.343	0.151	3.84095e-49
DDR1	1.05757e-53	0.02835	0.608	0.363	3.87081e-49
TADA3	1.08197e-53	0.0371586	0.37	0.178	3.9601e-49
DCTN2	1.13829e-53	0.162894	0.426	0.224	4.16626e-49
TBC1D5	1.17754e-53	0.144782	0.322	0.134	4.30991e-49
KDM6B	1.23745e-53	0.198445	0.36	0.162	4.52919e-49
BDP1	1.25048e-53	0.362916	0.5	0.273	4.5769e-49
DDX6	1.26265e-53	0.154094	0.516	0.29	4.62143e-49
COMTD1	1.2846e-53	0.179314	0.462	0.249	4.70177e-49
RWDD1	1.29661e-53	0.119037	0.51	0.291	4.74572e-49
COA4	1.34512e-53	0.0598679	0.474	0.258	4.92328e-49
SYNCRIP	1.55568e-53	0.14563	0.565	0.327	5.69395e-49
CCDC57	1.60693e-53	0.210763	0.314	0.131	5.88153e-49
EIF3A	1.60824e-53	0.31143	0.693	0.394	5.88634e-49
LRPPRC	1.82519e-53	0.179402	0.466	0.251	6.68036e-49
CYP51A1	1.84782e-53	0.188562	0.512	0.292	6.76321e-49
GPR35	1.8492e-53	0.263264	0.331	0.142	6.76825e-49
FAM177A1	2.09337e-53	0.125014	0.573	0.34	7.66193e-49
ATP6V0D1	2.10364e-53	0.111251	0.466	0.249	7.69952e-49
MFF	2.21572e-53	0.120412	0.433	0.225	8.10975e-49
NUDCD3	2.24562e-53	0.203503	0.417	0.211	8.21918e-49
CLDN7	2.31553e-53	0.101394	0.684	0.394	8.47507e-49
VCL	2.69358e-53	0.048276	0.594	0.334	9.85877e-49
AP3S1	2.87857e-53	0.0643089	0.433	0.231	1.05359e-48
TSPAN15	3.08713e-53	0.196493	0.437	0.232	1.12992e-48
NT5C	3.3384e-53	0.0650009	0.474	0.259	1.22189e-48
NEMF	3.39308e-53	0.300445	0.479	0.256	1.2419e-48
NFKBIA	3.46937e-53	0.26161	0.67	0.413	1.26982e-48
RRP8	3.49864e-53	0.144122	0.265	0.091	1.28054e-48
CSNK1A1	3.99433e-53	0.182867	0.673	0.393	1.46197e-48
DYNC1LI1	3.99589e-53	0.127467	0.411	0.21	1.46254e-48
ZCRB1	4.14674e-53	0.13104	0.477	0.268	1.51775e-48
PHC3	4.40919e-53	0.161464	0.379	0.181	1.61381e-48
PCMT1	4.53078e-53	0.030701	0.459	0.251	1.65831e-48
MED1	4.64871e-53	0.171869	0.395	0.197	1.70147e-48
SEC16A	4.69802e-53	0.145493	0.406	0.203	1.71952e-48
ATP11A	4.84534e-53	0.218056	0.494	0.278	1.77344e-48
UGT2A3	4.92193e-53	0.313416	0.114	0.002	1.80147e-48
BAG4	5.00607e-53	0.0501256	0.293	0.116	1.83227e-48
ARPC4	5.01433e-53	0.0175432	0.532	0.321	1.8353e-48
CIRBP	5.04308e-53	-0.0319142	0.628	0.376	1.84582e-48
ABCD3	5.71045e-53	0.21067	0.363	0.172	2.09008e-48
EIF1B	6.1927e-53	0.0378298	0.487	0.279	2.26659e-48
GIGYF2	6.21198e-53	0.30004	0.453	0.24	2.27365e-48
VTA1	6.3509e-53	0.16745	0.347	0.155	2.32449e-48
CEP126	6.73474e-53	0.226788	0.225	0.065	2.46498e-48
LAMC2	6.91779e-53	0.411572	0.638	0.368	2.53198e-48
KIN	7.07717e-53	0.209573	0.335	0.15	2.59031e-48
PDXDC1	7.22373e-53	0.0839765	0.568	0.31	2.64396e-48
TMBIM6	7.25611e-53	0.226044	0.814	0.553	2.65581e-48
KIF3B	7.50026e-53	0.225109	0.472	0.255	2.74517e-48
ABHD17C	7.508e-53	0.162534	0.474	0.27	2.748e-48
VPS41	7.81246e-53	0.16869	0.427	0.217	2.85944e-48
H1F0	8.12152e-53	0.197939	0.472	0.263	2.97256e-48
HSPD1	8.21772e-53	0.0273749	0.697	0.456	3.00777e-48
TRIM4	8.30281e-53	0.17477	0.289	0.111	3.03891e-48
NDUFS1	9.33476e-53	0.130016	0.463	0.256	3.41662e-48
PRKCSH	9.38373e-53	0.0934817	0.55	0.312	3.43454e-48
BECN1	9.685e-53	0.187626	0.432	0.231	3.54481e-48
CCN6	9.94484e-53	0.11567	0.114	0.002	3.63991e-48
YTHDF3	1.00939e-52	0.0861176	0.427	0.219	3.69446e-48
NCOA2	1.01103e-52	0.23338	0.418	0.214	3.70048e-48
GPS1	1.01973e-52	0.19984	0.35	0.158	3.73232e-48
EVI5	1.02965e-52	0.229242	0.35	0.163	3.76864e-48
DNAJC3	1.05007e-52	0.147106	0.555	0.313	3.84335e-48
MTHFD2	1.22272e-52	0.138778	0.333	0.144	4.47528e-48
SERINC3	1.26968e-52	0.0484273	0.58	0.352	4.64714e-48
ZNF654	1.27317e-52	0.223865	0.262	0.09	4.65992e-48
CXXC5	1.30765e-52	0.158996	0.503	0.267	4.78612e-48
NARS	1.34565e-52	0.314525	0.501	0.277	4.92523e-48
SAMD8	1.52095e-52	0.123101	0.299	0.12	5.56684e-48
NUDT9	1.56417e-52	0.0848598	0.327	0.139	5.72503e-48
SYVN1	1.66285e-52	0.11061	0.332	0.143	6.08619e-48
AATF	1.70993e-52	0.123703	0.429	0.222	6.25851e-48
SELENOS	1.9496e-52	0.146545	0.604	0.357	7.13575e-48
MED13L	2.01264e-52	0.12203	0.417	0.21	7.36645e-48
RPL10	2.03338e-52	-0.449962	0.954	0.938	7.44237e-48
ATF4	2.05467e-52	-0.0267386	0.645	0.392	7.52029e-48
CHORDC1	2.08661e-52	0.0944876	0.378	0.183	7.63719e-48
MPC2	2.09143e-52	0.232762	0.537	0.322	7.65484e-48
AHSA1	2.09671e-52	-0.0354429	0.492	0.277	7.67417e-48
NIPBL	2.30658e-52	0.246675	0.544	0.309	8.44232e-48
CPNE1	2.38768e-52	-0.0189607	0.492	0.281	8.73913e-48
NUTF2	2.38807e-52	0.0520282	0.435	0.234	8.74058e-48
ILK	2.40668e-52	-0.0627142	0.437	0.232	8.8087e-48
TMEM106B	2.45496e-52	0.192257	0.482	0.266	8.98539e-48
CNPPD1	2.46094e-52	0.140603	0.364	0.17	9.00727e-48
IKBKB	2.51108e-52	0.204884	0.322	0.136	9.19079e-48
UBE2L6	2.7911e-52	0.0532135	0.363	0.164	1.02157e-47
MTPN	2.90789e-52	0.145674	0.573	0.341	1.06432e-47
TMEM51	3.01255e-52	0.194157	0.336	0.151	1.10262e-47
NUS1	3.14912e-52	0.158419	0.364	0.171	1.15261e-47
DIDO1	3.16351e-52	0.202675	0.399	0.199	1.15788e-47
ARIH2	3.44117e-52	0.197894	0.363	0.171	1.2595e-47
FAM126B	3.75683e-52	0.150785	0.377	0.181	1.37504e-47
BRMS1	4.15343e-52	0.240287	0.373	0.18	1.5202e-47
DDX5	4.22922e-52	0.209738	0.802	0.521	1.54794e-47
ZBTB20	4.26136e-52	0.45828	0.471	0.27	1.5597e-47
KCNK15	4.44737e-52	0.0114535	0.168	0.029	1.62778e-47
FUT3	4.54174e-52	0.267257	0.391	0.194	1.66232e-47
FIP1L1	5.06316e-52	0.209537	0.403	0.201	1.85317e-47
FAM120A	5.88824e-52	0.190422	0.599	0.345	2.15516e-47
GNPNAT1	6.2871e-52	0.205481	0.375	0.185	2.30114e-47
TMED9	6.28755e-52	0.0321092	0.624	0.381	2.30131e-47
ZC3H13	6.65449e-52	0.288524	0.55	0.301	2.43561e-47
AFAP1-AS1	7.01446e-52	0.0856483	0.289	0.108	2.56736e-47
CACFD1	7.09245e-52	0.247916	0.273	0.102	2.59591e-47
SDAD1	7.09497e-52	0.243945	0.348	0.161	2.59683e-47
AP1AR	7.23936e-52	0.192393	0.348	0.159	2.64968e-47
TMEM131	7.37715e-52	0.202985	0.389	0.195	2.70011e-47
PSMB10	7.79429e-52	0.150606	0.5	0.273	2.85279e-47
REST	8.23031e-52	0.222807	0.464	0.254	3.01237e-47
RAP1B	8.39885e-52	-0.0731636	0.573	0.344	3.07406e-47
NFKBIL1	8.4373e-52	0.0881194	0.321	0.139	3.08814e-47
USP36	8.56395e-52	0.177935	0.322	0.138	3.13449e-47
DDX23	8.79571e-52	0.175799	0.387	0.19	3.21932e-47
RNF41	8.89666e-52	0.2144	0.293	0.117	3.25626e-47
PSMD12	9.90009e-52	0.180338	0.451	0.246	3.62353e-47
RDH10	1.00688e-51	0.0946833	0.417	0.212	3.68527e-47
SLC6A6	1.04992e-51	-0.0242788	0.33	0.14	3.84279e-47
ARFGEF3	1.19096e-51	0.281712	0.378	0.181	4.35903e-47
SPARC	1.21529e-51	-1.3664	0.361	0.5	4.44808e-47
CCDC174	1.21723e-51	0.0999767	0.345	0.156	4.45518e-47
SWAP70	1.25862e-51	0.183355	0.352	0.161	4.60667e-47
MKLN1	1.26802e-51	0.141539	0.431	0.229	4.6411e-47
PABPN1	1.27388e-51	0.113719	0.515	0.288	4.66252e-47
RAB14	1.29347e-51	0.0457303	0.558	0.331	4.73422e-47
PRELID3B	1.32987e-51	0.039626	0.5	0.289	4.86747e-47
UGP2	1.33702e-51	0.0226981	0.549	0.317	4.89364e-47
SCARB2	1.34191e-51	0.0143242	0.589	0.341	4.91152e-47
CIR1	1.35018e-51	0.127364	0.483	0.275	4.94178e-47
DNM1L	1.38012e-51	0.153948	0.42	0.22	5.05136e-47
YY1	1.41398e-51	0.271735	0.585	0.347	5.1753e-47
BRAF	1.49456e-51	0.227275	0.369	0.174	5.47023e-47
ZMYM2	1.56466e-51	0.273852	0.484	0.268	5.72682e-47
FAM126A	1.61195e-51	0.151929	0.214	0.061	5.8999e-47
DDHD2	1.66096e-51	0.133996	0.216	0.06	6.07928e-47
VTI1B	1.72783e-51	0.18304	0.498	0.278	6.32404e-47
PREPL	1.77898e-51	0.0845902	0.318	0.133	6.51126e-47
PTK2	1.84408e-51	0.197432	0.479	0.253	6.74951e-47
COPA	1.90514e-51	0.112238	0.581	0.351	6.97299e-47
ATP2C1	1.98904e-51	0.161947	0.479	0.262	7.2801e-47
SYMPK	2.07426e-51	0.168183	0.384	0.186	7.592e-47
GJB1	2.26788e-51	0.244057	0.327	0.143	8.30069e-47
RTF2	2.27612e-51	-0.0161137	0.513	0.304	8.33084e-47
ONECUT1	2.43136e-51	0.231382	0.107	0	8.89903e-47
ALG3	2.52089e-51	0.065183	0.383	0.187	9.2267e-47
LCN2	2.61501e-51	0.835265	0.804	0.553	9.57121e-47
PDPK1	2.73773e-51	0.188376	0.374	0.184	1.00204e-46
NMT1	2.79734e-51	0.0977081	0.52	0.29	1.02386e-46
DHX30	2.84303e-51	0.137714	0.373	0.182	1.04058e-46
MRPL41	3.04429e-51	0.086858	0.549	0.328	1.11424e-46
ERN2	3.2591e-51	0.379414	0.332	0.146	1.19286e-46
EPM2AIP1	3.41344e-51	0.130934	0.295	0.115	1.24935e-46
SFSWAP	3.5308e-51	0.157794	0.4	0.2	1.29231e-46
AP1G2	3.53968e-51	0.327838	0.376	0.185	1.29556e-46
MAPK1IP1L	3.63584e-51	0.0447548	0.486	0.276	1.33075e-46
ATM	3.6847e-51	0.134319	0.359	0.167	1.34864e-46
MAN1A1	3.75473e-51	0.136963	0.312	0.127	1.37427e-46
ITGB4	4.30646e-51	0.154725	0.622	0.365	1.57621e-46
NCOR1	4.49986e-51	0.149181	0.503	0.281	1.647e-46
TWF1	4.58211e-51	0.118927	0.448	0.243	1.6771e-46
XRN2	4.79531e-51	0.181863	0.514	0.293	1.75513e-46
CISD2	5.45284e-51	0.0255205	0.485	0.264	1.99579e-46
MT1E	5.88203e-51	-1.91188	0.233	0.381	2.15288e-46
PRSS2	6.0526e-51	0.674102	0.215	0.055	2.21531e-46
SARNP	6.09782e-51	0.0852162	0.453	0.244	2.23186e-46
PERP	6.53143e-51	0.235134	0.759	0.452	2.39057e-46
CS	6.60412e-51	0.159504	0.361	0.174	2.41717e-46
PKN1	6.6194e-51	0.149729	0.403	0.201	2.42277e-46
C11orf24	6.62658e-51	0.0645682	0.255	0.089	2.4254e-46
DHX16	6.76391e-51	0.212755	0.338	0.152	2.47566e-46
PPP2R2A	6.76499e-51	0.177882	0.429	0.225	2.47605e-46
NUCB2	6.89557e-51	0.132374	0.437	0.222	2.52385e-46
SRSF6	7.16591e-51	0.0536555	0.498	0.28	2.62279e-46
HINT3	7.28703e-51	0.128868	0.315	0.135	2.66713e-46
ALDOA	7.5026e-51	0.088025	0.327	0.146	2.74603e-46
ICA1	7.90481e-51	0.181321	0.453	0.245	2.89324e-46
CSRNP1	8.19994e-51	0.0237465	0.364	0.17	3.00126e-46
NAA15	8.72466e-51	0.194409	0.374	0.18	3.19331e-46
NEK6	9.28764e-51	0.0518629	0.321	0.135	3.39937e-46
STT3A	9.62593e-51	0.0768727	0.374	0.182	3.52319e-46
SELENOW	9.78659e-51	0.108626	0.713	0.453	3.58199e-46
PPP2R5E	9.99903e-51	0.196132	0.457	0.25	3.65975e-46
REXO4	1.00932e-50	0.243404	0.342	0.158	3.69421e-46
COL18A1	1.01639e-50	-0.047995	0.427	0.22	3.72011e-46
CYB561	1.04104e-50	0.264508	0.383	0.193	3.8103e-46
DCTN1	1.04474e-50	0.183734	0.426	0.223	3.82387e-46
AK2	1.05178e-50	0.0868972	0.465	0.253	3.84964e-46
ERICH1	1.07016e-50	0.245135	0.356	0.173	3.9169e-46
LSM1	1.07744e-50	-0.0462357	0.408	0.214	3.94355e-46
SETX	1.10845e-50	0.260458	0.484	0.266	4.05703e-46
H3F3B	1.14353e-50	0.387957	0.879	0.637	4.18544e-46
USP34	1.14845e-50	0.227776	0.496	0.279	4.20343e-46
PCNP	1.23408e-50	0.0620851	0.521	0.315	4.51685e-46
EHF	1.26407e-50	0.257244	0.532	0.29	4.62661e-46
FAM53C	1.2971e-50	0.189437	0.325	0.144	4.74752e-46
FILIP1L	1.34384e-50	0.166843	0.248	0.083	4.9186e-46
SETD7	1.39119e-50	0.0242673	0.329	0.143	5.0919e-46
R3HDM4	1.48617e-50	0.10443	0.462	0.248	5.43952e-46
FARP2	1.50481e-50	0.238789	0.365	0.181	5.50776e-46
RSPH3	1.55792e-50	0.245334	0.259	0.091	5.70214e-46
TXNDC12	1.74798e-50	0.153961	0.439	0.239	6.39778e-46
CTNNBL1	1.78414e-50	0.14864	0.415	0.216	6.53013e-46
RNF149	1.93599e-50	0.0892674	0.504	0.288	7.08591e-46
FMO5	1.94181e-50	0.228357	0.229	0.071	7.10722e-46
SAMD4A	2.05335e-50	0.137332	0.258	0.09	7.51547e-46
TSPYL4	2.08279e-50	0.190612	0.226	0.068	7.62324e-46
ILF3	2.23618e-50	0.123135	0.532	0.293	8.18465e-46
CAV2	2.29144e-50	0.101501	0.49	0.282	8.38689e-46
CEACAM7	2.33183e-50	0.770628	0.275	0.107	8.53472e-46
RPS15A	2.48189e-50	-0.461505	0.884	0.861	9.08395e-46
DYRK2	2.51284e-50	0.120533	0.35	0.163	9.19723e-46
KRAS	2.53294e-50	0.238928	0.505	0.282	9.27082e-46
SMAP1	2.62614e-50	0.170143	0.464	0.256	9.61194e-46
TNFSF10	2.75727e-50	0.197344	0.457	0.253	1.00919e-45
PLEKHA7	3.10064e-50	0.226252	0.384	0.196	1.13487e-45
GSKIP	3.14014e-50	0.218423	0.358	0.17	1.14932e-45
SRP72	3.14649e-50	0.096135	0.509	0.292	1.15165e-45
PLXNB1	3.15264e-50	0.209787	0.351	0.164	1.1539e-45
LINC00963	3.16105e-50	0.217221	0.285	0.114	1.15698e-45
TMEM123	3.21203e-50	0.19618	0.602	0.372	1.17563e-45
TALDO1	3.3419e-50	0.0278521	0.564	0.351	1.22317e-45
IFRD1	3.392e-50	0.184173	0.448	0.24	1.24151e-45
ZFPM1	3.60144e-50	0.242889	0.281	0.11	1.31816e-45
NOSIP	3.641e-50	0.0492944	0.48	0.275	1.33264e-45
SNRPC	3.74687e-50	0.0572165	0.516	0.3	1.37139e-45
SPEN	4.16966e-50	0.276471	0.516	0.285	1.52614e-45
SPTLC2	4.28303e-50	0.131631	0.462	0.258	1.56763e-45
CIAO2B	4.36366e-50	0.058407	0.538	0.336	1.59714e-45
DNAJC7	4.55176e-50	0.0803339	0.505	0.289	1.66599e-45
PSMD6	4.55305e-50	0.0600993	0.377	0.185	1.66646e-45
MRPL18	4.68921e-50	-0.0271745	0.452	0.256	1.7163e-45
LSM12	4.74344e-50	0.0244597	0.445	0.242	1.73615e-45
SAMD12	4.87355e-50	0.290831	0.433	0.236	1.78377e-45
C19orf25	5.4637e-50	0.202062	0.345	0.158	1.99977e-45
WASHC4	5.73173e-50	0.105986	0.352	0.163	2.09787e-45
GATD1	6.31154e-50	0.216747	0.24	0.08	2.31009e-45
ZDHHC9	6.59437e-50	0.0223762	0.363	0.174	2.4136e-45
PCDH1	7.25677e-50	0.134058	0.517	0.292	2.65605e-45
AP1G1	7.4747e-50	0.0967697	0.421	0.221	2.73581e-45
GIPC2	7.80608e-50	0.134197	0.252	0.087	2.8571e-45
NRIP1	7.84442e-50	0.207079	0.442	0.234	2.87113e-45
NEDD4L	8.17115e-50	0.276254	0.352	0.166	2.99072e-45
GGCX	8.21616e-50	0.0530779	0.308	0.129	3.00719e-45
SHOC2	8.9557e-50	0.230084	0.455	0.252	3.27787e-45
RPL27A	8.97433e-50	0.350231	0.932	0.793	3.28469e-45
TUT7	9.63455e-50	0.245502	0.43	0.23	3.52634e-45
PDE4C	9.64019e-50	0.230441	0.134	0.015	3.52841e-45
DHX15	9.97372e-50	0.0853633	0.51	0.282	3.65048e-45
GBP3	1.04095e-49	0.169536	0.387	0.181	3.81e-45
FCGRT	1.10163e-49	-0.20931	0.541	0.31	4.03208e-45
MRPS10	1.1248e-49	0.160173	0.428	0.228	4.11688e-45
DGAT1	1.15049e-49	0.115063	0.425	0.23	4.21092e-45
POLR2A	1.15613e-49	0.0440042	0.424	0.219	4.23157e-45
SRSF7	1.17241e-49	-0.0918932	0.645	0.389	4.29112e-45
FAM192A	1.27198e-49	0.188104	0.395	0.197	4.65556e-45
SPCS2	1.2909e-49	0.10459	0.615	0.373	4.72482e-45
MBTPS1	1.30845e-49	0.152087	0.476	0.265	4.78906e-45
ECHDC2	1.3104e-49	0.185035	0.359	0.172	4.7962e-45
PSME4	1.39684e-49	0.244815	0.377	0.187	5.11256e-45
THOC7	1.40107e-49	0.0128276	0.448	0.257	5.12805e-45
LPCAT3	1.4402e-49	0.130793	0.323	0.146	5.27128e-45
PRSS3	1.47883e-49	0.222933	0.39	0.199	5.41266e-45
AC020656.1	1.55349e-49	0.144611	0.194	0.045	5.68594e-45
AKAP1	1.57237e-49	0.168516	0.462	0.252	5.75503e-45
MRPL21	1.64355e-49	-0.0352616	0.458	0.259	6.01557e-45
F5	1.70241e-49	0.286231	0.214	0.061	6.23101e-45
TWISTNB	1.72229e-49	0.167839	0.355	0.17	6.30375e-45
RPL11	1.77156e-49	-0.480915	0.925	0.883	6.48409e-45
FBXL20	1.83743e-49	0.184942	0.288	0.116	6.72519e-45
SPCS3	1.8947e-49	0.0222927	0.573	0.334	6.9348e-45
ZNF830	1.95585e-49	0.175919	0.31	0.13	7.15861e-45
CTDSP2	2.13867e-49	0.0489575	0.446	0.245	7.82773e-45
SOD1	2.25275e-49	0.15443	0.725	0.485	8.24528e-45
CHD4	2.30382e-49	0.156172	0.58	0.327	8.43221e-45
ANP32A	2.32313e-49	0.148651	0.544	0.311	8.50288e-45
SURF4	2.35607e-49	-0.0152763	0.52	0.307	8.62346e-45
INSR	2.58799e-49	0.150765	0.491	0.271	9.47232e-45
CSPP1	2.68892e-49	0.349457	0.322	0.144	9.8417e-45
GATM	2.93969e-49	0.378113	0.273	0.11	1.07595e-44
PNMA1	2.95356e-49	0.121032	0.264	0.096	1.08103e-44
MICOS13	3.19589e-49	0.076027	0.574	0.339	1.16973e-44
TTTY14	3.21083e-49	0.0937308	0.108	0.002	1.1752e-44
PYGB	3.26229e-49	0.1449	0.406	0.209	1.19403e-44
KHSRP	3.43136e-49	0.163441	0.452	0.242	1.25591e-44
MICALL2	3.44531e-49	0.301363	0.373	0.185	1.26102e-44
DNAJC13	3.44942e-49	0.199127	0.388	0.193	1.26252e-44
MANEA	3.5199e-49	0.0989812	0.231	0.073	1.28832e-44
ACADVL	3.54594e-49	-0.130026	0.524	0.307	1.29785e-44
USP3	3.88276e-49	0.187651	0.389	0.198	1.42113e-44
UBQLN1	3.9665e-49	-0.0271408	0.482	0.272	1.45178e-44
GTF2H5	4.0023e-49	0.0258322	0.444	0.246	1.46488e-44
FAAP20	4.09338e-49	0.118843	0.445	0.238	1.49822e-44
BTBD2	4.30758e-49	0.0463826	0.298	0.123	1.57662e-44
PCSK7	4.3381e-49	0.116681	0.433	0.232	1.58779e-44
PTBP1	4.36513e-49	0.0605895	0.558	0.327	1.59768e-44
TMEM50B	4.52648e-49	0.0432886	0.405	0.208	1.65674e-44
KLK1	5.12939e-49	0.0173258	0.238	0.081	1.87741e-44
PRKAA1	6.15563e-49	0.190756	0.454	0.251	2.25302e-44
MESD	6.19161e-49	0.13193	0.516	0.295	2.26619e-44
MDK	6.59572e-49	0.102371	0.716	0.438	2.4141e-44
CRYL1	6.98267e-49	0.159024	0.303	0.129	2.55573e-44
MAEA	7.0507e-49	0.150819	0.364	0.173	2.58063e-44
ADAM17	7.40666e-49	-0.0151302	0.417	0.212	2.71091e-44
ACTR10	8.37363e-49	0.0405603	0.457	0.251	3.06483e-44
UTY	8.51567e-49	0.0595941	0.113	0.005	3.11682e-44
TMEM176A	1.00478e-48	0.209796	0.518	0.306	3.67758e-44
KLHDC2	1.04339e-48	0.0403691	0.385	0.192	3.81891e-44
NR0B2	1.04566e-48	0.153502	0.103	0.001	3.82721e-44
NDUFV1	1.07516e-48	0.0372437	0.434	0.231	3.93518e-44
PCM1	1.15957e-48	0.242425	0.467	0.261	4.24413e-44
MMUT	1.19244e-48	0.122623	0.308	0.131	4.36443e-44
TMEM263	1.19606e-48	0.058493	0.344	0.161	4.37771e-44
ATP6V1C1	1.20475e-48	0.18235	0.382	0.189	4.4095e-44
GOT2	1.23386e-48	0.186635	0.34	0.161	4.51604e-44
GNB2	1.25171e-48	0.0300379	0.614	0.389	4.58139e-44
RBM27	1.37183e-48	0.267626	0.466	0.267	5.02102e-44
TMA16	1.38484e-48	0.192956	0.362	0.174	5.06865e-44
JKAMP	1.44941e-48	0.153074	0.393	0.2	5.30497e-44
MARS	1.45382e-48	0.0993035	0.312	0.136	5.32112e-44
TRIP6	1.56485e-48	0.117846	0.48	0.279	5.72751e-44
BAIAP2L2	1.67055e-48	0.18532	0.318	0.141	6.1144e-44
DNAJC12	1.72946e-48	0.260339	0.134	0.016	6.33e-44
LGMN	1.77831e-48	0.0805734	0.456	0.247	6.50879e-44
VCAN	1.88511e-48	-0.0733504	0.393	0.172	6.89968e-44
TAB2	1.93983e-48	0.128321	0.371	0.181	7.09998e-44
ATXN2	2.00662e-48	0.235078	0.411	0.215	7.34444e-44
PABPC1	2.17031e-48	0.324579	0.887	0.633	7.94354e-44
ELOVL6	2.33097e-48	0.0762774	0.224	0.07	8.53158e-44
COMMD2	2.51199e-48	0.178176	0.395	0.201	9.19413e-44
SGPP1	2.55492e-48	0.100843	0.193	0.05	9.35127e-44
VPS53	2.57624e-48	0.129481	0.257	0.095	9.42929e-44
SCAF1	2.61981e-48	0.148192	0.386	0.193	9.58878e-44
CCT8	2.64041e-48	-0.0769467	0.548	0.324	9.66416e-44
CPEB4	2.67845e-48	0.324954	0.374	0.187	9.8034e-44
PRKY	2.68514e-48	0.0658318	0.11	0.004	9.82789e-44
ARFGEF2	2.97893e-48	0.209567	0.398	0.205	1.09032e-43
ACAP2	3.09926e-48	0.178589	0.464	0.256	1.13436e-43
RETREG3	3.47666e-48	0.0492627	0.392	0.201	1.27249e-43
HSPA4L	3.48768e-48	0.107547	0.122	0.01	1.27653e-43
SPIRE2	3.56198e-48	0.180639	0.28	0.112	1.30372e-43
STX3	3.73478e-48	0.127155	0.374	0.185	1.36697e-43
FTX	3.82724e-48	0.32048	0.452	0.245	1.40081e-43
YWHAB	4.01587e-48	0.177195	0.801	0.505	1.46985e-43
PUF60	4.05292e-48	0.0344726	0.526	0.302	1.48341e-43
TRMT10C	4.08729e-48	0.124321	0.402	0.204	1.49599e-43
SLC30A7	4.09406e-48	0.16523	0.367	0.181	1.49847e-43
SLC16A4	4.09673e-48	0.226257	0.276	0.11	1.49944e-43
LINC02432	4.11173e-48	0.301708	0.206	0.062	1.50493e-43
DBNL	4.18516e-48	0.0913035	0.459	0.254	1.53181e-43
SERINC2	4.2242e-48	0.175607	0.62	0.377	1.5461e-43
INSIG2	4.32699e-48	0.153408	0.392	0.203	1.58372e-43
ILRUN	4.37995e-48	0.130876	0.439	0.234	1.60311e-43
PIAS1	4.46851e-48	0.216828	0.394	0.204	1.63552e-43
KITLG	5.20742e-48	0.0863817	0.258	0.098	1.90597e-43
MPHOSPH10	5.3906e-48	0.155123	0.439	0.242	1.97302e-43
MDM4	5.93366e-48	0.166162	0.475	0.262	2.17178e-43
RAB11B	6.00221e-48	0.124026	0.5	0.277	2.19687e-43
ANXA7	6.12649e-48	-0.0132605	0.525	0.313	2.24236e-43
OXR1	6.27769e-48	0.333119	0.491	0.283	2.2977e-43
FNIP1	6.29356e-48	0.252007	0.39	0.203	2.30351e-43
SLC11A2	6.4336e-48	0.159826	0.294	0.125	2.35476e-43
UFL1	6.46654e-48	0.181939	0.413	0.221	2.36682e-43
SART1	6.73074e-48	0.123141	0.331	0.154	2.46352e-43
VSIG1	6.84123e-48	0.245876	0.135	0.017	2.50396e-43
FBXO7	6.93749e-48	0.0638203	0.401	0.207	2.53919e-43
CSNK1G2	7.00282e-48	0.211815	0.422	0.221	2.5631e-43
KLF4	7.08564e-48	0.20594	0.557	0.337	2.59341e-43
LAMTOR3	7.13102e-48	0.102726	0.37	0.184	2.61003e-43
SCAF8	7.22678e-48	0.203814	0.299	0.127	2.64507e-43
NFATC2IP	7.2677e-48	0.16686	0.415	0.217	2.66005e-43
IARS	7.78346e-48	0.191336	0.383	0.197	2.84883e-43
MBD4	7.83179e-48	0.167859	0.414	0.219	2.86651e-43
KHNYN	8.52497e-48	0.145464	0.309	0.135	3.12023e-43
DANCR	8.77137e-48	0.124021	0.4	0.208	3.21041e-43
ZG16B	8.95843e-48	0.394626	0.488	0.281	3.27888e-43
RALGAPA1	9.27955e-48	0.231646	0.396	0.201	3.39641e-43
SUPT6H	9.31908e-48	0.194493	0.453	0.248	3.41088e-43
ZNRD2	9.94309e-48	0.122895	0.419	0.214	3.63927e-43
LATS1	1.04658e-47	0.143542	0.307	0.132	3.83057e-43
VPS13C	1.04729e-47	0.277546	0.512	0.295	3.83319e-43
SEPTIN7	1.06328e-47	0.0931098	0.642	0.393	3.89172e-43
PROS1	1.14735e-47	0.0486633	0.27	0.102	4.19943e-43
TRPC4AP	1.18733e-47	0.0430904	0.393	0.2	4.34575e-43
LUM	1.20721e-47	-1.45389	0.313	0.458	4.41852e-43
DOP1A	1.21456e-47	0.224198	0.201	0.057	4.4454e-43
SLC5A3	1.3039e-47	0.195779	0.379	0.193	4.77241e-43
C6orf47	1.32166e-47	0.228145	0.285	0.117	4.8374e-43
TPK1	1.3527e-47	0.155824	0.185	0.047	4.95103e-43
IFI35	1.35427e-47	0.0913834	0.392	0.199	4.95678e-43
AIG1	1.41685e-47	0.134564	0.421	0.225	5.1858e-43
DDX17	1.45064e-47	0.116297	0.679	0.399	5.3095e-43
CYP4V2	1.47523e-47	0.0480214	0.259	0.096	5.39948e-43
RPL39	1.57025e-47	-0.490075	0.893	0.877	5.74727e-43
SELENOF	1.66057e-47	-0.0347136	0.62	0.377	6.07784e-43
PRKD2	1.69811e-47	0.104454	0.339	0.157	6.21525e-43
TAF3	1.73637e-47	0.284364	0.307	0.135	6.35531e-43
SPRR3	1.82676e-47	-2.61631	0.02	0.112	6.68612e-43
NCOA3	1.86706e-47	0.132045	0.441	0.24	6.83363e-43
SREK1	1.89924e-47	0.250731	0.506	0.285	6.9514e-43
AZI2	1.95767e-47	0.0501659	0.335	0.151	7.16526e-43
ATG13	2.01564e-47	0.0499116	0.341	0.161	7.37744e-43
KCNK6	2.03291e-47	0.270732	0.398	0.208	7.44066e-43
AREG	2.21765e-47	0.257636	0.471	0.256	8.11682e-43
CCAR1	2.35175e-47	0.302648	0.494	0.276	8.60764e-43
RUFY2	2.40483e-47	0.216471	0.287	0.121	8.80191e-43
USP16	2.42047e-47	0.233372	0.466	0.258	8.85917e-43
NDUFA10	2.44889e-47	-0.0576587	0.499	0.289	8.96318e-43
SLC1A5	2.57711e-47	-0.0427788	0.443	0.244	9.43246e-43
HNRNPD	2.57812e-47	0.0949688	0.607	0.344	9.43617e-43
BIRC2	2.95141e-47	0.0743614	0.445	0.248	1.08025e-42
NKIRAS2	3.01822e-47	0.179534	0.311	0.138	1.1047e-42
RANBP2	3.05485e-47	0.0734266	0.523	0.302	1.1181e-42
MAP3K13	3.06262e-47	0.125302	0.502	0.288	1.12095e-42
HNRNPA1	3.08067e-47	0.176636	0.808	0.533	1.12756e-42
METTL27	3.22058e-47	0.0929598	0.2	0.056	1.17877e-42
PITPNM1	3.252e-47	0.221912	0.291	0.122	1.19026e-42
NDUFB5	3.58515e-47	-0.0165012	0.499	0.297	1.3122e-42
TPR	3.68096e-47	0.185202	0.634	0.353	1.34727e-42
TLK1	4.13051e-47	0.140185	0.469	0.263	1.51181e-42
PUM2	4.15688e-47	0.141691	0.445	0.244	1.52146e-42
SNX14	4.20207e-47	0.129908	0.362	0.173	1.538e-42
CNOT4	4.25382e-47	0.141089	0.376	0.191	1.55694e-42
RPL7A	4.83216e-47	-0.500749	0.897	0.857	1.76862e-42
CAV1	5.11057e-47	0.08176	0.303	0.129	1.87052e-42
DHX38	5.25489e-47	0.197573	0.351	0.168	1.92334e-42
ANAPC11	5.42709e-47	0.117445	0.546	0.333	1.98637e-42
ZFP91	5.70632e-47	0.142408	0.505	0.281	2.08857e-42
NRBF2	5.79872e-47	0.171741	0.363	0.184	2.12239e-42
COQ10B	5.87792e-47	0.044677	0.4	0.209	2.15138e-42
HINT2	6.03232e-47	0.450155	0.431	0.238	2.20789e-42
UBAP2	6.05922e-47	0.192619	0.39	0.203	2.21774e-42
HIST1H2AC	6.06991e-47	0.38489	0.481	0.281	2.22165e-42
TNFRSF1A	6.41441e-47	0.0641691	0.52	0.299	2.34774e-42
WWC2	6.77544e-47	0.181297	0.297	0.128	2.47988e-42
PPP6R1	6.79402e-47	0.125964	0.446	0.249	2.48668e-42
CKMT1A	6.80437e-47	0.0739483	0.16	0.031	2.49047e-42
LYRM2	7.77194e-47	0.130883	0.355	0.177	2.84461e-42
ELOVL1	7.80679e-47	0.0341637	0.428	0.236	2.85736e-42
TOR1AIP2	7.96064e-47	0.126484	0.552	0.319	2.91368e-42
GINM1	8.0802e-47	0.0484795	0.391	0.201	2.95743e-42
PCNX2	9.0322e-47	0.252748	0.275	0.111	3.30587e-42
NADSYN1	9.22616e-47	0.199603	0.268	0.106	3.37687e-42
OTUD6B-AS1	9.5665e-47	0.140476	0.441	0.244	3.50144e-42
KPNA6	1.01211e-46	0.116303	0.421	0.223	3.70443e-42
ANKLE2	1.01256e-46	0.305994	0.513	0.295	3.70606e-42
MRPL1	1.04943e-46	0.093816	0.376	0.19	3.84104e-42
FAM8A1	1.13524e-46	0.0832798	0.233	0.08	4.1551e-42
F2RL1	1.16017e-46	0.177693	0.344	0.164	4.24635e-42
SSR3	1.16515e-46	-0.0542225	0.621	0.389	4.26456e-42
TMEM230	1.23274e-46	-0.0863429	0.466	0.265	4.51195e-42
PPFIA1	1.24979e-46	0.149698	0.425	0.226	4.57436e-42
SLC25A39	1.26367e-46	0.0855482	0.458	0.258	4.62515e-42
SLC44A1	1.27775e-46	0.111959	0.525	0.31	4.67671e-42
SCAMP2	1.34626e-46	0.0654753	0.462	0.256	4.92745e-42
SRSF5	1.37342e-46	0.0852862	0.676	0.411	5.02686e-42
FUBP1	1.41634e-46	0.0977793	0.43	0.232	5.18395e-42
LRCH3	1.44097e-46	0.186028	0.268	0.104	5.27409e-42
EHD1	1.44894e-46	0.135435	0.395	0.21	5.30326e-42
CRBN	1.70648e-46	0.0802251	0.357	0.173	6.24591e-42
STK3	1.72634e-46	0.133923	0.382	0.19	6.31859e-42
CDK13	1.74363e-46	0.17917	0.45	0.248	6.38186e-42
SPATS2	1.7494e-46	0.207857	0.287	0.121	6.40297e-42
SLC25A16	1.75374e-46	0.215492	0.25	0.092	6.41888e-42
KRIT1	1.75628e-46	0.188866	0.355	0.174	6.42817e-42
YARS	1.78071e-46	0.174103	0.341	0.162	6.51757e-42
TP53INP1	1.81073e-46	0.251998	0.201	0.058	6.62747e-42
HMGCS1	1.83916e-46	0.236172	0.436	0.242	6.73151e-42
CD44	1.90164e-46	0.149636	0.742	0.451	6.9602e-42
DCDC2	2.02683e-46	0.159828	0.191	0.05	7.4184e-42
NOB1	2.05676e-46	0.091681	0.357	0.178	7.52796e-42
CARM1	2.07827e-46	0.173706	0.319	0.147	7.60668e-42
CDK11B	2.08613e-46	0.280236	0.36	0.179	7.63544e-42
HM13	2.16995e-46	-0.062033	0.567	0.333	7.94224e-42
SRPRA	2.19125e-46	0.0741637	0.431	0.238	8.02018e-42
UBE2B	2.21427e-46	0.0374984	0.606	0.381	8.10447e-42
CPQ	2.23101e-46	0.200383	0.332	0.156	8.1657e-42
CCNT2	2.24536e-46	0.150587	0.379	0.192	8.21826e-42
SUMF2	2.25268e-46	0.0113969	0.489	0.28	8.24502e-42
BRWD1	2.27784e-46	0.24263	0.437	0.237	8.33714e-42
C6orf62	2.28309e-46	0.0932281	0.505	0.293	8.35632e-42
BZW2	2.31578e-46	0.166375	0.416	0.232	8.47599e-42
POLR1C	2.32393e-46	0.210393	0.273	0.111	8.50583e-42
TEAD1	2.5176e-46	0.119072	0.389	0.202	9.21467e-42
RPS21	2.52632e-46	-0.484483	0.901	0.895	9.24658e-42
PTGER4	2.52827e-46	0.122991	0.197	0.053	9.25371e-42
KLF3	2.56743e-46	0.197994	0.511	0.292	9.39703e-42
VPS51	2.57652e-46	0.0844247	0.394	0.203	9.43033e-42
EPN2	2.65117e-46	0.175419	0.355	0.173	9.70353e-42
DNAJB12	2.66306e-46	0.113874	0.383	0.201	9.74705e-42
SCIN	2.6766e-46	0.232348	0.197	0.057	9.79662e-42
SLC25A13	2.75859e-46	0.14975	0.356	0.179	1.00967e-41
DNAJC2	2.9977e-46	0.161255	0.415	0.227	1.09719e-41
TTC14	3.25015e-46	0.176027	0.385	0.197	1.18959e-41
PAK2	3.26513e-46	0.111922	0.575	0.346	1.19507e-41
FAM107B	3.29578e-46	0.0314973	0.466	0.257	1.20629e-41
CHMP3	3.45892e-46	0.0843273	0.622	0.357	1.266e-41
TMEM245	3.5967e-46	0.241119	0.446	0.258	1.31643e-41
DNAJB2	3.77063e-46	0.136152	0.394	0.209	1.38009e-41
WDR13	3.84488e-46	-0.0263256	0.426	0.234	1.40727e-41
TMEM54	3.92687e-46	0.22714	0.526	0.307	1.43727e-41
NOL11	4.0743e-46	0.129042	0.303	0.134	1.49123e-41
UIMC1	4.09205e-46	0.12522	0.291	0.124	1.49773e-41
CAPZA2	4.36557e-46	-0.0684997	0.566	0.35	1.59784e-41
MRPL14	4.46049e-46	0.0928475	0.527	0.306	1.63258e-41
BICDL2	4.53546e-46	0.293377	0.42	0.224	1.66002e-41
BCAR1	4.55085e-46	0.0986468	0.427	0.233	1.66566e-41
ARFIP1	4.77289e-46	0.159817	0.408	0.218	1.74693e-41
DSP	5.28121e-46	0.0297944	0.7	0.379	1.93298e-41
CALR	5.38352e-46	0.180947	0.799	0.518	1.97042e-41
ARFGAP2	5.67379e-46	0.104168	0.392	0.204	2.07666e-41
RSPRY1	5.72541e-46	0.0473292	0.345	0.163	2.09556e-41
ZBTB11	5.99266e-46	0.188622	0.325	0.15	2.19337e-41
RSL1D1	6.7868e-46	0.0707624	0.576	0.34	2.48403e-41
MPST	7.43756e-46	0.0220538	0.428	0.229	2.72222e-41
VAT1	7.47517e-46	0.0827436	0.375	0.195	2.73599e-41
UTP3	7.84233e-46	0.165032	0.316	0.142	2.87037e-41
C16orf58	8.14075e-46	0.0651031	0.303	0.132	2.9796e-41
PIGF	8.61673e-46	0.0395159	0.259	0.098	3.15381e-41
SERPING1	9.02782e-46	-0.198902	0.465	0.244	3.30427e-41
ZNF322	9.15233e-46	0.160484	0.297	0.129	3.34985e-41
IFRD2	9.24935e-46	0.0184364	0.351	0.175	3.38535e-41
DDI2	9.33987e-46	0.149603	0.318	0.146	3.41848e-41
DDAH2	9.45543e-46	0.0366602	0.548	0.331	3.46078e-41
ATR	9.46938e-46	0.249552	0.369	0.188	3.46589e-41
IL15RA	9.47632e-46	0.140128	0.261	0.1	3.46843e-41
FHDC1	9.52399e-46	0.201594	0.214	0.069	3.48587e-41
TNNC1	9.63049e-46	0.173968	0.157	0.032	3.52486e-41
CTSD	1.04724e-45	0.282965	0.824	0.548	3.833e-41
CKAP5	1.10761e-45	0.196649	0.345	0.167	4.05398e-41
TUFM	1.12799e-45	-0.0515962	0.542	0.326	4.12855e-41
DNAJB11	1.15587e-45	0.0231629	0.484	0.273	4.2306e-41
LRP5	1.19447e-45	0.0259038	0.413	0.225	4.37189e-41
ARHGAP32	1.20561e-45	0.22974	0.449	0.252	4.41265e-41
LUC7L	1.21065e-45	0.0916734	0.365	0.18	4.43112e-41
SLC30A9	1.2399e-45	0.141476	0.37	0.192	4.53816e-41
F12	1.24002e-45	0.0610792	0.262	0.102	4.53859e-41
IMP4	1.24134e-45	-0.0229042	0.406	0.22	4.54343e-41
CRCP	1.25201e-45	0.1484	0.361	0.182	4.58248e-41
ERAP1	1.36226e-45	0.0999025	0.251	0.093	4.986e-41
P4HTM	1.37302e-45	0.0396321	0.35	0.169	5.02537e-41
PSMA3	1.42892e-45	0.0182513	0.556	0.327	5.22999e-41
TMED5	1.43425e-45	0.0945275	0.394	0.205	5.24951e-41
TAP2	1.46455e-45	0.261637	0.403	0.217	5.36038e-41
GADD45GIP1	1.46846e-45	0.142544	0.609	0.355	5.37473e-41
DDX19B	1.56798e-45	0.0578036	0.304	0.135	5.73897e-41
ASPSCR1	1.67982e-45	0.109096	0.283	0.119	6.1483e-41
ARL6IP5	1.79505e-45	0.0621195	0.573	0.37	6.57005e-41
CANT1	1.80588e-45	0.166774	0.413	0.219	6.60971e-41
KLC1	1.81367e-45	0.110012	0.437	0.243	6.63823e-41
TMEM163	1.83384e-45	0.0351829	0.165	0.035	6.71205e-41
SGTA	1.88844e-45	0.207376	0.335	0.159	6.91189e-41
TEN1	1.89227e-45	0.156467	0.318	0.145	6.9259e-41
ARL2	1.92142e-45	-0.0688156	0.455	0.254	7.03257e-41
FBXL4	1.94811e-45	0.129621	0.256	0.098	7.13027e-41
STX18	1.99787e-45	0.117843	0.331	0.157	7.3124e-41
ACSS2	2.04447e-45	0.0945928	0.265	0.103	7.48296e-41
MRFAP1	2.14709e-45	-0.126033	0.564	0.346	7.85856e-41
COX7A2L	2.29026e-45	0.0531161	0.53	0.324	8.3826e-41
GRB7	2.31042e-45	0.202895	0.339	0.167	8.45636e-41
DPF2	2.33174e-45	0.125675	0.314	0.142	8.53441e-41
EPB41	2.39081e-45	0.219982	0.348	0.169	8.75059e-41
TWF2	2.48435e-45	0.0108169	0.395	0.212	9.09298e-41
BEX2	2.54586e-45	0.0784082	0.207	0.063	9.31811e-41
WWTR1	2.58265e-45	0.0561141	0.471	0.269	9.45277e-41
RCN1	2.89663e-45	0.115851	0.432	0.23	1.0602e-40
COPE	2.93515e-45	0.0752152	0.61	0.368	1.0743e-40
CAPN1	3.09332e-45	-0.0241437	0.545	0.323	1.13218e-40
RSRP1	3.27999e-45	0.145963	0.507	0.292	1.20051e-40
SSRP1	3.32338e-45	0.0479077	0.457	0.257	1.21639e-40
FKBP2	3.35738e-45	0.0502351	0.28	0.116	1.22884e-40
ERGIC3	3.39995e-45	-0.0146745	0.581	0.352	1.24442e-40
[truncated: 7,725 more rows]

## Sheet: GO
ID	Description	setSize	enrichmentScore	NES	pvalue	p.adjust	qvalues	rank	leading_edge	core_enrichment
GOMF_EXTRACELLULAR_MATRIX_STRUCTURAL_CONSTITUENT	GOMF_EXTRACELLULAR_MATRIX_STRUCTURAL_CONSTITUENT	62	-0.782167	-2.69851	1e-10	2.4215e-07	2.20947e-07	547	tags=50%, list=6%, signal=47%	MXRA5/LAMC1/CILP/LAMA5/COL14A1/COL6A1/ELN/LTBP2/SPON1/MUC4/TGFBI/EFEMP1/COL4A2/MUC5AC/FN1/COL17A1/COL4A1/PRG4/CTHRC1/THBS1/COL1A1/AEBP1/COL1A2/FBLN1/BGN/SPARC/COL3A1/LUM/DCN/IGFBP7/MGP
GOMF_STRUCTURAL_MOLECULE_ACTIVITY	GOMF_STRUCTURAL_MOLECULE_ACTIVITY	343	-0.53461	-2.26429	1e-10	2.4215e-07	2.20947e-07	448	tags=28%, list=5%, signal=28%	CILP/RPS24/MARVELD1/MRPL27/LAMA5/RPS23/RPL8/RSL24D1/MRPL33/TUBB/MRPL55/MRPL24/RPL35A/RPL15/MRPS12/COL14A1/RPL22L1/ACTB/RPL23A/KRT15/MRPL43/RPS7/COL6A1/TUBA1C/RPS14/MRPL36/TUBB4B/RPL18/MRPL20/RPS3/ELN/RPS4Y1/MALL/RPS27A/RPS18/RPS16/MRPS24/RPL36A/RPL5/TUBA1A/RPL10A/RPS27/RPL26/RPS28/RPL37A/RPL10/RPS15A/RPL17/PKP1/RPLP0/RPL11/RPS21/RPL21/RPL39/RPS3A/LTBP2/RPL7A/SPON1/MRPL51/RPL3/MUC4/RPS6/RPL37/TGFB…
GOMF_STRUCTURAL_CONSTITUENT_OF_RIBOSOME	GOMF_STRUCTURAL_CONSTITUENT_OF_RIBOSOME	123	-0.625344	-2.33166	3.68915e-09	4.96467e-06	4.52996e-06	433	tags=40%, list=4%, signal=39%	RPS24/MRPL27/RPS23/RPL8/RSL24D1/MRPL33/MRPL55/MRPL24/RPL35A/RPL15/MRPS12/RPL22L1/RPL23A/MRPL43/RPS7/RPS14/MRPL36/RPL18/MRPL20/RPS3/RPS4Y1/RPS27A/RPS18/RPS16/MRPS24/RPL36A/RPL5/RPL10A/RPS27/RPL26/RPS28/RPL37A/RPL10/RPS15A/RPL17/RPLP0/RPL11/RPS21/RPL21/RPL39/RPS3A/RPL7A/MRPL51/RPL3/RPS6/RPL37/RPS19/RPLP1/RPS4X
GOCC_COLLAGEN_CONTAINING_EXTRACELLULAR_MATRIX	GOCC_COLLAGEN_CONTAINING_EXTRACELLULAR_MATRIX	150	-0.590914	-2.3057	4.10049e-09	4.96467e-06	4.52996e-06	547	tags=35%, list=6%, signal=34%	MXRA5/LAMC1/TGFB1I1/CTSH/CTSF/BMP7/CILP/LAMA5/COL14A1/EGFL7/COL6A1/ELN/ADAMTS1/CTSL/TIMP2/CTSB/SERPINH1/LTBP2/SPON1/S100A4/CXCL12/TGFBI/EFEMP1/COL4A2/FN1/COL17A1/S100A10/TIMP1/A2M/TIMP3/COL4A1/MMP2/PRG4/SERPINF1/ANXA1/CTHRC1/THBS1/COL1A1/CCDC80/AEBP1/SERPINE1/SPARCL1/COL1A2/FBLN1/RARRES2/BGN/SFRP2/SPARC/COL3A1/LUM/DCN/IGFBP7/MGP
GOCC_RIBOSOMAL_SUBUNIT	GOCC_RIBOSOMAL_SUBUNIT	140	-0.597187	-2.29137	8.95119e-09	8.67012e-06	7.91097e-06	801	tags=40%, list=8%, signal=37%	RPL35/MRPL9/MRPS14/RPL39L/RPL32/MRPS26/MRPL57/RPS24/MRPL27/RPS23/RPL8/RSL24D1/MRPL33/MRPL55/MRPL24/RPL35A/RPL15/MRPS12/RPL23A/MRPL43/RPS7/NDUFAB1/RPS14/MRPL36/RPL18/MRPL20/RPS3/RPS4Y1/RPS27A/RPS18/RPS16/MRPS24/RPL36A/RPL5/RPL10A/RPS27/RPL26/RPS28/RPL37A/RPL10/RPS15A/RPL17/RPLP0/RPL11/RPS21/RPL21/RPL39/RPS3A/RPL7A/MRPL51/RPL3/RPS6/RPL37/RPS19/RPLP1/RPS4X
GOCC_EXTERNAL_ENCAPSULATING_STRUCTURE	GOCC_EXTERNAL_ENCAPSULATING_STRUCTURE	184	-0.547419	-2.17625	1.13653e-08	9.17367e-06	8.37042e-06	547	tags=32%, list=6%, signal=31%	MXRA5/LAMC1/TGFB1I1/CTSH/FGF1/CTSF/BMP7/CILP/LAMA5/COL14A1/EGFL7/COL6A1/MMP7/ELN/ADAMTS1/CTSL/TIMP2/CTSB/SERPINH1/LTBP2/SPON1/S100A4/CXCL12/MUC4/SPON2/TGFBI/EPYC/EFEMP1/COL4A2/MUC5AC/FN1/COL17A1/S100A10/TIMP1/A2M/TIMP3/COL4A1/MMP2/PRG4/SERPINF1/ANXA1/CTHRC1/THBS1/COL1A1/CCDC80/AEBP1/SERPINE1/SPARCL1/COL1A2/FBLN1/RARRES2/BGN/SFRP2/SPARC/COL3A1/LUM/DCN/IGFBP7/MGP
GOCC_RIBOSOME	GOCC_RIBOSOME	171	-0.543529	-2.15407	5.32117e-08	3.68149e-05	3.35914e-05	801	tags=36%, list=8%, signal=33%	RPL35/MRPL9/MRPS14/RPL39L/DHX9/RPL32/MRPS26/MRPL57/SERP1/RPS24/MRPL27/RPS23/RPL8/RSL24D1/MRPL33/MRPL55/CHCHD1/MRPL24/RPL35A/RPL15/MRPS12/RPL22L1/RPL23A/MRPL43/RPS7/NDUFAB1/RPS14/MRPL36/RPL18/MRPL20/RPS3/RPS4Y1/RPS27A/RPS18/RPS16/MRPS24/RPL36A/RPL5/RPL10A/RPS27/RPL26/RPS28/RPL37A/RPL10/RPS15A/RPL17/RPLP0/RPL11/RPS21/RPL21/RPL39/RPS3A/RPL7A/MRPL51/RPL3/RPS6/RPL37/RPS19/APOD/RPLP1/RPS4X
GOBP_B_CELL_RECEPTOR_SIGNALING_PATHWAY	GOBP_B_CELL_RECEPTOR_SIGNALING_PATHWAY	31	-0.811215	-2.39135	1.25151e-07	7.52905e-05	6.86981e-05	362	tags=32%, list=4%, signal=31%	BAX/LIME1/CD81/IGLC2/IGHA1/IGHG2/IGHG1/IGHG4/IGLC1/IGKC
GOBP_DIGESTION	GOBP_DIGESTION	44	0.764707	2.12417	1.39916e-07	7.52905e-05	6.86981e-05	374	tags=41%, list=4%, signal=40%	SERPINA3/TFF2/TFF3/TFF1/PGC/LIMA1/GCNT3/PRSS1/PRSS2/SOX9/TJP2/LDLR/PLS1/HIP1R/EZR/STK39/CAPN8/UGCG
GOCC_COLLAGEN_TRIMER	GOCC_COLLAGEN_TRIMER	21	-0.892168	-2.3948	1.7618e-07	8.23897e-05	7.51757e-05	321	tags=52%, list=3%, signal=51%	COL14A1/COL6A1/COL4A2/COL17A1/COL4A1/CTHRC1/COL1A1/COL1A2/COL3A1/LUM/DCN
GOBP_POSITIVE_REGULATION_OF_B_CELL_ACTIVATION	GOBP_POSITIVE_REGULATION_OF_B_CELL_ACTIVATION	45	-0.771534	-2.47926	1.87133e-07	8.23897e-05	7.51757e-05	170	tags=18%, list=2%, signal=18%	CD81/IGLC2/IGHA1/IGHG2/IGHG1/IGHG4/IGLC1/IGKC
GOBP_EXTERNAL_ENCAPSULATING_STRUCTURE_ORGANIZATION	GOBP_EXTERNAL_ENCAPSULATING_STRUCTURE_ORGANIZATION	159	-0.555741	-2.15482	2.10655e-07	8.50168e-05	7.75727e-05	565	tags=30%, list=6%, signal=28%	HAS1/LAMC1/ADAM10/VCAM1/COLGALT1/ETS1/CRTAP/LAMA5/ENG/B4GALT1/COL14A1/CAPNS1/ITGA5/PRDX4/COL6A1/MMP7/ELN/ADAM15/CAPN2/FKBP10/ADAMTS1/CTSL/TIMP2/SERPINH1/LCP1/TGFBI/COL4A2/FN1/COL17A1/TIMP1/A2M/SERPINB5/COL4A1/MMP2/THBS1/COL1A1/CCDC80/AEBP1/SERPINE1/COL1A2/FBLN1/BGN/SFRP2/SPARC/COL3A1/LUM/DCN
GOCC_CYTOSOLIC_RIBOSOME	GOCC_CYTOSOLIC_RIBOSOME	68	-0.703615	-2.44817	2.86926e-07	0.000106891	9.75314e-05	433	tags=57%, list=4%, signal=55%	RPS24/RPS23/RPL8/RSL24D1/RPL35A/RPL15/RPL23A/RPS7/RPS14/RPL18/RPS3/RPS4Y1/RPS27A/RPS18/RPS16/RPL36A/RPL5/RPL10A/RPS27/RPL26/RPS28/RPL37A/RPL10/RPS15A/RPL17/RPLP0/RPL11/RPS21/RPL21/RPL39/RPS3A/RPL7A/RPL3/RPS6/RPL37/RPS19/APOD/RPLP1/RPS4X
GOBP_KERATINIZATION	GOBP_KERATINIZATION	42	-0.766493	-2.4421	4.98153e-07	0.000172325	0.000157237	296	tags=43%, list=3%, signal=42%	CAPNS1/KRT15/DSG3/PKP1/KRT4/SPRR2D/CSTA/SPRR2A/CNFN/KRT17/KRT5/KRT14/KRT81/KRT6A/SPRR1B/KRT16/KRT13/SPRR3
GOBP_SKIN_DEVELOPMENT	GOBP_SKIN_DEVELOPMENT	143	-0.537854	-2.07434	1.13853e-06	0.000346513	0.000316173	465	tags=21%, list=5%, signal=20%	EPHA2/DSC3/LAMA5/IRF6/CAPNS1/KRT15/CLIC4/DSG3/CTSL/PKP1/KRT4/CD109/NME2/SPRR2D/CSTA/SPRR2A/CNFN/ANXA1/KRT17/COL1A1/KRT5/COL1A2/KRT14/KRT81/KRT6A/SPRR1B/COL3A1/KRT16/KRT13/SPRR3
GOBP_CELLULAR_RESPONSE_TO_ZINC_ION	GOBP_CELLULAR_RESPONSE_TO_ZINC_ION	11	-0.944607	-2.23407	1.14479e-06	0.000346513	0.000316173	40	tags=55%, list=0%, signal=54%	TSPO/MT1M/MT1G/MT1X/MT1E/MT2A
GOBP_REGULATION_OF_B_CELL_ACTIVATION	GOBP_REGULATION_OF_B_CELL_ACTIVATION	64	-0.673551	-2.308	1.24225e-06	0.000353896	0.000322909	170	tags=12%, list=2%, signal=12%	CD81/IGLC2/IGHA1/IGHG2/IGHG1/IGHG4/IGLC1/IGKC
GOBP_COTRANSLATIONAL_PROTEIN_TARGETING_TO_MEMBRANE	GOBP_COTRANSLATIONAL_PROTEIN_TARGETING_TO_MEMBRANE	70	-0.664443	-2.3201	1.40367e-06	0.000377666	0.000344598	433	tags=57%, list=4%, signal=55%	RPS24/RPS23/SEC61B/RPL8/RPL35A/RPL15/RPL23A/RPS7/RPS14/RPL18/RPS3/RPS4Y1/RPS27A/RPS18/SRP9/RPS16/RPL36A/RPL5/RPL10A/RPS27/RPL26/RPS28/RPL37A/RPL10/SSR2/RPS15A/RPL17/RPLP0/RPL11/RPS21/RPL21/RPL39/RPS3A/RPL7A/RPL3/RPS6/RPL37/RPS19/RPLP1/RPS4X
GOBP_CORNIFICATION	GOBP_CORNIFICATION	38	-0.766609	-2.3869	2.56732e-06	0.000654397	0.000597098	296	tags=45%, list=3%, signal=44%	CAPNS1/KRT15/DSG3/PKP1/KRT4/SPRR2D/CSTA/SPRR2A/KRT17/KRT5/KRT14/KRT81/KRT6A/SPRR1B/KRT16/KRT13/SPRR3
GOBP_PROTEIN_LOCALIZATION_TO_ENDOPLASMIC_RETICULUM	GOBP_PROTEIN_LOCALIZATION_TO_ENDOPLASMIC_RETICULUM	103	-0.574207	-2.1069	2.89412e-06	0.000679262	0.000619786	868	tags=49%, list=9%, signal=45%	RPS15/UBAC2/SPCS1/RPL35/BCAP31/RPL32/GABARAPL2/GBF1/RER1/RPS24/RPS23/SEC61B/KDELR2/RPL8/RPL35A/RPL15/RPL23A/RPS7/SEC61G/RPS14/RPL18/RPS3/RPS4Y1/RPS27A/RPS18/SRP9/RPS16/RPL36A/RPL5/RPL10A/RPS27/RPL26/RPS28/RPL37A/RPL10/RPS15A/RPL17/RPLP0/RPL11/RPS21/RPL21/RPL39/RPS3A/RPL7A/RPL3/RPS6/RPL37/RPS19/RPLP1/RPS4X
GOCC_LARGE_RIBOSOMAL_SUBUNIT	GOCC_LARGE_RIBOSOMAL_SUBUNIT	85	-0.624729	-2.216	2.94539e-06	0.000679262	0.000619786	801	tags=41%, list=8%, signal=38%	RPL35/MRPL9/RPL39L/RPL32/MRPL57/MRPL27/RPL8/RSL24D1/MRPL33/MRPL55/MRPL24/RPL35A/RPL15/RPL23A/MRPL43/NDUFAB1/MRPL36/RPL18/MRPL20/RPL36A/RPL5/RPL10A/RPL26/RPL37A/RPL10/RPL17/RPLP0/RPL11/RPL21/RPL39/RPL7A/MRPL51/RPL3/RPL37/RPLP1
GOBP_ESTABLISHMENT_OF_PROTEIN_LOCALIZATION_TO_ENDOPLASMIC_RETICULUM	GOBP_ESTABLISHMENT_OF_PROTEIN_LOCALIZATION_TO_ENDOPLASMIC_RETICULUM	82	-0.634397	-2.2533	3.52304e-06	0.000775549	0.000707642	433	tags=49%, list=4%, signal=47%	RPS24/RPS23/SEC61B/RPL8/RPL35A/RPL15/RPL23A/RPS7/SEC61G/RPS14/RPL18/RPS3/RPS4Y1/RPS27A/RPS18/SRP9/RPS16/RPL36A/RPL5/RPL10A/RPS27/RPL26/RPS28/RPL37A/RPL10/RPS15A/RPL17/RPLP0/RPL11/RPS21/RPL21/RPL39/RPS3A/RPL7A/RPL3/RPS6/RPL37/RPS19/RPLP1/RPS4X
GOBP_DIGESTIVE_SYSTEM_PROCESS	GOBP_DIGESTIVE_SYSTEM_PROCESS	37	0.745968	2.00702	4.28094e-06	0.000901416	0.000822488	374	tags=38%, list=4%, signal=37%	SERPINA3/TFF2/TFF3/TFF1/LIMA1/GCNT3/SOX9/TJP2/LDLR/PLS1/HIP1R/EZR/STK39/UGCG
GOBP_KERATINOCYTE_DIFFERENTIATION	GOBP_KERATINOCYTE_DIFFERENTIATION	87	-0.608184	-2.15308	4.62168e-06	0.00091635	0.000836114	465	tags=30%, list=5%, signal=29%	EPHA2/DSC3/IRF6/CAPNS1/KRT15/CLIC4/DSG3/CTSL/PKP1/KRT4/CD109/NME2/SPRR2D/CSTA/SPRR2A/CNFN/ANXA1/KRT17/KRT5/KRT14/KRT81/KRT6A/SPRR1B/KRT16/KRT13/SPRR3
GOBP_PEPTIDE_CROSS_LINKING	GOBP_PEPTIDE_CROSS_LINKING	14	-0.906724	-2.30169	4.73028e-06	0.00091635	0.000836114	90	tags=64%, list=1%, signal=64%	CSTA/FN1/ANXA1/THBS1/BGN/SPRR1B/COL3A1/DCN/SPRR3
GOBP_EPIDERMIS_DEVELOPMENT	GOBP_EPIDERMIS_DEVELOPMENT	169	-0.503794	-1.99412	7.74921e-06	0.00144344	0.00131705	487	tags=21%, list=5%, signal=20%	TRIOBP/EPHA2/DSC3/LAMA5/IRF6/CAPNS1/KRT15/CTNNB1/CLIC4/DSG3/CTSL/PKP1/KRT4/CD109/NME2/ATP2A2/SFRP4/SPRR2D/CSTA/SPRR2A/COL17A1/CNFN/ANXA1/FABP5/KRT17/KRT5/EMP1/KRT14/KRT81/KRT6A/SPRR1B/CRABP2/KRT16/KRT13/SPRR3
GOBP_NUCLEAR_TRANSCRIBED_MRNA_CATABOLIC_PROCESS_NONSENSE_MEDIATED_DECAY	GOBP_NUCLEAR_TRANSCRIBED_MRNA_CATABOLIC_PROCESS_NONSENSE_MEDIATED_DECAY	87	-0.599391	-2.12196	9.45945e-06	0.00167585	0.00152912	433	tags=45%, list=4%, signal=43%	GSPT1/RPS24/RPS23/RPL8/MAGOH/RPL35A/RPL15/RPL23A/RPS7/RPS14/RPL18/RPS3/RPS4Y1/RPS27A/RPS18/RPS16/RPL36A/RPL5/RPL10A/RPS27/RPL26/RPS28/RPL37A/RPL10/RPS15A/RPL17/RPLP0/RPL11/RPS21/RPL21/RPL39/RPS3A/RPL7A/RPL3/RPS6/RPL37/RPS19/RPLP1/RPS4X
GOBP_PROTEIN_TARGETING_TO_MEMBRANE	GOBP_PROTEIN_TARGETING_TO_MEMBRANE	134	-0.528725	-2.00943	9.68902e-06	0.00167585	0.00152912	491	tags=32%, list=5%, signal=31%	FYN/RPS24/RPS23/SEC61B/RPL8/RPL35A/RPL15/RPL23A/RPS7/SEC61G/RPS14/RPL18/RPS3/RPS4Y1/RPS27A/RPS18/SRP9/RPS16/RPL36A/RPL5/RPL10A/RPS27/RPL26/RPS28/RPL37A/RPL10/SSR2/RPS15A/RPL17/RPLP0/RPL11/RPS21/RPL21/RPL39/RPS3A/RPL7A/RPL3/RPS6/RPL37/PRNP/RPS19/RPLP1/RPS4X
GOBP_COLLAGEN_FIBRIL_ORGANIZATION	GOBP_COLLAGEN_FIBRIL_ORGANIZATION	20	-0.844957	-2.24302	1.08753e-05	0.00181617	0.00165715	450	tags=55%, list=5%, signal=53%	COLGALT1/CRTAP/COL14A1/FKBP10/SERPINH1/COL1A1/AEBP1/COL1A2/SFRP2/COL3A1/LUM
GOBP_CELL_RECOGNITION	GOBP_CELL_RECOGNITION	54	-0.670921	-2.25263	1.22752e-05	0.00198163	0.00180812	432	tags=22%, list=4%, signal=21%	CCT5/B4GALT1/EPHB3/CD81/IGLC2/IGHA1/IGHG2/CD9/IGHG1/IGHG4/IGLC1/IGKC
GOMF_GROWTH_FACTOR_BINDING	GOMF_GROWTH_FACTOR_BINDING	60	-0.651624	-2.23098	1.5562e-05	0.00243119	0.00221832	479	tags=30%, list=5%, signal=29%	TGFBR2/SEC61B/ENG/DUSP1/SHC1/COL6A1/CD109/LTBP2/RPS19/A2M/IGFBP3/COL4A1/S100A13/THBS1/COL1A1/COL1A2/COL3A1/IGFBP7
GOBP_RESPONSE_TO_CHEMOKINE	GOBP_RESPONSE_TO_CHEMOKINE	32	0.73849	1.93707	1.82505e-05	0.0027621	0.00252025	910	tags=38%, list=9%, signal=34%	TFF2/CCL20/CXCL5/CXCL8/CXCL1/CXCL2/CXCL3/CXCL6/STK39/HIF1A/ZC3H12A/GPR35
GOBP_ANATOMICAL_STRUCTURE_HOMEOSTASIS	GOBP_ANATOMICAL_STRUCTURE_HOMEOSTASIS	234	0.489319	1.67169	2.13228e-05	0.00312928	0.00285528	1632	tags=29%, list=17%, signal=25%	SERPINA3/CLDN18/TFF2/PIGR/TFF3/LYZ/TFF1/PDK4/CA2/VEGFA/TNFRSF11B/SPP1/ITGB6/SOX9/TJP2/POLD4/CLCN3/ATRX/AZGP1/OCLN/STK39/CHMP2B/ZG16B/USH1C/PRKCA/SLC1A1/GNL3/NABP2/TAOK1/DHX36/HIF1A/SMC5/RAD50/MAPK3/ACTG1/PPP1R10/RFC1/HNRNPU/SMG1/HNRNPC/HSP90AB1/ATR/CLDN12/PBLD/VSIG1/HSPB1/PTGES3/TCIRG1/KRAS/NF1/TNFRSF11A/SLC12A2/RIF1/TEP1/ADD1/GAA/ITGB1/SP100/SYK/TFRC/PRKAA1/GNAS/TCP1/HSP90AA1/DCTN1/LTF/HNRNPA1/Z…
GOBP_MICROTUBULE_BASED_PROCESS	GOBP_MICROTUBULE_BASED_PROCESS	436	0.436207	1.55769	2.54788e-05	0.00362923	0.00331145	2151	tags=34%, list=22%, signal=28%	TRIM54/SYNE2/DST/AKAP9/KTN1/SON/GBA2/DEFB1/HOOK2/LLGL2/GCC2/TRAK1/CCDC88A/RNF19A/TACC1/ATRX/SLC9A3R1/MAP7/VPS13A/EZR/APP/CSNK1D/OCLN/FBXW11/BICD1/CHMP2B/CHMP4C/DYNC1I2/NUMA1/CLIP1/KIF21A/KIF5B/MACF1/CLTC/TMF1/EML4/CCDC68/DYNC2H1/TRIP11/BMERB1/TAOK1/SENP6/CEP57/ARHGAP21/GOLGA2/HIF1A/DYNC1LI2/PAK1/DYNC1H1/MISP/SLC9B2/DIAPH1/ROCK1/RAB27B/GSK3B/AP3D1/SETD2/BICDL2/CFL1/SLC16A1/KIFC2/SS18/IFT172/MAP4/P…
GOCC_MITOCHONDRIAL_PROTEIN_CONTAINING_COMPLEX	GOCC_MITOCHONDRIAL_PROTEIN_CONTAINING_COMPLEX	217	-0.445662	-1.81177	2.63743e-05	0.00364945	0.0033299	1216	tags=35%, list=13%, signal=31%	SAMM50/TOMM7/TIMM23/NDUFS3/PAM16/MRPL40/NDUFS4/BCKDHA/MRPS36/MRPL34/MCUB/TOMM20/MRPS15/ATP5PO/MICU2/NDUFB6/COX5A/SDHA/ATP5F1A/ATP5MC2/MRPL9/PHB/MRPS14/NDUFA6/MTX2/TOMM22/TIMM8B/NDUFA11/TIMM17B/MRPS26/ATP5F1D/MTX1/NDUFA3/SMDT1/HSD17B10/MRPL57/TIMM10/NDUFC2/MT-ND1/NDUFB4/MT-ND2/MT-ND3/NDUFA12/TOMM5/COX6A1/NDUFS5/SDHC/MRPL27/TIMM17A/MRPL33/CHCHD10/MRPL55/BAX/UQCRQ/UQCRFS1/NDUFB2/MRPL24/UQCR10/ATP5PF…
GOBP_RNA_CATABOLIC_PROCESS	GOBP_RNA_CATABOLIC_PROCESS	311	-0.384679	-1.6212	2.78992e-05	0.00375322	0.00342459	883	tags=24%, list=9%, signal=23%	MAGOHB/RPS15/CNOT6/EIF4A3/PSMD9/RPL35/YBX3/PSMC2/PSMA7/DHX9/ELAVL1/CNOT6L/MAPKAPK2/RPL32/TNFRSF1B/NBDY/LSM5/PSMB2/PSMB3/TRIR/CARHSP1/GSPT1/LSM4/PSMB7/SET/LSM3/RPS24/RPS23/RPL8/E2F1/PSMD8/DEDD2/MAGOH/RPL35A/RPL15/RNASEH2C/PSMB5/RPL23A/RPS7/PSMA2/RPS14/RPL18/RPS3/PSMD4/RPS4Y1/RPS27A/RPS18/RPS16/RPL36A/RPL5/RPL10A/RPS27/RPL26/RPS28/RPL37A/RPL10/RPS15A/RPL17/PKP1/RPLP0/PSMB4/RPL11/RPS21/RPL21/RPL39/R…
GOMF_ANTIGEN_BINDING	GOMF_ANTIGEN_BINDING	29	-0.76203	-2.21004	4.20408e-05	0.0055028	0.00502098	310	tags=31%, list=3%, signal=30%	HLA-F/TSPAN4/IGLC2/IGHA1/IGHG2/IGHG1/IGHG4/IGLC1/IGKC
GOBP_RESPONSE_TO_CADMIUM_ION	GOBP_RESPONSE_TO_CADMIUM_ION	33	-0.734983	-2.21535	4.91338e-05	0.00592663	0.0054077	259	tags=27%, list=3%, signal=27%	SUMO1/MT-CYB/B2M/MT1M/MT1G/SPARC/MT1X/MT1E/MT2A
GOBP_ENDOMEMBRANE_SYSTEM_ORGANIZATION	GOBP_ENDOMEMBRANE_SYSTEM_ORGANIZATION	308	0.456613	1.58972	4.94821e-05	0.00592663	0.0054077	1862	tags=29%, list=19%, signal=24%	SPTBN1/VMP1/NDRG1/CLU/GOLGB1/AKAP9/TRAM1/CCDC47/HOOK2/GCC2/CLCN3/SQSTM1/SEC31A/SLC9A3R1/PLSCR1/CSNK1D/OPTN/ARFGEF1/UGCG/CHMP2B/CHMP4C/PRKCA/FNBP1L/BAIAP2L1/MYRF/SNX9/TMF1/SEC61A1/DYNC2H1/TRIP11/ATP8B1/LPIN1/OSBPL2/FER1L6/ARHGAP21/GOLGA2/TLCD2/ARL6IP1/GAK/MAPK3/ANKLE2/YWHAZ/GSN/AP3D1/RAB5B/ANO9/RAB2A/SHTN1/ANK3/PDCD6IP/CUL7/PPP2R1A/STX16/REEP6/MYO18A/SUN1/DNM2/RTN3/GOLGA5/IST1/FAM160A2/MPP5/RTN4/A…
GOBP_B_CELL_MEDIATED_IMMUNITY	GOBP_B_CELL_MEDIATED_IMMUNITY	63	-0.629012	-2.13746	4.97592e-05	0.00592663	0.0054077	338	tags=19%, list=3%, signal=19%	SUSD4/NECTIN2/C1QBP/CD81/IGLC2/IGHA1/C7/IGHG2/IGHG1/IGHG4/IGLC1/IGKC
GOBP_NEGATIVE_REGULATION_OF_VASCULATURE_DEVELOPMENT	GOBP_NEGATIVE_REGULATION_OF_VASCULATURE_DEVELOPMENT	48	-0.658692	-2.13303	5.01738e-05	0.00592663	0.0054077	540	tags=29%, list=6%, signal=28%	AMOT/EPHA2/NAXE/ATP2B4/KLF2/CTNNB1/NIBAN2/ADAMTS1/COL4A2/SERPINF1/THBS1/SERPINE1/SPARC/DCN
GOMF_EXTRACELLULAR_MATRIX_STRUCTURAL_CONSTITUENT_CONFERRING_TENSILE_STRENGTH	GOMF_EXTRACELLULAR_MATRIX_STRUCTURAL_CONSTITUENT_CONFERRING_TENSILE_STRENGTH	14	-0.877868	-2.22844	5.25265e-05	0.00594259	0.00542225	321	tags=57%, list=3%, signal=55%	COL14A1/COL6A1/COL4A2/COL17A1/COL4A1/COL1A1/COL1A2/COL3A1
GOBP_OXIDATIVE_PHOSPHORYLATION	GOBP_OXIDATIVE_PHOSPHORYLATION	104	-0.53453	-1.95527	5.30003e-05	0.00594259	0.00542225	1752	tags=60%, list=18%, signal=49%	COX4I1/CYCS/NDUFA8/MT-ATP8/ATP5MC3/DGUOK/UQCR11/PINK1/NDUFA2/GHITM/NDUFA9/DLD/SDHD/COX8A/SURF1/STOML2/COX7A2/NDUFS3/NDUFS4/CHCHD2/ATP5PO/MT-CO2/VCP/NDUFB6/COX5A/SLC25A33/SDHA/ATP5F1A/ATP5MC2/NDUFA6/BID/NDUFA11/ATP5F1D/NDUFA3/COX7B/NDUFC2/MT-ND1/NDUFB4/MT-ND2/MT-ND3/NDUFA12/COX6A1/NDUFS5/ISCU/COA6/SDHC/CHCHD10/UQCRQ/UQCRFS1/NDUFB2/UQCR10/ATP5PF/ATP5MG/NDUFB3/ATP5F1E/MT-ATP6/NDUFAB1/NDUFS6/MT-CO3/N…
GOBP_RESPONSE_TO_COPPER_ION	GOBP_RESPONSE_TO_COPPER_ION	24	-0.79996	-2.21435	5.53889e-05	0.00594259	0.00542225	173	tags=38%, list=2%, signal=37%	AQP1/MT-CYB/PRNP/S100A13/MT1M/MT1G/MT1X/MT1E/MT2A
GOBP_ZINC_ION_HOMEOSTASIS	GOBP_ZINC_ION_HOMEOSTASIS	20	-0.815104	-2.16377	5.61897e-05	0.00594259	0.00542225	40	tags=30%, list=0%, signal=30%	SLC39A4/MT1M/MT1G/MT1X/MT1E/MT2A
GOCC_CYTOSOLIC_LARGE_RIBOSOMAL_SUBUNIT	GOCC_CYTOSOLIC_LARGE_RIBOSOMAL_SUBUNIT	34	-0.726719	-2.22949	5.64441e-05	0.00594259	0.00542225	801	tags=71%, list=8%, signal=65%	RPL35/RPL39L/RPL32/RPL8/RSL24D1/RPL35A/RPL15/RPL23A/RPL18/RPL36A/RPL5/RPL10A/RPL26/RPL37A/RPL10/RPL17/RPLP0/RPL11/RPL21/RPL39/RPL7A/RPL3/RPL37/RPLP1
GOBP_ANTIGEN_RECEPTOR_MEDIATED_SIGNALING_PATHWAY	GOBP_ANTIGEN_RECEPTOR_MEDIATED_SIGNALING_PATHWAY	145	-0.488357	-1.87233	5.87721e-05	0.00605602	0.00552576	613	tags=18%, list=6%, signal=17%	PHPT1/PTPN22/PSMB2/PSMB3/SKP1/FYN/PSMB7/PSMD8/BAX/LIME1/UBE2N/NECTIN2/PSMB5/PSMA2/RPS3/PSMD4/CD81/PSMB4/IGLC2/IGHA1/PRNP/IGHG2/IGHG1/IGHG4/IGLC1/IGKC
GOBP_CELLULAR_RESPONSE_TO_COPPER_ION	GOBP_CELLULAR_RESPONSE_TO_COPPER_ION	15	-0.854409	-2.19121	6.53152e-05	0.00659004	0.00601301	173	tags=47%, list=2%, signal=46%	AQP1/PRNP/MT1M/MT1G/MT1X/MT1E/MT2A
GOBP_NEGATIVE_REGULATION_OF_LOCOMOTION	GOBP_NEGATIVE_REGULATION_OF_LOCOMOTION	154	-0.466688	-1.81916	6.70408e-05	0.0066261	0.00604591	459	tags=17%, list=5%, signal=16%	ADIPOR1/STRAP/IFITM1/ENG/DUSP1/CERS2/PTPRU/ATP2B4/ADAM15/CLIC4/BST2/NBL1/CXCL12/CLDN3/APOD/ARHGDIB/TIMP1/IGFBP3/SERPINF1/THBS1/SERPINE1/FBLN1/SFRP2/COL3A1/KRT16/DCN
GOBP_TRANSLATIONAL_INITIATION	GOBP_TRANSLATIONAL_INITIATION	142	-0.495487	-1.90658	6.95392e-05	0.00673557	0.0061458	442	tags=29%, list=5%, signal=28%	EIF1AX/RPS24/RPS23/RPL8/EIF3K/RPL35A/RPL15/EIF3L/EIF4A1/RPL23A/RPS7/RPS14/RPL18/RPS3/RPS4Y1/RPS27A/RPS18/RPS16/RPL36A/RPL5/RPL10A/RPS27/RPL26/RPS28/RPL37A/RPL10/RPS15A/RPL17/RPLP0/RPL11/RPS21/RPL21/RPL39/RPS3A/RPL7A/RPL3/RPS6/RPL37/RPS19/RPLP1/RPS4X
GOBP_REGULATION_OF_COMPLEMENT_ACTIVATION	GOBP_REGULATION_OF_COMPLEMENT_ACTIVATION	25	-0.782036	-2.18683	8.23062e-05	0.00781586	0.00713151	338	tags=44%, list=3%, signal=43%	SUSD4/C1QBP/CD81/IGLC2/C7/IGHG2/A2M/IGHG1/IGHG4/IGLC1/IGKC
GOBP_RESPONSE_TO_ZINC_ION	GOBP_RESPONSE_TO_ZINC_ION	23	-0.790883	-2.17612	8.96701e-05	0.00835139	0.00762014	153	tags=35%, list=2%, signal=34%	VCAM1/ASS1/MT1M/MT1G/KRT14/MT1X/MT1E/MT2A
GOCC_INNER_MITOCHONDRIAL_MEMBRANE_PROTEIN_COMPLEX	GOCC_INNER_MITOCHONDRIAL_MEMBRANE_PROTEIN_COMPLEX	106	-0.532928	-1.96458	9.14426e-05	0.00835578	0.00762415	1216	tags=47%, list=13%, signal=42%	SAMM50/TIMM23/NDUFS3/PAM16/NDUFS4/MCUB/ATP5PO/MICU2/NDUFB6/COX5A/SDHA/ATP5F1A/ATP5MC2/PHB/NDUFA6/MTX2/NDUFA11/TIMM17B/ATP5F1D/MTX1/NDUFA3/SMDT1/TIMM10/NDUFC2/MT-ND1/NDUFB4/MT-ND2/MT-ND3/NDUFA12/COX6A1/NDUFS5/SDHC/TIMM17A/CHCHD10/UQCRQ/UQCRFS1/NDUFB2/UQCR10/ATP5PF/ATP5MG/PHB2/NDUFB3/ATP5F1E/MT-ATP6/NDUFAB1/ATP5MPL/NDUFS6/NDUFA1/ATP5ME/MT-CYB
GOBP_POSITIVE_REGULATION_OF_CELL_ACTIVATION	GOBP_POSITIVE_REGULATION_OF_CELL_ACTIVATION	156	-0.478318	-1.85302	0.000101241	0.00893012	0.0081482	1027	tags=23%, list=11%, signal=21%	CD320/IRS2/CTLA4/LAMP1/RUNX1/HES1/XRCC6/NFATC2/MAP3K8/TNIP2/SELENOK/CDC42/HLA-G/CDKN1A/FLOT2/PTPN22/FYN/TGFBR2/VCAM1/NECTIN2/HLA-F/SOCS1/RPS3/HSPH1/RUNX3/CD81/IGLC2/IGHA1/IGF1/IGHG2/ANXA1/THBS1/IGHG1/IGHG4/IGLC1/IGKC
GOBP_PHAGOCYTOSIS_RECOGNITION	GOBP_PHAGOCYTOSIS_RECOGNITION	11	-0.904129	-2.13834	0.000101416	0.00893012	0.0081482	136	tags=64%, list=1%, signal=63%	IGLC2/IGHA1/IGHG2/IGHG1/IGHG4/IGLC1/IGKC
GOBP_TISSUE_HOMEOSTASIS	GOBP_TISSUE_HOMEOSTASIS	125	0.541829	1.74162	0.000103811	0.00894813	0.00816464	469	tags=18%, list=5%, signal=18%	SERPINA3/CLDN18/TFF2/PIGR/TFF3/LYZ/TFF1/PDK4/CA2/VEGFA/TNFRSF11B/SPP1/ITGB6/SOX9/TJP2/CLCN3/AZGP1/OCLN/STK39/ZG16B/USH1C/PRKCA/SLC1A1
GOBP_ATP_SYNTHESIS_COUPLED_ELECTRON_TRANSPORT	GOBP_ATP_SYNTHESIS_COUPLED_ELECTRON_TRANSPORT	70	-0.596715	-2.08361	0.000106765	0.00894813	0.00816464	1580	tags=66%, list=16%, signal=55%	MT-CO1/COX4I1/CYCS/NDUFA8/DGUOK/UQCR11/PINK1/NDUFA2/GHITM/NDUFA9/DLD/SDHD/COX8A/NDUFS3/NDUFS4/CHCHD2/MT-CO2/NDUFB6/COX5A/SDHA/NDUFA6/BID/NDUFA11/NDUFA3/COX7B/NDUFC2/MT-ND1/NDUFB4/MT-ND2/MT-ND3/NDUFA12/COX6A1/NDUFS5/ISCU/COA6/SDHC/UQCRQ/UQCRFS1/NDUFB2/UQCR10/NDUFB3/NDUFAB1/NDUFS6/MT-CO3/NDUFA1/MT-CYB
GOBP_COMPLEMENT_ACTIVATION	GOBP_COMPLEMENT_ACTIVATION	30	-0.730609	-2.15863	0.000107163	0.00894813	0.00816464	338	tags=47%, list=3%, signal=45%	SERPING1/CFD/SUSD4/C1QBP/CD81/IGLC2/IGHA1/C7/IGHG2/A2M/IGHG1/IGHG4/IGLC1/IGKC
GOBP_HUMORAL_IMMUNE_RESPONSE_MEDIATED_BY_CIRCULATING_IMMUNOGLOBULIN	GOBP_HUMORAL_IMMUNE_RESPONSE_MEDIATED_BY_CIRCULATING_IMMUNOGLOBULIN	25	-0.774505	-2.16577	0.000111325	0.00913807	0.00833794	338	tags=44%, list=3%, signal=43%	SUSD4/C1QBP/CD81/IGLC2/IGHA1/C7/IGHG2/IGHG1/IGHG4/IGLC1/IGKC
GOBP_REGULATION_OF_MICROVILLUS_ORGANIZATION	GOBP_REGULATION_OF_MICROVILLUS_ORGANIZATION	10	0.894477	1.9056	0.000115072	0.00917101	0.008368	1009	tags=90%, list=10%, signal=81%	CDHR2/PLD1/PLS1/EZR/CDHR5/USH1C/KLF5/ATP8B1/VIL1
GOCC_ACTIN_CYTOSKELETON	GOCC_ACTIN_CYTOSKELETON	272	0.460809	1.59747	0.000115513	0.00917101	0.008368	1953	tags=39%, list=20%, signal=32%	ONECUT2/SPTBN1/TPM2/SHROOM3/MYO6/LIMA1/MYL6/AHNAK/LLGL2/CDH1/SLC9A3R1/CD2AP/PLS1/EZR/CGN/ARHGEF5/AKAP13/SEPTIN9/SPECC1/LPP/BAIAP2L1/MACF1/SNX9/MYH14/SPTAN1/CTNNA1/ARHGAP21/UTRN/CORO1B/JUP/PAK1/EHBP1/MISP/VILL/ANG/PPP1R9A/ACTG1/CDC42EP4/SPPL2B/MICALL2/GSN/FBLIM1/ARPC1A/EPB41L2/PTPN12/CFL1/NEB/PDLIM5/MARCKS/IQGAP2/PDCD6IP/MLPH/HNRNPC/MYO9A/PLEKHH2/MYO18A/MYO7B/VIL1/CDC42BPB/PAWR/SCIN/ARHGAP32/LASP1…
GOBP_MICROTUBULE_BASED_MOVEMENT	GOBP_MICROTUBULE_BASED_MOVEMENT	155	0.50804	1.66501	0.000128531	0.0100399	0.00916085	1688	tags=34%, list=17%, signal=28%	SYNE2/DST/KTN1/DEFB1/TRAK1/SLC9A3R1/VPS13A/APP/FBXW11/BICD1/DYNC1I2/KIF21A/KIF5B/TMF1/DYNC2H1/TRIP11/ARHGAP21/HIF1A/DYNC1LI2/DYNC1H1/SLC9B2/RAB27B/AP3D1/BICDL2/KIFC2/IFT172/MAP4/RAB6A/HNRNPU/COPG1/MAPK8IP3/HSPB1/PCM1/SFPQ/ASH1L/DYNLL2/KIF3B/SPAG16/SORD/PAFAH1B1/KIF16B/RAB1A/KIF12/DNAH14/LRPPRC/MAP2/PURA/KIF3A/AP3B1/ACTR2/OFD1/DNAH5
GOCC_APICAL_PART_OF_CELL	GOCC_APICAL_PART_OF_CELL	200	0.492182	1.66268	0.00013418	0.0103148	0.00941165	1302	tags=30%, list=13%, signal=27%	DUOX2/SLC44A4/ERBB3/CFTR/DUOXA2/CDHR2/ATP1B1/SHROOM3/CA2/CEACAM7/CEACAM6/GP2/LDLR/PATJ/SLC9A3R1/PLD1/SLC22A18/HIP1R/EZR/APP/SLC6A20/CDHR5/OCLN/STK39/NUMB/SLC38A1/IGFBP2/USH1C/MTDH/SLC1A1/DYNC2H1/ATP1A1/ATP8B1/LMO7/CASR/SLC9B2/PRKCI/RAB27B/JAG1/EXOC1/SLC16A1/PTPRH/SLC7A11/AMN/PARD6B/MYO7B/HSP90AB1/KCNK1/PCM1/TCIRG1/LRP1/TNIK/SHROOM1/SLC12A2/MPP5/NHS/NPC1L1/SLC15A1/ANXA13/SORBS2
GOBP_BONE_RESORPTION	GOBP_BONE_RESORPTION	32	0.702135	1.84171	0.000142099	0.0107529	0.00981135	1396	tags=34%, list=14%, signal=30%	CLDN18/PDK4/CA2/TNFRSF11B/SPP1/PRKCA/TCIRG1/NF1/TNFRSF11A/SYK/TFRC
GOBP_MICROTUBULE_BASED_TRANSPORT	GOBP_MICROTUBULE_BASED_TRANSPORT	104	0.547521	1.72392	0.000156952	0.0116129	0.0105961	1757	tags=37%, list=18%, signal=30%	SYNE2/DST/TRAK1/SLC9A3R1/APP/FBXW11/BICD1/DYNC1I2/KIF5B/DYNC2H1/TRIP11/ARHGAP21/HIF1A/DYNC1H1/RAB27B/AP3D1/BICDL2/IFT172/RAB6A/HNRNPU/COPG1/MAPK8IP3/HSPB1/PCM1/SFPQ/DYNLL2/KIF3B/SPAG16/PAFAH1B1/RAB1A/LRPPRC/MAP2/PURA/KIF3A/AP3B1/OFD1/DNAH5/ARMCX3
GOBP_VIRAL_GENE_EXPRESSION	GOBP_VIRAL_GENE_EXPRESSION	146	-0.479859	-1.84723	0.000160111	0.0116129	0.0105961	821	tags=32%, list=8%, signal=29%	SPCS1/RPL35/HPN/DHX9/RPL32/POLR2F/POLR2L/USF2/RPS24/RPS23/RPL8/RPL35A/RPL15/EIF3L/RPL23A/RPS7/RPS14/RPL18/RPS3/RPS4Y1/RPS27A/RPS18/RPS16/RPL36A/RPL5/RPL10A/RPS27/RPL26/RPS28/RPL37A/RPL10/RPS15A/RPL17/RPLP0/RPL11/RPS21/RPL21/RPL39/RPS3A/RPL7A/RPL3/RPS6/RPL37/RPS19/RPLP1/RPS4X
GOBP_CELLULAR_RESPONSE_TO_CADMIUM_ION	GOBP_CELLULAR_RESPONSE_TO_CADMIUM_ION	21	-0.797653	-2.14109	0.000160658	0.0116129	0.0105961	259	tags=29%, list=3%, signal=28%	SUMO1/MT1M/MT1G/MT1X/MT1E/MT2A
GOCC_CELL_CORTEX	GOCC_CELL_CORTEX	173	0.493514	1.6417	0.000168164	0.0118839	0.0108434	2094	tags=41%, list=22%, signal=33%	SPTBN1/DST/TNFAIP2/SHROOM3/CLTA/MYO6/LLGL2/TRAK1/CTNND1/ASPH/ADD3/CDH1/PLS1/HIP1R/EZR/LAMC2/AKAP13/SEPTIN9/NUMA1/FNBP1L/SNX9/SPTAN1/UTRN/DYNC1H1/MISP/FRYL/PPP1R9A/NCL/EXOC7/GSN/EXOC1/EPB41L2/MARCKS/EPS8/PARD6B/ENO1/MLPH/PLEKHH2/SCIN/ARHGAP32/LASP1/SHROOM1/EPB41/PCLO/CSNK1G2/MYH9/EXOC3L4/RAI14/PTK2/PAFAH1B1/RTKN/RAB10/RND1/DCTN1/SPIRE2/TSC1/C2CD5/ACTR2/PSEN1/SEPTIN11/FER/DCDC2/PARD3/CTTN/MAEA/ERC1…
GOBP_ACTIN_FILAMENT_BASED_PROCESS	GOBP_ACTIN_FILAMENT_BASED_PROCESS	420	0.424028	1.51061	0.000169315	0.0118839	0.0108434	2094	tags=38%, list=22%, signal=31%	SPTBN1/TLN1/TPM2/SYNE2/SHROOM3/MYO6/AKAP9/LIMA1/MYL6/KRT8/FGD4/CXCL1/GBA2/LLGL2/CCDC88A/SDC4/ADD3/KCNE3/SLC9A3R1/CD2AP/PLS1/HIP1R/EZR/ARHGEF5/ARHGAP12/TESK1/DIAPH2/ARFGEF1/PKP2/HSP90B1/ARHGAP18/AKAP13/SPECC1/USH1C/FGD6/FNBP1L/BAIAP2L1/SNX9/MYH14/ATP1A1/TAOK1/SPTAN1/CTNNA1/CFLAR/GRB2/CORO1B/JUP/PAK1/EHBP1/VILL/ANG/PRKCI/PPP1R9A/DIAPH1/TRIM27/ACTG1/ROCK1/CDC42EP4/ARHGDIA/MICALL2/GSN/PHACTR2/PRKAR1A…
GOBP_LYMPHOCYTE_MEDIATED_IMMUNITY	GOBP_LYMPHOCYTE_MEDIATED_IMMUNITY	109	-0.512626	-1.91358	0.000172983	0.0119679	0.01092	386	tags=15%, list=4%, signal=14%	TUBB/SUSD4/NECTIN2/HLA-F/C1QBP/TUBB4B/CD81/IGLC2/IGHA1/B2M/C7/IGHG2/IGHG1/IGHG4/IGLC1/IGKC
GOBP_NUCLEAR_TRANSCRIBED_MRNA_CATABOLIC_PROCESS	GOBP_NUCLEAR_TRANSCRIBED_MRNA_CATABOLIC_PROCESS	161	-0.461219	-1.80454	0.000180082	0.0122836	0.0112081	883	tags=31%, list=9%, signal=29%	MAGOHB/RPS15/CNOT6/EIF4A3/RPL35/CNOT6L/RPL32/NBDY/LSM5/GSPT1/LSM4/LSM3/RPS24/RPS23/RPL8/MAGOH/RPL35A/RPL15/RPL23A/RPS7/RPS14/RPL18/RPS3/RPS4Y1/RPS27A/RPS18/RPS16/RPL36A/RPL5/RPL10A/RPS27/RPL26/RPS28/RPL37A/RPL10/RPS15A/RPL17/RPLP0/RPL11/RPS21/RPL21/RPL39/RPS3A/RPL7A/RPL3/RPS6/RPL37/RPS19/RPLP1/RPS4X
GOBP_EPIDERMAL_CELL_DIFFERENTIATION	GOBP_EPIDERMAL_CELL_DIFFERENTIATION	118	-0.516656	-1.91322	0.000210264	0.0139653	0.0127425	487	tags=25%, list=5%, signal=24%	TRIOBP/EPHA2/DSC3/IRF6/CAPNS1/KRT15/CTNNB1/CLIC4/DSG3/CTSL/PKP1/KRT4/CD109/NME2/SFRP4/SPRR2D/CSTA/SPRR2A/CNFN/ANXA1/KRT17/KRT5/KRT14/KRT81/KRT6A/SPRR1B/KRT16/KRT13/SPRR3
GOBP_ERBB_SIGNALING_PATHWAY	GOBP_ERBB_SIGNALING_PATHWAY	102	0.554159	1.73915	0.000210504	0.0139653	0.0127425	1739	tags=36%, list=18%, signal=30%	PIGR/ERBB3/AGR2/EREG/CCDC88A/SOX9/HBEGF/HIP1R/PTPRR/PRKCA/ERRFI1/ERBIN/GRB2/PTPN12/PIK3C2A/MVP/IFI6/AREG/VIL1/SNX6/CDC37/BRAF/RTN4/REPS2/HGS/GRB7/PTK2/KIF16B/PDPK1/HSP90AA1/PTK6/RAB7A/DUSP3/PSEN1/SOCS4/PTPN3/EPN1
GOMF_ACTIN_BINDING	GOMF_ACTIN_BINDING	241	0.455915	1.56057	0.00022016	0.0144086	0.013147	1876	tags=36%, list=19%, signal=30%	SPTBN1/TLN1/TPM2/SYNE2/DST/SHROOM3/MYO6/LIMA1/FGD4/CCDC88A/AFDN/EPS8L2/ADD3/PLS1/HIP1R/EZR/EPS8L3/CGN/IMPACT/DIAPH2/PLEC/CORO2A/P4HB/USH1C/BAIAP2L1/MACF1/COBLL1/MYH14/SPTAN1/CTNNA1/UTRN/CORO1B/MISP/VILL/ANG/PPP1R9A/DIAPH1/MICALL2/GSN/PHACTR2/SHTN1/ARPC1A/EPB41L2/CFL1/NEB/PDLIM5/MARCKS/IQGAP2/EPS8/HNRNPU/INF2/MLPH/MYO9A/PLEKHH2/MYO18A/MYO7B/VIL1/PAWR/SCIN/LASP1/SHROOM1/EPB41/ADD1/MYH9/FMN1/HOOK1/R…
GOCC_ENDOPLASMIC_RETICULUM_GOLGI_INTERMEDIATE_COMPARTMENT_MEMBRANE	GOCC_ENDOPLASMIC_RETICULUM_GOLGI_INTERMEDIATE_COMPARTMENT_MEMBRANE	49	0.630994	1.77752	0.000230523	0.0148856	0.0135823	939	tags=24%, list=10%, signal=22%	SERPINA1/VMP1/CSNK1D/CD59/KDELR1/TRIP11/GOLGA2/PRRG4/RAB2A/F5/TAP2/AREG
GOBP_REGULATION_OF_HUMORAL_IMMUNE_RESPONSE	GOBP_REGULATION_OF_HUMORAL_IMMUNE_RESPONSE	30	-0.71265	-2.10556	0.00024466	0.0155906	0.0142255	338	tags=37%, list=3%, signal=36%	SUSD4/C1QBP/CD81/IGLC2/C7/IGHG2/A2M/IGHG1/IGHG4/IGLC1/IGKC
GOBP_FC_RECEPTOR_MEDIATED_STIMULATORY_SIGNALING_PATHWAY	GOBP_FC_RECEPTOR_MEDIATED_STIMULATORY_SIGNALING_PATHWAY	61	-0.595098	-2.06012	0.0002512	0.0157768	0.0143954	136	tags=15%, list=1%, signal=15%	ARPC5/FYN/ACTB/IGLC2/IGHG2/IGHG1/IGHG4/IGLC1/IGKC
GOMF_CYTOKINE_ACTIVITY	GOMF_CYTOKINE_ACTIVITY	64	0.601122	1.7717	0.000256238	0.0157768	0.0143954	655	tags=27%, list=7%, signal=25%	CCL20/CXCL5/CXCL8/VEGFA/TNFRSF11B/CXCL1/GDF15/CXCL2/SPP1/FAM3D/CXCL3/IL32/CXCL6/NAMPT/AIMP1/GRN/IL18
GOBP_NEUTROPHIL_MIGRATION	GOBP_NEUTROPHIL_MIGRATION	44	0.657639	1.82676	0.000257354	0.0157768	0.0143954	375	tags=25%, list=4%, signal=24%	CCL20/CXCL5/CXCL8/CXCL1/CXCL2/CXCL3/GP2/LGALS3/CXCL6/SAA1/BSG
GOCC_CELL_LEADING_EDGE	GOCC_CELL_LEADING_EDGE	242	0.471323	1.61408	0.000260731	0.015784	0.014402	1623	tags=32%, list=17%, signal=28%	DUOX2/SPTBN1/TLN1/SYNE2/DUOXA2/DST/MYO6/PTPRK/LIMA1/FGD4/CTNND1/CCDC88A/EPS8L2/CLCN3/LMO4/CDH1/SLC9A3R1/SH3RF1/CD2AP/HIP1R/EZR/EPS8L3/APP/OCLN/ARHGAP18/P4HB/PKN2/CLIP1/FGD6/MACF1/SNX9/TESC/RAPH1/CTNNA1/VEZT/GABRA2/PABPC1/CORO1B/PAK1/PRKCI/PPP1R9A/DIAPH1/ROCK1/GSN/SHTN1/CFL1/IQGAP2/EPS8/PLEKHH2/ABI1/DNM2/GABRE/VIL1/CDC42BPB/PSD4/APC/NHS/MYH9/SORBS2/PACSIN2/FRMD4B/RAB5A/ITGB1/CTTNBP2NL/PAFAH1B1/PLE…
GOBP_ACTIVATION_OF_IMMUNE_RESPONSE	GOBP_ACTIVATION_OF_IMMUNE_RESPONSE	247	-0.396565	-1.65284	0.000265161	0.015854	0.0144659	809	tags=19%, list=8%, signal=18%	PSMD9/CDC42/PSMC2/PHB/MUC13/PSMA7/BRK1/PRKACA/MUC21/PHPT1/PTPN22/SERPING1/PSMB2/ARPC5/PSMB3/SKP1/FYN/CFD/PSMB7/IFI16/PSMD8/BAX/LIME1/UBE2N/SUSD4/NECTIN2/ACTB/C1QBP/PSMB5/PSMA2/RPS3/PSMD4/CD81/PSMB4/IGLC2/MUC4/IGHA1/PRNP/C7/IGHG2/MUC5AC/A2M/MUC16/IGHG1/IGHG4/IGLC1/IGKC
GOBP_MEMBRANE_INVAGINATION	GOBP_MEMBRANE_INVAGINATION	44	-0.650831	-2.07689	0.00027547	0.0161491	0.0147351	136	tags=18%, list=1%, signal=18%	IGLC2/IGHA1/IGHG2/THBS1/IGHG1/IGHG4/IGLC1/IGKC
GOBP_INNATE_IMMUNE_RESPONSE	GOBP_INNATE_IMMUNE_RESPONSE	444	-0.331613	-1.44334	0.000276766	0.0161491	0.0147351	725	tags=15%, list=7%, signal=14%	MUC13/UNC93B1/PSMA7/DHX9/PRKACA/MUC21/IFNGR2/CXCL16/OAS1/PTPN22/SERPING1/PSMB2/IRAK1/PSMB3/SOCS3/SKP1/FYN/CFD/PSMB7/VCAM1/IFITM1/TUBB/IFI16/PSMD8/IRF6/INAVA/GAPDH/SUSD4/NECTIN2/PHB2/HLA-F/C1QBP/PSMB5/SOCS1/SUMO1/PSMA2/TUBB4B/PSMD4/ADAM15/IFIT1/HMGB2/BST2/ASS1/PSMB4/RPL39/IGLC2/MUC4/IGHA1/SPON2/B2M/RPS19/C7/IGHG2/MUC5AC/A2M/PPP1R14B/ANXA1/MUC16/RARRES2/VIM/KRT16/IGHG1/IGHG4/IGLC1/MT2A/IGKC
GOBP_NEGATIVE_REGULATION_OF_GROWTH	GOBP_NEGATIVE_REGULATION_OF_GROWTH	130	-0.470319	-1.78202	0.0002844	0.016397	0.0149613	934	tags=21%, list=10%, signal=19%	SERTAD3/RBBP7/SIPA1/TSPYL2/PHB/CCDC85B/CDKN1A/SLIT3/BCL11A/PPT1/NKD1/TGFBR2/ADIPOR1/RGS2/SPART/ADAM15/BTG1/BST2/DCBLD2/CDKN2A/HSPA1A/MT1M/MT1G/SFRP2/MT1X/MT1E/MT2A
GOCC_ORGANELLE_INNER_MEMBRANE	GOCC_ORGANELLE_INNER_MEMBRANE	382	-0.353425	-1.49809	0.000294133	0.0165788	0.0151271	1226	tags=27%, list=13%, signal=25%	SURF1/TMEM126B/SAMM50/MTLN/TIMM23/STOML2/NNT/COX7A2/NDUFS3/PAM16/CRLS1/UNC50/MRPL40/SFXN3/NDUFS4/NDUFAF3/MRPS36/MRPL34/MTCH1/ACADVL/MCUB/COA3/MRPS15/ATP5PO/TOR1AIP1/COX11/AURKAIP1/MT-CO2/MICU2/NDUFB6/COX5A/SLC25A33/MFSD10/SDHA/ATP5F1A/ATP5MC2/MRPL9/RCC1L/CNP/PHB/MRPS14/NDUFA6/MTX2/ALDH18A1/EMD/TMEM70/PLSCR3/TIMM8B/SIGMAR1/NDUFA11/HIGD2A/TMEM14B/TIMM17B/MRPS26/ATP5F1D/MTX1/NDUFA3/SMDT1/MRPL57/TIMM…
GOMF_CADHERIN_BINDING	GOMF_CADHERIN_BINDING	243	0.464038	1.58949	0.000296498	0.0165788	0.0151271	1829	tags=38%, list=19%, signal=32%	OLFM4/SPTBN1/RPS26/TLN1/NDRG1/LIMA1/KTN1/AHNAK/S100P/CTNND1/CLINT1/AFDN/TJP2/ARGLU1/EPS8L2/LRRFIP1/CDH1/CD2AP/EZR/CSNK1D/CGN/CEMIP2/PLEC/PKP2/BSG/ARHGAP18/CHMP2B/NUMB/SEPTIN9/PKN2/FNBP1L/KIF5B/BAIAP2L1/MACF1/SNX9/COBLL1/EIF3E/HDLBP/SPTAN1/CTNNA1/GOLGA2/PKP3/CORO1B/JUP/LARP1/KRT18/YWHAZ/EIF4G2/GIGYF2/SHTN1/EIF2A/PTPRH/GOLGA3/PDLIM5/ANK3/CLIC1/ENO1/HSPA5/HSP90AB1/ABI1/ZC3H15/TES/LASP1/IST1/PFKP/RTN…
GOBP_MULTICELLULAR_ORGANISMAL_HOMEOSTASIS	GOBP_MULTICELLULAR_ORGANISMAL_HOMEOSTASIS	245	0.460018	1.57374	0.000297822	0.0165788	0.0151271	1396	tags=26%, list=14%, signal=23%	SERPINA3/CLDN18/TFF2/PIGR/TFF3/LYZ/TFF1/CFTR/SLC40A1/PDK4/CA2/LCN2/VEGFA/TNFRSF11B/DDIT3/SPP1/G0S2/STAT3/ITGB6/SOX9/TJP2/CLCN3/ACHE/AZGP1/STAT6/ALDH1A1/OCLN/STK39/UGCG/OGT/ZG16B/USH1C/PRKCA/SLC1A1/GATM/EIF4G1/LPIN1/PLAC8/IL18/DYNC1H1/KDM3A/ACTG1/PRKAR1A/PRKACB/LGR4/EXT1/CLDN12/PBLD/VSIG1/HSPB1/TCIRG1/KRAS/PRKAR2A/NF1/APC/TNFRSF11A/SLC12A2/ADD1/NAPEPLD/FA2H/ITGB1/KDM6B/SYK/TFRC
GOBP_REGULATION_OF_TISSUE_REMODELING	GOBP_REGULATION_OF_TISSUE_REMODELING	34	0.682135	1.80165	0.000316602	0.0174239	0.0158983	1396	tags=35%, list=14%, signal=30%	CLDN18/PDK4/CA2/TNFRSF11B/SPP1/PRKCA/IL18/ROCK1/NF1/TNFRSF11A/SYK/TFRC
GOCC_EXTERNAL_SIDE_OF_PLASMA_MEMBRANE	GOCC_EXTERNAL_SIDE_OF_PLASMA_MEMBRANE	109	-0.500025	-1.86655	0.000365503	0.0198891	0.0181476	543	tags=20%, list=6%, signal=19%	FCGRT/AMOT/TGFBR2/VCAM1/ENG/B4GALT1/HLA-F/ITGA5/CAPN2/IGLC2/CXCL12/IGHA1/B2M/PRNP/IGHG2/CLEC2B/ANXA1/THBS1/IGHG1/IGHG4/IGLC1/IGKC
GOBP_RESPIRATORY_ELECTRON_TRANSPORT_CHAIN	GOBP_RESPIRATORY_ELECTRON_TRANSPORT_CHAIN	84	-0.54326	-1.9361	0.000375471	0.0202045	0.0184354	1752	tags=57%, list=18%, signal=47%	COX4I1/CYCS/NDUFA8/SDHB/DGUOK/UQCR11/PINK1/NDUFA2/GHITM/NDUFA9/DLD/SDHD/GPD2/COX8A/AIFM2/NDUFS3/NDUFS4/CHCHD2/MT-CO2/NDUFB6/COX5A/SDHA/NDUFA6/BID/NDUFA11/NDUFA3/COX7B/NDUFC2/MT-ND1/NDUFB4/MT-ND2/MT-ND3/NDUFA12/COX6A1/NDUFS5/ISCU/COA6/SDHC/UQCRQ/UQCRFS1/NDUFB2/UQCR10/NDUFB3/NDUFAB1/NDUFS6/MT-CO3/NDUFA1/MT-CYB
GOBP_RESPONSE_TO_INORGANIC_SUBSTANCE	GOBP_RESPONSE_TO_INORGANIC_SUBSTANCE	282	-0.370801	-1.54635	0.000381914	0.0203254	0.0185457	491	tags=13%, list=5%, signal=13%	FYN/BMP7/VCAM1/FSTL3/ETS1/NCSTN/DUSP1/PRDX2/SELENOM/ATP2B4/KLF2/SUMO1/RPS3/PRDX3/CLIC4/CAPN2/CACYBP/PTGES/AQP1/UCP2/MT-CYB/ASS1/B2M/PRNP/CCND1/SYT8/SERPINF1/ANXA1/S100A13/THBS1/COL1A1/MT1M/MT1G/KRT14/SPARC/MT1X/MT1E/MT2A
GOCC_CYTOSOLIC_SMALL_RIBOSOMAL_SUBUNIT	GOCC_CYTOSOLIC_SMALL_RIBOSOMAL_SUBUNIT	31	-0.669369	-1.97321	0.000394151	0.0207486	0.0189319	433	tags=55%, list=4%, signal=53%	RPS24/RPS23/RPS7/RPS14/RPS3/RPS4Y1/RPS27A/RPS18/RPS16/RPS27/RPS28/RPS15A/RPS21/RPS3A/RPS6/RPS19/RPS4X
GOMF_CXCR_CHEMOKINE_RECEPTOR_BINDING	GOMF_CXCR_CHEMOKINE_RECEPTOR_BINDING	10	0.873199	1.86027	0.000418027	0.0217689	0.0198628	302	tags=70%, list=3%, signal=68%	TFF2/CXCL5/CXCL8/CXCL1/CXCL2/CXCL3/CXCL6
GOBP_IMMUNE_RESPONSE_REGULATING_SIGNALING_PATHWAY	GOBP_IMMUNE_RESPONSE_REGULATING_SIGNALING_PATHWAY	226	-0.385809	-1.57664	0.00045648	0.0235184	0.0214592	809	tags=19%, list=8%, signal=18%	PSMD9/CDC42/PSMC2/HLA-G/PPP3CA/MUC13/PSMA7/BRK1/PRKACA/MUC21/PHPT1/PTPN22/PSMB2/ARPC5/PSMB3/SKP1/CTSH/FYN/PSMB7/PSMD8/BAX/LIME1/SHC1/UBE2N/NECTIN2/ACTB/PSMB5/PSMA2/RPS3/PSMD4/CD81/PSMB4/IGLC2/MUC4/IGHA1/PRNP/IGHG2/MUC5AC/MUC16/IGHG1/IGHG4/IGLC1/IGKC
GOBP_CELLULAR_RESPONSE_TO_INORGANIC_SUBSTANCE	GOBP_CELLULAR_RESPONSE_TO_INORGANIC_SUBSTANCE	114	-0.4868	-1.81841	0.000462523	0.0235789	0.0215144	259	tags=13%, list=3%, signal=13%	FSTL3/NCSTN/SUMO1/CLIC4/CACYBP/AQP1/B2M/PRNP/SYT8/SERPINF1/MT1M/MT1G/MT1X/MT1E/MT2A
GOBP_CARTILAGE_DEVELOPMENT	GOBP_CARTILAGE_DEVELOPMENT	77	-0.548097	-1.93592	0.000471384	0.0236083	0.0215411	483	tags=18%, list=5%, signal=17%	BMP7/TGFBR2/SNAI2/RUNX3/SERPINH1/TGFBI/EPYC/EFEMP1/TIMP1/COL1A1/BGN/SFRP2/LUM/MGP
GOBP_RIBOSOME_ASSEMBLY	GOBP_RIBOSOME_ASSEMBLY	47	-0.609147	-1.97081	0.000472848	0.0236083	0.0215411	454	tags=30%, list=5%, signal=29%	NOP53/RSL24D1/C1QBP/RPL23A/RPS14/MRPL20/RPL5/RPS27/RPS28/RPL10/RPLP0/RPL11/RPL3/RPS19
GOCC_NUCLEAR_SPECK	GOCC_NUCLEAR_SPECK	306	0.431954	1.50635	0.000488907	0.0238532	0.0217646	2410	tags=36%, list=25%, signal=28%	TCIM/MECOM/NFKBIZ/CCNL1/SON/PNISR/ACIN1/SRRM2/KMT2E/AFDN/SRPK1/ATP6V0A1/ASCC3/SF3B2/PNN/CCNL2/CDK12/NAMPT/ARHGAP18/RBM25/THOC2/RBM39/FNBP4/ZNF638/BCLAF1/DDX42/YTHDC1/TRIP11/ERBIN/ZNF217/DHX36/DDX39B/BAZ2A/HIF1A/SMC5/PRPF40A/RSRC1/SDCBP2/ZC3H13/SRSF11/PPIG/HNRNPU/RBM27/ZC3H18/TAP2/NSRP1/TRIP12/EP400/SRSF1/SREK1/PSME4/REXO4/THRAP3/SFPQ/PLAG1/CBX4/SRRM1/PIAS1/KAT6A/PRPF6/VIRMA/NRIP1/CDC40/PACSIN2/SN…
GOBP_ORGANIC_CYCLIC_COMPOUND_CATABOLIC_PROCESS	GOBP_ORGANIC_CYCLIC_COMPOUND_CATABOLIC_PROCESS	416	-0.336027	-1.4418	0.000491598	0.0238532	0.0217646	898	tags=21%, list=9%, signal=20%	ENTPD8/MAGOHB/RPS15/DERA/VCP/CNOT6/EIF4A3/PSMD9/RPL35/YBX3/MGAT1/PSMC2/CNP/NUDT4/PSMA7/DHX9/ELAVL1/CNOT6L/MAPKAPK2/RPL32/TNFRSF1B/AHCY/NBDY/ITPA/LSM5/PSMB2/PSMB3/TRIR/CARHSP1/GSPT1/LSM4/PSMB7/SET/LSM3/RPS24/RPS23/RPL8/E2F1/PSMD8/BAX/DEDD2/MAGOH/RPL35A/RPL15/RNASEH2C/PSMB5/RPL23A/RPS7/PSMA2/RPS14/RPL18/RPS3/PSMD4/RPS4Y1/COMT/RPS27A/RPS18/RPS16/RPL36A/RPL5/RPL10A/RPS27/HMGB2/RPL26/RPS28/RPL37A/RPL1…
GOBP_NEUTROPHIL_CHEMOTAXIS	GOBP_NEUTROPHIL_CHEMOTAXIS	39	0.658837	1.78541	0.000495814	0.0238532	0.0217646	375	tags=26%, list=4%, signal=25%	CCL20/CXCL5/CXCL8/CXCL1/CXCL2/CXCL3/LGALS3/CXCL6/SAA1/BSG
GOBP_CONNECTIVE_TISSUE_DEVELOPMENT	GOBP_CONNECTIVE_TISSUE_DEVELOPMENT	104	-0.490789	-1.79527	0.000497455	0.0238532	0.0217646	520	tags=16%, list=5%, signal=16%	ARID5B/BMP7/TGFBR2/SPART/SNAI2/SELENOM/RUNX3/SERPINH1/TGFBI/EPYC/EFEMP1/TIMP1/COL1A1/BGN/SFRP2/LUM/MGP
GOBP_CHONDROITIN_SULFATE_PROTEOGLYCAN_BIOSYNTHETIC_PROCESS	GOBP_CHONDROITIN_SULFATE_PROTEOGLYCAN_BIOSYNTHETIC_PROCESS	15	-0.813341	-2.08588	0.000508051	0.0241225	0.0220103	240	tags=20%, list=2%, signal=20%	CHPF/BGN/DCN
GOBP_INTESTINAL_ABSORPTION	GOBP_INTESTINAL_ABSORPTION	17	0.783848	1.84432	0.000516579	0.0242892	0.0221625	1267	tags=59%, list=13%, signal=51%	LIMA1/GCNT3/TJP2/LDLR/PLS1/EZR/UGCG/VIL1/EPB41/NPC1L1
GOBP_REGULATION_OF_IMMUNE_RESPONSE	GOBP_REGULATION_OF_IMMUNE_RESPONSE	429	-0.336187	-1.45892	0.000527923	0.0245839	0.0224314	809	tags=17%, list=8%, signal=16%	PSMD9/CDC42/PSMC2/HLA-G/PPP3CA/PHB/MUC13/PSMA7/BRK1/DHX9/PRKACA/MUC21/IFNGR2/TNFRSF1B/PHPT1/PTPN22/SERPING1/PSMB2/ARPC5/PSMB3/RAC2/SOCS3/SKP1/CTSH/FYN/CFD/PSMB7/VCAM1/IFITM1/IFI16/FKBP1A/PSMD8/BAX/LIME1/SHC1/UBE2N/SUSD4/NECTIN2/HLA-F/ACTB/C1QBP/PSMB5/SOCS1/SUMO1/PSMA2/RPS3/PSMD4/HMGB2/CD81/PSMB4/IGLC2/MUC4/IGHA1/B2M/PRNP/RPS19/C7/IGHG2/MUC5AC/COL17A1/CLEC2B/A2M/ANXA1/COL1A1/MUC16/COL1A2/COL3A1/IG…
GOBP_CHROMATIN_ORGANIZATION	GOBP_CHROMATIN_ORGANIZATION	477	0.401341	1.44464	0.000539019	0.0246458	0.0224878	2270	tags=32%, list=23%, signal=26%	RESF1/MECOM/VEGFA/SMARCC2/BAZ2B/KMT2E/SOX9/JMJD1C/CHD9/RSF1/SRPK1/BPTF/ATRX/BRD4/KAT6B/ZBTB7A/TAF7/CHD2/KMT2C/CHD7/NSD3/ARID1B/OGT/KMT2A/PRKCA/TOP1/MBIP/GATAD1/UBR5/CHD8/KANSL1/BAZ2A/PHF20L1/UBR2/ZNFX1/IWS1/PWWP3A/SMARCA4/PAK1/SMARCC1/TBL1XR1/ARID4A/TSPYL1/KDM3A/MAPK3/ZNHIT1/MLLT6/SETD2/MPHOSPH8/CHD1/SMARCA1/SMARCA5/SHPRH/HNRNPU/TRIP12/SPTY2D1/EP400/HNRNPC/PHF14/NIPBL/PSME4/ATAD2B/SETD5/ZFPM1/BRW…
GOBP_REGULATION_OF_BONE_REMODELING	GOBP_REGULATION_OF_BONE_REMODELING	23	0.746876	1.85567	0.000539429	0.0246458	0.0224878	1396	tags=43%, list=14%, signal=37%	CLDN18/PDK4/CA2/TNFRSF11B/SPP1/PRKCA/NF1/TNFRSF11A/SYK/TFRC
GOBP_ADAPTIVE_IMMUNE_RESPONSE_BASED_ON_SOMATIC_RECOMBINATION_OF_IMMUNE_RECEPTORS_BUILT_FROM_IMMUNOGLOBULIN_SUPERFAMILY_DOMAINS	GOBP_ADAPTIVE_IMMUNE_RESPONSE_BASED_ON_SOMATIC_RECOMBINATION_OF_IMMUNE_RECEPTORS_BUILT_FROM_IMMUNOGLOBULIN_SUPERFAMILY_DOMAINS	117	-0.484697	-1.79192	0.000571439	0.0258643	0.0235996	338	tags=13%, list=3%, signal=13%	SUSD4/NECTIN2/HLA-F/C1QBP/CD81/IGLC2/IGHA1/B2M/C7/IGHG2/ANXA1/IGHG1/IGHG4/IGLC1/IGKC
GOBP_POSITIVE_REGULATION_OF_IMMUNE_RESPONSE	GOBP_POSITIVE_REGULATION_OF_IMMUNE_RESPONSE	323	-0.352374	-1.49794	0.000631222	0.0283056	0.0258272	809	tags=17%, list=8%, signal=16%	PSMD9/CDC42/PSMC2/HLA-G/PHB/MUC13/PSMA7/BRK1/DHX9/PRKACA/MUC21/PHPT1/PTPN22/SERPING1/PSMB2/ARPC5/PSMB3/SKP1/FYN/CFD/PSMB7/IFI16/PSMD8/BAX/LIME1/UBE2N/SUSD4/NECTIN2/HLA-F/ACTB/C1QBP/PSMB5/PSMA2/RPS3/PSMD4/HMGB2/CD81/PSMB4/IGLC2/MUC4/IGHA1/B2M/PRNP/RPS19/C7/IGHG2/MUC5AC/A2M/ANXA1/MUC16/IGHG1/IGHG4/IGLC1/IGKC
GOMF_COLLAGEN_BINDING	GOMF_COLLAGEN_BINDING	34	-0.667436	-2.04762	0.00065031	0.0288941	0.0263641	435	tags=41%, list=4%, signal=39%	CRTAP/COL14A1/COL6A1/CTSL/CTSB/SERPINH1/TGFBI/FN1/THBS1/AEBP1/SPARCL1/SPARC/LUM/DCN
GOBP_B_CELL_ACTIVATION	GOBP_B_CELL_ACTIVATION	123	-0.465656	-1.73625	0.000659871	0.0290523	0.0265085	362	tags=10%, list=4%, signal=10%	VCAM1/BAX/PHB2/CD81/BST2/IGLC2/IGHA1/IGHG2/IGHG1/IGHG4/IGLC1/IGKC
GOBP_PROTEIN_TARGETING	GOBP_PROTEIN_TARGETING	302	-0.364026	-1.52237	0.000668436	0.0291643	0.0266107	1193	tags=28%, list=12%, signal=25%	SAE1/TOMM7/HTRA2/TIMM23/HMGCL/PAM16/ZDHHC20/HRAS/ICMT/PEX19/GSTK1/INPP5K/UBE2J2/RHOU/GDI1/GABARAP/TOMM20/TSPO/CIB1/SORT1/RPS15/HAX1/SPCS1/RPL35/BCAP31/TOMM22/BID/TIMM8B/RPL32/GIPC1/TIMM17B/SCP2/ECH1/RAC2/TIMM10/UBE2L3/FYN/TOMM5/RPS24/RPS23/SEC61B/RPL8/TIMM17A/RPL35A/RPL15/RPL23A/RPS7/SEC61G/RPS14/PDCD5/RPL18/RPS3/RPS4Y1/RPS27A/RPS18/SRP9/RPS16/RPL36A/RPL5/RPL10A/RPS27/RPL26/RPS28/RPL37A/RPL10/SSR…
GOBP_PROTEIN_LOCALIZATION_TO_CELL_PERIPHERY	GOBP_PROTEIN_LOCALIZATION_TO_CELL_PERIPHERY	197	0.459706	1.54982	0.000743214	0.0321374	0.0293234	2196	tags=38%, list=23%, signal=30%	SPTBN1/GOLGA4/ATP1B1/AGR2/CCDC88A/AFDN/SQSTM1/CDH1/SLC9A3R1/LGALS3/MAP7/PLS1/EZR/OPTN/PKP2/BSG/NUMB/NUMA1/RAMP1/KIF5B/SLC1A1/MACF1/CLTC/TESC/PKP3/JUP/STX7/MISP/GAK/PRKCI/KRT18/ROCK1/EFR3A/VPS35/EPB41L2/ANK3/AMN/SLMAP/VIL1/RAB3B/ATP2C2/LRP1/NSF/GRIPAP1/SMURF1/TNIK/EPB41/MPP5/GGA3/IKBKB/LYPLA1/ITGB1/TSPAN15/PICALM/NECTIN3/RAB10/PDPK1/APPL1/VTI1B/C2CD5/RAB7A/RAB40C/FCHO2/RAB40B/RAB11FIP2/FAM126A/FAM…
GOBP_EPITHELIAL_CELL_DIFFERENTIATION	GOBP_EPITHELIAL_CELL_DIFFERENTIATION	321	-0.352812	-1.50098	0.000781248	0.0333077	0.0303913	528	tags=15%, list=5%, signal=15%	TGFB1I1/MYADM/TRIOBP/BMP7/EPHA2/RAB25/DSC3/ID2/ENG/B4GALT1/IRF6/CAPNS1/KLF2/KRT15/ID1/CTNNB1/CLIC4/BTG1/DSG3/RAB13/CTSL/FLNA/CTSB/PKP1/KRT4/CD109/NME2/CCND1/CLDN3/SFRP4/SPRR2D/CSTA/SPRR2A/COL4A1/CNFN/ANXA1/KRT17/ID3/SERPINE1/KRT5/KRT14/KRT81/KRT6A/SPRR1B/VIM/TAGLN/KRT16/KRT13/SPRR3
GOBP_ESTABLISHMENT_OF_PROTEIN_LOCALIZATION_TO_ORGANELLE	GOBP_ESTABLISHMENT_OF_PROTEIN_LOCALIZATION_TO_ORGANELLE	395	-0.330528	-1.41078	0.000784033	0.0333077	0.0303913	1216	tags=26%, list=13%, signal=24%	SAMM50/HYAL2/SAE1/TOMM7/HTRA2/TIMM23/HMGCL/PAM16/CSE1L/BAD/PEX19/GSTK1/CALM3/PKIA/CCT7/TRIM28/UBE2J2/CCT4/CCT3/HIKESHI/BCL2L11/RHOU/LAMP1/ATAD1/TOMM20/TSPO/PMAIP1/SORT1/RPS15/HAX1/SNF8/SPCS1/RPL35/PPP3CA/BCAP31/NOLC1/IPO5/TOMM22/BID/ELAVL1/CDKN1A/TIMM8B/RPL32/VPS28/TIMM17B/SCP2/ECH1/RAC2/TIMM10/UBE2L3/TOMM5/NEURL1B/RPS24/CCT5/RAN/RPS23/SEC61B/ARC/RPL8/TIMM17A/E2F1/BAX/RPL35A/RPL15/DNAJA1/PHB2/RPL…
GOMF_CHEMOKINE_RECEPTOR_BINDING	GOMF_CHEMOKINE_RECEPTOR_BINDING	24	0.742996	1.86166	0.000795317	0.0334932	0.0305605	392	tags=42%, list=4%, signal=40%	TFF2/CCL20/CXCL5/CXCL8/CXCL1/CXCL2/DEFB1/CXCL3/CXCL6/JAK1
GOBP_ADAPTIVE_IMMUNE_RESPONSE	GOBP_ADAPTIVE_IMMUNE_RESPONSE	171	-0.419369	-1.66201	0.000872311	0.036419	0.0332301	356	tags=10%, list=4%, signal=10%	LIME1/SUSD4/NECTIN2/HLA-F/C1QBP/CTSL/CD81/IGLC2/IGHA1/B2M/C7/IGHG2/ANXA1/IGHG1/IGHG4/IGLC1/IGKC
GOBP_TRANSPORT_ALONG_MICROTUBULE	GOBP_TRANSPORT_ALONG_MICROTUBULE	93	0.542745	1.68764	0.00091453	0.0378553	0.0345407	2026	tags=40%, list=21%, signal=32%	SYNE2/DST/TRAK1/APP/FBXW11/BICD1/DYNC1I2/KIF5B/DYNC2H1/TRIP11/ARHGAP21/HIF1A/DYNC1H1/RAB27B/AP3D1/BICDL2/IFT172/RAB6A/HNRNPU/COPG1/MAPK8IP3/HSPB1/PCM1/SFPQ/DYNLL2/KIF3B/PAFAH1B1/RAB1A/LRPPRC/MAP2/PURA/KIF3A/AP3B1/ARMCX3/SOD1/IFT80/STK11
GOBP_MICROTUBULE_CYTOSKELETON_ORGANIZATION	GOBP_MICROTUBULE_CYTOSKELETON_ORGANIZATION	316	0.419621	1.46259	0.000985861	0.0404621	0.0369192	2151	tags=33%, list=22%, signal=27%	TRIM54/SYNE2/DST/AKAP9/SON/GBA2/HOOK2/LLGL2/GCC2/CCDC88A/RNF19A/TACC1/ATRX/MAP7/EZR/CSNK1D/OCLN/FBXW11/BICD1/CHMP2B/CHMP4C/NUMA1/CLIP1/CLTC/EML4/CCDC68/BMERB1/TAOK1/SENP6/CEP57/GOLGA2/DYNC1LI2/PAK1/DYNC1H1/MISP/ROCK1/GSK3B/SETD2/CFL1/SLC16A1/KIFC2/SS18/IFT172/MAP4/PDCD6IP/HNRNPU/CUL7/PARD6B/RASSF7/SBDS/WEE1/PCM1/TACC2/PCNT/DVL1/CLIP2/CEP126/APC/KIF3B/SPAG16/CAPN6/ZNF207/CCDC57/NCKAP5/MYH9/MAP9/HO…
GOCC_MICROTUBULE	GOCC_MICROTUBULE	229	0.453508	1.54808	0.000997635	0.0406012	0.0370462	1921	tags=33%, list=20%, signal=27%	TRIM54/NDRG1/SCTR/DST/SHROOM3/HOOK2/MAP7/CSNK1D/BOD1L1/MTUS1/SAA1/KLC4/FBXW11/BICD1/ARHGAP18/SEPTIN9/DYNC1I2/NUMA1/CLIP1/KIF21A/KIF5B/MACF1/HID1/CLTC/EML4/DYNC2H1/CSPP1/CEP57/GOLGA2/DYNC1LI2/XIAP/DYNC1H1/MISP/EIF3A/SHTN1/KIFC2/MAP4/HNRNPU/DNM2/PCNT/DVL1/CLIP2/APC/DYNLL2/KIF3B/SHROOM1/BCL10/CAPN6/ZNF207/CCDC57/ARFGEF2/NCKAP5/MAP9/HOOK1/FHDC1/PAFAH1B1/CKAP5/KIF16B/TCP1/DCTN1/KIF12/DNAH14/HOOK3/LRPP…
GOCC_CORNIFIED_ENVELOPE	GOCC_CORNIFIED_ENVELOPE	20	-0.751434	-1.99475	0.00105562	0.0422624	0.0385619	195	tags=50%, list=2%, signal=49%	DSC3/DSG3/PKP1/SPRR2D/CSTA/SPRR2A/CNFN/ANXA1/SPRR1B/SPRR3
GOBP_NEGATIVE_REGULATION_OF_CELL_SUBSTRATE_ADHESION	GOBP_NEGATIVE_REGULATION_OF_CELL_SUBSTRATE_ADHESION	30	-0.670225	-1.98022	0.0010559	0.0422624	0.0385619	220	tags=27%, list=2%, signal=26%	ACTN4/ADAM15/APOD/CDKN2A/THBS1/COL1A1/SERPINE1/FBLN1
GOBP_ACTIN_FILAMENT_ORGANIZATION	GOBP_ACTIN_FILAMENT_ORGANIZATION	246	0.438069	1.49843	0.0010809	0.0425901	0.0388609	2087	tags=38%, list=21%, signal=31%	SPTBN1/TPM2/SHROOM3/MYO6/LIMA1/GBA2/CCDC88A/SDC4/ADD3/CD2AP/PLS1/HIP1R/EZR/ARHGEF5/ARHGAP12/TESK1/DIAPH2/ARFGEF1/HSP90B1/ARHGAP18/USH1C/BAIAP2L1/SNX9/SPTAN1/CTNNA1/GRB2/CORO1B/PAK1/VILL/ANG/PRKCI/PPP1R9A/DIAPH1/TRIM27/ACTG1/ROCK1/CDC42EP4/MICALL2/GSN/SHTN1/ARPC1A/CFL1/NEB/MARCKS/IQGAP2/EPS8/PLEKHH2/MYO7B/ABI1/VIL1/PAWR/SMAD3/SCIN/FAT1/SHROOM1/MCU/ELMO3/ADD1/TTC17/SORBS2/FMN1/FHDC1/ICAM1/AP1AR/RUF…
GOBP_SULFUR_COMPOUND_CATABOLIC_PROCESS	GOBP_SULFUR_COMPOUND_CATABOLIC_PROCESS	27	-0.688283	-1.97096	0.00108168	0.0425901	0.0388609	27	tags=19%, list=0%, signal=19%	HEXB/AHCY/BGN/LUM/DCN
GOBP_CYTOSKELETON_DEPENDENT_INTRACELLULAR_TRANSPORT	GOBP_CYTOSKELETON_DEPENDENT_INTRACELLULAR_TRANSPORT	119	0.511334	1.64065	0.0010995	0.0429427	0.0391827	1659	tags=35%, list=17%, signal=30%	SYNE2/DST/MYO6/HOOK2/TRAK1/CCDC88A/APP/FBXW11/BICD1/DYNC1I2/FNBP1L/KIF5B/DYNC2H1/TRIP11/ARHGAP21/HIF1A/DYNC1H1/CCDC186/RAB27B/AP3D1/BICDL2/IFT172/RAB6A/HNRNPU/COPG1/MYO7B/MAPK8IP3/HSPB1/PCM1/SFPQ/TANC2/DYNLL2/KIF3B/HOOK1/PAFAH1B1/RAB1A/HOOK3/LRPPRC/MAP2/PURA/KIF3A/AP3B1
GOMF_ATPASE_ACTIVITY	GOMF_ATPASE_ACTIVITY	290	0.433275	1.50581	0.00114032	0.0438323	0.0399944	2305	tags=37%, list=24%, signal=29%	CFTR/RNF213/MYO6/MYL6/EIF4A2/DDX21/ACIN1/CHD9/BPTF/ATRX/ABCF1/ASCC3/TMEM30B/CHD2/ATP10B/CHD7/KIF21A/KIF5B/DDX42/MACF1/DDX18/MYH14/DYNC2H1/ATP1A1/ATP8B1/CHD8/YME1L1/DHX36/DDX39B/RAD50/ZNFX1/SMARCA4/DYNC1H1/RFC1/CHD1/LONP2/SMARCA1/KIFC2/SMARCA5/SHPRH/TAP2/LONP1/SETX/ATP7B/DDX27/SPG7/EP400/HSPA5/MYO7B/ATAD2B/HELZ/ATP2C2/SNRNP200/ATP5F1C/NSF/DICER1/KIF3B/PSMC5/ATP11A/DHX16/DDX24/HELZ2/ABCD3/DDX5/MYH9…
GOBP_DEFENSE_RESPONSE_TO_BACTERIUM	GOBP_DEFENSE_RESPONSE_TO_BACTERIUM	87	-0.500195	-1.77078	0.00114038	0.0438323	0.0399944	177	tags=16%, list=2%, signal=16%	HMGB2/AQP1/RPL39/IGLC2/IGHA1/RPS19/IGHG2/SERPINE1/RARRES2/KRT6A/IGHG1/IGHG4/IGLC1/IGKC
GOBP_ESTABLISHMENT_OF_ORGANELLE_LOCALIZATION	GOBP_ESTABLISHMENT_OF_ORGANELLE_LOCALIZATION	272	0.432558	1.49954	0.00117939	0.0449747	0.0410367	2247	tags=36%, list=23%, signal=28%	SERPINA1/SYNE2/MYO6/LLGL2/TRAK1/SEC31A/SLC9A3R1/EZR/CSNK1D/TESK1/FBXW11/BICD1/CHMP2B/CHMP4C/CD59/NUMA1/FNBP1L/KIF5B/EML4/TRIP11/ARHGAP21/GOLGA2/HIF1A/DYNC1H1/MISP/CCDC186/FAM91A1/YWHAZ/RAB27B/AP3D1/MX1/BICDL2/TFG/F5/CFL1/MAP4/RAB6A/HNRNPU/COPG1/AREG/MLPH/MYO7B/DNM2/SDAD1/PCM1/TCIRG1/UNC13D/TANC2/NSF/ARFGAP3/KIF3B/MYH9/ITGB1/SYK/PAFAH1B1/SCFD1/AP1AR/PICALM/PDPK1/BECN1/RAB1A/DCTN1/HOOK3/SPIRE2/PIBF…
GOBP_SPERMATID_DIFFERENTIATION	GOBP_SPERMATID_DIFFERENTIATION	49	0.593851	1.67289	0.00119557	0.0452353	0.0412745	1461	tags=29%, list=15%, signal=24%	SPINK1/ABHD2/CFTR/DEFB1/SRPK1/AFF4/TMF1/CEP57/KDM3A/PSME4/SPAG16/HOOK1/PAFAH1B1/NECTIN3
GOCC_RESPIRATORY_CHAIN_COMPLEX	GOCC_RESPIRATORY_CHAIN_COMPLEX	60	-0.553663	-1.89559	0.00126487	0.0468214	0.0427217	891	tags=47%, list=9%, signal=43%	MT-CO2/NDUFB6/COX5A/SDHA/NDUFA6/NDUFA11/NDUFA3/COX7B/NDUFC2/MT-ND1/NDUFB4/MT-ND2/MT-ND3/NDUFA12/COX6A1/NDUFS5/COA6/SDHC/UQCRQ/UQCRFS1/NDUFB2/UQCR10/NDUFB3/NDUFAB1/NDUFS6/MT-CO3/NDUFA1/MT-CYB
GOMF_ACTIN_FILAMENT_BINDING	GOMF_ACTIN_FILAMENT_BINDING	117	0.503686	1.61688	0.00126587	0.0468214	0.0427217	1876	tags=43%, list=19%, signal=35%	TLN1/TPM2/SYNE2/SHROOM3/MYO6/LIMA1/AFDN/ADD3/PLS1/HIP1R/EZR/CORO2A/USH1C/MACF1/MYH14/CTNNA1/UTRN/CORO1B/MISP/VILL/PPP1R9A/MICALL2/GSN/SHTN1/ARPC1A/CFL1/NEB/MARCKS/IQGAP2/MYO18A/MYO7B/VIL1/SCIN/LASP1/SHROOM1/ADD1/MYH9/NEBL/MYOM1/MICAL1/TNNC1/TPM3/ACTR2/CLMN/ACTR3C/EEF2/SVIL/ESPN/POF1B/CTTN
GOBP_REGULATION_OF_LYMPHOCYTE_ACTIVATION	GOBP_REGULATION_OF_LYMPHOCYTE_ACTIVATION	199	-0.401708	-1.60641	0.00126649	0.0468214	0.0427217	1027	tags=20%, list=11%, signal=18%	CD320/IRS2/CTLA4/LAMP1/RUNX1/HES1/XRCC6/NFATC2/MAP3K8/TNIP2/SELENOK/TWSG1/CDC42/HLA-G/CDKN1A/FLOT2/TNFRSF1B/PTPN22/RAC2/FYN/TGFBR2/VCAM1/PRDX2/PRELID1/HLA-F/SOCS1/RPS3/HSPH1/RUNX3/CD81/IGLC2/IGHA1/PRNP/IGF1/IGHG2/ANXA1/IGHG1/IGHG4/IGLC1/IGKC
GOBP_PLASMA_MEMBRANE_ORGANIZATION	GOBP_PLASMA_MEMBRANE_ORGANIZATION	55	0.599996	1.72365	0.00132301	0.0485403	0.0442901	1355	tags=40%, list=14%, signal=35%	SPTBN1/NDRG1/CLU/SLC9A3R1/PLSCR1/UGCG/FNBP1L/BAIAP2L1/MYRF/SNX9/ATP8B1/OSBPL2/FER1L6/TLCD2/GSN/ANO9/ANK3/DNM2/MPP5/MYH9/FA2H/PACSIN2
GOBP_EPITHELIAL_STRUCTURE_MAINTENANCE	GOBP_EPITHELIAL_STRUCTURE_MAINTENANCE	16	0.779258	1.81828	0.00140632	0.0512091	0.0467252	207	tags=31%, list=2%, signal=31%	SERPINA3/TFF2/TFF3/TFF1/SOX9
GOMF_GLYCOSAMINOGLYCAN_BINDING	GOMF_GLYCOSAMINOGLYCAN_BINDING	71	-0.522326	-1.82284	0.0014677	0.0530455	0.0484008	714	tags=34%, list=7%, signal=32%	LRPAP1/HDGF/SLIT3/LXN/FGF1/BMP7/TGFBR2/ENG/C1QBP/PPIA/MMP7/PDCD5/LGR6/ADAMTS1/VEGFB/LTBP2/PRNP/EPYC/REG4/FN1/THBS1/CCDC80/BGN/DCN
GOCC_INTERMEDIATE_FILAMENT	GOCC_INTERMEDIATE_FILAMENT	38	-0.635807	-1.97963	0.00152361	0.0546581	0.0498723	262	tags=32%, list=3%, signal=31%	KRT15/PKP1/KRT4/NME2/KRT17/KRT5/KRT14/KRT81/KRT6A/VIM/KRT16/KRT13
GOBP_NEGATIVE_REGULATION_OF_SIGNALING_RECEPTOR_ACTIVITY	GOBP_NEGATIVE_REGULATION_OF_SIGNALING_RECEPTOR_ACTIVITY	27	-0.673567	-1.92881	0.00160155	0.0570316	0.0520379	889	tags=22%, list=9%, signal=20%	CBLC/SLURP2/LRPAP1/LY6H/LY6E/MTRNR2L12
GOBP_RESPONSE_TO_XENOBIOTIC_STIMULUS	GOBP_RESPONSE_TO_XENOBIOTIC_STIMULUS	47	0.620741	1.73471	0.00163228	0.057373	0.0523494	1053	tags=36%, list=11%, signal=32%	CYP3A5/CES2/CMBL/AHR/AKR7A3/NQO1/GSTA1/CYP2S1/AOC1/CYP2C18/AADAC/HNF4A/SULT1B1/POR/CRYZ/HSP90AB1/PTGES3
GOCC_SMALL_RIBOSOMAL_SUBUNIT	GOCC_SMALL_RIBOSOMAL_SUBUNIT	57	-0.562529	-1.909	0.00163619	0.057373	0.0523494	433	tags=44%, list=4%, signal=42%	DDX3X/MRPS36/MRPS15/RPS15/MRPS14/MRPS26/RPS24/RPS23/MRPS12/RPS7/RPS14/RPS3/RPS4Y1/RPS27A/RPS18/RPS16/MRPS24/RPS27/RPS28/RPS15A/RPS21/RPS3A/RPS6/RPS19/RPS4X
GOCC_CELL_CELL_JUNCTION	GOCC_CELL_CELL_JUNCTION	265	0.417791	1.44255	0.00164667	0.057373	0.0523494	1853	tags=37%, list=19%, signal=30%	CLDN18/TLN1/NDRG1/ATP1B1/SHROOM3/VEGFA/PTPRK/KRT8/AHI1/SAV1/STARD10/CLDN10/AHNAK/CTNND1/AFDN/TJP2/PATJ/ADD3/CDH1/CD2AP/PNN/APP/CGN/OCLN/USP53/PKP2/PKN2/MTDH/BAIAP2L1/ATP1A1/CTNNA1/TMEM47/VEZT/PKP3/AOC1/GRB2/JUP/PAK1/PRKCI/FGFR4/KRT18/ACTG1/CDC42EP4/EIF4G2/JAG1/MICALL2/MAGI1/MAGI3/PDLIM5/ANK3/PDCD6IP/PARD6B/CLDN23/CLDN12/CDC42BPB/GJB1/ASH1L/PERP/CLDN2/PLEKHA7/APC/FAT1/SHROOM1/MPP5/NHS/MARVELD3/CDH…
GOBP_FC_RECEPTOR_SIGNALING_PATHWAY	GOBP_FC_RECEPTOR_SIGNALING_PATHWAY	131	-0.453185	-1.71996	0.00166005	0.0574257	0.0523975	809	tags=19%, list=8%, signal=18%	PSMD9/CDC42/PSMC2/PPP3CA/PSMA7/BRK1/PSMB2/ARPC5/PSMB3/SKP1/FYN/PSMB7/PSMD8/SHC1/ACTB/PSMB5/PSMA2/PSMD4/PSMB4/IGLC2/IGHG2/IGHG1/IGHG4/IGLC1/IGKC
GOBP_PROTEIN_LOCALIZATION_TO_PLASMA_MEMBRANE	GOBP_PROTEIN_LOCALIZATION_TO_PLASMA_MEMBRANE	172	0.472872	1.57116	0.00168982	0.0576394	0.0525925	2196	tags=40%, list=23%, signal=32%	SPTBN1/GOLGA4/ATP1B1/AGR2/CCDC88A/AFDN/SQSTM1/CDH1/SLC9A3R1/LGALS3/MAP7/PLS1/EZR/OPTN/PKP2/BSG/NUMB/RAMP1/KIF5B/MACF1/CLTC/TESC/PKP3/JUP/STX7/GAK/PRKCI/KRT18/ROCK1/EFR3A/VPS35/ANK3/AMN/SLMAP/VIL1/RAB3B/ATP2C2/LRP1/NSF/GRIPAP1/SMURF1/TNIK/MPP5/GGA3/IKBKB/LYPLA1/ITGB1/TSPAN15/PICALM/NECTIN3/RAB10/PDPK1/APPL1/VTI1B/C2CD5/RAB7A/RAB40C/FCHO2/RAB40B/RAB11FIP2/FAM126A/FAM126B/PPFIA1/SEC16A/GGA1/GOPC/DLG…
GOMF_LIPASE_ACTIVITY	GOMF_LIPASE_ACTIVITY	50	0.591266	1.68024	0.0017155	0.0576394	0.0525925	1359	tags=28%, list=14%, signal=24%	ABHD2/CES2/MGLL/LIPH/PLD1/ABHD3/PLBD1/CASR/AADAC/PLA2G10/NCEH1/PNPLA2/NAPEPLD/LYPLA1
GOCC_APICAL_PLASMA_MEMBRANE	GOCC_APICAL_PLASMA_MEMBRANE	163	0.479006	1.58283	0.0017214	0.0576394	0.0525925	1302	tags=30%, list=13%, signal=26%	DUOX2/SLC44A4/ERBB3/CFTR/CDHR2/ATP1B1/SHROOM3/CEACAM7/CEACAM6/GP2/PATJ/SLC9A3R1/PLD1/SLC22A18/HIP1R/EZR/SLC6A20/CDHR5/OCLN/STK39/SLC38A1/IGFBP2/MTDH/SLC1A1/ATP1A1/ATP8B1/LMO7/CASR/SLC9B2/PRKCI/RAB27B/JAG1/EXOC1/SLC16A1/PTPRH/AMN/PARD6B/HSP90AB1/KCNK1/TCIRG1/TNIK/SHROOM1/SLC12A2/MPP5/NHS/NPC1L1/SLC15A1/ANXA13/SORBS2
GOBP_PEPTIDYL_LYSINE_TRIMETHYLATION	GOBP_PEPTIDYL_LYSINE_TRIMETHYLATION	33	0.648917	1.70772	0.00172362	0.0576394	0.0525925	1889	tags=45%, list=19%, signal=37%	KMT2E/ATRX/BRD4/NSD3/OGT/KMT2A/IWS1/ARID4A/SETD2/SETD5/ZNF274/CTR9/TET2/KMT2D/KMT5B
GOBP_PROTEOGLYCAN_BIOSYNTHETIC_PROCESS	GOBP_PROTEOGLYCAN_BIOSYNTHETIC_PROCESS	29	-0.666091	-1.9318	0.00172573	0.0576394	0.0525925	240	tags=17%, list=2%, signal=17%	CHPF/CTNNB1/IGF1/BGN/DCN
GOBP_VASCULATURE_DEVELOPMENT	GOBP_VASCULATURE_DEVELOPMENT	327	-0.328422	-1.38392	0.00177308	0.0587189	0.0535774	546	tags=15%, list=6%, signal=15%	SOCS3/TNFSF12/AMOT/CTSH/FGF1/ADAM10/BMP7/TGFBR2/EPHA2/ETS1/ENG/B4GALT1/BAX/SHC1/TMEM204/PTGIS/EPHB3/ITGA5/NAXE/ATP2B4/KLF2/EGFL7/ID1/CTNNB1/ADAM15/CLIC4/NIBAN2/FKBP10/BTG1/ADAMTS1/VEGFB/AQP1/FLNA/NR4A1/TGFBI/APOD/COL4A2/FN1/COL4A1/MMP2/SERPINF1/ANXA1/THBS1/COL1A1/SERPINE1/COL1A2/SFRP2/SPARC/DCN
GOBP_CHONDROITIN_SULFATE_BIOSYNTHETIC_PROCESS	GOBP_CHONDROITIN_SULFATE_BIOSYNTHETIC_PROCESS	12	-0.836957	-2.00625	0.00178268	0.0587189	0.0535774	240	tags=25%, list=2%, signal=24%	CHPF/BGN/DCN
GOBP_RESPONSE_TO_METAL_ION	GOBP_RESPONSE_TO_METAL_ION	179	-0.41303	-1.64708	0.00179442	0.0587189	0.0535774	458	tags=14%, list=5%, signal=14%	VCAM1/FSTL3/NCSTN/DUSP1/SUMO1/CLIC4/CACYBP/PTGES/AQP1/MT-CYB/ASS1/B2M/PRNP/CCND1/SYT8/SERPINF1/S100A13/THBS1/MT1M/MT1G/KRT14/SPARC/MT1X/MT1E/MT2A
GOBP_EPIDERMAL_GROWTH_FACTOR_RECEPTOR_SIGNALING_PATHWAY	GOBP_EPIDERMAL_GROWTH_FACTOR_RECEPTOR_SIGNALING_PATHWAY	89	0.536005	1.6552	0.00181264	0.0589169	0.0537582	1830	tags=36%, list=19%, signal=29%	PIGR/AGR2/EREG/CCDC88A/SOX9/HBEGF/HIP1R/ERRFI1/ERBIN/GRB2/PTPN12/PIK3C2A/MVP/IFI6/AREG/VIL1/SNX6/BRAF/REPS2/HGS/GRB7/PTK2/KIF16B/PDPK1/PTK6/RAB7A/DUSP3/PSEN1/SOCS4/PTPN3/EPN1/FER
GOCC_SIDE_OF_MEMBRANE	GOCC_SIDE_OF_MEMBRANE	223	-0.384191	-1.57038	0.00187714	0.0606065	0.0552998	773	tags=19%, list=8%, signal=18%	HLA-G/PPP3CA/BCAP31/GM2A/ITGAE/CD302/FARP1/MAP2K2/GNG10/PTPN22/FCGRT/ESYT2/AMOT/EEF1A1/CISD1/FYN/TGFBR2/VCAM1/RGS2/ENG/FKBP1A/B4GALT1/DNAJA1/HLA-F/ITGA5/CAPN2/RPS28/IGLC2/CXCL12/ATP2A2/IGHA1/B2M/PRNP/IGHG2/GNG11/CLEC2B/ANXA1/THBS1/IGHG1/IGHG4/IGLC1/IGKC
GOBP_CELL_MATURATION	GOBP_CELL_MATURATION	68	0.56111	1.67094	0.00190906	0.0612291	0.0558678	730	tags=16%, list=8%, signal=15%	SPINK1/ABHD2/CFTR/VEGFA/EREG/DEFB1/ZBTB7A/APP/HIF1A/ANG/TUT4
GOCC_CLATHRIN_COATED_PIT	GOCC_CLATHRIN_COATED_PIT	47	0.614396	1.71698	0.00192246	0.0612531	0.0558898	2049	tags=51%, list=21%, signal=40%	CLTA/MYO6/LDLR/LRP10/HIP1R/APP/CDHR5/NUMB/CLTC/ITSN2/AMN/AP1S3/DNM2/AP2B1/LRP1/CEMIP/AP2A2/TFRC/PICALM/EPN1/FCHO2/CTTN/DNM1L/TBC1D5
GOCC_RESPIRASOME	GOCC_RESPIRASOME	72	-0.526172	-1.8355	0.00197167	0.0624104	0.0569457	1752	tags=62%, list=18%, signal=52%	COX4I1/CYCS/NDUFA8/SDHB/DMAC1/UQCR11/TTC19/NDUFA2/NDUFA9/SDHD/COX8A/SURF1/NNT/COX7A2/NDUFS3/NDUFS4/MT-CO2/NDUFB6/COX5A/SDHA/NDUFA6/NDUFA11/HIGD2A/NDUFA3/COX7B/NDUFC2/MT-ND1/NDUFB4/MT-ND2/MT-ND3/NDUFA12/COX6A1/NDUFS5/COA6/SDHC/UQCRQ/UQCRFS1/NDUFB2/UQCR10/NDUFB3/NDUFAB1/NDUFS6/MT-CO3/NDUFA1/MT-CYB
GOBP_CHONDROITIN_SULFATE_PROTEOGLYCAN_METABOLIC_PROCESS	GOBP_CHONDROITIN_SULFATE_PROTEOGLYCAN_METABOLIC_PROCESS	21	-0.732815	-1.96706	0.00199374	0.0626992	0.0572093	240	tags=19%, list=2%, signal=19%	HEXB/CHPF/BGN/DCN
GOCC_CLUSTER_OF_ACTIN_BASED_CELL_PROJECTIONS	GOCC_CLUSTER_OF_ACTIN_BASED_CELL_PROJECTIONS	78	0.543802	1.6477	0.0020125	0.0628809	0.057375	1951	tags=44%, list=20%, signal=35%	SLC3A1/CDHR2/LIMA1/MYL6/EPS8L2/ADD3/SLC9A3R1/PLS1/EZR/CDHR5/PLEC/USH1C/MYH14/ATP8B1/VEZT/EPS8/SLC7A11/AMN/CLIC1/MYO7B/HSP90AB1/KCNK1/VIL1/NPC1L1/SLC15A1/MYH9/GNA13/SLC4A7/SLC28A3/DCDC2/SLC11A2/ESPN/DNM1L/ACTR3
GOBP_ESTABLISHMENT_OF_PROTEIN_LOCALIZATION_TO_MEMBRANE	GOBP_ESTABLISHMENT_OF_PROTEIN_LOCALIZATION_TO_MEMBRANE	235	-0.364532	-1.50821	0.002101	0.0649259	0.059241	705	tags=23%, list=7%, signal=22%	TOMM22/BID/TIMM8B/RAB34/RPL32/EMC7/TIMM10/EMC4/FYN/RPS24/VAMP2/RPS23/SEC61B/RPL8/E2F1/BAX/RPL35A/RPL15/RPL23A/RPS7/SEC61G/RPS14/PDCD5/RPL18/RPS3/RPS4Y1/RPS27A/RPS18/SRP9/RPS16/RPL36A/RPL5/RPL10A/RPS27/RPL26/RPS28/RPL37A/RPL10/SSR2/RPS15A/RPL17/RPLP0/RPL11/RPS21/RPL21/RPL39/RPS3A/RPL7A/RPL3/RPS6/RPL37/PRNP/RPS19/RPLP1/RPS4X
GOCC_PROTEIN_LIPID_COMPLEX	GOCC_PROTEIN_LIPID_COMPLEX	15	0.755074	1.74017	0.00210476	0.0649259	0.059241	552	tags=47%, list=6%, signal=44%	CLU/APOL1/LDLR/SAA1/APOC1/SAA2/HDLBP
GOBP_LYMPHOCYTE_ACTIVATION	GOBP_LYMPHOCYTE_ACTIVATION	318	-0.347467	-1.47522	0.00212439	0.0651166	0.059415	1027	tags=18%, list=11%, signal=16%	CD320/IRS2/CTLA4/LAMP1/RUNX1/HES1/XRCC6/NFATC2/IRF2BP2/MAP3K8/TNIP2/ULBP2/SELENOK/TWSG1/CDC42/HLA-G/PPP3CA/PHB/PRDX1/CDKN1A/FLOT2/TNFRSF1B/PTPN22/RAC2/FYN/TGFBR2/VCAM1/FKBP1A/NCSTN/BAX/PRDX2/PRELID1/PHB2/HLA-F/SOCS1/RPS3/HSPH1/RUNX3/DDOST/CTSL/CD81/BST2/IGLC2/LCP1/RPS6/IGHA1/B2M/PRNP/IGF1/IGHG2/ANXA1/IGHG1/IGHG4/LY6D/IGLC1/IGKC
GOMF_RRNA_BINDING	GOMF_RRNA_BINDING	51	-0.550262	-1.80612	0.00217448	0.0660121	0.0602321	454	tags=29%, list=5%, signal=28%	NOP53/RPL8/GTF3A/RPL23A/RPS14/MRPL20/RPS3/RPS4Y1/RPS18/RPL5/RPLP0/RPL11/RPL3/RPL37/RPS4X
GOCC_ATPASE_COMPLEX	GOCC_ATPASE_COMPLEX	76	0.544584	1.64764	0.00218087	0.0660121	0.0602321	959	tags=26%, list=10%, signal=24%	FXYD2/ATP1B1/SMARCC2/RSF1/BPTF/ZBTB7A/ATP10B/ARID1B/ATP1A1/ATP8B1/CSNK2A1/SMARCA4/SMARCC1/ZNHIT1/RFC1/SMARCA1/SS18/SMARCA5/YY1/EP400
GOBP_VESICLE_LOCALIZATION	GOBP_VESICLE_LOCALIZATION	147	0.478473	1.56802	0.00220554	0.0663177	0.0605109	1791	tags=29%, list=18%, signal=24%	SERPINA1/MYO6/TRAK1/SEC31A/CSNK1D/TESK1/FBXW11/CD59/FNBP1L/KIF5B/TRIP11/GOLGA2/DYNC1H1/CCDC186/FAM91A1/RAB27B/AP3D1/MX1/BICDL2/TFG/F5/AREG/MLPH/MYO7B/DNM2/TCIRG1/TANC2/NSF/ARFGAP3/KIF3B/PCLO/PAFAH1B1/SCFD1/AP1AR/PICALM/RAB1A/MAP2/KIF3A/AP3B1/PSEN1/USO1/CTSC/DCTN2
GOMF_RECEPTOR_INHIBITOR_ACTIVITY	GOMF_RECEPTOR_INHIBITOR_ACTIVITY	10	-0.854754	-1.97957	0.00222038	0.0663177	0.0605109	757	tags=50%, list=8%, signal=46%	SLURP2/LRPAP1/LY6H/LY6E/MTRNR2L12
GOBP_REGULATION_OF_CELL_ACTIVATION	GOBP_REGULATION_OF_CELL_ACTIVATION	241	-0.370899	-1.53664	0.00223549	0.0663177	0.0605109	1027	tags=18%, list=11%, signal=16%	CD320/IRS2/CTLA4/LAMP1/RUNX1/HES1/XRCC6/NFATC2/MAP3K8/TNIP2/SELENOK/TWSG1/CDC42/HLA-G/CDKN1A/FLOT2/TNFRSF1B/PTPN22/RAC2/FYN/TGFBR2/VCAM1/PRDX2/NECTIN2/PRELID1/HLA-F/SOCS1/RPS3/HSPH1/RUNX3/CD81/IGLC2/IGHA1/PRNP/IGF1/IGHG2/ANXA1/THBS1/CD9/IGHG1/IGHG4/IGLC1/IGKC
GOCC_LEADING_EDGE_MEMBRANE	GOCC_LEADING_EDGE_MEMBRANE	87	0.523775	1.61733	0.00224574	0.0663177	0.0605109	1437	tags=31%, list=15%, signal=27%	SPTBN1/TLN1/SYNE2/MYO6/PTPRK/EPS8L2/CLCN3/HIP1R/EZR/EPS8L3/MACF1/TESC/VEZT/GABRA2/PAK1/DIAPH1/CFL1/EPS8/DNM2/GABRE/PSD4/APC/PACSIN2/ITGB1/PLEKHA1/DDX58/SH3YL1
GOBP_NEGATIVE_REGULATION_OF_CELL_ADHESION	GOBP_NEGATIVE_REGULATION_OF_CELL_ADHESION	132	-0.433787	-1.64085	0.00228074	0.0669433	0.0610818	668	tags=20%, list=7%, signal=19%	MUC21/ZNF703/PTPN22/MYADM/ADAM10/ACTN4/DUSP1/PRDX2/SNAI2/SOCS1/ADAM15/RUNX3/ASS1/CXCL12/PRNP/TGFBI/APOD/ARHGDIB/CDKN2A/FXYD5/ANXA1/THBS1/COL1A1/CD9/SERPINE1/FBLN1
GOBP_MAINTENANCE_OF_GASTROINTESTINAL_EPITHELIUM	GOBP_MAINTENANCE_OF_GASTROINTESTINAL_EPITHELIUM	12	0.80665	1.78796	0.00231656	0.0675849	0.0616672	207	tags=42%, list=2%, signal=41%	SERPINA3/TFF2/TFF3/TFF1/SOX9
GOBP_ESTABLISHMENT_OF_CELL_POLARITY	GOBP_ESTABLISHMENT_OF_CELL_POLARITY	86	0.526651	1.62109	0.00234373	0.0679681	0.0620168	2026	tags=43%, list=21%, signal=34%	LLGL2/PATJ/SLC9A3R1/ARFGEF1/FBXW11/NUMA1/PAK1/MISP/PRKCI/ROCK1/GSK3B/GSN/SHTN1/MAP4/MYO9A/MYO18A/HSP90AB1/WEE1/TCIRG1/RNF41/MYH9/CYTH1/FRMD4B/ITGB1/MARK2/PTK2/PAFAH1B1/RUFY3/RAB10/KRIT1/HSP90AA1/DCTN1/PARD3/CDK5RAP2/RAB11FIP2/PKHD1/STK11
GOBP_FC_EPSILON_RECEPTOR_SIGNALING_PATHWAY	GOBP_FC_EPSILON_RECEPTOR_SIGNALING_PATHWAY	89	-0.476929	-1.71303	0.00235944	0.0680164	0.0620609	809	tags=21%, list=8%, signal=20%	PSMD2/NFATC2/PSMD9/PSMC2/PPP3CA/PSMA7/PSMB2/PSMB3/SKP1/PSMB7/PSMD8/SHC1/PSMB5/PSMA2/PSMD4/PSMB4/IGLC2/IGLC1/IGKC
GOMF_MICROTUBULE_BINDING	GOMF_MICROTUBULE_BINDING	128	0.487251	1.56681	0.00245282	0.0702901	0.0641355	1920	tags=36%, list=20%, signal=29%	TRIM54/NDRG1/DST/HOOK2/CCDC88A/EZR/MTUS1/MAP4K4/FBXW11/NUMA1/CLIP1/KIF21A/KIF5B/MACF1/EML4/CEP57/GOLGA2/MX1/KIFC2/MAP4/SBDS/DNM2/CLIP2/APC/KIF3B/CAPN6/ZNF207/FMN1/MAP9/HOOK1/FHDC1/PAFAH1B1/CKAP5/KIF16B/KRIT1/DCTN1/KIF12/HOOK3/LRPPRC/MAP2/KIF3A/TOGARAM1/VPS41/CDK5RAP2/CEP44/DNM1L
GOBP_PHAGOCYTOSIS	GOBP_PHAGOCYTOSIS	138	-0.415432	-1.59724	0.00247663	0.0705549	0.0643771	136	tags=13%, list=1%, signal=13%	CD302/BRK1/RAB34/TXNDC5/ARPC5/RAC2/FYN/C1orf43/ACTB/IGLC2/IGHA1/IGHG2/ANXA1/THBS1/IGHG1/IGHG4/IGLC1/IGKC
GOCC_APICAL_JUNCTION_COMPLEX	GOCC_APICAL_JUNCTION_COMPLEX	93	0.525292	1.63337	0.00250116	0.070656	0.0644694	1979	tags=49%, list=20%, signal=40%	CLDN18/SHROOM3/CLDN10/CTNND1/TJP2/PATJ/CDH1/CGN/OCLN/USP53/PKN2/MTDH/CTNNA1/AOC1/JUP/PRKCI/ACTG1/MICALL2/MAGI1/MAGI3/ANK3/PDCD6IP/PARD6B/CLDN23/CLDN12/ASH1L/CLDN2/PLEKHA7/APC/SHROOM1/MPP5/NHS/MARVELD3/CYTH1/FRMD4B/DDX58/NECTIN3/FZD5/EPPK1/TJP3/TGFBR1/SYMPK/POF1B/PARD3/TJAP1/CLDN1
GOCC_INTERMEDIATE_FILAMENT_CYTOSKELETON	GOCC_INTERMEDIATE_FILAMENT_CYTOSKELETON	62	-0.520622	-1.79617	0.00250936	0.070656	0.0644694	262	tags=19%, list=3%, signal=19%	KRT15/PKP1/KRT4/NME2/KRT17/KRT5/KRT14/KRT81/KRT6A/VIM/KRT16/KRT13
GOBP_EXPORT_ACROSS_PLASMA_MEMBRANE	GOBP_EXPORT_ACROSS_PLASMA_MEMBRANE	23	0.706771	1.75602	0.00258685	0.0724169	0.0660761	554	tags=30%, list=6%, signal=29%	SLC40A1/FXYD2/ATP1B1/SLC4A4/KCNE3/SLC22A18/ATP1A1
GOMF_MOTOR_ACTIVITY	GOMF_MOTOR_ACTIVITY	57	0.57658	1.66625	0.00261455	0.0727716	0.0663998	2405	tags=49%, list=25%, signal=37%	MYO6/MYL6/CGN/DYNC1I2/KIF21A/KIF5B/MYH14/DYNC2H1/DYNC1LI2/DYNC1H1/KIFC2/MYO9A/MYO7B/DYNLL2/KIF3B/MYH9/KIF16B/DCTN1/KIF12/DNAH14/KIF3A/DNAH5/DCTN2/MYO10/KIF13B/DYNC1LI1/MYO1A/APPBP2
GOBP_MYELOID_LEUKOCYTE_ACTIVATION	GOBP_MYELOID_LEUKOCYTE_ACTIVATION	370	0.395292	1.39715	0.00263125	0.0728179	0.0664419	1832	tags=29%, list=19%, signal=24%	SERPINA3/SERPINA1/OLFM4/PIGR/LYZ/ADAM9/CYSTM1/NDRG1/CLU/CXCL8/LCN2/PA2G4/ITGB8/CXCL1/PRSS2/CEACAM6/TCN1/S100P/ITGB6/KMT2E/LDLR/LTBR/PLD1/PLSCR1/RNASET2/LGALS3/ATP6V0A1/CXCL6/VNN1/APP/CD59/PDAP1/ALDH3B1/GRN/SPTAN1/PLAC8/FOXP1/AOC1/HLA-B/IL18/JUP/DYNC1H1/SERPINB3/LRG1/DIAPH1/ROCK1/FUCA2/GSN/PLA2G10/FRK/RAB5B/ZC3H12A/IGF2R/CTSD/MVP/OLR1/IQGAP2/RAB6A/CEP290/COPB1/MYO18A/HSP90AB1/NBEAL2/UBD/TCIRG1/UNC…
GOBP_REGULATION_OF_ANATOMICAL_STRUCTURE_SIZE	GOBP_REGULATION_OF_ANATOMICAL_STRUCTURE_SIZE	264	0.419912	1.44897	0.00270345	0.0743911	0.0678774	2087	tags=35%, list=21%, signal=28%	SPTBN1/GOLGA4/SCTR/CDHR2/VEGFA/LIMA1/CRP/GBA2/SPP1/SOD2/CLCN3/ADD3/SLC9A3R1/PLS1/HIP1R/EZR/CDHR5/ARFGEF1/ARHGAP18/PPP1R15A/USH1C/BAIAP2L1/MACF1/RB1CC1/SNX9/SPTAN1/GRB2/CORO1B/PAK1/VILL/CASR/PPP1R9A/HNF1B/TRIM27/ROCK1/CDC42EP4/EIF4G2/GSK3B/GSN/SHTN1/ARPC1A/NEB/PIK3C2A/IQGAP2/EPS8/SLC12A7/ACE/PLEKHH2/EXT1/HSP90AB1/DNM2/VIL1/RAB3B/SCIN/LRP1/IST1/SLC12A2/SEMA6A/RTN4/ADD1/FMN1/RAB5A/TMEM123/ICAM1/AP1A…
GOBP_CHROMATIN_REMODELING	GOBP_CHROMATIN_REMODELING	117	0.489163	1.57026	0.00276548	0.075668	0.0690425	1932	tags=34%, list=20%, signal=28%	RESF1/SMARCC2/BAZ2B/SOX9/RSF1/BPTF/ATRX/ZBTB7A/CHD7/ARID1B/TOP1/GATAD1/CHD8/BAZ2A/ZNFX1/SMARCA4/PAK1/SMARCC1/ZNHIT1/MPHOSPH8/SMARCA1/SMARCA5/SPTY2D1/HNRNPC/PSME4/MIS18BP1/HDAC2/KAT2A/KDM6B/BAZ1B/KDM5A/NRDE2/TPR/RERE/SMARCD2/MYSM1/CENPC/TASOR/CHD4/RNF8
GOMF_WNT_PROTEIN_BINDING	GOMF_WNT_PROTEIN_BINDING	14	-0.789997	-2.00538	0.00280134	0.0762184	0.0695447	99	tags=29%, list=1%, signal=28%	FZD7/SFRP4/CTHRC1/SFRP2
GOBP_FIBRINOLYSIS	GOBP_FIBRINOLYSIS	10	-0.843438	-1.95336	0.00287933	0.0775428	0.0707532	735	tags=50%, list=8%, signal=46%	PLAUR/SERPING1/SERPINB2/THBS1/SERPINE1
GOBP_SKELETAL_SYSTEM_DEVELOPMENT	GOBP_SKELETAL_SYSTEM_DEVELOPMENT	216	-0.37511	-1.52216	0.00288204	0.0775428	0.0707532	760	tags=17%, list=8%, signal=16%	HEXB/WNT5B/HOXA10/MAF/PRDX1/EBP/HOXB7/ARID5B/PDGFC/BMP7/TGFBR2/EPHA2/ENG/UFD1/HOXB2/VKORC1/SNAI2/CTNNB1/RUNX3/CDH11/PLS3/SERPINH1/TGFBI/EPYC/SFRP4/IGF1/EFEMP1/TIMP1/MMP2/COL1A1/COL1A2/BGN/SFRP2/COL3A1/LUM/MGP
GOBP_AXO_DENDRITIC_TRANSPORT	GOBP_AXO_DENDRITIC_TRANSPORT	42	0.60748	1.66427	0.00293814	0.0784753	0.071604	1914	tags=50%, list=20%, signal=40%	DST/TRAK1/APP/FBXW11/KIF5B/HIF1A/DYNC1H1/RAB27B/AP3D1/HNRNPU/MAPK8IP3/HSPB1/SFPQ/KIF3B/PAFAH1B1/MAP2/PURA/KIF3A/AP3B1/ARMCX3/SOD1
GOMF_HISTONE_BINDING	GOMF_HISTONE_BINDING	150	0.462838	1.51102	0.00296371	0.0784753	0.071604	2065	tags=37%, list=21%, signal=29%	RESF1/SMARCC2/KMT2E/RSF1/BPTF/ATRX/BRD4/KAT6B/ZMYND8/TAF7/CHD2/KMT2C/KMT2A/PHIP/CHD8/BAZ2A/SMARCA4/SMARCC1/TBL1XR1/TSPYL1/MLLT6/MPHOSPH8/CHD1/IPO7/SMARCA5/SPTY2D1/PHF14/PSME4/ATAD2B/USP16/CBX4/KAT6A/SBNO2/BRD3/SUPT6H/BAZ1B/KDM5A/TSPYL4/USP3/NAP1L4/KMT2D/CARM1/MYSM1/ANP32B/MLLT10/PHC3/DNAJC2/RNF20/DTX3L/RNF8/PKN1/ANP32A/BRD2/RRP8/USP15
GOBP_REGULATION_OF_CELLULAR_COMPONENT_SIZE	GOBP_REGULATION_OF_CELLULAR_COMPONENT_SIZE	217	0.437504	1.48949	0.00296531	0.0784753	0.071604	2087	tags=38%, list=21%, signal=30%	SPTBN1/GOLGA4/SCTR/CDHR2/VEGFA/LIMA1/GBA2/SPP1/CLCN3/ADD3/SLC9A3R1/PLS1/HIP1R/EZR/CDHR5/ARFGEF1/ARHGAP18/PPP1R15A/USH1C/BAIAP2L1/MACF1/RB1CC1/SNX9/SPTAN1/GRB2/CORO1B/PAK1/VILL/PPP1R9A/TRIM27/CDC42EP4/EIF4G2/GSK3B/GSN/SHTN1/ARPC1A/NEB/IQGAP2/EPS8/SLC12A7/PLEKHH2/HSP90AB1/DNM2/VIL1/RAB3B/SCIN/LRP1/IST1/SLC12A2/SEMA6A/RTN4/ADD1/FMN1/RAB5A/TMEM123/ICAM1/AP1AR/PICALM/RUFY3/BAIAP2L2/ABI2/SWAP70/PPP1CA/…
GOCC_BRUSH_BORDER	GOCC_BRUSH_BORDER	60	0.558807	1.63355	0.00299445	0.0788158	0.0719147	1402	tags=40%, list=14%, signal=34%	SLC3A1/CDHR2/LIMA1/MYL6/ADD3/SLC9A3R1/PLS1/EZR/CDHR5/PLEC/USH1C/MYH14/ATP8B1/SLC7A11/AMN/CLIC1/MYO7B/HSP90AB1/KCNK1/VIL1/NPC1L1/SLC15A1/MYH9/GNA13
GOCC_MICROTUBULE_ORGANIZING_CENTER	GOCC_MICROTUBULE_ORGANIZING_CENTER	474	0.384107	1.38165	0.0030221	0.0791137	0.0721866	2023	tags=28%, list=21%, signal=23%	NDRG1/RESF1/AKAP9/AHI1/TAF1D/HOOK2/CCDC88A/ITGB6/KMT2E/RNF19A/WAPL/PATJ/TACC1/CD2AP/EZR/CSNK1D/BOD1L1/TESK1/MTUS1/FBXW11/BICD1/RBM39/DYNC1I2/PKN2/SPECC1/NUMA1/CLIP1/KIF5B/FNIP2/EML4/CCDC68/CSPP1/ITSN2/CEP57/BIRC6/DYNC1LI2/EHBP1/DYNC1H1/MISP/HK2/EXOC7/DIAPH1/KRT18/ROCK1/SPPL2B/GSK3B/PRKAR1A/PRKACB/SLC16A1/KIFC2/MARCKS/IFT172/PDCD6IP/HNRNPU/CEP290/CUL7/TTC39A/RASSF7/DNM2/SLMAP/PCM1/TACC2/PCNT/PLAG1…
GOBP_RESPONSE_TO_CORTICOSTEROID	GOBP_RESPONSE_TO_CORTICOSTEROID	70	-0.502204	-1.7536	0.00307724	0.0801239	0.0731083	679	tags=26%, list=7%, signal=24%	CDKN1A/GJB2/SGK1/SLIT3/UBE2L3/MT-ND3/ENG/FBXO32/DUSP1/PTPRU/AQP1/ASS1/CCND1/SERPINF1/ANXA1/COL1A1/SPARC/IGFBP7
GOBP_NEGATIVE_REGULATION_OF_PROTEIN_CONTAINING_COMPLEX_DISASSEMBLY	GOBP_NEGATIVE_REGULATION_OF_PROTEIN_CONTAINING_COMPLEX_DISASSEMBLY	51	0.593664	1.69071	0.00315861	0.0816532	0.0745036	1585	tags=37%, list=16%, signal=31%	SPTBN1/TRIM54/LIMA1/ADD3/BMERB1/TAOK1/SPTAN1/VILL/GSN/EPS8/PLEKHH2/VIL1/SCIN/APC/ADD1/IRAK3/SCAF8/SWAP70/CARMIL1
GOMF_CARBOXYLIC_ESTER_HYDROLASE_ACTIVITY	GOMF_CARBOXYLIC_ESTER_HYDROLASE_ACTIVITY	63	0.5576	1.64137	0.00316969	0.0816532	0.0745036	1069	tags=19%, list=11%, signal=17%	ABHD2/CES2/CA2/MGLL/LIPH/ACHE/ABHD3/PON2/AADAC/PLA2G10/NCEH1/PNPLA2
GOBP_RESPONSE_TO_BACTERIUM	GOBP_RESPONSE_TO_BACTERIUM	263	-0.354141	-1.4688	0.00328328	0.0837625	0.0764283	227	tags=10%, list=2%, signal=10%	FKBP5/PRDX3/CAPN2/PTGES/HMGB2/AQP1/ASS1/RPL39/IGLC2/ATP2A2/IGHA1/B2M/RPS19/IGHG2/REG4/CCDC80/SERPINE1/RARRES2/KRT6A/SPARC/VIM/IGHG1/IGHG4/DCN/IGLC1/IGKC
GOCC_CLATHRIN_COATED_VESICLE_MEMBRANE	GOCC_CLATHRIN_COATED_VESICLE_MEMBRANE	57	0.572414	1.65421	0.00328616	0.0837625	0.0764283	1739	tags=49%, list=18%, signal=41%	CFTR/CLTA/MYO6/EREG/CLINT1/TGOLN2/HBEGF/LDLR/HIP1R/CLTC/AP1G2/HLA-DRB1/SYNRG/IGF2R/REEP6/AREG/HLA-DRB5/AP2B1/CEMIP/AFTPH/AP2A2/RAB5A/TFRC/PICALM/FZD5/EPN2/AP3B1/EPN1
GOBP_CELLULAR_RESPONSE_TO_ACID_CHEMICAL	GOBP_CELLULAR_RESPONSE_TO_ACID_CHEMICAL	41	-0.600332	-1.92551	0.0033616	0.0852369	0.0777736	723	tags=32%, list=7%, signal=29%	IPO5/BCL11A/PDGFC/FYN/SOCS1/KLF2/COL6A1/CAPN2/ASS1/COL4A1/MMP2/COL1A1/COL1A2
GOBP_RESPONSE_TO_HEAT	GOBP_RESPONSE_TO_HEAT	106	-0.448994	-1.65517	0.00343802	0.0867204	0.0791272	679	tags=25%, list=7%, signal=24%	HIKESHI/HSBP1/RBBP7/VCP/PDCL3/CDKN1A/PRKACA/MAPKAPK2/PDCD6/DNAJB6/IRAK1/TGFB1I1/STUB1/FGF1/DNAJA1/RPA3/BAG1/SUMO1/HSPH1/MT-CYB/CXCL12/ATP2A2/ANO1/IGF1/HSPA1A/THBS1/IGFBP7
GOCC_CENTRIOLAR_SATELLITE	GOCC_CENTRIOLAR_SATELLITE	65	0.564922	1.66781	0.00350785	0.0873525	0.0797039	2214	tags=40%, list=23%, signal=31%	TAF1D/PATJ/CD2AP/RBM39/KIF5B/FNIP2/EXOC7/KRT18/CEP290/RASSF7/PCM1/PCNT/IL17RB/LRIF1/CCDC57/HOOK3/ALDOB/PIBF1/C2CD5/TMEM63A/OFD1/DCDC2/IL4R/KCTD1/CCDC14/DDHD2
GOBP_EXTRINSIC_APOPTOTIC_SIGNALING_PATHWAY_VIA_DEATH_DOMAIN_RECEPTORS	GOBP_EXTRINSIC_APOPTOTIC_SIGNALING_PATHWAY_VIA_DEATH_DOMAIN_RECEPTORS	52	-0.54696	-1.81904	0.0035157	0.0873525	0.0797039	1307	tags=38%, list=13%, signal=33%	FAIM/FAS/DAXX/DDX3X/BAD/FAF1/GABARAP/SKIL/PMAIP1/SORT1/BLOC1S2/BID/PEA15/BAX/DEDD2/HMGB2/TIMP3/THBS1/SERPINE1/SFRP2
GOCC_BASEMENT_MEMBRANE	GOCC_BASEMENT_MEMBRANE	40	-0.607462	-1.941	0.00353313	0.0873525	0.0797039	186	tags=30%, list=2%, signal=30%	LAMC1/LAMA5/ADAMTS1/TGFBI/COL4A2/FN1/COL17A1/TIMP1/COL4A1/SERPINF1/CCDC80/SPARC
GOMF_CHEMOKINE_ACTIVITY	GOMF_CHEMOKINE_ACTIVITY	17	0.728389	1.71384	0.00356108	0.0873525	0.0797039	302	tags=41%, list=3%, signal=40%	CCL20/CXCL5/CXCL8/CXCL1/CXCL2/CXCL3/CXCL6
GOBP_PRI_MIRNA_TRANSCRIPTION_BY_RNA_POLYMERASE_II	GOBP_PRI_MIRNA_TRANSCRIPTION_BY_RNA_POLYMERASE_II	33	0.629553	1.65676	0.00356396	0.0873525	0.0797039	1320	tags=39%, list=14%, signal=34%	STAT3/SOX9/FOXO3/JUN/KLF5/GNL3/HIF1A/SMARCA4/YY1/NFIB/SMAD3/DDX5/KLF4
GOCC_KERATIN_FILAMENT	GOCC_KERATIN_FILAMENT	13	-0.808793	-2.01024	0.0035713	0.0873525	0.0797039	150	tags=46%, list=2%, signal=46%	KRT4/KRT5/KRT14/KRT81/KRT6A/KRT13
GOBP_POSITIVE_REGULATION_OF_PROTEIN_TYROSINE_KINASE_ACTIVITY	GOBP_POSITIVE_REGULATION_OF_PROTEIN_TYROSINE_KINASE_ACTIVITY	26	0.671828	1.70149	0.003734	0.0908733	0.0829164	988	tags=35%, list=10%, signal=31%	CD24/ERBB3/EREG/HBEGF/GPRC5B/EFNA1/ACE/AREG/ABI1
GOBP_SPINDLE_LOCALIZATION	GOBP_SPINDLE_LOCALIZATION	29	0.649085	1.67898	0.00388393	0.0940495	0.0858145	2087	tags=62%, list=21%, signal=49%	LLGL2/FBXW11/NUMA1/DYNC1H1/MISP/CFL1/MAP4/MYH9/ITGB1/PAFAH1B1/DCTN1/SPIRE2/ACTR2/CDK5RAP2/PKHD1/ACTR3/SPIRE1/WASL
GOBP_PROTEOGLYCAN_METABOLIC_PROCESS	GOBP_PROTEOGLYCAN_METABOLIC_PROCESS	38	-0.60209	-1.87465	0.00404029	0.0973489	0.088825	240	tags=13%, list=2%, signal=13%	CHPF/CTNNB1/IGF1/BGN/DCN
GOBP_REGULATION_OF_PROTEIN_TYROSINE_KINASE_ACTIVITY	GOBP_REGULATION_OF_PROTEIN_TYROSINE_KINASE_ACTIVITY	52	0.571588	1.62661	0.00408547	0.0979502	0.0893737	1720	tags=35%, list=18%, signal=29%	CD24/ERBB3/EREG/HBEGF/IBTK/APP/GPRC5B/EFNA1/ERRFI1/MVP/ACE/AREG/ABI1/SNX6/GGNBP2/PTK6/PSEN1/SOCS4
GOBP_NEGATIVE_REGULATION_OF_CELLULAR_RESPONSE_TO_GROWTH_FACTOR_STIMULUS	GOBP_NEGATIVE_REGULATION_OF_CELLULAR_RESPONSE_TO_GROWTH_FACTOR_STIMULUS	42	-0.569032	-1.81298	0.00413139	0.098523	0.0898963	974	tags=31%, list=10%, signal=28%	SKIL/SPRY1/TWSG1/PDCD6/FSTL3/SPART/ATP2B4/NIBAN2/BAMBI/NBL1/THBS1/SFRP2/DCN
GOCC_COSTAMERE	GOCC_COSTAMERE	11	0.801217	1.74625	0.00416579	0.098523	0.0898963	875	tags=55%, list=9%, signal=50%	AHNAK2/KRT8/AHNAK/SDC4/PLEC/ANK3
GOBP_NEGATIVE_REGULATION_OF_CALCIUM_ION_TRANSPORT	GOBP_NEGATIVE_REGULATION_OF_CALCIUM_ION_TRANSPORT	20	0.699357	1.68574	0.00417039	0.098523	0.0898963	1648	tags=45%, list=17%, signal=37%	SPINK1/SESTD1/VDAC1/TRIM27/GPR35/TMBIM6/FKBP1B/ICAM1/SRI
GOCC_BLOOD_MICROPARTICLE	GOCC_BLOOD_MICROPARTICLE	51	-0.528906	-1.73603	0.0042917	0.100613	0.0918031	382	tags=25%, list=4%, signal=25%	ENG/PFN1/ACTB/IGLC2/IGHA1/IGHG2/FN1/A2M/HSPA1A/IGHG1/IGHG4/IGLC1/IGKC
GOCC_MICROTUBULE_ASSOCIATED_COMPLEX	GOCC_MICROTUBULE_ASSOCIATED_COMPLEX	72	0.53726	1.61437	0.0043004	0.100613	0.0918031	1791	tags=40%, list=18%, signal=33%	TRIM54/MAP7/KLC4/FBXW11/DYNC1I2/KIF21A/KIF5B/STAU1/DYNC2H1/DYNC1LI2/DYNC1H1/SHTN1/KIFC2/MAP4/CLIP2/DYNLL2/KIF3B/NUDCD3/PAFAH1B1/KIF16B/TPR/DCTN1/KIF12/DNAH14/MAP2/TOPORS/KIF3A/DNAH5/DCTN2
GOBP_REGULATION_OF_IMMUNE_EFFECTOR_PROCESS	GOBP_REGULATION_OF_IMMUNE_EFFECTOR_PROCESS	180	-0.389258	-1.54548	0.0043372	0.100986	0.0921436	367	tags=11%, list=4%, signal=10%	UFD1/SUSD4/NECTIN2/HLA-F/C1QBP/IFIT1/CD81/BST2/IGLC2/B2M/RPS19/C7/IGHG2/A2M/ANXA1/IGHG1/IGHG4/IGLC1/IGKC
GOBP_REGULATION_OF_VASCULATURE_DEVELOPMENT	GOBP_REGULATION_OF_VASCULATURE_DEVELOPMENT	139	-0.413134	-1.57901	0.00444076	0.102473	0.0935002	597	tags=21%, list=6%, signal=20%	PDCD6/TNFSF12/AMOT/CTSH/FGF1/ADAM10/TGFBR2/EPHA2/ETS1/ENG/PTGIS/ITGA5/NAXE/ATP2B4/KLF2/ID1/CTNNB1/NIBAN2/BTG1/ADAMTS1/VEGFB/AQP1/COL4A2/SERPINF1/THBS1/SERPINE1/SFRP2/SPARC/DCN
GOBP_G_PROTEIN_COUPLED_RECEPTOR_SIGNALING_PATHWAY	GOBP_G_PROTEIN_COUPLED_RECEPTOR_SIGNALING_PATHWAY	259	0.415678	1.43367	0.00444337	0.102473	0.0935002	1284	tags=20%, list=13%, signal=18%	CCL20/CXCL5/CXCL8/SCTR/CA2/MGLL/FGD4/CXCL1/EREG/ARHGEF12/CXCL2/DEFB1/APLP2/CXCL3/RGS5/SLC9A3R1/EZR/CXCL6/APP/ARHGEF5/SAA1/GPRC5B/BICD1/AKAP13/RAMP1/PRKCA/ADGRG6/GABRA2/CASR/PPY/ROCK1/PRKACB/IGF2R/RGS12/IQGAP2/GPR35/AREG/HPGD/NPSR1/LGR4/DNM2/GABRE/CCL28/METAP2/LRP1/PDE4C/GNG12/GPR160/SLC12A2/PDE11A/PLXNB1
GOCC_CYTOPLASMIC_REGION	GOCC_CYTOPLASMIC_REGION	128	0.473985	1.52415	0.00448575	0.102678	0.0936878	2248	tags=37%, list=23%, signal=29%	DST/CLTA/TRAK1/CTNND1/HIP1R/FBXW11/SEPTIN9/NUMA1/KIF5B/DYNC2H1/HIF1A/DYNC1H1/RAB27B/AP3D1/PRKAR1A/EPB41L2/IFT172/MAP4/HNRNPU/ENO1/MAPK8IP3/HSPB1/SFPQ/PRKAR2A/KIF3B/EPB41/PCLO/SPAG16/ARFGEF2/CFAP36/PAFAH1B1/DCTN1/DNAH14/ATG14/MAP2/PURA/KIF3A/AP3B1/DNAH5/ARMCX3/DCDC2/SOD1/ERC1/DNAJB13/CFAP221/MNS1/CFAP70
GOCC_CELL_PROJECTION_MEMBRANE	GOCC_CELL_PROJECTION_MEMBRANE	159	0.461559	1.52109	0.00449941	0.102678	0.0936878	1496	tags=28%, list=15%, signal=24%	SPTBN1/TLN1/SLC3A1/SYNE2/CDHR2/MYO6/LIMA1/S100P/EPS8L2/CLCN3/SLC9A3R1/HIP1R/EZR/EPS8L3/CDHR5/MACF1/ATP8B1/TESC/VEZT/GABRA2/UTRN/PAK1/DIAPH1/CFL1/PTPRH/EPS8/SLC7A11/AMN/HSP90AB1/KCNK1/DNM2/GABRE/PSD4/APC/IQCE/SLC12A2/NPC1L1/NAPEPLD/PACSIN2/ITGB1/GNA13/PLEKHA1/DDX58/SH3YL1/DHRS3
GOBP_REGULATION_OF_ERBB_SIGNALING_PATHWAY	GOBP_REGULATION_OF_ERBB_SIGNALING_PATHWAY	64	0.540543	1.59315	0.00451589	0.102678	0.0936878	1830	tags=34%, list=19%, signal=28%	AGR2/EREG/CCDC88A/HBEGF/HIP1R/ERRFI1/GRB2/PTPN12/MVP/IFI6/AREG/SNX6/RTN4/HGS/PTK6/RAB7A/DUSP3/PSEN1/SOCS4/PTPN3/EPN1/FER
GOCC_SPECIFIC_GRANULE_LUMEN	GOCC_SPECIFIC_GRANULE_LUMEN	36	0.613835	1.62953	0.00456085	0.102775	0.0937759	884	tags=33%, list=9%, signal=30%	OLFM4/LYZ/LCN2/CXCL1/TCN1/SPTAN1/AOC1/JUP/LRG1/FRK/CTSD/CEP290
GOBP_BLOOD_VESSEL_MORPHOGENESIS	GOBP_BLOOD_VESSEL_MORPHOGENESIS	273	-0.340204	-1.4064	0.0045877	0.102775	0.0937759	542	tags=16%, list=6%, signal=15%	TNFSF12/AMOT/CTSH/FGF1/TGFBR2/EPHA2/ETS1/ENG/B4GALT1/BAX/SHC1/PTGIS/EPHB3/ITGA5/NAXE/ATP2B4/KLF2/EGFL7/ID1/CTNNB1/ADAM15/CLIC4/NIBAN2/FKBP10/BTG1/ADAMTS1/VEGFB/AQP1/FLNA/NR4A1/TGFBI/APOD/COL4A2/FN1/COL4A1/MMP2/SERPINF1/ANXA1/THBS1/SERPINE1/SFRP2/SPARC/DCN
GOMF_PROTEIN_SERINE_THREONINE_KINASE_ACTIVITY	GOMF_PROTEIN_SERINE_THREONINE_KINASE_ACTIVITY	250	0.415683	1.42549	0.00459026	0.102775	0.0937759	2697	tags=40%, list=28%, signal=30%	RIOK3/SQSTM1/SRPK1/BRD4/CSNK1D/TESK1/CDK12/STK39/MAP4K4/TAOK3/AKAP13/PKN2/PRKCA/ERN2/TOP1/TAOK1/HIPK2/LMTK2/CSNK2A1/PAK1/RPS6KA3/GAK/MAPK3/PRKCI/ROCK1/GSK3B/PRKACB/CDK11B/SMG1/RPS6KB1/ATR/CDC42BPB/MAP3K2/BRAF/MAP3K5/TNIK/MKNK2/CSNK1G2/IKBKB/IRAK3/MARK2/SYK/STK38L/ACVR1B/CDK10/PRKAA1/PDPK1/CDK11A/EIF2AK1/ALPK1/CSNK1A1/MLKL/KALRN/CDC42BPA/MAP4K3/CDK13/SNRK/HTATIP2/CDK19/TGFBR1/TLK2/ADCK5/CLK1/CDK14…
GOBP_PROTEIN_LOCALIZATION_TO_CYTOSKELETON	GOBP_PROTEIN_LOCALIZATION_TO_CYTOSKELETON	37	0.606974	1.63306	0.00460502	0.102775	0.0937759	1796	tags=41%, list=18%, signal=33%	GOLGB1/CSNK1D/BICD1/NUMA1/DIAPH1/GSK3B/HNRNPU/PCM1/DVL1/APC/NUDCD3/HOOK3/PIBF1/DCTN2/ABHD17C
GOMF_PROTEIN_SERINE_KINASE_ACTIVITY	GOMF_PROTEIN_SERINE_KINASE_ACTIVITY	144	0.451426	1.47407	0.00487749	0.108356	0.0988687	2696	tags=43%, list=28%, signal=32%	RIOK3/SRPK1/CSNK1D/STK39/MAP4K4/TAOK3/ERN2/TAOK1/HIPK2/LMTK2/CSNK2A1/PAK1/RPS6KA3/GAK/ROCK1/GSK3B/SMG1/RPS6KB1/ATR/CDC42BPB/BRAF/TNIK/MKNK2/CSNK1G2/IKBKB/IRAK3/MARK2/STK38L/PRKAA1/PDPK1/EIF2AK1/ALPK1/CSNK1A1/KALRN/CDC42BPA/MAP4K3/SNRK/TLK2/TAOK2/MAP4K5/STK11/PRKAA2/LATS1/MARK3/TLK1/TRIO/CASK/SRPK2/ATM/STK3/DAPK3/PRKCD/EIF2AK3/MELK/LIMK2/OXSR1/SGK2/TBK1/ROCK2/PAK2/CSNK2A2/TAF1
GOCC_CELL_SURFACE	GOCC_CELL_SURFACE	297	-0.341812	-1.43184	0.00490624	0.108497	0.0989974	543	tags=15%, list=6%, signal=15%	ERP29/FCGRT/AMOT/PDGFC/ADAM10/RER1/TGFBR2/ALPP/EPHA2/VCAM1/ENG/B4GALT1/NECTIN2/PHB2/HLA-F/C1QBP/ITGA5/EGFL7/MMP7/ADAM15/CLIC4/CAPN2/TIMP2/BST2/KRT4/CD109/IGLC2/CXCL12/DCBLD2/IGHA1/B2M/PRNP/MXRA8/SLC26A9/SFRP4/IGHG2/CLEC2B/ANXA1/THBS1/BGN/SPARC/IGHG1/IGHG4/LY6D/IGLC1/IGKC
GOBP_ESTABLISHMENT_OF_PROTEIN_LOCALIZATION_TO_PLASMA_MEMBRANE	GOBP_ESTABLISHMENT_OF_PROTEIN_LOCALIZATION_TO_PLASMA_MEMBRANE	41	0.599617	1.63428	0.00503221	0.11022	0.100569	2149	tags=46%, list=22%, signal=36%	SPTBN1/GOLGA4/AFDN/OPTN/MACF1/KRT18/VPS35/ANK3/AMN/NSF/GRIPAP1/GGA3/LYPLA1/NECTIN3/RAB10/RAB7A/SEC16A/GGA1/GOPC
GOBP_CELLULAR_RESPONSE_TO_VASCULAR_ENDOTHELIAL_GROWTH_FACTOR_STIMULUS	GOBP_CELLULAR_RESPONSE_TO_VASCULAR_ENDOTHELIAL_GROWTH_FACTOR_STIMULUS	31	-0.585324	-1.72545	0.00504125	0.11022	0.100569	458	tags=26%, list=5%, signal=25%	MAPKAPK2/VCAM1/ATP2B4/VEGFB/NR4A1/ANXA1/MT1G/DCN
GOBP_PEPTIDE_BIOSYNTHETIC_PROCESS	GOBP_PEPTIDE_BIOSYNTHETIC_PROCESS	472	-0.299897	-1.30506	0.00505241	0.11022	0.100569	442	tags=17%, list=5%, signal=17%	EIF4A3/RPL35/YBX3/MRPL9/RCC1L/NOLC1/MRPS14/RPL39L/DHX9/ELAVL1/CNOT6L/RPL32/MRPS26/MGST2/MRPL57/GSPT1/EEF1A1/EIF1AX/ZNF706/RPS24/EIF5A/MRPL27/RPS23/RPL8/RSL24D1/MRPL33/RGS2/MRPL55/CHCHD1/GAPDH/MRPL24/EIF3K/MAGOH/RPL35A/RPL15/MRPS12/EIF3L/RPL22L1/EIF4A1/C1QBP/RPL23A/TRMT112/MRPL43/RPS7/RPS14/MRPL36/RPL18/MRPL20/RPS3/RPS4Y1/RPS27A/RPS18/SRP9/RPS16/MRPS24/RPL36A/RPL5/RPL10A/RPS27/RPL26/RPS28/RPL37A/R…
GOBP_RIBOSOMAL_LARGE_SUBUNIT_ASSEMBLY	GOBP_RIBOSOMAL_LARGE_SUBUNIT_ASSEMBLY	22	-0.69351	-1.86004	0.00516603	0.111929	0.102129	454	tags=41%, list=5%, signal=39%	NOP53/RSL24D1/RPL23A/MRPL20/RPL5/RPL10/RPLP0/RPL11/RPL3
GOBP_GERM_CELL_DEVELOPMENT	GOBP_GERM_CELL_DEVELOPMENT	89	0.510726	1.57713	0.00517699	0.111929	0.102129	1646	tags=28%, list=17%, signal=24%	SPINK1/ABHD2/CFTR/EREG/DEFB1/SRPK1/AFF4/DIAPH2/FBXW11/TMF1/CEP57/KDM3A/ANG/TUT4/RPS6KB1/TUT7/PSME4/CELF1/SMAD5/SPAG16/HOOK1/PAFAH1B1/NECTIN3/ZNF830/KMT2D
GOMF_PHOSPHOLIPID_BINDING	GOMF_PHOSPHOLIPID_BINDING	240	0.422846	1.44785	0.00531689	0.114443	0.104422	1853	tags=29%, list=19%, signal=24%	ANXA10/SPTBN1/ANXA4/TLN1/WDR45B/CLINT1/CCDC88A/SYT13/OSBPL1A/PLD1/SESTD1/HIP1R/PLEKHA5/VDAC1/PIK3C2G/APOC1/F3/OGT/NUMA1/PLEKHA4/SNX9/ATP8B1/ANXA11/OSBPL2/VILL/PRKCI/JAG1/GSN/SDCBP2/PLA2G10/EXOC1/ARHGAP26/PIK3C2A/IQGAP2/SYTL2/SERPINA5/VIL1/PSD4/SNX6/SCIN/NF1/ARHGAP32/PLEKHB2/SMURF1/PITPNM1/EPB41/PCLO/EEA1/ANXA13/GRB7/PACSIN2/GSDMD/SH3YL1/PICALM/SDCBP/KIF16B/KRIT1/GOT2/APPL1/BAIAP2L2/ABCG1/C2CD5/EP…
GOBP_CELLULAR_RESPIRATION	GOBP_CELLULAR_RESPIRATION	132	-0.413725	-1.56496	0.00541208	0.115977	0.105822	1580	tags=40%, list=16%, signal=34%	DGUOK/UQCR11/PINK1/NDUFA2/GHITM/NDUFA9/DLD/SDHD/GPD2/COX8A/IDH3B/SURF1/AIFM2/NNT/NDUFS3/DLST/NDUFS4/CHCHD2/MT-CO2/VCP/NDUFB6/COX5A/SDHA/NDUFA6/BID/NDUFA11/ATP5F1D/NDUFA3/COX7B/NDUFC2/MT-ND1/CISD1/NDUFB4/MT-ND2/MT-ND3/NDUFA12/NOP53/COX6A1/NDUFS5/ISCU/COA6/SDHC/UQCRQ/UQCRFS1/NDUFB2/UQCR10/PRELID1/NDUFB3/NDUFAB1/NDUFS6/MT-CO3/NDUFA1/MT-CYB
GOBP_ORGANELLE_LOCALIZATION	GOBP_ORGANELLE_LOCALIZATION	416	0.382871	1.36257	0.00549185	0.116797	0.10657	2519	tags=34%, list=26%, signal=26%	SERPINA1/CFTR/SYNE2/MYO6/AKAP9/AHI1/LLGL2/TRAK1/SEC31A/SLC9A3R1/EZR/CSNK1D/TESK1/FBXW11/BICD1/CHMP2B/CHMP4C/CD59/DYNC1I2/NUMA1/FNBP1L/KIF5B/EML4/TRIP11/CEP57/ARHGAP21/GOLGA2/HIF1A/DYNC1LI2/STX7/DYNC1H1/MISP/CCDC186/FAM91A1/PDZD8/YWHAZ/RAB27B/AP3D1/MX1/BICDL2/TFG/F5/CFL1/MAP4/RAB6A/HNRNPU/CEP290/PPP2R1A/COPG1/STX16/AREG/SYTL2/MLPH/MYO7B/DNM2/RAB3B/SDAD1/PCM1/TCIRG1/UNC13D/PCNT/TANC2/NSF/ARFGAP3/KI…
GOBP_REGULATION_OF_SECRETION	GOBP_REGULATION_OF_SECRETION	278	0.409279	1.41896	0.00550927	0.116797	0.10657	1663	tags=29%, list=17%, signal=25%	TFF2/RAB11FIP1/ADAM9/ERBB3/CFTR/MYO6/SOX4/SPP1/LLGL2/FAM3D/SDC4/SYT13/ACHE/SLC9A3R1/CD2AP/HIP1R/EZR/SAA1/STK39/CHD7/TCF7L2/PRKCA/KIF5B/SNCAIP/AIMP1/TMF1/HIF1A/C1QTNF12/ANG/CASR/SLC9B2/PPP1R9A/RAB27B/GSK3B/PLA2G10/EXOC1/HLA-DRB1/HNF4A/SLC16A1/PLA2R1/PDCD6IP/MIDN/XBP1/MYO18A/RAB3B/TCIRG1/UNC13D/DVL1/MPC2/SCIN/LRP1/NSF/REST/TNFRSF11A/PCLO/MCU/SLC12A2/RALA/FKBP1B/FOXA2/HMGN3/HGS/RAB5A/SYK/PRKAA1/RAB1…
GOBP_PROTEIN_DEPOLYMERIZATION	GOBP_PROTEIN_DEPOLYMERIZATION	66	0.556856	1.64872	0.00552271	0.116797	0.10657	1615	tags=35%, list=17%, signal=29%	SPTBN1/TRIM54/LIMA1/ADD3/BMERB1/TAOK1/SPTAN1/VILL/GAK/GSN/CFL1/EPS8/PLEKHH2/VIL1/SCIN/APC/ADD1/NCKAP5/CKAP5/SWAP70/MICAL1/CARMIL1/F2RL1
GOBP_MALE_GAMETE_GENERATION	GOBP_MALE_GAMETE_GENERATION	196	0.432552	1.45741	0.00561864	0.118309	0.10795	1566	tags=24%, list=16%, signal=21%	SPINK1/ABHD2/TSPAN8/CFTR/ADAM28/DEFB1/ACOX1/SOX9/SRPK1/ATRX/AFF4/TESK1/HERC4/TMF1/CEP57/DHX36/UBR2/ARID4A/KDM3A/TRIM27/ANKRD49/IGF2R/GOLGA3/YY1/AGFG1/GAMT/SETX/ACE/SERPINA5/LGR4/SUN1/DNM2/PSME4/PGM3/PIAS1/SPAG16/CCNI/HOOK1/RAI14/PAFAH1B1/PLEKHA1/KDM5A/NECTIN3/BCL6/GGNBP2/FOXA3/XRN2/CALR
GOBP_RIBONUCLEOSIDE_TRIPHOSPHATE_METABOLIC_PROCESS	GOBP_RIBONUCLEOSIDE_TRIPHOSPHATE_METABOLIC_PROCESS	58	-0.492463	-1.6811	0.00564816	0.118416	0.108047	1643	tags=47%, list=17%, signal=39%	MT-ATP8/NME7/ATP5MC3/DGUOK/PINK1/RHOQ/STOML2/PARP1/ATP5PO/NUDT2/MT-CO2/VCP/ATP5F1A/ATP5MC2/ATP5F1D/NME1/ITPA/IMPDH2/NME3/RAN/ATP5PF/ATP5MG/ATP5F1E/MT-ATP6/ATP5ME/NME2/TMSB4X
GOBP_WOUND_HEALING	GOBP_WOUND_HEALING	267	-0.340221	-1.40736	0.00578215	0.120702	0.110134	499	tags=13%, list=5%, signal=12%	FGF1/FYN/TGFBR2/ETS1/B4GALT1/VKORC1/PRDX2/ACTB/C1QBP/ITGA5/PPIA/FKBP10/FLNA/CD109/ST3GAL4/SERPINB2/DCBLD2/CLDN3/IGF1/FN1/TIMP1/A2M/ANXA1/THBS1/COL1A1/CD9/SERPINE1/COL1A2/FBLN1/KRT6A/SPARC/COL3A1/DCN/SPRR3
GOBP_MAINTENANCE_OF_LOCATION_IN_CELL	GOBP_MAINTENANCE_OF_LOCATION_IN_CELL	104	0.480098	1.51163	0.00587656	0.121954	0.111276	1790	tags=38%, list=18%, signal=31%	ERO1A/LCN2/AKAP9/DDIT3/CCDC88A/IBTK/VPS13A/CHD7/HSP90B1/OS9/KDELR1/ARHGAP21/HK2/DIAPH1/GSN/AP3D1/TAF3/VPS13C/ANK3/HNRNPU/ATP7B/HSPA5/NPSR1/SUN1/SCIN/VPS13D/CEMIP/TAF8/FKBP1B/GAA/SP100/PDPK1/CALR/PLCG2/TOPORS/SRI/PSEN1/SLC30A7/TMEM38A
GOBP_PROTEIN_TARGETING_TO_VACUOLE	GOBP_PROTEIN_TARGETING_TO_VACUOLE	29	0.636099	1.64539	0.00589247	0.121954	0.111276	1722	tags=45%, list=18%, signal=37%	CLU/GCC2/VPS13A/AP3D1/VPS13C/VPS13D/SMURF1/GGA3/HGS/VTI1B/RAB7A/AP3B1/VPS41
GOBP_REGULATION_OF_EXECUTION_PHASE_OF_APOPTOSIS	GOBP_REGULATION_OF_EXECUTION_PHASE_OF_APOPTOSIS	11	-0.822026	-1.94415	0.00597538	0.123082	0.112305	334	tags=18%, list=3%, signal=18%	PTGIS/MTRNR2L12
GOMF_ORGANIC_ANION_TRANSMEMBRANE_TRANSPORTER_ACTIVITY	GOMF_ORGANIC_ANION_TRANSMEMBRANE_TRANSPORTER_ACTIVITY	73	0.51818	1.55705	0.00599837	0.123082	0.112305	1443	tags=25%, list=15%, signal=21%	SLC44A4/SLC3A1/CFTR/SLC4A4/SLC9A3R1/SLC6A8/SLC6A20/SLC38A1/SLC1A1/SLC35A3/SLC6A14/SLC16A1/SLC7A11/MPC2/SLC38A5/SLC17A9/SLC16A7/SLC4A7
GOBP_RESPONSE_TO_WOUNDING	GOBP_RESPONSE_TO_WOUNDING	321	-0.32475	-1.3816	0.00602322	0.123082	0.112305	368	tags=11%, list=4%, signal=11%	B4GALT1/BAX/VKORC1/PRDX2/PHB2/ACTB/CERS2/C1QBP/ITGA5/PPIA/FKBP10/FLNA/CD109/ST3GAL4/SERPINB2/DCBLD2/CLDN3/APOD/IGF1/FN1/TIMP1/A2M/ANXA1/THBS1/COL1A1/CD9/ID3/SERPINE1/COL1A2/FBLN1/KRT6A/SPARC/COL3A1/DCN/SPRR3
GOBP_REGULATION_OF_GROWTH	GOBP_REGULATION_OF_GROWTH	334	-0.316872	-1.3336	0.0060717	0.123551	0.112733	1007	tags=16%, list=10%, signal=15%	BCL2L11/EDN1/RUNX1/GDI1/NET1/CIB1/SERTAD3/RBBP7/SIPA1/PLAA/SLC25A33/TSPYL2/WFS1/CDC42/HPN/YBX3/PHB/CCDC85B/CDKN1A/SGK1/CXCL16/SLIT3/BCL11A/PPT1/NKD1/SOCS3/ADAM10/TGFBR2/ADIPOR1/CHPT1/RGS2/SPART/SHC1/SOCS1/ADAM15/BTG1/BST2/CXCL12/DCBLD2/IGF1/CDKN2A/FN1/IGFBP3/HSPA1A/KRT17/MT1M/MT1G/SFRP2/CRABP2/MT1X/MT1E/IGFBP7/MT2A
GOCC_ENDOPLASMIC_RETICULUM_LUMEN	GOCC_ENDOPLASMIC_RETICULUM_LUMEN	144	-0.402762	-1.53693	0.00612244	0.124063	0.1132	758	tags=26%, list=8%, signal=25%	WNT5B/TOR1A/JMJD8/PLAUR/LRPAP1/LAMB2/TXNDC5/GANAB/EVA1A/ERP29/SDF2L1/LAMC1/PDGFC/ADAM10/COLGALT1/FSTL3/CRTAP/COL14A1/SELENOM/COL6A1/FKBP10/PRSS23/SERPINH1/SPON1/B2M/MXRA8/COL4A2/FN1/COL17A1/TIMP1/IGFBP3/COL4A1/THBS1/COL1A1/SPARCL1/COL1A2/COL3A1/IGFBP7
GOBP_HUMORAL_IMMUNE_RESPONSE	GOBP_HUMORAL_IMMUNE_RESPONSE	90	-0.464566	-1.65956	0.0062519	0.125986	0.114955	354	tags=21%, list=4%, signal=21%	GAPDH/SUSD4/C1QBP/HMGN2/CD81/CXCL14/RPL39/IGLC2/IGHA1/RPS19/C7/IGHG2/A2M/RARRES2/KRT6A/IGHG1/IGHG4/IGLC1/IGKC
GOBP_HYDROGEN_PEROXIDE_BIOSYNTHETIC_PROCESS	GOBP_HYDROGEN_PEROXIDE_BIOSYNTHETIC_PROCESS	10	0.794983	1.69364	0.00627581	0.125986	0.114955	180	tags=40%, list=2%, signal=39%	DUOX2/DUOXA2/ACOX1/SOD2
GOMF_KINASE_ACTIVITY	GOMF_KINASE_ACTIVITY	405	0.380263	1.35177	0.0062954	0.125986	0.114955	2697	tags=36%, list=28%, signal=27%	ERBB3/PDK4/PFKFB3/RIOK3/ETNK1/HKDC1/AK4/TJP2/SQSTM1/SRPK1/BRD4/SEPHS2/CSNK1D/CMPK1/TESK1/CDK12/STK39/MAP4K4/PIK3C2G/JAK1/TAOK3/AKAP13/PKN2/PRKCA/ERN2/TOP1/SGMS2/TAOK1/HIPK2/LMTK2/CSNK2A1/PAK1/RPS6KA3/GAK/MAPK3/PRKCI/HK2/FGFR4/ROCK1/GSK3B/FRK/PRKACB/IGF2R/PIK3C2A/CDK11B/GNE/MAGI3/SMG1/RPS6KB1/RFK/ATR/WEE1/CDC42BPB/PCK1/MAP3K2/BRAF/PPIP5K2/MAP3K5/TNIK/PFKP/MKNK2/CSNK1G2/IKBKB/IRAK3/MARK2/SYK/PTK2/S…
GOMF_CELL_ADHESION_MOLECULE_BINDING	GOMF_CELL_ADHESION_MOLECULE_BINDING	333	0.391828	1.37392	0.0063768	0.126486	0.115411	1747	tags=34%, list=18%, signal=29%	OLFM4/ADAM9/SPTBN1/RPS26/TLN1/TSPAN8/NDRG1/CDHR2/DST/LIMA1/KTN1/ITGB8/AHNAK/SPP1/S100P/ITGA2/CTNND1/CLINT1/ITGB6/AFDN/TJP2/ARGLU1/EPS8L2/LRRFIP1/CDH1/CD2AP/EZR/CSNK1D/CGN/CDHR5/CEMIP2/PLEC/PKP2/BSG/ARHGAP18/CHMP2B/NUMB/SEPTIN9/NPNT/P4HB/PKN2/PRKCA/FNBP1L/KIF5B/BAIAP2L1/MACF1/SNX9/COBLL1/EIF3E/HDLBP/SPTAN1/CTNNA1/GOLGA2/PKP3/UTRN/CORO1B/JUP/CASR/LARP1/KRT18/YWHAZ/EIF4G2/GIGYF2/SHTN1/EIF2A/PTPRH/GO…
GOBP_EPITHELIAL_CELL_PROLIFERATION	GOBP_EPITHELIAL_CELL_PROLIFERATION	197	-0.372531	-1.50411	0.00637941	0.126486	0.115411	637	tags=17%, list=7%, signal=16%	ZNF703/NME1/PDCD6/LAMC1/TNFSF12/FGF1/EPHA2/STRAP/ID2/NCSTN/B4GALT1/IRF6/BAX/PHB2/SNAI2/EGFL7/ID1/RUNX3/HMGB2/VEGFB/NR4A1/KRT4/CD109/NME2/CXCL12/B2M/CCND1/IGF1/IGFBP3/SERPINB5/SERPINF1/THBS1/SFRP2/SPARC
GOMF_MYOSIN_BINDING	GOMF_MYOSIN_BINDING	38	0.592553	1.5994	0.00643217	0.126486	0.115411	1476	tags=42%, list=15%, signal=36%	LLGL2/TRAK1/SLC9A3R1/ARFGEF1/VEZT/LMTK2/RAB27B/GSN/RAB6A/MLPH/RAB3B/SHROOM1/RALA/NPC1L1/ARFGEF2/RAB10
GOBP_DETOXIFICATION	GOBP_DETOXIFICATION	58	-0.487173	-1.66304	0.00644931	0.126486	0.115411	716	tags=29%, list=7%, signal=27%	GSTO2/PRDX5/PRXL2C/PRDX1/NXN/MGST2/BMP7/PRDX2/PRDX6/PRDX4/PRDX3/PTGES/MT1M/MT1G/MT1X/MT1E/MT2A
GOBP_REGULATION_OF_PROTEIN_LOCALIZATION_TO_CELL_PERIPHERY	GOBP_REGULATION_OF_PROTEIN_LOCALIZATION_TO_CELL_PERIPHERY	70	0.512459	1.53043	0.00648713	0.126486	0.115411	1547	tags=34%, list=16%, signal=29%	SPTBN1/AGR2/SQSTM1/LGALS3/PLS1/EZR/NUMB/NUMA1/KIF5B/CLTC/STX7/MISP/PRKCI/EPB41L2/VIL1/LRP1/GRIPAP1/EPB41/LYPLA1/ITGB1/PICALM/PDPK1/APPL1/VTI1B
GOBP_NEGATIVE_REGULATION_OF_CELL_POPULATION_PROLIFERATION	GOBP_NEGATIVE_REGULATION_OF_CELL_POPULATION_PROLIFERATION	333	-0.314682	-1.32497	0.0065044	0.126486	0.115411	489	tags=13%, list=5%, signal=12%	BTG3/BMP7/TGFBR2/PPP2R5C/STRAP/ETS1/IFITM1/CAMK2N1/E2F1/B4GALT1/IRF6/BAX/PHB2/CERS2/SNAI2/PTPRU/PRDX4/PDCD5/CTNNB1/NIBAN2/RUNX3/BTG1/ADAMTS1/PTGES/TIMP2/KRT4/CD109/B2M/PRNP/CLDN3/APOD/SFRP4/CDKN2A/IGFBP3/S100A11/HSPA1A/SERPINF1/THBS1/FBLN1/SFRP2/SPARC/IGFBP7
GOCC_LYSOSOMAL_LUMEN	GOCC_LYSOSOMAL_LUMEN	56	-0.515402	-1.72996	0.00651571	0.126486	0.115411	760	tags=20%, list=8%, signal=18%	HEXB/GM2A/TXNDC5/NEU1/PPT1/CTSF/CTSL/CTSB/BGN/LUM/DCN
GOMF_SOLUTE_SODIUM_SYMPORTER_ACTIVITY	GOMF_SOLUTE_SODIUM_SYMPORTER_ACTIVITY	16	0.729466	1.7021	0.00653045	0.126486	0.115411	1726	tags=62%, list=18%, signal=51%	SLC4A4/SLC6A8/SLC6A20/SLC38A1/SLC1A1/SLC20A2/SLC12A2/SLC5A3/SLC4A7/SLC28A3
GOCC_COATED_VESICLE	GOCC_COATED_VESICLE	182	0.43942	1.47437	0.00655546	0.126486	0.115411	1800	tags=31%, list=19%, signal=26%	SERPINA1/CFTR/CLTA/MYO6/EREG/CLINT1/CCDC88A/TGOLN2/HBEGF/LDLR/SEC31A/HIP1R/APP/NUMB/CD59/SNX9/CLTC/KDELR1/HLA-E/GOLGA2/AP1G2/HLA-B/RAB27B/HLA-DRB1/HLA-A/SYNRG/IGF2R/F5/PIK3C2A/COPG1/COPB1/REEP6/AREG/DNM2/UNC13D/HLA-DRB5/DVL1/AP2B1/LRP1/CEMIP/AFTPH/AP2A2/RAB5A/TFRC/STEAP2/PICALM/VTI1B/FZD5/EPN2/AP3B1/VPS41/USO1/EPN1/YIPF5/CTSC/FCHO2
GOBP_REGULATION_OF_PROTEIN_DEPOLYMERIZATION	GOBP_REGULATION_OF_PROTEIN_DEPOLYMERIZATION	52	0.553894	1.57626	0.00665651	0.127927	0.116725	1615	tags=35%, list=17%, signal=29%	SPTBN1/TRIM54/LIMA1/ADD3/BMERB1/TAOK1/SPTAN1/VILL/GSN/EPS8/PLEKHH2/VIL1/SCIN/APC/ADD1/SWAP70/CARMIL1/F2RL1
GOBP_HISTONE_H3_K9_METHYLATION	GOBP_HISTONE_H3_K9_METHYLATION	20	0.680825	1.64108	0.00701136	0.134213	0.122462	1218	tags=40%, list=13%, signal=35%	MECOM/ATRX/ARID4A/KDM3A/SETD5/ZNF274/ASH1L/RIF1
GOBP_ESTABLISHMENT_OR_MAINTENANCE_OF_CELL_POLARITY	GOBP_ESTABLISHMENT_OR_MAINTENANCE_OF_CELL_POLARITY	133	0.460023	1.48727	0.00710808	0.135529	0.123662	2026	tags=39%, list=21%, signal=31%	DST/LLGL2/PATJ/SLC9A3R1/MAP7/ARFGEF1/FBXW11/NUMA1/ERBIN/CTNNA1/PAK1/MISP/PRKCI/ROCK1/GSK3B/GSN/SHTN1/MAP4/PDCD6IP/PARD6B/MYO9A/MYO18A/HSP90AB1/WEE1/CDC42BPB/TCIRG1/FAT1/RNF41/MYH9/CYTH1/FRMD4B/ITGB1/MARK2/PTK2/PAFAH1B1/CKAP5/RUFY3/RAB10/KRIT1/RND1/HSP90AA1/DCTN1/ACTR2/ARHGAP35/PARD3/CDK5RAP2/SYNJ2BP/RAB11FIP2/PKHD1/ACTR3/RHOD/STK11
GOBP_ANTIMICROBIAL_HUMORAL_RESPONSE	GOBP_ANTIMICROBIAL_HUMORAL_RESPONSE	44	0.574818	1.59671	0.00715733	0.135933	0.124031	778	tags=39%, list=8%, signal=36%	LYZ/CXCL5/PGC/CLU/CXCL8/LCN2/PI3/CXCL1/PRSS2/CXCL2/DEFB1/CXCL3/CXCL6/GATA6/HLA-E/ANG/HLA-A
GOBP_HORMONE_BIOSYNTHETIC_PROCESS	GOBP_HORMONE_BIOSYNTHETIC_PROCESS	31	0.617921	1.60636	0.00722143	0.136615	0.124653	1175	tags=26%, list=12%, signal=23%	DUOX2/SRD5A3/HSD17B2/ATP1A1/HIF1A/HSD17B11/HSD17B12/REST
GOBP_HORMONE_METABOLIC_PROCESS	GOBP_HORMONE_METABOLIC_PROCESS	92	0.485129	1.50373	0.00734203	0.138356	0.126241	1496	tags=33%, list=15%, signal=28%	DUOX2/CYP3A5/DUOXA2/SRD5A3/SPP1/ALDH1A1/HSD17B2/IYD/BACE2/TCF7L2/CYP2S1/ATP1A1/AKR1B10/HIF1A/TIPARP/PCSK5/HSD17B11/RDH11/CYP2C18/SULT1B1/HSD17B12/SULT1E1/ACE/ADH1C/PNPLA2/REST/AKR1C3/CPQ/PLEKHA1/DHRS3
GOCC_TERTIARY_GRANULE	GOCC_TERTIARY_GRANULE	93	0.494504	1.53764	0.00742517	0.13938	0.127176	1781	tags=32%, list=18%, signal=27%	OLFM4/LYZ/CYSTM1/CXCL1/TCN1/PLD1/LGALS3/ATP6V0A1/CD59/SPTAN1/STX7/LRG1/DIAPH1/CTSD/OLR1/COPB1/NBEAL2/TCIRG1/PRSS3/ATP11A/GAA/AP2A2/IDH1/GSDMD/STOM/TMC6/LTF/TMEM63A/CANT1/METTL7A
GOBP_L_AMINO_ACID_TRANSPORT	GOBP_L_AMINO_ACID_TRANSPORT	32	0.61117	1.60311	0.00756384	0.140639	0.128325	2276	tags=44%, list=23%, signal=34%	SLC3A1/SLC6A20/SLC38A1/SLC1A1/ARL6IP1/SLC7A11/SLC38A5/ITGB1/SLC43A1/PSEN1/SLC25A13/PER2/CLN8/SLC3A2
GOMF_GTPASE_BINDING	GOMF_GTPASE_BINDING	163	0.450865	1.48984	0.00756606	0.140639	0.128325	1628	tags=28%, list=17%, signal=23%	SPTBN1/NDRG1/GOLGA4/CLTA/FGD4/RGP1/GCC2/AFDN/OPTN/BICD1/AKAP13/FGD6/FNBP1L/AIMP1/ERRFI1/TRIP11/PAK1/CCDC186/PPP1R9A/CDC42EP4/MICALL2/IPO7/IQGAP2/EPS8/ENO1/MLPH/XPO5/UNC13D/GOLGA5/NSF/EVI5/KIF3B/STRN3/RNF41/GGA3/NPC1L1/RTKN/PICALM/BECN1/HSP90AA1/ABI2/RGL3/ATG14/MICAL1/KIF3A
GOMF_TRANSFERASE_ACTIVITY_TRANSFERRING_SULFUR_CONTAINING_GROUPS	GOMF_TRANSFERASE_ACTIVITY_TRANSFERRING_SULFUR_CONTAINING_GROUPS	26	0.648232	1.64173	0.00760699	0.140639	0.128325	914	tags=19%, list=9%, signal=17%	SULT1C2/HS3ST1/TST/SULT1B1/SULT1E1
GOMF_BETA_CATENIN_BINDING	GOMF_BETA_CATENIN_BINDING	50	0.555132	1.57756	0.00760838	0.140639	0.128325	1758	tags=42%, list=18%, signal=35%	PTPRK/SOX9/CDH1/SLC9A3R1/CD2AP/FOXO3/CDHR5/TCF7L2/NUMB/CHD8/CTNNA1/TBL1XR1/GSK3B/SMAD3/DVL1/APC/KLF4/KDM6B/CARM1/PSEN1/EP300
GOBP_MITOCHONDRIAL_RESPIRATORY_CHAIN_COMPLEX_ASSEMBLY	GOBP_MITOCHONDRIAL_RESPIRATORY_CHAIN_COMPLEX_ASSEMBLY	81	-0.462428	-1.63986	0.00772291	0.14208	0.12964	1582	tags=43%, list=16%, signal=36%	COX16/DMAC1/TTC19/NDUFA2/NDUFA9/COX20/COA5/SURF1/TMEM126B/SAMM50/NDUFS3/NDUFS4/NDUFAF3/COA3/NDUFB6/SLC25A33/NDUFA6/COX14/NDUFA11/NDUFA3/NDUFC2/MT-ND1/NDUFB4/MT-ND2/COX17/MT-ND3/NDUFA12/NDUFS5/PET100/UQCRFS1/NDUFB2/NDUFB3/NDUFAB1/NDUFS6/NDUFA1
GOBP_POSITIVE_REGULATION_OF_IMMUNE_SYSTEM_PROCESS	GOBP_POSITIVE_REGULATION_OF_IMMUNE_SYSTEM_PROCESS	452	-0.298739	-1.31159	0.00774502	0.14208	0.12964	860	tags=17%, list=9%, signal=16%	HAX1/TNIP2/S100A14/SELENOK/PSMD9/CDC42/PSMC2/HLA-G/PHB/MUC13/PSMA7/BRK1/DHX9/CDKN1A/PRKACA/MUC21/FLOT2/EDN2/PHPT1/PTPN22/SERPING1/PSMB2/ARPC5/PSMB3/RAC2/SKP1/ADAM10/FYN/CFD/PSMB7/TGFBR2/VCAM1/IFI16/PSMD8/BAX/LIME1/UBE2N/SUSD4/NECTIN2/HLA-F/ACTB/C1QBP/PSMB5/SOCS1/PSMA2/RPS3/HSPH1/PSMD4/RUNX3/HMGB2/VEGFB/CD81/CXCL14/PSMB4/IGLC2/CXCL12/MUC4/IGHA1/B2M/PRNP/RPS19/IGF1/C7/IGHG2/MUC5AC/A2M/ANXA1/THBS1/S…
GOBP_MODIFIED_AMINO_ACID_TRANSPORT	GOBP_MODIFIED_AMINO_ACID_TRANSPORT	14	0.750854	1.69961	0.00786072	0.143658	0.13108	887	tags=36%, list=9%, signal=33%	SLC3A1/SLC9A3R1/SLC6A8/SLC6A20/SLC7A11
GOCC_RUFFLE	GOCC_RUFFLE	112	0.472563	1.50046	0.00797204	0.144792	0.132114	1623	tags=35%, list=17%, signal=29%	TLN1/MYO6/LIMA1/FGD4/EPS8L2/CLCN3/SLC9A3R1/CD2AP/HIP1R/EZR/EPS8L3/ARHGAP18/CLIP1/FGD6/MACF1/SNX9/TESC/PAK1/DIAPH1/ROCK1/GSN/CFL1/EPS8/DNM2/VIL1/PSD4/APC/MYH9/PACSIN2/FRMD4B/RAB5A/ITGB1/PLEKHA1/DDX58/SH3YL1/APPL1/PTK6/ACAP2/C2CD5
GOBP_MECHANORECEPTOR_DIFFERENTIATION	GOBP_MECHANORECEPTOR_DIFFERENTIATION	28	0.629397	1.60774	0.00798257	0.144792	0.132114	742	tags=36%, list=8%, signal=33%	SLC44A4/MYO6/SDC4/SLC9A3R1/PLS1/USH1C/ESRP1/TRIP11/ATP8B1/JAG1
GOBP_DETECTION_OF_BIOTIC_STIMULUS	GOBP_DETECTION_OF_BIOTIC_STIMULUS	12	0.762861	1.6909	0.00807462	0.14523	0.132514	778	tags=42%, list=8%, signal=38%	CDHR2/HLA-B/PAK1/HLA-DRB1/HLA-A
GOBP_ACUTE_INFLAMMATORY_RESPONSE	GOBP_ACUTE_INFLAMMATORY_RESPONSE	40	0.591134	1.604	0.00809952	0.14523	0.132514	1508	tags=40%, list=16%, signal=34%	SERPINA3/SERPINA1/CRP/PLSCR1/VNN1/SAA1/F3/SAA2/HLA-E/APCS/EXT1/ASH1L/TNFRSF11A/C2CD4B/ICAM1/EIF2AK1
GOBP_BONE_REMODELING	GOBP_BONE_REMODELING	45	0.577908	1.60922	0.00813375	0.14523	0.132514	1396	tags=29%, list=14%, signal=25%	CLDN18/PDK4/CA2/TNFRSF11B/SPP1/PRKCA/EFNA2/LGR4/TCIRG1/NF1/TNFRSF11A/SYK/TFRC
GOBP_PEPTIDYL_LYSINE_METHYLATION	GOBP_PEPTIDYL_LYSINE_METHYLATION	77	0.511282	1.54712	0.00815028	0.14523	0.132514	1646	tags=30%, list=17%, signal=25%	MECOM/KMT2E/ATRX/BRD4/KMT2C/NSD3/OGT/KMT2A/IWS1/ARID4A/KDM3A/MLLT6/SETD2/SETD5/ZNF274/ASH1L/RIF1/SNW1/NELFE/SUPT6H/CTR9/TET2/KMT2D
GOBP_FEAR_RESPONSE	GOBP_FEAR_RESPONSE	11	0.771459	1.68139	0.00815665	0.14523	0.132514	981	tags=45%, list=10%, signal=41%	VDAC1/SLC1A1/EIF4G1/RPS6KB1/EXT1
GOBP_CELLULAR_TRANSITION_METAL_ION_HOMEOSTASIS	GOBP_CELLULAR_TRANSITION_METAL_ION_HOMEOSTASIS	66	-0.491914	-1.70626	0.00823919	0.146163	0.133365	531	tags=17%, list=5%, signal=16%	SKP1/ISCU/ARF1/NEDD8/SLC39A4/PRNP/MT1M/MT1G/MT1X/MT1E/MT2A
GOBP_LEUKOCYTE_MIGRATION	GOBP_LEUKOCYTE_MIGRATION	198	-0.358039	-1.43686	0.0083545	0.147667	0.134738	368	tags=17%, list=4%, signal=16%	GBF1/CXCL16/EDN2/RAC2/ADAM10/FYN/VCAM1/B4GALT1/DUSP1/SHC1/C1QBP/ITGA5/PPIA/VEGFB/CD81/CKLF/CXCL14/IGLC2/NBL1/CXCL12/ST3GAL4/IGHA1/RPS19/APOD/FN1/ANXA1/THBS1/COL1A1/SERPINE1/COL1A2/RARRES2/IGLC1/IGKC
GOBP_INFLAMMATORY_RESPONSE	GOBP_INFLAMMATORY_RESPONSE	314	0.389777	1.35771	0.00840224	0.147971	0.135015	1393	tags=22%, list=14%, signal=19%	SERPINA3/SERPINA1/CCL20/LYZ/CXCL5/BIRC3/NEAT1/CXCL8/DUOXA2/NFKBIZ/MGLL/CRP/CXCL1/CXCL2/SPP1/STAT3/ITGA2/CXCL3/ITGB6/LDLR/ABCF1/TNIP1/PLSCR1/ELF3/BRD4/CXCL6/VNN1/APP/SAA1/STK39/GPRC5B/F3/IRF3/AIMP1/SAA2/GRN/HLA-E/LY75/HIF1A/FOXP1/C1QTNF12/IL18/XIAP/CXCL17/NFX1/HLA-DRB1/VPS35/ZC3H12A/OLR1/APCS/NFKBIA/EXT1/TCIRG1/UNC13D/ASH1L/SMAD3/TNFRSF11A/CELF1/NFE2L2/C2CD4B/SBNO2/PJA2/KLF4/NAPEPLD/IKBKB/ITGB1/GS…
GOBP_VESICLE_MEDIATED_TRANSPORT_TO_THE_PLASMA_MEMBRANE	GOBP_VESICLE_MEDIATED_TRANSPORT_TO_THE_PLASMA_MEMBRANE	64	0.517333	1.52475	0.00850012	0.148119	0.13515	1664	tags=33%, list=17%, signal=27%	SPTBN1/GOLGA4/OPTN/SLC1A1/MACF1/KRT18/EXOC1/VPS35/ANK3/AMN/DNM2/NSF/GRIPAP1/ANKRD50/GGA3/ARFGEF2/LYPLA1/STEAP2/RAB10/RAB7A/CCDC93
GOBP_SENSORY_PERCEPTION_OF_CHEMICAL_STIMULUS	GOBP_SENSORY_PERCEPTION_OF_CHEMICAL_STIMULUS	14	0.747267	1.69149	0.0085024	0.148119	0.13515	300	tags=14%, list=3%, signal=14%	PIGR/AZGP1
GOCC_MICROVILLUS_MEMBRANE	GOCC_MICROVILLUS_MEMBRANE	14	0.74698	1.69084	0.0085024	0.148119	0.13515	819	tags=43%, list=8%, signal=39%	CDHR2/S100P/SLC9A3R1/EZR/CDHR5/PTPRH
GOBP_TRANSITION_METAL_ION_HOMEOSTASIS	GOBP_TRANSITION_METAL_ION_HOMEOSTASIS	80	-0.4543	-1.60444	0.00872131	0.150993	0.137772	428	tags=21%, list=4%, signal=20%	STEAP1/ATOX1/COMMD1/CYBRD1/GLRX3/SKP1/ISCU/ARF1/NEDD8/SLC39A4/B2M/PRNP/MT1M/MT1G/MT1X/MT1E/MT2A
GOBP_HAIR_CELL_DIFFERENTIATION	GOBP_HAIR_CELL_DIFFERENTIATION	21	0.67454	1.64092	0.0087541	0.150993	0.137772	742	tags=33%, list=8%, signal=31%	SLC44A4/MYO6/SLC9A3R1/PLS1/USH1C/ESRP1/JAG1
GOCC_AXON	GOCC_AXON	274	0.40244	1.39374	0.00877638	0.150993	0.137772	1914	tags=32%, list=20%, signal=26%	SPTBN1/DST/CA2/ITGA2/TRAK1/CTNND1/SYT13/CLCN3/MAP7/CD2AP/APP/BSG/FBXW11/KIF5B/SLC1A1/MYH14/DHX36/HIF1A/UTRN/LMTK2/CPEB4/PAK1/DYNC1H1/ANG/CASR/PPP1R9A/EXOC7/EIF4G2/RAB27B/GSK3B/AP3D1/MX1/SHTN1/EPS8/ANK3/MAP4/SETX/MYO9A/NFIB/HSP90AB1/ABI1/DNM2/MAPK8IP3/HSPB1/DVL1/TANC2/LRP1/NF1/DICER1/GRIPAP1/KIF3B/SMURF1/PCLO/EEA1/MPP5/SEMA6A/SMIM31/MAP9/NDRG2/FXR1/RAB5A/PAFAH1B1/NECTIN3/PRKAA1/RUFY3/PRSS12/HSP90A…
GOBP_ESTABLISHMENT_OF_PLANAR_POLARITY_OF_EMBRYONIC_EPITHELIUM	GOBP_ESTABLISHMENT_OF_PLANAR_POLARITY_OF_EMBRYONIC_EPITHELIUM	11	-0.809253	-1.91395	0.00881509	0.150993	0.137772	51	tags=27%, list=1%, signal=27%	GRHL3/CTHRC1/SFRP2
GOBP_ORGANIC_CATION_TRANSPORT	GOBP_ORGANIC_CATION_TRANSPORT	15	0.704669	1.624	0.00882325	0.150993	0.137772	323	tags=20%, list=3%, signal=19%	SLC44A4/SLC22A18/SLC6A20
GOMF_CYTOKINE_BINDING	GOMF_CYTOKINE_BINDING	40	-0.570218	-1.822	0.00885628	0.151025	0.137801	860	tags=25%, list=9%, signal=23%	HAX1/TWSG1/TNFRSF1B/TGFBR2/ENG/PLP2/CD109/NBL1/A2M/THBS1
GOBP_AGING	GOBP_AGING	164	-0.383266	-1.50669	0.00891024	0.151085	0.137856	773	tags=17%, list=8%, signal=16%	HLA-G/PPP3CA/CNP/CDKN1A/GJB2/TNFRSF1B/IRAK1/YPEL3/TGFBR2/VCAM1/ID2/MT-ATP6/MMP7/CACYBP/UCP2/TIMP2/ASS1/B2M/PRNP/APOD/CDKN2A/COL4A2/TIMP1/SERPINF1/SERPINE1/KRT14/KRT16/DCN
GOBP_MYELOID_LEUKOCYTE_MEDIATED_IMMUNITY	GOBP_MYELOID_LEUKOCYTE_MEDIATED_IMMUNITY	332	0.382493	1.341	0.00895714	0.151085	0.137856	1832	tags=28%, list=19%, signal=24%	SERPINA3/SERPINA1/OLFM4/PIGR/LYZ/CYSTM1/LCN2/PA2G4/CXCL1/PRSS2/CEACAM6/TCN1/S100P/DDX21/KMT2E/PLD1/RNASET2/LGALS3/ATP6V0A1/CXCL6/VNN1/CD59/PDAP1/ALDH3B1/GRN/HLA-E/SPTAN1/PLAC8/DHX36/AOC1/HLA-B/JUP/DYNC1H1/SERPINB3/LRG1/DIAPH1/ROCK1/FUCA2/GSN/FRK/RAB5B/IGF2R/CTSD/MVP/OLR1/IQGAP2/RAB6A/CEP290/COPB1/ACE/HSP90AB1/NBEAL2/TCIRG1/UNC13D/PSMD7/IST1/PRSS3/ATP11A/GAA/AP2A2/IDH1/GSDMD/DNAJC13/SYK/DDX58/GLB1…
GOBP_NEGATIVE_REGULATION_OF_DEVELOPMENTAL_PROCESS	GOBP_NEGATIVE_REGULATION_OF_DEVELOPMENTAL_PROCESS	394	-0.29818	-1.27261	0.0089628	0.151085	0.137856	987	tags=18%, list=10%, signal=17%	RUNX1/GDI1/SKIL/HES1/PIAS3/TSPO/CIB1/NFATC2/SPRY1/RCC2/FOXO1/PDCD4/SORT1/TWSG1/PAF1/HPN/YBX3/HLA-G/PPP3CA/TMEM176B/CCDC85B/CDKN1A/NME1/BCL11A/NKD1/AMOT/TGFB1I1/BMP7/ACTN4/TGFBR2/EPHA2/ADIPOR1/FSTL3/STRAP/ZNF706/ID2/RGS2/E2F1/SPART/PRDX2/CERS2/SNAI2/NAXE/SOCS1/ATP2B4/KLF2/ID1/CTNNB1/IRX3/NIBAN2/BAMBI/RUNX3/ADAMTS1/CXCL14/NME2/B2M/CCND1/IGF1/EFEMP1/COL4A2/HOPX/SERPINF1/ANXA1/THBS1/ID3/SERPINE1/FBLN…
GOBP_CYTOKINESIS	GOBP_CYTOKINESIS	94	0.481298	1.502	0.00900435	0.151085	0.137856	2237	tags=35%, list=23%, signal=27%	SPTBN1/SON/CHMP2B/CHMP4C/SEPTIN9/PKN2/SNX9/CSPP1/ANXA11/BIRC6/PRPF40A/ROCK1/SETD2/ANK3/PDCD6IP/CUL7/APC/KIF3B/IST1/MYH9/MAP9/RTKN/BECN1/SPIRE2/ACTR2/SVIL/SEPTIN11/ACTR3/STAMBP/CDC14B/SPIRE1/RAB11FIP4/CHMP1A
GOBP_REGULATION_OF_CHROMATIN_ORGANIZATION	GOBP_REGULATION_OF_CHROMATIN_ORGANIZATION	119	0.467375	1.4996	0.00901581	0.151085	0.137856	2137	tags=36%, list=22%, signal=29%	RESF1/VEGFA/KMT2E/ATRX/BRD4/TAF7/NSD3/OGT/KMT2A/UBR5/IWS1/KDM3A/MAPK3/MLLT6/MPHOSPH8/HNRNPU/TRIP12/SPTY2D1/NIPBL/ATAD2B/SETD5/ZNF274/RIF1/KAT2A/SNW1/NELFE/OTUB1/SUPT6H/KDM5A/BCL6/TPR/MTHFR/CTR9/TLK2/WBP2/TASOR/PARP10/RNF20/SDR16C5/CAMK2D/ATF7IP/TLK1/MLLT3
GOBP_NUCLEAR_MIGRATION	GOBP_NUCLEAR_MIGRATION	13	0.742472	1.65794	0.00905014	0.151137	0.137904	1716	tags=69%, list=18%, signal=57%	SYNE2/SLC9A3R1/FBXW11/DYNC1H1/PCM1/PAFAH1B1/DCTN1/HOOK3/CLMN
GOBP_INTEGRATED_STRESS_RESPONSE_SIGNALING	GOBP_INTEGRATED_STRESS_RESPONSE_SIGNALING	24	0.662897	1.66096	0.00910113	0.151467	0.138204	1915	tags=46%, list=20%, signal=37%	CXCL8/AGR2/DDIT3/IMPACT/PPP1R15A/HSPA5/NFE2L2/EIF2AK1/TMEM33/ATF3/PPP1R15B
GOCC_IMMUNOGLOBULIN_COMPLEX	GOCC_IMMUNOGLOBULIN_COMPLEX	11	-0.808071	-1.91115	0.00917006	0.151764	0.138476	136	tags=73%, list=1%, signal=72%	LIME1/IGLC2/IGHA1/IGHG2/IGHG1/IGHG4/IGLC1/IGKC
GOBP_RIBONUCLEOSIDE_TRIPHOSPHATE_BIOSYNTHETIC_PROCESS	GOBP_RIBONUCLEOSIDE_TRIPHOSPHATE_BIOSYNTHETIC_PROCESS	47	-0.515837	-1.66891	0.00918169	0.151764	0.138476	1171	tags=51%, list=12%, signal=45%	MT-ATP8/NME7/ATP5MC3/DGUOK/PINK1/STOML2/PARP1/ATP5PO/NUDT2/MT-CO2/VCP/ATP5F1A/ATP5MC2/ATP5F1D/NME1/IMPDH2/NME3/ATP5PF/ATP5MG/ATP5F1E/MT-ATP6/ATP5ME/NME2/TMSB4X
GOBP_POSITIVE_REGULATION_OF_PROTEIN_LOCALIZATION_TO_CELL_PERIPHERY	GOBP_POSITIVE_REGULATION_OF_PROTEIN_LOCALIZATION_TO_CELL_PERIPHERY	37	0.588566	1.58353	0.00925553	0.152328	0.13899	1491	tags=41%, list=15%, signal=34%	SPTBN1/AGR2/SQSTM1/LGALS3/PLS1/EZR/NUMA1/KIF5B/PRKCI/EPB41L2/VIL1/LRP1/EPB41/ITGB1/PDPK1
GOBP_GAMETE_GENERATION	GOBP_GAMETE_GENERATION	261	0.410781	1.41615	0.00927868	0.152328	0.13899	1784	tags=26%, list=18%, signal=22%	SPINK1/ABHD2/TSPAN8/CFTR/ADAM28/EREG/DEFB1/ACOX1/SOX9/SRPK1/ATRX/AFF4/TESK1/DIAPH2/FBXW11/HERC4/TMF1/CEP57/DHX36/UBR2/ARID4A/KDM3A/ANG/TRIM27/TUT4/PRKAR1A/ANKRD49/IGF2R/GOLGA3/YY1/AGFG1/RPS6KB1/GAMT/SETX/ACE/HPGD/SERPINA5/LGR4/SUN1/DNM2/TUT7/PSME4/PGM3/CELF1/PIAS1/SMAD5/SPAG16/CCNI/NRIP1/HOOK1/RAI14/ZNF148/PAFAH1B1/PLEKHA1/KDM5A/NECTIN3/BCL6/GGNBP2/FOXA3/XRN2/CALR/SPIRE2/ZNF830/KMT2D/AP3B1/LARP7/…
GOBP_REGULATION_OF_MITOCHONDRIAL_MEMBRANE_POTENTIAL	GOBP_REGULATION_OF_MITOCHONDRIAL_MEMBRANE_POTENTIAL	45	-0.551102	-1.77092	0.00937129	0.153328	0.139903	1208	tags=38%, list=12%, signal=33%	MTLN/STOML2/NNT/PARP1/BAD/TSPO/PMAIP1/VCP/SLC25A33/BID/HEBP2/SPART/BAX/PRELID1/PRDX3/UCP2/DCN
GOMF_PROTEASE_BINDING	GOMF_PROTEASE_BINDING	75	-0.47019	-1.64756	0.00943193	0.153801	0.140334	259	tags=17%, list=3%, signal=17%	SUMO1/TIMP2/PRNP/UBC/CSTA/FN1/TIMP1/A2M/TIMP3/COL1A1/SERPINE1/COL1A2/COL3A1
GOCC_SPECIFIC_GRANULE	GOCC_SPECIFIC_GRANULE	88	0.495374	1.53267	0.00979359	0.159018	0.145095	884	tags=20%, list=9%, signal=19%	OLFM4/LYZ/LCN2/CXCL1/TCN1/CLCN3/PLD1/CD59/ALDH3B1/SPTAN1/ANXA11/AOC1/JUP/LRG1/FRK/CTSD/OLR1/CEP290
GOBP_RIBOSOMAL_LARGE_SUBUNIT_BIOGENESIS	GOBP_RIBOSOMAL_LARGE_SUBUNIT_BIOGENESIS	62	-0.474238	-1.63614	0.00981756	0.159018	0.145095	454	tags=24%, list=5%, signal=23%	NOP53/RSL24D1/RPL35A/GTF3A/RPL23A/SNU13/MRPL20/RPL5/RPL10A/RPL26/RPL10/RPLP0/RPL11/RPL7A/RPL3
GOCC_CLATHRIN_COATED_VESICLE	GOCC_CLATHRIN_COATED_VESICLE	108	0.469077	1.47865	0.00985722	0.159128	0.145195	1800	tags=36%, list=19%, signal=30%	CFTR/CLTA/MYO6/EREG/CLINT1/TGOLN2/HBEGF/LDLR/HIP1R/NUMB/SNX9/CLTC/AP1G2/RAB27B/HLA-DRB1/SYNRG/IGF2R/PIK3C2A/REEP6/AREG/DNM2/UNC13D/HLA-DRB5/DVL1/AP2B1/LRP1/CEMIP/AFTPH/AP2A2/RAB5A/TFRC/STEAP2/PICALM/FZD5/EPN2/AP3B1/VPS41/EPN1/FCHO2
GOBP_RESPONSE_TO_TEMPERATURE_STIMULUS	GOBP_RESPONSE_TO_TEMPERATURE_STIMULUS	136	-0.388266	-1.4864	0.0100144	0.16072	0.146647	1033	tags=25%, list=11%, signal=23%	HIKESHI/HSBP1/ACADVL/RBBP7/FOXO1/MT-CO2/VCP/PDCL3/GMPR/METRNL/CDKN1A/PRKACA/MAPKAPK2/PDCD6/DNAJB6/IRAK1/TGFB1I1/STUB1/LXN/FGF1/DNAJA1/RPA3/BAG1/SUMO1/HSPH1/UCP2/MT-CYB/CXCL12/ATP2A2/ANO1/IGF1/HSPA1A/THBS1/IGFBP7
GOMF_DNA_DEPENDENT_ATPASE_ACTIVITY	GOMF_DNA_DEPENDENT_ATPASE_ACTIVITY	29	0.618907	1.60092	0.0100222	0.16072	0.146647	853	tags=28%, list=9%, signal=25%	BPTF/ATRX/CHD8/DHX36/SMARCA4/RFC1/SMARCA1/SMARCA5
GOBP_NEGATIVE_REGULATION_OF_REPRODUCTIVE_PROCESS	GOBP_NEGATIVE_REGULATION_OF_REPRODUCTIVE_PROCESS	20	-0.67502	-1.7919	0.0101972	0.162792	0.148538	483	tags=35%, list=5%, signal=33%	BMP7/DUSP1/PRDX4/IGF1/ARHGDIB/TIMP1/SERPINF1
GOCC_CORTICAL_ACTIN_CYTOSKELETON	GOCC_CORTICAL_ACTIN_CYTOSKELETON	44	0.563363	1.56489	0.0102186	0.162792	0.148538	1953	tags=52%, list=20%, signal=42%	SPTBN1/SHROOM3/LLGL2/CDH1/PLS1/AKAP13/SNX9/SPTAN1/UTRN/MISP/PPP1R9A/GSN/EPB41L2/MLPH/PLEKHH2/LASP1/SHROOM1/MYH9/RTKN/ACTR2/DCDC2/CTTN/MAEA
GOBP_NEGATIVE_REGULATION_OF_ACTIN_FILAMENT_DEPOLYMERIZATION	GOBP_NEGATIVE_REGULATION_OF_ACTIN_FILAMENT_DEPOLYMERIZATION	28	0.615696	1.57274	0.0103214	0.16389	0.14954	1804	tags=50%, list=19%, signal=41%	SPTBN1/LIMA1/ADD3/SPTAN1/VILL/GSN/EPS8/PLEKHH2/VIL1/SCIN/ADD1/SWAP70/CARMIL1/SVIL
GOMF_OXIDOREDUCTASE_ACTIVITY_ACTING_ON_PAIRED_DONORS_WITH_INCORPORATION_OR_REDUCTION_OF_MOLECULAR_OXYGEN_REDUCED_FLAVIN_OR_FLAVOPROTEIN_AS_ONE_DONOR_AND_INCORPORATION_OF_ONE_ATOM_OF_OXYGEN	GOMF_OXIDOREDUCTASE_ACTIVITY_ACTING_ON_PAIRED_DONORS_WITH_INCORPORATION_OR_REDUCTION_OF_MOLECULAR_OXYGEN_REDUCED_FLAVIN_OR_FLAVOPROTEIN_AS_ONE_DONOR_AND_INCORPORATION_OF_ONE_ATOM_OF_OXYGEN	11	0.758048	1.65216	0.0105334	0.166188	0.151637	820	tags=36%, list=8%, signal=33%	CYP3A5/CYP2S1/CYP2C18/CYP4F3
GOBP_ACUTE_PHASE_RESPONSE	GOBP_ACUTE_PHASE_RESPONSE	17	0.694491	1.63408	0.0105504	0.166188	0.151637	516	tags=35%, list=5%, signal=33%	SERPINA3/SERPINA1/CRP/PLSCR1/SAA1/SAA2
GOBP_HISTONE_H3_K9_MODIFICATION	GOBP_HISTONE_H3_K9_MODIFICATION	26	0.635423	1.60929	0.0105691	0.166188	0.151637	1218	tags=35%, list=13%, signal=30%	MECOM/ATRX/KMT2A/ARID4A/KDM3A/SETD5/ZNF274/ASH1L/RIF1
GOBP_POSITIVE_REGULATION_OF_SODIUM_ION_TRANSMEMBRANE_TRANSPORTER_ACTIVITY	GOBP_POSITIVE_REGULATION_OF_SODIUM_ION_TRANSMEMBRANE_TRANSPORTER_ACTIVITY	10	0.774508	1.65002	0.0106415	0.166786	0.152182	1000	tags=60%, list=10%, signal=54%	FXYD2/ATP1B1/KIF5B/TESC/ANK3/DNM2
GOBP_HISTONE_METHYLATION	GOBP_HISTONE_METHYLATION	85	0.487088	1.49524	0.01078	0.168412	0.153666	1891	tags=32%, list=19%, signal=26%	MECOM/KMT2E/ATRX/BRD4/KMT2C/NSD3/OGT/KMT2A/IWS1/ARID4A/KDM3A/MLLT6/SETD2/SETD5/ZNF274/ASH1L/RIF1/SNW1/NELFE/SUPT6H/MTHFR/CTR9/TET2/KMT2D/CARM1/KMT5B/RNF20
GOBP_REGULATION_OF_DNA_TEMPLATED_TRANSCRIPTION_ELONGATION	GOBP_REGULATION_OF_DNA_TEMPLATED_TRANSCRIPTION_ELONGATION	41	0.581797	1.58571	0.0109152	0.169976	0.155092	2222	tags=49%, list=23%, signal=38%	BRD4/CDK12/HEXIM1/GTF2F1/DDX39B/HNRNPU/SETD5/SUPT4H1/SCAF8/WDR43/NELFE/SUPT6H/CDK13/HMGN1/LARP7/RNF8/CCNT2/ALYREF/ZMYND11/TCERG1
GOMF_GATED_CHANNEL_ACTIVITY	GOMF_GATED_CHANNEL_ACTIVITY	84	0.488126	1.49594	0.0109538	0.17003	0.155142	1643	tags=24%, list=17%, signal=20%	TMC5/CFTR/GABRP/CLCN3/KCNE3/VDAC1/TMEM37/GABRA2/TMC4/ANO9/KCNK6/CLIC1/KCNK1/GABRE/FKBP1B/KCNJ15/KCNK5/TMC6/TMEM63A/CLCN7
GOBP_RESPONSE_TO_GROWTH_FACTOR	GOBP_RESPONSE_TO_GROWTH_FACTOR	372	-0.305734	-1.28835	0.0110433	0.170425	0.155502	719	tags=16%, list=7%, signal=15%	PXN/EMD/MAPKAPK2/ITGB5/ZNF703/TNFRSF1B/GIPC1/POLR2F/PDCD6/POLR2L/HAS1/MXRA5/TGFB1I1/STUB1/EEF1A1/FGF1/FYN/BMP7/TGFBR2/EPHA2/VCAM1/FSTL3/CILP/STRAP/DOK5/RPL8/E2F1/ENG/SPART/SHC1/TMEM204/SNAI2/ITGA5/ATP2B4/ID1/PDCD5/CTNNB1/NIBAN2/BAMBI/RUNX3/RPS27A/VEGFB/NR4A1/CD109/LTBP2/NBL1/UBC/SFRP4/COL4A2/HSPA1A/ANXA1/THBS1/COL1A1/COL1A2/MT1G/SFRP2/COL3A1/LUM/DCN
GOMF_PEPTIDASE_ACTIVATOR_ACTIVITY	GOMF_PEPTIDASE_ACTIVATOR_ACTIVITY	33	-0.56316	-1.69745	0.011082	0.170425	0.155502	894	tags=27%, list=9%, signal=25%	ADRM1/VCP/CTSH/APH1A/PSENEN/BEX3/FN1/FBLN1/SFRP2
GOBP_SULFUR_COMPOUND_TRANSPORT	GOBP_SULFUR_COMPOUND_TRANSPORT	20	0.655237	1.5794	0.0111253	0.170425	0.155502	887	tags=30%, list=9%, signal=27%	SLC44A4/SLC3A1/SLC19A3/SLC9A3R1/SLC1A1/SLC7A11
GOBP_ERBB2_SIGNALING_PATHWAY	GOBP_ERBB2_SIGNALING_PATHWAY	24	0.658443	1.6498	0.0111389	0.170425	0.155502	1580	tags=50%, list=16%, signal=42%	ERBB3/EREG/HBEGF/PTPRR/PRKCA/ERBIN/GRB2/PTPN12/CDC37/GRB7/HSP90AA1/PTK6
GOCC_CONTRACTILE_FIBER	GOCC_CONTRACTILE_FIBER	95	0.474119	1.48325	0.0111882	0.170425	0.155502	1804	tags=33%, list=19%, signal=27%	SPTBN1/AHNAK2/TPM2/TRIM54/SYNE2/DST/KRT8/AHNAK/SDC4/SQSTM1/PLEC/NBR1/JUP/PAK1/NEB/PDLIM5/ANK3/ENO1/FHL2/FKBP1B/SORBS2/FXR1/NEBL/TNNT1/MYOM1/SRI/TNNC1/TPM3/PSEN1/PPP1R12A/SVIL
GOMF_SODIUM_ION_TRANSMEMBRANE_TRANSPORTER_ACTIVITY	GOMF_SODIUM_ION_TRANSMEMBRANE_TRANSPORTER_ACTIVITY	34	0.584286	1.54321	0.0111904	0.170425	0.155502	1726	tags=38%, list=18%, signal=32%	SLC4A4/SLC6A8/SLC6A20/SLC38A1/SLC1A1/ATP1A1/SLC9B2/SLC20A2/KCNK1/SLC12A2/SLC5A3/SLC4A7/SLC28A3
GOBP_OSSIFICATION	GOBP_OSSIFICATION	181	-0.351793	-1.39053	0.0113338	0.171701	0.156667	483	tags=15%, list=5%, signal=15%	SORT1/RPS15/TWSG1/FBL/PSMC2/PHB/DHX9/EGR2/PRKACA/BMP7/EPHA2/FSTL3/IFITM1/SNAI2/COL6A1/BAMBI/RUNX3/CDH11/IGF1/IGFBP3/MMP2/CTHRC1/COL1A1/ID3/COL1A2/SFRP2/SPARC/MGP
GOBP_GOLGI_ORGANIZATION	GOBP_GOLGI_ORGANIZATION	100	0.474843	1.48862	0.0113451	0.171701	0.156667	2038	tags=30%, list=21%, signal=24%	VMP1/GOLGB1/AKAP9/GCC2/CSNK1D/OPTN/ARFGEF1/DYNC2H1/TRIP11/ATP8B1/ARHGAP21/GOLGA2/GAK/MAPK3/YWHAZ/RAB2A/CUL7/STX16/MYO18A/DNM2/GOLGA5/HOOK1/FHDC1/RAB1A/CSNK1A1/USO1/VCPIP1/TMED3/TJAP1/SEC16A
GOMF_STRUCTURAL_CONSTITUENT_OF_MUSCLE	GOMF_STRUCTURAL_CONSTITUENT_OF_MUSCLE	16	0.710376	1.65755	0.0114181	0.172267	0.157183	1518	tags=50%, list=16%, signal=42%	TPM2/MYL6/ASPH/PLEC/NEB/SORBS2/NEBL/MYOM1
GOMF_CHROMATIN_BINDING	GOMF_CHROMATIN_BINDING	331	0.383622	1.3454	0.0115145	0.173182	0.158018	2241	tags=32%, list=23%, signal=25%	RAD21/SMARCC2/STAT3/SOX9/JMJD1C/ATRX/BRD4/FOXO3/GATA6/CHD7/FUS/ARID1B/TOP1/CHD8/GTF2F1/PLAC8/PWWP3A/SMARCA4/SMARCC1/TSPYL1/KDM3A/ZNHIT1/MLLT6/HNF4A/MPHOSPH8/ZC3H12A/SMARCA1/SMARCA5/TOX3/YY1/HNRNPU/SHMT2/EP400/HNRNPC/NIPBL/ATAD2B/SFPQ/ZNF274/ASH1L/SMAD3/NCOA2/ONECUT1/REST/CBX4/TOX4/DDX5/SBNO2/CREB3L1/KLF4/HMGN3/BRD3/HDAC2/KAT2A/NELFE/KDM6B/THRB/SUPT6H/PRKAA1/TSPYL4/BCL6/USP3/TPR/PBX2/ANKRD17/NAP1L…
GOBP_GROWTH	GOBP_GROWTH	466	-0.284101	-1.23794	0.0115643	0.173393	0.158211	835	tags=13%, list=9%, signal=12%	PLAA/SLC25A33/TSPYL2/WFS1/CDC42/HPN/YBX3/PPP3CA/PHB/LAMB2/CCDC85B/CDKN1A/NINJ1/SGK1/CXCL16/SLIT3/BCL11A/PPT1/NKD1/SOCS3/ARID5B/FGF1/ADAM10/TGFBR2/ADIPOR1/CHPT1/RGS2/SPART/SHC1/SELENOM/PPP1R13L/SOCS1/KLF2/CTNNB1/ADAM15/CLIC4/BTG1/LGR6/CD81/BST2/CXCL12/DCBLD2/APOD/IGF1/CDKN2A/FN1/IGFBP3/HSPA1A/ANXA1/KRT17/CD9/MT1M/MT1G/SFRP2/CRABP2/MT1X/MT1E/IGFBP7/MT2A
GOBP_CARBOHYDRATE_PHOSPHORYLATION	GOBP_CARBOHYDRATE_PHOSPHORYLATION	16	0.708807	1.65389	0.0116315	0.17347	0.158281	840	tags=25%, list=9%, signal=23%	PFKFB3/HKDC1/HK2/GNE
GOBP_POSITIVE_REGULATION_OF_CELL_POPULATION_PROLIFERATION	GOBP_POSITIVE_REGULATION_OF_CELL_POPULATION_PROLIFERATION	410	-0.29316	-1.25684	0.0116749	0.17347	0.158281	1040	tags=21%, list=11%, signal=20%	TSPYL5/PPP1CC/CD320/IRS2/EDN1/HES1/TSPO/GNAI2/CIB1/NFATC2/FOSL2/GJC2/TGM2/CNOT6/PDCL3/SELENOK/SLC25A33/CDC42/HPN/NAP1L1/PHB/NOLC1/CCPG1/IGF1R/MARCKSL1/BRK1/DHX9/CNOT6L/CDKN1A/ZNF703/EDN2/PTPN22/AKR1B1/NME1/PDCD6/IRAK1/RAC2/LAMC1/TNFSF12/CTSH/PDGFC/FGF1/ADAM10/COX17/TGFBR2/VCAM1/RAB25/ETS1/EIF5A/ID2/E2F1/B4GALT1/SHC1/SLC25A5/CAPNS1/SERTAD1/RTKN2/EGFL7/MAZ/ID1/RPS3/PRDX3/CTNNB1/BAMBI/ADAMTS1/HMGB2/…
GOBP_ACTIN_FILAMENT_DEPOLYMERIZATION	GOBP_ACTIN_FILAMENT_DEPOLYMERIZATION	37	0.580758	1.56252	0.0117127	0.17347	0.158281	1804	tags=46%, list=19%, signal=38%	SPTBN1/LIMA1/ADD3/SPTAN1/VILL/GSN/CFL1/EPS8/PLEKHH2/VIL1/SCIN/ADD1/SWAP70/MICAL1/CARMIL1/F2RL1/SVIL
GOBP_REGULATION_OF_HISTONE_METHYLATION	GOBP_REGULATION_OF_HISTONE_METHYLATION	37	0.580805	1.56265	0.0117127	0.17347	0.158281	1579	tags=43%, list=16%, signal=36%	KMT2E/ATRX/BRD4/NSD3/OGT/KMT2A/IWS1/KDM3A/MLLT6/ZNF274/RIF1/SNW1/NELFE/SUPT6H/MTHFR/CTR9
GOCC_RUFFLE_MEMBRANE	GOCC_RUFFLE_MEMBRANE	60	0.517267	1.51211	0.0119028	0.175748	0.16036	1437	tags=35%, list=15%, signal=30%	TLN1/MYO6/EPS8L2/CLCN3/HIP1R/EZR/EPS8L3/MACF1/TESC/PAK1/DIAPH1/CFL1/EPS8/DNM2/PSD4/APC/PACSIN2/ITGB1/PLEKHA1/DDX58/SH3YL1
GOBP_STORE_OPERATED_CALCIUM_ENTRY	GOBP_STORE_OPERATED_CALCIUM_ENTRY	10	0.772006	1.64469	0.0119555	0.17599	0.16058	1	tags=10%, list=0%, signal=10%	SPINK1
GOCC_SUPRAMOLECULAR_POLYMER	GOCC_SUPRAMOLECULAR_POLYMER	416	-0.29775	-1.27757	0.0119948	0.176033	0.16062	614	tags=13%, list=6%, signal=13%	TUBA4A/NME1/DCTN3/DNAJB6/NEK7/TUBB3/RAC2/AMOT/SERP1/STUB1/FYN/TMOD3/CCT5/TBCB/ARF1/MAPRE1/TUBB/FKBP1A/FBXO32/TPT1/RPL15/ACTB/ATP2B4/KRT15/COL6A1/TUBA1C/TUBB4B/HSPH1/ELN/TUBA1A/PLS3/FLNA/PKP1/KRT4/NME2/LCP1/COL4A2/COL4A1/MMP2/ANXA1/KRT17/COL1A1/KRT5/COL1A2/FBLN1/KRT14/KRT81/KRT6A/VIM/COL3A1/LUM/KRT16/KRT13/DCN
GOBP_ORGANELLE_TRANSPORT_ALONG_MICROTUBULE	GOBP_ORGANELLE_TRANSPORT_ALONG_MICROTUBULE	54	0.53893	1.54302	0.0122229	0.178838	0.163179	1757	tags=37%, list=18%, signal=31%	SYNE2/TRAK1/FBXW11/BICD1/KIF5B/ARHGAP21/HIF1A/DYNC1H1/AP3D1/BICDL2/RAB6A/COPG1/KIF3B/PAFAH1B1/RAB1A/LRPPRC/MAP2/KIF3A/AP3B1/ARMCX3
GOBP_NADH_DEHYDROGENASE_COMPLEX_ASSEMBLY	GOBP_NADH_DEHYDROGENASE_COMPLEX_ASSEMBLY	51	-0.491477	-1.61317	0.0122659	0.178927	0.163261	1223	tags=45%, list=13%, signal=40%	DMAC1/NDUFA2/NDUFA9/TMEM126B/NDUFS3/NDUFS4/NDUFAF3/NDUFB6/NDUFA6/NDUFA11/NDUFA3/NDUFC2/MT-ND1/NDUFB4/MT-ND2/MT-ND3/NDUFA12/NDUFS5/NDUFB2/NDUFB3/NDUFAB1/NDUFS6/NDUFA1
GOBP_ATP_METABOLIC_PROCESS	GOBP_ATP_METABOLIC_PROCESS	207	-0.347965	-1.4034	0.0124215	0.180571	0.164761	1174	tags=30%, list=12%, signal=27%	NUP37/STOML2/COX7A2/NDUFS3/PARP1/BAD/EIF6/NDUFS4/CHCHD2/TSPO/ATP5PO/NUDT2/FOXK1/MT-CO2/VCP/NDUFB6/COX5A/SLC25A33/SDHA/ATP5F1A/ATP5MC2/NDUFA6/JMJD8/BID/PRXL2C/NDUFA11/ATP5F1D/NDUFA3/TPI1/COX7B/NDUFC2/MT-ND1/NDUFB4/MT-ND2/MT-ND3/NDUFA12/COX6A1/NDUFS5/ISCU/COA6/SDHC/CHCHD10/UQCRQ/GAPDH/UQCRFS1/NDUFB2/UQCR10/ATP5PF/ATP5MG/NDUFB3/ATP5F1E/PGAM1/MT-ATP6/NDUFAB1/NDUFS6/MT-CO3/NDUFA1/ATP5ME/MT-CYB/IGF1/HS…
GOBP_REGULATION_OF_CELLULAR_RESPONSE_TO_GROWTH_FACTOR_STIMULUS	GOBP_REGULATION_OF_CELLULAR_RESPONSE_TO_GROWTH_FACTOR_STIMULUS	133	-0.396522	-1.50237	0.0124616	0.180571	0.164761	637	tags=20%, list=7%, signal=19%	ZNF703/GIPC1/PDCD6/TGFB1I1/STUB1/FGF1/TGFBR2/FSTL3/STRAP/DOK5/ENG/SPART/TMEM204/ITGA5/ATP2B4/NIBAN2/BAMBI/RPS27A/CD109/NBL1/UBC/SFRP4/HSPA1A/THBS1/SFRP2/DCN
GOMF_SYMPORTER_ACTIVITY	GOMF_SYMPORTER_ACTIVITY	46	0.553433	1.54041	0.0125166	0.180571	0.164761	2242	tags=48%, list=23%, signal=37%	SLC4A4/SLC6A8/SLC22A18/SLC6A20/SLC38A1/SLC1A1/SLC6A14/SLC16A1/SLC12A7/SLC20A2/SLC16A4/SLC12A2/SLC15A1/SLC5A3/SLC16A7/SLC4A7/SLC28A3/SLC33A1/SLC11A2/MFSD4B/SLC5A1/SLC16A3
GOMF_FIBRONECTIN_BINDING	GOMF_FIBRONECTIN_BINDING	15	-0.697688	-1.78928	0.0125278	0.180571	0.164761	449	tags=47%, list=5%, signal=45%	FSTL3/CTSL/IGFBP3/THBS1/CCDC80/FBLN1/SFRP2
GOCC_VACUOLAR_MEMBRANE	GOCC_VACUOLAR_MEMBRANE	276	0.393232	1.36266	0.0126994	0.182503	0.166523	1930	tags=25%, list=20%, signal=21%	PIGR/SLC3A1/VMP1/CFTR/CP/CLTA/MYO6/AHNAK/CEACAM6/LDLR/CLCN3/PLD1/ATP6V0A1/VPS13A/CD164/VNN1/TM4SF5/OCLN/ATP10B/RB1CC1/CLTC/FNIP2/RPN2/GRN/NPC1/STX7/SPPL2B/AP3D1/HLA-DRB1/VPS35/RAB2A/IFITM3/CTSD/CYB561/AP1S3/FNIP1/HSP90AB1/CCZ1/TCIRG1/HLA-DRB5/AP2B1/LRP1/NSF/ATP11A/UBXN6/GAA/AP2A2/DNAJC13/TMEM106B/CD63/STOM/VTI1B/ATP6V1C1/ATG14/TMEM30A/YWHAB/RAB7A/TMEM63A/CLCN7/AP3B1/PSEN1/VPS41/PLEKHM1/LMBRD1/ANP…
GOMF_DYNEIN_LIGHT_INTERMEDIATE_CHAIN_BINDING	GOMF_DYNEIN_LIGHT_INTERMEDIATE_CHAIN_BINDING	15	0.692251	1.59539	0.0127898	0.183257	0.167211	1688	tags=60%, list=17%, signal=50%	HOOK2/CCDC88A/DYNC2H1/DYNC1H1/DYNLL2/HOOK1/DNAH14/HOOK3/DNAH5
GOMF_PHOSPHATIDYLINOSITOL_BINDING	GOMF_PHOSPHATIDYLINOSITOL_BINDING	148	0.439402	1.43735	0.0130751	0.186279	0.169969	2535	tags=35%, list=26%, signal=26%	TLN1/WDR45B/CCDC88A/PLD1/SESTD1/HIP1R/PLEKHA5/PIK3C2G/OGT/NUMA1/PLEKHA4/SNX9/OSBPL2/VILL/GSN/SDCBP2/EXOC1/PIK3C2A/IQGAP2/SYTL2/VIL1/SNX6/SCIN/ARHGAP32/PLEKHB2/PITPNM1/EPB41/EEA1/GRB7/GSDMD/SH3YL1/PICALM/SDCBP/KIF16B/KRIT1/APPL1/FCHO2/SVIL/ARFIP1/PARD3/ADAP1/MYO10/TECPR1/SNX14/GSDMB/CEACAM5/CERT1/ESYT1/SNX13/TWF1/ARAP3/GSDME
GOMF_LYSINE_ACETYLATED_HISTONE_BINDING	GOMF_LYSINE_ACETYLATED_HISTONE_BINDING	19	0.677392	1.62825	0.0130776	0.186279	0.169969	2364	tags=68%, list=24%, signal=52%	BRD4/ZMYND8/KMT2A/PHIP/BAZ2A/SMARCA4/PSME4/ATAD2B/BRD3/CARM1/BRD2/MLLT3/DPF2
GOMF_CYTOKINE_RECEPTOR_BINDING	GOMF_CYTOKINE_RECEPTOR_BINDING	109	0.464181	1.4656	0.0131736	0.186865	0.170503	679	tags=16%, list=7%, signal=15%	TFF2/CCL20/CXCL5/CXCL8/VEGFA/CXCL1/CXCL2/DEFB1/CXCL3/CCDC88A/CD2AP/CXCL6/JAK1/CFLAR/GRB2/IL18/LRG1
GOBP_POTASSIUM_ION_IMPORT_ACROSS_PLASMA_MEMBRANE	GOBP_POTASSIUM_ION_IMPORT_ACROSS_PLASMA_MEMBRANE	15	0.691544	1.59376	0.0132197	0.186865	0.170503	1345	tags=40%, list=14%, signal=35%	FXYD2/ATP1B1/ATP1A1/SLC12A7/SLC12A2/KCNJ15
GOCC_CILIUM	GOCC_CILIUM	258	0.396257	1.36533	0.0132345	0.186865	0.170503	2248	tags=30%, list=23%, signal=24%	ABHD2/ATP1B1/AHI1/STARD10/DEFB1/CCDC88A/SQSTM1/SLC9A3R1/VPS13A/EZR/APP/CSNK1D/BSG/SEPTIN9/USH1C/KIF5B/CCDC68/DYNC2H1/TRIP11/ATP1A1/HIF1A/SLC9B2/PRKAR1A/PRKACB/IFT172/MAP4/CEP290/RSPH3/RNF38/PCM1/PRKAR2A/PDE4C/CEP126/DYNLL2/KIF3B/IQCE/SPAG16/ARFGEF2/NAPEPLD/CFAP36/FHDC1/SORD/CEP164/PTK2/PAFAH1B1/INTU/CDK10/RAB10/DHRS3/DCTN1/CSNK1A1/DNAH14/ATG14/DAAM1/GSTM3/TOPORS/KIF3A/ARHGAP35/PSEN1/OFD1/TOGARAM1…
GOCC_VESICLE_MEMBRANE	GOCC_VESICLE_MEMBRANE	415	0.367612	1.30787	0.0132755	0.186898	0.170534	1684	tags=26%, list=17%, signal=22%	PIGR/RAB11FIP1/ANXA4/CYSTM1/AHNAK2/CFTR/CLTA/MYO6/EREG/CEACAM6/APLP2/CLINT1/TGOLN2/HBEGF/LDLR/CLCN3/SEC31A/PLD1/LGALS3/ATP6V0A1/HIP1R/VNN1/IYD/BSG/GPRC5B/ATP10B/CD59/LRIG3/CLIP1/SNX9/CLTC/ALDH3B1/KDELR1/NOSTRIN/TRIP11/HLA-E/ARHGAP21/GABRA2/AP1G2/HLA-B/GRB2/SLC9B2/DIAPH1/RAB27B/RAB5B/HLA-DRB1/PHACTR2/HLA-A/SYNRG/IGF2R/ARFGEF3/VPS13C/OLR1/IQGAP2/RAB6A/CYB561/COPG1/COPB1/TAP2/AP1S3/STX16/REEP6/AREG/…
GOBP_GOLGI_RIBBON_FORMATION	GOBP_GOLGI_RIBBON_FORMATION	12	0.741729	1.64406	0.0134346	0.188515	0.172008	1354	tags=58%, list=14%, signal=50%	GCC2/OPTN/TRIP11/GOLGA2/STX16/MYO18A/FHDC1
GOMF_UBIQUITIN_LIKE_PROTEIN_LIGASE_ACTIVITY	GOMF_UBIQUITIN_LIKE_PROTEIN_LIGASE_ACTIVITY	180	0.420304	1.40545	0.0134681	0.188515	0.172008	2748	tags=37%, list=28%, signal=27%	BIRC3/TRIM54/RNF19A/TRIM44/TRIM31/SH3RF1/RNF128/HECTD1/TRIM15/RNF103/UBR5/UBR2/XIAP/NFX1/TRIM27/NEDD4L/WWP1/SHPRH/TRIP12/RNF38/TRIM38/SMURF1/CBX4/PIAS1/RNF41/UBE2K/ARIH2/HERC2/CHFR/UFL1/CCNB1IP1/SH3RF2/TOPORS/TRIM4/TRIM25/MED1/PPP1R11/ITCH/TRIM14/PELI2/RNF139/ANKIB1/DTX3L/RNF8/TRIM2/TRIM5/TRIM26/TRIM73/TRAF3IP2/RNF183/DZIP3/UBE2O/LTN1/UBR4/ANAPC11/RNF145/UBE2D3/ZNF451/AMFR/RNF5/RFFL/SYVN1/SMURF2/…
GOBP_PROTEIN_TRANSPORT_ALONG_MICROTUBULE	GOBP_PROTEIN_TRANSPORT_ALONG_MICROTUBULE	35	0.582732	1.54112	0.0136467	0.189957	0.173324	1628	tags=40%, list=17%, signal=33%	KIF5B/DYNC2H1/TRIP11/RAB27B/IFT172/HNRNPU/MAPK8IP3/HSPB1/PCM1/SFPQ/DYNLL2/KIF3B/PURA/KIF3A
GOBP_RESPONSE_TO_MANGANESE_ION	GOBP_RESPONSE_TO_MANGANESE_ION	14	0.728491	1.64899	0.0136496	0.189957	0.173324	961	tags=29%, list=10%, signal=26%	ADAM9/SOD2/APP/HSPA5
GOBP_DEVELOPMENTAL_MATURATION	GOBP_DEVELOPMENTAL_MATURATION	113	0.460957	1.46726	0.0137246	0.190178	0.173526	1698	tags=24%, list=17%, signal=20%	SPINK1/ABHD2/CFTR/VEGFA/EREG/DEFB1/DDIT3/CLCN3/ZBTB7A/APP/HIF1A/ANG/YWHAZ/TUT4/AP3D1/TUT7/FARP2/PLXNB1/PICALM/CD63/RND1/ANKRD17/FZD5/LTF/NFIA/PPARG/RERE
GOBP_NEGATIVE_REGULATION_OF_PROTEIN_MATURATION	GOBP_NEGATIVE_REGULATION_OF_PROTEIN_MATURATION	12	-0.760824	-1.82375	0.013744	0.190178	0.173526	111	tags=33%, list=1%, signal=33%	CARD16/PRNP/THBS1/SERPINE1
GOBP_CELL_CELL_JUNCTION_ORGANIZATION	GOBP_CELL_CELL_JUNCTION_ORGANIZATION	119	0.459546	1.47448	0.013836	0.190548	0.173864	1723	tags=39%, list=18%, signal=33%	CLDN18/TLN1/VEGFA/CLDN10/CTNND1/AFDN/TJP2/PATJ/CDH1/OCLN/PKP2/NUMB/PKN2/MTDH/PRKCA/CTNNA1/PKP3/JUP/ANG/PRKCI/ACTG1/ROCK1/MICALL2/PDCD6IP/PARD6B/ACE/CLDN23/EXT1/GJB1/PERP/SMAD3/CLDN2/PLEKHA7/APC/MPP5/MARVELD3/CDH6/ADD1/IKBKB/PVR/NECTIN3/FZD5/GRHL2/F2RL1/TJP3/DSG2/TGFBR1
GOMF_DNA_BINDING_TRANSCRIPTION_FACTOR_BINDING	GOMF_DNA_BINDING_TRANSCRIPTION_FACTOR_BINDING	251	0.398305	1.36718	0.0138495	0.190548	0.173864	2259	tags=32%, list=23%, signal=25%	ANXA4/NCOA7/DDIT3/STAT3/SOX9/JMJD1C/TACC1/ZBTB7A/ZMYND8/TAF7/GATA6/TCF7L2/MTDH/BHLHE41/JUN/TMF1/KLF5/HIPK2/BAZ2A/HIF1A/FOXP1/SMARCA4/JUP/KDM3A/GSK3B/HNF4A/MED13/SPEN/NFKBIA/TRIP12/TLE4/HSPB1/THRAP3/ZFPM1/TACC2/BRMS1/FHL2/SMAD3/NCOA2/MED16/NFE2L2/BHLHE40/PIAS1/PRPF6/BCL10/LRIF1/DDX5/TLE5/NRIP1/KLF4/HMGN3/HDAC2/SNW1/PPID/CALR/NR1I2/SRI/MED1/PPARG/RERE/WBP2/EP300/ATF2/CHD4/NR0B2/DTX3L/TLE1/HDAC9/PKN…
GOBP_PERIPHERAL_NERVOUS_SYSTEM_DEVELOPMENT	GOBP_PERIPHERAL_NERVOUS_SYSTEM_DEVELOPMENT	37	0.573632	1.54335	0.0140749	0.192587	0.175724	1979	tags=41%, list=20%, signal=32%	ONECUT2/ERBB3/NDRG1/ADGRG6/ALDH3A2/NF1/DICER1/MPP5/FA2H/SLC5A3/GSTM3/PARD3/ITGB4/SOD1/CLDN1
GOBP_SKELETAL_SYSTEM_MORPHOGENESIS	GOBP_SKELETAL_SYSTEM_MORPHOGENESIS	90	-0.428432	-1.53048	0.0140772	0.192587	0.175724	520	tags=12%, list=5%, signal=12%	ARID5B/BMP7/TGFBR2/HOXB2/CTNNB1/SERPINH1/SFRP4/MMP2/COL1A1/SFRP2/MGP
GOCC_MYOSIN_COMPLEX	GOCC_MYOSIN_COMPLEX	22	0.664998	1.64028	0.0141941	0.193639	0.176684	1299	tags=41%, list=13%, signal=36%	MYO6/MYL6/CGN/MYH14/MYO9A/MYO18A/MYO7B/DYNLL2/MYH9
GOMF_MICROTUBULE_PLUS_END_BINDING	GOMF_MICROTUBULE_PLUS_END_BINDING	15	0.687763	1.58504	0.0142944	0.19446	0.177434	1539	tags=53%, list=16%, signal=45%	DST/FBXW11/NUMA1/CLIP1/CLIP2/APC/PAFAH1B1/DCTN1
GOBP_REGULATION_OF_TRANSCRIPTION_ELONGATION_FROM_RNA_POLYMERASE_II_PROMOTER	GOBP_REGULATION_OF_TRANSCRIPTION_ELONGATION_FROM_RNA_POLYMERASE_II_PROMOTER	26	0.624284	1.58108	0.0144682	0.196274	0.179088	2222	tags=54%, list=23%, signal=42%	BRD4/CDK12/HEXIM1/GTF2F1/HNRNPU/SUPT4H1/WDR43/NELFE/SUPT6H/CDK13/LARP7/RNF8/ZMYND11/TCERG1
GOBP_DETECTION_OF_CHEMICAL_STIMULUS	GOBP_DETECTION_OF_CHEMICAL_STIMULUS	12	0.735383	1.63	0.0145094	0.196282	0.179095	699	tags=25%, list=7%, signal=23%	PIGR/AZGP1/CASR
GOBP_REGULATION_OF_EPITHELIAL_TO_MESENCHYMAL_TRANSITION	GOBP_REGULATION_OF_EPITHELIAL_TO_MESENCHYMAL_TRANSITION	49	-0.482153	-1.57381	0.0146436	0.197546	0.180249	957	tags=35%, list=10%, signal=31%	SMAD2/PHLDB1/SPRY1/DAB2/HPN/ZNF703/MCRIP1/TGFB1I1/BMP7/TGFBR2/ADIPOR1/STRAP/ENG/CTNNB1/BAMBI/COL1A1/SFRP2
GOCC_9PLUS2_MOTILE_CILIUM	GOCC_9PLUS2_MOTILE_CILIUM	38	0.566436	1.5289	0.0149015	0.20046	0.182908	2248	tags=47%, list=23%, signal=37%	ABHD2/ATP1B1/DEFB1/SQSTM1/SLC9A3R1/VPS13A/ATP1A1/SLC9B2/PRKAR1A/IFT172/RNF38/SPAG16/GSTM3/DNAH5/DDX6/DNAJB13/MNS1/CFAP70
GOCC_ADHERENS_JUNCTION	GOCC_ADHERENS_JUNCTION	105	0.463703	1.45994	0.0149424	0.20046	0.182908	1557	tags=38%, list=16%, signal=32%	TLN1/NDRG1/SHROOM3/VEGFA/PTPRK/AHI1/CTNND1/AFDN/TJP2/CDH1/PKP2/BAIAP2L1/CTNNA1/TMEM47/VEZT/PKP3/JUP/KRT18/CDC42EP4/EIF4G2/JAG1/MAGI1/PDLIM5/PLEKHA7/APC/SHROOM1/MPP5/CDH6/ADD1/MYH9/CYTH1/FMN1/FRMD4B/PVR/NECTIN3/RAB10/SDCBP/RND1/ABI2/PPP1CA
GOCC_ACTIN_BASED_CELL_PROJECTION	GOCC_ACTIN_BASED_CELL_PROJECTION	115	0.460862	1.47135	0.0151421	0.202578	0.18484	1009	tags=23%, list=10%, signal=21%	SYNE2/CDHR2/CA2/MYO6/FGD4/STARD10/S100P/EPS8L2/SLC9A3R1/PLS1/EZR/APP/CDHR5/USH1C/ATP8B1/RAPH1/VEZT/UTRN/PPP1R9A/SHTN1/PTPRH/IQGAP2/EPS8/MYO7B/ABI1/VIL1
GOBP_HISTONE_H3_K36_METHYLATION	GOBP_HISTONE_H3_K36_METHYLATION	10	0.757124	1.61298	0.015246	0.203405	0.185595	1073	tags=60%, list=11%, signal=53%	BRD4/NSD3/IWS1/SETD2/SETD5/ASH1L
GOBP_ENDOPLASMIC_RETICULUM_UNFOLDED_PROTEIN_RESPONSE	GOBP_ENDOPLASMIC_RETICULUM_UNFOLDED_PROTEIN_RESPONSE	99	0.468032	1.46883	0.0154035	0.204101	0.18623	2711	tags=45%, list=28%, signal=33%	TLN1/ERO1A/CXCL8/CREB3/AGR2/DDIT3/SEC31A/HSP90B1/GFPT1/PPP1R15A/ERN2/ATF6B/CUL7/XBP1/HSPA5/CREBRF/NFE2L2/ADD1/CREB3L1/DERL1/DCTN1/UFL1/CALR/EP300/TMEM33/ATF3/PPP1R15B/MBTPS1/DNAJC3/SELENOS/HYOU1/KLHDC3/PDIA5/GET3/FKBP14/PDIA6/EIF2AK3/CANX/IGFBP1/EDEM1/AMFR/ATP6V0D1/GOSR2/SYVN1/CDK5RAP3
GOBP_CELL_ACTIVATION_INVOLVED_IN_IMMUNE_RESPONSE	GOBP_CELL_ACTIVATION_INVOLVED_IN_IMMUNE_RESPONSE	400	0.370744	1.31658	0.0155178	0.204101	0.18623	1889	tags=28%, list=19%, signal=24%	SERPINA3/SERPINA1/OLFM4/PIGR/LYZ/TCIM/CYSTM1/NFKBIZ/LCN2/PA2G4/ST3GAL1/CXCL1/PRSS2/CEACAM6/TCN1/S100P/STAT3/PLD1/RNASET2/LGALS3/ATP6V0A1/VNN1/APP/CD59/PDAP1/ALDH3B1/GRN/SPTAN1/PLAC8/FOXP1/AOC1/HLA-B/IL18/JUP/DYNC1H1/SERPINB3/LRG1/DIAPH1/ROCK1/FUCA2/GSN/FRK/RAB5B/HLA-DRB1/ZC3H12A/IGF2R/CTSD/MVP/OLR1/IQGAP2/RAB6A/CEP290/COPB1/XBP1/HSP90AB1/NBEAL2/PCK1/ZFPM1/TCIRG1/UNC13D/PSMD7/LRP1/IST1/PRSS3/ATP11…
GOBP_METAL_ION_EXPORT	GOBP_METAL_ION_EXPORT	20	0.64276	1.54932	0.0155753	0.204101	0.18623	928	tags=35%, list=10%, signal=32%	SLC40A1/FXYD2/ATP1B1/SLC4A4/KCNE3/ATP1A1/ATP7B
GOBP_INTERMEDIATE_FILAMENT_ORGANIZATION	GOBP_INTERMEDIATE_FILAMENT_ORGANIZATION	11	-0.780438	-1.8458	0.0155769	0.204101	0.18623	151	tags=45%, list=2%, signal=45%	DNAJB6/PKP1/KRT17/KRT14/VIM
GOBP_SENSORY_PERCEPTION_OF_LIGHT_STIMULUS	GOBP_SENSORY_PERCEPTION_OF_LIGHT_STIMULUS	66	-0.468178	-1.62392	0.0155809	0.204101	0.18623	798	tags=14%, list=8%, signal=13%	WFS1/LAMB2/OAT/PPT1/TGFBI/EFEMP1/TIMP3/COL1A1/LUM
GOCC_TIGHT_JUNCTION	GOCC_TIGHT_JUNCTION	82	0.480315	1.46505	0.0156153	0.204101	0.18623	2175	tags=49%, list=22%, signal=38%	CLDN18/CLDN10/AFDN/TJP2/PATJ/CGN/OCLN/USP53/MTDH/AOC1/PRKCI/MICALL2/MAGI1/MAGI3/ANK3/PDCD6IP/PARD6B/CLDN23/CLDN12/ASH1L/CLDN2/APC/MPP5/NHS/MARVELD3/CYTH1/FRMD4B/DDX58/FZD5/EPPK1/TJP3/TGFBR1/SYMPK/POF1B/PARD3/TJAP1/CLDN1/CLDN15/DLG1/MARVELD2
GOBP_NEGATIVE_REGULATION_OF_ERBB_SIGNALING_PATHWAY	GOBP_NEGATIVE_REGULATION_OF_ERBB_SIGNALING_PATHWAY	42	0.561102	1.53721	0.0156589	0.204101	0.18623	1739	tags=36%, list=18%, signal=29%	EREG/HBEGF/ERRFI1/GRB2/PTPN12/MVP/AREG/SNX6/HGS/RAB7A/DUSP3/PSEN1/SOCS4/PTPN3/EPN1
GOMF_SULFOTRANSFERASE_ACTIVITY	GOMF_SULFOTRANSFERASE_ACTIVITY	17	0.679279	1.59828	0.015664	0.204101	0.18623	914	tags=24%, list=9%, signal=21%	SULT1C2/HS3ST1/SULT1B1/SULT1E1
GOBP_REGULATION_OF_MICROTUBULE_BASED_PROCESS	GOBP_REGULATION_OF_MICROTUBULE_BASED_PROCESS	121	0.449078	1.44062	0.0156774	0.204101	0.18623	2112	tags=35%, list=22%, signal=28%	TRIM54/AKAP9/GBA2/DEFB1/OCLN/BICD1/CHMP2B/CHMP4C/NUMA1/CLIP1/MACF1/CLTC/BMERB1/TAOK1/SENP6/PAK1/DYNC1H1/DIAPH1/ROCK1/GSK3B/PDCD6IP/HNRNPU/RASSF7/APC/MAP9/KAT2A/MARK2/CKAP5/PRKAA1/TPR/DCTN1/MAP2/SPICE1/TOGARAM1/HSPA1B/ATF5/CDK5RAP2/EFNA5/PKHD1/STK11/PRKAA2/CEP295
GOCC_NBAF_COMPLEX	GOCC_NBAF_COMPLEX	11	0.741263	1.61558	0.0157425	0.204399	0.186502	662	tags=36%, list=7%, signal=34%	SMARCC2/ARID1B/SMARCA4/SMARCC1
GOMF_SERINE_TYPE_ENDOPEPTIDASE_INHIBITOR_ACTIVITY	GOMF_SERINE_TYPE_ENDOPEPTIDASE_INHIBITOR_ACTIVITY	32	0.584052	1.53198	0.0158064	0.204574	0.186661	315	tags=25%, list=3%, signal=24%	SPINK1/SERPINA3/SERPINA1/TFPI/PI3/SERPINA4/APLP2/APP
GOBP_CYTOPLASMIC_MICROTUBULE_ORGANIZATION	GOBP_CYTOPLASMIC_MICROTUBULE_ORGANIZATION	42	0.560171	1.53466	0.0158584	0.204574	0.186661	1553	tags=36%, list=16%, signal=30%	DST/HOOK2/CCDC88A/EZR/NUMA1/CLIP1/DYNC1H1/IFT172/PCM1/DVL1/CLIP2/CEP126/HOOK1/DCTN1/HOOK3
GOBP_PROSTANOID_BIOSYNTHETIC_PROCESS	GOBP_PROSTANOID_BIOSYNTHETIC_PROCESS	16	-0.678277	-1.7554	0.0159507	0.204574	0.186661	618	tags=44%, list=6%, signal=41%	EDN1/EDN2/PTGIS/PTGES/PTGDS/ANXA1/FABP5
GOCC_RECEPTOR_COMPLEX	GOCC_RECEPTOR_COMPLEX	138	0.433618	1.40358	0.0159593	0.204574	0.186661	2016	tags=29%, list=21%, signal=23%	PIGR/ERBB3/GABRP/ITGB8/ITGA2/ITGB6/LDLR/AHR/APP/GPRC5B/RAMP1/GABRA2/NBR1/LMTK2/FGFR4/OLR1/PLA2R1/HSP90AB1/GABRE/SMAD3/LRP1/CAPRIN2/GPR160/PLXNB1/IKBKB/ITGB1/SYK/TFRC/ACVR1B/SDCBP/PPARG/TGFBR1/ROS1/ITGB4/TAOK2/SYNJ2BP/GPRC5C/INSR/CD44/IL4R
GOCC_NEURON_PROJECTION_CYTOPLASM	GOCC_NEURON_PROJECTION_CYTOPLASM	55	0.526059	1.51125	0.0159672	0.204574	0.186661	1914	tags=38%, list=20%, signal=31%	DST/TRAK1/HIP1R/FBXW11/KIF5B/HIF1A/DYNC1H1/RAB27B/AP3D1/HNRNPU/MAPK8IP3/HSPB1/SFPQ/KIF3B/PAFAH1B1/MAP2/PURA/KIF3A/AP3B1/ARMCX3/SOD1
GOBP_NUCLEOSIDE_TRIPHOSPHATE_METABOLIC_PROCESS	GOBP_NUCLEOSIDE_TRIPHOSPHATE_METABOLIC_PROCESS	71	-0.441238	-1.53986	0.0160314	0.204855	0.186918	1643	tags=42%, list=17%, signal=35%	MT-ATP8/NME7/ATP5MC3/DGUOK/PINK1/RHOQ/AK1/NUDT15/STOML2/PARP1/NUDT1/ATP5PO/NUDT2/MT-CO2/VCP/ATP5F1A/ATP5MC2/ATP5F1D/NME1/ITPA/IMPDH2/NME3/RAN/ATP5PF/ATP5MG/ATP5F1E/MT-ATP6/ATP5ME/NME2/TMSB4X
GOBP_UNSATURATED_FATTY_ACID_BIOSYNTHETIC_PROCESS	GOBP_UNSATURATED_FATTY_ACID_BIOSYNTHETIC_PROCESS	26	-0.60395	-1.71327	0.0162233	0.205938	0.187906	990	tags=38%, list=10%, signal=35%	EDN1/SCD/ELOVL5/EDN2/DEGS1/PTGIS/PTGES/PTGDS/ANXA1/FABP5
GOCC_CENTROSOME	GOCC_CENTROSOME	371	0.373681	1.32162	0.0162234	0.205938	0.187906	2048	tags=28%, list=21%, signal=23%	NDRG1/AKAP9/AHI1/TAF1D/HOOK2/CCDC88A/ITGB6/RNF19A/WAPL/PATJ/CD2AP/CSNK1D/BOD1L1/TESK1/FBXW11/BICD1/RBM39/DYNC1I2/PKN2/NUMA1/CLIP1/KIF5B/FNIP2/CSPP1/ITSN2/CEP57/DYNC1LI2/DYNC1H1/MISP/HK2/EXOC7/KRT18/SPPL2B/GSK3B/PRKAR1A/PRKACB/SLC16A1/MARCKS/HNRNPU/CEP290/CUL7/TTC39A/RASSF7/DNM2/PCM1/PCNT/PLAG1/PRKAR2A/MIB1/IL17RB/CAPRIN2/CEP126/PLEKHA7/APC/DYNLL2/KIF3B/IST1/NFE2L2/PPP4R2/LRIF1/CCDC57/HOOK1/KAT2A/…
GOBP_NEUROTRANSMITTER_RECEPTOR_TRANSPORT	GOBP_NEUROTRANSMITTER_RECEPTOR_TRANSPORT	23	0.630802	1.56727	0.0162437	0.205938	0.187906	1155	tags=39%, list=12%, signal=35%	NUMB/KIF5B/SLC1A1/AP3D1/MX1/VPS35/DNM2/AP2B1/GRIPAP1
GOBP_POSITIVE_REGULATION_OF_MULTICELLULAR_ORGANISM_GROWTH	GOBP_POSITIVE_REGULATION_OF_MULTICELLULAR_ORGANISM_GROWTH	10	0.756478	1.61161	0.0163428	0.206115	0.188067	1009	tags=50%, list=10%, signal=45%	PLS1/EZR/CHD7/NIPBL/VIL1
GOMF_PROTEIN_KINASE_A_CATALYTIC_SUBUNIT_BINDING	GOMF_PROTEIN_KINASE_A_CATALYTIC_SUBUNIT_BINDING	10	0.756398	1.61144	0.0163428	0.206115	0.188067	1315	tags=60%, list=14%, signal=52%	SOX9/EZR/GSK3B/PRKAR1A/PRKAR2A/PJA2
GOCC_ANCHORING_JUNCTION	GOCC_ANCHORING_JUNCTION	492	0.357783	1.28873	0.016393	0.206212	0.188156	1759	tags=32%, list=18%, signal=28%	CLDN18/ADAM9/TLN1/NDRG1/SYNE2/DST/ATP1B1/SHROOM3/VEGFA/PTPRK/LIMA1/KRT8/AHI1/SAV1/ITGB8/STARD10/CLDN10/AHNAK/ITGA2/CTNND1/ITGB6/SDC4/AFDN/TJP2/PATJ/ADD3/CDH1/CD2AP/EZR/PNN/APP/CGN/OCLN/MAP4K4/USP53/PLEC/PKP2/BSG/JAK1/HSP90B1/NUMB/CD59/P4HB/PKN2/MTDH/LPP/BAIAP2L1/CAPN5/CLTC/RPS13/ATP1A1/ERBIN/CTNNA1/TMEM47/VEZT/RRAS/PKP3/AOC1/PABPC1/GRB2/CORO1B/JUP/PAK1/MISP/LMO7/GAK/MAPK3/PRKCI/FGFR4/KRT18/ACTG1/…
GOBP_AMEBOIDAL_TYPE_CELL_MIGRATION	GOBP_AMEBOIDAL_TYPE_CELL_MIGRATION	221	-0.340442	-1.38881	0.0164825	0.2068	0.188692	628	tags=15%, list=6%, signal=14%	GIPC1/PDCD6/HAS1/TNFSF12/AMOT/CTSH/ARID5B/FGF1/BMP7/TGFBR2/CAP1/EPHA2/ADIPOR1/RAB25/STRAP/ETS1/LAMA5/PFN1/C1QBP/ATP2B4/ID1/RAB13/NR4A1/ARHGDIB/FN1/TIMP1/SERPINF1/ANXA1/TMSB4X/THBS1/SPARC/KRT16/DCN
GOMF_PEPTIDE_HORMONE_BINDING	GOMF_PEPTIDE_HORMONE_BINDING	11	0.736971	1.60623	0.016611	0.207625	0.189445	454	tags=27%, list=5%, signal=26%	SLC40A1/SCTR/RAMP1
GOCC_AXON_CYTOPLASM	GOCC_AXON_CYTOPLASM	37	0.565309	1.52096	0.016634	0.207625	0.189445	1914	tags=43%, list=20%, signal=35%	DST/TRAK1/FBXW11/KIF5B/HIF1A/DYNC1H1/RAB27B/AP3D1/MAPK8IP3/HSPB1/KIF3B/PAFAH1B1/KIF3A/AP3B1/ARMCX3/SOD1
GOMF_GUANYL_NUCLEOTIDE_EXCHANGE_FACTOR_ACTIVITY	GOMF_GUANYL_NUCLEOTIDE_EXCHANGE_FACTOR_ACTIVITY	116	0.444528	1.42186	0.0166932	0.207828	0.189631	2908	tags=42%, list=30%, signal=30%	FGD4/RGP1/ARHGEF12/CCDC88A/EPS8L2/ARHGEF5/ARFGEF1/AKAP13/FGD6/RALGPS2/ITSN2/ARFGEF3/SH2D3A/FNIP1/CCZ1/PSD4/FARP2/DENND2D/ARFGEF2/CYTH1/DOCK6/ARHGEF40/HERC2/KALRN/RGL3/SBF2/RAPGEF5/DOCK1/VAV2/ARHGEF16/TRIO/EIF2B4/NUCB2/ARHGEF10/RAB3IP/RAPGEF2/RASGRP3/DIS3/ALS2/DENND11/CCDC88C/RAPGEF4/SPATA13/LAMTOR1/DENND3/DENND6A/LAMTOR3/HPS4/RAB3GAP1
GOCC_CORTICAL_CYTOSKELETON	GOCC_CORTICAL_CYTOSKELETON	56	0.529283	1.52885	0.0167829	0.208299	0.19006	1980	tags=50%, list=20%, signal=40%	SPTBN1/SHROOM3/LLGL2/CDH1/PLS1/EZR/AKAP13/NUMA1/SNX9/SPTAN1/UTRN/MISP/PPP1R9A/GSN/EPB41L2/MLPH/PLEKHH2/LASP1/SHROOM1/EPB41/PCLO/MYH9/RTKN/ACTR2/DCDC2/CTTN/MAEA/ERC1
GOCC_COATED_VESICLE_MEMBRANE	GOCC_COATED_VESICLE_MEMBRANE	106	0.460976	1.44993	0.016817	0.208299	0.19006	1739	tags=36%, list=18%, signal=30%	CFTR/CLTA/MYO6/EREG/CLINT1/TGOLN2/HBEGF/LDLR/SEC31A/HIP1R/CD59/CLTC/KDELR1/HLA-E/AP1G2/HLA-B/HLA-DRB1/HLA-A/SYNRG/IGF2R/COPG1/COPB1/REEP6/AREG/HLA-DRB5/AP2B1/CEMIP/AFTPH/AP2A2/RAB5A/TFRC/PICALM/VTI1B/FZD5/EPN2/AP3B1/USO1/EPN1
GOBP_REGULATION_OF_PROTEIN_LOCALIZATION_TO_PLASMA_MEMBRANE	GOBP_REGULATION_OF_PROTEIN_LOCALIZATION_TO_PLASMA_MEMBRANE	59	0.511458	1.49218	0.0170183	0.210254	0.191844	2167	tags=42%, list=22%, signal=33%	SPTBN1/AGR2/SQSTM1/LGALS3/PLS1/EZR/NUMB/KIF5B/CLTC/STX7/PRKCI/VIL1/LRP1/GRIPAP1/LYPLA1/ITGB1/PICALM/PDPK1/APPL1/VTI1B/RAB11FIP2/PPFIA1/GOPC/DLG1/ARHGEF16
GOBP_NEUTRAL_AMINO_ACID_TRANSPORT	GOBP_NEUTRAL_AMINO_ACID_TRANSPORT	23	0.628524	1.56161	0.0170714	0.210373	0.191953	1513	tags=35%, list=16%, signal=29%	SLC3A1/LLGL2/SLC6A20/SLC38A1/SLC1A1/SLC6A14/SLC38A5/SLC43A1
GOBP_APICAL_JUNCTION_ASSEMBLY	GOBP_APICAL_JUNCTION_ASSEMBLY	57	0.524682	1.51627	0.0171506	0.210813	0.192354	2175	tags=49%, list=22%, signal=38%	CLDN18/CLDN10/AFDN/PATJ/OCLN/PKN2/MTDH/CTNNA1/PRKCI/ROCK1/MICALL2/PDCD6IP/PARD6B/CLDN23/CLDN2/APC/MPP5/MARVELD3/IKBKB/FZD5/GRHL2/POF1B/PARD3/CLDN1/SRF/CLDN15/DLG1/MARVELD2
GOBP_REGULATION_OF_HORMONE_LEVELS	GOBP_REGULATION_OF_HORMONE_LEVELS	232	0.39561	1.35048	0.0173026	0.212143	0.193567	1568	tags=26%, list=16%, signal=22%	DUOX2/RAB11FIP1/CYP3A5/CFTR/DUOXA2/SRD5A3/SOX4/SPP1/FAM3D/ALDH1A1/HSD17B2/IYD/CHD7/BACE2/TCF7L2/PRKCA/KIF5B/CYP2S1/AIMP1/TMF1/ATP1A1/AKR1B10/HIF1A/TIPARP/PCSK5/HSD17B11/C1QTNF12/RDH11/CCDC186/CASR/CYP2C18/SLC9B2/HNF1B/HLA-DRB1/HNF4A/SULT1B1/SLC16A1/HSD17B12/MIDN/SULT1E1/ACE/TCIRG1/ADH1C/PNPLA2/MPC2/LRP1/REST/PCLO/MCU/FKBP1B/FOXA2/HMGN3/AKR1C3/CPQ/PLEKHA1/GNAS/DHRS3/RAB1A/ICA1/KALRN
GOBP_POSITIVE_REGULATION_OF_TRANSCRIPTION_FROM_RNA_POLYMERASE_II_PROMOTER_INVOLVED_IN_CELLULAR_RESPONSE_TO_CHEMICAL_STIMULUS	GOBP_POSITIVE_REGULATION_OF_TRANSCRIPTION_FROM_RNA_POLYMERASE_II_PROMOTER_INVOLVED_IN_CELLULAR_RESPONSE_TO_CHEMICAL_STIMULUS	16	0.693105	1.61725	0.0173937	0.212473	0.193869	1793	tags=50%, list=18%, signal=41%	CREB3/VEGFA/HIF1A/XBP1/NFE2L2/SMAD5/EP300/CHD6
GOMF_AMINO_ACID_TRANSMEMBRANE_TRANSPORTER_ACTIVITY	GOMF_AMINO_ACID_TRANSMEMBRANE_TRANSPORTER_ACTIVITY	36	0.561833	1.49148	0.0174173	0.212473	0.193869	1972	tags=31%, list=20%, signal=24%	SLC3A1/SLC9A3R1/SLC6A20/SLC38A1/SLC1A1/SLC6A14/SLC7A11/SLC38A5/SLC43A1/SLC38A10/SLC25A13
GOCC_DYNEIN_COMPLEX	GOCC_DYNEIN_COMPLEX	24	0.636722	1.59538	0.0174746	0.212637	0.194019	3001	tags=71%, list=31%, signal=49%	DYNC1I2/DYNC2H1/DYNC1LI2/DYNC1H1/DYNLL2/NUDCD3/TPR/DCTN1/DNAH14/TOPORS/DNAH5/DCTN2/CFAP70/DYNC1LI1/HDAC6/DYNLT1/DYNC2LI1
GOBP_NEGATIVE_REGULATION_OF_STEM_CELL_DIFFERENTIATION	GOBP_NEGATIVE_REGULATION_OF_STEM_CELL_DIFFERENTIATION	13	0.71528	1.59722	0.0175439	0.212945	0.1943	1599	tags=62%, list=16%, signal=51%	CDK12/N4BP2L2/JAG1/HNRNPU/REST/NFE2L2/OCIAD1/CDK13
GOMF_CALCIUM_DEPENDENT_PROTEIN_BINDING	GOMF_CALCIUM_DEPENDENT_PROTEIN_BINDING	36	-0.549677	-1.71113	0.0176751	0.214001	0.195263	681	tags=33%, list=7%, signal=31%	S100A14/PLSCR3/PDCD6/VAMP2/ATP2B4/S100A4/S100A10/SYT8/A2M/S100A11/ANXA1/S100A13
GOBP_MULTI_MULTICELLULAR_ORGANISM_PROCESS	GOBP_MULTI_MULTICELLULAR_ORGANISM_PROCESS	88	-0.414464	-1.47206	0.0178694	0.215385	0.196526	650	tags=22%, list=7%, signal=20%	GJB2/AKR1B1/TGFBR2/ETS1/PITHD1/RGS2/B4GALT1/MAGED2/C1QBP/ITGA5/MMP7/PRDX3/CAPN2/UCP2/EPYC/ARHGDIB/TIMP1/MMP2/IGFBP7
GOBP_MICROTUBULE_ANCHORING_AT_MICROTUBULE_ORGANIZING_CENTER	GOBP_MICROTUBULE_ANCHORING_AT_MICROTUBULE_ORGANIZING_CENTER	10	0.748858	1.59537	0.0178783	0.215385	0.196526	1628	tags=70%, list=17%, signal=58%	BICD1/CCDC68/GSK3B/PCM1/DCTN1/HOOK3/KIF3A
GOMF_RNA_POLYMERASE_II_SPECIFIC_DNA_BINDING_TRANSCRIPTION_FACTOR_BINDING	GOMF_RNA_POLYMERASE_II_SPECIFIC_DNA_BINDING_TRANSCRIPTION_FACTOR_BINDING	190	0.412441	1.38342	0.0179801	0.216073	0.197154	2243	tags=34%, list=23%, signal=26%	ANXA4/NCOA7/STAT3/JMJD1C/TACC1/ZBTB7A/TAF7/GATA6/TCF7L2/MTDH/BHLHE41/JUN/TMF1/HIPK2/BAZ2A/HIF1A/FOXP1/SMARCA4/JUP/KDM3A/GSK3B/HNF4A/MED13/NFKBIA/TRIP12/HSPB1/THRAP3/ZFPM1/TACC2/BRMS1/SMAD3/NCOA2/MED16/NFE2L2/BHLHE40/PRPF6/BCL10/LRIF1/DDX5/NRIP1/KLF4/HMGN3/HDAC2/SNW1/PPID/CALR/NR1I2/MED1/PPARG/WBP2/EP300/ATF2/CHD4/NR0B2/DTX3L/PKN1/NCOR1/SRF/LATS1/SLC30A9/TCERG1/NCOA1/NCOA3/CREB1
GOBP_ENDOTHELIAL_CELL_MIGRATION	GOBP_ENDOTHELIAL_CELL_MIGRATION	109	-0.395967	-1.47811	0.0182252	0.218477	0.199347	628	tags=16%, list=6%, signal=15%	GIPC1/PDCD6/TNFSF12/AMOT/FGF1/EPHA2/ETS1/ATP2B4/ID1/RAB13/NR4A1/SERPINF1/ANXA1/TMSB4X/THBS1/SPARC/DCN
GOBP_NEGATIVE_REGULATION_OF_CELL_MATRIX_ADHESION	GOBP_NEGATIVE_REGULATION_OF_CELL_MATRIX_ADHESION	20	-0.641475	-1.70286	0.0184833	0.221	0.20165	220	tags=25%, list=2%, signal=24%	ADAM15/APOD/CDKN2A/THBS1/SERPINE1
GOMF_NUCLEOSIDE_TRIPHOSPHATASE_REGULATOR_ACTIVITY	GOMF_NUCLEOSIDE_TRIPHOSPHATASE_REGULATOR_ACTIVITY	305	0.380164	1.32448	0.018527	0.221	0.20165	2832	tags=37%, list=29%, signal=27%	FXYD2/ATP1B1/FGD4/RGP1/ARHGEF12/LLGL2/CCDC88A/DNAJC10/RGS5/EPS8L2/FAM13A/ARHGEF5/ARHGAP12/ALDH1A1/ARFGEF1/RALGAPA2/ARHGAP18/AKAP13/FGD6/JUN/FNIP2/ERRFI1/RALGPS2/ITSN2/ARHGAP21/SIL1/ARHGDIA/ARHGAP26/ARFGEF3/RGS12/IPO7/IQGAP2/AGFG1/SH2D3A/MYO9A/FNIP1/CCZ1/ARHGAP29/PSD4/FARP2/RALGAPA1/NF1/ARHGAP5/ARHGAP32/EVI5/ARFGAP3/RUNDC1/DENND2D/PLXNB1/ARFGEF2/CYTH1/DOCK6/GPS1/ARHGEF40/RTKN/HERC2/KRIT1/EIF5/KALR…
GOBP_REGULATION_OF_SIGNALING_RECEPTOR_ACTIVITY	GOBP_REGULATION_OF_SIGNALING_RECEPTOR_ACTIVITY	73	-0.448824	-1.57963	0.0186092	0.221436	0.202047	417	tags=10%, list=4%, signal=9%	LY6H/ARC/SHC1/MUC4/LY6E/SERPINE1/MTRNR2L12
GOBP_PHOTORECEPTOR_CELL_DEVELOPMENT	GOBP_PHOTORECEPTOR_CELL_DEVELOPMENT	16	0.688908	1.60746	0.0188876	0.224198	0.204567	1622	tags=44%, list=17%, signal=37%	VEGFA/AHI1/USH1C/PRKCI/CEP290/THRB/TOPORS
GOBP_MICROTUBULE_ANCHORING	GOBP_MICROTUBULE_ANCHORING	19	0.669891	1.61022	0.0191455	0.226458	0.206629	1628	tags=47%, list=17%, signal=40%	GCC2/BICD1/CCDC68/CEP57/GSK3B/PCM1/DCTN1/HOOK3/KIF3A
GOBP_NEGATIVE_REGULATION_OF_OSTEOCLAST_DIFFERENTIATION	GOBP_NEGATIVE_REGULATION_OF_OSTEOCLAST_DIFFERENTIATION	10	0.744012	1.58505	0.0191945	0.226458	0.206629	4	tags=10%, list=0%, signal=10%	CLDN18
GOBP_ER_NUCLEUS_SIGNALING_PATHWAY	GOBP_ER_NUCLEUS_SIGNALING_PATHWAY	46	0.539524	1.5017	0.0192183	0.226458	0.206629	2025	tags=41%, list=21%, signal=33%	CXCL8/AGR2/CCDC47/DDIT3/HSP90B1/PPP1R15A/ATF6B/GSK3B/EIF2A/XBP1/HSPA5/NFE2L2/CALR/TMEM33/ATF3/PPP1R15B/INSIG2/MBTPS1/SELENOS
GOBP_MESENCHYMAL_CELL_DIFFERENTIATION	GOBP_MESENCHYMAL_CELL_DIFFERENTIATION	108	-0.397569	-1.47985	0.0193947	0.227982	0.20802	1084	tags=27%, list=11%, signal=24%	SMAD2/TRIM28/EDN1/HES1/PHLDB1/SPRY1/PDCD4/DAB2/HPN/NOLC1/ZNF703/PDCD6/MCRIP1/TGFB1I1/BMP7/TGFBR2/ADIPOR1/STRAP/LAMA5/ENG/SNAI2/CTNNB1/ADAM15/BAMBI/FLNA/S100A4/FN1/COL1A1/SFRP2
GOBP_CELLULAR_MODIFIED_AMINO_ACID_METABOLIC_PROCESS	GOBP_CELLULAR_MODIFIED_AMINO_ACID_METABOLIC_PROCESS	91	0.471432	1.4642	0.0195136	0.228824	0.208788	1689	tags=30%, list=17%, signal=25%	DUOX2/DUOXA2/PLSCR1/SLC6A8/VNN1/IYD/GSTA1/SLC1A1/GATM/PLOD2/PLA2G10/SULT1B1/SLC7A11/CLIC1/GAMT/SHMT2/NFE2L2/SERINC1/CPQ/IDH1/CHDH/GOT2/MTHFR/GSTM3/SERINC2/GSR/MED1
GOBP_POSITIVE_REGULATION_OF_CHROMOSOME_ORGANIZATION	GOBP_POSITIVE_REGULATION_OF_CHROMOSOME_ORGANIZATION	111	0.453799	1.43693	0.0197389	0.230907	0.210688	1982	tags=32%, list=20%, signal=25%	RESF1/VEGFA/RAD21/KMT2E/ATRX/BRD4/NSD3/OGT/NUMA1/KMT2A/GNL3/NABP2/DHX36/SMC5/RAD50/MAPK3/PPP1R10/MPHOSPH8/ATR/NIPBL/SFPQ/RIF1/KAT2A/SNW1/NELFE/BCL6/TCP1/TPR/CTR9/HNRNPA1/WBP2/TASOR/RNF20/CCT6A/SDR16C5
GOCC_CLATHRIN_COAT	GOCC_CLATHRIN_COAT	35	0.568241	1.5028	0.0199139	0.23231	0.211969	1739	tags=43%, list=18%, signal=35%	CLTA/CLINT1/CLTC/AP1G2/SYNRG/IGF2R/AP2B1/AFTPH/AP2A2/PICALM/BAIAP2L2/EPN2/AP3B1/VPS41/EPN1
GOBP_NUCLEUS_LOCALIZATION	GOBP_NUCLEUS_LOCALIZATION	16	0.686644	1.60218	0.0199547	0.23231	0.211969	1716	tags=56%, list=18%, signal=46%	SYNE2/SLC9A3R1/FBXW11/DYNC1H1/PCM1/PAFAH1B1/DCTN1/HOOK3/CLMN
GOMF_DYNEIN_INTERMEDIATE_CHAIN_BINDING	GOMF_DYNEIN_INTERMEDIATE_CHAIN_BINDING	13	0.708936	1.58305	0.020127	0.233465	0.213023	1688	tags=54%, list=17%, signal=45%	BICD1/DYNC2H1/DYNC1H1/DYNLL2/DNAH14/HOOK3/DNAH5
GOMF_PROTEIN_KINASE_ACTIVITY	GOMF_PROTEIN_KINASE_ACTIVITY	300	0.384121	1.33719	0.0202106	0.233465	0.213023	2697	tags=38%, list=28%, signal=29%	ERBB3/PDK4/RIOK3/SQSTM1/SRPK1/BRD4/CSNK1D/TESK1/CDK12/STK39/MAP4K4/JAK1/TAOK3/AKAP13/PKN2/PRKCA/ERN2/TOP1/TAOK1/HIPK2/LMTK2/CSNK2A1/PAK1/RPS6KA3/GAK/MAPK3/PRKCI/FGFR4/ROCK1/GSK3B/FRK/PRKACB/IGF2R/CDK11B/SMG1/RPS6KB1/ATR/WEE1/CDC42BPB/PCK1/MAP3K2/BRAF/MAP3K5/TNIK/MKNK2/CSNK1G2/IKBKB/IRAK3/MARK2/SYK/PTK2/STK38L/BAZ1B/ACVR1B/CDK10/PRKAA1/PDPK1/CDK11A/EIF2AK1/ALPK1/CSNK1A1/MLKL/KALRN/CDC42BPA/MAP4K3/…
GOBP_GOLGI_VESICLE_TRANSPORT	GOBP_GOLGI_VESICLE_TRANSPORT	260	0.387686	1.33792	0.0202327	0.233465	0.213023	1814	tags=24%, list=19%, signal=20%	SERPINA1/SPTBN1/GOLGA4/GOLGB1/GCC2/SEC31A/VPS13A/CSNK1D/OPTN/CD59/DYNC1I2/MACF1/KDELR1/TRIP11/SPTAN1/GOLGA2/AP1G2/DYNC1LI2/DYNC1H1/GAK/PRKCI/MIA2/KRT18/AP3D1/EXOC1/TFG/F5/GOLGA3/VPS13C/ANK3/RAB6A/AMN/COPG1/COPB1/AREG/MYO18A/DNM2/GOLGA5/NSF/ARFGAP3/DYNLL2/KIF3B/DOP1A/GGA3/ARFGEF2/LYPLA1/STEAP2/SCFD1/AP1AR/RAB10/KIF16B/RAB1A/DCTN1/VTI1B/SPIRE2/KIF3A/CCDC93/USO1/YIPF5/CTSC/DCTN2/RNF139
GOBP_GOLGI_TO_PLASMA_MEMBRANE_TRANSPORT	GOBP_GOLGI_TO_PLASMA_MEMBRANE_TRANSPORT	42	0.551865	1.51191	0.0202468	0.233465	0.213023	2149	tags=45%, list=22%, signal=35%	SPTBN1/GOLGA4/OPTN/MACF1/KRT18/EXOC1/ANK3/AMN/DNM2/NSF/GGA3/ARFGEF2/LYPLA1/STEAP2/RAB10/CCDC93/SEC16A/GGA1/GOPC
GOBP_RNA_SPLICING	GOBP_RNA_SPLICING	353	0.372916	1.31184	0.0205092	0.234867	0.214302	2341	tags=32%, list=24%, signal=25%	RPS26/AHNAK2/SON/AHNAK/ACIN1/SRRM2/SRPK1/SCAF11/LGALS3/SF3B2/ZBTB7A/PNN/CDK12/FUS/RBM25/THOC2/RBM39/ZNF638/ESRP1/DDX42/YTHDC1/SNRPD1/MBNL2/PRPF38B/U2SURP/HNRNPA3/RPS13/GTF2F1/DDX39B/PABPC1/IWS1/PRPF40A/RSRC1/NCL/CCAR1/RBM6/ZRANB2/ZC3H13/SRSF11/PPIG/SPEN/TIA1/RNPC3/COIL/HNRNPU/PPP2R1A/NSRP1/SUGP2/SETX/HNRNPC/SRSF1/SREK1/RBM5/THRAP3/MBNL1/SFPQ/SNRNP200/TMBIM6/REST/TRA2B/CELF1/SRRM1/PRPF6/PPP4R2/DHX…
GOBP_MYELOID_LEUKOCYTE_DIFFERENTIATION	GOBP_MYELOID_LEUKOCYTE_DIFFERENTIATION	98	0.456392	1.43073	0.0205777	0.234867	0.214302	1762	tags=35%, list=18%, signal=29%	CLDN18/CA2/VEGFA/ITGB8/ACIN1/ITGB6/LTBR/APP/PRKCA/JUN/EFNA2/TRIB1/TESC/FOXP1/SLC9B2/HLA-DRB1/APCS/UBD/ZFPM1/TCIRG1/FARP2/TNFRSF11A/MYH9/SBNO2/TFRC/GNAS/EIF2AK1/LTF/F2RL1/AP3B1/PSEN1/MED1/PPARG/SRP54
GOBP_RECEPTOR_METABOLIC_PROCESS	GOBP_RECEPTOR_METABOLIC_PROCESS	98	0.456639	1.43151	0.0205777	0.234867	0.214302	2094	tags=42%, list=22%, signal=33%	CXCL8/CLTA/VEGFA/AHI1/ACHE/EZR/OPTN/NUMB/RAMP1/CLTC/LMTK2/GRB2/MX1/DNM2/ATXN2/AP2B1/LRP1/NSF/SMURF1/DKK1/ARFGEF2/AP2A2/RAB5A/ITGB1/SYK/TFRC/AP1AR/PICALM/SDCBP/KIF16B/CD63/BECN1/PLCG2/PSEN1/ITCH/FUT8/ADM/DTX3L/INSR/TBC1D5/MKLN1
GOBP_PLASMA_LIPOPROTEIN_PARTICLE_CLEARANCE	GOBP_PLASMA_LIPOPROTEIN_PARTICLE_CLEARANCE	27	0.603214	1.53132	0.0205966	0.234867	0.214302	1310	tags=41%, list=13%, signal=35%	CLTA/LDLR/APOC1/CLTC/HDLBP/NPC1/CNPY2/AMN/NCEH1/AP2B1/AP2A2
GOCC_INTRINSIC_COMPONENT_OF_MITOCHONDRIAL_INNER_MEMBRANE	GOCC_INTRINSIC_COMPONENT_OF_MITOCHONDRIAL_INNER_MEMBRANE	43	-0.51572	-1.64648	0.0206108	0.234867	0.214302	1216	tags=37%, list=13%, signal=33%	SAMM50/MTLN/TIMM23/SFXN3/MCUB/COA3/COX11/MTX2/TIMM17B/MTX1/SMDT1/PET100/TIMM17A/CHCHD10/SLC25A3/MT-CYB
GOMF_MICROTUBULE_MOTOR_ACTIVITY	GOMF_MICROTUBULE_MOTOR_ACTIVITY	26	0.609	1.54237	0.0208301	0.236248	0.215562	1688	tags=46%, list=17%, signal=38%	DYNC1I2/KIF21A/KIF5B/DYNC2H1/DYNC1H1/KIFC2/KIF3B/KIF16B/KIF12/DNAH14/KIF3A/DNAH5
GOBP_INNER_EAR_AUDITORY_RECEPTOR_CELL_DIFFERENTIATION	GOBP_INNER_EAR_AUDITORY_RECEPTOR_CELL_DIFFERENTIATION	18	0.659252	1.56882	0.0208434	0.236248	0.215562	742	tags=33%, list=8%, signal=31%	MYO6/SLC9A3R1/PLS1/USH1C/ESRP1/JAG1
GOBP_T_CELL_HOMEOSTASIS	GOBP_T_CELL_HOMEOSTASIS	19	-0.609124	-1.60181	0.0208784	0.236248	0.215562	1295	tags=32%, list=13%, signal=27%	FAS/BCL2L11/PMAIP1/BAX/RPS6/TSC22D3
GOBP_RESPONSE_TO_TOXIC_SUBSTANCE	GOBP_RESPONSE_TO_TOXIC_SUBSTANCE	107	-0.39365	-1.4578	0.0211828	0.239134	0.218195	762	tags=21%, list=8%, signal=20%	CNP/GSTO2/PRDX5/PRXL2C/PRDX1/CDKN1A/NXN/MGST2/BMP7/BAX/PRDX2/PRDX6/SRSF9/PRDX4/PRDX3/PTGES/MT-CYB/ASS1/MT1M/MT1G/MT1X/MT1E/MT2A
GOMF_ASPARTIC_TYPE_PEPTIDASE_ACTIVITY	GOMF_ASPARTIC_TYPE_PEPTIDASE_ACTIVITY	11	0.726673	1.58378	0.021388	0.240888	0.219796	814	tags=45%, list=8%, signal=42%	PGC/CTSE/BACE2/SPPL2B/CTSD
GOMF_INTERMEDIATE_FILAMENT_BINDING	GOMF_INTERMEDIATE_FILAMENT_BINDING	11	-0.750115	-1.77408	0.0215222	0.241838	0.220663	151	tags=45%, list=2%, signal=45%	NME1/PKP1/NME2/KRT14/VIM
GOBP_EXECUTION_PHASE_OF_APOPTOSIS	GOBP_EXECUTION_PHASE_OF_APOPTOSIS	46	-0.497809	-1.6103	0.0215957	0.242102	0.220903	362	tags=11%, list=4%, signal=11%	BAX/DEDD2/PTGIS/HMGB2/MTRNR2L12
GOBP_MUSCLE_CELL_MIGRATION	GOBP_MUSCLE_CELL_MIGRATION	42	-0.500092	-1.59333	0.0217106	0.242827	0.221565	186	tags=17%, list=2%, signal=16%	ARPC5/ADAMTS1/IGF1/IGFBP3/S100A11/ANXA1/SERPINE1
GOBP_POSITIVE_REGULATION_OF_DNA_TEMPLATED_TRANSCRIPTION_ELONGATION	GOBP_POSITIVE_REGULATION_OF_DNA_TEMPLATED_TRANSCRIPTION_ELONGATION	22	0.650644	1.60487	0.0218649	0.243286	0.221984	2222	tags=55%, list=23%, signal=42%	BRD4/CDK12/GTF2F1/DDX39B/SUPT4H1/SCAF8/SUPT6H/CDK13/HMGN1/CCNT2/ALYREF/TCERG1
GOCC_MICROVILLUS	GOCC_MICROVILLUS	53	0.524628	1.49555	0.0218723	0.243286	0.221984	1009	tags=25%, list=10%, signal=22%	CDHR2/CA2/MYO6/STARD10/S100P/SLC9A3R1/EZR/CDHR5/USH1C/PTPRH/IQGAP2/MYO7B/VIL1
GOBP_REGULATION_OF_PEPTIDE_SECRETION	GOBP_REGULATION_OF_PEPTIDE_SECRETION	146	0.427248	1.39789	0.0219107	0.243286	0.221984	2207	tags=39%, list=23%, signal=31%	RAB11FIP1/ADAM9/CFTR/SOX4/LLGL2/FAM3D/ACHE/CD2AP/EZR/SAA1/CHD7/TCF7L2/PRKCA/KIF5B/AIMP1/HIF1A/C1QTNF12/ANG/CASR/SLC9B2/EXOC1/HLA-DRB1/HNF4A/SLC16A1/MIDN/MYO18A/TCIRG1/MPC2/LRP1/REST/MCU/SLC12A2/FKBP1B/FOXA2/HMGN3/CYP51A1/PPID/MYOM1/ABCG1/ICA1/KALRN/F2RL1/SRI/UQCC2/ARFIP1/PCK2/PFKL/DNM1L/NR0B2/EFNA5/DNAJC1/CACNA1D/TARDBP/CPT1A/ARL2BP/PER2/STXBP5
GOBP_PROTEIN_METHYLATION	GOBP_PROTEIN_METHYLATION	111	0.451088	1.42835	0.0219525	0.243286	0.221984	1661	tags=25%, list=17%, signal=21%	MECOM/KMT2E/ATRX/BRD4/BTG2/PCMTD1/KMT2C/NSD3/OGT/KMT2A/IWS1/ARID4A/KDM3A/MLLT6/SETD2/RAB6A/SETD5/ZNF274/ASH1L/RIF1/SNW1/NELFE/SUPT6H/MTHFR/CTR9/TET2/KMT2D/CARM1
GOBP_REGULATION_OF_ENDOTHELIAL_CELL_MIGRATION	GOBP_REGULATION_OF_ENDOTHELIAL_CELL_MIGRATION	89	-0.404037	-1.45122	0.0220755	0.243786	0.22244	597	tags=12%, list=6%, signal=12%	PDCD6/FGF1/EPHA2/ETS1/ATP2B4/SERPINF1/ANXA1/TMSB4X/THBS1/SPARC/DCN
GOBP_ANAPHASE_PROMOTING_COMPLEX_DEPENDENT_CATABOLIC_PROCESS	GOBP_ANAPHASE_PROMOTING_COMPLEX_DEPENDENT_CATABOLIC_PROCESS	59	-0.464065	-1.58048	0.0220983	0.243786	0.22244	1471	tags=37%, list=15%, signal=32%	PSME1/PSMA4/PSMC3/PSMB6/PSMA1/ANAPC15/ECRG4/PSMD2/PSMD9/PSMC2/PSMA7/PSMB2/ANAPC16/PSMB3/PSMB7/PSMD8/PSMB5/PSMA2/PSMD4/RPS27A/PSMB4/UBC
GOBP_REGULATION_OF_MYELOID_LEUKOCYTE_DIFFERENTIATION	GOBP_REGULATION_OF_MYELOID_LEUKOCYTE_DIFFERENTIATION	53	0.524427	1.49498	0.0222664	0.245082	0.223622	1037	tags=23%, list=11%, signal=20%	CLDN18/CA2/ACIN1/PRKCA/JUN/TRIB1/TESC/FOXP1/SLC9B2/HLA-DRB1/APCS/ZFPM1
GOBP_MITOCHONDRIAL_ELECTRON_TRANSPORT_NADH_TO_UBIQUINONE	GOBP_MITOCHONDRIAL_ELECTRON_TRANSPORT_NADH_TO_UBIQUINONE	41	-0.518564	-1.66325	0.0223309	0.245234	0.223762	1531	tags=56%, list=16%, signal=47%	PINK1/NDUFA2/NDUFA9/DLD/NDUFS3/NDUFS4/NDUFB6/NDUFA6/NDUFA11/NDUFA3/NDUFC2/MT-ND1/NDUFB4/MT-ND2/MT-ND3/NDUFA12/NDUFS5/ISCU/NDUFB2/NDUFB3/NDUFAB1/NDUFS6/NDUFA1
GOBP_REGULATION_OF_VASCULAR_PERMEABILITY	GOBP_REGULATION_OF_VASCULAR_PERMEABILITY	18	0.656729	1.56282	0.0227541	0.249317	0.227487	1931	tags=50%, list=20%, signal=40%	VEGFA/TJP2/OCLN/C2CD4B/TJP3/ARHGAP35/DDAH1/ADM/C2CD4A
GOBP_POSITIVE_REGULATION_OF_POTASSIUM_ION_TRANSPORT	GOBP_POSITIVE_REGULATION_OF_POTASSIUM_ION_TRANSPORT	16	0.680378	1.58756	0.0229489	0.250169	0.228265	466	tags=31%, list=5%, signal=30%	FXYD2/ATP1B1/AKAP9/STK39/KIF5B
GOMF_CHROMATIN_DNA_BINDING	GOMF_CHROMATIN_DNA_BINDING	61	0.50396	1.47329	0.0229642	0.250169	0.228265	2001	tags=43%, list=21%, signal=34%	SMARCC2/STAT3/JMJD1C/FOXO3/SMARCA4/SMARCC1/KDM3A/TOX3/HNRNPU/HNRNPC/SMAD3/TOX4/SBNO2/HMGN3/HDAC2/KDM6B/THRB/BCL6/GRHL2/HMGN1/MED1/SMARCD2/WBP2/EP300/CHD4/SRF
GOCC_CELL_SUBSTRATE_JUNCTION	GOCC_CELL_SUBSTRATE_JUNCTION	286	-0.311762	-1.30347	0.0229945	0.250169	0.228265	735	tags=21%, list=8%, signal=20%	PLAUR/REXO2/PXN/TM4SF20/PROCR/ITGB5/MAP2K2/VASP/FLOT2/ARPC5/RAC2/TGFB1I1/ADAM10/TRIOBP/ACTN4/PPP1CB/CAP1/EPHA2/ARF1/RPL8/HACD3/MAPRE1/ENG/NCSTN/PFN1/NECTIN2/ACTB/ITGA5/CNN2/PPIA/TSPAN4/RPS7/RPS14/RPL18/RPS3/CTNNB1/CAPN2/RPS18/RPS16/RPL5/RPL10A/CD81/RPL37A/FLNA/RPLP0/RPS3A/RPL7A/LCP1/RPL3/B2M/RPS19/TNS4/RPLP1/COL17A1/RPS4X/HSPA1A/ANXA1/CD9/VIM
GOBP_SEXUAL_REPRODUCTION	GOBP_SEXUAL_REPRODUCTION	305	0.374869	1.30603	0.0231176	0.250169	0.228265	1676	tags=24%, list=17%, signal=21%	SPINK1/ABHD2/TSPAN8/CFTR/PI3/ADAM28/EREG/DEFB1/STAT3/ACOX1/SOX9/SRPK1/ATRX/AFF4/APP/TESK1/DIAPH2/FBXW11/HERC4/TMF1/CEP57/DHX36/UBR2/ARID4A/KDM3A/ANG/TRIM27/TUT4/PLA2G10/PRKAR1A/ANKRD49/IGF2R/GOLGA3/YY1/AGFG1/RPS6KB1/GAMT/SETX/ACE/HPGD/SERPINA5/LGR4/SUN1/DNM2/TUT7/PSME4/ASH1L/PGM3/CELF1/PIAS1/SMAD5/SPAG16/CCNI/NRIP1/HOOK1/HDAC2/RAI14/ZNF148/PAFAH1B1/THRB/PLEKHA1/KDM5A/NECTIN3/BCL6/GGNBP2/FOXA3/TCP…
GOBP_NEGATIVE_REGULATION_OF_EPITHELIAL_CELL_MIGRATION	GOBP_NEGATIVE_REGULATION_OF_EPITHELIAL_CELL_MIGRATION	36	-0.529711	-1.64898	0.0231356	0.250169	0.228265	459	tags=17%, list=5%, signal=16%	ADIPOR1/STRAP/ATP2B4/SERPINF1/THBS1/DCN
GOCC_POLYSOME	GOCC_POLYSOME	52	-0.478606	-1.59172	0.0231825	0.250169	0.228265	453	tags=35%, list=5%, signal=33%	DHX9/RPL32/NAA38/RPS23/RPL8/RPL18/RPS3/RPS4Y1/RPL36A/RPL10A/RPS28/RPL11/RPS21/RPL39/RPL7A/RPS6/RPS4X/VIM
GOBP_ORGANIC_HYDROXY_COMPOUND_METABOLIC_PROCESS	GOBP_ORGANIC_HYDROXY_COMPOUND_METABOLIC_PROCESS	281	0.388877	1.34989	0.0231935	0.250169	0.228265	2324	tags=31%, list=24%, signal=24%	DUOX2/CYP3A5/CFTR/DUOXA2/SRD5A3/LIMA1/APOL1/GBA2/INPP4B/OSBPL1A/LDLR/SQLE/APP/ALDH1A1/SGPP2/IYD/SNCAIP/ALDH3B1/HDLBP/AKR1B10/ATP8B1/NPC1/OSBPL2/HIF1A/RDH11/FGFR4/ALDH3A2/SULT1B1/CYP4F3/PLPP2/SLC7A11/SULT1E1/PCK1/ADH1C/PNPLA2/HMGCS1/FMO5/PPIP5K2/REST/NPC1L1/NAPEPLD/SORD/AKR1C3/CPQ/IDH1/SLC5A3/PRKAA1/CYP51A1/DHRS3/ACLY/APPL1/ABCG1/PLCG2/GPD1/MAOB/GK5/MED1/CAT/PCK2/NUS1/SOD1/NR0B2/INSIG2/MBTPS1/SDR1…
GOBP_PHOTORECEPTOR_CELL_DIFFERENTIATION	GOBP_PHOTORECEPTOR_CELL_DIFFERENTIATION	22	0.647506	1.59713	0.0235308	0.253047	0.23089	884	tags=32%, list=9%, signal=29%	VEGFA/AHI1/STAT3/SOX9/USH1C/PRKCI/CEP290
GOCC_CYTOPLASMIC_STRESS_GRANULE	GOCC_CYTOPLASMIC_STRESS_GRANULE	57	0.515289	1.48913	0.0235647	0.253047	0.23089	2092	tags=44%, list=22%, signal=35%	PRRC2C/STAU1/EIF4G1/DHX36/PABPC1/LARP4B/LARP1/ROCK1/GIGYF2/TIA1/MBNL1/ATXN2/CELF1/NUFIP2/GRB7/ZFAND1/ENDOV/LARP4/TRIM25/PUM1/DDX6/RBM4/PRKAA2/TARDBP/PUM2
GOBP_ENDODERM_FORMATION	GOBP_ENDODERM_FORMATION	27	-0.563756	-1.61436	0.0236718	0.253634	0.231425	1084	tags=44%, list=11%, signal=40%	MESP1/MMP14/SMAD2/HSBP1/PAF1/ITGB5/DUSP1/ITGA5/COL6A1/COL4A2/FN1/MMP2
GOBP_MITOTIC_CYTOKINESIS	GOBP_MITOTIC_CYTOKINESIS	43	0.540099	1.48924	0.0238233	0.25439	0.232115	1431	tags=28%, list=15%, signal=24%	SPTBN1/SON/CHMP2B/CHMP4C/SNX9/ROCK1/ANK3/PDCD6IP/CUL7/APC/MAP9/RTKN
GOBP_NEGATIVE_REGULATION_OF_LEUKOCYTE_MIGRATION	GOBP_NEGATIVE_REGULATION_OF_LEUKOCYTE_MIGRATION	16	-0.655536	-1.69655	0.023864	0.25439	0.232115	364	tags=25%, list=4%, signal=24%	DUSP1/NBL1/CXCL12/APOD
GOCC_ORGANELLAR_RIBOSOME	GOCC_ORGANELLAR_RIBOSOME	79	-0.412774	-1.45112	0.0238999	0.25439	0.232115	1114	tags=25%, list=11%, signal=23%	MRPL40/MRPS36/MRPL34/MRPS15/MRPL9/MRPS14/MRPS26/MRPL57/MRPL27/MRPL33/MRPL55/CHCHD1/MRPL24/MRPS12/MRPL43/NDUFAB1/MRPL36/MRPL20/MRPS24/MRPL51
GOBP_EPITHELIAL_TO_MESENCHYMAL_TRANSITION	GOBP_EPITHELIAL_TO_MESENCHYMAL_TRANSITION	76	-0.431497	-1.51191	0.0240514	0.25508	0.232745	1084	tags=33%, list=11%, signal=29%	SMAD2/TRIM28/PHLDB1/SPRY1/PDCD4/DAB2/HPN/NOLC1/ZNF703/PDCD6/MCRIP1/TGFB1I1/BMP7/TGFBR2/ADIPOR1/STRAP/ENG/SNAI2/CTNNB1/ADAM15/BAMBI/FLNA/S100A4/COL1A1/SFRP2
GOMF_ENDOPEPTIDASE_ACTIVATOR_ACTIVITY	GOMF_ENDOPEPTIDASE_ACTIVATOR_ACTIVITY	10	-0.752357	-1.74242	0.0240777	0.25508	0.232745	894	tags=60%, list=9%, signal=55%	PSME2/PSME1/ADRM1/APH1A/PSENEN/SFRP2
GOBP_AMINOGLYCAN_CATABOLIC_PROCESS	GOBP_AMINOGLYCAN_CATABOLIC_PROCESS	28	-0.5917	-1.71563	0.0241228	0.25508	0.232745	27	tags=14%, list=0%, signal=14%	HEXB/BGN/LUM/DCN
GOCC_LAMELLIPODIUM	GOCC_LAMELLIPODIUM	120	0.442076	1.41871	0.0249679	0.263442	0.240375	2087	tags=38%, list=21%, signal=30%	SYNE2/FGD4/CTNND1/CCDC88A/CDH1/SH3RF1/APP/P4HB/PKN2/FGD6/TESC/RAPH1/CTNNA1/PABPC1/CORO1B/PAK1/PPP1R9A/ROCK1/GSN/SHTN1/CFL1/IQGAP2/PLEKHH2/ABI1/DNM2/VIL1/CDC42BPB/APC/NHS/SORBS2/ITGB1/CTTNBP2NL/RUFY3/ABI2/SWAP70/CDC42BPA/CARMIL1/TSC1/ACTR2/FER/CTTN/ACTR3/CD44/MYO10/WASL
GOMF_HELICASE_ACTIVITY	GOMF_HELICASE_ACTIVITY	112	0.444224	1.41048	0.0252111	0.265429	0.242188	1965	tags=37%, list=20%, signal=30%	EIF4A2/DDX21/CHD9/ATRX/ASCC3/CHD2/CHD7/DDX42/DDX18/CHD8/DHX36/DDX39B/RAD50/ZNFX1/SMARCA4/CHD1/SMARCA1/SMARCA5/SHPRH/SETX/DDX27/EP400/HELZ/SNRNP200/DICER1/DHX16/DDX24/HELZ2/DDX5/DHX40/DHX38/DDX58/SKIV2L/DDX46/DDX23/ERCC6L2/MTREX/CHD6/CHD4/DDX6/DDX10
GOBP_ELECTRON_TRANSPORT_CHAIN	GOBP_ELECTRON_TRANSPORT_CHAIN	117	-0.38683	-1.43011	0.02594	0.272511	0.24865	1580	tags=47%, list=16%, signal=40%	DGUOK/UQCR11/PINK1/NDUFA2/GHITM/NDUFA9/DLD/SDHD/AKR1A1/GPD2/COX8A/IDH3B/SURF1/AIFM2/NCF2/COX7A2/NDUFS3/NDUFS4/CHCHD2/FDX1/COX11/MT-CO2/NDUFB6/COX5A/SDHA/NDUFA6/BID/NDUFA11/AKR7A2/CYB5B/AKR1B1/NDUFA3/COX7B/NDUFC2/MT-ND1/DEGS1/NDUFB4/MT-ND2/MT-ND3/NDUFA12/COX6A1/NDUFS5/ISCU/COA6/SDHC/UQCRQ/UQCRFS1/NDUFB2/UQCR10/NDUFB3/NDUFAB1/NDUFS6/MT-CO3/NDUFA1/MT-CYB
GOCC_TIM23_MITOCHONDRIAL_IMPORT_INNER_MEMBRANE_TRANSLOCASE_COMPLEX	GOCC_TIM23_MITOCHONDRIAL_IMPORT_INNER_MEMBRANE_TRANSLOCASE_COMPLEX	11	-0.733721	-1.73531	0.0260501	0.272713	0.248834	1178	tags=55%, list=12%, signal=48%	GRPEL2/TIMM23/PAM16/TIMM17B/TIMM10/TIMM17A
GOBP_MITOCHONDRIAL_ELECTRON_TRANSPORT_CYTOCHROME_C_TO_OXYGEN	GOBP_MITOCHONDRIAL_ELECTRON_TRANSPORT_CYTOCHROME_C_TO_OXYGEN	13	-0.706106	-1.75501	0.0260719	0.272713	0.248834	1804	tags=69%, list=19%, signal=56%	MT-CO1/COX4I1/CYCS/COX8A/MT-CO2/COX5A/COX7B/COX6A1/MT-CO3
GOMF_CARBOHYDRATE_KINASE_ACTIVITY	GOMF_CARBOHYDRATE_KINASE_ACTIVITY	14	0.695278	1.57381	0.0261379	0.272814	0.248927	1181	tags=36%, list=12%, signal=31%	PFKFB3/HKDC1/HK2/GNE/PFKP
GOBP_MUCOPOLYSACCHARIDE_METABOLIC_PROCESS	GOBP_MUCOPOLYSACCHARIDE_METABOLIC_PROCESS	56	-0.460872	-1.54693	0.0266562	0.277626	0.253317	368	tags=12%, list=4%, signal=12%	HAS1/B4GALT1/CHPF/ST3GAL4/BGN/LUM/DCN
GOCC_DISTAL_AXON	GOCC_DISTAL_AXON	122	0.442142	1.41974	0.0269944	0.280484	0.255925	1913	tags=34%, list=20%, signal=27%	ITGA2/CTNND1/CLCN3/APP/KIF5B/SLC1A1/MYH14/UTRN/LMTK2/CPEB4/ANG/CASR/PPP1R9A/EXOC7/AP3D1/SHTN1/EPS8/SETX/MYO9A/HSP90AB1/ABI1/DNM2/MAPK8IP3/DVL1/LRP1/DICER1/NDRG2/FXR1/RAB5A/RUFY3/PRSS12/HSP90AA1/MICAL1/MAP2/TSC1/SRI/PSEN1/DCTN2/PARD3/CTTN/TAOK2
GOBP_RIBOSOMAL_SMALL_SUBUNIT_ASSEMBLY	GOBP_RIBOSOMAL_SMALL_SUBUNIT_ASSEMBLY	13	-0.700207	-1.74035	0.0270465	0.280484	0.255925	243	tags=46%, list=2%, signal=45%	PRKDC/RPS15/RPS14/RPS27/RPS28/RPS19
GOBP_MICROVILLUS_ORGANIZATION	GOBP_MICROVILLUS_ORGANIZATION	19	0.657474	1.58038	0.0271255	0.280703	0.256124	1180	tags=58%, list=12%, signal=51%	CDHR2/SLC9A3R1/PLD1/PLS1/EZR/CDHR5/USH1C/KLF5/ATP8B1/VIL1/TNIK
GOBP_COVALENT_CHROMATIN_MODIFICATION	GOBP_COVALENT_CHROMATIN_MODIFICATION	313	0.372097	1.29683	0.0272628	0.281522	0.256872	2496	tags=30%, list=26%, signal=23%	RESF1/MECOM/VEGFA/KMT2E/JMJD1C/ATRX/BRD4/KAT6B/TAF7/KMT2C/NSD3/OGT/KMT2A/PRKCA/MBIP/UBR5/KANSL1/BAZ2A/PHF20L1/UBR2/IWS1/TBL1XR1/ARID4A/KDM3A/MAPK3/MLLT6/SETD2/MPHOSPH8/CHD1/TRIP12/EP400/PHF14/NIPBL/SETD5/BRMS1/SFPQ/ZNF274/ASH1L/USP16/KANSL1L/REST/RIF1/KAT6A/HDAC2/KAT2A/SNW1/NELFE/KDM6B/OTUB1/SUPT6H/KDM2A/BAZ1B/KDM5A/PRKAA1/BCL6/USP3/UFL1/MTHFR/CTR9/USP36/TET2/KMT2D/CARM1/WBP2/EP300/MYSM1/ATF2/TAS…
GOCC_TRANS_GOLGI_NETWORK	GOCC_TRANS_GOLGI_NETWORK	167	0.410994	1.36351	0.0273517	0.281839	0.257161	1500	tags=24%, list=15%, signal=21%	GOLGA4/CLTA/ST3GAL1/RGP1/GCC2/TGOLN2/CDH1/APP/OPTN/ARFGEF1/BICD1/BACE2/FUT4/SNX9/CLTC/GRN/ATP8B1/BIRC6/PCSK5/CCDC186/FAM91A1/HLA-DRB1/IGF2R/PIK3C2A/RAB6A/ATP7B/AP1S3/STX16/MYO18A/DNM2/HLA-DRB5/ATXN2/DOP1A/ATP11A/GGA3/ARFGEF2/AFTPH/SCAMP4/RAB10/BECN1
GOMF_EXTRACELLULAR_MATRIX_BINDING	GOMF_EXTRACELLULAR_MATRIX_BINDING	27	-0.551948	-1.58055	0.0277767	0.28561	0.260602	231	tags=26%, list=2%, signal=25%	ELN/TGFBI/THBS1/SPARCL1/BGN/SPARC/DCN
GOBP_REGULATION_OF_EXTRINSIC_APOPTOTIC_SIGNALING_PATHWAY_VIA_DEATH_DOMAIN_RECEPTORS	GOBP_REGULATION_OF_EXTRINSIC_APOPTOTIC_SIGNALING_PATHWAY_VIA_DEATH_DOMAIN_RECEPTORS	37	-0.533038	-1.64875	0.0278366	0.28562	0.260611	177	tags=32%, list=2%, signal=32%	FAIM/FAS/DDX3X/FAF1/SKIL/PMAIP1/PEA15/HMGB2/TIMP3/THBS1/SERPINE1/SFRP2
GOBP_POSITIVE_REGULATION_OF_CELL_DEATH	GOBP_POSITIVE_REGULATION_OF_CELL_DEATH	358	-0.288744	-1.20883	0.0280586	0.286962	0.261835	1013	tags=20%, list=10%, signal=18%	CTLA4/FAF1/BCL2L11/MTCH1/NET1/SKIL/TSPO/ELK1/SLFN11/FOXO1/PDCD4/TGM2/MT-CO2/PMAIP1/SORT1/UBE2M/MCL1/STK17A/CDC42/HLA-G/BCAP31/PHB/TOMM22/BID/CDKN1A/TNFRSF1B/TNFSF12/HEBP2/APH1A/PTPA/ADAM10/FYN/BMP7/PEA15/SAP18/E2F1/NCSTN/B4GALT1/DUSP1/BAX/PSENEN/DEDD2/PTGIS/DNAJA1/ITM2C/PRELID1/C1QBP/GADD45B/RPS7/PDCD5/RPS3/CTNNB1/RPS27A/CAPN2/BTG1/RPL26/UCP2/RPL11/RPS6/PRNP/UBC/SFRP4/CDKN2A/ALDH1A3/IGFBP3/TIMP3/…
GOBP_NEGATIVE_REGULATION_OF_EPITHELIAL_CELL_PROLIFERATION	GOBP_NEGATIVE_REGULATION_OF_EPITHELIAL_CELL_PROLIFERATION	71	-0.422956	-1.47605	0.0280859	0.286962	0.261835	441	tags=15%, list=5%, signal=15%	STRAP/PHB2/SNAI2/RUNX3/KRT4/CD109/B2M/SERPINF1/THBS1/SFRP2/SPARC
GOBP_ALCOHOL_METABOLIC_PROCESS	GOBP_ALCOHOL_METABOLIC_PROCESS	207	0.403838	1.36815	0.028211	0.287634	0.262448	2324	tags=32%, list=24%, signal=25%	CYP3A5/CFTR/SRD5A3/LIMA1/APOL1/GBA2/INPP4B/OSBPL1A/LDLR/SQLE/APP/ALDH1A1/SGPP2/ALDH3B1/HDLBP/AKR1B10/NPC1/RDH11/ALDH3A2/SULT1B1/PLPP2/SULT1E1/PCK1/ADH1C/PNPLA2/HMGCS1/FMO5/PPIP5K2/REST/NPC1L1/NAPEPLD/SORD/AKR1C3/IDH1/SLC5A3/PRKAA1/CYP51A1/DHRS3/ACLY/ABCG1/PLCG2/GPD1/GK5/CAT/PCK2/NUS1/SOD1/NR0B2/INSIG2/MBTPS1/SDR16C5/MOGAT1/RDH5/PRKAA2/PLCH2/DHCR24/INPP1/FDFT1/CLN8/IMPA1/SYNJ2/SPTLC2/LPCAT3/ACACA/…
GOBP_NUCLEOSIDE_TRIPHOSPHATE_BIOSYNTHETIC_PROCESS	GOBP_NUCLEOSIDE_TRIPHOSPHATE_BIOSYNTHETIC_PROCESS	54	-0.456057	-1.53122	0.028738	0.292391	0.266789	1643	tags=46%, list=17%, signal=39%	MT-ATP8/NME7/ATP5MC3/DGUOK/PINK1/AK1/STOML2/PARP1/ATP5PO/NUDT2/MT-CO2/VCP/ATP5F1A/ATP5MC2/ATP5F1D/NME1/IMPDH2/NME3/ATP5PF/ATP5MG/ATP5F1E/MT-ATP6/ATP5ME/NME2/TMSB4X
GOBP_RESPONSE_TO_MECHANICAL_STIMULUS	GOBP_RESPONSE_TO_MECHANICAL_STIMULUS	97	-0.391567	-1.42103	0.0289054	0.293478	0.267781	491	tags=13%, list=5%, signal=13%	FYN/TGFBR2/ETS1/ENG/CNN2/MMP7/CTNNB1/AQP1/CXCL12/THBS1/COL1A1/COL3A1/DCN
GOBP_REGULATION_OF_CYTOSKELETON_ORGANIZATION	GOBP_REGULATION_OF_CYTOSKELETON_ORGANIZATION	295	0.373827	1.30085	0.0294118	0.297763	0.271691	2112	tags=34%, list=22%, signal=28%	SPTBN1/TRIM54/AKAP9/LIMA1/GBA2/CCDC88A/SDC4/ADD3/CD2AP/HIP1R/ARHGEF5/TESK1/OCLN/ARFGEF1/BICD1/ARHGAP18/CHMP2B/AKAP13/CHMP4C/NUMA1/CLIP1/BAIAP2L1/SNX9/CLTC/BMERB1/TAOK1/SPTAN1/SENP6/GRB2/CORO1B/PAK1/DYNC1H1/VILL/MAPK3/PPP1R9A/DIAPH1/TRIM27/ACTG1/ROCK1/CDC42EP4/ARHGDIA/GSK3B/GSN/ARPC1A/NEB/IQGAP2/EPS8/HNRNPU/RASSF7/PLEKHH2/VIL1/SMAD3/SCIN/LRP1/APC/CAPN6/PLXNB1/ADD1/FMN1/MAP9/KAT2A/MARK2/PTK2/CKAP5/…
GOBP_PEPTIDE_SECRETION	GOBP_PEPTIDE_SECRETION	197	0.40131	1.35295	0.0294785	0.297763	0.271691	2207	tags=36%, list=23%, signal=28%	RAB11FIP1/ADAM9/CFTR/SOX4/LLGL2/FAM3D/ACHE/CD2AP/EZR/SAA1/CHD7/TCF7L2/PRKCA/KIF5B/AIMP1/HIF1A/PCSK5/C1QTNF12/CCDC186/ANG/CASR/PPY/SLC9B2/MIA2/HNF1B/EXOC1/HLA-DRB1/HNF4A/SLC16A1/PDIA4/SEL1L/COPG1/MIDN/MYO18A/RAB3B/TCIRG1/MPC2/LRP1/ARFGAP3/REST/PCLO/MCU/SLC12A2/FKBP1B/FOXA2/HMGN3/RAB10/CYP51A1/PPID/MYOM1/RAB1A/ABCG1/ICA1/KALRN/F2RL1/SRI/UQCC2/ARFIP1/PCK2/PFKL/DNM1L/RAB11FIP2/NR0B2/EFNA5/DNAJC1/CACN…
GOBP_METAL_ION_TRANSPORT	GOBP_METAL_ION_TRANSPORT	196	0.401832	1.3539	0.0295119	0.297763	0.271691	1920	tags=26%, list=20%, signal=21%	SPINK1/ERO1A/SLC40A1/FXYD2/ATP1B1/AHNAK/SLC4A4/DDIT3/KCNE3/IBTK/LGALS3/SESTD1/VDAC1/CHD7/TMEM37/RAMP1/MICU1/SLC41A2/SEC61A1/ATP1A1/YME1L1/CASR/DIAPH1/TRIM27/SLC39A11/GPR35/ATP7B/SPG7/NPSR1/ATP2C2/CEMIP/TMBIM6/EPB41/MCU/FKBP1B/ICAM1/KCNK5/PDPK1/PLCG2/SLC39A5/SRI/CCS/PSEN1/CRACR2B/SLC30A7/SLC25A25/TMEM38A/ATP2C1/SLC11A2/TMEM165/DNM1L
GOBP_BONE_CELL_DEVELOPMENT	GOBP_BONE_CELL_DEVELOPMENT	16	0.670256	1.56394	0.0298119	0.300165	0.273882	2001	tags=50%, list=21%, signal=40%	CLDN18/FOXP1/SLC9B2/ZFPM1/LTF/MED1/EP300/SRF
GOBP_POSITIVE_REGULATION_OF_LEUKOCYTE_APOPTOTIC_PROCESS	GOBP_POSITIVE_REGULATION_OF_LEUKOCYTE_APOPTOTIC_PROCESS	13	-0.69135	-1.71833	0.0299704	0.301134	0.274766	362	tags=31%, list=4%, signal=30%	BAX/PRELID1/CDKN2A/ANXA1
GOBP_SKELETAL_MUSCLE_TISSUE_REGENERATION	GOBP_SKELETAL_MUSCLE_TISSUE_REGENERATION	17	-0.666027	-1.74894	0.030171	0.302522	0.276033	772	tags=35%, list=8%, signal=33%	PPP3CA/TGFBR2/CD81/IGF1/ANXA1/CD9
GOMF_PHOSPHATIDYLINOSITOL_3_5_BISPHOSPHATE_BINDING	GOMF_PHOSPHATIDYLINOSITOL_3_5_BISPHOSPHATE_BINDING	18	0.645331	1.5357	0.0304095	0.304284	0.277641	483	tags=28%, list=5%, signal=26%	WDR45B/SESTD1/HIP1R/PLEKHA5/PLEKHA4
GOMF_TRANSFORMING_GROWTH_FACTOR_BETA_BINDING	GOMF_TRANSFORMING_GROWTH_FACTOR_BETA_BINDING	10	-0.74492	-1.7252	0.0306229	0.305547	0.278794	813	tags=60%, list=8%, signal=55%	HYAL2/TWSG1/TGFBR2/ENG/CD109/THBS1
GOMF_UBIQUITIN_LIKE_PROTEIN_TRANSFERASE_ACTIVITY	GOMF_UBIQUITIN_LIKE_PROTEIN_TRANSFERASE_ACTIVITY	277	0.375988	1.30276	0.0307018	0.305547	0.278794	2762	tags=33%, list=28%, signal=24%	BIRC3/TRIM54/RNF213/RNF19A/TRIM44/TRIM31/SH3RF1/RNF128/TRIM56/TTC3/HECTD1/FBXW11/TRIM15/RNF103/HERC4/UBR5/BIRC6/UBR2/XIAP/LMO7/NFX1/TRIM27/NEDD4L/WWP1/SHPRH/SEL1L/TRIP12/RNF38/TRIM38/MIB1/SMURF1/CBX4/PIAS1/RNF41/TRIM47/PJA2/UBE2K/ARIH2/HERC2/CHFR/RNF141/UFL1/CCNB1IP1/SH3RF2/FBXO9/TOPORS/TRIM4/TRIM25/MED1/PPP1R11/ITCH/TRIM14/PELI2/RNF139/ANKIB1/UBE2Z/HECTD4/RNF20/RMND5A/DTX3L/RNF8/TRIM2/MAEA/VHL/T…
GOCC_NADH_DEHYDROGENASE_COMPLEX	GOCC_NADH_DEHYDROGENASE_COMPLEX	39	-0.504454	-1.57196	0.0307852	0.305547	0.278794	1158	tags=46%, list=12%, signal=41%	NDUFS3/NDUFS4/NDUFB6/NDUFA6/NDUFA11/NDUFA3/NDUFC2/MT-ND1/NDUFB4/MT-ND2/MT-ND3/NDUFA12/NDUFS5/NDUFB2/NDUFB3/NDUFAB1/NDUFS6/NDUFA1
GOCC_PLASMA_MEMBRANE_BOUNDED_CELL_PROJECTION_CYTOPLASM	GOCC_PLASMA_MEMBRANE_BOUNDED_CELL_PROJECTION_CYTOPLASM	108	0.449265	1.41619	0.0307882	0.305547	0.278794	2328	tags=36%, list=24%, signal=28%	DST/TRAK1/HIP1R/FBXW11/SEPTIN9/KIF5B/DYNC2H1/HIF1A/DYNC1H1/RAB27B/AP3D1/PRKAR1A/IFT172/MAP4/HNRNPU/MAPK8IP3/HSPB1/SFPQ/PRKAR2A/KIF3B/SPAG16/ARFGEF2/CFAP36/PAFAH1B1/DNAH14/ATG14/MAP2/PURA/KIF3A/AP3B1/DNAH5/ARMCX3/DCDC2/SOD1/DNAJB13/CFAP221/MNS1/CFAP70/TTLL3
GOBP_POSITIVE_REGULATION_OF_COAGULATION	GOBP_POSITIVE_REGULATION_OF_COAGULATION	13	-0.687791	-1.70949	0.030945	0.305904	0.279119	325	tags=31%, list=3%, signal=30%	PRDX2/ST3GAL4/THBS1/SERPINE1
GOBP_DEVELOPMENTAL_PROCESS_INVOLVED_IN_REPRODUCTION	GOBP_DEVELOPMENTAL_PROCESS_INVOLVED_IN_REPRODUCTION	386	0.356166	1.26181	0.0309829	0.305904	0.279119	1692	tags=26%, list=17%, signal=23%	SPINK1/ABHD2/TSPAN8/CFTR/VEGFA/KRT8/ITGB8/ADAM28/EREG/DEFB1/SPP1/ACOX1/SOX9/SRPK1/BPTF/ATRX/AFF4/TESK1/DIAPH2/GATA6/HSD17B2/BSG/CHD7/FBXW11/HERC4/TMF1/TESC/CTNNA1/CEP57/DHX36/HIF1A/TIPARP/BIRC6/UBR2/GRB2/SMARCC1/ARID4A/KDM3A/ANG/MAPK3/TRIM27/TUT4/HNF4A/SETD2/ANKRD49/IGF2R/GOLGA3/YY1/CUL7/AGFG1/RPS6KB1/SAFB2/GAMT/SETX/ACE/SERPINA5/HSPA5/LGR4/SUN1/HSP90AB1/DNM2/NIPBL/TUT7/PSME4/RNF38/ASH1L/ST14/HMG…
GOBP_GLOBAL_GENOME_NUCLEOTIDE_EXCISION_REPAIR	GOBP_GLOBAL_GENOME_NUCLEOTIDE_EXCISION_REPAIR	15	-0.628825	-1.61268	0.0310461	0.305904	0.279119	1143	tags=33%, list=12%, signal=29%	PARP1/CETN2/RPS27A/RBX1/UBC
GOBP_INTERMEDIATE_FILAMENT_BASED_PROCESS	GOBP_INTERMEDIATE_FILAMENT_BASED_PROCESS	27	-0.545166	-1.56113	0.0310767	0.305904	0.279119	151	tags=26%, list=2%, signal=26%	TOR1A/DNAJB6/PKP1/KRT17/KRT14/VIM/KRT16
GOMF_KINASE_BINDING	GOMF_KINASE_BINDING	441	0.349257	1.24684	0.0316122	0.310544	0.283352	2125	tags=30%, list=22%, signal=25%	ADAM9/CD24/ATP1B1/PTPRK/STAT3/CTNND1/CCDC88A/SDC4/SOX9/TJP2/SQSTM1/TNIP1/IBTK/EZR/VDAC1/FOXO3/TESK1/CDK12/STK39/GATA6/PTPRR/PKP2/GPRC5B/BICD1/TAX1BP1/TCF7L2/PPP1R15A/KIF5B/RB1CC1/CLTC/ERRFI1/TRIB1/LRBA/ATP1A1/SHC2/GOLGA2/HIF1A/NBR1/UTRN/GRB2/JUP/PAK1/EIF3A/CASR/RPS6KA3/PPP1R9A/TRIM27/YWHAZ/GSK3B/GSN/PRKAR1A/MVP/PDLIM5/MARCKS/SLC12A7/PARD6B/MIDN/ACE/NBEAL1/HSP90AB1/DNM2/MAPK8IP3/NBEAL2/HSPB1/TRIM3…
GOBP_MAINTENANCE_OF_LOCATION	GOBP_MAINTENANCE_OF_LOCATION	167	0.406647	1.34909	0.0316901	0.310679	0.283476	2235	tags=36%, list=23%, signal=28%	ERO1A/LCN2/AKAP9/CRP/DDIT3/CCDC88A/SQLE/IBTK/VPS13A/CHD7/HSP90B1/OS9/KDELR1/ARHGAP21/HK2/DIAPH1/GSN/AP3D1/PLA2G10/ZC3H12A/TAF3/VPS13C/ANK3/HNRNPU/NFKBIA/ATP7B/HSPA5/NPSR1/SUN1/PNPLA2/SCIN/VPS13D/CEMIP/TAF8/FKBP1B/GAA/NRIP1/SP100/PDPK1/ABCG1/CALR/PLCG2/YWHAB/TOPORS/SRI/AUP1/PSEN1/PPARG/SLC30A7/TMEM38A/OSBPL11/INSIG2/CAMK2D/LATS1/GOPC/CPT1A/ARL2BP/ASXL2/EHD1/PLIN5
GOBP_CYTOPLASMIC_TRANSLATION	GOBP_CYTOPLASMIC_TRANSLATION	74	-0.417599	-1.46452	0.0322791	0.314722	0.287165	783	tags=31%, list=8%, signal=29%	YBX3/DHX9/RPL32/GSPT1/RPS23/RPL8/EIF3K/RPL35A/RPL15/EIF3L/RPL22L1/EIF4A1/RPL18/RPL36A/RPL10A/RPL26/RPS28/RPL17/RPLP0/RPL11/RPS21/RPL39/RPLP1
GOBP_GASTRULATION	GOBP_GASTRULATION	89	-0.392539	-1.40992	0.0322921	0.314722	0.287165	1003	tags=24%, list=10%, signal=21%	HSBP1/PHLDB1/EYA2/TWSG1/PAF1/WNT5B/PRKACA/ITGB5/AMOT/MYADM/BMP7/TGFBR2/EPHA2/DUSP1/ITGA5/COL6A1/RPS6/COL4A2/FN1/MMP2/SFRP2
GOBP_CATION_TRANSPORT	GOBP_CATION_TRANSPORT	464	0.349377	1.25419	0.0323253	0.314722	0.287165	1922	tags=26%, list=20%, signal=22%	SPINK1/SLC44A4/ERO1A/CP/SLC40A1/FXYD2/ATP1B1/LCN2/AKAP9/AHNAK/SLC4A4/DDIT3/MT-ND5/TCN1/NDUFA4L2/SYT13/CLCN3/KCNE3/SLC9A3R1/IBTK/LGALS3/SLC6A8/ATP6V0A1/SESTD1/SLC22A18/VDAC1/APP/TAF7/SLC6A20/SLC25A37/STK39/PKP2/CHD7/TMEM37/SLC38A1/RAMP1/KIF5B/SLC1A1/CLTC/MICU1/SLC41A2/SEC61A1/ATP1A1/TESC/YME1L1/UTRN/LMTK2/SLC6A14/CASR/SLC9B2/DIAPH1/TRIM27/MLLT6/SLC39A11/ATP5PD/NEDD4L/SLC12A7/KCNK6/ANK3/NDUFS7/GPR3…
GOBP_CELL_PROJECTION_ASSEMBLY	GOBP_CELL_PROJECTION_ASSEMBLY	336	0.364044	1.27698	0.0323625	0.314722	0.287165	2577	tags=33%, list=27%, signal=25%	ONECUT2/SYNE2/AKAP9/FGD4/AHI1/CCDC88A/EPS8L2/SLC9A3R1/PLD1/CD2AP/EZR/ZMYND8/EPS8L3/CSNK1D/TESK1/OCLN/SEPTIN9/DYNC1I2/FGD6/FNBP1L/KLF5/DYNC2H1/TRIP11/ATP8B1/CEP57/DYNC1H1/PPP1R9A/CDC42EP4/GSN/SHTN1/EPS8/IFT172/MAP4/CEP290/PPP2R1A/DNM2/PCM1/PCNT/SCIN/ONECUT1/CEP126/APC/DYNLL2/KIF3B/TNIK/SPAG16/RALA/CCDC57/NUDCD3/FHDC1/FXR1/CEP164/RAB5A/ITGB1/PAFAH1B1/CKAP5/ICAM1/INTU/CDK10/SDCBP/HSP90AA1/ABI2/DCTN1…
GOBP_REGULATION_OF_MICROTUBULE_CYTOSKELETON_ORGANIZATION	GOBP_REGULATION_OF_MICROTUBULE_CYTOSKELETON_ORGANIZATION	85	0.472196	1.44952	0.0325815	0.315575	0.287944	1715	tags=34%, list=18%, signal=28%	TRIM54/AKAP9/GBA2/OCLN/BICD1/CHMP2B/CHMP4C/NUMA1/CLIP1/CLTC/BMERB1/TAOK1/SENP6/PAK1/DYNC1H1/ROCK1/GSK3B/HNRNPU/RASSF7/APC/MAP9/MARK2/CKAP5/PRKAA1/TPR/DCTN1/MAP2/TOGARAM1/HSPA1B
GOBP_SPERM_EGG_RECOGNITION	GOBP_SPERM_EGG_RECOGNITION	20	-0.591357	-1.56982	0.0326004	0.315575	0.287944	1535	tags=45%, list=16%, signal=38%	CCT8/UBAP2L/LY6K/CCT7/CCT4/CCT3/CCT5/B4GALT1/CD9
GOCC_CYTOCHROME_COMPLEX	GOCC_CYTOCHROME_COMPLEX	17	-0.655282	-1.72072	0.0326644	0.315575	0.287944	891	tags=59%, list=9%, signal=54%	MT-CO2/COX5A/COX7B/COX6A1/COA6/UQCRQ/UQCRFS1/UQCR10/MT-CO3/MT-CYB
GOBP_APOPTOTIC_CELL_CLEARANCE	GOBP_APOPTOTIC_CELL_CLEARANCE	18	-0.631954	-1.66089	0.0327109	0.315575	0.287944	900	tags=28%, list=9%, signal=25%	TGM2/TXNDC5/RAC2/ANXA1/THBS1
GOBP_ENERGY_DERIVATION_BY_OXIDATION_OF_ORGANIC_COMPOUNDS	GOBP_ENERGY_DERIVATION_BY_OXIDATION_OF_ORGANIC_COMPOUNDS	177	-0.343406	-1.36685	0.0329949	0.317682	0.289866	1580	tags=38%, list=16%, signal=33%	MT-CO1/ME3/COX4I1/CYCS/GSK3A/NDUFA8/PGM2/SDHB/DGUOK/UQCR11/PINK1/NDUFA2/GHITM/NDUFA9/DLD/SDHD/GPD2/COX8A/IDH3B/SURF1/AIFM2/NNT/NDUFS3/DLST/INPP5K/NDUFS4/PPP1CC/CHCHD2/IRS2/ACADVL/MT-CO2/VCP/NDUFB6/COX5A/PHKG1/SDHA/NDUFA6/BID/NDUFA11/ATP5F1D/NDUFA3/COX7B/NDUFC2/MT-ND1/CISD1/NDUFB4/MT-ND2/MT-ND3/PPP1CB/NDUFA12/NOP53/COX6A1/NDUFS5/ISCU/COA6/SDHC/UQCRQ/UQCRFS1/NDUFB2/UQCR10/PRELID1/NDUFB3/NDUFAB1/NDU…
GOMF_OXIDOREDUCTASE_ACTIVITY_ACTING_ON_PAIRED_DONORS_WITH_INCORPORATION_OR_REDUCTION_OF_MOLECULAR_OXYGEN	GOMF_OXIDOREDUCTASE_ACTIVITY_ACTING_ON_PAIRED_DONORS_WITH_INCORPORATION_OR_REDUCTION_OF_MOLECULAR_OXYGEN	71	0.484545	1.45189	0.0330789	0.317859	0.290027	1629	tags=24%, list=17%, signal=20%	CYP3A5/EGLN3/ASPH/SQLE/P4HB/CYP2S1/PLOD2/CYP2C18/CYP4F3/POR/P4HA1/FMO5/AKR1C3/KDM2A/CYP51A1/MICAL1/TET2
GOBP_RIBOSOMAL_SMALL_SUBUNIT_BIOGENESIS	GOBP_RIBOSOMAL_SMALL_SUBUNIT_BIOGENESIS	56	-0.451789	-1.51644	0.0333621	0.319058	0.291122	433	tags=21%, list=4%, signal=21%	RPS15/TSR3/RPS24/SNU13/RPS7/RPS14/RPS16/RPS27/RPS28/RPS21/RPS6/RPS19
GOBP_ANATOMICAL_STRUCTURE_MATURATION	GOBP_ANATOMICAL_STRUCTURE_MATURATION	91	0.460677	1.43079	0.0333745	0.319058	0.291122	730	tags=13%, list=8%, signal=12%	SPINK1/ABHD2/CFTR/VEGFA/EREG/DEFB1/DDIT3/ZBTB7A/APP/HIF1A/ANG/TUT4
GOBP_MITOCHONDRIAL_MEMBRANE_ORGANIZATION	GOBP_MITOCHONDRIAL_MEMBRANE_ORGANIZATION	106	-0.386587	-1.42511	0.0334566	0.319058	0.291122	1643	tags=40%, list=17%, signal=33%	MT-ATP8/ATP5MC3/TP63/PINK1/YWHAH/GHITM/YWHAQ/BOK/TP53BP2/SAMM50/BAD/ALKBH7/CALM3/BCL2L11/ATP5PO/PMAIP1/EYA2/ATP5F1A/ATP5MC2/RCC1L/BLOC1S2/CNP/MTX2/TOMM22/BID/TIMM8B/TMEM14A/ATP5F1D/MTX1/TIMM10/HEBP2/E2F1/CHCHD10/BAX/ATP5PF/SLC25A5/ATP5MG/ATP5F1E/MT-ATP6/PDCD5/ATP5ME/HSPA1A
GOMF_CLATHRIN_BINDING	GOMF_CLATHRIN_BINDING	41	0.547923	1.49338	0.0334672	0.319058	0.291122	1739	tags=44%, list=18%, signal=36%	CLTA/CLINT1/SYT13/LDLR/HIP1R/CLTC/AP1G2/GAK/PIK3C2A/AP2B1/LRP1/CEMIP/AFTPH/AP2A2/PICALM/EPN2/SMAP1/EPN1
GOCC_MITOCHONDRIAL_LARGE_RIBOSOMAL_SUBUNIT	GOCC_MITOCHONDRIAL_LARGE_RIBOSOMAL_SUBUNIT	51	-0.438206	-1.43832	0.0335661	0.319372	0.291408	1114	tags=25%, list=11%, signal=23%	MRPL40/MRPL34/MRPL9/MRPL57/MRPL27/MRPL33/MRPL55/MRPL24/MRPL43/NDUFAB1/MRPL36/MRPL20/MRPL51
GOBP_MULTICELLULAR_ORGANISM_REPRODUCTION	GOBP_MULTICELLULAR_ORGANISM_REPRODUCTION	317	0.366843	1.27822	0.0338798	0.321725	0.293555	1784	tags=25%, list=18%, signal=21%	SPINK1/ABHD2/TSPAN8/CFTR/ADAM28/EREG/DEFB1/SPP1/ACOX1/SOX9/SRPK1/ATRX/AFF4/APP/TESK1/DIAPH2/BSG/FBXW11/HERC4/TMF1/CEP57/DHX36/UBR2/ARID4A/KDM3A/ANG/MAPK3/TRIM27/TUT4/PRKAR1A/ANKRD49/IGF2R/GOLGA3/YY1/AGFG1/RPS6KB1/GAMT/SETX/ACE/HPGD/SERPINA5/HSPA5/LGR4/SUN1/DNM2/TUT7/PSME4/ASH1L/PGM3/CELF1/PIAS1/SMAD5/SPAG16/CCNI/NRIP1/HOOK1/HDAC2/RAI14/ZNF148/PAFAH1B1/THRB/PLEKHA1/KDM5A/NECTIN3/BCL6/GGNBP2/FOXA3/…
GOBP_REGULATION_OF_EXTRINSIC_APOPTOTIC_SIGNALING_PATHWAY	GOBP_REGULATION_OF_EXTRINSIC_APOPTOTIC_SIGNALING_PATHWAY	94	-0.377109	-1.36021	0.0339899	0.322118	0.293914	542	tags=21%, list=6%, signal=20%	FAF1/SKIL/PMAIP1/EYA2/MCL1/BID/TNFSF12/FYN/PEA15/DEDD2/PRDX2/ITM2C/SNAI2/HMGB2/IGF1/TIMP3/HSPA1A/THBS1/SERPINE1/SFRP2
GOBP_ATP_DEPENDENT_CHROMATIN_REMODELING	GOBP_ATP_DEPENDENT_CHROMATIN_REMODELING	47	0.529995	1.48112	0.0341207	0.322118	0.293914	1932	tags=38%, list=20%, signal=31%	SMARCC2/RSF1/ARID1B/CHD8/SMARCA4/SMARCC1/ZNHIT1/SMARCA1/SMARCA5/SPTY2D1/HNRNPC/PSME4/MIS18BP1/HDAC2/SMARCD2/CENPC/CHD4/RNF8
GOBP_VESICLE_CYTOSKELETAL_TRAFFICKING	GOBP_VESICLE_CYTOSKELETAL_TRAFFICKING	47	0.530015	1.48117	0.0341207	0.322118	0.293914	1659	tags=36%, list=17%, signal=30%	MYO6/TRAK1/FBXW11/FNBP1L/KIF5B/DYNC1H1/CCDC186/AP3D1/BICDL2/MYO7B/TANC2/KIF3B/PAFAH1B1/RAB1A/MAP2/KIF3A/AP3B1
GOBP_ACTIN_POLYMERIZATION_OR_DEPOLYMERIZATION	GOBP_ACTIN_POLYMERIZATION_OR_DEPOLYMERIZATION	132	0.425757	1.37679	0.0342385	0.322601	0.294354	2087	tags=39%, list=21%, signal=31%	SPTBN1/LIMA1/GBA2/ADD3/HIP1R/ARFGEF1/ARHGAP18/BAIAP2L1/SNX9/SPTAN1/GRB2/CORO1B/VILL/ANG/PPP1R9A/DIAPH1/TRIM27/CDC42EP4/MICALL2/GSN/ARPC1A/CFL1/IQGAP2/EPS8/PLEKHH2/ABI1/VIL1/SCIN/ADD1/TTC17/FMN1/ICAM1/AP1AR/BAIAP2L2/ABI2/SWAP70/SPIRE2/MICAL1/CARMIL1/F2RL1/ACTR2/ARHGAP35/SVIL/FER/ARFIP1/CTTN/ACTR3/MTPN/LATS1/SPIRE1/WASL
GOBP_TUBE_MORPHOGENESIS	GOBP_TUBE_MORPHOGENESIS	392	-0.27909	-1.17805	0.0343474	0.322999	0.294717	542	tags=13%, list=6%, signal=13%	TNFSF12/AMOT/CTSH/FGF1/BMP7/TGFBR2/EPHA2/ETS1/LAMA5/ID2/ENG/B4GALT1/BAX/SHC1/PTGIS/PHB2/EPHB3/ITGA5/NAXE/ATP2B4/KLF2/RPS7/EGFL7/ID1/CTNNB1/ADAM15/IRX3/CLIC4/NIBAN2/FKBP10/BTG1/ADAMTS1/VEGFB/AQP1/FLNA/NR4A1/TGFBI/APOD/COL4A2/FN1/COL4A1/MMP2/SERPINF1/ANXA1/CTHRC1/THBS1/SERPINE1/SFRP2/SPARC/DCN
GOBP_SENSORY_ORGAN_MORPHOGENESIS	GOBP_SENSORY_ORGAN_MORPHOGENESIS	98	0.447753	1.40365	0.0345253	0.324042	0.295669	1622	tags=31%, list=17%, signal=26%	SLC44A4/MYO6/VEGFA/AHI1/STAT3/SOX9/SLC9A3R1/PLS1/CHD7/LRIG3/USH1C/SLC1A1/HIPK2/HIF1A/MAPK3/PRKCI/JAG1/IFT172/YY1/CEP290/NIPBL/DVL1/NF1/HDAC2/THRB/INTU/NECTIN3/ABI2/FZD5/TOPORS
GOMF_PHOSPHATASE_BINDING	GOMF_PHOSPHATASE_BINDING	128	0.427137	1.37351	0.0346062	0.324174	0.295789	1914	tags=33%, list=20%, signal=27%	STAT3/SLC9A3R1/LGALS3/STAT6/BOD1L1/JAK1/HSP90B1/PPP1R15A/STAU1/GTF2F1/GRB2/JUP/MAPK3/PPP1R9A/ANKLE2/MVP/RPS6KB1/SYTL2/SMAD3/SHOC2/MAP3K5/STRN3/KAT2A/CTTNBP2NL/SYK/PTK2/SH3YL1/PPP1CA/SH3RF2/PPP2R2A/KIF3A/AP3B1/PPARG/PPP1R11/CTSC/ROS1/FER/PARD3/TERF2IP/SH2D4A/MTMR4/SOD1
GOCC_MICROTUBULE_END	GOCC_MICROTUBULE_END	19	0.652423	1.56823	0.034965	0.326903	0.298279	1892	tags=53%, list=19%, signal=42%	DST/NUMA1/CLIP1/MISP/CLIP2/NCKAP5/CKAP5/DCTN1/SVIL/CDK5RAP2
GOBP_ESTROGEN_METABOLIC_PROCESS	GOBP_ESTROGEN_METABOLIC_PROCESS	16	0.663644	1.54851	0.0353882	0.328533	0.299767	914	tags=38%, list=9%, signal=34%	CYP3A5/HSD17B2/TIPARP/HSD17B11/HSD17B12/SULT1E1
GOBP_REGULATION_OF_PROTEIN_CONTAINING_COMPLEX_DISASSEMBLY	GOBP_REGULATION_OF_PROTEIN_CONTAINING_COMPLEX_DISASSEMBLY	74	0.478305	1.44108	0.0353982	0.328533	0.299767	1615	tags=28%, list=17%, signal=24%	SPTBN1/TRIM54/LIMA1/ADD3/BMERB1/TAOK1/SPTAN1/VILL/GSN/EPS8/SETX/PLEKHH2/VIL1/SCIN/APC/ADD1/IRAK3/SCAF8/SWAP70/CARMIL1/F2RL1
GOBP_MICROTUBULE_ORGANIZING_CENTER_LOCALIZATION	GOBP_MICROTUBULE_ORGANIZING_CENTER_LOCALIZATION	20	0.639616	1.54174	0.0354108	0.328533	0.299767	673	tags=30%, list=7%, signal=28%	SYNE2/AKAP9/EZR/KIF5B/DYNC1LI2/MISP
GOBP_POSITIVE_REGULATION_OF_SODIUM_ION_TRANSPORT	GOBP_POSITIVE_REGULATION_OF_SODIUM_ION_TRANSPORT	20	0.637831	1.53744	0.0354108	0.328533	0.299767	1000	tags=40%, list=10%, signal=36%	FXYD2/ATP1B1/PKP2/KIF5B/TESC/MLLT6/ANK3/DNM2
GOMF_MONOOXYGENASE_ACTIVITY	GOMF_MONOOXYGENASE_ACTIVITY	30	0.584587	1.51276	0.0355191	0.328908	0.300109	1584	tags=33%, list=16%, signal=28%	CYP3A5/SQLE/CYP2S1/CYP2C18/CYP4F3/POR/FMO5/AKR1C3/CYP51A1/MICAL1
GOBP_MITOCHONDRION_ORGANIZATION	GOBP_MITOCHONDRION_ORGANIZATION	393	-0.285344	-1.21398	0.0356109	0.329129	0.30031	1226	tags=25%, list=13%, signal=23%	SURF1/TMEM126B/SAMM50/AIFM2/GABPB1/SAE1/TOMM7/HTRA2/TIMM23/STOML2/COX7A2/HMGCL/NDUFS3/PAM16/PARP1/BAD/ALKBH7/CALM3/NDUFS4/NDUFAF3/UBE2J2/CHCHD2/BCL2L11/RHOU/COA3/GABARAP/TOMM20/TSPO/ATP5PO/PMAIP1/EYA2/HAX1/NDUFB6/SLC25A33/SHARPIN/ATP5F1A/ATP5MC2/BCAP31/RCC1L/BLOC1S2/CNP/PHB/NDUFA6/PLAUR/SSBP1/MTX2/TOMM22/BID/TMEM70/FUNDC2/PLSCR3/TIMM8B/COX14/NDUFA11/GABARAPL2/HIGD2A/TMEM14A/TIMM17B/ATP5F1D/MTX1/N…
GOCC_PROTON_TRANSPORTING_ATP_SYNTHASE_COMPLEX	GOCC_PROTON_TRANSPORTING_ATP_SYNTHASE_COMPLEX	18	-0.619785	-1.6289	0.0357537	0.329819	0.30094	956	tags=56%, list=10%, signal=50%	ATP5PO/ATP5F1A/ATP5MC2/ATP5F1D/ATP5PF/ATP5MG/ATP5F1E/MT-ATP6/ATP5MPL/ATP5ME
GOBP_MICROGLIAL_CELL_ACTIVATION	GOBP_MICROGLIAL_CELL_ACTIVATION	15	0.674826	1.55523	0.0359195	0.330092	0.301189	566	tags=27%, list=6%, signal=25%	CLU/LDLR/APP/GRN
GOMF_ATP_DEPENDENT_MICROTUBULE_MOTOR_ACTIVITY	GOMF_ATP_DEPENDENT_MICROTUBULE_MOTOR_ACTIVITY	14	0.689034	1.55968	0.0359195	0.330092	0.301189	1688	tags=57%, list=17%, signal=47%	KIF5B/DYNC2H1/DYNC1H1/KIF3B/KIF16B/DNAH14/KIF3A/DNAH5
GOBP_REGULATION_OF_PROTEIN_CONTAINING_COMPLEX_ASSEMBLY	GOBP_REGULATION_OF_PROTEIN_CONTAINING_COMPLEX_ASSEMBLY	269	0.371369	1.28366	0.0362637	0.332073	0.302997	2151	tags=30%, list=22%, signal=24%	MMP1/SPTBN1/CLU/VEGFA/RIOK3/AKAP9/GBA2/SOX9/ADD3/LMO4/LGALS3/HIP1R/IMPACT/OCLN/ARFGEF1/ARHGAP18/NUMA1/CLIP1/BAIAP2L1/SNX9/FNIP2/EIF4G1/SPTAN1/SENP6/GRB2/CORO1B/PAK1/VILL/PPP1R9A/TRIM27/CDC42EP4/GSK3B/GSN/FBLIM1/ARPC1A/IQGAP2/EPS8/RPL13A/HSPA5/FNIP1/ATR/VIL1/FARP2/SCIN/PSMC5/DKK1/ADD1/FMN1/ERCC5/SYK/TFRC/CKAP5/ICAM1/AP1AR/PSMC6/BAIAP2L2/HSP90AA1/ABI2/DCTN1/SPIRE2/CARMIL1/MAP2/ACTR2/TOGARAM1/HSPA1B…
GOBP_PROTEIN_FOLDING_IN_ENDOPLASMIC_RETICULUM	GOBP_PROTEIN_FOLDING_IN_ENDOPLASMIC_RETICULUM	11	0.72281	1.57536	0.0362845	0.332073	0.302997	961	tags=45%, list=10%, signal=41%	ERO1A/DNAJC10/HSP90B1/P4HB/HSPA5
GOBP_CELL_CELL_JUNCTION_ASSEMBLY	GOBP_CELL_CELL_JUNCTION_ASSEMBLY	86	0.465435	1.43266	0.0363409	0.332073	0.302997	1326	tags=34%, list=14%, signal=29%	CLDN18/TLN1/CLDN10/CTNND1/AFDN/PATJ/OCLN/PKP2/PKN2/MTDH/PRKCA/CTNNA1/PKP3/JUP/PRKCI/ACTG1/ROCK1/MICALL2/PDCD6IP/PARD6B/ACE/CLDN23/GJB1/CLDN2/APC/MPP5/MARVELD3/CDH6/IKBKB
GOBP_CELLULAR_COPPER_ION_HOMEOSTASIS	GOBP_CELLULAR_COPPER_ION_HOMEOSTASIS	11	-0.706598	-1.67116	0.0365654	0.333496	0.304295	416	tags=27%, list=4%, signal=26%	ARF1/PRNP/MT2A
GOMF_DNA_BINDING_TRANSCRIPTION_ACTIVATOR_ACTIVITY	GOMF_DNA_BINDING_TRANSCRIPTION_ACTIVATOR_ACTIVITY	230	0.386825	1.32164	0.0367075	0.333603	0.304393	2093	tags=24%, list=22%, signal=19%	ONECUT2/CREB3/MECOM/ZNF292/KLF6/SOX4/DDIT3/STAT3/SOX9/PLSCR1/ELF3/ZNF91/STAT6/FOXO3/MEIS2/IRF3/JUN/KLF5/ATF6B/VEZF1/HIF1A/HNF4A/EHF/NFIB/PLAGL1/SMAD3/PLAG1/ONECUT1/PRDM2/CREBRF/NFE2L2/IRF1/CREB3L1/HNF4G/KLF4/CEBPG/PBX2/GRHL2/NFIA/NR1I2/CEBPD/FOXJ3/SMARCD2/MDM4/ATF2/E4F1/ATF5/ATF3/TFCP2/NFIC/SRF/ZNF721/EPAS1/MEF2A/PRDM16
GOMF_MODIFICATION_DEPENDENT_PROTEIN_BINDING	GOMF_MODIFICATION_DEPENDENT_PROTEIN_BINDING	105	0.447563	1.40913	0.0367647	0.333603	0.304393	2493	tags=35%, list=26%, signal=26%	KMT2E/SQSTM1/BPTF/ATRX/TNIP1/BRD4/ZMYND8/TAF7/OPTN/KMT2A/PHIP/CHD8/BAZ2A/SMARCA4/MPHOSPH8/CHD1/PSME4/ATAD2B/CBX4/BRD3/KDM5A/PLCG2/CARM1/DNAJC2/PARP10/BRD2/RRP8/USP15/MLLT3/DZIP3/DNAJB2/ZMYND11/TAB2/DPF2/UIMC1/MTF2/FAAP20
GOCC_GOLGI_LUMEN	GOCC_GOLGI_LUMEN	37	-0.515546	-1.59464	0.0367838	0.333603	0.304393	263	tags=30%, list=3%, signal=29%	WNT5B/MUC13/LRPAP1/MUC21/SDF4/MUC4/MUC5AC/MUC16/BGN/LUM/DCN
GOBP_POSITIVE_REGULATION_OF_MYELOID_LEUKOCYTE_DIFFERENTIATION	GOBP_POSITIVE_REGULATION_OF_MYELOID_LEUKOCYTE_DIFFERENTIATION	24	0.612523	1.53475	0.0368852	0.333898	0.304662	760	tags=33%, list=8%, signal=31%	CA2/ACIN1/PRKCA/JUN/TRIB1/TESC/SLC9B2/HLA-DRB1
GOBP_NEGATIVE_REGULATION_OF_BMP_SIGNALING_PATHWAY	GOBP_NEGATIVE_REGULATION_OF_BMP_SIGNALING_PATHWAY	20	-0.573726	-1.52301	0.0371492	0.33566	0.306269	974	tags=35%, list=10%, signal=32%	SKIL/TWSG1/FSTL3/SPART/BAMBI/NBL1/SFRP2
GOBP_AMINO_ACID_TRANSMEMBRANE_TRANSPORT	GOBP_AMINO_ACID_TRANSMEMBRANE_TRANSPORT	42	0.539584	1.47826	0.0373333	0.336695	0.307214	2276	tags=38%, list=23%, signal=29%	SLC3A1/SLC6A20/SLC38A1/SLC1A1/SLC6A14/ARL6IP1/SLC7A11/SLC38A5/ITGB1/SLC43A1/PSEN1/SLC38A10/SLC25A13/PER2/CLN8/SLC3A2
GOMF_PHOSPHATIDYLINOSITOL_BISPHOSPHATE_BINDING	GOMF_PHOSPHATIDYLINOSITOL_BISPHOSPHATE_BINDING	57	0.502255	1.45146	0.0375648	0.338153	0.308544	1939	tags=39%, list=20%, signal=31%	WDR45B/SESTD1/HIP1R/PLEKHA5/PLEKHA4/OSBPL2/VILL/GSN/SDCBP2/EXOC1/SYTL2/VIL1/SCIN/GSDMD/PICALM/SDCBP/KIF16B/KRIT1/FCHO2/SVIL/PARD3/ADAP1
GOBP_REGULATION_OF_DIGESTIVE_SYSTEM_PROCESS	GOBP_REGULATION_OF_DIGESTIVE_SYSTEM_PROCESS	11	0.721455	1.57241	0.0377358	0.339063	0.309374	358	tags=27%, list=4%, signal=26%	TFF2/HIP1R/STK39
GOBP_GOLGI_TO_PLASMA_MEMBRANE_PROTEIN_TRANSPORT	GOBP_GOLGI_TO_PLASMA_MEMBRANE_PROTEIN_TRANSPORT	29	0.593288	1.53465	0.037889	0.33978	0.310029	1476	tags=38%, list=15%, signal=32%	SPTBN1/GOLGA4/OPTN/MACF1/KRT18/ANK3/AMN/NSF/GGA3/LYPLA1/RAB10
GOBP_POSITIVE_REGULATION_OF_OSTEOBLAST_DIFFERENTIATION	GOBP_POSITIVE_REGULATION_OF_OSTEOBLAST_DIFFERENTIATION	30	-0.520298	-1.53725	0.037956	0.33978	0.310029	483	tags=17%, list=5%, signal=16%	BMP7/IFITM1/IGF1/CTHRC1/SFRP2
GOMF_SOLUTE_CATION_SYMPORTER_ACTIVITY	GOMF_SOLUTE_CATION_SYMPORTER_ACTIVITY	30	0.577601	1.49469	0.0382514	0.341792	0.311865	1834	tags=47%, list=19%, signal=38%	SLC4A4/SLC6A8/SLC6A20/SLC38A1/SLC1A1/SLC12A7/SLC20A2/SLC12A2/SLC15A1/SLC5A3/SLC4A7/SLC28A3/SLC33A1/SLC11A2
GOBP_ENDODERMAL_CELL_DIFFERENTIATION	GOBP_ENDODERMAL_CELL_DIFFERENTIATION	23	-0.561508	-1.54499	0.0383403	0.341956	0.312014	1003	tags=35%, list=10%, signal=31%	HSBP1/PAF1/ITGB5/ITGA5/COL6A1/COL4A2/FN1/MMP2
GOCC_CYTOPLASMIC_DYNEIN_COMPLEX	GOCC_CYTOPLASMIC_DYNEIN_COMPLEX	14	0.687389	1.55595	0.0387931	0.342674	0.312669	1622	tags=57%, list=17%, signal=48%	DYNC1I2/DYNC2H1/DYNC1LI2/DYNC1H1/DYNLL2/NUDCD3/TPR/TOPORS
GOCC_SWI_SNF_SUPERFAMILY_TYPE_COMPLEX	GOCC_SWI_SNF_SUPERFAMILY_TYPE_COMPLEX	60	0.494576	1.44578	0.0388098	0.342674	0.312669	959	tags=23%, list=10%, signal=21%	SMARCC2/RSF1/BPTF/ZBTB7A/ARID1B/CSNK2A1/SMARCA4/SMARCC1/ZNHIT1/SMARCA1/SS18/SMARCA5/YY1/EP400
GOBP_POSITIVE_REGULATION_OF_ION_TRANSPORT	GOBP_POSITIVE_REGULATION_OF_ION_TRANSPORT	340	0.358886	1.2603	0.038835	0.342674	0.312669	1648	tags=26%, list=17%, signal=22%	ADAM9/CFTR/FXYD2/ATP1B1/CA2/AKAP9/SOX4/SPP1/KCNE3/ACHE/CDH1/SLC9A3R1/LGALS3/CD2AP/EZR/TMEM30B/ARHGEF5/OCLN/STK39/PKP2/TCF7L2/KIF5B/AIMP1/TMF1/UBR5/TESC/HIF1A/C1QTNF12/JUP/PAK1/ANG/ARL6IP1/CASR/PRKCI/YWHAZ/MLLT6/GSK3B/MICALL2/PLA2G10/EXOC1/HLA-DRB1/ZC3H12A/PLA2R1/ANK3/NPEPPS/CEP290/NFKBIA/NPSR1/MYO18A/HSP90AB1/DNM2/RAB3B/TCAF1/PCM1/ATP2C2/PCNT/SMAD3/MPC2/LRP1/CEMIP/BRAF/TNFRSF11A/NFE2L2/MCU/SLC12A…
GOBP_POST_GOLGI_VESICLE_MEDIATED_TRANSPORT	GOBP_POST_GOLGI_VESICLE_MEDIATED_TRANSPORT	81	0.469341	1.42745	0.0388471	0.342674	0.312669	1664	tags=32%, list=17%, signal=27%	SPTBN1/GOLGA4/VPS13A/OPTN/MACF1/AP1G2/GAK/KRT18/AP3D1/EXOC1/VPS13C/ANK3/AMN/DNM2/NSF/DOP1A/GGA3/ARFGEF2/LYPLA1/STEAP2/SCFD1/AP1AR/RAB10/KIF16B/VTI1B/CCDC93
GOBP_RESPONSE_TO_HYPEROXIA	GOBP_RESPONSE_TO_HYPEROXIA	15	-0.610662	-1.56609	0.0388686	0.342674	0.312669	1396	tags=47%, list=14%, signal=40%	CDK4/FAS/FOXO1/CDKN1A/MT-ATP6/MT-CYB/COL1A1
GOBP_RESPONSE_TO_ACID_CHEMICAL	GOBP_RESPONSE_TO_ACID_CHEMICAL	68	-0.427589	-1.48776	0.0388982	0.342674	0.312669	605	tags=29%, list=6%, signal=28%	CRLS1/BAD/EDN1/TOMM20/SIPA1/IPO5/AKR1B1/BCL11A/PDGFC/FYN/SOCS1/ATP2B4/KLF2/COL6A1/CAPN2/ASS1/COL4A1/MMP2/COL1A1/COL1A2
GOBP_ORGANIC_ANION_TRANSPORT	GOBP_ORGANIC_ANION_TRANSPORT	144	0.414534	1.35361	0.038961	0.342674	0.312669	2305	tags=35%, list=24%, signal=27%	SLC44A4/SLC3A1/CFTR/CA2/SLC4A4/LLGL2/SLC9A3R1/SLC6A8/SLC6A20/SLC38A1/SLC1A1/SLC35A3/ATP8B1/SLC6A14/ARL6IP1/CASR/PLA2G10/SLC16A1/PLA2R1/SLC7A11/ACE/NCOA2/MPC2/SLC16A4/TNFRSF11A/SLC38A5/SLC12A2/ITGB1/SYK/SLC17A9/SLC16A7/SLC4A7/CA12/PRKAA1/SLC43A1/PSEN1/SLC33A1/SLC25A25/CA9/NR0B2/SLC25A13/PPFIA1/PER2/ABCC3/CLN8/NCOA1/SLC16A3/GLS/SLC3A2/ABCC10
GOBP_NEGATIVE_REGULATION_OF_EXTRINSIC_APOPTOTIC_SIGNALING_PATHWAY	GOBP_NEGATIVE_REGULATION_OF_EXTRINSIC_APOPTOTIC_SIGNALING_PATHWAY	61	-0.436451	-1.51091	0.0389869	0.342674	0.312669	491	tags=16%, list=5%, signal=16%	FYN/PEA15/PRDX2/SNAI2/HMGB2/IGF1/HSPA1A/THBS1/SERPINE1/SFRP2
GOCC_PROTEASOME_CORE_COMPLEX	GOCC_PROTEASOME_CORE_COMPLEX	18	-0.614055	-1.61384	0.0393037	0.343906	0.313793	1658	tags=61%, list=17%, signal=51%	PSMF1/PSMA4/PSMB6/PSMA1/PSMA7/PSMB2/PSMB3/PSMB7/PSMB5/PSMA2/PSMB4
GOBP_TRANSLATIONAL_TERMINATION	GOBP_TRANSLATIONAL_TERMINATION	94	-0.369887	-1.33416	0.0393105	0.343906	0.313793	1114	tags=24%, list=11%, signal=22%	MRPL40/MRPS36/MRPL34/MRPS15/AURKAIP1/MRPL9/MRPS14/MRPS26/MRPL57/GSPT1/EIF5A/MRPL27/MRPL33/MRPL55/CHCHD1/MRPL24/MRPS12/TRMT112/MRPL43/MRPL36/MRPL20/MRPS24/MRPL51
GOBP_POSITIVE_REGULATION_OF_CELLULAR_COMPONENT_BIOGENESIS	GOBP_POSITIVE_REGULATION_OF_CELLULAR_COMPONENT_BIOGENESIS	308	0.365851	1.27373	0.0393873	0.343906	0.313793	2153	tags=31%, list=22%, signal=25%	MMP1/CLU/RESF1/VEGFA/AKAP9/CCDC88A/SDC4/SOX9/EPS8L2/LGALS3/HIP1R/ZMYND8/EPS8L3/ARHGEF5/TESK1/OCLN/MAP4K4/SEPTIN9/NUMA1/CLIP1/PRKCA/FNBP1L/BAIAP2L1/SNX9/FNIP2/EIF4G1/GRB2/CORO1B/PAK1/DYNC1H1/TRIM27/ROCK1/CDC42EP4/GSK3B/GSN/ARPC1A/MPHOSPH8/IQGAP2/EPS8/PDCD6IP/FNIP1/ATR/DNM2/VIL1/SMAD3/SCIN/APC/PSMC5/RALA/FMN1/ERCC5/HGS/SYK/TFRC/CKAP5/ICAM1/AP1AR/SDCBP/BECN1/PSMC6/BAIAP2L2/TPR/HSP90AA1/ABI2/DCTN1/SW…
GOBP_POSITIVE_REGULATION_OF_ERBB_SIGNALING_PATHWAY	GOBP_POSITIVE_REGULATION_OF_ERBB_SIGNALING_PATHWAY	21	0.625506	1.52164	0.0394366	0.343906	0.313793	1580	tags=38%, list=16%, signal=32%	AGR2/EREG/CCDC88A/HBEGF/HIP1R/AREG/RTN4/PTK6
GOBP_PROTEIN_POLYMERIZATION	GOBP_PROTEIN_POLYMERIZATION	177	0.399635	1.33133	0.039489	0.343906	0.313793	2087	tags=36%, list=21%, signal=28%	SPTBN1/AKAP9/GBA2/ADD3/HIP1R/CSNK1D/OCLN/ARFGEF1/ARHGAP18/NUMA1/CLIP1/BAIAP2L1/SNX9/SPTAN1/GOLGA2/GRB2/CORO1B/PAK1/VILL/ANG/PPP1R9A/DIAPH1/TRIM27/CDC42EP4/MICALL2/GSN/MX1/ARPC1A/IQGAP2/EPS8/DNM2/VIL1/SCIN/ZNF207/CCDC57/ADD1/TTC17/FMN1/UBE2K/CKAP5/ICAM1/AP1AR/BAIAP2L2/HSP90AA1/ABI2/DCTN1/SPIRE2/CARMIL1/MAP2/ACTR2/TOGARAM1/HSPA1B/SVIL/FER/ARFIP1/CTTN/CDK5RAP2/DNM1L/ACTR3/MTPN/LATS1/SPIRE1/WASL
GOMF_FLIPPASE_ACTIVITY	GOMF_FLIPPASE_ACTIVITY	10	0.733889	1.56348	0.0395894	0.343906	0.313793	1594	tags=50%, list=16%, signal=42%	TMEM30B/ATP10B/ATP8B1/ATP11A/TMEM30A
GOCC_OXIDOREDUCTASE_COMPLEX	GOCC_OXIDOREDUCTASE_COMPLEX	82	-0.403756	-1.4341	0.0396241	0.343906	0.313793	1559	tags=46%, list=16%, signal=39%	DMAC1/NDUFA2/NDUFA9/DLD/SDHD/GPD2/GCSH/NCF2/NDUFS3/DLST/NDUFS4/BCKDHA/MRPS36/NDUFB6/GMPR/SDHA/NDUFA6/NDUFA11/CYB5B/NDUFA3/NDUFC2/MT-ND1/NDUFB4/MT-ND2/CYB5R3/MT-ND3/NDUFA12/NDUFS5/SDHC/UQCRQ/UQCRFS1/NDUFB2/UQCR10/NDUFB3/NDUFAB1/NDUFS6/NDUFA1/MT-CYB
GOBP_PROTEIN_LOCALIZATION_TO_MICROTUBULE_ORGANIZING_CENTER	GOBP_PROTEIN_LOCALIZATION_TO_MICROTUBULE_ORGANIZING_CENTER	26	0.598637	1.51613	0.0397805	0.344229	0.314088	1791	tags=42%, list=18%, signal=35%	GOLGB1/CSNK1D/BICD1/NUMA1/GSK3B/PCM1/APC/NUDCD3/HOOK3/PIBF1/DCTN2
GOBP_REGULATION_OF_CELL_PROJECTION_ASSEMBLY	GOBP_REGULATION_OF_CELL_PROJECTION_ASSEMBLY	116	0.4348	1.39074	0.039807	0.344229	0.314088	2087	tags=30%, list=21%, signal=24%	SYNE2/CCDC88A/EPS8L2/PLD1/ZMYND8/EPS8L3/TESK1/OCLN/SEPTIN9/FNBP1L/KLF5/ATP8B1/PPP1R9A/CDC42EP4/EPS8/MAP4/DNM2/APC/RALA/FXR1/RAB5A/ICAM1/CDK10/ABI2/F2RL1/ACTR2/ARHGAP35/TGFBR1/PLEKHM1/FER/DCDC2/ACTR3/SRF/MYO10/WASL
GOMF_POLYSACCHARIDE_BINDING	GOMF_POLYSACCHARIDE_BINDING	10	-0.708319	-1.64043	0.0399732	0.344229	0.314088	83	tags=30%, list=1%, signal=30%	ENPP1/REG4/PRG4
GOBP_REGENERATION	GOBP_REGENERATION	94	-0.367718	-1.32634	0.0400738	0.344229	0.314088	772	tags=22%, list=8%, signal=21%	PPP3CA/PHB/LAMB2/CDKN1A/NINJ1/TGFBR2/CERS2/PTPRU/ADAM15/LGR6/UCP2/CD81/MT-CYB/FLNA/LCP1/CXCL12/CCND1/APOD/IGF1/ANXA1/CD9
GOMF_ELECTRON_TRANSFER_ACTIVITY	GOMF_ELECTRON_TRANSFER_ACTIVITY	92	-0.386243	-1.38832	0.0400738	0.344229	0.314088	1549	tags=49%, list=16%, signal=42%	UQCR11/NDUFA2/NDUFA9/SDHD/AKR1A1/COX8A/IDH3B/SURF1/AIFM2/NCF2/COX7A2/NDUFS3/NDUFS4/FDX1/COX11/MT-CO2/NDUFB6/COX5A/SDHA/NDUFA6/AKR7A2/CYB5B/AKR1B1/NDUFA3/COX7B/NDUFC2/MT-ND1/DEGS1/NDUFB4/MT-ND2/MT-ND3/NDUFA12/COX6A1/NDUFS5/SDHC/UQCRQ/UQCRFS1/NDUFB2/UQCR10/NDUFB3/NDUFAB1/NDUFS6/MT-CO3/NDUFA1/MT-CYB
GOBP_STEROL_METABOLIC_PROCESS	GOBP_STEROL_METABOLIC_PROCESS	85	0.462347	1.41929	0.0401003	0.344229	0.314088	2309	tags=35%, list=24%, signal=27%	CFTR/LIMA1/APOL1/GBA2/OSBPL1A/LDLR/SQLE/APP/HDLBP/NPC1/HMGCS1/FMO5/NPC1L1/PRKAA1/CYP51A1/ACLY/ABCG1/CAT/SOD1/NR0B2/INSIG2/MBTPS1/PRKAG2/PRKAA2/DHCR24/FDFT1/CLN8/LPCAT3/ACACA/NFE2L1
GOBP_RESPONSE_TO_ENDOPLASMIC_RETICULUM_STRESS	GOBP_RESPONSE_TO_ENDOPLASMIC_RETICULUM_STRESS	228	0.382449	1.30492	0.0402235	0.344229	0.314088	2677	tags=39%, list=28%, signal=29%	TLN1/ERO1A/CFTR/CLU/CXCL8/CREB3/AGR2/CCDC47/DDIT3/DNAJC10/SEC31A/HSP90B1/OS9/GFPT1/RNF103/P4HB/PPP1R15A/ERN2/JUN/ATF6B/EIF4G1/UBXN4/GSK3B/PDIA4/CUL7/SEL1L/XBP1/HSPA5/TMEM259/CREBRF/TMBIM6/MAP3K5/NFE2L2/UBXN6/ADD1/SGTA/CREB3L1/UBE2K/DERL1/BBC3/PSMC6/DCTN1/UFL1/CALR/TRIM25/AUP1/NRBF2/DNAJB14/EP300/TMEM33/EEF2/RNF139/ATF3/PPP1R15B/TXNDC12/JKAMP/MBTPS1/CASP4/DNAJC3/ECPAS/SELENOS/SEC16A/HYOU1/TARDBP/U…
GOBP_HISTONE_H3_K4_TRIMETHYLATION	GOBP_HISTONE_H3_K4_TRIMETHYLATION	14	0.683628	1.54744	0.0402299	0.344229	0.314088	1646	tags=50%, list=17%, signal=42%	KMT2E/OGT/KMT2A/ARID4A/CTR9/TET2/KMT2D
GOBP_MAMMARY_GLAND_EPITHELIAL_CELL_PROLIFERATION	GOBP_MAMMARY_GLAND_EPITHELIAL_CELL_PROLIFERATION	14	-0.672159	-1.70625	0.0403353	0.34427	0.314125	637	tags=43%, list=7%, signal=40%	ZNF703/EPHA2/ID2/BAX/PHB2/CCND1
GOBP_ESTABLISHMENT_OF_PROTEIN_LOCALIZATION_TO_VACUOLE	GOBP_ESTABLISHMENT_OF_PROTEIN_LOCALIZATION_TO_VACUOLE	36	0.554073	1.47088	0.0403769	0.34427	0.314125	1722	tags=36%, list=18%, signal=30%	CLU/GCC2/VPS13A/AP3D1/VPS13C/VPS13D/SMURF1/GGA3/HGS/VTI1B/RAB7A/AP3B1/VPS41
GOBP_INTRINSIC_APOPTOTIC_SIGNALING_PATHWAY_IN_RESPONSE_TO_DNA_DAMAGE	GOBP_INTRINSIC_APOPTOTIC_SIGNALING_PATHWAY_IN_RESPONSE_TO_DNA_DAMAGE	64	-0.407618	-1.39675	0.0405326	0.344452	0.314292	1605	tags=39%, list=17%, signal=33%	TP63/BCL2L12/KDM1A/PRKDC/BOK/TRIAP1/HTRA2/BAD/BCL2L11/SKIL/MCL1/BID/CDKN1A/TNFRSF1B/EPHA2/E2F1/IFI16/TPT1/BAX/TMEM109/SNAI2/RPS3/RPL26/CXCL12/SFRP2
GOMF_G_PROTEIN_COUPLED_RECEPTOR_BINDING	GOMF_G_PROTEIN_COUPLED_RECEPTOR_BINDING	106	0.446088	1.4031	0.0405405	0.344452	0.314292	395	tags=15%, list=4%, signal=15%	TFF2/CCL20/CXCL5/CXCL8/SAV1/CXCL1/ARHGEF12/CXCL2/DEFB1/CXCL3/SLC9A3R1/CXCL6/SAA1/GPRC5B/JAK1/BICD1
GOBP_REGULATION_OF_CELLULAR_LOCALIZATION	GOBP_REGULATION_OF_CELLULAR_LOCALIZATION	483	0.342166	1.23066	0.0406674	0.344925	0.314723	2066	tags=29%, list=21%, signal=24%	CLDN18/SPTBN1/CFTR/AGR2/GCC2/CCDC88A/WAPL/SQSTM1/CDH1/LGALS3/CD2AP/PLS1/EZR/ZMYND8/TMEM30B/TESK1/CHD7/BICD1/TCF7L2/OS9/NUMB/NUMA1/KIF5B/SLC1A1/CLTC/GNL3/UBR5/CTNNA1/DHX36/HIF1A/C1QTNF12/IWS1/JUP/PAK1/STX7/DYNC1H1/MISP/MAPK3/SLC9B2/PRKCI/DIAPH1/YWHAZ/GSK3B/MICALL2/GSN/HLA-DRB1/SETD2/EPB41L2/ZC3H12A/NEDD4L/ANK3/NPEPPS/HNRNPU/CEP290/SLC7A11/PARD6B/REEP6/NPSR1/HSP90AB1/NIPBL/VIL1/TCAF1/PCM1/UNC13D/PC…
GOCC_STEREOCILIUM_BUNDLE	GOCC_STEREOCILIUM_BUNDLE	24	0.60649	1.51963	0.0409836	0.34648	0.316142	1844	tags=42%, list=19%, signal=34%	EPS8L2/SLC9A3R1/PLS1/USH1C/ATP8B1/VEZT/EPS8/SLC4A7/DCDC2/ESPN
GOMF_PROTEIN_PHOSPHATASE_BINDING	GOMF_PROTEIN_PHOSPHATASE_BINDING	97	0.441801	1.38235	0.0409938	0.34648	0.316142	1914	tags=34%, list=20%, signal=28%	STAT3/LGALS3/STAT6/BOD1L1/JAK1/HSP90B1/PPP1R15A/STAU1/GTF2F1/GRB2/JUP/PPP1R9A/ANKLE2/MVP/RPS6KB1/SHOC2/MAP3K5/STRN3/KAT2A/CTTNBP2NL/PTK2/PPP1CA/SH3RF2/PPP2R2A/KIF3A/AP3B1/PPARG/PPP1R11/ROS1/FER/PARD3/MTMR4/SOD1
GOBP_TRANSITION_METAL_ION_TRANSPORT	GOBP_TRANSITION_METAL_ION_TRANSPORT	68	0.475531	1.41609	0.041184	0.346877	0.316505	2096	tags=41%, list=22%, signal=33%	CP/SLC40A1/LCN2/TCN1/ATP6V0A1/SLC25A37/CLTC/LMTK2/SLC39A11/ATP7B/DNM2/TCIRG1/ATP2C2/TFRC/STEAP2/HEPH/ATP6V1C1/LTF/SLC39A5/SLC30A7/ATP2C1/SLC11A2/ATP6V1H/TMEM165/ATP6V1G1/PGRMC2/SLC31A1/SLC30A9
GOCC_MOTILE_CILIUM	GOCC_MOTILE_CILIUM	68	0.474997	1.4145	0.041184	0.346877	0.316505	1688	tags=34%, list=17%, signal=28%	ABHD2/ATP1B1/STARD10/DEFB1/SQSTM1/SLC9A3R1/VPS13A/DYNC2H1/ATP1A1/HIF1A/SLC9B2/PRKAR1A/IFT172/RNF38/SPAG16/CFAP36/SORD/PAFAH1B1/INTU/DAAM1/GSTM3/OFD1/DNAH5
GOBP_NUCLEOSOME_ORGANIZATION	GOBP_NUCLEOSOME_ORGANIZATION	64	0.488535	1.43987	0.0412903	0.347038	0.316652	2036	tags=41%, list=21%, signal=32%	SMARCC2/SOX9/RSF1/BPTF/ATRX/KAT6B/SMARCA4/SMARCC1/TSPYL1/ZNHIT1/SETD2/SMARCA5/SHPRH/SPTY2D1/PSME4/MIS18BP1/KAT6A/SUPT6H/TSPYL4/ARID2/NAP1L4/SMARCD2/ANP32B/CENPC/RNF8/BRD2
GOBP_CYTOSKELETON_DEPENDENT_CYTOKINESIS	GOBP_CYTOSKELETON_DEPENDENT_CYTOKINESIS	60	0.490168	1.4329	0.0413972	0.347038	0.316652	2086	tags=33%, list=21%, signal=26%	SPTBN1/SON/CHMP2B/CHMP4C/SEPTIN9/SNX9/ROCK1/ANK3/PDCD6IP/CUL7/APC/IST1/MAP9/RTKN/SPIRE2/ACTR2/SEPTIN11/ACTR3/STAMBP/SPIRE1
GOMF_CALCIUM_ION_BINDING	GOMF_CALCIUM_ION_BINDING	270	-0.293625	-1.21867	0.0416684	0.347038	0.316652	681	tags=14%, list=7%, signal=14%	PLSCR3/CALML5/GJB2/PDCD6/CRELD2/SLIT3/VSNL1/NKD1/ESYT2/ACTN4/DSC3/TPT1/EFHD2/CAPNS1/FKBP9/SDF4/EGFL7/NDUFAB1/CAPN2/FKBP10/DSG3/CDH11/PLS3/LTBP2/LCP1/S100A4/ATP2A2/PRNP/EFEMP1/S100A10/SYT8/S100A11/ANXA1/S100A13/THBS1/SPARCL1/FBLN1/SPARC/MGP
GOBP_INTESTINAL_EPITHELIAL_CELL_DIFFERENTIATION	GOBP_INTESTINAL_EPITHELIAL_CELL_DIFFERENTIATION	13	0.690712	1.54235	0.0417266	0.347038	0.316652	614	tags=31%, list=6%, signal=29%	SAV1/GATA6/KLF5/HIF1A
GOBP_OOCYTE_MATURATION	GOBP_OOCYTE_MATURATION	13	0.695771	1.55365	0.0417266	0.347038	0.316652	1016	tags=31%, list=10%, signal=28%	EREG/ANG/TUT4/TUT7
GOMF_VITAMIN_TRANSMEMBRANE_TRANSPORTER_ACTIVITY	GOMF_VITAMIN_TRANSMEMBRANE_TRANSPORTER_ACTIVITY	13	0.691734	1.54464	0.0417266	0.347038	0.316652	241	tags=15%, list=2%, signal=15%	SLC44A4/SLC19A3
GOBP_ICOSANOID_BIOSYNTHETIC_PROCESS	GOBP_ICOSANOID_BIOSYNTHETIC_PROCESS	24	-0.597423	-1.65371	0.0418347	0.347038	0.316652	618	tags=29%, list=6%, signal=27%	EDN2/MGST2/PTGIS/PTGES/PTGDS/ANXA1/FABP5
GOCC_TERTIARY_GRANULE_MEMBRANE	GOCC_TERTIARY_GRANULE_MEMBRANE	35	0.553376	1.46349	0.0418919	0.347038	0.316652	1627	tags=31%, list=17%, signal=26%	CYSTM1/PLD1/CD59/OLR1/COPB1/NBEAL2/ATP11A/GAA/STOM/TMC6/TMEM63A
GOBP_NEGATIVE_REGULATION_OF_MULTICELLULAR_ORGANISMAL_PROCESS	GOBP_NEGATIVE_REGULATION_OF_MULTICELLULAR_ORGANISMAL_PROCESS	445	-0.279558	-1.21694	0.0419483	0.347038	0.316652	785	tags=15%, list=8%, signal=14%	HPN/YBX3/HLA-G/PPP3CA/TMEM176B/GLRX3/PLAUR/LRPAP1/PROCR/TNFRSF1B/PTPN22/NME1/SERPING1/BCL11A/AMOT/BMP7/TGFBR2/LAPTM4B/EPHA2/ADIPOR1/FSTL3/STRAP/ZNF706/RGS2/FKBP1A/SPART/UFD1/PRDX2/PHB2/HLA-F/CERS2/C1QBP/SNAI2/NAXE/PRDX4/SOCS1/ATP2B4/KLF2/ID1/CTNNB1/NIBAN2/RUNX3/ADAMTS1/BST2/NME2/SERPINB2/ATP2A2/B2M/PRNP/RPS19/APOD/IGF1/ARHGDIB/EFEMP1/COL4A2/FN1/TIMP1/SERPINF1/ANXA1/TMSB4X/THBS1/CD9/SERPINE1/SFRP2…
GOBP_EYE_PHOTORECEPTOR_CELL_DIFFERENTIATION	GOBP_EYE_PHOTORECEPTOR_CELL_DIFFERENTIATION	19	0.633582	1.52295	0.041958	0.347038	0.316652	1622	tags=42%, list=17%, signal=35%	VEGFA/STAT3/SOX9/USH1C/PRKCI/CEP290/THRB/TOPORS
GOMF_MONOSACCHARIDE_BINDING	GOMF_MONOSACCHARIDE_BINDING	37	0.547923	1.47418	0.0421053	0.347038	0.316652	2081	tags=35%, list=21%, signal=28%	EGLN3/HKDC1/BSG/PLOD2/HK2/IGF2R/P4HA1/PFKP/GNPNAT1/ALPK1/ALDOB/PFKL/PHYH
GOBP_PROTEIN_HETEROOLIGOMERIZATION	GOBP_PROTEIN_HETEROOLIGOMERIZATION	13	-0.666178	-1.65577	0.0421532	0.347038	0.316652	35	tags=31%, list=0%, signal=31%	PKD1/PKD2/MAT2A/COL1A2
GOBP_REGULATION_OF_HISTONE_MODIFICATION	GOBP_REGULATION_OF_HISTONE_MODIFICATION	92	0.453644	1.40613	0.0421836	0.347038	0.316652	1579	tags=29%, list=16%, signal=25%	VEGFA/KMT2E/ATRX/BRD4/TAF7/NSD3/OGT/KMT2A/UBR5/IWS1/KDM3A/MAPK3/MLLT6/TRIP12/NIPBL/SETD5/ZNF274/RIF1/KAT2A/SNW1/NELFE/OTUB1/SUPT6H/KDM5A/BCL6/MTHFR/CTR9
GOBP_STEROID_METABOLIC_PROCESS	GOBP_STEROID_METABOLIC_PROCESS	163	0.400491	1.32338	0.0423032	0.347038	0.316652	2309	tags=33%, list=24%, signal=26%	CYP3A5/CFTR/SRD5A3/LIMA1/APOL1/GBA2/SPP1/OSBPL1A/LDLR/SQLE/APP/HINT2/HSD17B2/APOC1/HDLBP/ATP1A1/ATP8B1/NPC1/OSBPL2/TIPARP/HSD17B11/FGFR4/SULT1B1/HSD17B12/SULT1E1/HMGCS1/FMO5/REST/NPC1L1/AKR1C3/PLEKHA1/PRKAA1/CYP51A1/ACLY/ABCG1/NR1I2/MED1/CAT/ADM/SOD1/NR0B2/INSIG2/MBTPS1/RDH5/PRKAG2/PRKAA2/DHCR24/OSBPL9/OSBPL7/FDFT1/CLN8/LPCAT3/ACACA/NFE2L1
GOBP_POSITIVE_REGULATION_OF_CELL_MATRIX_ADHESION	GOBP_POSITIVE_REGULATION_OF_CELL_MATRIX_ADHESION	30	0.571067	1.47778	0.0423497	0.347038	0.316652	1314	tags=40%, list=14%, signal=35%	VEGFA/CEACAM6/SDC4/MAP4K4/RRAS/UTRN/JUP/ROCK1/GSK3B/CCL28/SMAD3/FMN1
GOMF_MIRNA_BINDING	GOMF_MIRNA_BINDING	25	0.597278	1.51374	0.0423497	0.347038	0.316652	2326	tags=48%, list=24%, signal=37%	NEAT1/SOX4/DDX21/TUT4/ZC3H12A/TUT7/HNRNPA1/PUM1/PNPT1/RBM4/PUM2/AGO4
GOMF_PHOSPHATIDYLINOSITOL_4_5_BISPHOSPHATE_BINDING	GOMF_PHOSPHATIDYLINOSITOL_4_5_BISPHOSPHATE_BINDING	42	0.537477	1.47249	0.0426667	0.349045	0.318483	1853	tags=43%, list=19%, signal=35%	SESTD1/HIP1R/PLEKHA4/OSBPL2/VILL/GSN/SDCBP2/EXOC1/SYTL2/VIL1/SCIN/GSDMD/PICALM/SDCBP/KRIT1/FCHO2/SVIL/PARD3
GOMF_INTEGRIN_BINDING	GOMF_INTEGRIN_BINDING	69	-0.431817	-1.50212	0.0428922	0.350298	0.319626	712	tags=33%, list=7%, signal=31%	LAMB2/ITGB5/PTPRZ1/FGF1/ADAM10/ACTN4/VCAM1/LAMA5/ITGA5/PPIA/TSPAN4/ADAM15/CD81/TIMP2/LCP1/CXCL12/TGFBI/IGF1/FN1/THBS1/CD9/SFRP2/COL3A1
GOMF_RNA_HELICASE_ACTIVITY	GOMF_RNA_HELICASE_ACTIVITY	61	0.485882	1.42043	0.0430809	0.351247	0.320492	3344	tags=62%, list=34%, signal=41%	EIF4A2/DDX21/DDX42/DDX18/DHX36/DDX39B/DDX27/SNRNP200/DHX16/DDX24/HELZ2/DDX5/DHX40/DHX38/DDX58/SKIV2L/DDX46/DDX23/MTREX/DDX6/DDX10/DHX30/DHX8/DDX50/DDX56/DDX55/DDX17/DDX52/SUPV3L1/DDX60/DDX19A/DDX1/YTHDC2/DHX57/DDX60L/DHX15/DHX29/MOV10
GOBP_REGULATION_OF_BMP_SIGNALING_PATHWAY	GOBP_REGULATION_OF_BMP_SIGNALING_PATHWAY	38	-0.481454	-1.49904	0.0432268	0.351632	0.320843	1084	tags=29%, list=11%, signal=26%	SMAD2/SKIL/HES1/TWSG1/FSTL3/ENG/SPART/BAMBI/NBL1/SFRP4/SFRP2
GOBP_CLATHRIN_COAT_ASSEMBLY	GOBP_CLATHRIN_COAT_ASSEMBLY	11	0.708998	1.54526	0.0435414	0.351632	0.320843	1800	tags=73%, list=19%, signal=59%	CLTA/CLINT1/HIP1R/CLTC/PIK3C2A/AP2B1/PICALM/FCHO2
GOBP_REGULATION_OF_PROTEIN_KINASE_A_SIGNALING	GOBP_REGULATION_OF_PROTEIN_KINASE_A_SIGNALING	11	0.716501	1.56161	0.0435414	0.351632	0.320843	1315	tags=36%, list=14%, signal=31%	TCIM/PRKAR1A/PRKAR2A/PJA2
GOBP_SYNAPTIC_TRANSMISSION_GABAERGIC	GOBP_SYNAPTIC_TRANSMISSION_GABAERGIC	11	0.71704	1.56279	0.0435414	0.351632	0.320843	1062	tags=45%, list=11%, signal=41%	CLCN3/KIF5B/GABRA2/GABRE/KRAS
GOCC_NPBAF_COMPLEX	GOCC_NPBAF_COMPLEX	11	0.713101	1.5542	0.0435414	0.351632	0.320843	846	tags=36%, list=9%, signal=33%	SMARCC2/SMARCA4/SMARCC1/SS18
GOBP_CELLULAR_RESPONSE_TO_CORTICOSTEROID_STIMULUS	GOBP_CELLULAR_RESPONSE_TO_CORTICOSTEROID_STIMULUS	32	-0.495835	-1.47839	0.0436115	0.351632	0.320843	1007	tags=38%, list=10%, signal=34%	BCL2L11/EDN1/FOXO1/GJB2/SGK1/UBE2L3/MT-ND3/FBXO32/AQP1/ASS1/SERPINF1/ANXA1
GOMF_HORMONE_RECEPTOR_BINDING	GOMF_HORMONE_RECEPTOR_BINDING	115	0.433785	1.3849	0.0436364	0.351632	0.320843	2240	tags=37%, list=23%, signal=29%	NCOA7/JMJD1C/TACC1/ZBTB7A/TAF7/JAK1/TCF7L2/TMF1/BAZ2A/HIF1A/FOXP1/SMARCA4/JUP/KDM3A/MED13/TRIP12/THRAP3/TACC2/SMAD3/NCOA2/MED16/PSMC5/PRPF6/LRIF1/DDX5/NRIP1/HMGN3/SNW1/GNAS/PPID/CALR/NR1I2/MED1/PPARG/WBP2/EP300/NR0B2/PKN1/NCOR1/LATS1/SLC30A9/NCOA1/NCOA3
GOBP_REGULATION_OF_SUPRAMOLECULAR_FIBER_ORGANIZATION	GOBP_REGULATION_OF_SUPRAMOLECULAR_FIBER_ORGANIZATION	212	0.38242	1.29907	0.043722	0.351737	0.320939	2087	tags=35%, list=21%, signal=28%	SPTBN1/TRIM54/CLU/AKAP9/LIMA1/GBA2/CCDC88A/SDC4/LDLR/ADD3/HIP1R/APP/ARHGEF5/TESK1/OCLN/ARFGEF1/ARHGAP18/AKAP13/NUMA1/CLIP1/BAIAP2L1/SNX9/BMERB1/TAOK1/SPTAN1/GRB2/CORO1B/PAK1/VILL/PPP1R9A/TRIM27/ACTG1/ROCK1/CDC42EP4/GSN/ARPC1A/IQGAP2/EPS8/PLEKHH2/VIL1/SMAD3/SCIN/APC/ADD1/FMN1/CKAP5/ICAM1/AP1AR/BAIAP2L2/ABI2/DCTN1/SWAP70/SPIRE2/CARMIL1/MAP2/TSC1/F2RL1/ACTR2/ARHGAP35/PSEN1/TOGARAM1/HSPA1B/TGFBR1/SVI…
GOBP_REGULATION_OF_CHROMOSOME_ORGANIZATION	GOBP_REGULATION_OF_CHROMOSOME_ORGANIZATION	174	0.39938	1.33112	0.0440835	0.354057	0.323056	2564	tags=34%, list=26%, signal=25%	RESF1/VEGFA/RAD21/KMT2E/WAPL/ATRX/BRD4/NSD3/OGT/NUMA1/KMT2A/GNL3/NABP2/SENP6/DHX36/SMC5/RAD50/MAPK3/PPP1R10/MPHOSPH8/HNRNPU/SMG1/HNRNPC/ATR/NIPBL/SFPQ/APC/RIF1/ZNF207/KAT2A/SNW1/NELFE/BCL6/BECN1/TCP1/TPR/CHFR/CTR9/HNRNPA1/WBP2/TASOR/TEN1/TERF2IP/RNF20/CDK5RAP2/CCT6A/SDR16C5/ATF7IP/YLPM1/ATM/DYNC1LI1/XRN1/GNL3L/C6orf89/SMG6/MTF2/ANAPC11/PNKP/MNAT1
GOBP_CGMP_MEDIATED_SIGNALING	GOBP_CGMP_MEDIATED_SIGNALING	10	-0.694178	-1.60768	0.0441809	0.354252	0.323233	173	tags=20%, list=2%, signal=20%	AQP1/THBS1
GOBP_NEGATIVE_REGULATION_OF_SUPRAMOLECULAR_FIBER_ORGANIZATION	GOBP_NEGATIVE_REGULATION_OF_SUPRAMOLECULAR_FIBER_ORGANIZATION	83	0.46047	1.40726	0.0448878	0.35847	0.327083	1159	tags=24%, list=12%, signal=21%	SPTBN1/TRIM54/CLU/LIMA1/LDLR/ADD3/HIP1R/ARFGEF1/BMERB1/TAOK1/SPTAN1/CORO1B/VILL/PPP1R9A/GSN/EPS8/PLEKHH2/VIL1/SCIN/APC
GOBP_BASIC_AMINO_ACID_TRANSMEMBRANE_TRANSPORT	GOBP_BASIC_AMINO_ACID_TRANSMEMBRANE_TRANSPORT	11	0.707711	1.54246	0.0449927	0.35847	0.327083	39	tags=9%, list=0%, signal=9%	SLC3A1
GOBP_BASIC_AMINO_ACID_TRANSPORT	GOBP_BASIC_AMINO_ACID_TRANSPORT	11	0.707711	1.54246	0.0449927	0.35847	0.327083	39	tags=9%, list=0%, signal=9%	SLC3A1
GOMF_MOLECULAR_TRANSDUCER_ACTIVITY	GOMF_MOLECULAR_TRANSDUCER_ACTIVITY	258	0.37257	1.28372	0.0450549	0.35847	0.327083	2044	tags=26%, list=21%, signal=21%	PIGR/ABHD2/ERBB3/RRBP1/SCTR/PTPRK/GABRP/TNFRSF11B/ITGB8/TRAM1/ITGA2/ITGB6/SDC4/SEC63/PTPRR/GPRC5B/SEC62/F3/RAMP1/ADGRG6/UNC5CL/NPC1/LY75/GABRA2/CASR/FGFR4/HLA-DRB1/TNFRSF14/IGF2R/PTPRH/PLA2R1/GPR35/HPGD/NPSR1/SLC20A2/LGR4/GABRE/LRP1/IL17RB/GPR160/TNFRSF11A/PLXNB1/ITGB1/TMEM123/DERL1/PVR/ICAM1/ACVR1B/FZD5/TNFRSF10A/F2RL1/TMEM63A/PPARG/TGFBR1/ROS1/RNF139/ANPEP/GPRC5C/PKHD1/INSR/CD44/TRIM5/IL17RE/CR…
GOBP_NUCLEOTIDE_EXCISION_REPAIR_DNA_DUPLEX_UNWINDING	GOBP_NUCLEOTIDE_EXCISION_REPAIR_DNA_DUPLEX_UNWINDING	13	-0.659026	-1.63799	0.0450771	0.35847	0.327083	1143	tags=38%, list=12%, signal=34%	PARP1/CETN2/RPS27A/RBX1/UBC
GOBP_PLATELET_ACTIVATION	GOBP_PLATELET_ACTIVATION	70	-0.405181	-1.41481	0.0453672	0.359325	0.327863	308	tags=13%, list=3%, signal=13%	FYN/ACTB/PPIA/FLNA/FN1/COL1A1/CD9/COL1A2/COL3A1
GOBP_NEGATIVE_REGULATION_OF_RESPONSE_TO_EXTERNAL_STIMULUS	GOBP_NEGATIVE_REGULATION_OF_RESPONSE_TO_EXTERNAL_STIMULUS	159	-0.342798	-1.32916	0.045406	0.359325	0.327863	383	tags=13%, list=4%, signal=13%	IFI16/UFD1/DUSP1/SUSD4/PTGIS/PRDX2/HLA-F/CERS2/C1QBP/PSMB4/CD109/NBL1/SERPINB2/RPS19/CLDN3/IGF1/A2M/SERPINF1/THBS1/CD9/SERPINE1
GOBP_PYRIMIDINE_CONTAINING_COMPOUND_TRANSMEMBRANE_TRANSPORT	GOBP_PYRIMIDINE_CONTAINING_COMPOUND_TRANSMEMBRANE_TRANSPORT	10	0.721967	1.53808	0.0454545	0.359325	0.327863	834	tags=30%, list=9%, signal=27%	SLC44A4/SLC19A3/SLC25A36
GOBP_FORMATION_OF_PRIMARY_GERM_LAYER	GOBP_FORMATION_OF_PRIMARY_GERM_LAYER	56	-0.433193	-1.45402	0.0454889	0.359325	0.327863	872	tags=29%, list=9%, signal=26%	SMAD2/HSBP1/EYA2/TWSG1/PAF1/PRKACA/ITGB5/BMP7/EPHA2/DUSP1/ITGA5/COL6A1/COL4A2/FN1/MMP2/SFRP2
GOBP_GLYCEROLIPID_METABOLIC_PROCESS	GOBP_GLYCEROLIPID_METABOLIC_PROCESS	243	0.374649	1.2833	0.0455556	0.359325	0.327863	2273	tags=28%, list=23%, signal=22%	SLC44A4/ABHD2/MGLL/ETNK1/STARD10/LIPH/INPP4B/LDLR/ACHE/PLD1/PLSCR1/ABHD3/PIK3C2G/APOC1/PLEKHA4/PLBD1/HADHA/LPIN1/CSNK2A1/ANG/AADAC/PLA2G10/EFR3A/PIK3C2A/MTMR11/SMG1/SEL1L/AGPAT1/PIGG/PCK1/PNPLA2/PITPNM1/SERINC1/NAPEPLD/RAB5A/PAFAH1B1/PLEKHA1/SH3YL1/ATG14/PLCG2/GPD1/SERINC2/FAR1/PCYT1A/GK5/SOCS4/CAT/PDGFA/LPIN3/PCK2/PIP4K2C/MTMR4/FAM126A/FAM126B/MOGAT1/FABP6/PLCH2/SELENOI/CPT1A/CEPT1/INPP1/ATM/DDH…
GOMF_LIGAND_GATED_ION_CHANNEL_ACTIVITY	GOMF_LIGAND_GATED_ION_CHANNEL_ACTIVITY	33	0.551811	1.45217	0.0457604	0.360274	0.328728	1345	tags=24%, list=14%, signal=21%	CFTR/GABRP/GABRA2/KCNK6/KCNK1/GABRE/FKBP1B/KCNJ15
GOBP_MESENCHYME_DEVELOPMENT	GOBP_MESENCHYME_DEVELOPMENT	123	-0.348075	-1.29784	0.0458246	0.360274	0.328728	1084	tags=24%, list=11%, signal=21%	SMAD2/TRIM28/EDN1/HES1/PHLDB1/SPRY1/PDCD4/DAB2/HPN/NOLC1/ZNF703/PDCD6/MCRIP1/TGFB1I1/BMP7/TGFBR2/ADIPOR1/STRAP/LAMA5/ENG/SNAI2/CTNNB1/ADAM15/BAMBI/FLNA/S100A4/FN1/COL1A1/SFRP2
GOBP_POSITIVE_REGULATION_OF_POTASSIUM_ION_TRANSMEMBRANE_TRANSPORT	GOBP_POSITIVE_REGULATION_OF_POTASSIUM_ION_TRANSMEMBRANE_TRANSPORT	13	0.683756	1.52682	0.0460432	0.360834	0.329239	102	tags=23%, list=1%, signal=23%	FXYD2/ATP1B1/AKAP9
GOBP_ENDOPLASMIC_RETICULUM_TO_GOLGI_VESICLE_MEDIATED_TRANSPORT	GOBP_ENDOPLASMIC_RETICULUM_TO_GOLGI_VESICLE_MEDIATED_TRANSPORT	145	0.40943	1.33881	0.0460449	0.360834	0.329239	2669	tags=34%, list=27%, signal=25%	SERPINA1/SPTBN1/GOLGB1/SEC31A/CSNK1D/CD59/DYNC1I2/KDELR1/TRIP11/SPTAN1/GOLGA2/DYNC1LI2/DYNC1H1/MIA2/TFG/F5/ANK3/COPG1/COPB1/AREG/NSF/ARFGAP3/DYNLL2/SCFD1/RAB1A/DCTN1/VTI1B/USO1/YIPF5/CTSC/DCTN2/RNF139/TMED3/ARCN1/SEC16A/HYOU1/GOPC/COPB2/DYNC1LI1/PPP6R1/SEC23A/TRAPPC9/NAPA/STX18/CAPZB/STX17/COG6/COPA/GOSR2
GOBP_RESPONSE_TO_X_RAY	GOBP_RESPONSE_TO_X_RAY	18	-0.600904	-1.57928	0.0464036	0.362475	0.330737	110	tags=28%, list=1%, signal=28%	XRCC6/CDKN1A/CCND1/ANXA1/SFRP2
GOBP_REGULATION_OF_OSTEOCLAST_DIFFERENTIATION	GOBP_REGULATION_OF_OSTEOCLAST_DIFFERENTIATION	24	0.602634	1.50997	0.0464481	0.362475	0.330737	79	tags=8%, list=1%, signal=8%	CLDN18/CA2
GOBP_REGULATION_OF_POTASSIUM_ION_TRANSMEMBRANE_TRANSPORTER_ACTIVITY	GOBP_REGULATION_OF_POTASSIUM_ION_TRANSMEMBRANE_TRANSPORTER_ACTIVITY	21	0.621844	1.51273	0.0464789	0.362475	0.330737	1000	tags=38%, list=10%, signal=34%	FXYD2/ATP1B1/AKAP9/KCNE3/STK39/NEDD4L/ANK3/DNM2
GOCC_SWI_SNF_COMPLEX	GOCC_SWI_SNF_COMPLEX	16	0.643571	1.50167	0.0470756	0.366501	0.33441	846	tags=31%, list=9%, signal=29%	SMARCC2/ARID1B/SMARCA4/SMARCC1/SS18
GOCC_ENDOPLASMIC_RETICULUM_GOLGI_INTERMEDIATE_COMPARTMENT	GOCC_ENDOPLASMIC_RETICULUM_GOLGI_INTERMEDIATE_COMPARTMENT	92	0.450542	1.39652	0.0471464	0.366501	0.33441	2233	tags=36%, list=23%, signal=28%	SERPINA1/VMP1/GOLGB1/CSNK1D/CD59/P4HB/KDELR1/TRIP11/GOLGA2/PRRG4/RAB2A/F5/COPG1/COPB1/TAP2/AREG/HSPA5/MYO18A/DICER1/IST1/MPP5/GNPNAT1/CALR/CTSC/ANPEP/TMED3/ECPAS/PROM1/UGGT2/MAN1A1/DDHD2/CLN8/NUCB2
GOBP_MYELOID_LEUKOCYTE_CYTOKINE_PRODUCTION	GOBP_MYELOID_LEUKOCYTE_CYTOKINE_PRODUCTION	14	0.6746	1.527	0.0474138	0.367848	0.335639	1472	tags=50%, list=15%, signal=42%	DDX21/GPRC5B/DHX36/BCL10/IRAK3/DDX58/BCL6
GOBP_NEGATIVE_REGULATION_OF_WOUND_HEALING	GOBP_NEGATIVE_REGULATION_OF_WOUND_HEALING	34	-0.495303	-1.51953	0.0474716	0.367848	0.335639	144	tags=24%, list=1%, signal=23%	PLAUR/SERPING1/CD109/SERPINB2/CLDN3/THBS1/CD9/SERPINE1
GOBP_NEGATIVE_REGULATION_OF_IMMUNE_SYSTEM_PROCESS	GOBP_NEGATIVE_REGULATION_OF_IMMUNE_SYSTEM_PROCESS	166	-0.338412	-1.33319	0.047709	0.368414	0.336156	613	tags=16%, list=6%, signal=16%	PHPT1/PTPN22/NME1/SERPING1/FSTL3/IFI16/UFD1/DUSP1/SUSD4/PRDX2/HLA-F/C1QBP/SOCS1/RUNX3/BST2/PSMB4/NME2/NBL1/CXCL12/PRNP/RPS19/APOD/A2M/ANXA1/THBS1/TSC22D3/COL3A1
GOBP_POSITIVE_REGULATION_OF_ACTIN_FILAMENT_POLYMERIZATION	GOBP_POSITIVE_REGULATION_OF_ACTIN_FILAMENT_POLYMERIZATION	64	0.480011	1.41475	0.0477419	0.368414	0.336156	2151	tags=42%, list=22%, signal=33%	HIP1R/BAIAP2L1/SNX9/GRB2/CORO1B/TRIM27/CDC42EP4/GSN/ARPC1A/IQGAP2/VIL1/SCIN/FMN1/ICAM1/AP1AR/BAIAP2L2/ABI2/SPIRE2/CARMIL1/ACTR2/FER/ARFIP1/CTTN/ACTR3/SPIRE1/WASL/DLG1
GOBP_REGULATION_OF_RNA_SPLICING	GOBP_REGULATION_OF_RNA_SPLICING	106	0.435472	1.36971	0.0479115	0.368414	0.336156	2252	tags=40%, list=23%, signal=31%	RPS26/AHNAK2/SON/AHNAK/SRPK1/ZBTB7A/CDK12/FUS/RBM25/RBM39/ESRP1/YTHDC1/MBNL2/RPS13/NCL/TIA1/HNRNPU/NSRP1/SETX/RBM5/THRAP3/MBNL1/TMBIM6/REST/TRA2B/CELF1/DDX5/FXR1/SNW1/SLC39A5/HNRNPA1/LARP7/TRA2A/ESRP2/SFSWAP/CLK1/RNPS1/RBM4/SRSF10/SRPK2/RBM12B/SF1
GOCC_AZUROPHIL_GRANULE	GOCC_AZUROPHIL_GRANULE	102	0.436826	1.37091	0.0479115	0.368414	0.336156	1684	tags=28%, list=17%, signal=24%	SERPINA3/PIGR/LYZ/PA2G4/PRSS2/CEACAM6/RNASET2/VNN1/GRN/ANXA11/PLAC8/STX7/DYNC1H1/SERPINB3/FUCA2/FRK/UNC13D/IST1/GAA/DNAJC13/GLB1/SDCBP/CD63/STOM/ACLY/PSMD1/TMEM30A/ACTR2/PSEN1
GOBP_BRANCHING_INVOLVED_IN_BLOOD_VESSEL_MORPHOGENESIS	GOBP_BRANCHING_INVOLVED_IN_BLOOD_VESSEL_MORPHOGENESIS	18	-0.599999	-1.5769	0.047925	0.368414	0.336156	479	tags=28%, list=5%, signal=26%	TGFBR2/ENG/CTNNB1/COL4A1/SFRP2
GOCC_CYTOPLASMIC_MICROTUBULE	GOCC_CYTOPLASMIC_MICROTUBULE	41	0.532773	1.45209	0.0481928	0.369619	0.337256	1399	tags=37%, list=14%, signal=31%	SCTR/SAA1/FBXW11/BICD1/ARHGAP18/NUMA1/HID1/DYNC1H1/MISP/APC/BCL10/ARFGEF2/MAP9/FHDC1/PAFAH1B1
GOCC_PERINUCLEAR_REGION_OF_CYTOPLASM	GOCC_PERINUCLEAR_REGION_OF_CYTOPLASM	446	0.342218	1.22351	0.0483193	0.369619	0.337256	1728	tags=27%, list=18%, signal=23%	OLFM4/ANXA4/NDRG1/CLU/GALNT4/MYO6/UPF2/EIF4A2/TPD52/SPP1/ITGA2/CLINT1/RASEF/GALNT3/PATJ/ACHE/BPTF/CDH1/SEC31A/SLC9A3R1/PLD1/PLSCR1/ATP6V0A1/SH3RF1/MAP7/CD2AP/HIP1R/RNF128/EZR/APP/CSNK1D/TESK1/OPTN/ARFGEF1/MEIS2/PTPRR/PLEC/HSP90B1/BICD1/LAMC2/AKAP13/SEPTIN9/PKN2/MTDH/PRKCA/KIF5B/UBR5/NPC1/TAOK1/LMTK2/GBP2/CPEB4/CORO1B/STX7/GAK/KRT18/CCAR1/GSN/MX1/EXOC1/PRKACB/SHTN1/IGF2R/IFITM3/MVP/CUL7/RPS6KB1/CL…
GOBP_MYELIN_MAINTENANCE	GOBP_MYELIN_MAINTENANCE	10	0.711794	1.51641	0.0483871	0.369619	0.337256	1350	tags=50%, list=14%, signal=43%	NDRG1/CLU/MYRF/MPP5/FA2H
GOCC_TRANS_GOLGI_NETWORK_TRANSPORT_VESICLE_MEMBRANE	GOCC_TRANS_GOLGI_NETWORK_TRANSPORT_VESICLE_MEMBRANE	10	0.71497	1.52318	0.0483871	0.369619	0.337256	1298	tags=50%, list=13%, signal=43%	CLTA/CLTC/AP1G2/SYNRG/AFTPH
GOCC_CELL_CELL_CONTACT_ZONE	GOCC_CELL_CELL_CONTACT_ZONE	34	0.549437	1.45117	0.0485175	0.369908	0.337519	875	tags=29%, list=9%, signal=27%	ATP1B1/AHNAK/AFDN/TJP2/PKP2/ATP1A1/CTNNA1/JUP/PAK1/ANK3
GOBP_COLLAGEN_METABOLIC_PROCESS	GOBP_COLLAGEN_METABOLIC_PROCESS	43	-0.474715	-1.51556	0.0485777	0.369908	0.337519	382	tags=23%, list=4%, signal=22%	ENG/MMP7/ADAM15/CTSL/CTSB/SERPINH1/MMP2/COL1A1/COL1A2/VIM
GOBP_TISSUE_MIGRATION	GOBP_TISSUE_MIGRATION	163	-0.329042	-1.28609	0.0490489	0.37291	0.340258	628	tags=15%, list=6%, signal=14%	GIPC1/PDCD6/TNFSF12/AMOT/CTSH/FGF1/TGFBR2/EPHA2/ADIPOR1/RAB25/STRAP/ETS1/PFN1/ATP2B4/ID1/RAB13/NR4A1/SERPINF1/ANXA1/TMSB4X/THBS1/SPARC/KRT16/DCN
GOBP_POSITIVE_REGULATION_OF_BONE_RESORPTION	GOBP_POSITIVE_REGULATION_OF_BONE_RESORPTION	11	0.701979	1.52996	0.0493469	0.37449	0.3417	1778	tags=64%, list=18%, signal=52%	CA2/SPP1/PRKCA/TNFRSF11A/SYK/TFRC/PLEKHM1
GOBP_COPPER_ION_HOMEOSTASIS	GOBP_COPPER_ION_HOMEOSTASIS	13	-0.648537	-1.61192	0.0494629	0.37449	0.3417	885	tags=38%, list=9%, signal=35%	ATOX1/COMMD1/ARF1/PRNP/MT2A
GOBP_EMBRYONIC_FORELIMB_MORPHOGENESIS	GOBP_EMBRYONIC_FORELIMB_MORPHOGENESIS	12	-0.66531	-1.5948	0.0496246	0.37449	0.3417	17	tags=58%, list=0%, signal=58%	ZNF358/EN1/LNPK/MSX1/CACNA1C/TP63/CRABP2
GOCC_GOLGI_ASSOCIATED_VESICLE_MEMBRANE	GOCC_GOLGI_ASSOCIATED_VESICLE_MEMBRANE	33	0.54802	1.44219	0.0497981	0.37449	0.3417	915	tags=27%, list=9%, signal=25%	CFTR/CLTA/CLTC/KDELR1/AP1G2/SPPL2B/SYNRG/COPG1/COPB1
GOBP_RETROGRADE_AXONAL_TRANSPORT	GOBP_RETROGRADE_AXONAL_TRANSPORT	10	0.708143	1.50863	0.0498534	0.37449	0.3417	1914	tags=60%, list=20%, signal=48%	DST/FBXW11/KIF5B/DYNC1H1/PAFAH1B1/SOD1
GOBP_SINGLE_STRANDED_VIRAL_RNA_REPLICATION_VIA_DOUBLE_STRANDED_DNA_INTERMEDIATE	GOBP_SINGLE_STRANDED_VIRAL_RNA_REPLICATION_VIA_DOUBLE_STRANDED_DNA_INTERMEDIATE	10	0.70811	1.50856	0.0498534	0.37449	0.3417	788	tags=30%, list=8%, signal=28%	CXCL8/RESF1/MPHOSPH8
GOMF_EXTRACELLULAR_LIGAND_GATED_ION_CHANNEL_ACTIVITY	GOMF_EXTRACELLULAR_LIGAND_GATED_ION_CHANNEL_ACTIVITY	10	0.707602	1.50748	0.0498534	0.37449	0.3417	1006	tags=30%, list=10%, signal=27%	GABRP/GABRA2/GABRE
GOBP_VESICLE_BUDDING_FROM_MEMBRANE	GOBP_VESICLE_BUDDING_FROM_MEMBRANE	83	0.456019	1.39366	0.0498753	0.37449	0.3417	1779	tags=29%, list=18%, signal=24%	SERPINA1/SEC31A/CSNK1D/CHMP4C/CD59/FNBP1L/GOLGA2/PRKCI/AP3D1/MX1/TFG/F5/AREG/MYO18A/DNM2/NSF/ARFGAP3/SCFD1/PICALM/RAB1A/RAB7A/AP3B1/USO1/CTSC

## Sheet: KEGG
ID	Description	setSize	enrichmentScore	NES	pvalue	p.adjust	qvalues	rank	leading_edge	core_enrichment
KEGG_RIBOSOME	KEGG_RIBOSOME	56	-0.749305	-2.4418	4.93344e-08	8.14018e-06	7.58192e-06	433	tags=68%, list=4%, signal=65%	RPS24/RPS23/RPL8/RSL24D1/RPL35A/RPL15/RPL22L1/RPL23A/RPS7/RPL18/RPS3/RPS4Y1/RPS27A/RPS18/RPS16/RPL36A/RPL5/RPL10A/RPS27/RPL26/RPS28/RPL37A/RPL10/RPS15A/RPL17/RPLP0/RPL11/RPS21/RPL21/RPL39/RPS3A/RPL7A/RPL3/RPS6/RPL37/RPS19/RPLP1/RPS4X
KEGG_ALZHEIMERS_DISEASE	KEGG_ALZHEIMERS_DISEASE	111	-0.491301	-1.78151	0.000573417	0.0356962	0.0332482	1752	tags=54%, list=18%, signal=45%	COX4I1/CYCS/NDUFA8/CACNA1C/MT-ATP8/SDHB/ATP5MC3/UQCR11/NDUFA2/NDUFA9/SDHD/CASP7/CHP1/COX8A/FAS/COX7A2/NDUFS3/BAD/CALM3/NDUFS4/ATP5PO/MT-CO2/NDUFB6/COX5A/SDHA/ATP5F1A/ATP5MC2/PPP3CA/NDUFA6/BID/CALML5/ATP5F1D/NDUFA3/HSD17B10/COX7B/NDUFC2/APH1A/ADAM10/NDUFB4/COX6A1/NDUFS5/SDHC/NCSTN/PSENEN/UQCRQ/GAPDH/UQCRFS1/NDUFB2/UQCR10/ATP5PF/NDUFB3/ATP5F1E/MT-ATP6/NDUFAB1/NDUFS6/MT-CO3/CAPN2/NDUFA1/MT-CYB/ATP2A2
KEGG_P53_SIGNALING_PATHWAY	KEGG_P53_SIGNALING_PATHWAY	43	-0.606444	-1.90614	0.000649022	0.0356962	0.0332482	704	tags=40%, list=7%, signal=37%	CDK4/EI24/FAS/CD82/ZMAT3/PMAIP1/BID/CDKN1A/BAX/GADD45B/CCND1/IGF1/CDKN2A/IGFBP3/SERPINB5/THBS1/SERPINE1
KEGG_OXIDATIVE_PHOSPHORYLATION	KEGG_OXIDATIVE_PHOSPHORYLATION	97	-0.488287	-1.749	0.00212087	0.0736679	0.0686157	956	tags=54%, list=10%, signal=49%	MT-ATP8/SDHB/ATP5MC3/UQCR11/NDUFA2/NDUFA9/PPA1/SDHD/COX8A/ATP6V0E1/COX7A2/NDUFS3/NDUFS4/ATP5PO/COX11/MT-CO2/NDUFB6/COX5A/SDHA/ATP5F1A/ATP5MC2/NDUFA6/NDUFA11/ATP5F1D/NDUFA3/COX7B/NDUFC2/MT-ND1/NDUFB4/MT-ND2/COX17/MT-ND3/COX6A1/NDUFS5/SDHC/UQCRQ/UQCRFS1/NDUFB2/UQCR10/ATP5PF/ATP5MG/NDUFB3/ATP6V1F/ATP5F1E/ATP6V0B/MT-ATP6/NDUFAB1/NDUFS6/MT-CO3/NDUFA1/ATP5ME/MT-CYB
KEGG_PARKINSONS_DISEASE	KEGG_PARKINSONS_DISEASE	93	-0.473698	-1.68559	0.00243191	0.0736679	0.0686157	1804	tags=59%, list=19%, signal=49%	MT-CO1/VDAC2/COX4I1/CYCS/NDUFA8/UBE2G1/MT-ATP8/SDHB/ATP5MC3/UQCR11/PINK1/NDUFA2/NDUFA9/SDHD/COX8A/HTRA2/COX7A2/NDUFS3/NDUFS4/UBE2J2/ATP5PO/UBA1/MT-CO2/NDUFB6/COX5A/SDHA/ATP5F1A/ATP5MC2/NDUFA6/ATP5F1D/NDUFA3/COX7B/NDUFC2/MT-ND1/UBE2L3/NDUFB4/MT-ND2/MT-ND3/COX6A1/NDUFS5/SDHC/UQCRQ/UQCRFS1/NDUFB2/UQCR10/ATP5PF/SLC25A5/NDUFB3/ATP5F1E/MT-ATP6/NDUFAB1/NDUFS6/MT-CO3/NDUFA1/MT-CYB
KEGG_NOD_LIKE_RECEPTOR_SIGNALING_PATHWAY	KEGG_NOD_LIKE_RECEPTOR_SIGNALING_PATHWAY	35	0.644091	1.70639	0.00267883	0.0736679	0.0686157	987	tags=31%, list=10%, signal=28%	BIRC3/CXCL8/CXCL1/CXCL2/HSP90B1/ERBIN/IL18/XIAP/MAPK3/NFKBIA/HSP90AB1
KEGG_TIGHT_JUNCTION	KEGG_TIGHT_JUNCTION	78	0.534524	1.62313	0.00322565	0.0760333	0.0708189	1299	tags=36%, list=13%, signal=31%	CLDN18/CLDN10/LLGL2/AFDN/TJP2/PATJ/CGN/OCLN/PRKCA/MYH14/SPTAN1/CTNNA1/RRAS/CSNK2A1/PRKCI/ACTG1/EPB41L2/MAGI1/MAGI3/PPP2R1A/PARD6B/CLDN23/RAB3B/KRAS/ASH1L/CLDN2/EPB41/MYH9
KEGG_O_GLYCAN_BIOSYNTHESIS	KEGG_O_GLYCAN_BIOSYNTHESIS	18	0.69752	1.6671	0.00605132	0.121938	0.113575	1281	tags=44%, list=13%, signal=39%	GALNT4/ST3GAL1/GCNT3/GALNT3/GALNT7/ST6GALNAC1/GALNT5/GALNT6
KEGG_CHEMOKINE_SIGNALING_PATHWAY	KEGG_CHEMOKINE_SIGNALING_PATHWAY	93	0.488304	1.50531	0.00665115	0.121938	0.113575	1153	tags=23%, list=12%, signal=20%	CCL20/CXCL5/CXCL8/CXCL1/CXCL2/STAT3/CXCL3/CXCL6/FOXO3/SHC2/GRB2/PAK1/MAPK3/ROCK1/GSK3B/PRKACB/NFKBIA/CCL28/KRAS/GNG12/BRAF
KEGG_TGF_BETA_SIGNALING_PATHWAY	KEGG_TGF_BETA_SIGNALING_PATHWAY	45	-0.550017	-1.75948	0.0101548	0.167554	0.156063	531	tags=20%, list=5%, signal=19%	SKP1/BMP7/TGFBR2/ID2/ID1/RBX1/THBS1/ID3/DCN
KEGG_CELL_ADHESION_MOLECULES_CAMS	KEGG_CELL_ADHESION_MOLECULES_CAMS	50	0.543716	1.53325	0.0115936	0.173905	0.161978	1461	tags=34%, list=15%, signal=29%	CLDN18/ITGB8/CLDN10/SDC4/CDH1/OCLN/HLA-E/HLA-B/HLA-DRB1/HLA-A/CLDN23/HLA-DRB5/CLDN2/ITGB1/PVR/ICAM1/NECTIN3
KEGG_FOCAL_ADHESION	KEGG_FOCAL_ADHESION	117	-0.390609	-1.42884	0.0132558	0.182267	0.169767	730	tags=25%, list=8%, signal=23%	IGF1R/PXN/LAMB2/ITGB5/VASP/RAC2/LAMC1/PDGFC/FYN/ACTN4/PPP1CB/LAMA5/SHC1/ACTB/ITGA5/COL6A1/CTNNB1/CAPN2/VEGFB/FLNA/CCND1/IGF1/COL4A2/FN1/COL4A1/THBS1/COL1A1/COL1A2/COL3A1
KEGG_NEUROACTIVE_LIGAND_RECEPTOR_INTERACTION	KEGG_NEUROACTIVE_LIGAND_RECEPTOR_INTERACTION	38	0.568096	1.52432	0.015842	0.201072	0.187282	1853	tags=29%, list=19%, signal=24%	SCTR/GABRP/PRSS1/PRSS2/GABRA2/GPR35/GABRE/PRSS3/THRB/F2RL1/PARD3
KEGG_ECM_RECEPTOR_INTERACTION	KEGG_ECM_RECEPTOR_INTERACTION	34	-0.570379	-1.6753	0.0191524	0.225725	0.210244	712	tags=38%, list=7%, signal=36%	LAMB2/ITGB5/LAMC1/LAMA5/ITGA5/COL6A1/COL4A2/FN1/COL4A1/THBS1/COL1A1/COL1A2/COL3A1
KEGG_ENDOCYTOSIS	KEGG_ENDOCYTOSIS	124	0.449789	1.4378	0.0219256	0.233135	0.217146	1967	tags=32%, list=20%, signal=26%	RAB11FIP1/ERBB3/CLTA/LDLR/PLD1/CHMP2B/CHMP4C/CLTC/HLA-E/HLA-B/PRKCI/FGFR4/RAB5B/HLA-A/NEDD4L/WWP1/PDCD6IP/PARD6B/DNM2/PSD4/AP2B1/ARFGAP3/SMURF1/EEA1/RNF41/AP2A2/HGS/RAB5A/TFRC/ACAP2/EPN2/ITCH/SMAP1/HSPA1B/VTA1/EPN1/PARD3/DNM1L/RAB11FIP2/STAMBP
KEGG_STEROID_HORMONE_BIOSYNTHESIS	KEGG_STEROID_HORMONE_BIOSYNTHESIS	13	0.703293	1.57624	0.022607	0.233135	0.217146	1362	tags=54%, list=14%, signal=46%	CYP3A5/SRD5A3/HSD17B2/UGT2A3/HSD17B12/SULT1E1/AKR1C3
KEGG_PROXIMAL_TUBULE_BICARBONATE_RECLAMATION	KEGG_PROXIMAL_TUBULE_BICARBONATE_RECLAMATION	13	0.695933	1.55974	0.0274356	0.266286	0.248024	1024	tags=46%, list=11%, signal=41%	FXYD2/ATP1B1/CA2/SLC4A4/ATP1A1/PCK1
KEGG_PRION_DISEASES	KEGG_PRION_DISEASES	20	-0.616126	-1.66062	0.0387079	0.354823	0.330489	1137	tags=50%, list=12%, signal=44%	MAP2K1/ELK1/PRKACA/MAP2K2/LAMC1/FYN/BAX/PRNP/C7/HSPA1A
KEGG_MELANOMA	KEGG_MELANOMA	40	-0.483127	-1.48704	0.0481831	0.415698	0.387189	1176	tags=40%, list=12%, signal=35%	EGFR/CDK4/PIK3R3/HRAS/MAP2K1/BAD/RB1/IGF1R/CDKN1A/MAP2K2/PDGFC/FGF1/E2F1/CCND1/IGF1/CDKN2A

## Sheet: Hallmark
ID	Description	setSize	enrichmentScore	NES	pvalue	p.adjust	qvalues	rank	leading_edge	core_enrichment
HALLMARK_EPITHELIAL_MESENCHYMAL_TRANSITION	HALLMARK_EPITHELIAL_MESENCHYMAL_TRANSITION	107	-0.572082	-2.0636	2.20753e-06	0.000110377	8.83013e-05	458	tags=36%, list=5%, signal=34%	SLIT3/MXRA5/LAMC1/VCAM1/COLGALT1/FSTL3/ID2/SNAI2/ITGA5/GADD45B/ELN/CDH11/FLNA/SERPINH1/CXCL12/TGFBI/SFRP4/COL4A2/FN1/TIMP1/IGFBP3/TIMP3/COL4A1/MMP2/CTHRC1/THBS1/COL1A1/SERPINE1/COL1A2/FBLN1/BGN/SPARC/VIM/COL3A1/TAGLN/LUM/DCN/MGP
HALLMARK_MITOTIC_SPINDLE	HALLMARK_MITOTIC_SPINDLE	140	0.508978	1.65546	0.000411018	0.00987472	0.00789977	2174	tags=42%, list=22%, signal=33%	SPTBN1/DST/FGD4/ARHGEF12/CCDC88A/CD2AP/EZR/CSNK1D/ARFGEF1/AKAP13/SEPTIN9/NUMA1/CLIP1/FGD6/KIF5B/STAU1/SPTAN1/CEP57/DYNC1H1/ROCK1/CDC42EP4/ARHGDIA/GSN/RFC1/EPB41L2/PDLIM5/MARCKS/ABI1/ARHGAP29/PCM1/PCNT/NF1/ARHGAP5/CLIP2/APC/DYNLL2/KIF3B/SHROOM1/EPB41/PPP4R2/MYH9/SORBS2/PAFAH1B1/CKAP5/STK38L/HOOK3/CDC42BPA/LRPPRC/TSC1/RAPGEF5/CTTN/CDK5RAP2/MAP3K11/TAOK2/LATS1/WASL/TLK1/DLG1/TRIO
HALLMARK_OXIDATIVE_PHOSPHORYLATION	HALLMARK_OXIDATIVE_PHOSPHORYLATION	169	-0.420021	-1.60223	0.000738007	0.00987472	0.00789977	1631	tags=44%, list=17%, signal=38%	SDHB/ATP5MC3/LDHB/UQCR11/NDUFA2/NDUFA9/DLD/SDHD/CASP7/MRPS30/COX8A/IDH3B/ATP6V0E1/SURF1/HTRA2/NNT/COX7A2/NDUFS3/ISCA1/DLST/NDUFS4/BCKDHA/MRPL34/FDX1/ACADVL/GLUD1/MRPS15/ATP5PO/COX11/NDUFB6/COX5A/SDHA/ATP5F1A/ATP5MC2/NDUFA6/ECHS1/MTX2/TOMM22/TIMM8B/POLR2F/ATP5F1D/OAT/NDUFA3/ECH1/HSD17B10/TIMM10/COX7B/NDUFC2/NDUFB4/COX17/CYB5R3/COX6A1/ISCU/SDHC/TIMM17A/BAX/UQCRQ/UQCRFS1/NDUFB2/UQCR10/ATP5PF/SLC25A5…
HALLMARK_TNFA_SIGNALING_VIA_NFKB	HALLMARK_TNFA_SIGNALING_VIA_NFKB	145	0.489692	1.60262	0.000789977	0.00987472	0.00789977	1472	tags=33%, list=15%, signal=29%	CCL20/BIRC3/TNFAIP2/VEGFA/PFKFB3/KLF6/CCNL1/CXCL1/CXCL2/G0S2/SOD2/CXCL3/SDC4/HBEGF/LDLR/SQSTM1/TNIP1/BTG2/CXCL6/SAT1/NAMPT/F3/PPP1R15A/FUT4/JUN/EFNA1/TRIB1/ZBTB10/CFLAR/TIPARP/IL18/JAG1/ZC3H12A/OLR1/PDLIM5/MARCKS/NFKBIA/AREG/ETS2/SMAD3/NFE2L2/BHLHE40/IRF1/KLF4/KDM6B/DDX58/ICAM1/BCL6
HALLMARK_KRAS_SIGNALING_UP	HALLMARK_KRAS_SIGNALING_UP	97	0.538513	1.65825	0.00107225	0.0107225	0.00857799	537	tags=24%, list=6%, signal=23%	SERPINA3/CCL20/PIGR/ANXA10/BIRC3/TFPI/ERO1A/CA2/CFB/EREG/HKDC1/SPP1/G0S2/ITGA2/SOX9/HBEGF/GALNT3/MAP7/PTPRR/GPRC5B/PPP1R15A/USH1C/TRIB1
HALLMARK_MYOGENESIS	HALLMARK_MYOGENESIS	85	-0.461151	-1.628	0.00346596	0.028883	0.0231064	679	tags=25%, list=7%, signal=23%	CDKN1A/ITGB5/GABARAPL2/SSPN/CFD/PTGIS/BAG1/EPHB3/GADD45B/FXYD1/PRNP/APOD/IGF1/COL4A2/IGFBP3/COL1A1/AEBP1/SPARC/COL3A1/TAGLN/IGFBP7
HALLMARK_PROTEIN_SECRETION	HALLMARK_PROTEIN_SECRETION	84	0.501523	1.51745	0.00944547	0.0674677	0.0539741	1966	tags=40%, list=20%, signal=33%	TSPAN8/GOLGA4/DST/CLTA/TPD52/CLCN3/SEC31A/ARFGEF1/CLTC/ATP1A1/STX7/RPS6KA3/KRT18/RAB2A/IGF2R/COPB1/STX16/AP2B1/ARFGAP3/DOP1A/ARFGEF2/RAB5A/GNAS/CD63/ICA1/AP3B1/USO1/CTSC/ARFIP1/ATP6V1H/SOD1/DNM1L/SCRN1/ARCN1
HALLMARK_MYC_TARGETS_V1	HALLMARK_MYC_TARGETS_V1	159	-0.369471	-1.42146	0.0138282	0.086426	0.0691408	1098	tags=33%, list=11%, signal=30%	PSMA1/HPRT1/CCT7/TRIM28/CCT4/CCT3/SRSF3/EIF3D/XRCC6/COX5A/FBL/MRPL9/NAP1L1/PHB/NOLC1/ERH/SSBP1/PSMA7/HDGF/DEK/NME1/SRM/PSMB2/PSMB3/GSPT1/UBE2L3/IMPDH2/SNRPD3/SET/STARD7/MCM6/EIF1AX/SNRPG/CCT5/RAN/PSMD8/EIF4A1/PHB2/ODC1/C1QBP/SLC25A3/PPIA/PRDX4/MCM5/PSMA2/NDUFAB1/ILF2/RPL18/RPS3/PRDX3/RANBP1/RPLP0/RPS6
HALLMARK_COAGULATION	HALLMARK_COAGULATION	77	-0.439282	-1.54061	0.0209034	0.11613	0.092904	588	tags=27%, list=6%, signal=26%	SERPING1/CTSH/FYN/CFD/ISCU/MMP7/CAPN2/PRSS23/CTSB/SERPINB2/FN1/TIMP1/A2M/TIMP3/MMP2/ANXA1/S100A13/THBS1/CD9/SERPINE1/SPARC
HALLMARK_ESTROGEN_RESPONSE_LATE	HALLMARK_ESTROGEN_RESPONSE_LATE	114	0.448656	1.4223	0.0242785	0.121392	0.0971138	1465	tags=33%, list=15%, signal=29%	SERPINA3/SERPINA1/TFF3/TFF1/ABHD2/CA2/AGR2/LLGL2/FAM102A/ADD3/CDH1/SLC9A3R1/KLK11/JAK1/LAMC2/ALDH3B1/TST/PKP3/FRK/ALDH3A2/SLC16A1/GALE/DNAJC12/XBP1/AREG/SERPINA5/AFF1/ST14/PERP/IL17RB/PLXNB1/NRIP1/KLF4/ETFB/SORD/UGDH/CA12/KCNK5
HALLMARK_HEME_METABOLISM	HALLMARK_HEME_METABOLISM	127	0.427574	1.37577	0.0362998	0.164999	0.131999	2473	tags=38%, list=25%, signal=29%	PDZK1IP1/CA2/RIOK3/ARHGEF12/RNF19A/CLCN3/LRP10/SLC6A8/ATP6V0A1/BTG2/FOXO3/SLC25A37/OPTN/CTSE/BSG/FBXO34/TOP1/VEZF1/SLC7A11/RBM5/EPB41/TCEA1/ADD1/CAST/KLF3/TFRC/PICALM/SDCBP/EIF2AK1/DAAM1/FBXO9/HTATIP2/CAT/SLC11A2/TNRC6B/KHNYN/USP15/MARK3/ARL2BP/NARF/TMEM9B/NFE2L1/CDR2/CIR1/DCUN1D1/ALAD/CCND3/CCDC28A
HALLMARK_KRAS_SIGNALING_DN	HALLMARK_KRAS_SIGNALING_DN	60	-0.424857	-1.42588	0.0432562	0.180234	0.144187	262	tags=25%, list=3%, signal=24%	EDAR/CELSR2/EDN1/SKIL/SELENOP/CALML5/SGK1/EDN2/KRT15/PKP1/KRT4/SERPINB2/KRT5/KRT13/SPRR3
