# Supplementary material for: Combined targeted and epigenetic-based therapy enhances antitumor immunity by stabilizing GATA6-dependent MHCI expression in pancreatic ductal adenocarcinoma
Source: Research Square preprint supplement (doi:10.21203/rs.3.rs-4555029/v1), 2024-06-16
Supplement: Supplementary file 2 [file 6fa2bd91bb7ac7c94a8f7d92.xlsx]

## Sheet: KEGG_Classical_PvsLT
NAME	GS<br> follow link to MSigDB	GS DETAILS	SIZE	ES	NES	NOM p-val	FDR q-val	FWER p-val	RANK AT MAX	LEADING EDGE
KEGG_LYSOSOME	KEGG_LYSOSOME	Details ...	116	-0.502064	-2.23531	0	0	0	3270	tags=47%, list=19%, signal=57%
KEGG_GRAFT_VERSUS_HOST_DISEASE	KEGG_GRAFT_VERSUS_HOST_DISEASE	Details ...	27	-0.644437	-2.10078	0	0.00101498	0.003	3204	tags=48%, list=19%, signal=59%
KEGG_TYPE_I_DIABETES_MELLITUS	KEGG_TYPE_I_DIABETES_MELLITUS	Details ...	34	-0.538252	-1.89297	0	0.0105791	0.043	2633	tags=38%, list=15%, signal=45%
KEGG_ALLOGRAFT_REJECTION	KEGG_ALLOGRAFT_REJECTION	Details ...	27	-0.579012	-1.88331	0	0.00831036	0.045	1838	tags=37%, list=11%, signal=41%
KEGG_PROTEIN_EXPORT	KEGG_PROTEIN_EXPORT	Details ...	22	-0.584557	-1.82556	0.00475059	0.0134422	0.09	2567	tags=41%, list=15%, signal=48%
KEGG_ANTIGEN_PROCESSING_AND_PRESENTATION	KEGG_ANTIGEN_PROCESSING_AND_PRESENTATION	Details ...	64	-0.448403	-1.78062	0	0.018917	0.147	3165	tags=42%, list=18%, signal=51%
KEGG_GLYCOSAMINOGLYCAN_DEGRADATION	KEGG_GLYCOSAMINOGLYCAN_DEGRADATION	Details ...	21	-0.551926	-1.67489	0.0119048	0.0429449	0.344	3251	tags=57%, list=19%, signal=70%
KEGG_OTHER_GLYCAN_DEGRADATION	KEGG_OTHER_GLYCAN_DEGRADATION	Details ...	16	-0.593269	-1.6618	0.00890869	0.0418832	0.383	3226	tags=75%, list=19%, signal=92%
KEGG_AUTOIMMUNE_THYROID_DISEASE	KEGG_AUTOIMMUNE_THYROID_DISEASE	Details ...	41	-0.434276	-1.54845	0.0295567	0.0914627	0.697	2633	tags=29%, list=15%, signal=34%
KEGG_INTESTINAL_IMMUNE_NETWORK_FOR_IGA_PRODUCTION	KEGG_INTESTINAL_IMMUNE_NETWORK_FOR_IGA_PRODUCTION	Details ...	37	-0.430207	-1.51648	0.0251256	0.105284	0.775	3359	tags=32%, list=19%, signal=40%
KEGG_GLYCOSAMINOGLYCAN_BIOSYNTHESIS_HEPARAN_SULFATE	KEGG_GLYCOSAMINOGLYCAN_BIOSYNTHESIS_HEPARAN_SULFATE	Details ...	26	-0.450845	-1.42184	0.0787037	0.188075	0.946	5441	tags=58%, list=32%, signal=84%
KEGG_BASAL_CELL_CARCINOMA	KEGG_BASAL_CELL_CARCINOMA	Details ...	55	-0.347404	-1.32631	0.068421	0.319478	0.998	1152	tags=22%, list=7%, signal=23%
KEGG_NOD_LIKE_RECEPTOR_SIGNALING_PATHWAY	KEGG_NOD_LIKE_RECEPTOR_SIGNALING_PATHWAY	Details ...	51	-0.344742	-1.31172	0.0797872	0.322932	0.999	2029	tags=27%, list=12%, signal=31%
KEGG_RENIN_ANGIOTENSIN_SYSTEM	KEGG_RENIN_ANGIOTENSIN_SYSTEM	Details ...	15	-0.467375	-1.29282	0.148472	0.336366	1	2358	tags=33%, list=14%, signal=39%
KEGG_SNARE_INTERACTIONS_IN_VESICULAR_TRANSPORT	KEGG_SNARE_INTERACTIONS_IN_VESICULAR_TRANSPORT	Details ...	35	-0.366364	-1.28338	0.12	0.333324	1	605	tags=14%, list=4%, signal=15%
KEGG_REGULATION_OF_AUTOPHAGY	KEGG_REGULATION_OF_AUTOPHAGY	Details ...	35	-0.376148	-1.27885	0.142857	0.320213	1	958	tags=17%, list=6%, signal=18%
KEGG_EPITHELIAL_CELL_SIGNALING_IN_HELICOBACTER_PYLORI_INFECTION	KEGG_EPITHELIAL_CELL_SIGNALING_IN_HELICOBACTER_PYLORI_INFECTION	Details ...	63	-0.323201	-1.2693	0.10221	0.318345	1	2119	tags=27%, list=12%, signal=31%
KEGG_ASTHMA	KEGG_ASTHMA	Details ...	18	-0.43159	-1.2546	0.175439	0.327381	1	3872	tags=39%, list=22%, signal=50%
KEGG_CELL_ADHESION_MOLECULES_CAMS	KEGG_CELL_ADHESION_MOLECULES_CAMS	Details ...	116	-0.272915	-1.20672	0.095679	0.40441	1	2785	tags=31%, list=16%, signal=37%
KEGG_VIBRIO_CHOLERAE_INFECTION	KEGG_VIBRIO_CHOLERAE_INFECTION	Details ...	52	-0.303357	-1.14951	0.212276	0.521406	1	1718	tags=23%, list=10%, signal=26%
KEGG_VIRAL_MYOCARDITIS	KEGG_VIRAL_MYOCARDITIS		57	-0.29378	-1.13532	0.246649	0.536661	1	2633	tags=28%, list=15%, signal=33%
KEGG_CARDIAC_MUSCLE_CONTRACTION	KEGG_CARDIAC_MUSCLE_CONTRACTION		73	-0.282601	-1.13477	0.224044	0.513542	1	3322	tags=27%, list=19%, signal=34%
KEGG_VASOPRESSIN_REGULATED_WATER_REABSORPTION	KEGG_VASOPRESSIN_REGULATED_WATER_REABSORPTION		42	-0.302108	-1.10013	0.292191	0.584502	1	1355	tags=17%, list=8%, signal=18%
KEGG_CALCIUM_SIGNALING_PATHWAY	KEGG_CALCIUM_SIGNALING_PATHWAY		168	-0.230667	-1.0939	0.206107	0.578414	1	4436	tags=35%, list=26%, signal=46%
KEGG_OXIDATIVE_PHOSPHORYLATION	KEGG_OXIDATIVE_PHOSPHORYLATION		124	-0.236535	-1.0763	0.292453	0.603098	1	6670	tags=52%, list=39%, signal=85%
KEGG_NEUROACTIVE_LIGAND_RECEPTOR_INTERACTION	KEGG_NEUROACTIVE_LIGAND_RECEPTOR_INTERACTION		238	-0.215079	-1.05392	0.285141	0.642218	1	4886	tags=33%, list=28%, signal=45%
KEGG_HEDGEHOG_SIGNALING_PATHWAY	KEGG_HEDGEHOG_SIGNALING_PATHWAY		52	-0.273318	-1.05279	0.344737	0.621588	1	4066	tags=38%, list=24%, signal=50%
KEGG_MTOR_SIGNALING_PATHWAY	KEGG_MTOR_SIGNALING_PATHWAY		51	-0.270207	-1.03346	0.373984	0.654592	1	2112	tags=24%, list=12%, signal=27%
KEGG_ALPHA_LINOLENIC_ACID_METABOLISM	KEGG_ALPHA_LINOLENIC_ACID_METABOLISM		17	-0.347726	-1.00571	0.426966	0.711606	1	3987	tags=47%, list=23%, signal=61%
KEGG_GLYCEROLIPID_METABOLISM	KEGG_GLYCEROLIPID_METABOLISM		47	-0.260327	-0.969254	0.49	0.80002	1	2461	tags=26%, list=14%, signal=30%
KEGG_ABC_TRANSPORTERS	KEGG_ABC_TRANSPORTERS		42	-0.255702	-0.939298	0.565217	0.865763	1	1763	tags=17%, list=10%, signal=19%
KEGG_CYTOKINE_CYTOKINE_RECEPTOR_INTERACTION	KEGG_CYTOKINE_CYTOKINE_RECEPTOR_INTERACTION		223	-0.195478	-0.93261	0.665427	0.858594	1	3941	tags=28%, list=23%, signal=36%
KEGG_LEISHMANIA_INFECTION	KEGG_LEISHMANIA_INFECTION		63	-0.237332	-0.926685	0.609164	0.850435	1	3823	tags=30%, list=22%, signal=39%
KEGG_GLYCEROPHOSPHOLIPID_METABOLISM	KEGG_GLYCEROPHOSPHOLIPID_METABOLISM		73	-0.225618	-0.925244	0.650704	0.829466	1	2575	tags=26%, list=15%, signal=30%
KEGG_ALDOSTERONE_REGULATED_SODIUM_REABSORPTION	KEGG_ALDOSTERONE_REGULATED_SODIUM_REABSORPTION		42	-0.250839	-0.914667	0.632754	0.834837	1	573	tags=12%, list=3%, signal=12%
KEGG_ALANINE_ASPARTATE_AND_GLUTAMATE_METABOLISM	KEGG_ALANINE_ASPARTATE_AND_GLUTAMATE_METABOLISM		30	-0.266498	-0.886866	0.614657	0.883312	1	3393	tags=27%, list=20%, signal=33%
KEGG_GALACTOSE_METABOLISM	KEGG_GALACTOSE_METABOLISM		25	-0.267669	-0.854654	0.678984	0.936757	1	3685	tags=28%, list=21%, signal=36%
KEGG_PRIMARY_BILE_ACID_BIOSYNTHESIS	KEGG_PRIMARY_BILE_ACID_BIOSYNTHESIS		16	-0.306369	-0.850267	0.654628	0.922588	1	3734	tags=38%, list=22%, signal=48%
KEGG_GLYCOSAMINOGLYCAN_BIOSYNTHESIS_CHONDROITIN_SULFATE	KEGG_GLYCOSAMINOGLYCAN_BIOSYNTHESIS_CHONDROITIN_SULFATE		22	-0.273908	-0.83553	0.709677	0.929795	1	4613	tags=45%, list=27%, signal=62%
KEGG_TGF_BETA_SIGNALING_PATHWAY	KEGG_TGF_BETA_SIGNALING_PATHWAY		79	-0.19557	-0.811961	0.872549	0.953178	1	4020	tags=27%, list=23%, signal=34%
KEGG_COMPLEMENT_AND_COAGULATION_CASCADES	KEGG_COMPLEMENT_AND_COAGULATION_CASCADES		61	-0.205186	-0.809209	0.83727	0.934769	1	2994	tags=20%, list=17%, signal=24%
KEGG_GLYCOSYLPHOSPHATIDYLINOSITOL_GPI_ANCHOR_BIOSYNTHESIS	KEGG_GLYCOSYLPHOSPHATIDYLINOSITOL_GPI_ANCHOR_BIOSYNTHESIS		24	-0.243892	-0.763309	0.8	0.982406	1	4096	tags=33%, list=24%, signal=44%
KEGG_SYSTEMIC_LUPUS_ERYTHEMATOSUS	KEGG_SYSTEMIC_LUPUS_ERYTHEMATOSUS		43	-0.204604	-0.74224	0.890339	0.985491	1	4157	tags=30%, list=24%, signal=40%
KEGG_ALZHEIMERS_DISEASE	KEGG_ALZHEIMERS_DISEASE		154	-0.156866	-0.724219	0.996633	0.982632	1	2782	tags=18%, list=16%, signal=21%
KEGG_PARKINSONS_DISEASE	KEGG_PARKINSONS_DISEASE		118	-0.158314	-0.704535	0.987578	0.977432	1	6670	tags=44%, list=39%, signal=71%
KEGG_BIOSYNTHESIS_OF_UNSATURATED_FATTY_ACIDS	KEGG_BIOSYNTHESIS_OF_UNSATURATED_FATTY_ACIDS		21	-0.228523	-0.692927	0.865741	0.964576	1	5137	tags=43%, list=30%, signal=61%
KEGG_PRIMARY_IMMUNODEFICIENCY	KEGG_PRIMARY_IMMUNODEFICIENCY		33	-0.193776	-0.668137	0.922886	0.959008	1	6292	tags=52%, list=36%, signal=81%

## Sheet: KEGG_Nonclassical_PvsLT
NAME	GS<br> follow link to MSigDB	GS DETAILS	SIZE	ES	NES	NOM p-val	FDR q-val	FWER p-val	RANK AT MAX	LEADING EDGE
KEGG_RIBOSOME	KEGG_RIBOSOME	Details ...	59	0.623984	2.34399	0	0	0	4504	tags=69%, list=26%, signal=94%
KEGG_TERPENOID_BACKBONE_BIOSYNTHESIS	KEGG_TERPENOID_BACKBONE_BIOSYNTHESIS	Details ...	15	0.704789	1.97208	0	0.0161427	0.027	1701	tags=53%, list=10%, signal=59%
KEGG_MATURITY_ONSET_DIABETES_OF_THE_YOUNG	KEGG_MATURITY_ONSET_DIABETES_OF_THE_YOUNG	Details ...	22	0.580417	1.76831	0.00374532	0.0890084	0.208	1926	tags=41%, list=11%, signal=46%
KEGG_ASCORBATE_AND_ALDARATE_METABOLISM	KEGG_ASCORBATE_AND_ALDARATE_METABOLISM	Details ...	17	0.609221	1.76465	0.00931099	0.0687958	0.213	3511	tags=59%, list=20%, signal=74%
KEGG_APOPTOSIS	KEGG_APOPTOSIS	Details ...	79	0.410421	1.66233	0.00168919	0.153956	0.487	2868	tags=34%, list=17%, signal=41%
KEGG_OOCYTE_MEIOSIS	KEGG_OOCYTE_MEIOSIS	Details ...	105	0.384038	1.61874	0.005291	0.189149	0.632	5494	tags=48%, list=32%, signal=69%
KEGG_PATHOGENIC_ESCHERICHIA_COLI_INFECTION	KEGG_PATHOGENIC_ESCHERICHIA_COLI_INFECTION	Details ...	50	0.438219	1.61051	0.0213904	0.174084	0.654	4947	tags=56%, list=29%, signal=78%
KEGG_LINOLEIC_ACID_METABOLISM	KEGG_LINOLEIC_ACID_METABOLISM	Details ...	25	0.505848	1.57909	0.0318949	0.199226	0.756	2805	tags=56%, list=16%, signal=67%
KEGG_PYRUVATE_METABOLISM	KEGG_PYRUVATE_METABOLISM	Details ...	37	0.442611	1.52867	0.0339893	0.270066	0.905	1405	tags=22%, list=8%, signal=23%
KEGG_B_CELL_RECEPTOR_SIGNALING_PATHWAY	KEGG_B_CELL_RECEPTOR_SIGNALING_PATHWAY	Details ...	74	0.380244	1.51336	0.0151771	0.271047	0.923	4426	tags=43%, list=26%, signal=58%
KEGG_THYROID_CANCER	KEGG_THYROID_CANCER	Details ...	29	0.456898	1.50326	0.0583658	0.264128	0.932	2868	tags=38%, list=17%, signal=45%
KEGG_COLORECTAL_CANCER	KEGG_COLORECTAL_CANCER	Details ...	61	0.382435	1.47017	0.0315615	0.314004	0.967	2910	tags=31%, list=17%, signal=37%
KEGG_ARGININE_AND_PROLINE_METABOLISM	KEGG_ARGININE_AND_PROLINE_METABOLISM	Details ...	52	0.398588	1.46836	0.0415225	0.294001	0.968	3539	tags=37%, list=20%, signal=46%
KEGG_BUTANOATE_METABOLISM	KEGG_BUTANOATE_METABOLISM	Details ...	31	0.440263	1.46463	0.0367133	0.279889	0.97	3511	tags=42%, list=20%, signal=53%
KEGG_STEROID_BIOSYNTHESIS	KEGG_STEROID_BIOSYNTHESIS	Details ...	16	0.519286	1.45563	0.0738636	0.279363	0.975	3750	tags=63%, list=22%, signal=80%
KEGG_VALINE_LEUCINE_AND_ISOLEUCINE_DEGRADATION	KEGG_VALINE_LEUCINE_AND_ISOLEUCINE_DEGRADATION	Details ...	43	0.401039	1.42697	0.0622776	0.320729	0.992	3694	tags=35%, list=21%, signal=44%
KEGG_SMALL_CELL_LUNG_CANCER	KEGG_SMALL_CELL_LUNG_CANCER	Details ...	81	0.348322	1.42514	0.029316	0.305671	0.992	1886	tags=20%, list=11%, signal=22%
KEGG_ADHERENS_JUNCTION	KEGG_ADHERENS_JUNCTION	Details ...	70	0.358884	1.41816	0.034965	0.304104	0.993	5444	tags=47%, list=32%, signal=69%
KEGG_LEUKOCYTE_TRANSENDOTHELIAL_MIGRATION	KEGG_LEUKOCYTE_TRANSENDOTHELIAL_MIGRATION	Details ...	109	0.333964	1.415	0.0229508	0.294766	0.994	4057	tags=37%, list=23%, signal=48%
KEGG_DRUG_METABOLISM_CYTOCHROME_P450	KEGG_DRUG_METABOLISM_CYTOCHROME_P450	Details ...	57	0.375117	1.4148	0.0466786	0.280507	0.994	4704	tags=60%, list=27%, signal=82%
KEGG_DRUG_METABOLISM_OTHER_ENZYMES	KEGG_DRUG_METABOLISM_OTHER_ENZYMES		43	0.397353	1.40162	0.033275	0.291607	0.996	4642	tags=47%, list=27%, signal=63%
KEGG_PENTOSE_AND_GLUCURONATE_INTERCONVERSIONS	KEGG_PENTOSE_AND_GLUCURONATE_INTERCONVERSIONS		20	0.469916	1.40034	0.0809353	0.280969	0.997	4282	tags=55%, list=25%, signal=73%
KEGG_PURINE_METABOLISM	KEGG_PURINE_METABOLISM		150	0.315273	1.39742	0.0135135	0.274577	0.999	4181	tags=33%, list=24%, signal=43%
KEGG_BIOSYNTHESIS_OF_UNSATURATED_FATTY_ACIDS	KEGG_BIOSYNTHESIS_OF_UNSATURATED_FATTY_ACIDS		21	0.467868	1.39516	0.0900901	0.267248	0.999	3194	tags=43%, list=18%, signal=53%
KEGG_GLUTATHIONE_METABOLISM	KEGG_GLUTATHIONE_METABOLISM		45	0.38656	1.37897	0.0572391	0.284651	1	3751	tags=40%, list=22%, signal=51%
KEGG_CHEMOKINE_SIGNALING_PATHWAY	KEGG_CHEMOKINE_SIGNALING_PATHWAY		158	0.304599	1.37251	0.0180921	0.286515	1	4598	tags=38%, list=27%, signal=51%
KEGG_HEMATOPOIETIC_CELL_LINEAGE	KEGG_HEMATOPOIETIC_CELL_LINEAGE		77	0.34355	1.37009	0.0514706	0.281174	1	3351	tags=34%, list=19%, signal=42%
KEGG_REGULATION_OF_ACTIN_CYTOSKELETON	KEGG_REGULATION_OF_ACTIN_CYTOSKELETON		201	0.293054	1.36194	0.0220713	0.285391	1	3425	tags=29%, list=20%, signal=36%
KEGG_MISMATCH_REPAIR	KEGG_MISMATCH_REPAIR		21	0.447333	1.34295	0.120527	0.311074	1	3308	tags=29%, list=19%, signal=35%
KEGG_NEUROTROPHIN_SIGNALING_PATHWAY	KEGG_NEUROTROPHIN_SIGNALING_PATHWAY		121	0.307168	1.34285	0.0354267	0.301144	1	3016	tags=27%, list=17%, signal=33%
KEGG_ENDOMETRIAL_CANCER	KEGG_ENDOMETRIAL_CANCER		52	0.352302	1.31758	0.0791367	0.341505	1	4205	tags=38%, list=24%, signal=51%
KEGG_WNT_SIGNALING_PATHWAY	KEGG_WNT_SIGNALING_PATHWAY		146	0.293689	1.31494	0.0352349	0.336057	1	4307	tags=38%, list=25%, signal=51%
KEGG_PANTOTHENATE_AND_COA_BIOSYNTHESIS	KEGG_PANTOTHENATE_AND_COA_BIOSYNTHESIS		15	0.467591	1.31486	0.15748	0.326194	1	3313	tags=40%, list=19%, signal=49%
KEGG_PROPANOATE_METABOLISM	KEGG_PROPANOATE_METABOLISM		29	0.396986	1.30963	0.1341	0.327033	1	1405	tags=24%, list=8%, signal=26%
KEGG_TIGHT_JUNCTION	KEGG_TIGHT_JUNCTION		122	0.303731	1.3036	0.0691824	0.328671	1	4252	tags=42%, list=25%, signal=55%
KEGG_NICOTINATE_AND_NICOTINAMIDE_METABOLISM	KEGG_NICOTINATE_AND_NICOTINAMIDE_METABOLISM		24	0.417023	1.30142	0.124138	0.323825	1	4645	tags=50%, list=27%, signal=68%
KEGG_ACUTE_MYELOID_LEUKEMIA	KEGG_ACUTE_MYELOID_LEUKEMIA		57	0.343963	1.28814	0.110701	0.341853	1	3058	tags=32%, list=18%, signal=38%
KEGG_ARACHIDONIC_ACID_METABOLISM	KEGG_ARACHIDONIC_ACID_METABOLISM		51	0.348673	1.27906	0.127341	0.350655	1	3028	tags=35%, list=18%, signal=43%
KEGG_PROXIMAL_TUBULE_BICARBONATE_RECLAMATION	KEGG_PROXIMAL_TUBULE_BICARBONATE_RECLAMATION		21	0.42042	1.26446	0.174229	0.373328	1	5264	tags=57%, list=30%, signal=82%
KEGG_PROGESTERONE_MEDIATED_OOCYTE_MATURATION	KEGG_PROGESTERONE_MEDIATED_OOCYTE_MATURATION		82	0.313667	1.26312	0.0954861	0.366774	1	4055	tags=33%, list=23%, signal=43%
KEGG_MAPK_SIGNALING_PATHWAY	KEGG_MAPK_SIGNALING_PATHWAY		253	0.264857	1.25908	0.057508	0.36713	1	2868	tags=26%, list=17%, signal=31%
KEGG_JAK_STAT_SIGNALING_PATHWAY	KEGG_JAK_STAT_SIGNALING_PATHWAY		144	0.282022	1.25572	0.0747967	0.365802	1	1747	tags=14%, list=10%, signal=15%
KEGG_FC_GAMMA_R_MEDIATED_PHAGOCYTOSIS	KEGG_FC_GAMMA_R_MEDIATED_PHAGOCYTOSIS		94	0.301209	1.25247	0.112795	0.365048	1	3517	tags=33%, list=20%, signal=41%
KEGG_SPLICEOSOME	KEGG_SPLICEOSOME		116	0.291106	1.24702	0.0880913	0.368599	1	5581	tags=38%, list=32%, signal=56%
KEGG_GNRH_SIGNALING_PATHWAY	KEGG_GNRH_SIGNALING_PATHWAY		91	0.301502	1.23517	0.116319	0.385327	1	3016	tags=29%, list=17%, signal=34%
KEGG_METABOLISM_OF_XENOBIOTICS_BY_CYTOCHROME_P450	KEGG_METABOLISM_OF_XENOBIOTICS_BY_CYTOCHROME_P450		53	0.32808	1.23384	0.14781	0.3795	1	4666	tags=60%, list=27%, signal=82%
KEGG_TYPE_I_DIABETES_MELLITUS	KEGG_TYPE_I_DIABETES_MELLITUS		34	0.369038	1.23191	0.173599	0.375383	1	1185	tags=18%, list=7%, signal=19%
KEGG_MTOR_SIGNALING_PATHWAY	KEGG_MTOR_SIGNALING_PATHWAY		51	0.328752	1.2294	0.155979	0.373134	1	1030	tags=16%, list=6%, signal=17%
KEGG_HISTIDINE_METABOLISM	KEGG_HISTIDINE_METABOLISM		28	0.383265	1.22886	0.208333	0.366499	1	4796	tags=61%, list=28%, signal=84%
KEGG_GLYCOLYSIS_GLUCONEOGENESIS	KEGG_GLYCOLYSIS_GLUCONEOGENESIS		56	0.326635	1.22469	0.15917	0.367484	1	4853	tags=41%, list=28%, signal=57%
KEGG_PYRIMIDINE_METABOLISM	KEGG_PYRIMIDINE_METABOLISM		94	0.293256	1.21541	0.122164	0.378202	1	4645	tags=31%, list=27%, signal=42%
KEGG_NITROGEN_METABOLISM	KEGG_NITROGEN_METABOLISM		23	0.378187	1.16481	0.26145	0.488174	1	3387	tags=39%, list=20%, signal=49%
KEGG_STARCH_AND_SUCROSE_METABOLISM	KEGG_STARCH_AND_SUCROSE_METABOLISM		38	0.33987	1.16079	0.248201	0.488161	1	3505	tags=37%, list=20%, signal=46%
KEGG_FOCAL_ADHESION	KEGG_FOCAL_ADHESION		192	0.251308	1.15888	0.174551	0.484007	1	3933	tags=31%, list=23%, signal=40%
KEGG_TRYPTOPHAN_METABOLISM	KEGG_TRYPTOPHAN_METABOLISM		39	0.327129	1.141	0.268836	0.518218	1	1802	tags=26%, list=10%, signal=29%
KEGG_NEUROACTIVE_LIGAND_RECEPTOR_INTERACTION	KEGG_NEUROACTIVE_LIGAND_RECEPTOR_INTERACTION		238	0.239733	1.139	0.16913	0.513676	1	3700	tags=26%, list=21%, signal=32%
KEGG_CELL_ADHESION_MOLECULES_CAMS	KEGG_CELL_ADHESION_MOLECULES_CAMS		116	0.263725	1.13284	0.200988	0.519689	1	2486	tags=18%, list=14%, signal=21%
KEGG_NUCLEOTIDE_EXCISION_REPAIR	KEGG_NUCLEOTIDE_EXCISION_REPAIR		42	0.316004	1.13096	0.285714	0.515377	1	3308	tags=26%, list=19%, signal=32%
KEGG_NATURAL_KILLER_CELL_MEDIATED_CYTOTOXICITY	KEGG_NATURAL_KILLER_CELL_MEDIATED_CYTOTOXICITY		117	0.263351	1.12869	0.22651	0.512237	1	3632	tags=29%, list=21%, signal=37%
KEGG_INOSITOL_PHOSPHATE_METABOLISM	KEGG_INOSITOL_PHOSPHATE_METABOLISM		54	0.300111	1.12661	0.245704	0.508684	1	1891	tags=17%, list=11%, signal=19%
KEGG_ETHER_LIPID_METABOLISM	KEGG_ETHER_LIPID_METABOLISM		31	0.34247	1.12514	0.300373	0.503872	1	2810	tags=35%, list=16%, signal=42%
KEGG_VASCULAR_SMOOTH_MUSCLE_CONTRACTION	KEGG_VASCULAR_SMOOTH_MUSCLE_CONTRACTION		107	0.2635	1.12236	0.242833	0.502687	1	4331	tags=35%, list=25%, signal=46%
KEGG_RNA_DEGRADATION	KEGG_RNA_DEGRADATION		53	0.299583	1.11245	0.285451	0.518014	1	4272	tags=28%, list=25%, signal=37%
KEGG_CHRONIC_MYELOID_LEUKEMIA	KEGG_CHRONIC_MYELOID_LEUKEMIA		71	0.281476	1.10519	0.287523	0.527515	1	3016	tags=31%, list=17%, signal=37%
KEGG_AMYOTROPHIC_LATERAL_SCLEROSIS_ALS	KEGG_AMYOTROPHIC_LATERAL_SCLEROSIS_ALS		50	0.298418	1.09855	0.290976	0.536795	1	3250	tags=28%, list=19%, signal=34%
KEGG_AXON_GUIDANCE	KEGG_AXON_GUIDANCE		126	0.252354	1.09791	0.271667	0.530242	1	1875	tags=19%, list=11%, signal=21%
KEGG_RIG_I_LIKE_RECEPTOR_SIGNALING_PATHWAY	KEGG_RIG_I_LIKE_RECEPTOR_SIGNALING_PATHWAY		66	0.280014	1.09685	0.297872	0.524795	1	3749	tags=26%, list=22%, signal=33%
KEGG_PHOSPHATIDYLINOSITOL_SIGNALING_SYSTEM	KEGG_PHOSPHATIDYLINOSITOL_SIGNALING_SYSTEM		75	0.276371	1.09403	0.284936	0.523634	1	1891	tags=21%, list=11%, signal=24%
KEGG_T_CELL_RECEPTOR_SIGNALING_PATHWAY	KEGG_T_CELL_RECEPTOR_SIGNALING_PATHWAY		104	0.257373	1.08843	0.294118	0.529197	1	4251	tags=36%, list=25%, signal=47%
KEGG_ARRHYTHMOGENIC_RIGHT_VENTRICULAR_CARDIOMYOPATHY_ARVC	KEGG_ARRHYTHMOGENIC_RIGHT_VENTRICULAR_CARDIOMYOPATHY_ARVC		73	0.26781	1.06373	0.352415	0.5829	1	3842	tags=29%, list=22%, signal=37%
KEGG_RETINOL_METABOLISM	KEGG_RETINOL_METABOLISM		52	0.286868	1.06326	0.347092	0.575929	1	4808	tags=46%, list=28%, signal=64%
KEGG_VEGF_SIGNALING_PATHWAY	KEGG_VEGF_SIGNALING_PATHWAY		71	0.266115	1.05503	0.348624	0.58807	1	1875	tags=23%, list=11%, signal=25%
KEGG_NOTCH_SIGNALING_PATHWAY	KEGG_NOTCH_SIGNALING_PATHWAY		45	0.298226	1.0529	0.373429	0.585647	1	3155	tags=27%, list=18%, signal=33%
KEGG_ONE_CARBON_POOL_BY_FOLATE	KEGG_ONE_CARBON_POOL_BY_FOLATE		17	0.372278	1.04889	0.397313	0.587664	1	3938	tags=41%, list=23%, signal=53%
KEGG_UBIQUITIN_MEDIATED_PROTEOLYSIS	KEGG_UBIQUITIN_MEDIATED_PROTEOLYSIS		127	0.241145	1.04787	0.351792	0.582276	1	3857	tags=24%, list=22%, signal=30%
KEGG_TYPE_II_DIABETES_MELLITUS	KEGG_TYPE_II_DIABETES_MELLITUS		47	0.281263	1.04635	0.376991	0.578025	1	2020	tags=21%, list=12%, signal=24%
KEGG_ENDOCYTOSIS	KEGG_ENDOCYTOSIS		173	0.229228	1.04459	0.361953	0.574508	1	1973	tags=14%, list=11%, signal=16%
KEGG_BETA_ALANINE_METABOLISM	KEGG_BETA_ALANINE_METABOLISM		22	0.344246	1.04278	0.417883	0.571145	1	3511	tags=41%, list=20%, signal=51%
KEGG_PENTOSE_PHOSPHATE_PATHWAY	KEGG_PENTOSE_PHOSPHATE_PATHWAY		24	0.331866	1.03914	0.395564	0.572732	1	4260	tags=42%, list=25%, signal=55%
KEGG_SELENOAMINO_ACID_METABOLISM	KEGG_SELENOAMINO_ACID_METABOLISM		24	0.337623	1.0335	0.413084	0.579219	1	3543	tags=38%, list=21%, signal=47%
KEGG_PROSTATE_CANCER	KEGG_PROSTATE_CANCER		89	0.24713	1.01998	0.395548	0.604399	1	3326	tags=27%, list=19%, signal=33%
KEGG_TOLL_LIKE_RECEPTOR_SIGNALING_PATHWAY	KEGG_TOLL_LIKE_RECEPTOR_SIGNALING_PATHWAY		97	0.241398	1.01524	0.426829	0.608534	1	2329	tags=18%, list=13%, signal=20%
KEGG_FC_EPSILON_RI_SIGNALING_PATHWAY	KEGG_FC_EPSILON_RI_SIGNALING_PATHWAY		76	0.254701	1.01341	0.404362	0.605187	1	3574	tags=29%, list=21%, signal=36%
KEGG_PATHWAYS_IN_CANCER	KEGG_PATHWAYS_IN_CANCER		315	0.2089	1.0119	0.416541	0.601721	1	3064	tags=21%, list=18%, signal=25%
KEGG_ALANINE_ASPARTATE_AND_GLUTAMATE_METABOLISM	KEGG_ALANINE_ASPARTATE_AND_GLUTAMATE_METABOLISM		30	0.299543	1.00415	0.444646	0.612576	1	4895	tags=40%, list=28%, signal=56%
KEGG_INSULIN_SIGNALING_PATHWAY	KEGG_INSULIN_SIGNALING_PATHWAY		132	0.228761	0.999229	0.450166	0.616544	1	3016	tags=21%, list=17%, signal=26%
KEGG_FRUCTOSE_AND_MANNOSE_METABOLISM	KEGG_FRUCTOSE_AND_MANNOSE_METABOLISM		32	0.291769	0.972481	0.514981	0.675023	1	2630	tags=25%, list=15%, signal=29%
KEGG_GAP_JUNCTION	KEGG_GAP_JUNCTION		81	0.241247	0.970979	0.513089	0.670822	1	3016	tags=27%, list=17%, signal=33%
KEGG_CYTOKINE_CYTOKINE_RECEPTOR_INTERACTION	KEGG_CYTOKINE_CYTOKINE_RECEPTOR_INTERACTION		223	0.206208	0.96802	0.553922	0.670689	1	4598	tags=30%, list=27%, signal=40%
KEGG_NON_SMALL_CELL_LUNG_CANCER	KEGG_NON_SMALL_CELL_LUNG_CANCER		53	0.256343	0.96258	0.5189	0.67631	1	4205	tags=40%, list=24%, signal=52%
KEGG_DILATED_CARDIOMYOPATHY	KEGG_DILATED_CARDIOMYOPATHY		86	0.233152	0.950822	0.549658	0.696579	1	3083	tags=24%, list=18%, signal=30%
KEGG_PRION_DISEASES	KEGG_PRION_DISEASES		29	0.281695	0.932512	0.558875	0.732933	1	2670	tags=24%, list=15%, signal=29%
KEGG_CELL_CYCLE	KEGG_CELL_CYCLE		120	0.212227	0.928335	0.623529	0.736091	1	5464	tags=39%, list=32%, signal=57%
KEGG_LYSINE_DEGRADATION	KEGG_LYSINE_DEGRADATION		42	0.260976	0.924658	0.568528	0.737241	1	1590	tags=17%, list=9%, signal=18%
KEGG_HEDGEHOG_SIGNALING_PATHWAY	KEGG_HEDGEHOG_SIGNALING_PATHWAY		52	0.247358	0.920459	0.602518	0.73953	1	2812	tags=25%, list=16%, signal=30%
KEGG_PANCREATIC_CANCER	KEGG_PANCREATIC_CANCER		68	0.237947	0.91369	0.618538	0.74741	1	4310	tags=35%, list=25%, signal=47%
KEGG_COMPLEMENT_AND_COAGULATION_CASCADES	KEGG_COMPLEMENT_AND_COAGULATION_CASCADES		61	0.236904	0.909451	0.618487	0.749834	1	3362	tags=25%, list=19%, signal=30%
KEGG_HYPERTROPHIC_CARDIOMYOPATHY_HCM	KEGG_HYPERTROPHIC_CARDIOMYOPATHY_HCM		80	0.221951	0.895751	0.668896	0.774105	1	2362	tags=19%, list=14%, signal=22%
KEGG_CALCIUM_SIGNALING_PATHWAY	KEGG_CALCIUM_SIGNALING_PATHWAY		168	0.196638	0.887514	0.710824	0.78405	1	2277	tags=16%, list=13%, signal=18%
KEGG_P53_SIGNALING_PATHWAY	KEGG_P53_SIGNALING_PATHWAY		62	0.233511	0.884056	0.673333	0.783708	1	1553	tags=15%, list=9%, signal=16%
KEGG_TGF_BETA_SIGNALING_PATHWAY	KEGG_TGF_BETA_SIGNALING_PATHWAY		79	0.210009	0.838106	0.777969	0.87389	1	4503	tags=35%, list=26%, signal=48%
KEGG_TASTE_TRANSDUCTION	KEGG_TASTE_TRANSDUCTION		31	0.249166	0.818844	0.749553	0.903627	1	3472	tags=32%, list=20%, signal=40%
KEGG_GLYCOSPHINGOLIPID_BIOSYNTHESIS_LACTO_AND_NEOLACTO_SERIES	KEGG_GLYCOSPHINGOLIPID_BIOSYNTHESIS_LACTO_AND_NEOLACTO_SERIES		23	0.264141	0.81596	0.735985	0.900157	1	1126	tags=13%, list=7%, signal=14%
KEGG_DNA_REPLICATION	KEGG_DNA_REPLICATION		34	0.237651	0.811406	0.748603	0.89916	1	6544	tags=38%, list=38%, signal=61%
KEGG_CITRATE_CYCLE_TCA_CYCLE	KEGG_CITRATE_CYCLE_TCA_CYCLE		29	0.243535	0.799564	0.751434	0.911334	1	3518	tags=24%, list=20%, signal=30%
KEGG_BLADDER_CANCER	KEGG_BLADDER_CANCER		40	0.222117	0.770009	0.82526	0.949251	1	4205	tags=35%, list=24%, signal=46%
KEGG_DORSO_VENTRAL_AXIS_FORMATION	KEGG_DORSO_VENTRAL_AXIS_FORMATION		21	0.255427	0.761793	0.818526	0.951831	1	4205	tags=33%, list=24%, signal=44%
KEGG_PPAR_SIGNALING_PATHWAY	KEGG_PPAR_SIGNALING_PATHWAY		66	0.189335	0.732772	0.915371	0.980468	1	4975	tags=32%, list=29%, signal=45%
KEGG_AMINOACYL_TRNA_BIOSYNTHESIS	KEGG_AMINOACYL_TRNA_BIOSYNTHESIS		22	0.241961	0.728083	0.852552	0.976453	1	3864	tags=23%, list=22%, signal=29%
KEGG_PRIMARY_IMMUNODEFICIENCY	KEGG_PRIMARY_IMMUNODEFICIENCY		33	0.212291	0.713217	0.901818	0.981834	1	4426	tags=30%, list=26%, signal=41%
KEGG_BASE_EXCISION_REPAIR	KEGG_BASE_EXCISION_REPAIR		31	0.190867	0.631614	0.949275	1	1	4020	tags=29%, list=23%, signal=38%
KEGG_CYSTEINE_AND_METHIONINE_METABOLISM	KEGG_CYSTEINE_AND_METHIONINE_METABOLISM		31	0.185997	0.617305	0.95288	1	1	4784	tags=29%, list=28%, signal=40%
KEGG_PROTEASOME	KEGG_PROTEASOME		42	0.168626	0.612144	0.974499	1	1	4171	tags=19%, list=24%, signal=25%
KEGG_BASAL_TRANSCRIPTION_FACTORS	KEGG_BASAL_TRANSCRIPTION_FACTORS		33	0.1756	0.58883	0.973822	1	1	5873	tags=42%, list=34%, signal=64%
KEGG_HOMOLOGOUS_RECOMBINATION	KEGG_HOMOLOGOUS_RECOMBINATION		25	0.16709	0.529221	0.992701	1	1	5386	tags=36%, list=31%, signal=52%
KEGG_GLYCOSAMINOGLYCAN_BIOSYNTHESIS_CHONDROITIN_SULFATE	KEGG_GLYCOSAMINOGLYCAN_BIOSYNTHESIS_CHONDROITIN_SULFATE		22	0.153643	0.466818	0.996146	1	1	3036	tags=14%, list=18%, signal=17%
KEGG_RNA_POLYMERASE	KEGG_RNA_POLYMERASE		26	0.136978	0.435272	1	0.999642	1	377	tags=4%, list=2%, signal=4%

## Sheet: Hallmarks_Nonclassical_PvsLT
NAME	GS<br> follow link to MSigDB	GS DETAILS	SIZE	ES	NES	NOM p-val	FDR q-val	FWER p-val	RANK AT MAX	LEADING EDGE
HALLMARK_KRAS_SIGNALING_UP	HALLMARK_KRAS_SIGNALING_UP	Details ...	195	0.458303	2.12428	0	0	0	3300	tags=40%, list=19%, signal=49%
HALLMARK_MYC_TARGETS_V1	HALLMARK_MYC_TARGETS_V1	Details ...	178	0.423219	1.93663	0	0	0	6632	tags=55%, list=38%, signal=88%
HALLMARK_CHOLESTEROL_HOMEOSTASIS	HALLMARK_CHOLESTEROL_HOMEOSTASIS	Details ...	71	0.4843	1.90141	0	0.000425287	0.001	2050	tags=37%, list=12%, signal=41%
HALLMARK_IL2_STAT5_SIGNALING	HALLMARK_IL2_STAT5_SIGNALING	Details ...	190	0.399119	1.84695	0	0.00146334	0.005	2992	tags=35%, list=17%, signal=42%
HALLMARK_SPERMATOGENESIS	HALLMARK_SPERMATOGENESIS	Details ...	126	0.417724	1.81076	0	0.00260999	0.011	4563	tags=44%, list=26%, signal=59%
HALLMARK_APICAL_JUNCTION	HALLMARK_APICAL_JUNCTION	Details ...	194	0.352964	1.64441	0	0.0116158	0.055	3324	tags=31%, list=19%, signal=39%
HALLMARK_ESTROGEN_RESPONSE_EARLY	HALLMARK_ESTROGEN_RESPONSE_EARLY	Details ...	195	0.350102	1.6175	0	0.0143008	0.078	3952	tags=37%, list=23%, signal=48%
HALLMARK_ANDROGEN_RESPONSE	HALLMARK_ANDROGEN_RESPONSE	Details ...	96	0.382448	1.58789	0	0.0179773	0.113	3248	tags=30%, list=19%, signal=37%
HALLMARK_ESTROGEN_RESPONSE_LATE	HALLMARK_ESTROGEN_RESPONSE_LATE	Details ...	197	0.328673	1.51183	0.00493421	0.0353476	0.233	2876	tags=28%, list=17%, signal=34%
HALLMARK_COMPLEMENT	HALLMARK_COMPLEMENT	Details ...	180	0.315303	1.45778	0.00809062	0.0507175	0.339	3414	tags=31%, list=20%, signal=38%
HALLMARK_XENOBIOTIC_METABOLISM	HALLMARK_XENOBIOTIC_METABOLISM	Details ...	190	0.305888	1.40429	0.00816993	0.0790338	0.508	3694	tags=32%, list=21%, signal=40%
HALLMARK_TGF_BETA_SIGNALING	HALLMARK_TGF_BETA_SIGNALING	Details ...	53	0.357643	1.33461	0.0784983	0.140676	0.748	4564	tags=43%, list=26%, signal=59%
HALLMARK_COAGULATION	HALLMARK_COAGULATION	Details ...	127	0.301731	1.32321	0.0373377	0.142397	0.779	2665	tags=25%, list=15%, signal=30%
HALLMARK_INFLAMMATORY_RESPONSE	HALLMARK_INFLAMMATORY_RESPONSE	Details ...	187	0.283398	1.30454	0.0394322	0.154808	0.842	2247	tags=21%, list=13%, signal=24%
HALLMARK_BILE_ACID_METABOLISM	HALLMARK_BILE_ACID_METABOLISM	Details ...	110	0.297997	1.2624	0.0819113	0.208144	0.936	4826	tags=42%, list=28%, signal=58%
HALLMARK_G2M_CHECKPOINT	HALLMARK_G2M_CHECKPOINT	Details ...	189	0.268858	1.24353	0.0782473	0.224538	0.955	6646	tags=45%, list=38%, signal=72%
HALLMARK_WNT_BETA_CATENIN_SIGNALING	HALLMARK_WNT_BETA_CATENIN_SIGNALING	Details ...	41	0.347995	1.22107	0.188849	0.250112	0.976	2649	tags=29%, list=15%, signal=34%
HALLMARK_IL6_JAK_STAT3_SIGNALING	HALLMARK_IL6_JAK_STAT3_SIGNALING	Details ...	82	0.295375	1.20484	0.164557	0.266811	0.984	2329	tags=22%, list=13%, signal=25%
HALLMARK_PANCREAS_BETA_CELLS	HALLMARK_PANCREAS_BETA_CELLS	Details ...	37	0.349212	1.19211	0.207792	0.278231	0.986	2883	tags=22%, list=17%, signal=26%
HALLMARK_APOPTOSIS	HALLMARK_APOPTOSIS	Details ...	156	0.262089	1.17214	0.150165	0.305713	0.993	3315	tags=28%, list=19%, signal=35%
HALLMARK_PEROXISOME	HALLMARK_PEROXISOME		100	0.270498	1.14334	0.204355	0.353565	0.998	4797	tags=39%, list=28%, signal=54%
HALLMARK_NOTCH_SIGNALING	HALLMARK_NOTCH_SIGNALING		32	0.341091	1.13482	0.267135	0.354258	0.999	4307	tags=50%, list=25%, signal=66%
HALLMARK_P53_PATHWAY	HALLMARK_P53_PATHWAY		188	0.238974	1.11379	0.23053	0.386817	1	2910	tags=25%, list=17%, signal=30%
HALLMARK_E2F_TARGETS	HALLMARK_E2F_TARGETS		193	0.241827	1.11113	0.239601	0.375958	1	6621	tags=45%, list=38%, signal=72%
HALLMARK_ANGIOGENESIS	HALLMARK_ANGIOGENESIS		35	0.308854	1.04518	0.375465	0.527144	1	2633	tags=26%, list=15%, signal=30%
HALLMARK_KRAS_SIGNALING_DN	HALLMARK_KRAS_SIGNALING_DN		183	0.219171	1.00819	0.42053	0.614819	1	4127	tags=29%, list=24%, signal=38%
HALLMARK_APICAL_SURFACE	HALLMARK_APICAL_SURFACE		44	0.274614	0.989776	0.461967	0.646321	1	1228	tags=16%, list=7%, signal=17%
HALLMARK_GLYCOLYSIS	HALLMARK_GLYCOLYSIS		195	0.211408	0.983567	0.505582	0.640908	1	5254	tags=33%, list=30%, signal=47%
HALLMARK_FATTY_ACID_METABOLISM	HALLMARK_FATTY_ACID_METABOLISM		156	0.221889	0.983121	0.481361	0.619961	1	5087	tags=38%, list=29%, signal=53%
HALLMARK_MITOTIC_SPINDLE	HALLMARK_MITOTIC_SPINDLE		196	0.210729	0.973269	0.5033	0.627085	1	5401	tags=35%, list=31%, signal=50%
HALLMARK_REACTIVE_OXYGEN_SPECIES_PATHWAY	HALLMARK_REACTIVE_OXYGEN_SPECIES_PATHWAY		48	0.268077	0.96677	0.515151	0.62389	1	1741	tags=19%, list=10%, signal=21%
HALLMARK_UV_RESPONSE_DN	HALLMARK_UV_RESPONSE_DN		141	0.20933	0.926357	0.590219	0.716643	1	3678	tags=28%, list=21%, signal=35%
HALLMARK_HEDGEHOG_SIGNALING	HALLMARK_HEDGEHOG_SIGNALING		36	0.268209	0.925922	0.55618	0.695885	1	3002	tags=25%, list=17%, signal=30%
HALLMARK_MYC_TARGETS_V2	HALLMARK_MYC_TARGETS_V2		52	0.239942	0.901295	0.617537	0.740881	1	5788	tags=37%, list=34%, signal=55%
HALLMARK_MTORC1_SIGNALING	HALLMARK_MTORC1_SIGNALING		186	0.183273	0.841545	0.84891	0.865559	1	4067	tags=24%, list=24%, signal=31%
HALLMARK_DNA_REPAIR	HALLMARK_DNA_REPAIR		144	0.18654	0.824427	0.877617	0.876011	1	2652	tags=16%, list=15%, signal=19%
HALLMARK_INTERFERON_ALPHA_RESPONSE	HALLMARK_INTERFERON_ALPHA_RESPONSE		90	0.175511	0.726284	0.959596	0.966544	1	4626	tags=31%, list=27%, signal=42%
