# Supplementary material for: Combined targeted and epigenetic-based therapy enhances antitumor immunity by stabilizing GATA6-dependent MHCI expression in pancreatic ductal adenocarcinoma
Source: Research Square preprint supplement (doi:10.21203/rs.3.rs-4555029/v1), 2024-06-16
Supplement: Supplementary file 3 [file a8aefeff621accd8549d0341.xlsx]

## Sheet: GATA6_Epi_DEG
gene	logFC	lfcSE	stat	pvalue	padj
C1R	-2.86026	0.401498	-7.12398	1.05e-12	1.46e-08
FLRT2	-3.46778	0.516249	-6.71726	1.85e-11	1.29e-07
PDE3A	-3.83084	0.585218	-6.546	5.91e-11	2.74e-07
LAMA4	-2.29108	0.365377	-6.27046	3.6e-10	1.25e-06
CAV1	-2.28447	0.381933	-5.98133	2.21e-09	6.15e-06
TMEM158	-4.26451	0.741042	-5.75475	8.68e-09	1.97e-05
DYSF	-4.34769	0.758552	-5.73157	9.95e-09	1.97e-05
LYZ	2.57148	0.454949	5.65224	1.58e-08	2.25e-05
VIM	-1.87406	0.332226	-5.64093	1.69e-08	2.25e-05
TM9SF3	1.01744	0.180474	5.63759	1.72e-08	2.25e-05
PHLDB2	-2.0313	0.360668	-5.63206	1.78e-08	2.25e-05
CFH	-2.04203	0.363911	-5.61135	2.01e-08	2.32e-05
SPOCK1	-2.37398	0.42413	-5.5973	2.18e-08	2.33e-05
MT2A	-2.13388	0.382291	-5.58181	2.38e-08	2.36e-05
NFIL3	-1.46646	0.263289	-5.56977	2.55e-08	2.36e-05
BVES	-4.91919	0.890176	-5.52609	3.27e-08	2.84e-05
EFEMP1	-2.81259	0.510673	-5.50762	3.64e-08	2.93e-05
THBS1	-1.97519	0.359122	-5.50004	3.8e-08	2.93e-05
TUBA1A	-2.06983	0.384148	-5.38809	7.12e-08	5.21e-05
CPE	-2.96344	0.552184	-5.36676	8.02e-08	5.57e-05
CNN3	-1.62743	0.30842	-5.27666	1.32e-07	8.7e-05
COL4A2	-1.97847	0.37685	-5.25001	1.52e-07	9.24e-05
ABHD3	1.53843	0.293092	5.24895	1.53e-07	9.24e-05
ELL2	-1.15727	0.221674	-5.2206	1.78e-07	9.98e-05
ADAMTS2	-2.52141	0.483093	-5.21929	1.8e-07	9.98e-05
ROBO1	-2.49281	0.478639	-5.20812	1.91e-07	0.000101929
SGK1	-1.46754	0.284518	-5.15799	2.5e-07	0.000128432
C1S	-2.00238	0.389832	-5.13653	2.8e-07	0.000138853
STON1	-2.72844	0.536473	-5.08588	3.66e-07	0.000171677
SEMA3C	-1.35407	0.26637	-5.0834	3.71e-07	0.000171677
CDH5	-4.79797	0.946368	-5.06988	3.98e-07	0.000178389
CXCL6	-2.95669	0.590607	-5.00618	5.55e-07	0.000241025
GREM1	-1.93929	0.390854	-4.96168	6.99e-07	0.000282346
NUAK1	-2.15887	0.435397	-4.9584	7.11e-07	0.000282346
PDGFC	-1.72773	0.348457	-4.95824	7.11e-07	0.000282346
C2orf88	1.95065	0.395155	4.93641	7.96e-07	0.000306809
ZEB1	-1.71758	0.348472	-4.92891	8.27e-07	0.000306809
RAB31	-1.61867	0.328596	-4.92601	8.39e-07	0.000306809
MYLK	-1.72636	0.351118	-4.91675	8.8e-07	0.000313429
PECAM1	-2.5651	0.522463	-4.90963	9.12e-07	0.000316902
DCBLD2	-1.85823	0.380956	-4.87781	1.07e-06	0.000362636
FSTL1	-1.42926	0.293271	-4.8735	1.1e-06	0.000362636
IL1R1	-1.47908	0.304238	-4.86161	1.16e-06	0.000376175
NIN	-1.31373	0.271479	-4.83917	1.3e-06	0.000404122
C9orf84	-2.40825	0.497739	-4.83837	1.31e-06	0.000404122
PTPN13	-1.92779	0.39892	-4.83251	1.35e-06	0.000407162
WNT5A	-1.81397	0.376533	-4.81756	1.45e-06	0.000429533
TSPAN8	1.60772	0.334414	4.80757	1.53e-06	0.00044216
DDR2	-2.42325	0.507715	-4.77285	1.82e-06	0.000514962
GLIPR1	-1.83214	0.384449	-4.76563	1.88e-06	0.000523081
RARRES2	-2.59379	0.546058	-4.75002	2.03e-06	0.000554038
PI15	-3.659	0.774693	-4.72316	2.32e-06	0.000620347
KCNT2	-3.46766	0.735474	-4.71487	2.42e-06	0.000633973
APCDD1	-2.29417	0.488094	-4.70027	2.6e-06	0.000668399
REG4	3.38261	0.720386	4.69555	2.66e-06	0.000669072
CHI3L1	-3.64815	0.777421	-4.69263	2.7e-06	0.000669072
PXDN	-2.05895	0.4393	-4.68689	2.77e-06	0.000670925
SYT13	1.60399	0.342409	4.68444	2.81e-06	0.000670925
GATA6	1.03009	0.22004	4.68138	2.85e-06	0.000670925
ANXA1	-1.30315	0.279571	-4.66124	3.14e-06	0.000724381
PRSS23	-1.55134	0.332992	-4.65879	3.18e-06	0.000724381
GJC1	-3.21056	0.693003	-4.63282	3.61e-06	0.000808239
PAQR8	1.47512	0.320142	4.60772	4.07e-06	0.000897691
IGFBP7	-1.41975	0.309778	-4.58311	4.58e-06	0.000994377
ERRFI1	-1.1352	0.247974	-4.57788	4.7e-06	0.00100386
CSRNP3	-2.27991	0.503128	-4.53148	5.86e-06	0.00123286
QKI	-1.13875	0.251656	-4.52502	6.04e-06	0.00125216
DSE	-1.79149	0.396515	-4.51811	6.24e-06	0.0012747
SRGN	-2.2459	0.497927	-4.5105	6.47e-06	0.00130215
GIMAP2	1.71692	0.381675	4.49839	6.85e-06	0.001336
TAB2	-0.69427	0.15439	-4.49686	6.9e-06	0.001336
FN1	-1.53577	0.341586	-4.496	6.92e-06	0.001336
BASP1	-2.37869	0.533657	-4.45734	8.3e-06	0.00156396
SCG2	-3.57926	0.803349	-4.45542	8.37e-06	0.00156396
SERPINE1	-1.95799	0.43964	-4.45362	8.44e-06	0.00156396
PLXDC2	-1.85829	0.417682	-4.44906	8.62e-06	0.00157653
IGFBP3	-1.59287	0.358569	-4.44231	8.9e-06	0.0016057
TRPS1	-1.37235	0.310987	-4.41288	1.02e-05	0.00181227
PYGO1	-2.91074	0.660381	-4.40766	1.04e-05	0.00181227
KCNE3	1.53073	0.34729	4.40763	1.05e-05	0.00181227
FAT3	-3.64651	0.828025	-4.40386	1.06e-05	0.00181227
EDIL3	-1.91425	0.434803	-4.40258	1.07e-05	0.00181227
SLC9A2	1.82118	0.4144	4.39473	1.11e-05	0.00184151
FAM134B	1.67448	0.381237	4.39223	1.12e-05	0.00184151
MAP1B	-1.78053	0.405468	-4.3913	1.13e-05	0.00184151
TNFAIP6	-2.5284	0.576361	-4.38683	1.15e-05	0.00185785
ZNF208	-3.40708	0.779279	-4.3721	1.23e-05	0.00194848
FAP	-2.04522	0.467858	-4.37144	1.23e-05	0.00194848
MARCH3	1.71261	0.39214	4.36734	1.26e-05	0.00196314
ITIH5	-2.84204	0.651649	-4.3613	1.29e-05	0.00199568
LOC100294406	-1.96948	0.451859	-4.35862	1.31e-05	0.00199807
LTBP2	-1.58607	0.364717	-4.34876	1.37e-05	0.00206385
PTGS2	-1.92459	0.442764	-4.34676	1.38e-05	0.00206385
GPX3	-2.32661	0.536939	-4.3331	1.47e-05	0.00215167
SVEP1	-2.55512	0.589699	-4.33293	1.47e-05	0.00215167
CABLES1	1.39489	0.322486	4.32544	1.52e-05	0.00218898
SPP1	-2.33197	0.53978	-4.32022	1.56e-05	0.00218898
PTP4A1	-1.08317	0.250737	-4.31996	1.56e-05	0.00218898
GAS1	-3.25517	0.75388	-4.31788	1.58e-05	0.00218898
CREB3L2	-0.831762	0.192634	-4.31783	1.58e-05	0.00218898
FIGN	-3.64969	0.849847	-4.29452	1.75e-05	0.0023359
SSC5D	-2.45682	0.572155	-4.29398	1.75e-05	0.0023359
PTPRD	-3.08308	0.71839	-4.29165	1.77e-05	0.0023359
NPAS3	-3.43213	0.800095	-4.28965	1.79e-05	0.0023359
UCHL1	-4.13713	0.964524	-4.2893	1.79e-05	0.0023359
GNAI1	-1.3212	0.308025	-4.28927	1.79e-05	0.0023359
HEG1	-1.84389	0.429966	-4.28846	1.8e-05	0.0023359
PIP5K1B	1.52703	0.356871	4.27895	1.88e-05	0.00241535
HTRA1	-1.56369	0.365747	-4.27533	1.91e-05	0.00243242
SLC2A3	-2.06689	0.484853	-4.26292	2.02e-05	0.00253011
CDK14	-1.47309	0.345619	-4.26219	2.02e-05	0.00253011
PORCN	-1.86737	0.438299	-4.26049	2.04e-05	0.00253011
HOOK3	-0.958676	0.225335	-4.25445	2.1e-05	0.00257636
MCAM	-2.61967	0.616716	-4.24777	2.16e-05	0.00261529
SLC45A3	1.51335	0.356366	4.24661	2.17e-05	0.00261529
ADM	-2.06093	0.485471	-4.24522	2.18e-05	0.00261529
HSD17B2	1.9517	0.460405	4.23909	2.24e-05	0.00266473
CD248	-2.40801	0.569091	-4.23133	2.32e-05	0.00273495
CLCN5	1.35786	0.321902	4.21826	2.46e-05	0.00287411
ANXA10	1.79455	0.425628	4.21625	2.48e-05	0.00287562
CMPK2	1.93901	0.46059	4.20984	2.56e-05	0.00293401
SNAI2	-2.35463	0.562064	-4.18926	2.8e-05	0.00317491
ABCC9	-2.35272	0.561742	-4.18826	2.81e-05	0.00317491
FERMT2	-1.73558	0.41466	-4.18554	2.84e-05	0.00318715
RDX	-1.22086	0.292092	-4.17971	2.92e-05	0.00324385
TPM2	-1.59258	0.38124	-4.17735	2.95e-05	0.00325162
ZFPM2	-2.09514	0.502122	-4.17257	3.01e-05	0.00329455
CLDN18	2.34149	0.5664	4.13398	3.57e-05	0.00386954
COL15A1	-1.98641	0.481233	-4.12775	3.66e-05	0.00394497
MYH11	-2.16174	0.523968	-4.12571	3.7e-05	0.00394954
NDUFS3	1.02071	0.247794	4.11919	3.8e-05	0.00403125
CHL1	-4.1222	1.00126	-4.117	3.84e-05	0.00403125
SLC16A3	-1.43833	0.349471	-4.11574	3.86e-05	0.00403125
CDH2	-2.79886	0.680715	-4.11166	3.93e-05	0.00407254
PDGFRB	-1.53048	0.37267	-4.1068	4.01e-05	0.00412828
VWF	-2.67316	0.651935	-4.10035	4.13e-05	0.00421389
COL6A3	-1.24179	0.303802	-4.08749	4.36e-05	0.0044208
ASAP1	-0.932091	0.228126	-4.08585	4.39e-05	0.0044208
CNRIP1	-3.561	0.87224	-4.08259	4.45e-05	0.00445105
SERINC1	-0.599448	0.147312	-4.06923	4.72e-05	0.00468039
ZFAND5	-0.699688	0.172462	-4.05706	4.97e-05	0.00489602
IGFBP5	-1.50377	0.370967	-4.05365	5.04e-05	0.00493315
PODN	-2.05827	0.508268	-4.04957	5.13e-05	0.00495801
C19orf77	2.24076	0.553384	4.0492	5.14e-05	0.00495801
F2R	-1.38909	0.343674	-4.04187	5.3e-05	0.00508029
FRMD6	-1.1528	0.285446	-4.03858	5.38e-05	0.00511683
DMTF1	-0.898404	0.222642	-4.03519	5.46e-05	0.00515597
C7	-1.98387	0.492419	-4.02883	5.61e-05	0.00524423
ZNF423	-2.69411	0.668841	-4.02802	5.62e-05	0.00524423
FAM171B	-1.99504	0.496096	-4.02148	5.78e-05	0.00535615
CYP2S1	1.58631	0.396172	4.0041	6.23e-05	0.00571273
AKT3	-1.59543	0.398587	-4.00271	6.26e-05	0.00571273
TREM1	-3.3469	0.836626	-4.00047	6.32e-05	0.00571273
RIMKLB	-1.85231	0.463129	-3.99956	6.35e-05	0.00571273
GALNT1	-0.926532	0.231719	-3.99852	6.37e-05	0.00571273
COL6A2	-1.76175	0.441686	-3.9887	6.64e-05	0.00589143
ADD3	0.676224	0.169557	3.98818	6.66e-05	0.00589143
PDE10A	-2.64789	0.664598	-3.9842	6.77e-05	0.00595304
LGALS1	-1.66522	0.418605	-3.97802	6.95e-05	0.00603492
PLS3	-0.75897	0.190824	-3.97733	6.97e-05	0.00603492
H3F3C	-0.903009	0.227087	-3.97649	6.99e-05	0.00603492
SPARCL1	-1.61659	0.406689	-3.975	7.04e-05	0.00603519
LTBP1	-1.12299	0.282811	-3.97081	7.16e-05	0.00610466
CYBB	-1.71729	0.432804	-3.96783	7.25e-05	0.00614376
COL4A5	-2.57649	0.650093	-3.96327	7.39e-05	0.0062245
TPRG1L	1.04538	0.263987	3.95995	7.5e-05	0.00627351
SLC39A6	-1.069	0.270193	-3.95643	7.61e-05	0.00632859
C11orf92	1.94487	0.492292	3.95065	7.79e-05	0.00643861
SOD2	-1.08619	0.275022	-3.94946	7.83e-05	0.00643861
FLNA	-1.06324	0.269791	-3.941	8.11e-05	0.00663077
TGFB2	-1.51937	0.385842	-3.9378	8.22e-05	0.00668042
NRP1	-1.17132	0.29923	-3.91444	9.06e-05	0.00731858
STIP1	-0.829443	0.212191	-3.90895	9.27e-05	0.00742564
ETS1	-0.832527	0.213024	-3.90814	9.3e-05	0.00742564
IQGAP2	1.09137	0.280359	3.89278	9.91e-05	0.00786706
LRP11	-0.828575	0.212929	-3.89133	9.97e-05	0.00786933
PTX3	-4.89355	1.25873	-3.88767	0.000101209	0.0079435
COL4A1	-1.24523	0.320763	-3.88207	0.000103569	0.00808307
RNF103	0.747936	0.192843	3.87847	0.000105114	0.0081578
SEPHS2	0.885013	0.228485	3.8734	0.000107329	0.00828338
PPP2R3A	-1.17018	0.302782	-3.86476	0.000111199	0.00849684
APOLD1	-2.06344	0.53416	-3.86297	0.000112019	0.00849684
ABCA7	-2.00011	0.517767	-3.86296	0.000112022	0.00849684
HOPX	-1.97298	0.510892	-3.86183	0.000112541	0.00849684
VGLL3	-1.65191	0.42817	-3.85806	0.000114289	0.00858216
CYR61	-1.65204	0.428562	-3.85485	0.000115801	0.00858484
NKD1	-2.32781	0.603975	-3.85415	0.000116132	0.00858484
NELL2	-3.54173	0.918962	-3.85405	0.000116178	0.00858484
RCBTB1	1.14999	0.299008	3.84601	0.000120058	0.00882458
SYNE1	-1.45621	0.378809	-3.84419	0.000120952	0.0088435
SLC12A2	1.14731	0.29922	3.83433	0.000125905	0.00915743
KIAA1199	1.53566	0.401463	3.82517	0.000130682	0.00945541
IQCH	-1.61233	0.42377	-3.80472	0.000141965	0.0102185
PGR	-2.36102	0.622113	-3.79516	0.000147551	0.0105659
CERCAM	-1.95543	0.516111	-3.78877	0.000151394	0.0107624
PLOD2	-1.10074	0.290651	-3.78715	0.000152385	0.0107624
NUPR1	-1.93541	0.511097	-3.78677	0.000152619	0.0107624
SLC41A2	0.741427	0.195893	3.78487	0.000153791	0.0107902
CLEC2B	-2.30298	0.609959	-3.77562	0.000159607	0.011142
TP53I11	1.0803	0.286605	3.76929	0.000163709	0.0112767
TCF4	-1.39352	0.369724	-3.7691	0.000163838	0.0112767
PLAU	-1.67119	0.443417	-3.76889	0.000163972	0.0112767
FZD4	-1.76093	0.467717	-3.76494	0.00016659	0.0114003
MXRA7	-1.26368	0.335821	-3.76295	0.000167921	0.0114064
PDLIM3	-1.80539	0.479882	-3.76217	0.000168449	0.0114064
MN1	-1.98044	0.526553	-3.76114	0.000169141	0.0114064
OCLN	0.855341	0.227555	3.75883	0.000170711	0.0114566
C18orf10	-1.07678	0.286654	-3.75638	0.000172386	0.0115134
FAM20A	-2.30617	0.616194	-3.74261	0.000182117	0.0121039
TMEM8B	-2.11814	0.566131	-3.74144	0.00018297	0.0121039
HSPB6	-2.60104	0.695731	-3.73857	0.000185067	0.0121846
LOC644961	-0.679382	0.181798	-3.73701	0.000186224	0.0122025
TCEA2	-2.46464	0.659729	-3.73583	0.000187096	0.0122025
ERG	-2.47809	0.663572	-3.73448	0.000188106	0.012211
OLFML3	-1.92374	0.515327	-3.73304	0.000189185	0.012224
COL14A1	-1.69872	0.45622	-3.72346	0.000196509	0.0126384
IL8	-1.53178	0.412375	-3.71452	0.000203586	0.0130333
MPDZ	-1.60928	0.433547	-3.7119	0.000205711	0.0131089
KCND2	-2.68178	0.722845	-3.71003	0.000207234	0.0131457
MED6	-1.22371	0.330024	-3.70794	0.000208955	0.0131945
A2M	-1.19453	0.322489	-3.70408	0.00021216	0.0133363
FAM49A	-2.57583	0.696956	-3.69583	0.000219171	0.013715
MKRN1	0.628567	0.170226	3.69254	0.000222029	0.01381
AKAP12	-1.35744	0.36773	-3.69141	0.000223018	0.01381
NCOA4	0.473975	0.128428	3.6906	0.000223729	0.01381
PCDH18	-1.50241	0.407218	-3.68945	0.000224741	0.01381
CCDC112	-1.19022	0.322691	-3.68841	0.00022566	0.01381
LOC100507473	-0.722659	0.195998	-3.68707	0.000226847	0.0138218
AMD1	-0.963194	0.261425	-3.6844	0.000229238	0.0139064
LAPTM5	-1.50971	0.410409	-3.67854	0.000234572	0.0141681
GJA1	-1.97948	0.539742	-3.66745	0.000244981	0.0147328
MGST3	0.675727	0.184374	3.66497	0.000247367	0.0148122
ZEB2	-1.45454	0.397054	-3.66333	0.000248953	0.0148431
SERPINH1	-0.986125	0.26928	-3.66207	0.000250182	0.0148527
CD93	-2.0329	0.555624	-3.65876	0.000253439	0.0149074
SNX14	-0.792707	0.216694	-3.65819	0.000254001	0.0149074
CYP2J2	1.58565	0.433561	3.65727	0.000254918	0.0149074
ALDH1A3	-1.6523	0.451845	-3.65679	0.000255397	0.0149074
C6orf165	-3.42566	0.940327	-3.64305	0.00026943	0.0156608
MSR1	-1.71415	0.470988	-3.63948	0.000273192	0.0158133
NRP2	-1.20053	0.329982	-3.63817	0.000274582	0.0158278
MDFIC	-1.11431	0.306575	-3.63472	0.000278282	0.0159747
CALHM2	-2.12189	0.584762	-3.62864	0.000284922	0.0162866
DNAL4	-1.89807	0.523228	-3.62761	0.000286059	0.0162866
NOVA1	-3.94093	1.08696	-3.62566	0.000288225	0.016343
BICC1	-1.29335	0.357167	-3.62114	0.000293305	0.0165628
CTSS	0.95651	0.264222	3.6201	0.000294487	0.0165628
TAF6L	-2.6995	0.747509	-3.61133	0.000304631	0.0170643
SLC40A1	1.12509	0.31181	3.60826	0.000308258	0.0171981
BAZ1B	-0.553644	0.153764	-3.60061	0.000317476	0.0176415
SRSF12	-2.81047	0.780999	-3.59855	0.000319991	0.0177076
PMAIP1	-1.59362	0.443143	-3.59619	0.000322915	0.0177076
FBLN5	-2.00948	0.558897	-3.59543	0.000323851	0.0177076
DGKG	1.99753	0.555907	3.59329	0.000326533	0.0177076
LPPR2	2.4465	0.681095	3.59201	0.000328137	0.0177076
PKIG	-1.71721	0.478092	-3.5918	0.000328407	0.0177076
GFPT2	-2.43539	0.678093	-3.59153	0.000328738	0.0177076
OLFML2A	-2.4931	0.69418	-3.59143	0.000328862	0.0177076
MXRA8	-1.78173	0.496711	-3.58705	0.000334436	0.0179382
MARK1	-2.22422	0.620601	-3.58398	0.000338397	0.0180808
EXOC2	-0.902554	0.251935	-3.58249	0.000340329	0.0181144
IL16	-2.68446	0.749745	-3.5805	0.000342942	0.0181838
NID2	-1.55154	0.433773	-3.57684	0.000347776	0.01837
TRNP1	1.17675	0.32938	3.57261	0.000353441	0.0185985
VLDLR	-1.83654	0.514352	-3.5706	0.000356166	0.0186492
GTDC1	-1.11395	0.312037	-3.56992	0.000357089	0.0186492
NDN	-2.55861	0.717295	-3.56703	0.000361056	0.0187521
PPP1R3C	-1.82661	0.512156	-3.56651	0.00036176	0.0187521
SDC2	-1.41625	0.397865	-3.55961	0.000371401	0.0191756
ACTG1	-0.572124	0.160768	-3.5587	0.00037269	0.0191756
CFL2	-1.49625	0.420724	-3.55636	0.000376026	0.0192758
MFAP4	-1.90404	0.53643	-3.54947	0.000386007	0.0197147
GNG11	-3.00966	0.85059	-3.53833	0.000402674	0.0204906
UBE2E2	-2.03547	0.575906	-3.53439	0.000408722	0.0207225
CPVL	1.77733	0.504008	3.52639	0.000421259	0.0212805
CDH13	-3.16016	0.897271	-3.52197	0.000428353	0.0215604
GPR116	-1.9087	0.542228	-3.52011	0.000431366	0.0215608
ACER2	1.58428	0.450074	3.52005	0.000431465	0.0215608
ZFHX4	-1.94456	0.554047	-3.50974	0.000448543	0.0223202
GLRB	-2.86129	0.815564	-3.50835	0.000450893	0.0223202
LCOR	0.660867	0.188388	3.508	0.000451481	0.0223202
PTRF	-1.39123	0.397124	-3.50325	0.000459609	0.0226415
SATB1	-1.31555	0.376131	-3.49759	0.000469483	0.0229822
FNDC3B	-0.584222	0.167045	-3.49739	0.000469834	0.0229822
RARB	-1.50856	0.431692	-3.49453	0.000474895	0.0231482
LAMA2	-1.3882	0.397677	-3.49077	0.000481624	0.0233233
FLT1	-2.24979	0.644519	-3.49065	0.000481845	0.0233233
APBB2	-0.909854	0.261073	-3.48505	0.000492045	0.0237092
DNAJB4	-1.09973	0.315614	-3.48441	0.00049323	0.0237092
RPL23AP7	-1.7993	0.516772	-3.48181	0.000498046	0.0238581
MAP7D3	-1.64854	0.474212	-3.47638	0.00050823	0.0242623
LRRC55	-4.28262	1.23331	-3.47246	0.000515721	0.0244932
HIPK2	0.857822	0.247118	3.4713	0.000517937	0.0244932
PTGES	-1.67811	0.483453	-3.47109	0.000518357	0.0244932
ZNF138	-1.08616	0.313121	-3.46881	0.000522771	0.0246181
DOLK	-1.10002	0.317458	-3.46508	0.000530069	0.0248774
MPZL2	-0.860757	0.249375	-3.45166	0.000557143	0.0259737
PALM2	-2.26956	0.657528	-3.45165	0.000557166	0.0259737
C1orf88	-2.35872	0.683751	-3.44968	0.000561261	0.026077
CEP120	-0.788337	0.228592	-3.44866	0.000563385	0.0260885
PRCP	-0.915458	0.26587	-3.44325	0.000574764	0.026527
FKBP5	-1.33138	0.387214	-3.43835	0.000585275	0.0269226
PLXNC1	-1.26525	0.36827	-3.43566	0.000591109	0.0271013
SGIP1	-1.88101	0.548472	-3.42955	0.000604578	0.0276276
UNC5CL	1.37629	0.401432	3.42846	0.00060702	0.0276287
CCRL2	1.90689	0.556309	3.42776	0.00060858	0.0276287
S1PR1	-3.16459	0.923685	-3.42605	0.000612423	0.0277127
TPBG	-0.901762	0.263369	-3.42395	0.000617191	0.0278373
BNC2	-1.91556	0.559723	-3.42233	0.000620864	0.0278373
CDC42EP5	1.72721	0.504719	3.42212	0.000621338	0.0278373
PALLD	-0.873804	0.2554	-3.42131	0.000623193	0.0278373
ZDHHC7	0.899876	0.263131	3.41987	0.000626502	0.0278649
CTSE	1.14145	0.333826	3.4193	0.000627822	0.0278649
COPS3	-0.887207	0.259754	-3.41557	0.000636479	0.0281591
PEG10	-1.83914	0.538842	-3.41314	0.000642199	0.0282652
HAS2-AS1	-3.52456	1.033	-3.41196	0.00064497	0.0282652
FAM89B	-1.15917	0.339739	-3.41196	0.00064498	0.0282652
CES2	1.09599	0.321487	3.40914	0.000651689	0.0284694
MRC2	-1.89363	0.555774	-3.4072	0.00065632	0.0285818
EPHB3	1.81553	0.533764	3.40137	0.0006705	0.0291081
NADSYN1	1.05076	0.309077	3.39966	0.000674705	0.0291994
RAB23	-1.25015	0.368128	-3.39597	0.000683852	0.0294387
HEYL	-1.8401	0.541887	-3.39572	0.000684472	0.0294387
SPECC1	-0.991039	0.292023	-3.3937	0.000689551	0.0295656
ISLR	-1.29781	0.382675	-3.39141	0.000695328	0.0296471
SPI1	-3.18492	0.939154	-3.39126	0.00069572	0.0296471
PFN2	-1.42213	0.419786	-3.38774	0.000704708	0.0299382
ANAPC11	-0.751328	0.221848	-3.38668	0.00070744	0.0299627
CDON	-1.47944	0.437398	-3.38236	0.000718653	0.0303451
TRPC6	-2.87877	0.851797	-3.37965	0.000725791	0.0305536
PLXDC1	-1.80287	0.534181	-3.37502	0.000738112	0.0309784
LOC400043	1.77659	0.526861	3.37202	0.00074619	0.0310772
PITX1	1.23655	0.366759	3.37157	0.000747422	0.0310772
TTBK2	-1.31143	0.3891	-3.37041	0.000750572	0.0310772
SLC30A5	0.844166	0.250482	3.37017	0.000751228	0.0310772
PFN1	-0.479238	0.142207	-3.37001	0.000751652	0.0310772
SAA2	-2.83355	0.842237	-3.36431	0.000767342	0.0315452
GLIS2	-1.48115	0.440261	-3.36425	0.000767512	0.0315452
GNE	-1.03017	0.306388	-3.36232	0.000772907	0.0315626
LGALS3	0.671788	0.199823	3.36191	0.000774047	0.0315626
KIAA1211	1.18272	0.351825	3.36166	0.000774751	0.0315626
BCCIP	0.821071	0.244737	3.35491	0.000793896	0.032248
RTKN2	-1.27091	0.379147	-3.35202	0.000802232	0.0324571
ARHGAP29	-1.19591	0.356828	-3.35151	0.000803717	0.0324571
ZNF469	-2.36929	0.707537	-3.34864	0.000812094	0.0326855
H19	-1.79201	0.535254	-3.34796	0.000814078	0.0326855
TEAD1	-0.517609	0.154799	-3.34375	0.000826529	0.0330897
DOCK4	-1.23232	0.368751	-3.34188	0.000832131	0.033211
PPFIBP1	-0.705424	0.211132	-3.34114	0.000834339	0.033211
CCNG2	-1.03051	0.308604	-3.33927	0.000839995	0.0333
PTPRC	-1.43731	0.430565	-3.3382	0.000843217	0.0333
PRKD1	-2.075	0.621672	-3.33778	0.000844518	0.0333
OSBPL6	-2.68306	0.803986	-3.3372	0.000846266	0.0333
RP2	0.721926	0.216449	3.33531	0.000852031	0.0333
MAFB	-1.68513	0.505344	-3.33463	0.000854145	0.0333
PANK3	0.674658	0.202347	3.33416	0.000855585	0.0333
KBTBD7	1.28778	0.386246	3.3341	0.000855753	0.0333
HMHA1	-2.38522	0.71661	-3.32848	0.000873209	0.0338844
LOC389602	1.59277	0.479046	3.32489	0.000884545	0.0342287
IGLL5	-2.07662	0.624913	-3.32306	0.000890366	0.0343582
MAP1A	-1.63641	0.492623	-3.32183	0.000894304	0.0344146
SERAC1	-1.29599	0.390748	-3.31669	0.000910907	0.0349567
SERPINF1	-1.2772	0.385193	-3.31574	0.000914001	0.0349788
RPP38	0.879001	0.265232	3.31408	0.000919451	0.0349801
DUSP1	-1.22863	0.370779	-3.31365	0.000920876	0.0349801
CD164	0.689579	0.208116	3.31343	0.000921589	0.0349801
TYROBP	-1.65973	0.501404	-3.31017	0.0009324	0.035294
F2RL2	-1.62483	0.492268	-3.3007	0.000964432	0.0364073
ADH1C	2.10392	0.637763	3.29891	0.000970608	0.0365411
TCTN1	-1.00179	0.304004	-3.29531	0.000983116	0.036912
DENND5A	-1.13535	0.344711	-3.29362	0.000989072	0.0369737
LOC100505761	1.62247	0.492654	3.29333	0.000990081	0.0369737
TFF1	1.68383	0.511592	3.29136	0.000997043	0.0371338
SALL2	-2.95977	0.899708	-3.28971	0.00100292	0.0371774
C3	-1.68501	0.512258	-3.28937	0.00100411	0.0371774
GJA5	-3.18054	0.967089	-3.28878	0.00100624	0.0371774
ADAMTS1	-2.39273	0.727979	-3.2868	0.00101331	0.0373393
CLK1	-0.769436	0.234435	-3.28208	0.00103043	0.0378142
MAK16	-0.90989	0.277257	-3.28175	0.00103164	0.0378142
OGDH	0.702855	0.214245	3.28061	0.00103583	0.0378211
TGM2	-1.08043	0.329377	-3.28022	0.00103728	0.0378211
PCBD2	1.2781	0.389757	3.27921	0.00104097	0.0378564
INPP5A	0.87913	0.268316	3.27647	0.00105114	0.0381265
LNX1	0.914182	0.279093	3.27554	0.00105459	0.038152
MARCKS	-0.703049	0.214847	-3.27232	0.00106667	0.038351
STMN2	-2.07121	0.633078	-3.27165	0.00106923	0.038351
DIO3	-2.55157	0.780162	-3.27057	0.00107332	0.038351
HSPA13	-0.89183	0.272685	-3.27055	0.0010734	0.038351
RANBP6	-1.09936	0.336154	-3.27042	0.00107389	0.038351
ANGPTL2	-1.39663	0.427273	-3.2687	0.00108044	0.0384858
RHOT2	-1.39056	0.42572	-3.26638	0.00108934	0.0387035
TMEM163	1.56162	0.478377	3.26441	0.00109691	0.038873
NR4A3	-1.84365	0.565896	-3.25793	0.00112228	0.0396712
BCL2L14	1.32488	0.406986	3.25533	0.00113259	0.0399338
PCDHB6	-3.16799	0.97343	-3.25446	0.00113608	0.0399554
CD36	-2.63001	0.808461	-3.2531	0.00114153	0.0399715
CITED2	-1.05892	0.325531	-3.25291	0.00114229	0.0399715
FJX1	-2.5417	0.782424	-3.2485	0.00116017	0.0404585
ESR1	-3.93994	1.21326	-3.2474	0.00116463	0.0404585
TMEM204	-2.6568	0.818149	-3.24733	0.00116494	0.0404585
GAPDH	-0.603515	0.185998	-3.24474	0.00117559	0.0407265
SFRP1	-2.17317	0.67043	-3.24146	0.0011892	0.0410173
C4B	-3.42821	1.05767	-3.24129	0.00118989	0.0410173
PLVAP	-2.49677	0.77106	-3.2381	0.00120328	0.04128
RHOBTB3	-1.15236	0.355878	-3.23806	0.00120345	0.04128
BLNK	1.14283	0.353019	3.23731	0.00120664	0.0412873
GPCPD1	-0.9658	0.298546	-3.23501	0.00121638	0.0414634
GLT8D2	-1.90805	0.589873	-3.23469	0.00121776	0.0414634
ZNF680	-0.914294	0.282737	-3.23373	0.00122187	0.0415017
EVC2	-3.54841	1.09868	-3.2297	0.00123922	0.0419884
INPPL1	-1.12351	0.347989	-3.22859	0.00124404	0.0420492
TLR1	-1.27908	0.3963	-3.22757	0.00124848	0.0420969
MPND	2.15291	0.668644	3.21981	0.00128275	0.0431015
HSPA4L	-1.42094	0.441493	-3.21849	0.0012887	0.0431015
MSRB3	-1.44919	0.450372	-3.21777	0.0012919	0.0431015
GAS2L1	-2.3041	0.716119	-3.21748	0.00129323	0.0431015
LRRC66	1.66935	0.518857	3.21735	0.00129379	0.0431015
C5orf30	1.16709	0.362914	3.21588	0.00130046	0.0432199
RASGRF1	-3.06497	0.954456	-3.21122	0.00132173	0.0438221
MIR100HG	-1.65141	0.514942	-3.20699	0.00134132	0.0443658
ATP7B	1.36828	0.427491	3.20073	0.0013708	0.045233
NQO1	0.748832	0.234009	3.20002	0.0013742	0.0452378
USH1C	1.0111	0.316319	3.19644	0.00139135	0.0456943
EPHA3	-1.53728	0.481316	-3.19392	0.00140356	0.0458072
PMP22	-1.16467	0.36469	-3.1936	0.00140513	0.0458072
TMEM200A	-1.5159	0.474692	-3.19344	0.00140587	0.0458072
MCU	0.685385	0.214652	3.19301	0.00140798	0.0458072
CYP2C18	1.29586	0.406039	3.19147	0.00141551	0.0459395
PYCR2	1.04861	0.328633	3.19083	0.00141866	0.0459395
PRG4	-2.54538	0.798055	-3.18948	0.00142527	0.0460462
TFPI2	-3.36465	1.05523	-3.18855	0.0014299	0.046074
SIK1	-1.10071	0.345271	-3.18797	0.00143276	0.046074
CLEC14A	-3.65657	1.14726	-3.18721	0.00143651	0.0460878
MMP2	-1.28395	0.403416	-3.1827	0.00145909	0.0467043
LCK	2.33668	0.734375	3.18186	0.00146331	0.0467319
ADAM17	-0.739217	0.232518	-3.17918	0.00147692	0.0470582
LPAR1	-1.22058	0.384023	-3.17841	0.00148084	0.0470752
LOC400657	-1.72182	0.542139	-3.17598	0.0014933	0.047363
SH3BP5	-1.09204	0.343961	-3.1749	0.00149888	0.0474316
SFRP2	-1.03342	0.326023	-3.16977	0.00152562	0.0480236
B3GALT2	-1.17478	0.37062	-3.16976	0.00152562	0.0480236
C9orf125	1.06825	0.337059	3.16932	0.00152796	0.0480236
FCGR3A	-1.59759	0.504221	-3.16844	0.00153261	0.0480611
CALD1	-0.898552	0.284045	-3.16342	0.00155929	0.0487875
AACS	1.19233	0.377278	3.16034	0.00157584	0.0491944
C1QC	-1.66724	0.528741	-3.15323	0.00161477	0.050202
SPON2	-1.47866	0.468952	-3.15312	0.00161534	0.050202
ASPN	-1.21058	0.384022	-3.15238	0.00161944	0.050217
PKHD1	-1.81558	0.576435	-3.14966	0.00163459	0.0505738
ANXA4	0.727869	0.23116	3.14877	0.00163957	0.0506152
SLC6A20	1.19482	0.380017	3.14411	0.00166592	0.0513147
PYGL	-1.51988	0.483572	-3.14302	0.00167212	0.0513919
LGR4	0.635529	0.202264	3.14208	0.00167754	0.0514445
ISPD	-1.543	0.491531	-3.13917	0.00169427	0.0518431
LOC283104	-1.67324	0.533633	-3.13556	0.00171524	0.0523693
SLC19A3	2.57957	0.822935	3.13459	0.00172094	0.0524281
REL	-0.924028	0.294853	-3.13386	0.00172522	0.0524436
SLC1A3	-1.80795	0.57715	-3.13255	0.00173295	0.0525638
BGN	-1.0095	0.322363	-3.13158	0.00173869	0.0526228
SLC6A16	-3.67074	1.17351	-3.12802	0.0017599	0.0531491
LPHN2	-1.25267	0.400806	-3.12537	0.00177581	0.0534281
PRSS1	2.05449	0.657394	3.1252	0.00177683	0.0534281
FGR	-2.73959	0.876936	-3.12405	0.00178383	0.0534968
GUCY1A2	-2.67738	0.857293	-3.12306	0.00178981	0.0534968
S100A8	-3.30136	1.05714	-3.12292	0.00179067	0.0534968
CRMP1	-2.88718	0.92568	-3.11898	0.00181479	0.0541009
MMP15	1.21801	0.390978	3.1153	0.0018376	0.0546637
PPAP2B	-1.03967	0.334069	-3.11213	0.00185742	0.0551353
SMPD3	1.49685	0.481249	3.11034	0.0018687	0.0553518
CLIP4	-0.997952	0.321117	-3.10776	0.00188514	0.0556497
SPIN4	-0.917628	0.295295	-3.1075	0.00188677	0.0556497
TEC	-1.33494	0.429859	-3.10553	0.00189936	0.0559023
GPS1	-0.883363	0.28461	-3.10377	0.00191071	0.0560206
MECOM	0.720851	0.232259	3.10366	0.00191144	0.0560206
EDNRA	-1.44709	0.466359	-3.10296	0.00191595	0.0560343
CD14	-1.77117	0.571091	-3.10139	0.00192614	0.0561346
DAAM2	-2.56253	0.826468	-3.10058	0.00193145	0.0561346
RNF180	-1.62197	0.523156	-3.10036	0.00193289	0.0561346
ARPC5	0.561386	0.181095	3.09995	0.00193554	0.0561346
UBE2L3	-0.668821	0.215846	-3.0986	0.00194439	0.056274
ABHD13	0.784163	0.253403	3.09453	0.00197123	0.0567673
IGANRP	-2.51833	0.813961	-3.09392	0.00197532	0.0567673
VAT1	-0.832943	0.269278	-3.09324	0.00197983	0.0567673
CLIP1	-0.661353	0.213817	-3.09308	0.00198092	0.0567673
LOC441666	-2.02775	0.655948	-3.09132	0.00199268	0.0567673
FXR1	-0.501677	0.162305	-3.09096	0.00199511	0.0567673
DNAH11	-2.20696	0.714183	-3.09019	0.00200031	0.0567673
ALDH2	0.833061	0.269604	3.08994	0.00200198	0.0567673
TUBB3	-1.51029	0.488793	-3.08984	0.00200264	0.0567673
TNC	-1.87024	0.605419	-3.08916	0.00200721	0.0567673
STRA6	-2.3098	0.747801	-3.0888	0.00200969	0.0567673
IGJ	-2.11922	0.686126	-3.08868	0.00201047	0.0567673
COL4A3	-2.07891	0.673402	-3.08717	0.0020207	0.0569403
DGKI	-3.76791	1.22193	-3.08357	0.00204531	0.057517
GTF2B	0.680246	0.220718	3.08198	0.00205631	0.0577095
FZD8	-2.05637	0.667572	-3.08036	0.00206747	0.0579059
SEMA3D	-2.60191	0.845307	-3.07806	0.00208351	0.0581241
OTUB1	-0.914296	0.297038	-3.07805	0.00208363	0.0581241
BAG3	-0.799414	0.260024	-3.07439	0.00210936	0.0586811
B4GALT1	-0.613565	0.199633	-3.07347	0.00211588	0.0586811
SAT1	-0.815967	0.265492	-3.07341	0.00211627	0.0586811
PLCL1	-2.09662	0.682647	-3.0713	0.00213126	0.0588768
DTNA	-2.22552	0.724758	-3.0707	0.00213555	0.0588768
SLC34A2	-1.89329	0.616613	-3.07047	0.00213725	0.0588768
FOXO1	-0.721469	0.235051	-3.06941	0.00214479	0.0588768
ECM1	1.39714	0.455246	3.06897	0.00214798	0.0588768
PDGFRA	-1.10612	0.360451	-3.06872	0.00214976	0.0588768
HINT3	-0.862544	0.281134	-3.06808	0.00215436	0.0588768
NEGR1	-1.78782	0.583001	-3.06657	0.00216528	0.0588768
RGPD3	-1.54417	0.503654	-3.06593	0.00216996	0.0588768
HMOX1	-1.77201	0.578083	-3.06532	0.00217439	0.0588768
ABCA6	-1.69757	0.553845	-3.06506	0.00217625	0.0588768
RAB7A	-0.447047	0.14587	-3.06469	0.00217895	0.0588768
EDARADD	-1.05567	0.344491	-3.06444	0.00218075	0.0588768
VEZF1	-0.414331	0.135235	-3.06379	0.00218549	0.0588768
LRRC4C	-2.90159	0.947116	-3.0636	0.0021869	0.0588768
APOD	-1.41075	0.460769	-3.06172	0.00220067	0.059133
TCEAL7	-3.49839	1.14412	-3.05773	0.00223024	0.0598087
RBP1	-1.55881	0.509889	-3.05716	0.00223443	0.0598087
TRMT2A	-1.5424	0.505082	-3.05376	0.00225995	0.0603755
CCDC14	-0.703567	0.23047	-3.05276	0.0022675	0.0604607
LGALS4	1.1249	0.368789	3.05027	0.00228638	0.0607556
DOPEY2	0.8859	0.290445	3.05015	0.0022873	0.0607556
SBDSP1	-0.910674	0.298638	-3.04942	0.00229284	0.0607864
SYT7	-2.31288	0.758881	-3.04774	0.00230566	0.0610099
NOTCH3	-0.990661	0.325261	-3.04574	0.00232105	0.0613005
TGFB3	-1.52716	0.501693	-3.04401	0.00233446	0.0615376
PHTF2	-0.939664	0.308974	-3.04124	0.00235605	0.0619892
LIPA	0.700556	0.230492	3.03939	0.0023706	0.0621116
SRPR	-0.534937	0.17602	-3.03907	0.00237308	0.0621116
HPS5	-0.756578	0.248961	-3.03894	0.00237412	0.0621116
ZBTB38	-0.446329	0.14703	-3.03562	0.00240042	0.0626815
MLK7-AS1	1.75283	0.577595	3.03471	0.00240768	0.0627532
XKR9	1.35767	0.447619	3.0331	0.00242053	0.0629699
ARHGEF5	0.974233	0.321449	3.03075	0.00243946	0.0633439
RPS6KA2	-0.879012	0.290308	-3.02786	0.00246292	0.0637659
TM6SF1	-1.79661	0.593408	-3.02762	0.00246489	0.0637659
SLC15A2	-1.56924	0.51858	-3.02603	0.00247788	0.0639828
FLJ31306	-0.819357	0.270873	-3.02488	0.00248733	0.0641075
FLJ42709	-2.01291	0.665924	-3.02273	0.00250508	0.0642105
SUSD2	-2.09879	0.694369	-3.02259	0.0025062	0.0642105
SPCS2	-0.725561	0.240047	-3.02258	0.00250626	0.0642105
GNG7	2.55276	0.844681	3.02216	0.00250981	0.0642105
LOC641298	-1.1688	0.38684	-3.02141	0.00251599	0.0642502
SPG21	0.832944	0.275836	3.01971	0.00253021	0.0644947
SLAMF6	1.64986	0.546523	3.01883	0.00253752	0.0645628
ELOVL5	-0.831493	0.275747	-3.01542	0.00256624	0.065174
NT5DC2	-1.40665	0.466627	-3.0145	0.00257401	0.0652521
TIMP3	-1.12894	0.374747	-3.01254	0.00259071	0.0655558
CCDC80	-0.936204	0.310828	-3.01197	0.00259556	0.0655591
ATXN10	-0.840912	0.279588	-3.00768	0.00263246	0.0663705
DKK3	-1.14245	0.379977	-3.00663	0.00264165	0.0664815
KIAA1161	1.07846	0.359039	3.00373	0.00266696	0.0669972
GADD45B	-1.3082	0.435843	-3.00154	0.00268615	0.0671607
FUT8	0.65868	0.219448	3.00153	0.00268626	0.0671607
EDEM3	0.694328	0.23134	3.00134	0.00268797	0.0671607
GSDMB	1.26997	0.423333	2.99994	0.00270032	0.0672113
C5orf13	-0.964374	0.321501	-2.9996	0.00270332	0.0672113
DSC3	-2.70068	0.900386	-2.99947	0.00270452	0.0672113
GNAI2	-0.722545	0.241059	-2.99738	0.0027231	0.0675524
EXOC5	-0.494677	0.16535	-2.9917	0.00277425	0.0686984
MLLT11	-1.57531	0.526656	-2.99115	0.00277927	0.0687003
ABP1	1.22953	0.411576	2.98736	0.00281398	0.0694349
SLFN12L	-2.66649	0.892841	-2.98652	0.00282173	0.0695026
FBXL12	1.2384	0.415053	2.98372	0.00284764	0.0700167
SLC46A3	1.02965	0.345233	2.98249	0.00285919	0.0701764
ANG	0.988799	0.331638	2.98156	0.00286785	0.0702648
CD80	-3.06068	1.02816	-2.97686	0.00291217	0.0712252
SAA1	-2.69247	0.90524	-2.97432	0.00293637	0.0716907
PEA15	-0.635743	0.213827	-2.97317	0.00294744	0.0718347
FBXO32	-0.90732	0.305252	-2.97237	0.00295514	0.0718962
MYRIP	-2.4886	0.838103	-2.96932	0.0029846	0.072486
MME	-1.98933	0.670232	-2.96812	0.00299626	0.0726422
ATP6V1E1	-0.567849	0.191463	-2.96584	0.00301855	0.0730552
C6orf89	-0.696793	0.235029	-2.96471	0.00302973	0.0731983
SLC29A3	1.0325	0.348362	2.96386	0.00303808	0.0732726
CXorf36	-4.17001	1.4076	-2.9625	0.00305152	0.0734692
STAC	-3.8059	1.28753	-2.95598	0.00311678	0.0749107
NES	-1.79671	0.608678	-2.95183	0.003159	0.0756596
NNMT	-1.0701	0.362556	-2.95153	0.00316203	0.0756596
LDHB	-1.52764	0.517614	-2.95131	0.00316428	0.0756596
OLFM2	-2.51999	0.854163	-2.95025	0.00317517	0.0757894
TRPC1	-1.32856	0.450477	-2.94924	0.0031856	0.0759079
SEMA5A	-1.34193	0.455138	-2.94839	0.00319431	0.0759853
SPSB1	-1.05148	0.356798	-2.947	0.0032087	0.0760376
APLP1	-2.6101	0.886011	-2.9459	0.00322013	0.0760376
PCSK5	1.23581	0.419753	2.94414	0.00323857	0.0760376
LIN7A	-2.53294	0.860357	-2.94406	0.00323939	0.0760376
THG1L	1.09027	0.370343	2.94396	0.00324043	0.0760376
TTC14	-0.910996	0.309454	-2.94388	0.00324123	0.0760376
TSC22D3	-1.33944	0.455017	-2.94371	0.00324309	0.0760376
ITM2A	-2.44143	0.829471	-2.94336	0.00324671	0.0760376
EMP1	-0.905016	0.307527	-2.94288	0.00325172	0.0760376
SMG5	-0.851574	0.289383	-2.94273	0.00325335	0.0760376
WWP2	0.886447	0.301266	2.94241	0.00325672	0.0760376
CALML4	0.742794	0.252677	2.93969	0.0032854	0.0765114
TBC1D25	-1.12066	0.381249	-2.93944	0.00328803	0.0765114
RALGPS1	0.804588	0.273805	2.93855	0.00329755	0.0765745
POSTN	-1.03312	0.351622	-2.93815	0.00330176	0.0765745
IL7R	-1.99726	0.679927	-2.93747	0.00330903	0.0766152
LOC374443	-1.76383	0.600689	-2.93634	0.00332107	0.0766438
FGL2	-1.1728	0.399416	-2.93629	0.00332161	0.0766438
RTP4	1.33401	0.454395	2.93581	0.00332682	0.0766438
RNF217	-1.42812	0.486626	-2.93474	0.00333829	0.0767807
RABGGTA	1.07721	0.367141	2.93404	0.00334579	0.0768261
WHSC1	-0.674914	0.23008	-2.93339	0.00335285	0.0768611
CPNE5	2.91353	0.993529	2.93251	0.00336234	0.0769515
PLEKHB1	1.11282	0.379623	2.93138	0.00337464	0.0771061
SEMA3E	-2.3214	0.792276	-2.93004	0.00338919	0.0773114
TRIT1	-1.02704	0.350682	-2.9287	0.00340382	0.0775177
NAMPT	-0.710104	0.242584	-2.92725	0.00341973	0.0777528
LAMB2	-0.917875	0.313729	-2.92569	0.00343691	0.0778301
MEX3A	-1.69727	0.580137	-2.92564	0.00343752	0.0778301
LOC728613	1.75994	0.601604	2.92542	0.00343994	0.0778301
AXL	-1.19896	0.410088	-2.92367	0.00345933	0.0781414
TMLHE	0.892295	0.305268	2.92299	0.00346685	0.0781722
CAPN6	1.8491	0.632703	2.92254	0.00347194	0.0781722
NR4A2	-1.17593	0.402629	-2.92064	0.00349311	0.0785215
FKBP10	-1.40892	0.482933	-2.91743	0.00352931	0.0790877
TRPC4	-2.77085	0.949893	-2.91702	0.00353396	0.0790877
SEMA3F	-1.74923	0.599695	-2.91687	0.00353566	0.0790877
CCDC144A	-2.04187	0.700136	-2.91639	0.00354107	0.0790877
ELFN1	-3.69171	1.2672	-2.91329	0.00357646	0.079574
SULF1	-0.964562	0.3311	-2.91321	0.00357735	0.079574
AIG1	-0.788056	0.270543	-2.91286	0.00358131	0.079574
DNAJC22	1.24737	0.428286	2.91248	0.00358576	0.079574
VEGFA	-0.771272	0.264938	-2.91114	0.00360108	0.0797704
SLC44A3	0.698249	0.239892	2.91068	0.00360648	0.0797704
TRIM11	1.54405	0.530623	2.90988	0.00361563	0.0797704
NAV3	-1.71637	0.589876	-2.90972	0.00361758	0.0797704
CCDC90B	-0.719345	0.247413	-2.90746	0.00364377	0.0802103
RUNX2	-1.11939	0.385068	-2.90701	0.00364907	0.0802103
ECHDC2	1.51941	0.523012	2.90511	0.00367128	0.080571
SIM2	1.18409	0.407715	2.90421	0.00368184	0.0806753
SCAMP4	0.899668	0.310033	2.90185	0.00370971	0.081133
H2AFZ	-0.633635	0.218386	-2.90145	0.00371441	0.081133
KRT23	-1.67854	0.578679	-2.90064	0.00372398	0.0811725
CSDA	-0.643378	0.221866	-2.89985	0.0037334	0.0811725
GCNT3	0.987851	0.340659	2.89982	0.00373375	0.0811725
KRT17	-1.55093	0.535271	-2.89747	0.00376185	0.0816557
FPR1	-3.03257	1.04759	-2.89481	0.00379394	0.0822236
INTS8	-0.654726	0.226212	-2.89431	0.00379998	0.0822263
STX2	-0.990757	0.342492	-2.89278	0.00381843	0.0823708
LSP1	-2.43838	0.842964	-2.89263	0.00382033	0.0823708
DSEL	-1.65782	0.573366	-2.89138	0.00383549	0.0823708
PUS10	-0.91069	0.315025	-2.89085	0.00384196	0.0823708
ACTA2	-0.839749	0.290491	-2.89079	0.00384276	0.0823708
ABCA1	-0.858028	0.296862	-2.89033	0.00384843	0.0823708
MPRIP	-0.74922	0.259303	-2.88936	0.00386022	0.0823708
HAUS7	-2.04446	0.707582	-2.88936	0.00386027	0.0823708
MYCT1	-2.52352	0.873635	-2.88853	0.00387048	0.0823708
SPRY1	-0.741163	0.25661	-2.88829	0.00387345	0.0823708
C11orf54	0.806713	0.279309	2.88825	0.0038739	0.0823708
CACNA1H	-2.28312	0.790834	-2.88698	0.00388956	0.0823708
LDLRAD3	-1.67329	0.579604	-2.88695	0.00388994	0.0823708
TMEM8A	0.768123	0.266136	2.8862	0.00389924	0.0823708
NSUN3	1.11894	0.387729	2.88589	0.0039031	0.0823708
NAB2	-1.52483	0.528468	-2.88537	0.00390953	0.0823708
CHST11	-1.02085	0.353813	-2.88527	0.00391074	0.0823708
PMM1	-1.96949	0.682652	-2.88505	0.00391345	0.0823708
LAP3	0.685403	0.237609	2.88458	0.00391931	0.0823708
KIAA1586	-1.33781	0.464271	-2.88152	0.00395758	0.0827404
MRAS	-1.45726	0.505772	-2.88127	0.00396076	0.0827404
BCL2L11	-0.802436	0.278566	-2.8806	0.00396921	0.0827404
RN7SK	-0.617685	0.214449	-2.88033	0.00397253	0.0827404
CD180	-2.54787	0.884637	-2.88013	0.00397515	0.0827404
KAT5	-1.39223	0.483419	-2.87996	0.00397726	0.0827404
BEND6	-3.16088	1.09758	-2.87985	0.00397859	0.0827404
TBC1D8B	0.665563	0.231287	2.87766	0.00400641	0.0831264
TFF2	1.46663	0.509698	2.87744	0.00400912	0.0831264
FST	-2.81382	0.978556	-2.87548	0.00403415	0.0835207
PCNXL3	-0.76575	0.266525	-2.87309	0.00406476	0.0840293
ZNF876P	-2.01677	0.703173	-2.86809	0.00412953	0.0852278
PRKAA1	0.381883	0.133168	2.86767	0.00413501	0.0852278
DZIP1	-1.28758	0.449322	-2.8656	0.00416216	0.0856604
DNAH5	-1.05008	0.366523	-2.86497	0.00417051	0.0857052
SPTSSA	-0.858087	0.299604	-2.86407	0.00418231	0.0858208
RCN3	-1.8884	0.659476	-2.86348	0.00419011	0.0858539
OLFML1	-1.7441	0.609376	-2.86211	0.00420828	0.0860993
PDE4B	-1.47557	0.515697	-2.86132	0.00421883	0.0861882
MLKL	0.802429	0.280636	2.85932	0.00424544	0.0864501
DPP8	-0.655132	0.229133	-2.85919	0.00424731	0.0864501
TNFSF12	-1.4667	0.51302	-2.85896	0.00425032	0.0864501
SPINK5	1.41901	0.496683	2.85698	0.00427698	0.0868651
CCDC67	-2.71228	0.949572	-2.85632	0.00428578	0.0868737
GNG4	-3.57555	1.25193	-2.85602	0.0042899	0.0868737
ABCF1	-0.692146	0.242386	-2.85555	0.00429622	0.086875
FAM195B	-1.57904	0.553305	-2.85383	0.00431963	0.0871638
THOC1	0.835815	0.292901	2.85357	0.00432305	0.0871638
LOC100506119	-2.4083	0.844168	-2.85287	0.00433263	0.0871874
KLHL13	-2.58455	0.906044	-2.85257	0.00433678	0.0871874
HCK	-2.38684	0.837427	-2.85021	0.00436906	0.087605
PIK3AP1	0.895638	0.314245	2.85013	0.00437016	0.087605
OLFM1	-2.69946	0.947931	-2.84774	0.00440309	0.0880905
STARD3	-1.07631	0.377999	-2.8474	0.00440786	0.0880905
FUT4	0.786947	0.276445	2.84666	0.004418	0.0880905
PDE5A	-0.740662	0.260201	-2.8465	0.00442028	0.0880905
ADAMTS4	-2.52172	0.886088	-2.84591	0.00442851	0.0880905
AMIGO2	-1.03523	0.36386	-2.84514	0.00443915	0.0880905
STRN3	-0.58562	0.205917	-2.84396	0.00445567	0.0880905
C1orf162	-2.19771	0.772952	-2.84327	0.00446528	0.0880905
GAS7	-1.28206	0.450931	-2.84315	0.00446707	0.0880905
CLEC7A	-2.42566	0.853163	-2.84314	0.00446721	0.0880905
KCNQ3	-2.01719	0.70951	-2.84308	0.00446804	0.0880905
TLR7	2.60696	0.917007	2.8429	0.00447047	0.0880905
PKIB	-1.55167	0.546579	-2.83887	0.0045273	0.088893
IER5	-1.25134	0.440826	-2.83863	0.00453082	0.088893
LINC00472	-1.25977	0.443803	-2.83858	0.00453148	0.088893
SLC39A14	0.756625	0.266586	2.83821	0.00453679	0.088893
ITGB1	-0.559562	0.197334	-2.83562	0.00457373	0.0894531
NASP	-0.680933	0.240163	-2.8353	0.00457826	0.0894531
ATE1	0.620755	0.218977	2.83479	0.00458557	0.0894702
TJP3	1.01896	0.359681	2.83296	0.00461185	0.0898566
TCP1	-0.495164	0.174864	-2.83171	0.00462995	0.0899959
CCDC30	-1.82567	0.644756	-2.83157	0.00463195	0.0899959
ENPP5	-1.37095	0.484254	-2.83105	0.00463958	0.0900182
BCAP29	-0.550278	0.194541	-2.8286	0.00467523	0.0905834
SLC7A2	-1.5288	0.540591	-2.82802	0.00468366	0.0906202
USP20	-1.56938	0.555302	-2.82618	0.00471065	0.090908
MSN	-0.723377	0.255961	-2.82612	0.00471161	0.090908
WDR11	0.567181	0.200834	2.82413	0.00474092	0.0913465
TLR6	-1.28683	0.455926	-2.82245	0.0047658	0.0916179
TULP4	-0.610727	0.2164	-2.82222	0.00476925	0.0916179
AEBP1	-1.0631	0.376784	-2.82151	0.00477983	0.0916179
TMEM26	-2.67288	0.947412	-2.82124	0.00478377	0.0916179
TGFBI	-1.18554	0.420261	-2.82096	0.00478798	0.0916179
GALNT6	1.06506	0.377685	2.81997	0.00480277	0.0917745
RBL2	-0.497143	0.176353	-2.81902	0.00481699	0.0917749
DCAF15	1.57405	0.55838	2.81896	0.00481792	0.0917749
HMGN5	-1.06837	0.379036	-2.81865	0.00482261	0.0917749
SLC14A1	2.68909	0.954683	2.81674	0.00485141	0.0920836
FCGR3B	-2.41623	0.857902	-2.81644	0.00485591	0.0920836
KLHL4	-3.65694	1.29851	-2.81625	0.00485872	0.0920836
C1QB	-1.69547	0.602251	-2.81523	0.0048743	0.0921281
ECM2	-1.17202	0.416316	-2.81522	0.00487432	0.0921281
OXTR	-1.78106	0.633024	-2.81357	0.00489952	0.0924785
NID1	-1.01709	0.36161	-2.81267	0.00491322	0.0925236
FHDC1	1.09403	0.389044	2.81209	0.00492203	0.0925236
MTRNR2L2	-0.847672	0.301446	-2.81202	0.00492312	0.0925236
ABCA12	-1.20571	0.428859	-2.81144	0.00493199	0.0925236
ATP8A1	0.979413	0.348393	2.81123	0.00493521	0.0925236
SOX9	0.536704	0.190995	2.81004	0.00495346	0.0927405
EFHD1	-2.65056	0.943433	-2.80949	0.00496206	0.0927528
ZNF322	-0.893021	0.317899	-2.80914	0.00496747	0.0927528
CCRL1	1.46399	0.521581	2.80684	0.00500299	0.0932906
TNIP3	-3.13252	1.1162	-2.8064	0.00500981	0.0932927
TTC19	-0.734009	0.261735	-2.80439	0.00504117	0.0937095
C3AR1	-1.70668	0.608672	-2.80393	0.00504835	0.0937095
PLAT	-1.34879	0.48108	-2.80367	0.00505244	0.0937095
OCIAD2	0.611881	0.218323	2.80265	0.00506849	0.0937985
FAM83A	-1.77207	0.632383	-2.80222	0.00507526	0.0937985
PTPRM	-1.10779	0.395348	-2.80208	0.00507749	0.0937985
CA13	0.862139	0.307788	2.80108	0.00509325	0.0939646
MPEG1	-1.28796	0.459928	-2.80036	0.00510458	0.0940488
ANGPT1	-2.31613	0.828396	-2.79593	0.00517513	0.0951123
IL18R1	1.47231	0.5266	2.79587	0.00517599	0.0951123
PAPPA	-1.38989	0.497291	-2.79491	0.00519138	0.0952285
TMOD1	-2.21197	0.791547	-2.79449	0.00519809	0.0952285
GLIS3	-0.845593	0.30264	-2.79405	0.00520522	0.0952285
ZFAND3	-0.582577	0.208527	-2.79377	0.00520974	0.0952285
YTHDC1	-0.518994	0.185849	-2.79256	0.00522932	0.0954608
MOB1B	-0.686822	0.246239	-2.78925	0.00528307	0.0963155
GRIA3	-2.02872	0.727891	-2.78712	0.00531788	0.0967059
CCDC50	-0.667834	0.239617	-2.78709	0.00531841	0.0967059
TXNDC12	0.46823	0.168225	2.78335	0.00538004	0.0976988
OSGIN2	-0.773345	0.277952	-2.7823	0.00539755	0.0977971
HIVEP2	-0.642795	0.231049	-2.78207	0.00540126	0.0977971
SHISA2	1.48774	0.534821	2.78176	0.00540658	0.0977971
DEFB1	-1.69994	0.611834	-2.77844	0.00546207	0.0985762
ERP27	-2.26919	0.816745	-2.77833	0.00546384	0.0985762
H6PD	-0.926462	0.333671	-2.77658	0.0054935	0.0989827
GLUL	-0.7678	0.276606	-2.77579	0.00550677	0.0990933
ACSL5	0.718182	0.258956	2.77337	0.00554782	0.0995809
KCTD21	0.938211	0.338295	2.77335	0.0055482	0.0995809
SEL1L3	0.485967	0.175376	2.771	0.00558851	0.10008
RAB11FIP3	-1.43432	0.517709	-2.77052	0.00559667	0.10008
ZNF532	-0.795247	0.287057	-2.77035	0.00559965	0.10008
PIGZ	-2.09979	0.758033	-2.77005	0.00560482	0.10008
PLLP	0.913183	0.329717	2.7696	0.00561259	0.10009
SPARC	-0.854986	0.308809	-2.76866	0.00562879	0.10025
CXCL16	0.640389	0.231386	2.76763	0.00564663	0.100375
GABARAPL1	-1.0669	0.385553	-2.76719	0.0056542	0.100375
PTBP2	-0.874392	0.316007	-2.767	0.00565747	0.100375
PKDCC	1.11082	0.401607	2.76594	0.00567592	0.100574
HIST1H2BC	-0.577069	0.208759	-2.76429	0.00570471	0.100955
BACE2	0.636773	0.230402	2.76375	0.00571407	0.100992
RBMS1	-0.545513	0.197419	-2.76322	0.00572342	0.101029
CD40	1.45633	0.527153	2.76263	0.00573372	0.101082
GDPD5	-1.93901	0.702046	-2.76194	0.00574597	0.10117
RFT1	-1.06526	0.385868	-2.76067	0.00576823	0.101433
ADCK4	1.90613	0.69063	2.75998	0.00578048	0.101464
TLR8	-2.58521	0.936757	-2.75975	0.00578458	0.101464
C9orf30	-1.10954	0.402328	-2.75779	0.00581942	0.10183
MMRN2	-2.44681	0.887386	-2.75732	0.00582775	0.10183
MLLT10	-0.654083	0.237232	-2.75714	0.00583091	0.10183
ATG4A	0.846329	0.307008	2.7567	0.0058388	0.10183
LZTS1	-2.47777	0.898878	-2.75652	0.00584209	0.10183
ATP10A	-2.2611	0.820524	-2.75567	0.00585714	0.101964
SGCD	-1.53518	0.557446	-2.75395	0.00588804	0.102298
PDPN	-1.50659	0.547195	-2.75329	0.00589991	0.102298
PPM1H	0.820052	0.297868	2.75308	0.0059038	0.102298
PDE1C	-4.1249	1.49835	-2.75297	0.0059058	0.102298
DHX37	1.46138	0.531327	2.75044	0.00595159	0.102963
VEGFC	-2.35526	0.856574	-2.74962	0.00596638	0.103091
TMEM171	1.14544	0.417233	2.74533	0.00604502	0.10432
KCMF1	-0.49136	0.179188	-2.74215	0.00610375	0.105203
STX6	0.635755	0.231912	2.74136	0.00611855	0.105327
C19orf21	0.867456	0.316537	2.74046	0.00613538	0.105349
KLLN	2.66418	0.972191	2.74039	0.00613669	0.105349
IL10RB	0.710918	0.259452	2.74007	0.0061426	0.105349
KPNA4	-0.517456	0.188914	-2.73911	0.00616059	0.105425
BTG2	0.867882	0.316858	2.73902	0.00616218	0.105425
RNASE2	-2.91348	1.06626	-2.73244	0.00628675	0.107424
MVK	-1.89111	0.692795	-2.72969	0.00633947	0.108192
PNRC1	-0.531643	0.19482	-2.7289	0.00635456	0.108316
C12orf69	-3.77236	1.38269	-2.72827	0.00636673	0.108391
FAS	0.969472	0.355543	2.72674	0.00639636	0.108729
SHC3	-2.38419	0.874554	-2.72618	0.00640729	0.108729
KYNU	-1.10405	0.405037	-2.72579	0.00641469	0.108729
ERMP1	-0.702934	0.257898	-2.72563	0.0064179	0.108729
MAP2K6	1.39499	0.511941	2.7249	0.00643209	0.108836
SF3B4	-0.710011	0.260751	-2.72294	0.00647033	0.10935
ELOVL2	-3.35574	1.23567	-2.71573	0.00661302	0.111626
AGR2	0.756679	0.278983	2.71228	0.00668219	0.112657
PRDM1	-0.813065	0.299965	-2.71053	0.00671748	0.113019
IFI27	0.875192	0.322901	2.7104	0.00672015	0.113019
LIPH	0.781755	0.288488	2.70983	0.00673172	0.113019
CNOT7	-0.683767	0.252368	-2.7094	0.00674051	0.113019
PRH2	-1.60825	0.593624	-2.70921	0.00674438	0.113019
WWTR1	-0.67714	0.250028	-2.70826	0.00676376	0.113207
PRKACB	0.881126	0.325432	2.70756	0.00677804	0.11331
STARD9	-2.29633	0.848283	-2.70703	0.00678874	0.113352
LFNG	1.17474	0.434027	2.70661	0.00679746	0.113362
UBTD1	-2.4166	0.893334	-2.70515	0.00682739	0.113724
DNM3OS	-1.3683	0.506072	-2.70377	0.00685573	0.113861
FNDC4	1.90688	0.705321	2.70356	0.00686002	0.113861
MARCKSL1	0.674406	0.249451	2.70356	0.00686016	0.113861
ABI3	-2.82252	1.04442	-2.70248	0.00688243	0.114094
CEBPD	-0.910511	0.337149	-2.70062	0.00692105	0.114359
PKIA	-1.61998	0.599857	-2.7006	0.00692138	0.114359
NCAM2	-2.54356	0.941879	-2.70052	0.00692309	0.114359
SOD1	0.511978	0.189646	2.69965	0.00694122	0.114522
GNPAT	0.595843	0.220753	2.69914	0.00695192	0.114562
LOC100124692	1.51066	0.559828	2.69844	0.00696657	0.114577
TBC1D12	0.797431	0.29553	2.69831	0.00696931	0.114577
LOC100506248	-0.96665	0.358431	-2.69689	0.00699897	0.114929
SIX5	-1.51272	0.561399	-2.69456	0.00704816	0.115581
HSPB8	-2.15565	0.8001	-2.69422	0.00705533	0.115581
EFCAB2	-1.42692	0.530001	-2.6923	0.00709602	0.116111
C9orf114	-1.54862	0.575311	-2.6918	0.00710683	0.11614
C12orf75	0.759854	0.282323	2.69143	0.00711454	0.11614
MGC27345	0.955301	0.355036	2.69071	0.00712994	0.116255
EIF5A	-0.527863	0.196507	-2.68623	0.00722631	0.117577
LOC100288432	1.42211	0.529447	2.68604	0.00723047	0.117577
MAPKAP1	-0.512086	0.190667	-2.68576	0.00723645	0.117577
PPP2R5C	-0.477636	0.177971	-2.68379	0.00727934	0.11801
FBXO48	-1.84493	0.687501	-2.68353	0.00728484	0.11801
CTF1	-1.91224	0.712628	-2.68336	0.00728854	0.11801
GEM	-1.00275	0.37384	-2.68231	0.00731167	0.11817
ANAPC4	-0.733134	0.27334	-2.68213	0.00731546	0.11817
FLG	-3.52166	1.31395	-2.6802	0.00735772	0.11868
KIF5C	-2.55232	0.95239	-2.67991	0.00736411	0.11868
SASH3	-2.28084	0.851467	-2.67872	0.0073904	0.118966
ARAP2	-0.509668	0.190333	-2.67777	0.00741144	0.119166
ELOVL6	0.744008	0.277998	2.67631	0.00744377	0.119548
SUCNR1	2.19511	0.820371	2.67576	0.00745605	0.119607
MBOAT2	-0.784582	0.293299	-2.67502	0.00747245	0.119731
PTPRN2	1.0808	0.404137	2.67435	0.00748749	0.119834
AGPAT4	-1.39404	0.521359	-2.67385	0.00749859	0.119874
LHFP	-1.33703	0.500119	-2.67343	0.00750806	0.119887
OAT	0.70269	0.262996	2.67187	0.00754301	0.120208
CLINT1	0.467769	0.175079	2.67176	0.00754542	0.120208
CXCR7	-1.52935	0.572572	-2.67102	0.00756203	0.120334
RASA1	-0.63842	0.239069	-2.67044	0.00757523	0.120406
CASD1	-0.809814	0.303366	-2.66943	0.0075981	0.120632
ICOSLG	2.20251	0.825533	2.66799	0.00763073	0.120852
NFYB	-0.752487	0.282067	-2.66776	0.00763578	0.120852
RIOK3	0.639082	0.239566	2.66766	0.00763806	0.120852
ZKSCAN2	-1.08381	0.406379	-2.66699	0.00765346	0.120958
LOC100287896	1.17888	0.442498	2.66415	0.0077183	0.121796
BCHE	-3.38299	1.26994	-2.6639	0.00772401	0.121796
OLFML2B	-1.24224	0.46648	-2.66301	0.00774441	0.121967
MUC17	1.72291	0.647149	2.6623	0.00776086	0.121967
C1orf226	1.12757	0.423533	2.66229	0.0077612	0.121967
CD300E	-4.12351	1.54918	-2.66174	0.00777388	0.122028
GPATCH1	0.780767	0.293818	2.65731	0.00787671	0.123503
MAPK10	-1.88073	0.70815	-2.65583	0.00791141	0.123907
LGR5	1.795	0.676058	2.65509	0.00792861	0.123994
WDR66	-1.38779	0.522741	-2.65483	0.00793483	0.123994
JOSD1	-0.755978	0.284885	-2.65362	0.00796328	0.124071
KIAA2026	-0.463965	0.174846	-2.65356	0.00796468	0.124071
SCN7A	-1.68574	0.635292	-2.65348	0.00796657	0.124071
ADAMTS9	-1.1436	0.431105	-2.65272	0.00798455	0.124212
C5orf32	0.800707	0.30191	2.65213	0.00799846	0.124289
LPCAT4	0.929922	0.350736	2.65135	0.00801714	0.12438
UACA	-0.59722	0.225269	-2.65113	0.00802219	0.12438
C14orf135	-0.662451	0.24997	-2.65012	0.00804641	0.12447
LIMS1	-0.513914	0.19397	-2.64945	0.00806222	0.12447
FXYD6	-1.46414	0.55266	-2.64926	0.00806687	0.12447
TMEM43	-0.508348	0.191885	-2.64923	0.00806749	0.12447
ENPEP	-1.80729	0.682278	-2.6489	0.0080753	0.12447
DCTN6	-0.614862	0.232143	-2.64863	0.00808179	0.12447
TSR2	0.706638	0.266911	2.64746	0.00810989	0.124765
LOC649395	-0.57747	0.218234	-2.64611	0.00814236	0.125113
ZBED4	-0.802746	0.303407	-2.64577	0.00815054	0.125113
FZD1	-0.823156	0.31125	-2.64468	0.00817689	0.12523
RN7SL1	-0.595347	0.225162	-2.64409	0.0081912	0.12523
NOX4	-1.71991	0.650503	-2.64398	0.00819381	0.12523
IDS	-0.547663	0.207173	-2.64351	0.00820524	0.12523
MALAT1	-0.617776	0.233713	-2.64331	0.00821004	0.12523
PLA2R1	-0.928991	0.351462	-2.64322	0.00821224	0.12523
SH3PXD2B	-0.896509	0.339276	-2.64242	0.00823162	0.125388
PTHLH	-2.05066	0.776367	-2.64135	0.00825756	0.125645
LOC100499484	2.94056	1.11393	2.6398	0.00829553	0.12601
TFRC	0.576651	0.218459	2.63963	0.00829967	0.12601
SBF1	-0.99025	0.375234	-2.63902	0.00831452	0.126098
NUDCD3	0.83065	0.314937	2.63751	0.00835171	0.126523
LAMB1	-0.668681	0.253622	-2.63653	0.00837593	0.126635
ITGBL1	-1.11383	0.42247	-2.63647	0.00837733	0.126635
IDH1	0.562086	0.213326	2.63487	0.00841692	0.12696
ATP1B1	0.642204	0.243733	2.63487	0.00841706	0.12696
LOC728323	-1.49498	0.567518	-2.63424	0.00843268	0.127057
CHST3	-1.57913	0.599563	-2.6338	0.00844341	0.127081
REV3L	-0.566747	0.215223	-2.6333	0.00845598	0.127108
SLC25A24	0.428009	0.162556	2.633	0.00846348	0.127108
EHMT2	-1.03575	0.393584	-2.63159	0.0084986	0.127497
LOC100505491	-2.61886	0.996066	-2.6292	0.00855859	0.128259
SLC35D1	0.806114	0.306799	2.6275	0.00860153	0.128763
LOC100131826	-2.12504	0.809338	-2.62565	0.00864838	0.129212
CCNI	-0.40982	0.156131	-2.62485	0.00866879	0.129212
ANKRD1	-2.1089	0.80345	-2.6248	0.00866996	0.129212
PER1	-1.23261	0.469603	-2.62479	0.00867022	0.129212
RHOJ	-2.04288	0.778391	-2.62449	0.00867798	0.129212
ARL6IP5	-0.523856	0.199833	-2.62146	0.0087553	0.130119
ARHGEF17	-1.24056	0.473299	-2.6211	0.00876477	0.130119
FRAT1	1.83456	0.699951	2.62099	0.00876747	0.130119
SNX11	-1.39524	0.532404	-2.62064	0.00877639	0.130119
GBP3	0.810363	0.309377	2.61934	0.00881007	0.130479
EVC	-2.04966	0.782972	-2.61779	0.00885005	0.130932
RNF144A	-1.12174	0.428808	-2.61594	0.00889814	0.131503
PLA2G12A	-0.616714	0.235848	-2.61488	0.00892595	0.131683
EFHD2	0.705831	0.269959	2.61458	0.00893368	0.131683
LDHA	-0.521847	0.199606	-2.61439	0.00893876	0.131683
KATNAL2	-2.60525	0.99699	-2.61311	0.00897213	0.132035
PIGM	0.62658	0.239866	2.61221	0.00899588	0.132136
IGBP1	0.538581	0.206184	2.61213	0.00899801	0.132136
KATNA1	-0.996762	0.38166	-2.61165	0.00901061	0.132181
ACSM3	1.11857	0.428442	2.61078	0.00903351	0.132269
NRBP2	-0.888163	0.340201	-2.6107	0.00903564	0.132269
SLC9A1	0.83984	0.321755	2.61018	0.00904935	0.13233
RNF24	-0.934243	0.35833	-2.60721	0.00912828	0.133344
GHITM	0.571209	0.219134	2.60667	0.00914271	0.133414
PDGFRL	-2.65206	1.01774	-2.60582	0.0091654	0.133605
KLF3	0.344115	0.132193	2.60312	0.00923803	0.134345
PLXND1	-1.08586	0.41714	-2.60311	0.00923831	0.134345
PP7080	0.932288	0.358192	2.60276	0.00924771	0.134345
GIMAP8	-2.85561	1.09726	-2.60249	0.00925482	0.134345
GNAZ	1.8826	0.7236	2.60171	0.00927598	0.134511
ELN	-1.64158	0.631059	-2.6013	0.00928701	0.134531
LOC728377	1.14402	0.440046	2.59978	0.00932837	0.134887
WNT4	-2.66517	1.02519	-2.59968	0.00933098	0.134887
KAL1	-1.20313	0.463728	-2.59447	0.00947373	0.136808
LOC641367	-1.49	0.574612	-2.59305	0.00951299	0.13702
GINS4	-1.47966	0.570642	-2.59298	0.00951485	0.13702
NAGLU	-1.12253	0.432976	-2.5926	0.00952525	0.13702
EGR2	-1.27033	0.49	-2.59251	0.00952785	0.13702
PXMP2	1.42861	0.551508	2.59037	0.00958727	0.137732
SPOCK2	-2.22154	0.857764	-2.58992	0.00959971	0.137764
HNF4G	0.797926	0.308129	2.58958	0.00960934	0.137764
BRMS1	-1.18898	0.459265	-2.58889	0.00962867	0.137898
LSM2	-0.851161	0.328974	-2.58732	0.00967254	0.138384
MTHFR	1.11989	0.433015	2.58627	0.00970207	0.138664
WTH3DI	1.00256	0.388138	2.583	0.00979466	0.139779
MIB1	0.53237	0.206121	2.5828	0.00980022	0.139779
FAM190B	-0.517305	0.200329	-2.58227	0.00981523	0.139849
ANKIB1	-0.374967	0.145231	-2.58186	0.00982701	0.139874
TNFSF4	-1.77783	0.688735	-2.5813	0.00984285	0.139956
C8orf84	-1.83133	0.709946	-2.57953	0.00989341	0.140531
TTI1	-0.812544	0.315046	-2.57913	0.00990495	0.140551
DBN1	-0.934906	0.362553	-2.57867	0.00991801	0.140593
PCNP	-0.463656	0.179867	-2.57777	0.00994407	0.140693
DHX32	0.568734	0.220634	2.57773	0.00994531	0.140693
KAT2A	0.813956	0.315839	2.57712	0.00996262	0.14079
CMYA5	-1.74547	0.677581	-2.57602	0.00999434	0.14079
C9orf69	1.04251	0.404714	2.57592	0.0099975	0.14079
LMAN1	-0.531978	0.206533	-2.57575	0.0100023	0.14079
INTU	-0.870713	0.338081	-2.57546	0.0100108	0.14079
CLTCL1	-2.61229	1.01433	-2.57538	0.010013	0.14079
SGCE	-1.42051	0.552088	-2.57298	0.0100828	0.141629
GGPS1	0.577333	0.224516	2.57146	0.0101272	0.142108
NR2F6	0.605462	0.235514	2.57081	0.010146	0.142229
HSPA5	-0.369558	0.143816	-2.56966	0.01018	0.142433
SMARCB1	-0.834795	0.324871	-2.56962	0.0101811	0.142433
THSD7A	-1.46519	0.570284	-2.56923	0.0101925	0.142448
LRRC8E	-1.03975	0.404901	-2.56793	0.0102309	0.142842
SYNC	-3.61167	1.40696	-2.56701	0.0102581	0.142929
RLF	-0.518822	0.202124	-2.56685	0.0102627	0.142929
HDGF	-0.443656	0.172853	-2.56667	0.010268	0.142929
CCNB2	-0.936556	0.364972	-2.56611	0.0102848	0.143019
APEX2	0.825093	0.321618	2.56544	0.0103045	0.14315
PAFAH2	0.904408	0.352846	2.56318	0.0103717	0.14394
GNG2	-1.88161	0.734463	-2.56188	0.0104108	0.144338
CSRP2	-2.10367	0.821696	-2.56015	0.0104626	0.144912
MBD2	-0.61788	0.241486	-2.55865	0.0105078	0.145187
ACSS3	-2.02325	0.790774	-2.55856	0.0105105	0.145187
RHOT1	-0.695007	0.271651	-2.55845	0.0105138	0.145187
MAP3K8	1.1643	0.455424	2.55651	0.0105728	0.145745
WISP1	-1.21835	0.476583	-2.55643	0.0105752	0.145745
PRKCI	0.504107	0.197255	2.55561	0.0106002	0.145847
ATP7A	0.563021	0.220318	2.5555	0.0106036	0.145847
SNCAIP	-2.32166	0.908644	-2.55508	0.0106164	0.145878
BCAT2	-1.22621	0.480126	-2.55394	0.010651	0.145925
GABARAP	-0.423407	0.165824	-2.55335	0.0106691	0.145925
ARHGAP12	0.445355	0.174425	2.55327	0.0106717	0.145925
MYO10	0.424704	0.166338	2.55326	0.010672	0.145925
INPP1	0.702501	0.27514	2.55325	0.0106723	0.145925
HERC2P2	1.15665	0.453195	2.55222	0.0107038	0.146085
PREX1	-1.52761	0.598552	-2.55218	0.0107051	0.146085
STC1	-1.54109	0.603945	-2.55171	0.0107196	0.14614
LEO1	0.511034	0.200308	2.55125	0.0107338	0.146191
LYSMD1	1.508	0.591349	2.55011	0.010769	0.146526
MLF2	-0.557867	0.218814	-2.5495	0.0107878	0.146597
TRAK1	0.544781	0.213724	2.54899	0.0108034	0.146597
PPIL1	-0.865783	0.339667	-2.54891	0.0108059	0.146597
CPEB3	0.758605	0.297728	2.54798	0.0108347	0.146845
TMEM98	0.985296	0.386798	2.54732	0.0108555	0.146972
SERPINB6	0.494257	0.194054	2.547	0.0108652	0.146972
SNAI1	-2.24059	0.880314	-2.54522	0.010921	0.147436
TMEM14C	-0.726508	0.285457	-2.54507	0.0109257	0.147436
POLR3GL	0.641759	0.252176	2.54488	0.0109314	0.147436
LCP1	-1.3022	0.511766	-2.54452	0.0109427	0.147445
DVL3	-0.591168	0.232429	-2.54344	0.0109767	0.147759
ARL2BP	-0.721653	0.283815	-2.54269	0.0110002	0.147875
BMPR1B	-1.6057	0.631594	-2.54229	0.0110129	0.147875
AARSD1	-1.39289	0.547982	-2.54185	0.0110268	0.147875
NPC2	-0.605388	0.238198	-2.54153	0.0110369	0.147875
HOOK2	-1.44785	0.569687	-2.54148	0.0110385	0.147875
FMO4	1.15064	0.452912	2.54054	0.0110681	0.148129
C14orf129	0.64201	0.252751	2.54009	0.0110824	0.148136
LOC100499466	-0.518348	0.204108	-2.53957	0.0110987	0.148136
DBR1	0.655483	0.258113	2.53952	0.0111006	0.148136
SLC2A8	1.80365	0.711063	2.53656	0.0111949	0.149251
ANK2	-1.65855	0.654123	-2.53554	0.0112275	0.149306
PID1	-1.40069	0.552424	-2.53554	0.0112275	0.149306
ASPHD2	1.11425	0.439473	2.53542	0.0112312	0.149306
PLCB4	0.802035	0.316491	2.53415	0.0112721	0.149664
C9orf7	1.20164	0.474223	2.53391	0.0112798	0.149664
ARHGAP25	-1.73331	0.684601	-2.53186	0.011346	0.150367
FOXO3B	-0.776679	0.306833	-2.53127	0.0113649	0.150367
C1GALT1	0.536854	0.212089	2.53126	0.0113652	0.150367
ARL8B	-0.453175	0.179347	-2.5268	0.0115107	0.151971
LOC100499177	-0.658381	0.260586	-2.52654	0.0115192	0.151971
LOC100288273	-2.99765	1.18664	-2.52617	0.0115314	0.151971
NLGN2	-1.85173	0.733094	-2.5259	0.0115401	0.151971
MARCH5	0.755724	0.299193	2.52587	0.0115411	0.151971
CTH	-1.74205	0.690259	-2.52376	0.0116107	0.152742
ZNF540	-3.0341	1.20264	-2.52286	0.0116404	0.152988
WASF1	-1.46217	0.579775	-2.52197	0.0116701	0.153233
PANK4	-1.33305	0.528742	-2.52117	0.0116965	0.153425
PPIL4	-0.523423	0.207644	-2.52077	0.0117098	0.153425
MRPL17	-0.630986	0.250339	-2.52053	0.0117178	0.153425
MYH9	-0.521904	0.207115	-2.51988	0.0117396	0.153566
SCARB1	-1.01733	0.40379	-2.51946	0.0117534	0.153601
AZI2	-0.593027	0.235475	-2.51842	0.0117881	0.153639
HNF4A	0.797615	0.316728	2.5183	0.0117924	0.153639
HSD11B1	-2.45563	0.975165	-2.51817	0.0117965	0.153639
SERPINE2	-1.34811	0.535376	-2.51805	0.0118005	0.153639
ZDHHC23	0.918817	0.365241	2.51564	0.0118815	0.154314
ORC3	-0.656528	0.260987	-2.51556	0.0118845	0.154314
ARF6	-0.416766	0.165714	-2.51497	0.0119043	0.154314
PCDH9	-1.86974	0.743462	-2.51491	0.0119062	0.154314
ZNF135	-2.56187	1.01869	-2.51486	0.0119079	0.154314
NR3C1	-0.490807	0.195271	-2.51347	0.011955	0.154751
DCAF4	1.29701	0.516079	2.51321	0.0119639	0.154751
FOXRED2	-1.17699	0.468891	-2.51017	0.0120674	0.155945
MTMR10	0.724634	0.288734	2.50969	0.0120836	0.156009
TUBGCP3	0.664007	0.26471	2.50843	0.012127	0.156424
ADAMTS9-AS1	-2.24348	0.894512	-2.50805	0.0121401	0.156447
CASP10	0.685932	0.273592	2.50714	0.0121713	0.156705
S100PBP	-0.789965	0.315411	-2.50456	0.0122604	0.157624
NAP1L4	-0.574087	0.229302	-2.50363	0.0122926	0.157624
MCAT	-1.20669	0.482008	-2.50347	0.0122983	0.157624
AR	-1.93363	0.772394	-2.50343	0.0122996	0.157624
LOXL4	-1.343	0.5365	-2.50327	0.0123051	0.157624
TMEM50A	0.400467	0.159994	2.50301	0.012314	0.157624
RASD1	-2.06879	0.826597	-2.50278	0.0123222	0.157624
PAIP2	-0.565384	0.22599	-2.50181	0.0123561	0.157912
KLHL20	0.589702	0.23584	2.50043	0.0124043	0.158382
NAIP	-2.56679	1.02685	-2.49968	0.0124306	0.158573
RPS6KB1	-0.63708	0.254985	-2.49851	0.0124718	0.158953
ASXL3	-2.36368	0.946396	-2.49756	0.012505	0.159191
LOC595101	-1.1135	0.445901	-2.49718	0.0125184	0.159191
HDAC1	0.468161	0.187489	2.497	0.0125249	0.159191
LOC100132891	-1.47502	0.590984	-2.49587	0.012565	0.159501
HNRNPUL2	0.767532	0.307583	2.49536	0.0125828	0.159501
LAMC1	-0.47176	0.189069	-2.49517	0.0125896	0.159501
TFG	-0.456447	0.182951	-2.49491	0.0125989	0.159501
MUC16	-1.50053	0.60149	-2.49469	0.0126067	0.159501
AMPH	-3.01281	1.20817	-2.4937	0.0126421	0.159737
AZGP1	1.01712	0.407904	2.49352	0.0126483	0.159737
PHIP	-0.413135	0.165806	-2.49167	0.0127142	0.160423
POLR3D	-1.13163	0.454463	-2.49003	0.0127732	0.161021
ATP2C1	0.407284	0.163588	2.48969	0.0127854	0.161029
WDR78	-1.14512	0.460219	-2.48821	0.0128387	0.161536
PTAFR	0.927958	0.372984	2.48793	0.0128489	0.161536
DNAJC14	0.666778	0.268116	2.4869	0.0128861	0.161857
WWC2	-0.561437	0.22589	-2.48545	0.0129389	0.162346
BLVRB	0.795129	0.31996	2.48509	0.0129518	0.162346
DTNBP1	1.1379	0.458038	2.48429	0.0129811	0.162346
C1orf116	0.671509	0.270405	2.48334	0.0130155	0.162346
GLI1	-3.51969	1.41732	-2.48334	0.0130158	0.162346
ATXN7L3B	0.458232	0.18454	2.4831	0.0130243	0.162346
RAD1	-0.65733	0.264722	-2.4831	0.0130246	0.162346
LOC100130231	-3.01148	1.21285	-2.48297	0.013029	0.162346
LOC100506528	-1.33479	0.537611	-2.48282	0.0130347	0.162346
OSTM1	-0.776144	0.312662	-2.48237	0.0130511	0.162346
FBXO46	1.16333	0.468659	2.48224	0.0130558	0.162346
RAI14	-0.700396	0.282232	-2.48163	0.0130782	0.162346
TAF9B	-0.541771	0.218334	-2.48138	0.0130873	0.162346
CELF2	-1.23181	0.496538	-2.4808	0.0131089	0.162346
ELP2	-0.704334	0.283956	-2.48043	0.0131223	0.162346
C19orf66	0.874589	0.352639	2.48013	0.0131335	0.162346
NLRC3	-2.60078	1.04871	-2.47999	0.0131385	0.162346
ADAMTS16	-3.05347	1.23129	-2.47989	0.0131423	0.162346
C1orf63	-0.905333	0.365089	-2.47976	0.0131471	0.162346
TPST2	-1.05805	0.426837	-2.47881	0.0131823	0.162637
SRRT	-0.856535	0.345592	-2.47846	0.0131953	0.162652
LOC100127983	-3.04591	1.22928	-2.47779	0.0132198	0.16281
MX1	0.902851	0.364722	2.47545	0.0133068	0.163736
ZNF652	0.43363	0.175252	2.47432	0.0133491	0.164111
HDHD1	0.767589	0.31032	2.47354	0.0133782	0.164323
PLSCR1	0.544011	0.220131	2.47131	0.013462	0.165149
LOC149351	3.08068	1.2468	2.47087	0.0134783	0.165149
DYNLT3	0.517242	0.209342	2.4708	0.0134811	0.165149
FTH1	-0.445648	0.180453	-2.46961	0.0135261	0.165554
GNG12	0.477786	0.193494	2.46926	0.0135394	0.165572
UBE2V2	-0.552361	0.223875	-2.46728	0.0136145	0.166344
DTX3L	0.422202	0.171163	2.46667	0.0136375	0.166479
LOC386597	-3.62567	1.47018	-2.46614	0.0136579	0.16658
RLIM	-0.296823	0.120375	-2.46581	0.0136702	0.166585
LARS2	-0.931195	0.377857	-2.46441	0.0137239	0.167093
LGMN	0.626721	0.254352	2.46399	0.01374	0.167142
C7orf36	0.727499	0.295473	2.46215	0.0138105	0.167853
A4GALT	-1.44343	0.586343	-2.46175	0.0138259	0.167893
DHRS3	0.714077	0.29014	2.46115	0.0138494	0.167957
GNAS	-0.364431	0.148083	-2.46099	0.0138554	0.167957
MAPKAPK2	0.475416	0.19322	2.46048	0.0138749	0.167978
LOC100506325	1.68367	0.68433	2.46032	0.0138812	0.167978
WWOX	1.22887	0.499634	2.45953	0.0139118	0.1682
SNRPD1	0.663909	0.270008	2.45885	0.0139384	0.168376
C6orf174	-2.53801	1.03234	-2.45851	0.0139516	0.168389
RPL7	-0.688033	0.280033	-2.45697	0.0140113	0.168962
ALDH18A1	0.585617	0.238488	2.45554	0.0140672	0.16949
RPIA	0.868689	0.353889	2.45469	0.0141005	0.169728
TSPAN14	-0.493986	0.201264	-2.45442	0.0141114	0.169728
MAST3	0.950887	0.387545	2.45362	0.0141427	0.169844
ALCAM	-0.695272	0.283374	-2.45355	0.0141455	0.169844
NT5E	-0.780511	0.318481	-2.45073	0.0142567	0.171031
HCCS	0.59903	0.244586	2.44916	0.014319	0.171631
LOC729513	-1.26962	0.518514	-2.44857	0.0143423	0.171664
MCM5	-1.04646	0.427414	-2.44836	0.0143507	0.171664
PPP3CB	-0.648035	0.264735	-2.44786	0.0143708	0.171664
SNAP23	0.53932	0.220345	2.44761	0.0143807	0.171664
FNIP1	0.434691	0.177604	2.44754	0.0143836	0.171664
B2M	0.634809	0.259573	2.44559	0.0144615	0.172446
STAT4	-2.0826	0.851931	-2.44457	0.0145025	0.172594
MARCH1	-0.755967	0.309256	-2.44447	0.0145065	0.172594
LIF	-0.924604	0.378261	-2.44435	0.0145112	0.172594
PODXL	-0.763391	0.312455	-2.4432	0.0145577	0.172999
ACBD5	0.494746	0.202632	2.44159	0.0146226	0.17349
ZBTB10	-0.786234	0.322021	-2.44156	0.014624	0.17349
TIMM8A	1.57961	0.647051	2.44124	0.0146368	0.173493
NOS3	-2.29115	0.938684	-2.44081	0.0146545	0.173555
TNFRSF10D	-1.10209	0.451705	-2.43985	0.0146936	0.17387
RAB12	-0.610155	0.250113	-2.43952	0.0147067	0.173877
HTR2B	1.01719	0.417381	2.43708	0.0148064	0.174907
HOXD8	-2.82679	1.16095	-2.43489	0.0148962	0.175741
GALT	1.4288	0.586838	2.43474	0.0149023	0.175741
RBMS3	-1.09736	0.450806	-2.43421	0.0149242	0.175827
SLC16A7	-0.821264	0.337419	-2.43395	0.0149349	0.175827
TECPR2	-0.892897	0.36719	-2.4317	0.015028	0.176773
PPA1	0.4743	0.195114	2.43088	0.0150621	0.17691
PPP1R15B	0.388833	0.159973	2.43061	0.0150733	0.17691
CEBPB	-0.780855	0.321286	-2.4304	0.015082	0.17691
PANK1	1.08492	0.446433	2.4302	0.0150906	0.17691
DPYSL3	-1.01101	0.41634	-2.42832	0.0151688	0.177677
BNIP3L	-0.543292	0.223762	-2.42798	0.015183	0.177694
LRRC32	-1.11095	0.457748	-2.427	0.0152243	0.178027
MERTK	-1.48918	0.613695	-2.42657	0.0152422	0.178087
DLC1	-1.0677	0.440223	-2.42536	0.0152934	0.178416
LDB2	-1.9562	0.806583	-2.42529	0.0152961	0.178416
THSD4	-0.861786	0.355533	-2.42393	0.0153537	0.178937
SH3RF2	0.704555	0.290742	2.4233	0.01538	0.178949
MID2	-0.993187	0.40985	-2.42329	0.0153805	0.178949
CYP7B1	-1.20563	0.497603	-2.42287	0.0153984	0.179009
CAMK2G	0.700337	0.289105	2.42243	0.0154169	0.179073
SPG7	1.04908	0.433361	2.42081	0.015486	0.179636
MAPK8IP1	-2.2445	0.927218	-2.42069	0.0154913	0.179636
C5orf4	-1.11721	0.461871	-2.41888	0.0155682	0.180378
HMCN1	-0.940919	0.389138	-2.41796	0.0156079	0.180671
C6orf168	-1.98333	0.820342	-2.41769	0.0156195	0.180671
FAM129B	-0.633756	0.262319	-2.41597	0.0156932	0.181122
PDCD4	0.544678	0.225476	2.41568	0.015706	0.181122
MGST1	-0.798687	0.330692	-2.4152	0.0157267	0.181122
TRPT1	-1.14817	0.475405	-2.41514	0.0157294	0.181122
GPR135	-2.20875	0.914544	-2.41513	0.0157295	0.181122
CXCL1	-1.07804	0.446401	-2.41496	0.0157367	0.181122
APIP	0.709087	0.293712	2.41423	0.0157686	0.181296
CCDC69	-1.77443	0.735122	-2.4138	0.0157873	0.181296
IL20RB	-1.85654	0.769163	-2.41371	0.015791	0.181296
FAM164A	-0.675134	0.279861	-2.4124	0.015848	0.181801
CLASP1	-0.472845	0.196183	-2.41022	0.0159427	0.182736
SLC10A3	-0.990776	0.411272	-2.40905	0.0159941	0.183174
TAF13	-0.765416	0.317836	-2.40821	0.0160309	0.183357
PLCXD3	-2.13635	0.887157	-2.40808	0.0160365	0.183357
PDGFD	-1.35787	0.564025	-2.40746	0.0160639	0.183446
FECH	-0.960669	0.399064	-2.40731	0.0160707	0.183446
MAGI2-AS3	-1.19691	0.497455	-2.40608	0.0161249	0.183802
RHBDL2	0.91169	0.378924	2.406	0.0161283	0.183802
DNAJC18	-1.22696	0.510181	-2.40495	0.0161745	0.183841
ASNSD1	0.558258	0.232131	2.40493	0.0161757	0.183841
TMEM140	-1.03835	0.431801	-2.4047	0.0161856	0.183841
RNASEH2A	1.23826	0.51498	2.40448	0.0161955	0.183841
SUMF1	-0.81241	0.337937	-2.40403	0.0162154	0.183841
ENPP2	-1.60599	0.668073	-2.40391	0.0162209	0.183841
IL6	-4.36914	1.81758	-2.40383	0.0162244	0.183841
CASC3	-0.411997	0.171511	-2.40217	0.0162983	0.184528
ZDHHC13	0.535343	0.222892	2.40181	0.0163143	0.184559
ZBED2	-2.24053	0.93326	-2.40076	0.0163611	0.184938
SSPN	-0.807968	0.336757	-2.39926	0.0164282	0.185377
FAM129A	-0.959232	0.399855	-2.39895	0.0164423	0.185377
CFB	-0.798088	0.332688	-2.39891	0.0164439	0.185377
ZG16B	1.06633	0.444543	2.3987	0.0164533	0.185377
ORMDL3	-0.775439	0.32352	-2.39688	0.0165353	0.185973
SPECC1L	-0.544586	0.227247	-2.39645	0.016555	0.185973
ANKRD36BP2	-1.6386	0.683816	-2.39626	0.0165636	0.185973
SBF2	-0.564059	0.235412	-2.39605	0.0165728	0.185973
LIMA1	0.560714	0.234017	2.39604	0.0165731	0.185973
LOC100506562	-1.17252	0.489463	-2.39553	0.0165963	0.186083
ATP6V0B	0.7052	0.294435	2.39509	0.0166161	0.186154
ZNF30	1.34506	0.56182	2.39412	0.0166603	0.186499
GPRC5B	1.01122	0.422444	2.39373	0.016678	0.186547
ZCRB1	-0.603293	0.25221	-2.39203	0.0167554	0.187261
RPPH1	-0.775111	0.324197	-2.39087	0.0168087	0.187706
USP36	-0.752797	0.31491	-2.39051	0.0168249	0.187736
AOX1	-2.15416	0.901275	-2.39013	0.0168425	0.187782
LOC100506634	-1.40087	0.586292	-2.38936	0.0168776	0.188013
PTGER2	1.4031	0.587325	2.38897	0.0168958	0.188013
NCF2	-1.09746	0.459419	-2.38879	0.0169038	0.188013
NCOA5	0.663177	0.277685	2.38824	0.0169295	0.188147
CA2	1.31141	0.549336	2.38727	0.0169741	0.188356
KLF9	-0.689146	0.28873	-2.38682	0.016995	0.188356
RPL9	0.729449	0.305617	2.38681	0.0169955	0.188356
HSPA1B	-0.865903	0.362811	-2.38665	0.0170025	0.188356
CNTN1	-1.43725	0.602344	-2.38609	0.0170287	0.188496
HIST2H2BE	-0.636468	0.266961	-2.38413	0.0171198	0.189251
MYO5A	-0.933033	0.391368	-2.38403	0.0171242	0.189251
NRG1	-2.67162	1.12096	-2.38334	0.0171563	0.189335
MFSD4	1.00683	0.422457	2.38328	0.017159	0.189335
LRP12	-1.20755	0.506827	-2.38256	0.0171926	0.189555
H3F3AP4	0.329176	0.138182	2.38219	0.0172099	0.189574
DCTPP1	0.725857	0.304733	2.38194	0.0172216	0.189574
SFXN2	1.45707	0.611958	2.38099	0.0172662	0.189908
FSTL3	-1.15796	0.486395	-2.38071	0.0172793	0.189908
CSGALNACT1	-1.03234	0.43396	-2.37888	0.0173653	0.190703
TOE1	1.5493	0.651654	2.37749	0.0174309	0.191272
RNF5P1	1.17621	0.494915	2.37659	0.0174734	0.191517
NIT1	1.04762	0.440839	2.37641	0.0174818	0.191517
PDCD1LG2	-2.32742	0.979674	-2.37571	0.0175154	0.191517
YEATS4	-0.804448	0.338627	-2.37562	0.0175196	0.191517
ZNF586	-1.07399	0.452176	-2.37515	0.0175418	0.191517
KIAA1644	-3.16286	1.33175	-2.37496	0.0175507	0.191517
DUSP19	1.28164	0.539725	2.37462	0.0175668	0.191517
GPX2	0.83351	0.351044	2.37438	0.0175786	0.191517
KIF13A	0.617722	0.260238	2.37368	0.0176119	0.191517
SCAMP3	-0.732622	0.308657	-2.37358	0.0176165	0.191517
IRF9	0.596529	0.251332	2.37347	0.0176219	0.191517
BST1	-1.60428	0.675989	-2.37323	0.0176334	0.191517
VMP1	-0.52408	0.220833	-2.37319	0.017635	0.191517
ZNF781	-3.11672	1.31349	-2.37285	0.0176515	0.191517
PGAM1	0.660383	0.278329	2.37267	0.0176601	0.191517
CYB5R2	1.33926	0.564761	2.37138	0.017722	0.192039
AHNAK	-0.413936	0.174619	-2.37051	0.0177634	0.192192
PCDHGB5	1.29607	0.546747	2.37051	0.0177638	0.192192
RMND5A	0.381734	0.161101	2.36953	0.0178109	0.192551
KRT7	-0.702218	0.29652	-2.3682	0.0178749	0.192824
SAMD5	1.12533	0.475186	2.36818	0.0178757	0.192824
ETNK1	0.467669	0.197506	2.36787	0.0178909	0.192824
ZDHHC6	-0.555673	0.234674	-2.36785	0.0178916	0.192824
NCAPG2	-0.861039	0.363904	-2.36611	0.0179759	0.193582
RN7SL2	-0.58242	0.246218	-2.36546	0.0180077	0.193775
RRM1	-0.499234	0.211093	-2.36499	0.0180305	0.193869
SLC4A2	0.680853	0.287942	2.36455	0.0180522	0.193873
PRELP	0.932487	0.394384	2.36441	0.0180587	0.193873
ESF1	-0.547245	0.23166	-2.36228	0.0181631	0.194843
UNKL	-1.44792	0.613202	-2.36125	0.0182135	0.195113
MBD1	-0.930717	0.394185	-2.36112	0.0182199	0.195113
SKP2	0.622817	0.263804	2.36091	0.0182304	0.195113
MEX3C	-0.852648	0.361275	-2.36011	0.0182697	0.195369
C12orf55	-2.10197	0.890773	-2.35972	0.0182889	0.195369
KALRN	0.868289	0.367987	2.35956	0.0182965	0.195369
KLHDC5	-0.62332	0.264284	-2.35852	0.018348	0.195682
SLC9B2	0.840984	0.356591	2.3584	0.018354	0.195682
TMUB2	-0.806545	0.342236	-2.3567	0.0184384	0.196351
SLC25A30	-0.774077	0.328477	-2.35656	0.018445	0.196351
IFIH1	0.51038	0.216621	2.3561	0.0184681	0.196446
CD109	-0.901709	0.38279	-2.35562	0.0184918	0.196548
PEG3	-1.76621	0.749914	-2.35521	0.0185122	0.196614
SYNCRIP	-0.332595	0.141273	-2.35427	0.0185589	0.19696
YEATS2	-0.508726	0.216124	-2.35386	0.0185797	0.19703
ZNF248	-0.829027	0.35227	-2.35338	0.0186035	0.197132
LOC100128252	-1.80119	0.765497	-2.35297	0.0186239	0.197198
YWHAE	-0.356674	0.151639	-2.35213	0.0186663	0.197397
ADAMTS7	-2.30119	0.978385	-2.35203	0.0186712	0.197397
IKZF2	-0.580074	0.246694	-2.35139	0.0187033	0.197447
ZNF283	1.03805	0.441474	2.35132	0.0187071	0.197447
C6	-2.21707	0.9432	-2.35059	0.0187438	0.197447
PCDHB5	-2.10438	0.895367	-2.35029	0.0187586	0.197447
HLA-L	-2.10065	0.89379	-2.35027	0.0187598	0.197447
ABHD14B	0.614715	0.261554	2.35024	0.0187612	0.197447
ABI2	-0.484361	0.206158	-2.34947	0.0188002	0.197708
RNF128	0.689376	0.293505	2.34877	0.0188356	0.197931
ADAM32	-1.68582	0.717876	-2.34835	0.0188569	0.198005
HAS2	-1.30441	0.556049	-2.34585	0.0189837	0.199186
PRRX1	-0.95353	0.406615	-2.34504	0.019025	0.199373
WDR47	-0.679306	0.28969	-2.34494	0.0190302	0.199373
HUWE1	-0.345542	0.147386	-2.34446	0.0190546	0.199434
CCL18	-2.30475	0.983209	-2.34411	0.0190723	0.199434
KIAA0355	-0.635192	0.271091	-2.3431	0.0191243	0.199434
RBM25	-0.519007	0.221509	-2.34306	0.0191264	0.199434
SEPT11	-0.431293	0.184089	-2.34285	0.0191369	0.199434
PDIA5	0.848545	0.362203	2.34273	0.0191431	0.199434
MELK	-0.799813	0.341409	-2.34268	0.0191458	0.199434
ETHE1	0.686024	0.29285	2.34258	0.0191509	0.199434
SMAP1	-0.5858	0.250105	-2.34222	0.0191696	0.199479
SMC4	-0.503936	0.21519	-2.34181	0.0191903	0.199517
COL18A1	-1.02021	0.435691	-2.34159	0.019202	0.199517
LOC100506831	-1.32465	0.566041	-2.3402	0.0192733	0.200108
RNGTT	-0.669299	0.286062	-2.3397	0.0192994	0.200229
XYLB	0.786683	0.336296	2.33926	0.0193221	0.200315
PTPLAD1	0.403834	0.172702	2.33833	0.01937	0.200516
FAM127C	-1.30345	0.557427	-2.33833	0.0193703	0.200516
ANKHD1	-0.985631	0.421765	-2.33692	0.0194432	0.200971
TAGLN	-0.907663	0.388442	-2.33668	0.019456	0.200971
CTSL1	-0.719115	0.307756	-2.33664	0.0194577	0.200971
GPATCH2	-0.501062	0.214472	-2.33625	0.0194781	0.201033
GPX4	-0.756909	0.324078	-2.33558	0.0195132	0.201246
LGALSL	0.77034	0.329904	2.33505	0.019541	0.201301
NAP1L1	-0.479544	0.205381	-2.3349	0.0195486	0.201301
TPI1	-0.484583	0.207617	-2.33402	0.0195947	0.201301
TSPYL4	-0.709342	0.303933	-2.33388	0.0196021	0.201301
DEPDC5	-1.06381	0.455821	-2.33384	0.0196043	0.201301
SRPX2	-1.3129	0.562555	-2.33381	0.0196055	0.201301
LIN37	1.55883	0.668098	2.33324	0.0196355	0.201459
GABPB1	-0.505682	0.216762	-2.33289	0.0196541	0.201501
LPCAT1	0.760544	0.326093	2.33229	0.0196854	0.201621
MED8	-0.821912	0.35249	-2.33173	0.019715	0.201621
FANCF	0.776076	0.332884	2.33137	0.0197336	0.201621
CHN1	-1.63482	0.701227	-2.33137	0.0197339	0.201621
CSNK2A2	0.489232	0.209868	2.33115	0.0197456	0.201621
TSPAN2	-1.27587	0.547345	-2.33101	0.0197528	0.201621
HIST1H2AG	-0.889081	0.38173	-2.32908	0.0198547	0.202279
IL18	-0.792153	0.340135	-2.32893	0.0198625	0.202279
LOC100507291	-1.76421	0.757522	-2.32892	0.0198633	0.202279
TMEM50B	0.568837	0.244366	2.32781	0.0199223	0.202279
ZNF250	-1.04097	0.447224	-2.32763	0.019932	0.202279
TMEM18	-0.771117	0.331309	-2.32749	0.0199394	0.202279
MMS22L	-0.788359	0.338751	-2.32725	0.0199518	0.202279
DST	-0.463084	0.198984	-2.32724	0.0199525	0.202279
TMOD3	-0.441577	0.189763	-2.32699	0.0199656	0.202279
SLC25A37	-0.759766	0.32653	-2.32679	0.0199764	0.202279
ADAMTS5	-1.68211	0.722987	-2.32662	0.0199857	0.202279
PPP2CB	-0.5881	0.252784	-2.3265	0.019992	0.202279
RGS2	-1.03248	0.44389	-2.32598	0.0200198	0.202413
LSAMP	-0.892216	0.383668	-2.32549	0.0200458	0.202483
ZFYVE28	1.43614	0.617615	2.3253	0.0200559	0.202483
CNTN4	-1.78919	0.769624	-2.32476	0.0200845	0.202615
FARSA	0.831448	0.357754	2.32408	0.0201214	0.202615
SLC35E2	-0.817661	0.351831	-2.32402	0.0201245	0.202615
RASSF8	-0.952436	0.409861	-2.3238	0.0201362	0.202615
MGC45800	-2.50431	1.07773	-2.32369	0.0201419	0.202615
ENTPD6	0.667906	0.287525	2.32295	0.0201817	0.202869
AHI1	-0.616889	0.265697	-2.32178	0.0202451	0.203358
CSTF1	0.560785	0.241569	2.32143	0.0202639	0.2034
E2F7	-1.16212	0.500763	-2.3207	0.0203033	0.20356
TLR4	-1.12505	0.484901	-2.32017	0.0203316	0.20356
GDPD1	1.63836	0.706157	2.3201	0.0203355	0.20356
ST13	-0.430649	0.185621	-2.32005	0.0203384	0.20356
COX4I1	0.452509	0.195141	2.31888	0.0204013	0.203917
TRAF1	-1.97304	0.850927	-2.31869	0.0204119	0.203917
C14orf132	-1.70861	0.736921	-2.31857	0.0204182	0.203917
MDM2	-0.541403	0.233588	-2.31777	0.0204618	0.204207
VDAC1	0.450496	0.194485	2.31635	0.0205392	0.204609
RUNX1T1	-1.24375	0.536971	-2.31624	0.0205451	0.204609
SNX29	-0.794329	0.342942	-2.31622	0.0205463	0.204609
SHROOM3	0.523201	0.226066	2.31437	0.0206475	0.205469
CRKL	-0.439459	0.189961	-2.31341	0.0207	0.205844
MRPL40	-0.829431	0.358621	-2.31284	0.0207317	0.206012
ENTPD1	-0.758298	0.327987	-2.31197	0.0207791	0.206249
LCA5L	1.366	0.590867	2.31186	0.0207853	0.206249
MFGE8	-0.949782	0.411149	-2.31007	0.0208844	0.207085
CPPED1	-1.04051	0.450515	-2.30959	0.0209106	0.207197
FGF1	-1.85309	0.802484	-2.30919	0.020933	0.207271
RAB11FIP2	0.570278	0.247069	2.30818	0.0209894	0.207681
IGF1R	-0.571622	0.247698	-2.30774	0.0210135	0.207684
RHPN2	0.590972	0.256102	2.30756	0.0210235	0.207684
C18orf21	-0.884318	0.383283	-2.30722	0.0210426	0.207684
GCLC	-0.716883	0.31073	-2.3071	0.0210494	0.207684
LOC100506935	-1.30447	0.565678	-2.30602	0.0211093	0.208127
ELTD1	-1.46456	0.635269	-2.30541	0.0211435	0.208316
BCO2	-2.18045	0.945924	-2.3051	0.021161	0.20834
ALDOB	1.36146	0.590964	2.3038	0.0212341	0.208913
PAF1	-0.652161	0.283157	-2.30318	0.0212687	0.20894
CLTC	-0.395751	0.171831	-2.30314	0.0212711	0.20894
ODZ3	-1.37537	0.597222	-2.30294	0.021282	0.20894
RNF141	-0.458218	0.199051	-2.30202	0.0213341	0.209268
PLK4	-0.983006	0.427071	-2.30174	0.0213499	0.209268
INMT	-1.82278	0.79198	-2.30155	0.0213607	0.209268
NDNF	-1.1375	0.494329	-2.3011	0.021386	0.209301
MNDA	-1.45237	0.631262	-2.30073	0.0214068	0.209301
FAM73A	0.450967	0.196014	2.30069	0.0214092	0.209301
G0S2	-1.27083	0.552486	-2.30021	0.0214362	0.20938
FASTK	-0.822402	0.357564	-2.30001	0.0214474	0.20938
FYB	-1.02215	0.444829	-2.29785	0.0215704	0.210305
CCDC102B	-1.83917	0.800541	-2.29741	0.0215955	0.210305
KIRREL	-1.13822	0.495462	-2.29729	0.0216021	0.210305
TRIM65	-1.22858	0.534795	-2.29728	0.0216027	0.210305
PES1	-0.814816	0.35492	-2.29577	0.021689	0.210997
TMEM169	-1.63941	0.714906	-2.29319	0.0218371	0.212289
LOC100506029	-2.1583	0.94148	-2.29245	0.0218797	0.212516
PRKCQ	-1.88386	0.821835	-2.29225	0.021891	0.212516
CDK17	-0.491636	0.214539	-2.2916	0.0219289	0.212661
RAB34	-1.36246	0.594578	-2.29146	0.0219366	0.212661
C14orf149	-1.3593	0.593327	-2.29098	0.0219648	0.212691
ANTXR1	-0.700493	0.305774	-2.29088	0.0219703	0.212691
DPYD	-0.872865	0.381146	-2.29011	0.022015	0.212956
HTRA3	-0.953064	0.416216	-2.28983	0.0220313	0.212956
RRP12	0.790486	0.345248	2.28961	0.0220437	0.212956
SLC16A1	0.788387	0.344413	2.28908	0.0220749	0.213013
PPP1R8	-0.919393	0.4017	-2.28876	0.0220936	0.213013
HOMER3	-1.69718	0.74154	-2.28872	0.0220956	0.213013
LOC100288778	-1.84142	0.804703	-2.28832	0.0221188	0.213089
L2HGDH	0.755318	0.330312	2.28668	0.0222146	0.213763
ZNF699	-1.24392	0.544004	-2.28659	0.0222195	0.213763
ANKRA2	-0.641268	0.280487	-2.28627	0.0222388	0.2138
STOM	-0.827624	0.362102	-2.28561	0.0222769	0.213819
FAM63B	-0.536801	0.234881	-2.28542	0.0222882	0.213819
UHRF1BP1	-0.629007	0.275245	-2.28526	0.0222975	0.213819
CMTM3	-1.17229	0.512998	-2.28518	0.0223023	0.213819
SLC1A4	0.970314	0.424661	2.28492	0.0223178	0.21382
HMBOX1	-0.821062	0.35943	-2.28435	0.0223512	0.213992
SAP30L	-0.778085	0.340717	-2.28367	0.022391	0.214226
ARHGEF1	0.871419	0.381674	2.28315	0.0224213	0.214368
COL24A1	-1.70656	0.747755	-2.28224	0.0224752	0.214596
E2F3	-0.61916	0.271344	-2.28183	0.0224994	0.214596
CDK5R1	-1.35342	0.593133	-2.28182	0.0224997	0.214596
SYT11	-1.07486	0.47108	-2.2817	0.022507	0.214596
AMN1	-0.835251	0.366112	-2.28141	0.0225241	0.214612
AKAP9	-0.363021	0.159165	-2.28079	0.0225608	0.214815
F3	-0.682396	0.299385	-2.27933	0.0226476	0.215494
GDI1	-0.503755	0.221116	-2.27824	0.0227124	0.215721
NAA50	-0.365443	0.160412	-2.27815	0.0227177	0.215721
HSP90AA4P	-1.61825	0.710393	-2.27796	0.022729	0.215721
KCTD7	-1.20746	0.530082	-2.27788	0.0227336	0.215721
VASN	-1.3284	0.583306	-2.27737	0.0227643	0.215865
PMS2CL	-0.923327	0.405619	-2.27634	0.0228258	0.2163
CAMK4	-1.87177	0.822441	-2.27587	0.0228535	0.216365
TRIM2	0.470371	0.206698	2.27564	0.0228675	0.216365
E2F4	0.802243	0.352566	2.27544	0.0228794	0.216365
C11orf73	-0.864937	0.380181	-2.27506	0.022902	0.216384
ARHGEF26	-1.36142	0.598456	-2.27489	0.0229125	0.216384
TOP1P1	-0.692823	0.304609	-2.27446	0.0229381	0.216478
SCP2	0.394029	0.173296	2.27373	0.022982	0.216606
COX15	0.540945	0.237912	2.27372	0.0229828	0.216606
ZNF217	-0.370662	0.163047	-2.27335	0.0230053	0.21666
GNL3L	0.585743	0.2577	2.27297	0.0230283	0.21666
CEP57L1	-0.993302	0.43703	-2.27285	0.0230354	0.21666
LOC729970	-3.01017	1.32473	-2.27229	0.0230689	0.216829
TMEM167A	0.602639	0.265369	2.27095	0.0231503	0.217379
F8	-0.961209	0.42329	-2.27081	0.0231588	0.217379
CYYR1	-1.9397	0.854672	-2.26952	0.0232364	0.217886
SORBS3	-1.16832	0.514895	-2.26904	0.0232659	0.217886
TRMT2B	-0.834853	0.367956	-2.26889	0.0232749	0.217886
LMBR1L	-1.30749	0.576286	-2.26882	0.023279	0.217886
PSMD1	0.331364	0.146064	2.26862	0.0232911	0.217886
ELK1	-0.832403	0.367012	-2.26805	0.023326	0.218065
BIVM	0.809199	0.356873	2.26747	0.0233617	0.218161
CEP63	-0.49685	0.21913	-2.26737	0.0233677	0.218161
TXNDC16	0.815048	0.359556	2.26682	0.0234011	0.218188
S1PR3	-1.40219	0.618574	-2.26681	0.023402	0.218188
CETN2	-0.533229	0.235278	-2.26638	0.0234283	0.21827
MAN1A1	-0.701429	0.309525	-2.26615	0.0234422	0.21827
PRR13	0.479268	0.21152	2.26582	0.0234622	0.218283
C11orf95	-1.24011	0.54736	-2.26561	0.023475	0.218283
CALCRL	-1.23702	0.546159	-2.26494	0.0235161	0.218519
JTB	0.511916	0.226258	2.26253	0.0236644	0.219409
PARVB	-2.07923	0.919106	-2.26223	0.023683	0.219409
PPP1R1B	0.999533	0.441837	2.26222	0.0236836	0.219409
AMZ2	-0.549425	0.242943	-2.26154	0.0237258	0.219409
ZNF512B	-1.26337	0.558716	-2.2612	0.0237468	0.219409
DPY30	-0.533956	0.236149	-2.2611	0.0237532	0.219409
CAMKK2	0.57079	0.252461	2.2609	0.0237653	0.219409
PSEN2	0.913108	0.403874	2.26088	0.0237669	0.219409
CRLS1	0.516558	0.228486	2.26078	0.0237727	0.219409
RGS4	-1.53988	0.681262	-2.26033	0.0238008	0.219409
IFIT5	0.624129	0.276145	2.26014	0.0238123	0.219409
FUT2	0.928053	0.410623	2.26011	0.0238146	0.219409
RELN	-2.7609	1.22182	-2.25965	0.0238427	0.219409
NUMBL	-1.28771	0.569931	-2.25941	0.0238578	0.219409
GET4	0.768286	0.34004	2.2594	0.0238585	0.219409
CX3CR1	-1.75945	0.778883	-2.25894	0.0238868	0.219409
AFAP1	-0.528575	0.233999	-2.25887	0.0238912	0.219409
C20orf103	-1.31056	0.580204	-2.25879	0.0238962	0.219409
DUS4L	-0.871841	0.386093	-2.25811	0.0239389	0.219617
ATP6V0A2	0.562104	0.248947	2.25792	0.0239504	0.219617
EPS15L1	-0.816861	0.361906	-2.25711	0.0240014	0.219924
LIPG	0.895424	0.396753	2.25688	0.0240156	0.219924
EREG	-1.31191	0.581386	-2.25652	0.024038	0.219929
MRPL43	-0.672044	0.297877	-2.25611	0.0240637	0.219929
SNX17	-0.607751	0.269401	-2.25593	0.024075	0.219929
PHACTR4	0.586082	0.259824	2.25569	0.02409	0.219929
RBM26-AS1	-1.92585	0.853807	-2.25561	0.0240953	0.219929
NOL12	-1.27269	0.564571	-2.25426	0.02418	0.220433
ZKSCAN1	0.394661	0.175076	2.25422	0.0241823	0.220433
HAAO	-2.19919	0.975803	-2.25373	0.0242133	0.220571
PTGFRN	-0.448047	0.199003	-2.25146	0.0243566	0.221731
KDELR2	0.402556	0.178889	2.25031	0.0244294	0.222249
C1orf131	0.584377	0.259723	2.25	0.0244491	0.222282
ORAOV1	1.27281	0.565777	2.24966	0.0244706	0.222332
LCP2	-1.26038	0.560501	-2.24868	0.0245332	0.222654
CCRN4L	-1.15466	0.513551	-2.24838	0.0245519	0.222654
TRMT112	-0.541671	0.240941	-2.24815	0.0245669	0.222654
HGSNAT	-0.587982	0.261547	-2.24809	0.0245702	0.222654
WDR53	-1.00509	0.447229	-2.24738	0.0246156	0.222921
CP	-1.27598	0.568379	-2.24495	0.0247716	0.224187
SENP6	-0.403251	0.179701	-2.24401	0.0248315	0.224455
KCNMA1	-1.45538	0.648571	-2.24398	0.0248336	0.224455
LIG1	-1.04291	0.464905	-2.24327	0.0248793	0.224723
TGFA	0.594377	0.265044	2.24256	0.0249253	0.224741
ZNF16	0.792298	0.353303	2.24255	0.0249261	0.224741
BCL2L13	-0.49921	0.222634	-2.24229	0.0249425	0.224741
DCHS2	1.72114	0.767612	2.2422	0.0249487	0.224741
LINC00152	-0.772753	0.344673	-2.24199	0.0249622	0.224741
B4GALT6	1.05395	0.470238	2.24131	0.025006	0.224743
SEC14L1	-0.683662	0.305036	-2.24125	0.0250098	0.224743
LOC100507516	-1.59202	0.710385	-2.24107	0.0250214	0.224743
TMEM45B	0.866287	0.386697	2.24022	0.0250764	0.224743
PDP2	0.711921	0.317797	2.24018	0.0250796	0.224743
GPR65	-1.70598	0.76157	-2.24008	0.0250857	0.224743
SPON1	-1.1861	0.529521	-2.23995	0.0250943	0.224743
ENG	-0.981923	0.438401	-2.23978	0.0251049	0.224743
ANUBL1	0.739165	0.330023	2.23974	0.0251081	0.224743
CAMK1D	-1.77746	0.794032	-2.23852	0.0251872	0.225306
KANK4	-2.22048	0.992436	-2.2374	0.0252602	0.225814
NFIX	0.756242	0.338123	2.23659	0.0253133	0.226061
CRTC1	-1.22194	0.546368	-2.23648	0.0253204	0.226061
MAEA	-0.530001	0.237042	-2.2359	0.0253585	0.226256
NT5C2	0.390906	0.174868	2.23543	0.0253891	0.226383
CLIC2	-1.2956	0.579889	-2.23422	0.0254684	0.226945
PRR15L	0.671094	0.300419	2.23386	0.0254922	0.227011
KLF2	1.05231	0.471199	2.23326	0.025532	0.22722
MPL	-1.41358	0.633224	-2.23236	0.0255912	0.227505
FLJ10038	-0.946835	0.424157	-2.23228	0.0255967	0.227505
UHRF2	-0.619987	0.277785	-2.23189	0.025622	0.227584
RALGAPA1	-0.430415	0.192898	-2.23131	0.0256605	0.22778
PLEKHM1	-0.685667	0.307386	-2.23064	0.0257048	0.228028
FBXO33	-0.61835	0.277332	-2.22964	0.0257713	0.228471
C6orf145	-0.985085	0.441987	-2.22876	0.0258297	0.228843
SEC24B	-0.31048	0.139345	-2.22813	0.0258716	0.229068
FGFR2	0.762689	0.342369	2.22768	0.0259017	0.229189
FBXL17	0.50913	0.228577	2.22739	0.0259214	0.229217
FMR1	-0.47948	0.215294	-2.22709	0.0259412	0.229246
CUX1	-0.406627	0.182708	-2.22555	0.0260441	0.229623
PDPK1	0.500373	0.224834	2.22552	0.0260464	0.229623
SLC25A36	-0.475554	0.213705	-2.22528	0.0260627	0.229623
C18orf25	-0.520413	0.233892	-2.22501	0.0260804	0.229623
PIP5K1A	-0.583239	0.262152	-2.22482	0.0260936	0.229623
LIMK1	-0.954601	0.429075	-2.22479	0.0260953	0.229623
TSTA3	0.722952	0.324962	2.22473	0.0260995	0.229623
TMX2	0.567068	0.255004	2.22376	0.0261643	0.230047
ABCB1	-1.778	0.800133	-2.22213	0.0262748	0.230852
GSTK1	0.558542	0.251379	2.22191	0.0262891	0.230852
TFE3	-0.870245	0.391993	-2.22005	0.0264153	0.231684
KCNJ8	-1.76918	0.796928	-2.22	0.026419	0.231684
CNST	0.546775	0.24632	2.21978	0.0264339	0.231684
PCYT1A	-0.63801	0.287548	-2.21879	0.0265009	0.232125
MUTYH	1.48058	0.667737	2.21731	0.0266016	0.232861
ZNF385A	-1.36866	0.617445	-2.21664	0.0266474	0.232916
CD38	-3.01744	1.36131	-2.21657	0.0266525	0.232916
DKK1	-1.13241	0.510902	-2.21649	0.0266583	0.232916
CCL22	-2.01988	0.911883	-2.21506	0.0267559	0.233622
SENP7	-0.482304	0.217939	-2.21302	0.0268961	0.234695
ANAPC5	0.558018	0.252179	2.21278	0.0269126	0.234695
BST2	1.01303	0.457873	2.21246	0.0269346	0.23474
VILL	0.889868	0.402273	2.2121	0.0269596	0.234752
DCLRE1C	0.610899	0.27618	2.21196	0.0269697	0.234752
FAM86C2P	1.39335	0.630283	2.21067	0.0270586	0.235378
IL33	1.58697	0.718403	2.20902	0.0271732	0.236226
RGS17	-2.02706	0.91774	-2.20875	0.0271919	0.236241
NGLY1	0.480997	0.217796	2.20848	0.027211	0.23626
LIFR	0.625798	0.283398	2.2082	0.0272306	0.236282
LOC100129502	-0.750171	0.339999	-2.20639	0.0273567	0.237228
MIR17HG	-1.22723	0.556358	-2.20584	0.0273953	0.237345
WDR77	0.767979	0.34826	2.20519	0.027441	0.237345
PDCD11	0.634979	0.287948	2.20518	0.0274414	0.237345
PAK1	0.498932	0.226264	2.20508	0.0274482	0.237345
SLC37A3	0.552852	0.250729	2.20498	0.0274556	0.237345
LEPROT	-0.41149	0.186647	-2.20464	0.0274792	0.237401
ZNF69	0.915982	0.41558	2.20411	0.0275169	0.237452
C1QTNF6	-1.37889	0.62561	-2.20407	0.0275192	0.237452
GPR1	-3.39002	1.53836	-2.20365	0.0275488	0.237512
KIAA1383	0.832456	0.37779	2.20349	0.0275604	0.237512
ZBTB44	-0.453203	0.205714	-2.20307	0.0275899	0.237606
BCL2L1	-0.53398	0.24242	-2.20271	0.0276153	0.237606
SCNN1A	-0.678798	0.30818	-2.2026	0.0276227	0.237606
MAP4K5	-0.360441	0.163739	-2.20132	0.0277134	0.238187
PGRMC2	-0.558102	0.253548	-2.20116	0.0277245	0.238187
ZNF514	-0.828619	0.376712	-2.19961	0.0278346	0.238877
KCNMB2	-1.88077	0.855226	-2.19915	0.0278672	0.238877
ARID5B	-0.580695	0.264058	-2.19912	0.0278696	0.238877
IARS	-0.419094	0.19058	-2.19904	0.0278752	0.238877
MAP4	-0.503131	0.228839	-2.19862	0.0279048	0.238877
CCNF	1.16513	0.530002	2.19836	0.0279234	0.238877
NCEH1	-0.548226	0.249382	-2.19834	0.0279251	0.238877
CHCHD10	-0.753114	0.342785	-2.19704	0.0280174	0.239518
MYO1C	-0.513531	0.233763	-2.1968	0.0280347	0.239519
FMO5	0.96198	0.438231	2.19514	0.0281534	0.240195
PCDHB16	-1.14727	0.522716	-2.19483	0.0281757	0.240195
GALNT7	0.414056	0.188666	2.19465	0.0281885	0.240195
YY2	-1.19228	0.543311	-2.19447	0.0282014	0.240195
CCDC144B	-1.16811	0.532338	-2.19429	0.0282143	0.240195
DPM1	0.592079	0.269832	2.19425	0.0282175	0.240195
ERBB3	0.483618	0.220477	2.19351	0.0282707	0.240429
ETV7	1.23925	0.564994	2.19339	0.0282796	0.240429
GPR160	0.663241	0.302492	2.19259	0.0283367	0.240767
ZNF234	0.793055	0.361813	2.1919	0.028387	0.241047
GNA12	-0.519269	0.236987	-2.19113	0.0284423	0.241122
PIGS	0.358756	0.163734	2.19109	0.0284451	0.241122
BANF1	-0.41249	0.188288	-2.19074	0.0284704	0.241122
MEI1	-3.70363	1.69079	-2.19048	0.0284895	0.241122
ERCC5	1.11504	0.509074	2.19034	0.0284999	0.241122
GPRIN3	-0.973253	0.44434	-2.19033	0.0285	0.241122
LMF1	1.26186	0.576335	2.18945	0.028564	0.241441
GRHL1	-0.872466	0.398536	-2.18918	0.0285839	0.241441
MBNL3	0.389472	0.177915	2.1891	0.0285899	0.241441
FEM1B	-0.605227	0.276597	-2.18812	0.0286607	0.241892
RABL2B	-1.07574	0.491815	-2.18728	0.0287223	0.242265
FNIP2	0.50772	0.232227	2.18631	0.028793	0.242643
PSMG4	0.929989	0.425394	2.18619	0.028802	0.242643
METTL8	-0.685861	0.313877	-2.18513	0.0288794	0.243138
TTC28	-1.08013	0.494362	-2.1849	0.0288958	0.243138
POLG2	-1.25103	0.572813	-2.18402	0.0289607	0.243473
SULT1B1	1.28491	0.58836	2.18389	0.0289707	0.243473
SRPRB	0.494465	0.226519	2.18288	0.0290445	0.243946
LOC100509205	1.95417	0.895341	2.1826	0.0290656	0.243975
LOC285758	-1.58054	0.724487	-2.18159	0.0291395	0.244334
AP1B1	-0.540837	0.247915	-2.18154	0.0291435	0.244334
DDX55	0.664502	0.304675	2.18102	0.029182	0.244458
CASP3	0.467667	0.214441	2.18086	0.0291935	0.244458
PIAS3	-0.555775	0.254924	-2.18016	0.0292458	0.244748
SHC1	-0.364874	0.167434	-2.17921	0.0293164	0.245136
MDN1	-0.563972	0.258846	-2.17879	0.0293472	0.245136
NDUFA4L2	-2.22353	1.02067	-2.17849	0.0293694	0.245136
ETNK2	-1.95214	0.896148	-2.17837	0.0293785	0.245136
SSSCA1	-0.845356	0.388101	-2.17819	0.0293921	0.245136
PPP2R5A	0.461764	0.212021	2.17792	0.0294123	0.245136
NFKBIA	-0.498303	0.228828	-2.17764	0.0294332	0.245136
CUL2	0.507727	0.233163	2.17756	0.0294386	0.245136
ANKRD36	-0.634569	0.291434	-2.1774	0.0294509	0.245136
COL1A2	-0.714574	0.328239	-2.17699	0.0294813	0.245242
FAM184A	-1.40148	0.643974	-2.1763	0.0295325	0.245521
CENPO	-1.13008	0.51935	-2.17594	0.0295595	0.245598
WDFY1	-0.517565	0.237962	-2.17499	0.029631	0.246046
CDCA7	0.868058	0.399226	2.17435	0.0296788	0.24616
DAB2	-0.718892	0.330645	-2.17421	0.0296894	0.24616
PIGF	0.997809	0.458953	2.1741	0.0296979	0.24616
MTHFD1L	-0.793149	0.364891	-2.17366	0.0297309	0.246286
SARNP	0.61245	0.281833	2.17309	0.0297733	0.246377
C1orf38	-1.31653	0.605849	-2.17304	0.0297774	0.246377
PKD2	-0.640191	0.294834	-2.17136	0.029904	0.24721
COL4A4	-1.39608	0.643004	-2.17118	0.0299179	0.24721
ADRB2	-2.31322	1.06557	-2.17087	0.0299407	0.24721
TM7SF3	-0.496102	0.228542	-2.17073	0.0299517	0.24721
UBE2N	-0.532316	0.245248	-2.17053	0.029967	0.24721
MGAT4B	0.580189	0.267408	2.16968	0.0300312	0.247259
CLIC4	-0.550449	0.253706	-2.16963	0.0300349	0.247259
LOC285359	-0.671882	0.3097	-2.16946	0.0300479	0.247259
ARAF	0.62482	0.288044	2.16919	0.0300686	0.247259
HMGA2	-1.21146	0.558511	-2.1691	0.0300754	0.247259
SETD8	-0.606728	0.279778	-2.16861	0.0301125	0.247259
TIMP4	-2.03012	0.936159	-2.16857	0.0301156	0.247259
KEAP1	0.680319	0.313775	2.16817	0.0301455	0.247259
CSNK2B	-0.505379	0.233119	-2.16791	0.0301659	0.247259
LOC100506342	-1.11452	0.514106	-2.16788	0.0301679	0.247259
SLITRK4	-2.10649	0.971689	-2.16787	0.0301687	0.247259
PTGFR	-2.78538	1.28572	-2.16639	0.0302815	0.247896
SSH3	-0.849853	0.392292	-2.16638	0.0302821	0.247896
RNF207	-1.27713	0.589601	-2.1661	0.0303038	0.247927
LOC100506385	1.55147	0.716422	2.16558	0.030343	0.248102
ASXL2	-0.339726	0.15692	-2.16496	0.0303905	0.248344
MMP9	-1.80518	0.834306	-2.16369	0.0304882	0.248841
MASTL	-0.632841	0.292513	-2.16346	0.0305055	0.248841
ATXN2	-0.46718	0.215961	-2.16327	0.0305207	0.248841
GAB1	-0.475323	0.219728	-2.16324	0.030523	0.248841
TSHZ3	-1.32075	0.61072	-2.16261	0.030571	0.248942
SNAP29	-0.500536	0.23145	-2.16261	0.0305712	0.248942
ANP32E	-0.422906	0.195615	-2.16192	0.0306241	0.249065
TBL1X	-0.79079	0.365826	-2.16166	0.0306446	0.249065
SH3RF3	-1.67198	0.773516	-2.16153	0.0306544	0.249065
UGT8	0.616465	0.285234	2.16126	0.0306756	0.249065
SLC16A6	-1.77547	0.8215	-2.16125	0.0306759	0.249065
FBXL13	-1.09515	0.506877	-2.16059	0.0307267	0.249331
SLC5A1	0.899777	0.416638	2.15962	0.0308024	0.2498
ZSWIM7	-0.925659	0.429035	-2.15754	0.030964	0.250828
CASP7	0.645204	0.299049	2.15752	0.0309654	0.250828
PRICKLE2	-0.918877	0.425969	-2.15715	0.0309942	0.250915
IFNGR1	-0.489732	0.22713	-2.15618	0.0310697	0.25138
GPX7	-1.74621	0.810171	-2.15536	0.0311333	0.251625
ASCC3	-0.34812	0.161516	-2.15533	0.0311361	0.251625
FADS1	-0.806621	0.374448	-2.15416	0.0312273	0.252215
MTRNR2L9	0.949457	0.441018	2.15287	0.0313286	0.252624
KLHL5	-0.583014	0.270812	-2.15284	0.0313314	0.252624
MPZL1	0.378342	0.175749	2.15274	0.0313389	0.252624
TNFRSF10A	0.932663	0.433295	2.15249	0.0313588	0.252624
ZNF678	-0.512203	0.237996	-2.15215	0.0313857	0.252624
KCNS3	-1.37748	0.640054	-2.15213	0.0313871	0.252624
IPW	-1.22476	0.569315	-2.15128	0.031454	0.253016
FAM108C1	0.456165	0.212223	2.14947	0.0315975	0.254023
PTK7	-0.873211	0.406307	-2.14914	0.0316233	0.254084
SPAG17	-1.17504	0.546833	-2.14881	0.0316494	0.254146
ITPR2	-0.589348	0.274307	-2.1485	0.0316742	0.254173
CELSR1	-0.595315	0.277109	-2.14831	0.0316893	0.254173
BAMBI	-0.944503	0.439797	-2.14759	0.0317464	0.254485
OGFOD1	-0.421789	0.196448	-2.14708	0.0317872	0.254664
C4orf10	-0.936539	0.436248	-2.1468	0.031809	0.254692
RASGEF1A	-1.46472	0.682528	-2.14602	0.0318712	0.255043
TSHZ2	-0.737371	0.343687	-2.14547	0.031915	0.255235
FOXP2	-1.42672	0.665157	-2.14494	0.0319576	0.255235
LMOD1	-1.32265	0.616678	-2.1448	0.0319687	0.255235
PAWR	-0.372278	0.17362	-2.14422	0.0320154	0.255235
HLX	-2.27313	1.06013	-2.14419	0.0320175	0.255235
CLDND1	-0.418075	0.19502	-2.14375	0.032053	0.255235
ANKRD13B	-2.06968	0.965458	-2.14372	0.0320549	0.255235
PELI1	0.487685	0.227517	2.14351	0.032072	0.255235
ABCA5	-0.698188	0.325736	-2.14342	0.0320795	0.255235
ZNF516	-0.721912	0.336813	-2.14336	0.0320839	0.255235
ARFIP2	0.626565	0.292351	2.1432	0.0320973	0.255235
GCNT1	0.869769	0.405885	2.1429	0.0321214	0.255267
C14orf93	-1.17648	0.549069	-2.14269	0.0321381	0.255267
CDK13	-0.464532	0.216983	-2.14087	0.0322845	0.256274
DDX28	1.29559	0.605232	2.14066	0.0323018	0.256274
HDAC2	-0.393509	0.183943	-2.1393	0.0324116	0.256999
COL1A1	-0.765858	0.358264	-2.13769	0.0325418	0.257726
TMEM63A	0.52478	0.24551	2.13751	0.0325567	0.257726
C1orf201	-0.844995	0.395361	-2.13727	0.0325758	0.257726
APH1B	-0.852744	0.398991	-2.13725	0.0325776	0.257726
MRPS11	-0.65449	0.306268	-2.13699	0.0325992	0.25775
FER	-0.563972	0.26395	-2.13667	0.0326251	0.257809
ALDH1A1	0.739236	0.346122	2.13577	0.0326985	0.258183
RNF139	-0.478042	0.223847	-2.13557	0.0327144	0.258183
PON2	-0.540273	0.253008	-2.1354	0.0327283	0.258183
ZNF642	1.00059	0.468635	2.13511	0.0327522	0.258225
PRLR	1.01938	0.477534	2.13468	0.0327876	0.258261
ABL2	-0.560346	0.262521	-2.13448	0.0328033	0.258261
C18orf8	0.635022	0.297533	2.13429	0.0328188	0.258261
AKR1A1	0.630875	0.29561	2.13414	0.0328311	0.258261
CASC4	0.336953	0.157916	2.13375	0.0328633	0.258369
TMC7	0.76352	0.357898	2.13334	0.0328967	0.258379
ZNF14	0.879819	0.412437	2.13322	0.0329067	0.258379
RNF146	-0.642331	0.301132	-2.13305	0.0329205	0.258379
ENOX1	-1.61524	0.7575	-2.13233	0.0329796	0.258639
GNB4	-0.845405	0.396495	-2.1322	0.0329908	0.258639
C3orf52	0.787132	0.369269	2.1316	0.03304	0.258879
EBF3	-1.93011	0.905942	-2.1305	0.0331304	0.25944
TMX3	-0.470712	0.220965	-2.13026	0.0331504	0.259451
UFL1	-0.35242	0.165497	-2.12947	0.0332153	0.259812
SEMA6D	1.35054	0.634322	2.1291	0.0332456	0.259903
FUNDC2	-0.599157	0.281525	-2.12825	0.0333162	0.260309
CCDC89	-2.17625	1.02272	-2.1279	0.0333451	0.260388
NFASC	-1.48062	0.696727	-2.1251	0.0335783	0.262062
CD2	-2.13406	1.00488	-2.12369	0.0336957	0.26283
BACE1	-0.593862	0.279703	-2.12319	0.0337379	0.262943
ENO1	-0.451843	0.212825	-2.12307	0.033748	0.262943
SUGP2	-0.641884	0.302412	-2.12255	0.0337916	0.263092
PTRH1	1.57409	0.741659	2.12239	0.033805	0.263092
LRFN5	-3.60734	1.6999	-2.12209	0.0338302	0.263141
TTLL7	-1.27006	0.598746	-2.12119	0.0339056	0.26358
LOC100132909	1.03986	0.490451	2.12022	0.0339877	0.264057
IPO11	0.490575	0.231402	2.12001	0.034005	0.264057
POLR2A	-0.475797	0.224534	-2.11905	0.0340865	0.264541
ITGAX	-1.44373	0.681676	-2.11792	0.0341821	0.265136
CREB1	-0.365752	0.172752	-2.11721	0.0342424	0.265306
CAPN9	1.21787	0.575278	2.11702	0.0342583	0.265306
KLF5	0.463147	0.218798	2.11678	0.0342788	0.265306
COL5A1	-0.847565	0.400514	-2.1162	0.0343282	0.265306
H3F3B	-0.389908	0.184252	-2.11617	0.0343305	0.265306
PDLIM5	-0.320526	0.15147	-2.11611	0.0343358	0.265306
RNF26	-0.57865	0.273492	-2.11578	0.0343632	0.265306
RPS6KA3	0.352127	0.16644	2.11564	0.0343757	0.265306
WDR46	-0.830106	0.39241	-2.1154	0.0343956	0.265306
XPO5	-0.590117	0.278982	-2.11525	0.0344085	0.265306
RTN3	-0.333887	0.157878	-2.11485	0.0344429	0.265306
PTDSS2	1.32571	0.626863	2.11483	0.0344443	0.265306
CREB3L1	0.743992	0.351813	2.11474	0.0344523	0.265306
RASSF6	0.516092	0.244104	2.11423	0.0344955	0.265491
GGTA1P	-3.25365	1.53916	-2.11391	0.0345227	0.265553
YWHAG	-0.328819	0.155585	-2.11344	0.0345635	0.265634
UBE2E1	-0.489346	0.231562	-2.11323	0.0345808	0.265634
TMTC3	-0.414115	0.195973	-2.11312	0.0345905	0.265634
LSG1	-0.503695	0.238408	-2.11275	0.0346224	0.26565
CD1D	-3.81238	1.80455	-2.11265	0.0346309	0.26565
TTC13	0.61662	0.291919	2.1123	0.0346607	0.265732
TBL3	1.08066	0.511826	2.11138	0.0347401	0.265775
TMEM136	-1.24825	0.591249	-2.1112	0.0347551	0.265775
APOL1	-0.739795	0.350419	-2.11117	0.0347573	0.265775
SLC25A12	-0.803474	0.380606	-2.11104	0.0347689	0.265775
COL6A1	-0.946928	0.448586	-2.11092	0.0347793	0.265775
PDE8B	-1.50642	0.713639	-2.1109	0.0347811	0.265775
PRC1	-0.680193	0.322304	-2.11041	0.0348232	0.26595
CCND1	-0.443377	0.210116	-2.11016	0.0348449	0.26597
KCND1	-1.52742	0.723993	-2.10972	0.0348823	0.266109
PHGDH	-1.1478	0.544179	-2.10923	0.0349244	0.266137
FYTTD1	-0.347349	0.164681	-2.10922	0.0349254	0.266137
IMPA1	0.71654	0.339774	2.10887	0.0349556	0.266137
TBC1D1	0.396354	0.187957	2.10875	0.0349661	0.266137
CRYL1	1.012	0.479948	2.10857	0.0349818	0.266137
METTL21D	-1.19712	0.568077	-2.10731	0.0350904	0.266659
GABBR1	-1.10196	0.522949	-2.1072	0.0351006	0.266659
ASF1A	-0.4788	0.227231	-2.10711	0.0351079	0.266659
H2AFV	0.40473	0.192136	2.10648	0.035163	0.266932
CXCL11	1.86804	0.886919	2.10621	0.0351862	0.266962
FOXC1	-0.758664	0.360274	-2.10579	0.0352222	0.267089
MPV17	-0.59436	0.282402	-2.10466	0.0353212	0.267564
ANAPC10	0.582011	0.276538	2.10463	0.0353234	0.267564
ABCG1	0.890685	0.423324	2.10403	0.0353761	0.267817
PWP2	1.12511	0.535143	2.10245	0.0355141	0.26863
BAG2	-1.24192	0.59073	-2.10236	0.0355221	0.26863
GNAL	-1.21027	0.575831	-2.10178	0.0355728	0.268673
ANXA2P1	0.546562	0.260054	2.10172	0.0355776	0.268673
IRAK3	-0.826147	0.39312	-2.10151	0.0355959	0.268673
TES	-0.359273	0.170968	-2.10141	0.0356052	0.268673
NUP35	-0.744906	0.354637	-2.10048	0.035687	0.269144
PARP10	-1.15957	0.552226	-2.09982	0.0357447	0.269271
LOC100652766	-0.699309	0.333057	-2.09967	0.0357581	0.269271
ZC3H12D	-2.24228	1.06794	-2.09962	0.0357619	0.269271
CLDN1	-0.575558	0.274207	-2.09899	0.0358174	0.269485
GSTA4	-1.2178	0.580221	-2.09886	0.0358291	0.269485
SBNO1	-0.367089	0.17492	-2.09862	0.0358508	0.269502
ENAH	-0.432628	0.206192	-2.09817	0.0358898	0.269649
CCDC165	-0.916953	0.437186	-2.0974	0.0359585	0.269817
ZMYND11	-0.38081	0.181581	-2.09719	0.0359769	0.269817
CCL11	-3.36245	1.60331	-2.09718	0.0359773	0.269817
BRAT1	-1.19875	0.57164	-2.09704	0.0359898	0.269817
TOLLIP	0.739473	0.352698	2.09662	0.0360272	0.269951
FBN1	-0.69048	0.329527	-2.09536	0.0361386	0.27064
NUP107	-0.457852	0.218534	-2.09511	0.0361614	0.270665
PKP4	0.32024	0.152872	2.09483	0.0361864	0.270707
PLBD1	0.481386	0.229841	2.09443	0.0362219	0.270757
RAB28	-0.71775	0.34276	-2.09403	0.0362575	0.270757
TOR1A	-0.614652	0.293577	-2.09366	0.03629	0.270757
ZNF295	0.509028	0.243136	2.0936	0.0362956	0.270757
CAV2	-0.567234	0.270939	-2.09358	0.0362971	0.270757
NDUFC2	0.689225	0.32927	2.09319	0.036332	0.270757
SCFD1	-0.337556	0.161266	-2.09316	0.0363348	0.270757
TUSC1	1.57729	0.753643	2.09289	0.0363589	0.270757
SRGAP2P2	-1.00311	0.479321	-2.09278	0.0363686	0.270757
CHST15	-0.793269	0.379148	-2.09224	0.036417	0.270765
RPL4	-0.410198	0.196058	-2.09223	0.0364177	0.270765
PDSS1	0.966145	0.461803	2.09212	0.0364281	0.270765
CEP135	-0.621579	0.297398	-2.09006	0.0366128	0.271667
PDE7B	-1.47157	0.704103	-2.09	0.0366182	0.271667
DUT	-0.685267	0.327927	-2.0897	0.0366452	0.271667
ZNF738	0.912326	0.436596	2.08963	0.036651	0.271667
C7orf63	-0.797449	0.381651	-2.08948	0.0366649	0.271667
DDIT4	-0.686726	0.328663	-2.08945	0.0366668	0.271667
ATP10B	1.01416	0.48543	2.0892	0.03669	0.271693
PCDHGB8P	-1.22017	0.584256	-2.08843	0.0367595	0.272006
NSF	0.416846	0.199631	2.08808	0.036791	0.272006
EIF3L	-0.507233	0.242919	-2.08808	0.036791	0.272006
ITGA8	-2.00312	0.95984	-2.08693	0.0368944	0.272626
ANKH	-0.627317	0.300699	-2.08619	0.036961	0.272973
CLEC4E	-3.08875	1.48084	-2.0858	0.0369966	0.273091
LOC100130027	1.95461	0.937225	2.08553	0.0370215	0.273129
ZNF431	-0.65306	0.313179	-2.08526	0.0370455	0.273162
RBMS2	-0.502845	0.241196	-2.0848	0.0370877	0.273328
FER1L6	1.30115	0.624291	2.08421	0.0371409	0.27343
MTMR2	-0.412944	0.19815	-2.084	0.0371602	0.27343
VNN2	-1.7083	0.819759	-2.08391	0.0371683	0.27343
WDFY3	-0.317012	0.152136	-2.08375	0.0371832	0.27343
C12orf76	-1.34118	0.643697	-2.08356	0.0372	0.27343
MAGOH	0.795907	0.382089	2.08304	0.0372473	0.273633
SIGLEC6	-2.67287	1.28335	-2.08272	0.0372767	0.273678
HES1	0.491358	0.235962	2.08237	0.0373091	0.273678
SCG5	-1.60261	0.769626	-2.08233	0.0373126	0.273678
TUBB6	-0.957578	0.460022	-2.08159	0.0373796	0.273852
KATNAL1	-0.742175	0.356548	-2.08156	0.0373828	0.273852
RCAN2	-1.33933	0.643471	-2.08142	0.0373954	0.273852
MAOA	0.631727	0.30355	2.08113	0.0374222	0.273904
ZMAT3	-0.589418	0.28325	-2.08091	0.0374423	0.273906
ST5	-0.647401	0.311307	-2.07962	0.0375603	0.27429
ADAM12	-1.23821	0.595503	-2.07927	0.0375921	0.27429
METTL2B	-0.567561	0.272965	-2.07924	0.0375951	0.27429
BCAT1	-1.18364	0.56932	-2.07905	0.037613	0.27429
IFI6	0.729409	0.350915	2.07859	0.0376549	0.27429
ZNF346	0.801885	0.385791	2.07854	0.0376592	0.27429
ANKS1B	-2.72889	1.31293	-2.07847	0.0376659	0.27429
BEST1	-2.83354	1.36329	-2.07846	0.0376672	0.27429
MRPL18	-0.545017	0.262229	-2.0784	0.0376725	0.27429
TMC5	0.608587	0.292866	2.07804	0.0377056	0.274388
PRKAR2B	-1.44307	0.694777	-2.07703	0.037799	0.274923
PLAC8	0.830788	0.400036	2.07678	0.0378215	0.274943
SEC62	-0.336432	0.162015	-2.07655	0.0378436	0.27496
OBFC1	0.624736	0.300921	2.07608	0.0378865	0.275128
KIAA0020	-0.570442	0.274813	-2.07575	0.0379173	0.275135
KIAA0922	-0.751132	0.361885	-2.07561	0.0379301	0.275135
GTF3A	-0.415115	0.200014	-2.07543	0.0379469	0.275135
TUSC3	-1.33853	0.645284	-2.07433	0.0380484	0.275727
SEPT7	-0.300081	0.144696	-2.07388	0.0380909	0.275891
UNC5B	-0.880926	0.424975	-2.07289	0.0381825	0.276385
LOC100287765	1.01201	0.488258	2.0727	0.0382003	0.276385
CUEDC1	-1.37592	0.663892	-2.0725	0.0382187	0.276385
TFEB	1.10474	0.53355	2.07054	0.0384017	0.277562
LOC541471	-0.806755	0.389675	-2.07033	0.0384215	0.277562
TMEM156	-2.71602	1.31203	-2.07009	0.0384436	0.277566
LOC100133299	-1.13405	0.547877	-2.0699	0.038462	0.277566
ZNF432	-0.820694	0.396599	-2.06933	0.0385153	0.277806
SDHAF1	-1.4286	0.691149	-2.06699	0.038735	0.279245
TRIM59	-0.524917	0.253998	-2.06661	0.0387705	0.279357
ACOT13	-0.549588	0.265967	-2.06637	0.0387931	0.279375
ZFP36L1	-0.525308	0.254247	-2.06613	0.0388161	0.279395
AQP3	-0.966331	0.467852	-2.06546	0.0388793	0.279662
SNHG7	-1.39042	0.673231	-2.0653	0.0388949	0.279662
DNAH7	-0.977124	0.473201	-2.06492	0.0389303	0.279662
MCART6	-2.23039	1.08023	-2.06473	0.0389487	0.279662
ZC3HAV1L	0.747829	0.362202	2.06467	0.0389538	0.279662
NDUFV2	-0.429861	0.208232	-2.06434	0.0389853	0.279743
GNL1	-0.743286	0.360344	-2.06271	0.0391398	0.280708
LGALS9	0.622707	0.30194	2.06235	0.0391743	0.280736
B3GALT6	-0.91053	0.441523	-2.06225	0.0391842	0.280736
CYP4V2	0.554557	0.268941	2.062	0.0392075	0.280758
ISOC2	-0.902594	0.437795	-2.06168	0.039238	0.280832
WT1	-3.58849	1.74084	-2.06135	0.0392692	0.280911
FBLIM1	0.673556	0.326835	2.06084	0.0393179	0.281114
ARHGAP30	-1.18108	0.573183	-2.06056	0.039345	0.281163
ZNF490	0.730773	0.354736	2.06005	0.0393942	0.28137
ASB6	-0.773011	0.375315	-2.05963	0.0394335	0.281506
TTC7A	-0.654103	0.317905	-2.05754	0.0396344	0.282532
ZNF207	-0.27146	0.131943	-2.0574	0.0396481	0.282532
ARHGAP5	-0.30251	0.147044	-2.05728	0.0396594	0.282532
HSP90AB1	-0.338258	0.164441	-2.05702	0.0396847	0.282532
CTIF	-0.991287	0.481951	-2.05682	0.0397036	0.282532
ADCY5	-1.92569	0.936267	-2.05678	0.0397078	0.282532
EPS8	-0.324213	0.157641	-2.05665	0.0397196	0.282532
PGBD2	0.946215	0.460166	2.05625	0.0397587	0.282656
NLRP3	-2.92678	1.4235	-2.05605	0.0397777	0.282656
PRDM5	-1.05866	0.515242	-2.05469	0.0399094	0.283446
GPR110	-0.86797	0.422745	-2.05318	0.0400554	0.284222
FAN1	0.664629	0.323722	2.05309	0.0400641	0.284222
EIF4G1	-0.380305	0.18525	-2.05292	0.0400799	0.284222
EFNB3	-2.49943	1.21769	-2.0526	0.0401118	0.284303
FRAS1	0.744817	0.362968	2.05202	0.0401678	0.284325
KCNAB2	1.32703	0.646732	2.05191	0.0401788	0.284325
HKDC1	0.649632	0.316614	2.05181	0.0401881	0.284325
PYGO2	0.597934	0.291431	2.05172	0.0401969	0.284325
ATAT1	-1.10286	0.537694	-2.05109	0.0402581	0.284614
C11orf93	1.01042	0.49269	2.05082	0.0402849	0.284658
ZNF696	1.1982	0.58444	2.05016	0.0403488	0.284907
LBH	-0.774418	0.377759	-2.05003	0.0403612	0.284907
CERS6	0.403875	0.197049	2.04962	0.0404017	0.285048
GPR176	-1.58016	0.771114	-2.0492	0.040443	0.285091
NDOR1	1.08566	0.529812	2.04914	0.0404487	0.285091
VSIG10	0.573528	0.279997	2.04834	0.0405269	0.285497
GPR125	-0.434886	0.212357	-2.0479	0.0405697	0.285653
HSBP1	-0.543763	0.265579	-2.04746	0.0406127	0.285692
CYB5D2	-1.07832	0.526674	-2.04743	0.0406164	0.285692
ALMS1	-0.386431	0.188802	-2.04675	0.0406824	0.285929
CHSY3	-1.99076	0.972687	-2.04666	0.0406919	0.285929
NOP56	-0.52977	0.258894	-2.04628	0.0407286	0.285929
YPEL2	-0.61164	0.298908	-2.04625	0.0407323	0.285929
LOC400986	-0.857042	0.418909	-2.04589	0.0407673	0.28603
PCDHB12	-1.20021	0.586705	-2.04568	0.0407883	0.286032
MAP3K11	-0.838681	0.410019	-2.04547	0.0408087	0.286032
PISD	-0.837253	0.409507	-2.04454	0.0409005	0.286423
MARVELD2	0.496321	0.242761	2.04448	0.0409058	0.286423
O3FAR1	1.46411	0.7167	2.04285	0.0410672	0.287287
NCAPH2	-1.14317	0.559603	-2.04282	0.0410706	0.287287
ARHGAP6	1.05709	0.517696	2.04191	0.0411602	0.287769
PCDHB4	-1.47329	0.721847	-2.041	0.0412511	0.288161
P2RY1	-1.48378	0.72701	-2.04093	0.0412577	0.288161
FLJ41757	-1.26493	0.6201	-2.03989	0.0413616	0.288741
C4orf34	-0.508179	0.249204	-2.03921	0.0414295	0.289058
AQP11	1.30359	0.639387	2.03882	0.0414679	0.289058
TOP3B	-1.38243	0.678057	-2.03881	0.0414693	0.289058
GALNT5	0.687901	0.33752	2.03811	0.0415391	0.289283
MYB	0.995298	0.488357	2.03806	0.0415443	0.289283
LOC100506190	-1.41804	0.695869	-2.0378	0.0415697	0.289283
HSPA8	-0.322751	0.158394	-2.03765	0.041585	0.289283
AKR1C2	-1.26167	0.619312	-2.03722	0.0416284	0.28944
ATAD2B	-0.496743	0.243894	-2.03672	0.0416784	0.289643
[truncated: 11,893 more rows]

## Sheet: Paired_Stroma_DEG
gene	baseMean	logFC	lfcSE	stat	pvalue	padj	change
MUC5B	281.272	4.1645	0.58271	7.14678	8.88e-13	1.21e-08	UP
KRT17	67.1701	3.12087	0.517558	6.02998	1.64e-09	1.12e-05	UP
PTGS2	272.645	1.96325	0.339303	5.78613	7.2e-09	3.27e-05	UP
TFAP2A	11.7009	4.05683	0.712365	5.69488	1.23e-08	4.2e-05	UP
SLC34A2	136.57	6.10729	1.09888	5.55776	2.73e-08	7.44e-05	UP
WFDC2	62.459	2.94299	0.534837	5.5026	3.74e-08	8.5e-05	UP
LOC100506200	25.062	2.78337	0.513791	5.41731	6.05e-08	0.000117737	UP
CP	143.084	3.53644	0.66462	5.32099	1.03e-07	0.000175729	UP
PSCA	46.8805	4.18866	0.792436	5.2858	1.25e-07	0.000189428	UP
IL1R2	58.2502	3.97354	0.777997	5.1074	3.27e-07	0.000444924	UP
HSPA5	2773.77	0.935751	0.185762	5.03737	4.72e-07	0.000584469	NOT
SERPINA1	947.229	1.7929	0.366209	4.89584	9.79e-07	0.00111117	UP
LCN2	250.98	2.83125	0.584394	4.84476	1.27e-06	0.00132828	UP
TK1	22.0765	3.69251	0.768214	4.80662	1.54e-06	0.0014936	UP
CMKLR1	123.056	-2.12387	0.44599	-4.76215	1.92e-06	0.00173948	DOWN
FUT3	4.9128	4.6338	0.976094	4.74728	2.06e-06	0.00175525	UP
LOC100616668	4.46862	4.923	1.052	4.67967	2.87e-06	0.00230246	UP
FOXA1	7.37853	2.97668	0.643978	4.62233	3.79e-06	0.00287165	UP
VEGFA	627.219	1.58576	0.346597	4.57521	4.76e-06	0.0033348	UP
AFF3	79.4699	-2.04773	0.448161	-4.56919	4.9e-06	0.0033348	DOWN
RASSF7	4.47908	5.46461	1.20562	4.53262	5.83e-06	0.00371979	UP
IL20RB	8.71517	3.80424	0.840508	4.52612	6.01e-06	0.00371979	UP
GTPBP3	6.52906	-4.14077	0.919017	-4.50564	6.62e-06	0.00384556	DOWN
HLA-L	7.06354	3.36916	0.748598	4.50063	6.78e-06	0.00384556	UP
E2F5	13.9483	2.37504	0.53138	4.46958	7.84e-06	0.0042705	UP
CLDN18	190.97	-2.38646	0.539412	-4.42418	9.68e-06	0.005072	DOWN
ZNF692	8.84786	3.23872	0.744521	4.35007	1.36e-05	0.00686611	UP
ITGA3	173.894	1.92851	0.444593	4.33769	1.44e-05	0.00700502	UP
SNCAIP	13.402	2.18446	0.507326	4.30582	1.66e-05	0.0078146	UP
MUC6	83.4707	3.16939	0.747259	4.24135	2.22e-05	0.010048	UP
THTPA	34.9295	-2.3366	0.551751	-4.23489	2.29e-05	0.010048	DOWN
IKZF1	175.613	-1.49504	0.353681	-4.22708	2.37e-05	0.0100778	DOWN
ARHGAP32	393.88	1.08837	0.258829	4.20499	2.61e-05	0.0107777	UP
CLDN3	13.6755	3.67492	0.881077	4.17094	3.03e-05	0.0121533	UP
SERPINA3	227.908	2.47606	0.595439	4.15837	3.21e-05	0.0124748	UP
RCBTB2	91.6282	-1.26455	0.306366	-4.12758	3.67e-05	0.0138528	DOWN
CEBPA	7.58541	-2.791	0.677166	-4.12159	3.76e-05	0.0138528	DOWN
APOL3	78.0625	-1.66053	0.408073	-4.0692	4.72e-05	0.0169106	DOWN
MUC5AC	58.5716	2.86133	0.706473	4.05016	5.12e-05	0.0178768	UP
GRB7	3.27346	4.41183	1.09322	4.03561	5.45e-05	0.0184802	UP
ITGB4	140.738	1.82815	0.453562	4.03065	5.56e-05	0.0184802	UP
VSIG1	5.99187	-2.90676	0.723755	-4.01622	5.91e-05	0.0191455	DOWN
LOC253039	28.2174	-2.32898	0.580632	-4.0111	6.04e-05	0.0191455	DOWN
COL7A1	31.907	2.49302	0.623011	4.00157	6.29e-05	0.0194808	UP
MFSD10	24.5491	1.9946	0.500925	3.98184	6.84e-05	0.0207008	UP
SOX5	148.865	-1.57204	0.396738	-3.96243	7.42e-05	0.0219701	DOWN
SRSF12	14.7441	2.0376	0.521023	3.91078	9.2e-05	0.0266639	UP
TM4SF4	45.2935	2.45589	0.630457	3.89541	9.8e-05	0.0278204	UP
DPCR1	497.817	2.78403	0.716109	3.88772	0.000101188	0.0281304	UP
SAMHD1	962.646	-0.783284	0.202069	-3.87631	0.000106053	0.028893	NOT
TMC4	10.6028	2.52164	0.653104	3.86101	0.000112921	0.0301348	UP
ABHD4	114.762	1.23158	0.319938	3.84942	0.000118397	0.0301348	UP
TMOD2	257.87	-0.912184	0.237004	-3.84881	0.000118694	0.0301348	NOT
LOXL3	38.459	2.06803	0.537865	3.84489	0.000120609	0.0301348	UP
HSPD1	582.254	0.728705	0.18982	3.83893	0.00012357	0.0301348	NOT
PRSS1	13.9084	3.26607	0.850914	3.83831	0.000123884	0.0301348	UP
CD5	32.4061	-2.04531	0.539209	-3.79317	0.000148739	0.0355459	DOWN
KRT7	91.9602	1.44239	0.381109	3.78471	0.000153885	0.0359211	UP
MMP9	78.1923	2.99058	0.790744	3.78199	0.000155582	0.0359211	UP
MED25	26.8279	2.14977	0.571027	3.76475	0.000166717	0.0378503	UP
SVEP1	785.161	-0.780726	0.208405	-3.7462	0.000179533	0.0396093	NOT
TPPP	4.5666	4.86435	1.29884	3.74516	0.00018028	0.0396093	UP
FAM160A1	16.8485	2.96588	0.794017	3.73529	0.000187498	0.0402718	UP
FUNDC2	123.25	-0.900872	0.241326	-3.73301	0.000189209	0.0402718	NOT
HMGA1	213.143	1.13367	0.306007	3.70473	0.000211615	0.044348	UP
C9orf89	23.9361	2.1434	0.579899	3.69615	0.000218891	0.0451778	UP
CLSPN	34.5455	1.55333	0.421135	3.68843	0.00022564	0.0458756	UP
WNT7B	11.2456	3.46776	0.942313	3.68005	0.00023319	0.0464994	UP
C17orf63	136.059	1.19851	0.325904	3.6775	0.000235535	0.0464994	UP
C6orf120	182.3	-1.08692	0.296184	-3.66975	0.000242786	0.0472461	DOWN
ADM	51.5392	2.21326	0.605347	3.65618	0.000256005	0.0491168	UP
ARHGEF6	607.119	-0.972789	0.266329	-3.65259	0.00025961	0.0491168	NOT
FAM83A	22.9402	2.94138	0.806958	3.64503	0.000267363	0.0498907	UP
TCN1	60.0334	2.47187	0.680118	3.63447	0.000278556	0.0502701	UP
APLP2	1902.73	0.580262	0.159708	3.63326	0.000279867	0.0502701	NOT
ZFP36L1	3163.19	0.684457	0.188448	3.63208	0.000281145	0.0502701	NOT
PEG10	59.9184	1.50737	0.415331	3.62933	0.000284158	0.0502701	UP
SOX9	135.937	1.55293	0.429412	3.61641	0.000298717	0.0521682	UP
NQO1	86.7555	1.51865	0.421201	3.60553	0.000311513	0.0537142	UP
TMEM205	22.981	1.73931	0.484431	3.59043	0.000330137	0.05566	UP
BAIAP2L1	89.0889	1.63801	0.456708	3.58656	0.000335067	0.05566	UP
SGOL1	23.3689	1.74589	0.487295	3.58283	0.000339895	0.05566	UP
THNSL1	20.3931	-1.67817	0.468648	-3.58087	0.000342457	0.05566	DOWN
S100A16	162.654	0.970874	0.271464	3.57643	0.000348314	0.05566	NOT
NAALAD2	25.4027	-1.82931	0.511917	-3.57345	0.000352315	0.05566	DOWN
VAMP1	24.8183	-2.17557	0.609477	-3.56958	0.00035756	0.05566	DOWN
EREG	14.9612	2.18507	0.612141	3.56956	0.000357584	0.05566	UP
TXNDC16	115.52	-1.2682	0.355426	-3.56811	0.000359571	0.05566	DOWN
GREB1	98.9079	-1.28263	0.360238	-3.56052	0.000370121	0.0566493	DOWN
CD84	294.72	-0.922987	0.259503	-3.55675	0.000375472	0.0568297	NOT
TNFAIP8L1	36.3347	2.08509	0.587027	3.55195	0.000382387	0.0572404	UP
CLTA	176.27	1.02321	0.288566	3.54586	0.000391334	0.0579429	UP
CEACAM1	144.503	1.5724	0.444622	3.5365	0.000405471	0.0593906	UP
TMEM170B	63.0847	-1.40242	0.397252	-3.5303	0.000415084	0.0601518	DOWN
CA12	62.0326	2.32046	0.660086	3.51539	0.000439102	0.0614146	UP
FGL2	506.058	-0.861788	0.245176	-3.51498	0.000439793	0.0614146	NOT
CCDC7	61.9739	-1.37043	0.389933	-3.51452	0.000440552	0.0614146	DOWN
MUC16	646.444	1.98387	0.564602	3.51375	0.000441831	0.0614146	UP
MTRNR2L1	85.8428	-1.41916	0.404306	-3.51012	0.000447898	0.061629	DOWN
PDCD4	335.745	-0.691063	0.197033	-3.50735	0.000452599	0.061653	NOT
PCDH1	227.113	1.41482	0.403962	3.50237	0.000461141	0.0621947	UP
GJB1	6.83517	3.47842	0.995869	3.49285	0.000477896	0.0638225	UP
RGS2	561.721	1.13648	0.326367	3.48221	0.000497292	0.065768	UP
TLCD1	5.39903	3.39393	0.977747	3.47117	0.000518193	0.0675511	UP
FLJ23867	33.7275	1.68291	0.485294	3.46782	0.000524706	0.0675511	UP
EPM2A	20.7403	-2.16772	0.625184	-3.46733	0.000525651	0.0675511	DOWN
RAB27B	94.5808	1.5615	0.450832	3.46358	0.000533028	0.067859	UP
TNFSF11	47.9366	1.65214	0.478501	3.45273	0.000554938	0.0694095	UP
DUSP7	251.133	0.829548	0.240274	3.45251	0.000555398	0.0694095	NOT
PFKP	74.6822	1.29844	0.377231	3.44204	0.000577348	0.071304	UP
GPR34	62.6418	-1.26509	0.367736	-3.44022	0.000581252	0.071304	DOWN
FGF11	23.3536	2.41092	0.702609	3.43139	0.000600506	0.071304	UP
PIP4K2B	256.227	-1.02435	0.298657	-3.42984	0.000603929	0.071304	DOWN
SERPINA5	9.71548	3.40658	0.99369	3.42821	0.000607578	0.071304	UP
VSIG2	12.2225	2.80309	0.818288	3.42556	0.000613538	0.071304	UP
PIM3	39.7449	1.56099	0.456593	3.41879	0.000629012	0.071304	UP
PPT1	540.081	-0.751211	0.219769	-3.41819	0.000630398	0.071304	NOT
ZNF211	40.1236	-1.70881	0.499967	-3.41784	0.000631196	0.071304	DOWN
MOK	9.20656	-2.37317	0.694909	-3.41507	0.000637647	0.071304	DOWN
FAM54A	8.20948	2.98077	0.872884	3.41485	0.000638171	0.071304	UP
APOL6	678.861	-0.823104	0.241142	-3.41336	0.000641679	0.071304	NOT
NDEL1	147.281	1.02635	0.300752	3.41261	0.00064344	0.071304	UP
LOC440434	27.1752	1.51413	0.443758	3.41206	0.000644749	0.071304	UP
SMAD4	447.416	-0.785479	0.23033	-3.41023	0.000649075	0.071304	NOT
PAR-SN	12.5681	-2.34056	0.686794	-3.40795	0.000654527	0.0713277	DOWN
TMEM175	14.9179	-2.01812	0.592959	-3.40347	0.000665361	0.071849	DOWN
ALDOA	533.272	0.809653	0.238053	3.40114	0.00067105	0.071849	NOT
HSPA9	455.951	0.477751	0.140536	3.39948	0.000675133	0.071849	NOT
PRKACB	417.371	-0.696975	0.20546	-3.39227	0.000693154	0.0731949	NOT
RNF43	3.16392	3.47929	1.02711	3.38746	0.00070542	0.0735136	UP
C19orf6	68.8022	1.27913	0.377674	3.38686	0.000706965	0.0735136	UP
IL8	110.514	1.81985	0.538646	3.37856	0.000728662	0.0742852	UP
ALS2CL	8.62844	2.90808	0.860944	3.37778	0.00073073	0.0742852	UP
PROM2	31.173	2.44402	0.723559	3.37778	0.000730746	0.0742852	UP
GALNT5	291.997	-1.36563	0.404627	-3.37504	0.000738046	0.0744216	DOWN
SLC38A9	38.2116	-1.38435	0.410398	-3.37319	0.000743014	0.0744216	DOWN
CCDC85A	8.79278	2.2901	0.680356	3.36603	0.000762571	0.075823	UP
OCLM	57.1249	2.68135	0.798261	3.35899	0.000782285	0.0772195	UP
SLC6A8	50.8972	1.52058	0.453009	3.35661	0.000789031	0.0773251	UP
TNFRSF10A	13.0556	2.73894	0.817501	3.35037	0.000807024	0.0773292	UP
APOBEC3F	48.2118	-1.94992	0.582198	-3.34924	0.000810334	0.0773292	DOWN
ABCC1	183.225	0.870997	0.260074	3.34903	0.000810954	0.0773292	NOT
LOC646214	92.9429	1.0515	0.313999	3.34875	0.00081178	0.0773292	UP
TPBG	321.81	0.78417	0.234355	3.34608	0.00081962	0.0775337	NOT
GBP1P1	22.2642	-1.54641	0.46268	-3.34229	0.000830898	0.0778806	DOWN
RSAD2	392.569	-1.05806	0.316688	-3.34102	0.000834721	0.0778806	DOWN
CD48	37.1285	-1.86632	0.55896	-3.33892	0.000841038	0.0779362	DOWN
CYP4F3	4.69005	3.02914	0.908515	3.33417	0.000855538	0.0787442	UP
KRT19	206.222	1.42158	0.427199	3.32768	0.000875734	0.0795236	UP
ZFAND3	190.405	0.535106	0.160892	3.32587	0.000881439	0.0795236	NOT
P4HB	711.885	0.579454	0.174228	3.32584	0.00088152	0.0795236	NOT
G6PD	18.6415	1.39412	0.420792	3.31308	0.000922747	0.0826951	UP
RASSF1	29.674	-1.82939	0.552846	-3.30904	0.000936163	0.0833069	DOWN
LOC100132724	4.98133	2.34849	0.71045	3.30564	0.000947612	0.0833069	UP
FAM167A	35.4174	2.3245	0.703213	3.30554	0.000947921	0.0833069	UP
ADH6	10.2928	2.78999	0.845832	3.29852	0.000971976	0.0848734	UP
MSLN	36.1622	2.60193	0.789785	3.29447	0.000986059	0.0855547	UP
ADD1	394.229	-0.593683	0.180428	-3.29041	0.00100042	0.0858056	NOT
FLJ31306	59.2178	0.833735	0.253495	3.28896	0.00100557	0.0858056	NOT
DTX3L	695.093	-0.609508	0.185378	-3.28792	0.00100929	0.0858056	NOT
ZNF333	27.0912	-1.47368	0.448761	-3.28389	0.00102383	0.0858056	DOWN
KIAA0825	157.151	-0.994401	0.30285	-3.28347	0.00102537	0.0858056	NOT
CLDN10	14.7128	2.52559	0.769468	3.28225	0.00102981	0.0858056	UP
SETD3	187.33	-0.841527	0.256655	-3.27882	0.0010424	0.0858056	NOT
KBTBD6	66.2124	-1.16795	0.356241	-3.27855	0.00104341	0.0858056	DOWN
HDHD1	38.9193	-1.56191	0.476685	-3.2766	0.00105064	0.0858056	DOWN
CHMP4C	19.1454	1.95199	0.595992	3.2752	0.00105589	0.0858056	UP
NHLRC2	334.682	-0.730222	0.222998	-3.27457	0.00105824	0.0858056	NOT
TSC22D4	11.721	2.22012	0.679135	3.26905	0.00107911	0.0869801	UP
CNOT6L	363.506	-0.723416	0.221443	-3.26683	0.00108758	0.0871472	NOT
MAPKAPK3	71.3347	-1.61317	0.494062	-3.26513	0.00109415	0.087157	DOWN
ABCA12	20.4508	2.42818	0.744415	3.26187	0.00110681	0.087157	UP
DSP	730.101	1.48124	0.454111	3.26184	0.0011069	0.087157	UP
PTP4A1	940.685	0.522514	0.160347	3.25864	0.00111948	0.0876413	NOT
SLC45A4	8.69091	2.11499	0.649405	3.25681	0.00112671	0.0876736	UP
RIPK4	15.9918	2.39328	0.735381	3.25448	0.001136	0.0876736	UP
CNST	223.169	-0.835444	0.256842	-3.25276	0.00114291	0.0876736	NOT
CORO2A	41.5248	1.89977	0.584396	3.25083	0.00115067	0.0876736	UP
TRIM14	194.063	-0.932501	0.287038	-3.2487	0.00115933	0.0876736	NOT
KRT18	111.692	1.07329	0.330502	3.24747	0.00116437	0.0876736	UP
LOC100507209	27.4501	1.75199	0.539756	3.2459	0.00117082	0.0876736	UP
MS4A6A	195.851	-0.84928	0.261679	-3.24551	0.00117242	0.0876736	NOT
LOC100506936	14.562	1.85768	0.572617	3.2442	0.00117782	0.0876736	UP
TCEANC	14.5762	-2.45259	0.75686	-3.24048	0.0011933	0.0883427	DOWN
LUC7L2	164.224	0.646129	0.199573	3.23755	0.0012056	0.0885387	NOT
C2	117.298	-1.25754	0.388621	-3.23589	0.00121263	0.0885387	DOWN
PLAU	391.128	0.918638	0.283948	3.23523	0.00121544	0.0885387	NOT
EDN3	10.13	-2.80499	0.869006	-3.22781	0.00124741	0.090384	DOWN
MFSD4	19.2449	1.98435	0.615577	3.22356	0.00126607	0.0912505	UP
STRN4	35.0206	1.10921	0.344408	3.22061	0.00127916	0.0916402	UP
EPB49	21.4835	2.58179	0.801967	3.21932	0.00128493	0.0916402	UP
MIPEP	34.1743	1.28863	0.400506	3.21751	0.0012931	0.0917428	UP
C9orf25	27.7318	1.55935	0.485717	3.2104	0.00132549	0.0934348	UP
SIAH1	350.039	-0.832592	0.259483	-3.20865	0.00133359	0.0934348	NOT
ENO1	355.002	0.74911	0.233756	3.20467	0.00135218	0.0934348	NOT
YAP1	469.181	0.500294	0.156233	3.20223	0.00136367	0.0934348	NOT
CXCR7	256.508	0.877932	0.274166	3.20219	0.00136388	0.0934348	NOT
SLC35F2	46.7622	1.39848	0.437159	3.19903	0.00137892	0.0934348	UP
TBP	80.5199	-1.08537	0.339379	-3.1981	0.00138334	0.0934348	DOWN
MON1A	15.1235	-1.60616	0.502316	-3.1975	0.00138622	0.0934348	DOWN
ELF3	118.154	1.91181	0.59844	3.19467	0.00139993	0.0934348	UP
IFIT1	172.913	-1.23997	0.388269	-3.19359	0.00140515	0.0934348	DOWN
ABL1	398.182	0.867123	0.271534	3.19343	0.00140596	0.0934348	NOT
SLC2A1	459.177	1.31058	0.410498	3.19266	0.00140967	0.0934348	UP
ZNF331	220.05	0.985034	0.308547	3.19249	0.0014105	0.0934348	NOT
SIK1	368.863	0.879563	0.275553	3.19199	0.00141298	0.0934348	NOT
FOSL1	36.6744	1.76953	0.555125	3.18763	0.00143446	0.0942298	UP
AKR1C1	3.74977	2.70565	0.849526	3.1849	0.00144805	0.0942298	UP
GALM	23.9258	-1.59596	0.501139	-3.18467	0.00144917	0.0942298	DOWN
ARRB2	67.1473	-1.07738	0.338566	-3.18217	0.00146176	0.0942298	DOWN
DEPDC1	9.64479	2.09647	0.65895	3.18154	0.00146495	0.0942298	UP
FAIM2	9.14828	2.96434	0.931823	3.18123	0.0014665	0.0942298	UP
DTNB	14.898	1.7081	0.537638	3.17704	0.00148785	0.0946321	UP
CSRNP3	347.094	-0.934526	0.294247	-3.176	0.00149322	0.0946321	NOT
MMP2	4224.93	0.803458	0.253017	3.17551	0.00149572	0.0946321	NOT
TACC2	75.9119	1.27463	0.401512	3.17458	0.00150055	0.0946321	UP
MIER3	179.039	-0.758725	0.239229	-3.17154	0.00151633	0.095186	NOT
CCL20	19.2257	2.17066	0.685833	3.165	0.00155085	0.0969067	UP
MEI1	16.6846	-2.51595	0.795922	-3.16105	0.00157202	0.0977812	DOWN
ADH1C	20.7261	-2.17596	0.689226	-3.15711	0.00159341	0.0984923	DOWN
EXOSC5	5.22767	2.59834	0.823227	3.15629	0.00159792	0.0984923	UP
SCEL	38.7533	2.14855	0.681829	3.15115	0.00162629	0.0992447	UP
EIF4E3	226.958	-0.606662	0.192565	-3.15043	0.00163029	0.0992447	NOT
IQGAP2	312.616	-0.840915	0.267029	-3.14915	0.00163747	0.0992447	NOT
TSPAN1	130.683	1.79454	0.569908	3.14883	0.00163926	0.0992447	UP
TYRO3	20.523	1.58246	0.503454	3.1432	0.00167109	0.10017	UP
KCNK5	7.3502	3.29769	1.04931	3.14271	0.00167393	0.10017	UP
ASNA1	88.4941	-1.50466	0.479274	-3.13945	0.00169264	0.10017	DOWN
ALDH6A1	61.5575	-1.04613	0.333243	-3.13925	0.0016938	0.10017	DOWN
FAM134B	77.1434	-1.21038	0.385613	-3.13886	0.00169607	0.10017	DOWN
CMAHP	214.341	-0.887284	0.282718	-3.13841	0.00169867	0.10017	NOT
LIPH	12.4928	2.23923	0.715053	3.13156	0.00173881	0.101808	UP
C4orf19	19.9771	2.32292	0.741881	3.13112	0.00174139	0.101808	UP
LOC646576	23.6637	-1.65806	0.530188	-3.1273	0.00176417	0.102699	DOWN
ULK1	28.1809	1.40729	0.450328	3.12504	0.00177783	0.103053	UP
CD226	23.1013	-1.562	0.500175	-3.1229	0.00179077	0.103063	DOWN
TLR4	392.807	-0.660313	0.211522	-3.12173	0.00179791	0.103063	NOT
SARS2	5.43223	2.47071	0.791572	3.12128	0.00180069	0.103063	UP
PDZK1IP1	25.4502	2.30194	0.738609	3.11659	0.00182957	0.103386	UP
SOX4	436.242	0.618135	0.198419	3.1153	0.00183757	0.103386	NOT
GAPDH	2453.84	0.652171	0.209347	3.11526	0.00183783	0.103386	NOT
C14orf105	11.9881	2.57396	0.827048	3.11222	0.00185686	0.103386	UP
RAB30	52.3131	-1.23456	0.396686	-3.11217	0.00185717	0.103386	DOWN
GPRC5C	9.40827	2.7814	0.894661	3.10888	0.00187796	0.103386	UP
ITGA4	208.123	-0.839741	0.270233	-3.10747	0.00188698	0.103386	NOT
ZHX1	359.476	-0.589799	0.189885	-3.10609	0.00189581	0.103386	NOT
KCTD12	2890.52	-0.487441	0.156932	-3.10607	0.00189589	0.103386	NOT
LOC100499467	12.5699	2.17624	0.700663	3.10597	0.00189657	0.103386	UP
GIMAP4	349.811	-0.868339	0.279735	-3.10414	0.00190831	0.103386	NOT
LEPR	293.675	-0.953551	0.307282	-3.10318	0.00191454	0.103386	NOT
COL6A1	1778.17	0.850731	0.274196	3.10263	0.00191806	0.103386	NOT
PUF60	50.1534	1.24697	0.401941	3.10236	0.00191985	0.103386	UP
KIAA0247	727.317	0.624767	0.201388	3.10231	0.00192018	0.103386	NOT
KLF5	151.064	0.964897	0.311377	3.0988	0.00194303	0.103646	NOT
CCR5	77.4055	-1.34089	0.432756	-3.09849	0.00194512	0.103646	DOWN
PBX2	171.939	0.910347	0.293843	3.09807	0.00194783	0.103646	NOT
F13A1	525.865	-0.952918	0.308177	-3.09211	0.00198737	0.105159	NOT
ZNF782	61.1286	1.12431	0.363683	3.09147	0.00199171	0.105159	UP
LOC100287049	4.05865	2.38057	0.771	3.08764	0.00201755	0.106112	UP
LOC400043	27.8477	-1.44441	0.46872	-3.08161	0.00205882	0.107866	DOWN
SCN3A	24.6857	2.48524	0.807358	3.07823	0.00208231	0.108679	UP
ETF1	398.336	0.57501	0.186988	3.07512	0.0021042	0.109402	NOT
EPT1	154.338	1.01622	0.330641	3.07348	0.00211578	0.109586	UP
TTL	279.851	0.747865	0.243817	3.06732	0.00215988	0.111446	NOT
SLC16A3	39.4767	1.22362	0.399413	3.06354	0.00218733	0.112437	UP
CDK13	334.257	0.666452	0.218036	3.05661	0.00223854	0.113742	NOT
FLNC	151.406	1.17455	0.384306	3.05629	0.00224091	0.113742	UP
DLG3	101.36	1.13697	0.372047	3.056	0.00224314	0.113742	UP
CXCL2	22.6873	1.86765	0.611222	3.0556	0.00224613	0.113742	UP
ARFIP2	46.058	1.19476	0.391159	3.05439	0.00225516	0.113777	UP
NEDD4	312.494	-0.541874	0.177915	-3.04569	0.00232149	0.114867	NOT
KCTD9	139.924	-0.508151	0.16685	-3.04555	0.00232255	0.114867	NOT
TGIF1	203.479	0.755424	0.248042	3.04555	0.00232258	0.114867	NOT
TAGLN2	229.151	0.734686	0.241322	3.04442	0.00233128	0.114867	NOT
TM6SF1	72.7273	-1.13344	0.372468	-3.04306	0.00234186	0.114867	DOWN
AP1S2	69.2022	-0.930189	0.305682	-3.04299	0.00234237	0.114867	NOT
PXDN	1407.05	0.741776	0.243839	3.04207	0.00234956	0.114867	NOT
AMT	16.144	-2.40731	0.791473	-3.04155	0.00235362	0.114867	DOWN
ZNF501	35.0988	-1.55332	0.511223	-3.03843	0.00237812	0.114867	DOWN
OSMR	1048.5	0.476584	0.156926	3.03699	0.0023895	0.114867	NOT
PSMC2	283.572	-0.638045	0.210106	-3.03678	0.00239121	0.114867	NOT
NDUFA10	126.361	0.933362	0.307373	3.03658	0.00239281	0.114867	NOT
FAIM3	65.3727	-2.05287	0.6761	-3.03634	0.00239467	0.114867	DOWN
SFRP4	5045.18	-0.904215	0.297841	-3.0359	0.00239821	0.114867	NOT
OLFM4	696.035	1.74338	0.574376	3.03526	0.00240325	0.114867	UP
TGDS	52.1931	1.1552	0.380734	3.03415	0.00241216	0.114889	UP
FN1	72408.8	0.755144	0.24938	3.02808	0.00246111	0.116109	NOT
OSGEP	27.9367	-1.41098	0.465975	-3.02802	0.00246163	0.116109	DOWN
CCDC43	32.9104	-1.15164	0.380353	-3.02781	0.00246334	0.116109	DOWN
C12orf5	50.0488	-1.09461	0.3617	-3.02629	0.00247571	0.116155	DOWN
ARHGAP10	103.663	-0.780473	0.257956	-3.02561	0.00248136	0.116155	NOT
MARK2	112.443	1.0181	0.336825	3.02263	0.00250591	0.116515	UP
PAPPA	423.856	1.08908	0.360313	3.0226	0.00250615	0.116515	UP
BTG3	77.101	0.924635	0.306161	3.0201	0.00252692	0.117081	NOT
GNL2	196.3	0.781454	0.258843	3.01903	0.0025359	0.117098	NOT
DDB1	315.157	0.630631	0.209082	3.01619	0.00255976	0.117801	NOT
FAM32A	115.312	0.82243	0.273245	3.00987	0.00261364	0.119149	NOT
CHDH	6.32036	2.64913	0.880186	3.00974	0.0026147	0.119149	UP
BRD8	99.045	1.01938	0.338701	3.00967	0.00261529	0.119149	UP
HK2	236.6	0.83308	0.276928	3.00829	0.00262719	0.119292	NOT
C9orf140	3.54408	2.9876	0.995817	3.00015	0.00269849	0.121432	UP
IL7R	225.546	-1.14021	0.380089	-2.99984	0.00270123	0.121432	DOWN
NFIL3	225.876	0.905713	0.301932	2.99973	0.00270219	0.121432	NOT
PQLC1	30.3129	-1.57387	0.524824	-2.99885	0.00270997	0.121432	DOWN
APBA2	27.4892	1.50142	0.501017	2.99674	0.00272881	0.121875	UP
PPL	45.6034	1.83297	0.612592	2.99216	0.00277015	0.123317	UP
NEAT1	752.243	0.713915	0.23875	2.99022	0.0027878	0.123698	NOT
MRPS26	15.9097	1.82045	0.609063	2.98893	0.00279959	0.123818	UP
HERC6	94.5886	-1.11536	0.373484	-2.98637	0.00282313	0.124455	DOWN
CSPP1	125.793	0.814842	0.273077	2.98393	0.00284571	0.124678	NOT
IL17RD	109.783	-1.40737	0.471726	-2.98346	0.00285013	0.124678	DOWN
CX3CL1	55.0239	1.60935	0.539654	2.98219	0.00286196	0.124678	UP
PLXNA1	216.081	0.9545	0.320363	2.97943	0.00288787	0.124678	NOT
FLRT2	638.944	-0.753396	0.252885	-2.97921	0.00288996	0.124678	NOT
ACTN1	1026.28	0.500058	0.167853	2.97913	0.00289064	0.124678	NOT
OAS1	120.043	-0.94056	0.315803	-2.97832	0.00289838	0.124678	NOT
LOC148189	17.2883	1.33913	0.449744	2.97754	0.00290576	0.124678	UP
PPAPDC3	9.48514	-2.2286	0.748597	-2.97703	0.00291057	0.124678	DOWN
LRRC8A	250.551	0.715328	0.240523	2.97405	0.00293895	0.1255	NOT
PRMT6	31.9816	-1.50491	0.506423	-2.97165	0.00296206	0.125939	DOWN
PTBP2	75.1779	0.752237	0.253188	2.97106	0.00296772	0.125939	NOT
MIER1	421.751	-0.449314	0.151281	-2.97005	0.00297751	0.125961	NOT
TBL2	86.4324	1.1386	0.383907	2.96583	0.00301866	0.126918	UP
AKR1C2	5.64578	2.50899	0.845969	2.96582	0.00301876	0.126918	UP
MIB2	3.44513	2.78819	0.941693	2.96082	0.00306819	0.128034	UP
SPOCK1	2242.79	0.718172	0.24264	2.95982	0.00307819	0.128034	NOT
ADORA3	74.5921	-1.22555	0.414081	-2.95969	0.00307948	0.128034	DOWN
SCARNA17	8.31352	1.66311	0.561986	2.95935	0.00308289	0.128034	UP
ERLIN1	348.944	0.747362	0.252799	2.95635	0.00311303	0.128893	NOT
SLC9A2	35.7272	-2.95908	1.00172	-2.95398	0.00313702	0.129232	DOWN
C12orf49	103.337	1.12771	0.381799	2.95367	0.0031402	0.129232	UP
TSPAN15	15.6787	1.66897	0.565596	2.95082	0.00316935	0.129843	UP
ADCK4	12.6241	2.16968	0.735395	2.95035	0.0031741	0.129843	UP
DDX60	244	-0.704122	0.238745	-2.94927	0.00318528	0.12991	NOT
DTX2	35.2716	1.28993	0.437758	2.94667	0.00321211	0.130239	UP
SLC2A3	530.925	0.875164	0.297004	2.94664	0.00321248	0.130239	NOT
TMEM11	23.6613	1.25527	0.426297	2.94459	0.00323384	0.130716	UP
PIP4K2A	217.041	-0.735591	0.250017	-2.94217	0.0032592	0.130893	NOT
PTGES	56.1714	1.44791	0.492167	2.94191	0.00326194	0.130893	UP
ZNF326	93.2072	0.79515	0.270331	2.94139	0.00326742	0.130893	NOT
TPI1	192.857	0.633682	0.215514	2.94033	0.00327866	0.130893	NOT
TRIB2	235.19	0.743082	0.252782	2.93961	0.00328626	0.130893	NOT
FAM26F	7.89677	-2.16048	0.736301	-2.93424	0.00334364	0.13279	DOWN
GUSB	87.6866	-0.854671	0.291595	-2.93103	0.00337845	0.133553	NOT
ERRFI1	1252.91	0.622072	0.212264	2.93066	0.00338246	0.133553	NOT
C2orf47	24.5925	1.53646	0.524538	2.92917	0.00339864	0.133804	UP
POLQ	18.3099	-1.87668	0.641982	-2.92326	0.00346383	0.135978	DOWN
HNF4G	10.4403	2.12902	0.730321	2.91518	0.00355479	0.139148	UP
UBXN10	13.5657	1.78491	0.612998	2.91176	0.00359394	0.140277	UP
NOP58	192.253	0.691961	0.237866	2.90903	0.00362547	0.141103	NOT
HTR2B	73.951	-1.0797	0.371414	-2.90701	0.00364902	0.141601	DOWN
SH3D21	6.35762	2.94226	1.01243	2.90615	0.00365905	0.141601	UP
FUBP3	132.749	0.970625	0.33411	2.9051	0.00367133	0.141674	NOT
PALM3	6.51398	3.03344	1.04507	2.90263	0.00370049	0.142396	UP
TDRD3	217.767	0.6497	0.224224	2.89756	0.00376082	0.14431	NOT
FBXO5	60.2512	1.07363	0.370693	2.89626	0.00377634	0.144498	UP
RHOJ	128.598	1.01489	0.350627	2.8945	0.00379761	0.144723	UP
GPR126	81.4796	1.29722	0.448545	2.89207	0.00382711	0.144723	UP
CD96	149.221	-1.26675	0.438049	-2.89179	0.0038305	0.144723	DOWN
LSM12	35.2163	0.812126	0.28085	2.89167	0.00383203	0.144723	NOT
COL4A2	2083.47	0.614728	0.212638	2.89096	0.00384066	0.144723	NOT
CCR2	29.7097	-1.62265	0.561751	-2.88855	0.00387022	0.144723	DOWN
KANK4	78.318	1.73217	0.599688	2.88845	0.00387151	0.144723	UP
MGA	872.162	0.361968	0.125337	2.88797	0.00387736	0.144723	NOT
EZR	533.278	0.774993	0.268495	2.88643	0.00389639	0.144723	NOT
H2AFY	387.02	0.644898	0.223444	2.88617	0.00389963	0.144723	NOT
ANKRD46	53.7308	-1.048	0.363265	-2.88496	0.00391464	0.144723	DOWN
GPI	306.397	0.651949	0.225993	2.88482	0.00391636	0.144723	NOT
TIA1	288.279	-0.450621	0.156221	-2.8845	0.00392033	0.144723	NOT
FGF13	13.4189	-2.34079	0.812403	-2.88131	0.00396021	0.1458	DOWN
REG1A	87.3734	2.57611	0.895168	2.8778	0.00400463	0.147025	UP
LOC144438	218.742	-0.895197	0.311218	-2.87643	0.00402204	0.147025	NOT
SIPA1L1	485.729	0.58573	0.203652	2.87613	0.00402588	0.147025	NOT
C9orf103	13.5856	-2.10118	0.731059	-2.87416	0.00405107	0.14755	DOWN
TMEM220	12.8164	1.47578	0.514213	2.86997	0.00410515	0.149121	UP
MGAT3	8.55276	2.36103	0.823093	2.86849	0.00412438	0.149421	UP
ZNF462	269.365	0.657042	0.229275	2.86574	0.00416032	0.149865	NOT
PITPNM1	15.2166	1.75134	0.611182	2.8655	0.00416357	0.149865	UP
RHOT2	37.2506	1.70083	0.593912	2.86378	0.00418619	0.149865	UP
RABIF	83.6865	-1.11921	0.391024	-2.86226	0.00420637	0.149865	DOWN
GPR21	5.68486	-2.53142	0.884906	-2.86067	0.00422752	0.149865	DOWN
FIZ1	21.06	-1.56651	0.547652	-2.86041	0.00423096	0.149865	DOWN
HMGA2	53.814	1.60463	0.561152	2.85952	0.00424281	0.149865	UP
TMTC4	46.7774	1.39217	0.486854	2.85952	0.00424289	0.149865	UP
FREM2	13.2825	2.33486	0.816557	2.85939	0.00424452	0.149865	UP
BAG4	206.718	-0.53048	0.185568	-2.85868	0.00425408	0.149865	NOT
FAM195B	43.6656	1.15896	0.405456	2.85841	0.00425767	0.149865	UP
IL1B	17.5181	2.66242	0.932567	2.85493	0.00430457	0.150427	UP
NCKAP1L	261.939	-0.807211	0.282787	-2.85449	0.00431066	0.150427	NOT
CD1E	37.3571	-1.9247	0.674602	-2.85309	0.00432966	0.150427	DOWN
RBP7	10.6949	-1.88006	0.659107	-2.85244	0.00433851	0.150427	DOWN
GPAM	91.7842	1.01747	0.356714	2.85235	0.00433976	0.150427	UP
TFF2	19.5573	2.32558	0.815323	2.85234	0.00433988	0.150427	UP
INPP4B	247.524	0.830608	0.29139	2.8505	0.00436507	0.150844	NOT
PIGR	77.4923	1.7426	0.611633	2.8491	0.00438435	0.150844	UP
STOML1	14.1905	1.69104	0.593546	2.84904	0.00438513	0.150844	UP
HDAC10	7.24729	2.34345	0.823835	2.84456	0.00444729	0.152597	UP
FBXL17	73.195	-0.799783	0.281271	-2.84346	0.00446266	0.152624	NOT
FMOD	791.718	0.439104	0.154456	2.8429	0.0044705	0.152624	NOT
LOXL2	506.258	0.910854	0.320558	2.84147	0.00449066	0.152871	NOT
ANKRD26	184.248	-0.799327	0.281375	-2.84079	0.00450017	0.152871	NOT
BLZF1	208.257	-0.851751	0.299945	-2.83969	0.00451577	0.15302	NOT
C14orf119	134.977	-0.610103	0.215004	-2.83763	0.00454495	0.153437	NOT
SNAPC5	6.47375	-1.66918	0.588312	-2.83723	0.00455063	0.153437	DOWN
SRRM1	687.739	0.604191	0.213054	2.83586	0.0045702	0.153717	NOT
LOC728323	9.25159	1.67892	0.592674	2.83279	0.00461435	0.154748	UP
SNRPB	34.9231	1.29518	0.457414	2.83152	0.00463279	0.154748	UP
APH1A	46.7282	1.11295	0.393126	2.83103	0.00463981	0.154748	UP
ABCA6	333.035	-0.762573	0.269405	-2.83058	0.00464631	0.154748	NOT
TRIO	788.561	0.598489	0.211593	2.82849	0.00467685	0.155385	NOT
TM7SF3	214.58	0.626287	0.221527	2.82714	0.00469659	0.155556	NOT
PITPNM3	7.48489	3.08035	1.08999	2.82604	0.00471271	0.155556	UP
TTLL1	17.8648	-1.63748	0.579474	-2.8258	0.00471623	0.155556	DOWN
WWC1	85.8381	1.17376	0.415768	2.82313	0.00475578	0.156205	UP
MARCH9	10.1721	1.86956	0.662513	2.82192	0.00477377	0.156205	UP
CCDC3	132.711	-1.05828	0.375151	-2.82094	0.00478825	0.156205	DOWN
PRICKLE3	15.2394	1.66191	0.589185	2.8207	0.00479197	0.156205	UP
SEMA4B	148.783	1.25471	0.444835	2.82061	0.00479325	0.156205	UP
SEPP1	206.086	-0.863021	0.306227	-2.81824	0.00482884	0.156536	NOT
MIEN1	39.2097	-1.30365	0.4626	-2.8181	0.00483087	0.156536	DOWN
HPS5	197.036	-0.786452	0.279118	-2.81764	0.00483787	0.156536	NOT
TRIM22	427.533	-0.654384	0.232397	-2.8158	0.00486563	0.156966	NOT
HGD	3.76727	4.18578	1.48708	2.81477	0.00488126	0.156966	UP
VPS26B	114.184	-0.760375	0.270199	-2.81413	0.00489101	0.156966	NOT
CXADR	62.6056	1.2925	0.459358	2.81371	0.00489726	0.156966	UP
HLA-DPA1	1814.22	-0.75093	0.267089	-2.81153	0.00493062	0.157664	NOT
NPAS2	170.54	0.977665	0.347896	2.81022	0.00495079	0.157837	NOT
TSPAN11	48.17	-1.75711	0.62538	-2.80967	0.00495919	0.157837	DOWN
PARP12	67.8301	-1.12265	0.399959	-2.80692	0.00500176	0.158821	DOWN
CCDC144A	26.5659	1.15601	0.411978	2.80601	0.00501591	0.158899	UP
FNDC3B	1875.17	0.344636	0.122887	2.8045	0.00503946	0.159275	NOT
MAP2	130.426	-0.932443	0.332776	-2.80201	0.00507854	0.160139	NOT
AQP9	58.0379	1.69515	0.605428	2.79992	0.00511148	0.160805	UP
CD82	16.9683	1.49254	0.533369	2.79833	0.00513674	0.161227	UP
TRAP1	61.517	1.10563	0.39522	2.79752	0.00514969	0.161262	UP
WIZ	75.4156	0.951063	0.340279	2.79495	0.00519073	0.162175	NOT
PCGF3	230.013	-0.597606	0.21424	-2.78943	0.00528014	0.163989	NOT
TWIST1	64.0597	1.31676	0.472099	2.78917	0.00528435	0.163989	UP
VPS54	169.569	-0.593948	0.212962	-2.78898	0.00528747	0.163989	NOT
HLF	103.473	-1.38391	0.496334	-2.78826	0.00529914	0.163989	DOWN
RAB11FIP5	116.085	0.943134	0.338383	2.78718	0.00531687	0.163989	NOT
KIAA1549	60.9652	1.02716	0.368564	2.78693	0.00532104	0.163989	UP
FBXL6	3.62467	2.94955	1.05893	2.7854	0.00534626	0.164394	UP
MESDC1	46.3741	1.02536	0.368449	2.7829	0.00538752	0.164937	UP
SCARF1	16.2488	1.98267	0.712455	2.78286	0.00538812	0.164937	UP
TACSTD2	200.211	1.15162	0.414003	2.78166	0.00540809	0.165177	UP
SEC16A	368.311	0.662643	0.238485	2.77855	0.00546014	0.166314	NOT
BCL6B	46.311	1.61304	0.580652	2.77798	0.00546972	0.166314	UP
PTGER4	98.1417	-0.804036	0.289627	-2.77611	0.00550133	0.166426	NOT
NLN	165.231	-0.852679	0.307175	-2.77588	0.00550527	0.166426	NOT
TOP2A	347.849	0.757464	0.273092	2.77366	0.00554293	0.166426	NOT
ARHGEF12	1764.88	0.460241	0.165978	2.7729	0.00555595	0.166426	NOT
BCO2	6.47897	-2.79536	1.00813	-2.77282	0.00555731	0.166426	DOWN
CEP68	131.319	-0.697106	0.251411	-2.77278	0.00555805	0.166426	NOT
PSORS1C1	6.46859	2.59767	0.937227	2.77166	0.00557712	0.166426	UP
THAP4	40.8931	1.24266	0.448345	2.77166	0.0055772	0.166426	UP
ZNF19	36.5606	-2.38952	0.862239	-2.7713	0.00558336	0.166426	DOWN
ARAP3	14.3329	1.52748	0.551553	2.76941	0.00561577	0.166661	UP
PIK3CD	23.166	-1.48019	0.534599	-2.76878	0.00562672	0.166661	DOWN
KIAA0556	46.8829	1.0825	0.391072	2.76804	0.00563948	0.166661	UP
GK3P	13.7818	1.7719	0.640136	2.768	0.00564018	0.166661	UP
FAM8A1	195.865	-0.554144	0.200365	-2.76567	0.00568062	0.167072	NOT
TULP4	490.338	-0.605538	0.219039	-2.76452	0.00570062	0.167072	NOT
SLC39A9	593.241	-0.511931	0.18519	-2.76436	0.00570354	0.167072	NOT
TRIM29	119.363	1.69906	0.614728	2.76393	0.00571104	0.167072	UP
CACNA1C	199.723	0.999707	0.361731	2.76368	0.00571544	0.167072	NOT
PPP1R3B	366.438	0.664637	0.240815	2.75995	0.00578095	0.168623	NOT
ASCC2	60.3243	0.936629	0.339608	2.75797	0.00581616	0.168623	NOT
TCP11L2	299.01	-0.577016	0.209328	-2.75651	0.00584211	0.168623	NOT
HIF1A	3471.21	0.493183	0.178916	2.75651	0.00584218	0.168623	NOT
ZNF439	46.3422	-1.24478	0.451611	-2.75631	0.00584578	0.168623	DOWN
ZNF780A	119.656	-0.679368	0.24649	-2.75617	0.0058483	0.168623	NOT
CENPV	8.88296	1.70423	0.618503	2.75541	0.00586192	0.168623	UP
C21orf91	133.478	-0.770424	0.279636	-2.75509	0.00586752	0.168623	NOT
LOC145820	39.4778	-1.73081	0.628397	-2.75433	0.00588125	0.168662	DOWN
PBXIP1	135.707	0.798015	0.289903	2.75269	0.0059107	0.16915	NOT
RHOH	30.725	-1.59827	0.580823	-2.75174	0.00592795	0.169288	DOWN
CDC42EP3	549.293	-0.561646	0.204226	-2.75012	0.0059574	0.169774	NOT
HLA-DRB1	851.972	-0.685345	0.249451	-2.74742	0.0060067	0.170821	NOT
GNB5	91.6411	-0.850613	0.309893	-2.74486	0.0060537	0.171799	NOT
DUSP5	108.078	0.962477	0.350925	2.74269	0.00609389	0.17258	NOT
KLHL9	240.983	-0.650486	0.237255	-2.74172	0.00611182	0.172729	NOT
COL16A1	277.409	0.777436	0.283741	2.73995	0.00614484	0.173017	NOT
LOC100653016	9.30137	1.93976	0.708351	2.73842	0.00617361	0.173017	UP
KDM4C	141.87	-0.907531	0.331425	-2.73827	0.00617634	0.173017	NOT
IGF1R	534.937	0.606751	0.221594	2.73812	0.00617911	0.173017	NOT
CASP8AP2	355.815	-0.626111	0.228693	-2.73778	0.00618554	0.173017	NOT
TMPRSS3	9.3166	2.12054	0.776177	2.73203	0.00629446	0.174976	UP
PGAM1	50.3929	0.684077	0.250508	2.73076	0.00631878	0.174976	NOT
PCTP	33.4819	-1.12412	0.411725	-2.73027	0.00632833	0.174976	DOWN
METTL1	17.3217	1.78706	0.654582	2.73008	0.00633186	0.174976	UP
SLC23A2	232.598	0.771483	0.282699	2.72899	0.00635289	0.174976	NOT
ITGAL	67.4509	-1.21611	0.445636	-2.72893	0.00635393	0.174976	DOWN
LOC100505686	20.6862	-1.64784	0.604045	-2.72801	0.00637181	0.174976	DOWN
ADO	117.544	-0.83144	0.304858	-2.7273	0.00638542	0.174976	NOT
EPHA2	36.9321	1.22719	0.449973	2.72724	0.00638659	0.174976	UP
ADAP1	4.98429	2.81299	1.03187	2.72611	0.00640857	0.174976	UP
CDC42EP2	22.1019	1.62157	0.595078	2.72498	0.00643062	0.174976	UP
MGC39372	15.2584	2.24207	0.822823	2.72485	0.00643314	0.174976	UP
LYN	189.857	-0.739392	0.271426	-2.72411	0.00644756	0.174976	NOT
ERCC4	99.8334	-0.743859	0.273096	-2.7238	0.00645352	0.174976	NOT
IGSF6	155.529	-0.909101	0.333861	-2.72299	0.00646933	0.174976	NOT
HLA-DPB1	607.749	-0.623594	0.229061	-2.72239	0.00648115	0.174976	NOT
DNAJC5	99.6637	-1.1631	0.427254	-2.72228	0.00648339	0.174976	DOWN
MDM4	432.088	0.650026	0.238795	2.7221	0.00648678	0.174976	NOT
GABRE	13.8118	2.01334	0.740231	2.71989	0.00653043	0.175805	UP
POM121C	108.797	0.681041	0.250709	2.71647	0.00659831	0.177282	NOT
KIAA0430	515.509	0.457928	0.168656	2.71516	0.00662446	0.177384	NOT
MT2A	245.684	0.772318	0.284466	2.71497	0.00662814	0.177384	NOT
LMBRD1	191.985	-0.597798	0.220397	-2.71236	0.00668053	0.178216	NOT
ID3	93.7432	0.817001	0.301241	2.71212	0.00668539	0.178216	NOT
HLA-DQA1	455.356	-0.932703	0.344045	-2.71099	0.00670821	0.178475	NOT
STK38L	271.31	0.554916	0.204757	2.71011	0.00672602	0.1786	NOT
NUP210	45.6858	-1.18105	0.436558	-2.70538	0.00682272	0.180815	DOWN
MYEOV	14.9786	2.5332	0.936647	2.70454	0.00683996	0.18092	UP
PODXL	508.703	0.592719	0.219223	2.70373	0.00685666	0.181011	NOT
PLOD1	390.245	0.575733	0.213022	2.70269	0.00687812	0.181226	NOT
ASNS	38.7023	1.17364	0.434372	2.70193	0.00689392	0.181291	UP
ITPRIP	252.198	0.925532	0.342901	2.69912	0.00695222	0.182472	NOT
ABCA8	264.922	-0.96486	0.357627	-2.69795	0.00697681	0.182766	NOT
AK4	158.574	1.06301	0.394511	2.69451	0.00704919	0.184084	UP
LOC100124692	22.5217	2.17113	0.805857	2.69419	0.00705606	0.184084	UP
USH1C	14.7041	2.06126	0.765232	2.69364	0.00706767	0.184084	UP
KIAA1804	22.4965	1.41733	0.526838	2.69027	0.00713952	0.1856	UP
SLC6A16	18.5312	-1.84644	0.687232	-2.68678	0.00721449	0.187192	DOWN
MBTD1	105.663	-0.82879	0.308618	-2.68549	0.00724227	0.187555	NOT
SLCO2B1	232.971	-0.646216	0.240694	-2.6848	0.0072574	0.187591	NOT
STX12	273.437	-0.512226	0.190875	-2.68358	0.00728392	0.18792	NOT
CEBPB	122.903	0.836814	0.311965	2.6824	0.00730968	0.188114	NOT
RND3	311.779	0.654291	0.243981	2.68173	0.00732434	0.188114	NOT
FOXK1	187.827	0.737216	0.274944	2.68134	0.00733288	0.188114	NOT
IFT46	38.1522	-1.00865	0.376334	-2.68021	0.00735764	0.188394	DOWN
ACADVL	93.9725	0.839503	0.31347	2.6781	0.00740415	0.18921	NOT
TUBA4A	51.0724	1.22663	0.458217	2.67697	0.00742923	0.18921	UP
LYZ	3209.87	-0.853693	0.318914	-2.67688	0.00743118	0.18921	NOT
CUX1	730.931	0.43196	0.161733	2.67081	0.00756675	0.192247	NOT
H1F0	411.225	0.556059	0.208273	2.66985	0.00758845	0.192247	NOT
NEMF	751.378	0.466019	0.174619	2.66877	0.00761301	0.192247	NOT
STK32A	3.93555	-2.78059	1.042	-2.66851	0.00761875	0.192247	DOWN
OSGIN2	95.7698	0.959378	0.359611	2.66782	0.00763448	0.192247	NOT
LGALSL	71.2506	-1.0753	0.403215	-2.66681	0.00765742	0.192247	DOWN
JPH1	16.9386	2.27377	0.852698	2.66656	0.00766312	0.192247	UP
LOC100506939	43.7137	-0.877801	0.329189	-2.66655	0.00766333	0.192247	NOT
CASZ1	11.7455	2.00537	0.752231	2.66589	0.00767839	0.19227	UP
DECR2	10.317	1.99811	0.749955	2.6643	0.0077148	0.19256	UP
OFD1	133.125	-0.789105	0.296222	-2.6639	0.00772413	0.19256	NOT
NACC1	51.3848	0.990229	0.371772	2.66354	0.00773235	0.19256	NOT
ALDH1A1	706.902	-0.73645	0.276592	-2.66258	0.00775431	0.192606	NOT
FAM155A	25.3333	1.38169	0.518997	2.66223	0.0077625	0.192606	UP
ZNF323	18.6129	-1.4312	0.538213	-2.65918	0.00783319	0.194007	DOWN
PC	9.80005	2.30379	0.866798	2.65782	0.00786486	0.194092	UP
ATP8B1	214.067	0.682767	0.256891	2.65781	0.00786513	0.194092	NOT
HS3ST1	37.8457	1.65213	0.622227	2.65518	0.00792656	0.195254	UP
C13orf30	13.2576	1.90093	0.716242	2.65403	0.0079537	0.195569	UP
HDGFRP3	332.962	-0.528274	0.199151	-2.65263	0.00798683	0.195722	NOT
SSR3	1220.54	-0.348191	0.131267	-2.65255	0.00798866	0.195722	NOT
SLC38A7	25.0038	1.36939	0.516402	2.65179	0.00800654	0.195764	UP
PTPRH	11.5058	2.59605	0.979221	2.65114	0.00802202	0.195764	UP
IDH1	242.895	-0.59781	0.225533	-2.65066	0.00803348	0.195764	NOT
GPR137B	158.684	-0.660102	0.249158	-2.64933	0.00806512	0.196087	NOT
CCNB2	28.1264	1.43058	0.540065	2.64889	0.00807554	0.196087	UP
ANXA5	1728.29	0.273489	0.103289	2.64781	0.00810156	0.196369	NOT
ATP2B1	390.514	-0.580275	0.219228	-2.6469	0.00812322	0.196544	NOT
WDR76	32.5058	-1.23506	0.466873	-2.64538	0.00815997	0.197083	DOWN
SPAG1	62.086	1.04077	0.393908	2.64216	0.00823793	0.197825	UP
CEP164	41.9247	0.980232	0.371091	2.64148	0.00825436	0.197825	NOT
EVI5L	4.9752	2.00254	0.758357	2.64063	0.00827526	0.197825	UP
PHKA2	50.6647	0.960536	0.363792	2.64035	0.00828211	0.197825	NOT
ERBB2	123.03	0.868127	0.328818	2.64014	0.00828708	0.197825	NOT
CXCL9	392.691	-1.51083	0.572351	-2.63969	0.00829829	0.197825	DOWN
TMCO4	12.1929	-1.80347	0.683359	-2.63913	0.00831185	0.197825	DOWN
WDSUB1	29.1497	-1.30262	0.493585	-2.63909	0.00831279	0.197825	DOWN
TRMT6	35.0437	-1.23107	0.466535	-2.63874	0.00832137	0.197825	DOWN
PCSK1N	9.33905	-1.69745	0.643622	-2.63733	0.00835606	0.198093	DOWN
PHF16	60.3918	-1.02571	0.389055	-2.63641	0.00837882	0.198093	DOWN
MICA	17.8576	1.40699	0.533721	2.63619	0.00838416	0.198093	UP
PERP	357.045	0.650405	0.246763	2.63575	0.00839517	0.198093	NOT
NIPAL2	107.919	-0.856194	0.32489	-2.63534	0.00840537	0.198093	NOT
ZNF117	258.853	0.70399	0.267239	2.63431	0.00843087	0.198351	NOT
MAPK3	166.359	0.572833	0.217567	2.6329	0.00846593	0.198833	NOT
TGFB1I1	191.807	0.889669	0.338132	2.63113	0.00851023	0.199529	NOT
PPM1F	34.4826	1.25352	0.476884	2.62856	0.0085747	0.200495	UP
KIAA0649	13.336	1.65805	0.631043	2.62748	0.00860199	0.200495	UP
PNPLA4	14.8635	-1.42618	0.542816	-2.62737	0.00860475	0.200495	DOWN
U2AF1	46.7159	0.800936	0.304908	2.62681	0.00861889	0.200495	NOT
CTDSPL	457.406	-0.644294	0.245316	-2.62638	0.00862974	0.200495	NOT
C2orf40	8.32522	-1.95425	0.744337	-2.62549	0.00865236	0.200495	DOWN
SIN3B	46.6575	0.979983	0.373269	2.62541	0.00865448	0.200495	NOT
FAM204A	191.865	-0.628789	0.239896	-2.62109	0.00876498	0.202711	NOT
GAS1	223.467	0.870672	0.332322	2.61996	0.00879394	0.202941	NOT
NEK3	26.925	1.37095	0.523353	2.61954	0.00880473	0.202941	UP
CEBPD	191.67	0.831374	0.3177	2.61686	0.00887437	0.203917	NOT
PRPF19	57.5272	0.739696	0.282677	2.61675	0.00887702	0.203917	NOT
HLA-DRA	2470.4	-0.625671	0.239259	-2.61503	0.00892188	0.204603	NOT
MST1R	11.7728	2.52194	0.964698	2.61423	0.00894298	0.204742	UP
TPRG1L	122.908	-0.68399	0.26177	-2.61294	0.00897668	0.205168	NOT
PLLP	18.2283	2.00763	0.768824	2.6113	0.00901987	0.205685	UP
GALNT7	250.509	0.68964	0.264135	2.61094	0.00902947	0.205685	NOT
ADD3	1120.22	-0.400265	0.153434	-2.60872	0.00908822	0.206445	NOT
MICALL2	16.2993	-1.56224	0.599428	-2.60621	0.0091549	0.206445	DOWN
INMT	148.383	-0.790194	0.303235	-2.60588	0.00916398	0.206445	NOT
DOK5	59.9874	-1.2226	0.469232	-2.60554	0.00917297	0.206445	DOWN
MRPL27	32.6154	1.41884	0.544602	2.60529	0.00917972	0.206445	UP
TMEM184B	183.147	0.724667	0.278191	2.60493	0.00918928	0.206445	NOT
FOXQ1	55.8773	1.23928	0.47581	2.60457	0.00919904	0.206445	UP
RAB1A	1159.2	0.376321	0.144511	2.6041	0.00921172	0.206445	NOT
EPPK1	22.9204	1.89457	0.72756	2.604	0.00921417	0.206445	UP
HLA-DQB1	283.847	-0.884394	0.33963	-2.604	0.0092144	0.206445	NOT
NLRC3	34.9749	-1.25396	0.481945	-2.60187	0.00927181	0.20739	DOWN
SETMAR	32.06	-1.17292	0.450955	-2.60098	0.00929591	0.207588	DOWN
DHX58	9.6737	-1.80755	0.695756	-2.59796	0.00937789	0.208779	DOWN
GATA2	19.5199	1.83013	0.704466	2.59789	0.00937987	0.208779	UP
IFT88	49.6906	0.805973	0.31045	2.59614	0.00942768	0.209125	NOT
ZNF540	6.31359	2.03965	0.785696	2.59598	0.00943215	0.209125	UP
FAM133A	8.07965	-1.92271	0.741243	-2.5939	0.0094894	0.209125	DOWN
ZNF776	147.669	-0.952065	0.367057	-2.59378	0.00949279	0.209125	NOT
FAM82A2	54.8645	-0.983127	0.379043	-2.59371	0.00949469	0.209125	NOT
LETM2	18.3885	1.52027	0.586325	2.59288	0.00951748	0.209125	UP
F8	65.8524	-0.974	0.37566	-2.59277	0.00952053	0.209125	NOT
ERO1L	356.231	0.627034	0.241883	2.59231	0.00953348	0.209125	NOT
CLINT1	812.977	0.436106	0.168243	2.59212	0.00953879	0.209125	NOT
PTPRCAP	12.4127	-2.00636	0.774135	-2.59175	0.00954897	0.209125	DOWN
DKK1	31.3078	1.57446	0.6078	2.59043	0.00958552	0.209589	UP
GRIPAP1	39.5573	0.933258	0.360365	2.58976	0.00960439	0.209665	NOT
BMF	134.114	0.851313	0.328889	2.58845	0.00964095	0.210126	NOT
GYPC	23.6291	-1.00177	0.387299	-2.58654	0.00969442	0.210954	DOWN
SNX4	192.961	-0.551567	0.213375	-2.58496	0.00973903	0.211587	NOT
OSBPL8	1581.17	-0.401908	0.155528	-2.58416	0.00976179	0.211744	NOT
CSDA	414.121	0.538615	0.208535	2.58285	0.00979884	0.212209	NOT
COL6A3	15737.9	0.503809	0.1953	2.57967	0.00988951	0.213833	NOT
MOXD1	1146.13	-0.580056	0.224936	-2.57876	0.00991546	0.214054	NOT
QPCTL	4.91773	2.96972	1.15218	2.57748	0.00995248	0.214312	UP
GMNN	7.98305	1.55834	0.604867	2.57634	0.00998529	0.214312	UP
NR2C2	349.09	0.630097	0.244583	2.57621	0.00998895	0.214312	NOT
ERAP1	520.53	-0.407883	0.158366	-2.57556	0.0100077	0.214312	NOT
SERPINE1	1464.43	0.767751	0.298108	2.57541	0.0100121	0.214312	NOT
ARHGEF37	36.4746	1.57007	0.609717	2.57508	0.0100218	0.214312	UP
HSP90AA1	4145.43	0.370059	0.143814	2.57317	0.0100771	0.215158	NOT
DOT1L	13.971	1.56876	0.609954	2.57193	0.0101133	0.215593	UP
ABHD16A	20.6551	1.25636	0.488904	2.56974	0.0101775	0.216397	UP
SULT1A1	13.7769	-1.22893	0.478264	-2.56956	0.0101828	0.216397	DOWN
KCNQ1	11.8188	1.77348	0.690423	2.56868	0.0102086	0.216607	UP
MAP3K6	27.7394	1.21533	0.473484	2.56679	0.0102645	0.217282	UP
MCU	217.454	0.687703	0.267951	2.56652	0.0102723	0.217282	NOT
RPL9	82.9931	-0.702506	0.273859	-2.56521	0.0103113	0.217712	NOT
FGD3	12.8188	-1.52542	0.594906	-2.56414	0.0103431	0.217712	DOWN
FAM96A	63.2335	-0.9023	0.351923	-2.56391	0.01035	0.217712	NOT
LIMD2	20.2824	-1.46272	0.570661	-2.56319	0.0103714	0.217712	DOWN
CUEDC1	8.7688	1.55573	0.606966	2.56312	0.0103736	0.217712	UP
MED29	147.495	0.673422	0.262786	2.56262	0.0103886	0.217712	NOT
ST3GAL4	68.3171	-0.857185	0.334722	-2.56089	0.0104406	0.218149	NOT
SEZ6L2	18.6781	1.50945	0.589431	2.56086	0.0104414	0.218149	UP
ACTG1	4595.96	0.316542	0.123648	2.56002	0.0104665	0.218337	NOT
CCDC132	150.783	-0.646612	0.252687	-2.55894	0.0104992	0.218686	NOT
NID1	1790.41	0.419661	0.164124	2.55698	0.0105585	0.219332	NOT
AQP3	51.2514	1.36137	0.532441	2.55685	0.0105624	0.219332	UP
MAP7	50.2874	1.07061	0.419026	2.555	0.0106188	0.220167	UP
TUBG2	12.9847	1.33873	0.52411	2.55429	0.0106404	0.220279	UP
SREBF1	45.507	-1.16199	0.455133	-2.55309	0.0106772	0.220705	DOWN
TCF21	65.091	0.921586	0.361158	2.55175	0.0107182	0.221057	NOT
RRN3P2	7.36761	1.71971	0.674012	2.55145	0.0107276	0.221057	UP
BCL2	150.573	-0.826103	0.323841	-2.55095	0.0107429	0.221057	NOT
LOC285074	7.55819	-1.3965	0.547698	-2.54976	0.0107796	0.221478	DOWN
ATP5S	18.2373	-1.39724	0.548162	-2.54895	0.0108047	0.221522	DOWN
KRT6A	83.7682	2.12001	0.831818	2.54864	0.0108143	0.221522	UP
SLAMF6	66.493	-1.23699	0.485781	-2.54639	0.0108844	0.222141	DOWN
CNTRL	227.26	-0.655629	0.257487	-2.54626	0.0108883	0.222141	NOT
CNPY2	97.4125	0.839997	0.329915	2.5461	0.0108934	0.222141	NOT
RUVBL1	53.7513	1.16873	0.459253	2.54486	0.0109322	0.222566	UP
LOC100506486	26.6059	1.50411	0.591147	2.54439	0.0109469	0.222566	UP
PARD3	186.712	0.584164	0.229675	2.54344	0.0109768	0.222841	NOT
DLEU7	5.75978	2.25455	0.887057	2.54161	0.0110343	0.223675	UP
CCDC15	15.5481	1.43896	0.566706	2.53916	0.0111118	0.224648	UP
GPBAR1	34.8344	-1.67179	0.658431	-2.53905	0.0111153	0.224648	DOWN
APBA3	5.35077	2.04337	0.80514	2.53791	0.0111516	0.22495	UP
BRF1	15.1225	1.62552	0.640589	2.53755	0.0111633	0.22495	UP
CWC22	220.865	-0.566589	0.223339	-2.5369	0.011184	0.224954	NOT
PLCB3	40.5119	1.05104	0.414366	2.5365	0.0111965	0.224954	UP
KCTD13	49.3994	-1.39472	0.550421	-2.53392	0.0112794	0.22558	DOWN
CDAN1	16.9109	1.78328	0.703857	2.53358	0.0112903	0.22558	UP
MUC13	140.537	1.62504	0.641486	2.53325	0.0113011	0.22558	UP
PET112	13.2672	-1.5709	0.620171	-2.53301	0.0113088	0.22558	DOWN
RAP1GDS1	163.109	-0.649559	0.256443	-2.53296	0.0113105	0.22558	NOT
LOC100506696	4.2556	2.1377	0.844222	2.53215	0.0113364	0.225726	UP
HNRNPD	451.62	0.428566	0.169279	2.53171	0.0113509	0.225726	NOT
TM4SF1	385.41	0.867489	0.342844	2.53027	0.0113974	0.22632	NOT
KIAA0513	30.6953	-1.37804	0.54499	-2.52856	0.0114533	0.226848	DOWN
KIAA0947	438.045	-0.42381	0.167618	-2.52843	0.0114573	0.226848	NOT
GTPBP2	126.326	1.04961	0.415243	2.52769	0.0114816	0.227	UP
RFTN2	185.723	-0.681338	0.269637	-2.52687	0.0115084	0.227199	NOT
PNISR	719.113	0.497927	0.197113	2.52611	0.0115335	0.227299	NOT
RNF185	87.2276	0.805445	0.3189	2.5257	0.0115468	0.227299	NOT
IL7	25.359	1.22646	0.485744	2.52491	0.0115728	0.22738	UP
SPDYE3	9.51295	1.53873	0.609682	2.52382	0.0116089	0.22738	UP
POLK	524.211	-0.474034	0.187867	-2.52324	0.011628	0.22738	NOT
MLL4	29.8101	1.2191	0.483187	2.52303	0.0116348	0.22738	UP
KLHDC10	364.988	-0.488815	0.193786	-2.52245	0.0116542	0.22738	NOT
ZDHHC12	32.9849	1.5406	0.610845	2.52207	0.0116665	0.22738	UP
SAAL1	44.5262	1.01877	0.403948	2.52204	0.0116678	0.22738	UP
CTNS	42.2027	-1.1856	0.470244	-2.52125	0.0116938	0.227562	DOWN
PTPN4	112.963	-0.615643	0.244422	-2.51877	0.0117765	0.228844	NOT
ANXA2P1	12.4202	0.89312	0.35476	2.51753	0.0118181	0.229063	NOT
AKAP7	25.6321	-1.15397	0.45839	-2.51743	0.0118214	0.229063	DOWN
P2RY13	77.8292	-1.03346	0.410671	-2.51652	0.0118519	0.229327	DOWN
FJX1	32.7187	1.13119	0.450006	2.51373	0.0119461	0.230361	UP
PFKFB3	273.225	0.702147	0.279358	2.51343	0.0119563	0.230361	NOT
ITGA5	419.79	0.718129	0.285758	2.51307	0.0119685	0.230361	NOT
KIAA1217	1822.88	0.481467	0.191595	2.51294	0.0119729	0.230361	NOT
MX1	195.835	-0.784783	0.312373	-2.51232	0.0119939	0.230438	NOT
AP1S3	23.6226	1.32784	0.528843	2.51085	0.0120442	0.231079	UP
NDUFS1	176.29	-0.57335	0.228452	-2.50972	0.0120827	0.231492	NOT
SPRED1	608.069	-0.382588	0.152476	-2.50917	0.0121014	0.231524	NOT
TNFRSF9	9.32	-2.31306	0.922085	-2.50851	0.012124	0.231632	DOWN
RNF5	71.0488	0.711712	0.283786	2.50792	0.0121445	0.231698	NOT
GNL1	56.4114	-1.04971	0.41871	-2.507	0.0121759	0.231973	DOWN
NANOS1	21.4325	-1.44481	0.576446	-2.50642	0.0121962	0.232035	DOWN
ADAMTSL3	195.496	-1.03325	0.41242	-2.50533	0.0122336	0.232422	DOWN
KSR1	39.182	1.12175	0.447924	2.50432	0.0122687	0.232667	UP
NOTCH3	761.673	0.457885	0.182883	2.50371	0.01229	0.232667	NOT
BCL9L	265.164	0.727301	0.290516	2.50348	0.0122978	0.232667	NOT
KIAA1432	255.137	0.593374	0.237296	2.50056	0.0123996	0.23423	NOT
WDR11	204.672	-0.571881	0.22883	-2.49915	0.0124492	0.23423	NOT
PPP1R14B	14.2966	1.11145	0.444783	2.49886	0.0124595	0.23423	UP
LOC100505519	19.7233	-1.16084	0.464575	-2.49872	0.0124643	0.23423	DOWN
PTOV1	55.3406	0.766018	0.306572	2.49866	0.0124663	0.23423	NOT
MYO9B	229.397	0.626316	0.250739	2.49788	0.0124939	0.234424	NOT
DYSF	58.2292	1.07293	0.429643	2.49727	0.0125154	0.234505	UP
NEK6	194.51	0.703616	0.281851	2.49641	0.0125458	0.234752	NOT
ELL	44.0524	1.08141	0.433466	2.4948	0.012603	0.235198	UP
SWT1	69.5207	0.863691	0.346232	2.49454	0.012612	0.235198	NOT
CSNK1D	134.152	0.624858	0.250555	2.49389	0.012635	0.235198	NOT
LCOR	351.871	-0.593072	0.237819	-2.49379	0.0126387	0.235198	NOT
GTF2IRD1	27.6951	1.10487	0.443264	2.49258	0.0126818	0.235677	UP
ANGPTL2	787.011	0.612186	0.245662	2.49199	0.0127031	0.235751	NOT
FKBP11	55.864	-1.05911	0.425139	-2.4912	0.0127311	0.23595	DOWN
GIMAP1	34.8325	-1.32013	0.530194	-2.48991	0.0127777	0.236492	DOWN
RCHY1	51.7791	-0.864322	0.347336	-2.48843	0.0128307	0.237151	NOT
DNAJA4	57.7947	1.20463	0.484242	2.48767	0.0128584	0.237341	UP
TEX9	29.6596	-1.09058	0.438679	-2.48605	0.0129171	0.238102	DOWN
SPRYD7	55.2537	0.964625	0.388269	2.48443	0.012976	0.238864	NOT
COL4A1	5336.1	0.424735	0.17106	2.48296	0.0130297	0.239273	NOT
PRUNE2	164.409	-0.766202	0.308597	-2.48286	0.0130334	0.239273	NOT
LIN7C	437.411	-0.436219	0.175738	-2.48222	0.0130568	0.239381	NOT
BAD	13.7607	1.49362	0.601885	2.48157	0.0130804	0.239492	UP
DOK2	7.25641	-1.79384	0.723046	-2.48095	0.0131031	0.239585	DOWN
LOC100129794	5.10653	-2.30523	0.929365	-2.48044	0.0131221	0.239611	DOWN
DNAJC25	23.661	0.744538	0.30031	2.47923	0.0131667	0.239892	NOT
GK	73.9864	0.765115	0.30863	2.47906	0.0131727	0.239892	NOT
KIF1B	531.187	-0.56818	0.22928	-2.4781	0.0132084	0.24022	NOT
SLC38A11	13.469	-1.96121	0.791638	-2.47741	0.0132341	0.240366	DOWN
DCHS2	81.557	1.13931	0.460067	2.47639	0.0132718	0.24073	UP
BRD4	444.246	0.560478	0.226489	2.47464	0.013337	0.241478	NOT
KIAA1147	134.271	0.794214	0.320981	2.47433	0.0133485	0.241478	NOT
FLNB	946.865	0.439959	0.177884	2.47329	0.0133875	0.241862	NOT
PPP1R15A	88.0823	0.791325	0.320154	2.4717	0.013447	0.242617	NOT
SLC40A1	585.819	-0.675474	0.273468	-2.47003	0.0135103	0.243226	NOT
GRAMD1C	13.0712	1.76219	0.713478	2.46986	0.0135165	0.243226	UP
AUTS2	181.1	0.710849	0.288015	2.4681	0.0135832	0.244104	NOT
NUP93	96.7984	0.962328	0.39059	2.46378	0.0137479	0.246738	NOT
KIF18A	23.3265	1.31833	0.535333	2.46263	0.0137922	0.247207	UP
ENG	1002.29	-0.664899	0.270259	-2.46023	0.013885	0.247817	NOT
ALDH3B1	41.9937	1.06385	0.432566	2.45939	0.0139174	0.247817	UP
IER3IP1	56.3501	0.765308	0.311214	2.4591	0.0139285	0.247817	NOT
MME	162.887	1.38878	0.564762	2.45905	0.0139306	0.247817	UP
PITHD1	31.6913	1.22053	0.496514	2.4582	0.0139636	0.247817	UP
SLC5A6	33.8532	1.51477	0.616276	2.45795	0.0139734	0.247817	UP
DHCR24	50.9874	1.23603	0.502965	2.45748	0.0139914	0.247817	UP
PIEZO2	242.611	-0.695002	0.282867	-2.45699	0.0140106	0.247817	NOT
ZFPL1	23.0534	-1.06177	0.432173	-2.45682	0.0140171	0.247817	DOWN
LOC100506606	3.72243	2.2722	0.924924	2.45663	0.0140246	0.247817	UP
FAM169A	25.7127	-1.30225	0.530105	-2.45659	0.0140263	0.247817	DOWN
SLC35A2	55.6127	-1.18013	0.480617	-2.45545	0.0140707	0.248128	DOWN
FAM101B	123.096	0.926208	0.377243	2.45521	0.0140804	0.248128	NOT
STS	210.846	0.611207	0.249003	2.45462	0.0141033	0.24821	NOT
ANGPTL4	6.35595	1.72639	0.703679	2.45338	0.0141519	0.248645	UP
PCBD2	13.7081	-1.58089	0.644486	-2.45294	0.0141694	0.248645	DOWN
S100A14	58.2814	1.61999	0.660887	2.45124	0.0142367	0.248645	UP
DDX58	375.149	-0.564634	0.230372	-2.45096	0.0142475	0.248645	NOT
C15orf39	138.922	0.832326	0.339598	2.45091	0.0142495	0.248645	NOT
PCDHB14	96.2099	-1.1119	0.453679	-2.45086	0.0142516	0.248645	DOWN
ZNF397	39.0104	-1.17807	0.480696	-2.45075	0.0142557	0.248645	DOWN
TFAM	74.0226	-0.806202	0.329041	-2.45016	0.0142794	0.248739	NOT
FRMD4A	144.358	-0.650261	0.265618	-2.44811	0.0143608	0.249671	NOT
MLH1	201.045	0.66245	0.270621	2.44789	0.0143695	0.249671	NOT
ADAM19	270.905	0.657309	0.268654	2.44667	0.0144182	0.249893	NOT
MORC3	337.59	-0.618077	0.252621	-2.44665	0.014419	0.249893	NOT
ZXDC	263.491	0.578246	0.23644	2.44563	0.0144597	0.250087	NOT
BUD31	33.0888	1.01305	0.414256	2.44546	0.0144669	0.250087	UP
MRGPRF	20.4756	1.2557	0.513586	2.44496	0.0144869	0.250114	UP
CMTM8	5.83574	1.51084	0.618088	2.44437	0.0145104	0.250203	UP
MYO1G	21.8117	-1.63056	0.667276	-2.44361	0.0145413	0.25042	DOWN
MALAT1	13792.2	0.493987	0.202206	2.44299	0.014566	0.250528	NOT
MAML3	187.567	0.618489	0.253323	2.4415	0.0146264	0.25125	NOT
SRD5A3	177.6	1.01727	0.416823	2.44053	0.0146657	0.251526	UP
SH3PXD2B	732.887	0.544654	0.223226	2.43992	0.0146905	0.251526	NOT
EBLN2	42.3024	-1.22827	0.503474	-2.4396	0.0147037	0.251526	DOWN
TXNIP	2365.79	-0.485328	0.198993	-2.43892	0.0147311	0.251526	NOT
FLJ38109	25.7724	1.31594	0.539645	2.43853	0.0147473	0.251526	UP
ROS1	11.1796	2.55251	1.04682	2.43834	0.0147547	0.251526	UP
PPP4R1L	12.9439	1.49434	0.61299	2.4378	0.0147771	0.251526	UP
CENPQ	11.5808	1.23127	0.505208	2.43715	0.0148035	0.251526	UP
ATP13A3	1055.13	0.381242	0.156503	2.43601	0.0148504	0.251526	NOT
FCGR3B	64.4988	1.14358	0.469453	2.43598	0.0148516	0.251526	UP
C4orf10	35.2664	1.36205	0.559146	2.43595	0.0148529	0.251526	UP
HEY1	22.7993	1.39213	0.57156	2.43567	0.0148641	0.251526	UP
DAAM2	115.355	-0.845649	0.347264	-2.43517	0.0148847	0.251562	NOT
PLAT	997.326	0.505766	0.207772	2.43423	0.0149234	0.251904	NOT
LIPG	65.0181	1.15006	0.472965	2.4316	0.0150324	0.253342	UP
SLC7A11	45.217	1.18136	0.485899	2.43128	0.0150458	0.253342	UP
TNFAIP2	98.9593	1.05175	0.432859	2.42978	0.0151082	0.253518	UP
GPSM3	32.8391	-1.0161	0.418201	-2.42969	0.0151119	0.253518	DOWN
HUWE1	1342.88	0.348171	0.143299	2.42968	0.0151121	0.253518	NOT
PDE2A	15.1182	-1.9772	0.81424	-2.42828	0.0151706	0.253991	DOWN
FAM55C	120.408	-0.754128	0.310629	-2.42774	0.0151931	0.253991	NOT
COL18A1	111.935	0.763889	0.314659	2.42767	0.0151962	0.253991	NOT
LUC7L3	482.599	0.457756	0.188697	2.42588	0.0152715	0.254937	NOT
GJB3	15.9569	1.81005	0.746453	2.42487	0.0153138	0.25533	UP
DAZAP1	22.2687	1.00526	0.414802	2.42347	0.0153728	0.256001	UP
LOC100506156	228.537	-0.67822	0.280175	-2.4207	0.0154905	0.257335	NOT
SLC35A5	132.053	-0.637275	0.263261	-2.4207	0.0154907	0.257335	NOT
EPCAM	322.787	1.16007	0.479517	2.41925	0.0155527	0.25805	UP
CDC40	96.4279	-0.578894	0.239464	-2.41746	0.0156294	0.258354	NOT
CWF19L2	265.061	-0.541763	0.224128	-2.41721	0.0156401	0.258354	NOT
IFT20	55.9773	-0.909625	0.37637	-2.41684	0.0156561	0.258354	NOT
TMEM53	25.3838	1.33072	0.550632	2.41672	0.0156609	0.258354	UP
PRR14L	473.24	0.411035	0.170093	2.41653	0.0156694	0.258354	NOT
NUP155	151.7	0.726183	0.300552	2.41617	0.0156848	0.258354	NOT
IL22RA1	4.35103	2.64995	1.09826	2.41286	0.0158277	0.260393	UP
CCT6A	363.284	0.539278	0.223773	2.40994	0.0159553	0.26165	NOT
MTHFD1	100.688	0.550324	0.228361	2.40988	0.0159577	0.26165	NOT
PHLPP2	98.445	0.921896	0.382574	2.40972	0.0159649	0.26165	NOT
SLC25A23	75.479	0.812375	0.337176	2.40935	0.015981	0.26165	NOT
SNAI2	654.962	-0.536575	0.22275	-2.40887	0.0160019	0.261678	NOT
EXOC3	53.1774	-0.847786	0.352213	-2.40703	0.0160831	0.26269	NOT
PFDN2	38.744	0.794284	0.330314	2.40464	0.0161886	0.263991	NOT
SLC35F1	15.1943	1.55072	0.644978	2.4043	0.0162035	0.263991	UP
CAMK1G	15.032	2.21683	0.922178	2.40391	0.0162208	0.263991	UP
NAMPT	766.03	0.582089	0.242442	2.40094	0.0163528	0.265559	NOT
KIAA1467	51.0755	-1.27853	0.532527	-2.40087	0.0163563	0.265559	DOWN
SLC26A9	20.6361	1.85591	0.773155	2.40043	0.0163757	0.265559	UP
UBE2MP1	3.33568	1.59235	0.663589	2.3996	0.0164129	0.265846	UP
KLK10	119.288	1.49637	0.624146	2.39747	0.0165089	0.267084	UP
RBM12B	228.428	0.548513	0.229058	2.39465	0.0166364	0.26856	NOT
CTSS	809.385	-0.518767	0.216693	-2.39402	0.0166649	0.26856	NOT
SPDYE5	9.72056	1.01757	0.425081	2.39382	0.0166738	0.26856	UP
ERGIC1	206.84	0.515084	0.215187	2.39366	0.0166812	0.26856	NOT
DPEP1	50.0494	-1.13255	0.473221	-2.39327	0.0166987	0.26856	DOWN
CAMKMT	14.4414	-1.74398	0.72902	-2.39223	0.0167465	0.268847	DOWN
RRP36	17.5541	1.08411	0.45348	2.39065	0.0168188	0.268847	UP
APP	3194.15	0.313588	0.131185	2.39043	0.0168285	0.268847	NOT
PAQR8	110.122	-0.683738	0.286035	-2.3904	0.0168301	0.268847	NOT
HYMAI	16.1607	1.31677	0.55094	2.39004	0.0168468	0.268847	UP
STAT2	558.928	-0.365606	0.15298	-2.38989	0.0168533	0.268847	NOT
DENND2C	28.7148	1.33571	0.558905	2.38986	0.0168548	0.268847	UP
PLS1	79.2594	1.03651	0.433924	2.38869	0.0169085	0.26938	UP
RCE1	12.1388	2.4264	1.01612	2.38791	0.0169445	0.26938	UP
ZNF319	21.9879	1.46344	0.612872	2.38785	0.0169475	0.26938	UP
SLPI	35.7377	1.25743	0.526697	2.3874	0.0169682	0.269394	UP
GFRA1	118.8	-1.17953	0.494432	-2.38562	0.0170505	0.270173	DOWN
PUS7L	79.2602	-0.68582	0.28752	-2.38529	0.0170656	0.270173	NOT
RAPGEF6	277.323	-0.463202	0.19421	-2.38505	0.0170767	0.270173	NOT
ZNF638-IT1	64.2043	0.995503	0.41769	2.38335	0.0171558	0.270395	NOT
PGCP	355.115	-0.475355	0.199461	-2.3832	0.0171631	0.270395	NOT
COL15A1	1836.57	0.566704	0.237807	2.38304	0.0171702	0.270395	NOT
CDH2	163.784	0.880344	0.369475	2.38269	0.0171866	0.270395	NOT
CYBB	742.403	-0.583313	0.24482	-2.38262	0.01719	0.270395	NOT
CREB3	84.3644	0.953407	0.400453	2.38082	0.0172742	0.270909	NOT
C3orf67	24.8317	-1.86137	0.781844	-2.38074	0.017278	0.270909	DOWN
CAP2	105.251	-0.842375	0.353897	-2.38029	0.0172992	0.270909	NOT
GTF2F1	114.01	0.871084	0.365989	2.38008	0.0173088	0.270909	NOT
HIPK3	1123.71	-0.361589	0.151941	-2.3798	0.0173221	0.270909	NOT
ADAM8	22.3743	1.28695	0.541134	2.37826	0.0173948	0.271591	UP
RGS18	50.787	-1.08615	0.456743	-2.37803	0.0174056	0.271591	DOWN
MGP	1859.65	-0.671772	0.282566	-2.3774	0.0174352	0.271742	NOT
HSD17B11	158.04	0.58972	0.248202	2.37597	0.017503	0.272236	NOT
SRSF3	448.083	-0.496024	0.208775	-2.37589	0.0175069	0.272236	NOT
NADKD1	143.859	-0.570562	0.240353	-2.37385	0.0176036	0.273428	NOT
SLC25A25	45.6137	1.02441	0.431966	2.3715	0.0177158	0.274858	UP
PTPLAD2	88.287	-0.70987	0.299413	-2.37087	0.0177462	0.275016	NOT
ZMAT3	715.221	-0.407929	0.172142	-2.36972	0.0178018	0.275563	NOT
MAEA	56.5276	-0.802811	0.338902	-2.36886	0.0178431	0.275738	NOT
NOTCH1	162.761	0.735429	0.310486	2.36864	0.0178535	0.275738	NOT
SKAP1	19.3266	-1.46778	0.620179	-2.36671	0.0179472	0.276732	DOWN
XRCC3	4.41375	1.98023	0.836957	2.36599	0.017982	0.276732	UP
ELOVL7	8.06136	1.61607	0.683217	2.36538	0.0180116	0.276732	UP
LYVE1	27.9849	1.36871	0.578747	2.36496	0.0180321	0.276732	UP
MCAM	105.101	0.854135	0.361212	2.36464	0.0180478	0.276732	NOT
COL6A2	1038.84	0.522181	0.220877	2.36413	0.0180727	0.276732	NOT
EIF2AK2	473.627	-0.37875	0.16021	-2.36409	0.0180746	0.276732	NOT
NUDCD1	64.5554	-0.847569	0.358537	-2.36397	0.0180804	0.276732	NOT
CHFR	47.5737	1.01489	0.429588	2.36246	0.018154	0.277448	UP
TMEM158	89.4334	0.911045	0.385761	2.36169	0.0181921	0.277448	NOT
DLG5	176.314	0.657942	0.278596	2.36164	0.0181945	0.277448	NOT
SLC7A6OS	11.3991	-1.76042	0.745516	-2.36135	0.0182087	0.277448	DOWN
LOC100506373	10.8062	2.20524	0.934123	2.36075	0.0182378	0.277568	UP
DVL1	20.3009	1.26871	0.53768	2.3596	0.0182949	0.277568	UP
ZNF473	29.0414	1.09811	0.46539	2.35954	0.0182976	0.277568	UP
ANXA9	3.97105	2.64463	1.12083	2.35953	0.018298	0.277568	UP
TRUB1	102.497	-0.673971	0.285751	-2.35859	0.0183444	0.277961	NOT
TMEM45A	116.198	0.775297	0.328845	2.35764	0.0183917	0.278368	NOT
SH3YL1	71.1621	0.863023	0.366161	2.35695	0.0184257	0.278574	NOT
SASH3	80.5229	-0.967328	0.410512	-2.3564	0.0184533	0.278615	NOT
ECI2	47.3558	0.790458	0.335579	2.35551	0.0184975	0.278615	NOT
ITGB7	14.0654	-1.38251	0.586992	-2.35525	0.0185101	0.278615	DOWN
LAMB1	2984.08	0.338303	0.143665	2.35481	0.0185321	0.278615	NOT
MTERFD3	15.6852	1.40348	0.596094	2.35445	0.0185499	0.278615	UP
CIITA	63.0615	-0.887162	0.376806	-2.35443	0.0185512	0.278615	NOT
TAF5L	86.173	0.801779	0.340617	2.3539	0.0185774	0.278702	NOT
C7orf43	20.1479	-1.40029	0.595361	-2.35199	0.0186731	0.279829	DOWN
TET2	885.85	0.382075	0.162497	2.35128	0.0187091	0.28006	NOT
TMEM41A	236.729	0.811738	0.345354	2.35045	0.0187505	0.280065	NOT
NUBP2	8.9632	1.30243	0.554117	2.35045	0.0187505	0.280065	UP
TMPRSS4	67.2718	1.57066	0.668904	2.34811	0.018869	0.281372	UP
LDLR	180.146	0.851402	0.362622	2.34791	0.0188793	0.281372	NOT
MUC1	123.109	1.22791	0.52321	2.34687	0.0189318	0.281846	UP
LOC339524	142.532	-0.961788	0.409898	-2.34641	0.0189554	0.281889	NOT
CELSR1	53.8587	0.978863	0.417391	2.34519	0.0190173	0.28225	NOT
CASC4	2270.54	-0.278948	0.118949	-2.34511	0.0190214	0.28225	NOT
DDX19B	42.1019	-0.717656	0.306097	-2.34453	0.0190509	0.28225	NOT
C5orf43	136.14	-0.530982	0.226531	-2.34397	0.0190796	0.28225	NOT
LSG1	73.9495	0.7193	0.306887	2.34386	0.0190852	0.28225	NOT
MFN1	165.472	0.63062	0.269094	2.3435	0.019104	0.28225	NOT
ZNF213	26.5308	1.17654	0.502241	2.34258	0.0191507	0.282499	UP
TSPYL4	365.914	-0.648791	0.277017	-2.34206	0.0191776	0.282499	NOT
ANKRD44	170.895	-0.650615	0.277809	-2.34195	0.019183	0.282499	NOT
RBM42	31.4625	1.00718	0.430455	2.33981	0.0192935	0.282679	UP
RHOBTB2	91.3839	0.897047	0.383388	2.33979	0.0192945	0.282679	NOT
NUMA1	448.369	0.617005	0.263721	2.33961	0.0193038	0.282679	NOT
SAT1	607.937	0.533594	0.22809	2.3394	0.0193147	0.282679	NOT
SEMA3E	12.1984	1.86507	0.797271	2.33931	0.0193192	0.282679	UP
PJA2	1292.02	-0.279736	0.119581	-2.3393	0.0193198	0.282679	NOT
MBNL3	280.627	-0.52942	0.22664	-2.33595	0.0194938	0.284663	NOT
CD27	10.9021	-1.70376	0.729385	-2.33589	0.0194971	0.284663	DOWN
ATP6V0A1	295.752	0.512532	0.219518	2.33481	0.0195535	0.285179	NOT
NFS1	28.5393	1.17982	0.505418	2.33435	0.0195776	0.285226	UP
BICD1	174.972	0.583054	0.249919	2.33297	0.0196497	0.28597	NOT
SNX13	355.741	-0.428556	0.183787	-2.33181	0.0197105	0.286549	NOT
PCBP1	450.587	0.378454	0.162519	2.32868	0.0198761	0.288395	NOT
TMEM66	257.56	-0.423074	0.181685	-2.32861	0.0198798	0.288395	NOT
BRP44	102.573	-0.636461	0.273391	-2.32803	0.0199106	0.288534	NOT
HPGDS	84.0513	-1.13136	0.486137	-2.32724	0.0199527	0.288837	DOWN
PRR11	48.6696	0.91924	0.395161	2.32624	0.0200056	0.289057	NOT
SMU1	199.717	-0.526912	0.226549	-2.32582	0.0200279	0.289057	NOT
DHX30	64.9386	0.863269	0.371247	2.32532	0.0200548	0.289057	NOT
FAM83H	31.5778	1.33435	0.574024	2.32455	0.0200959	0.289057	UP
GIGYF1	18.3174	1.28807	0.554426	2.32325	0.0201655	0.289057	UP
PRPSAP2	28.2487	1.28626	0.553669	2.32316	0.0201708	0.289057	UP
MRPL32	42.6292	-0.775086	0.333654	-2.32302	0.0201781	0.289057	NOT
POLA2	27.4188	-1.36545	0.58782	-2.3229	0.0201846	0.289057	DOWN
TTC39B	184.97	0.686084	0.29537	2.3228	0.02019	0.289057	NOT
FA2H	15.4672	1.98173	0.853302	2.32243	0.0202098	0.289057	UP
FRMD3	12.5889	-1.44014	0.620335	-2.32155	0.0202571	0.289057	DOWN
ZDHHC21	248.863	-0.613782	0.264385	-2.32154	0.0202576	0.289057	NOT
COG1	76.4596	0.7982	0.343826	2.32152	0.0202585	0.289057	NOT
SEC61G	104.245	0.751024	0.323521	2.3214	0.020265	0.289057	NOT
RG9MTD3	30.3352	0.965786	0.416231	2.32031	0.020324	0.289294	NOT
C13orf27	9.64232	-1.4311	0.616793	-2.32023	0.0203285	0.289294	DOWN
LPP-AS2	24.5682	-1.43039	0.61657	-2.31992	0.0203453	0.289294	DOWN
C19orf47	15.2211	1.45495	0.627347	2.31922	0.0203832	0.289531	UP
GSTCD	51.9851	0.947418	0.408666	2.31832	0.020432	0.289922	NOT
PLA2G6	6.66381	-2.0912	0.902515	-2.31708	0.0204995	0.290335	DOWN
COX17	31.9101	-0.81045	0.349839	-2.31664	0.0205236	0.290335	NOT
FBXO27	12.6009	1.80371	0.778598	2.31661	0.0205251	0.290335	UP
CLDN11	166.867	-0.835533	0.360816	-2.31568	0.0205758	0.290751	NOT
ABHD15	46.7841	0.969517	0.418959	2.31411	0.0206617	0.29148	NOT
DYNLL2	57.5275	-0.67312	0.290896	-2.31395	0.0206702	0.29148	NOT
CXCL10	48.0711	-1.85994	0.805324	-2.30955	0.020913	0.294275	DOWN
SC5DL	284.056	-0.608067	0.263323	-2.30921	0.0209321	0.294275	NOT
HS6ST1	40.8021	0.991404	0.42933	2.30919	0.0209333	0.294275	NOT
CCNY	474.643	-0.472209	0.204576	-2.30823	0.0209861	0.294316	NOT
CXorf56	8.04986	-1.33087	0.576612	-2.30808	0.0209948	0.294316	DOWN
NAP1L1	1880.06	-0.333143	0.144345	-2.30797	0.0210009	0.294316	NOT
ORC2	88.2731	0.716786	0.310682	2.30714	0.0210473	0.294365	NOT
MDFIC	416.252	-0.469577	0.203536	-2.30709	0.0210499	0.294365	NOT
C9orf95	53.5063	-1.04733	0.454036	-2.30672	0.0210705	0.294365	DOWN
TRIP4	68.7188	-0.846707	0.367173	-2.30601	0.0211098	0.294365	NOT
DHRS11	3.31014	2.56116	1.11117	2.30493	0.0211707	0.294365	UP
SLC31A1	371.351	0.598759	0.259774	2.30492	0.021171	0.294365	NOT
ST8SIA4	204.667	-0.523439	0.227118	-2.3047	0.0211835	0.294365	NOT
CCDC9	3.89606	1.58667	0.688523	2.30446	0.0211968	0.294365	UP
PSMB8	50.2861	-0.821389	0.356449	-2.30437	0.0212021	0.294365	NOT
GEMIN4	41.4182	-1.11041	0.481989	-2.30381	0.0212331	0.294365	DOWN
PTPRF	94.895	0.816276	0.35434	2.30365	0.0212422	0.294365	NOT
COX5B	38.8715	0.688622	0.299081	2.30246	0.0213091	0.294993	NOT
POLR3F	59.005	-0.922296	0.400777	-2.30127	0.0213764	0.295326	NOT
FOS	374.659	0.902597	0.392217	2.30127	0.0213765	0.295326	NOT
SRSF2	270.775	0.508029	0.220927	2.29953	0.0214748	0.296095	NOT
APCDD1	364.856	0.65973	0.286946	2.29915	0.0214966	0.296095	NOT
UNC50	77.4136	-0.806531	0.350798	-2.29913	0.0214975	0.296095	NOT
CSNK1E	128.939	0.569897	0.247953	2.2984	0.0215389	0.296112	NOT
ACAP3	5.36845	1.64381	0.715269	2.29817	0.0215519	0.296112	UP
MEX3C	203.387	-0.417071	0.181505	-2.29785	0.0215705	0.296112	NOT
PZP	20.8876	-1.27494	0.554907	-2.29758	0.0215856	0.296112	DOWN
POSTN	12325.4	0.620736	0.270645	2.29354	0.021817	0.298985	NOT
LARP4	417.413	0.421118	0.183685	2.29261	0.0218704	0.299415	NOT
TTK	17.8916	1.617	0.705674	2.29143	0.0219383	0.299897	UP
MUT	72.51	-0.673006	0.29373	-2.29124	0.0219496	0.299897	NOT
CTSH	243.407	-0.72692	0.317463	-2.28978	0.0220343	0.300161	NOT
DENR	79.2709	-0.560617	0.244862	-2.28953	0.0220488	0.300161	NOT
UBE2K	300.992	0.337485	0.147412	2.28941	0.0220558	0.300161	NOT
EPS8L2	6.14696	1.33114	0.581485	2.28921	0.0220669	0.300161	UP
CROT	79.8664	-0.97236	0.424833	-2.28881	0.0220907	0.300161	NOT
NR4A1	249.597	1.07384	0.469232	2.28852	0.0221075	0.300161	UP
SYNPO2	877.956	-0.512808	0.224112	-2.28818	0.022127	0.300161	NOT
ZNF512	170.925	-0.636506	0.278222	-2.28777	0.0221512	0.300161	NOT
LAX1	28.7625	-1.18826	0.51946	-2.28749	0.0221672	0.300161	DOWN
VILL	5.44104	2.15647	0.942903	2.28705	0.0221929	0.300211	UP
IFITM10	9.09503	1.63001	0.712865	2.28657	0.0222212	0.300294	UP
FAM120C	80.706	0.926872	0.405591	2.28524	0.0222988	0.300794	NOT
VPS13C	1865.66	-0.421956	0.184683	-2.28476	0.0223269	0.300794	NOT
DMKN	10.4395	1.72631	0.755722	2.28431	0.0223531	0.300794	UP
HIF1AN	122.39	0.849058	0.371744	2.28399	0.0223722	0.300794	NOT
CA9	8.45688	2.17973	0.954382	2.28391	0.0223766	0.300794	UP
KRT23	9.77087	2.25131	0.985838	2.28365	0.0223919	0.300794	UP
ARL11	11.7719	-1.64059	0.718589	-2.28307	0.0224265	0.300794	DOWN
MCOLN3	5.95615	-2.42266	1.06121	-2.28293	0.0224348	0.300794	DOWN
IFI27L1	7.91457	1.69994	0.74497	2.28188	0.0224962	0.301321	UP
ZNF280C	141.714	-0.647462	0.283832	-2.28115	0.0225399	0.30133	NOT
FOXM1	27.8152	1.40541	0.616152	2.28095	0.0225517	0.30133	UP
TUG1	1497.45	0.280629	0.123049	2.28062	0.0225708	0.30133	NOT
SRXN1	27.2942	1.09401	0.479815	2.28007	0.0226037	0.30133	UP
INHBB	50.7672	1.28338	0.562883	2.28	0.0226075	0.30133	UP
LOC100506153	20.1968	1.96731	0.863517	2.27826	0.0227111	0.302416	UP
CSTF3	168.947	-0.553002	0.242809	-2.27752	0.0227551	0.302705	NOT
LARP6	50.9629	0.821596	0.360821	2.27702	0.0227853	0.302811	NOT
LOC493754	120.589	0.452279	0.19878	2.27527	0.0228897	0.303191	NOT
CD55	2815.97	0.533273	0.234395	2.2751	0.0228998	0.303191	NOT
TEX10	125.519	0.629303	0.27666	2.27464	0.0229276	0.303191	NOT
ACTR2	1719.49	-0.355839	0.15644	-2.2746	0.0229299	0.303191	NOT
NELF	34.7481	0.957442	0.420961	2.27442	0.022941	0.303191	NOT
TMEM63B	76.0996	0.8751	0.384776	2.27431	0.0229475	0.303191	NOT
PKM2	1565.63	0.34672	0.1525	2.27357	0.0229919	0.303484	NOT
GALNT10	322.996	0.527936	0.232365	2.27201	0.0230857	0.304427	NOT
NPC1	230.608	0.588376	0.259109	2.27077	0.0231609	0.305124	NOT
KIF21A	131.942	0.668881	0.294969	2.26763	0.0233515	0.307145	NOT
PEF1	70.8886	1.00216	0.441965	2.2675	0.0233595	0.307145	UP
TMCO7	42.7166	-0.817832	0.36076	-2.26697	0.023392	0.307277	NOT
PELI3	7.39508	1.2393	0.546903	2.26604	0.0234492	0.30754	UP
EEF1D	326.413	0.574919	0.253741	2.26577	0.0234654	0.30754	NOT
TMPRSS2	22.727	2.13023	0.940274	2.26554	0.0234798	0.30754	UP
LOC100507314	31.9264	1.35059	0.596509	2.26415	0.0235648	0.308258	UP
GPR172A	17.3488	1.32499	0.585538	2.26286	0.0236446	0.308258	UP
NME5	23.789	-1.3889	0.613859	-2.26258	0.0236617	0.308258	DOWN
BMPR1A	213.678	-0.47929	0.211845	-2.26245	0.0236695	0.308258	NOT
PKIB	9.92554	-1.30749	0.577912	-2.26244	0.0236704	0.308258	DOWN
C19orf66	54.4006	0.861963	0.38107	2.26196	0.0237002	0.308258	NOT
ITIH3	13.1768	-1.62224	0.717465	-2.26107	0.0237547	0.308258	DOWN
FER1L6	10.1903	-1.92288	0.850549	-2.26075	0.0237745	0.308258	DOWN
FRG1	58.31	-0.532417	0.23551	-2.26069	0.0237782	0.308258	NOT
LRRK2	240.505	-0.503084	0.222549	-2.26056	0.0237865	0.308258	NOT
CD180	66.2665	-0.889348	0.393545	-2.25984	0.0238312	0.308258	NOT
ACSS2	31.2405	1.14561	0.50695	2.25981	0.0238328	0.308258	UP
KLHL3	51.6839	1.04379	0.461926	2.25964	0.0238436	0.308258	UP
DTNA	67.2083	-0.953603	0.422041	-2.25951	0.0238519	0.308258	NOT
LOC100190939	19.8034	0.791514	0.350383	2.259	0.0238836	0.308258	NOT
PEA15	1325.54	-0.278018	0.123107	-2.25835	0.0239241	0.308258	NOT
STX19	4.00127	1.61847	0.716687	2.25826	0.0239293	0.308258	UP
UCK2	74.9317	0.729087	0.322888	2.25802	0.0239444	0.308258	NOT
C14orf79	7.02667	1.73966	0.770751	2.2571	0.0240019	0.308258	UP
C1orf216	29.5501	1.01011	0.447682	2.25632	0.0240506	0.308258	UP
LOC100652998	286.902	-0.505579	0.224081	-2.25624	0.0240558	0.308258	NOT
SIN3A	426.619	0.445593	0.197541	2.2557	0.0240893	0.308258	NOT
TATDN3	40.0428	-1.02691	0.455305	-2.25544	0.0241059	0.308258	DOWN
GVINP1	113.932	-0.884221	0.392075	-2.25524	0.0241185	0.308258	NOT
CD248	530.228	0.63648	0.282223	2.25524	0.0241186	0.308258	NOT
SH2D1A	9.38503	-1.54642	0.685723	-2.25516	0.024123	0.308258	DOWN
PDHA1	90.7487	-0.579601	0.257059	-2.25474	0.0241499	0.308313	NOT
ARL5B	237.78	0.593678	0.263509	2.25297	0.0242611	0.309442	NOT
GFOD1	17.0866	1.28543	0.570695	2.2524	0.0242971	0.309579	UP
C4orf29	56.9602	0.72213	0.32065	2.25208	0.0243172	0.309579	NOT
PLXDC1	242.392	-0.70955	0.315191	-2.25118	0.0243744	0.310017	NOT
ZNF557	51.377	-0.886134	0.393764	-2.25042	0.0244226	0.31034	NOT
VPS28	105.8	0.774329	0.344342	2.24872	0.0245303	0.311182	NOT
SGPP2	10.8909	1.45154	0.645516	2.24865	0.0245345	0.311182	UP
C9orf102	115.687	0.760938	0.338517	2.24786	0.0245852	0.311464	NOT
PPARD	200.992	0.732234	0.325787	2.24759	0.0246025	0.311464	NOT
GNB2	43.1341	-0.733274	0.326408	-2.24649	0.0246724	0.312059	NOT
LOC404266	5.32243	1.79975	0.801545	2.24536	0.0247452	0.31269	UP
MED11	19.9774	-1.69398	0.754608	-2.24485	0.0247779	0.312718	DOWN
CHRNB1	9.62898	-1.33667	0.595631	-2.24412	0.0248244	0.312718	DOWN
ARV1	117.17	0.749304	0.333921	2.24396	0.0248351	0.312718	NOT
ZNF175	90.8977	-0.785331	0.350038	-2.24356	0.024861	0.312718	NOT
LOC729915	7.19389	1.85656	0.827539	2.24347	0.0248663	0.312718	UP
MAP3K11	20.9149	-1.25121	0.557885	-2.24278	0.024911	0.312718	DOWN
CIB2	3.80671	1.87033	0.834217	2.24202	0.0249603	0.312718	UP
LPIN1	171.043	-0.688693	0.307183	-2.24197	0.0249636	0.312718	NOT
RNF219	140.483	-0.599122	0.26731	-2.2413	0.0250065	0.312718	NOT
RASGRP3	132.547	-0.819812	0.365809	-2.24109	0.0250201	0.312718	NOT
LRP2BP	37.5044	0.988503	0.441145	2.24077	0.0250411	0.312718	NOT
LOC100505828	9.12929	1.52589	0.68106	2.24046	0.0250609	0.312718	UP
CRNDE	2.95014	2.16869	0.968165	2.24	0.0250906	0.312718	UP
GALNTL4	13.8249	1.68243	0.751175	2.23974	0.0251079	0.312718	UP
ANKRD19P	28.5369	-0.814026	0.363449	-2.23973	0.0251087	0.312718	NOT
CYB5RL	6.20529	1.88863	0.843303	2.23956	0.0251196	0.312718	UP
PIGQ	46.9631	-1.10696	0.49434	-2.23928	0.0251377	0.312718	DOWN
METTL7B	8.38437	1.92037	0.858176	2.23774	0.0252383	0.313682	UP
MAGED1	776.601	0.492195	0.220083	2.23641	0.0253251	0.314216	NOT
MKI67	455.611	0.768604	0.343683	2.23637	0.0253274	0.314216	NOT
MAD1L1	10.7741	1.50751	0.674648	2.23451	0.0254497	0.314401	UP
WRB	54.9426	-0.835428	0.373887	-2.23444	0.0254542	0.314401	NOT
HKR1	72.7081	1.0343	0.462904	2.23437	0.0254589	0.314401	UP
SYF2	185.994	0.547743	0.245167	2.23416	0.0254723	0.314401	NOT
ARHGAP39	4.41099	1.80354	0.807389	2.2338	0.0254966	0.314401	UP
C4orf21	50.0226	-0.967664	0.433209	-2.23371	0.0255019	0.314401	NOT
KCTD1	70.3633	0.762602	0.34141	2.23368	0.0255038	0.314401	NOT
SHE	49.0391	-1.1568	0.518177	-2.23244	0.0255859	0.314868	DOWN
TCFL5	50.164	-0.915572	0.410127	-2.23241	0.0255879	0.314868	NOT
IL2RG	254.151	-0.781911	0.350603	-2.23019	0.0257349	0.316391	NOT
TNFSF13B	113.676	-0.744802	0.334021	-2.22981	0.0257604	0.316418	NOT
TTC33	90.4146	-0.697694	0.312982	-2.22918	0.025802	0.316645	NOT
FAM104A	52.1567	0.689378	0.309568	2.2269	0.0259537	0.318219	NOT
MRPS35	63.6651	0.731791	0.328668	2.22654	0.0259783	0.318234	NOT
RAB18	311.323	-0.43224	0.194208	-2.22565	0.0260375	0.31833	NOT
FBXL2	95.9916	0.801385	0.360101	2.22545	0.0260512	0.31833	NOT
TMEM87A	550.845	0.43116	0.193748	2.22536	0.0260568	0.31833	NOT
ARL1	557.61	-0.447802	0.201282	-2.22475	0.026098	0.31833	NOT
HAUS5	27.8072	1.38535	0.622792	2.22441	0.0261207	0.31833	UP
KCNT2	118.485	-0.722696	0.324992	-2.22373	0.0261663	0.31833	NOT
HIVEP2	846.815	0.346473	0.155858	2.22301	0.0262154	0.31833	NOT
LOC100506528	27.8809	-1.0273	0.462177	-2.22275	0.0262327	0.31833	DOWN
RBM22	115.115	0.6859	0.308607	2.22257	0.0262448	0.31833	NOT
TPMT	72.796	-0.714646	0.321617	-2.22204	0.0262807	0.31833	NOT
PEX7	21.3312	1.24698	0.561189	2.22204	0.0262807	0.31833	UP
TRIM37	125.346	0.556688	0.250545	2.2219	0.0262897	0.31833	NOT
MRPS14	131.023	-0.824373	0.371031	-2.22185	0.0262936	0.31833	NOT
PPM1D	107.635	-0.828679	0.373017	-2.22156	0.0263133	0.31833	NOT
ZFAT	46.4343	1.00925	0.454405	2.22104	0.0263481	0.318468	UP
CCDC101	23.8655	-1.19305	0.53731	-2.22041	0.0263909	0.318703	DOWN
TES	342.026	0.544433	0.245361	2.21891	0.026493	0.319612	NOT
PCDHGB8P	12.9926	1.85411	0.83591	2.21807	0.0265499	0.319612	UP
C16orf70	78.5367	-0.722672	0.325852	-2.21779	0.026569	0.319612	NOT
CHMP6	10.64	1.25575	0.566234	2.21772	0.0265739	0.319612	UP
ETV5	214.704	0.657004	0.296279	2.21752	0.0265876	0.319612	NOT
GBP4	381.161	-0.643962	0.290435	-2.21724	0.026607	0.319612	NOT
ZNF665	16.4837	1.33723	0.60328	2.2166	0.0266506	0.319854	UP
ANLN	157.322	0.807339	0.364381	2.21565	0.0267156	0.320352	NOT
CAPN3	8.24288	1.73132	0.781695	2.21483	0.0267717	0.320606	UP
SPTBN2	7.00219	1.98352	0.895633	2.21465	0.0267838	0.320606	UP
NBPF9	18.9024	1.00121	0.452485	2.21268	0.0269196	0.321947	UP
ARL4C	1044.31	0.377967	0.171007	2.21025	0.0270878	0.323675	NOT
PTPRC	912.441	-0.524578	0.237433	-2.20937	0.0271488	0.32412	NOT
TBC1D8B	157.279	0.692903	0.313751	2.20845	0.0272128	0.324422	NOT
HKDC1	9.2218	1.90773	0.86423	2.20743	0.0272841	0.324422	UP
USH2A	8.47973	1.99023	0.901789	2.20698	0.0273152	0.324422	UP
STIL	60.0532	0.902337	0.408856	2.20698	0.0273152	0.324422	NOT
VSIG10L	14.0957	1.86335	0.844315	2.20694	0.0273185	0.324422	UP
PPP1R16B	32.1457	-1.31549	0.596096	-2.20684	0.0273252	0.324422	DOWN
RUNDC1	31.7349	0.909176	0.412023	2.20662	0.0273408	0.324422	NOT
KIAA0141	80.8787	-0.784555	0.355958	-2.20407	0.0275196	0.32518	NOT
KCTD18	55.508	0.909669	0.412775	2.20379	0.0275392	0.32518	NOT
C20orf30	163.255	-0.541459	0.245701	-2.20373	0.0275434	0.32518	NOT
LOC100499177	87.8548	0.741295	0.336423	2.20346	0.0275622	0.32518	NOT
UPRT	25.5038	0.977776	0.443753	2.20343	0.0275648	0.32518	NOT
OCLN	51.9898	-1.17342	0.532719	-2.20269	0.0276164	0.32518	DOWN
IGSF8	33.6964	1.17355	0.532782	2.20269	0.0276166	0.32518	UP
EIF3D	254.166	0.484899	0.220144	2.20265	0.0276195	0.32518	NOT
CSDAP1	25.2676	0.525462	0.238559	2.20265	0.0276196	0.32518	NOT
NRARP	13.2955	1.38824	0.630464	2.20194	0.0276697	0.325254	UP
NIP7	101.209	-0.905598	0.411299	-2.2018	0.0276794	0.325254	NOT
SLC35E1	234.842	0.584961	0.265705	2.20154	0.0276975	0.325254	NOT
SLC16A13	7.71951	2.26164	1.02751	2.20109	0.0277296	0.325321	UP
LDOC1L	80.1577	0.715154	0.324953	2.20079	0.0277509	0.325321	NOT
RNF5P1	8.49977	1.19101	0.541414	2.19981	0.0278204	0.325855	UP
RFC4	17.8006	1.22462	0.556785	2.19944	0.0278467	0.325883	UP
ZNF772	84.805	-0.818419	0.372282	-2.19838	0.027922	0.326198	NOT
SLC9A1	191.468	0.616979	0.280691	2.19807	0.0279441	0.326198	NOT
TMEM223	25.6949	1.06888	0.486344	2.19779	0.0279639	0.326198	UP
MON1B	69.2544	0.764559	0.347888	2.19772	0.0279694	0.326198	NOT
RUNX1	2558.36	0.315889	0.143779	2.19705	0.0280166	0.326468	NOT
C19orf63	155.31	0.6867	0.31264	2.19646	0.0280594	0.326688	NOT
REXO2	154.11	-0.619075	0.281956	-2.19564	0.0281175	0.327057	NOT
ZNRF3	54.441	0.923718	0.420768	2.19532	0.028141	0.327057	NOT
TMEM68	67.1404	0.742851	0.338454	2.19483	0.0281756	0.327057	NOT
FXYD3	85.075	1.16901	0.53266	2.19467	0.0281871	0.327057	UP
PSTK	9.91904	1.68241	0.767413	2.19231	0.0283569	0.328431	UP
LOC100287803	359.389	-0.362265	0.165249	-2.19224	0.0283624	0.328431	NOT
IL2RB	77.7611	-0.911638	0.415889	-2.19202	0.0283779	0.328431	NOT
DAB2	1928.03	-0.345221	0.157773	-2.18809	0.0286632	0.330685	NOT
ARSE	26.0754	1.59737	0.730129	2.18779	0.0286846	0.330685	UP
TMEM131	807.109	0.3036	0.138791	2.18746	0.0287087	0.330685	NOT
TMEM69	132.361	-0.690601	0.31571	-2.18746	0.0287093	0.330685	NOT
PHRF1	29.2874	0.973052	0.444891	2.18717	0.02873	0.330685	NOT
CYP20A1	193.175	-0.586787	0.268299	-2.18707	0.0287377	0.330685	NOT
TIMP2	3415.93	0.513043	0.234588	2.187	0.0287426	0.330685	NOT
CHD7	124.868	0.653831	0.299135	2.18574	0.028835	0.331072	NOT
ZDHHC4	33.8419	0.810123	0.370757	2.18505	0.0288853	0.331072	NOT
NARG2	315.658	-0.533436	0.244148	-2.18489	0.0288971	0.331072	NOT
CDC42BPA	1659.26	0.309964	0.141875	2.18477	0.028906	0.331072	NOT
USP20	24.064	1.09924	0.503295	2.18408	0.0289561	0.331072	UP
SLCO4C1	7.18659	-1.81952	0.833197	-2.18379	0.028978	0.331072	DOWN
RAPGEF5	535.708	-0.634248	0.290456	-2.18363	0.0289894	0.331072	NOT
PRG4	70.931	-1.49957	0.686737	-2.18362	0.0289905	0.331072	DOWN
C14orf49	11.2253	-1.37999	0.631994	-2.18356	0.028995	0.331072	DOWN
SLC41A1	259.297	0.603782	0.276633	2.18261	0.0290644	0.331095	NOT
C7orf49	21.8373	1.3286	0.608743	2.18254	0.0290699	0.331095	UP
HINT3	101.737	-0.651842	0.298678	-2.18243	0.0290781	0.331095	NOT
WDR13	61.385	0.812113	0.372152	2.18221	0.0290942	0.331095	NOT
ZSCAN20	19.4951	-1.37016	0.62829	-2.18078	0.0291998	0.331981	DOWN
GIMAP8	54.9972	-1.01058	0.463473	-2.18045	0.0292244	0.331981	DOWN
SEMA3B	10.2074	1.73506	0.795837	2.18017	0.0292451	0.331981	UP
GLP2R	33.1671	-1.51277	0.694006	-2.17976	0.0292752	0.332046	DOWN
PDXDC2P	22.502	0.879054	0.403356	2.17935	0.0293056	0.332114	NOT
LSR	70.299	1.07359	0.492816	2.17848	0.0293703	0.332571	UP
VDAC2	101.874	0.467449	0.214647	2.17775	0.0294245	0.332611	NOT
CPVL	86.2615	-0.772858	0.354893	-2.17772	0.029427	0.332611	NOT
SLC25A30	80.7285	-0.688007	0.315969	-2.17745	0.0294471	0.332611	NOT
TCERG1	329.865	0.387587	0.178058	2.17675	0.0294991	0.332786	NOT
HMOX1	90.5949	0.95319	0.438001	2.17623	0.0295383	0.332786	NOT
ARID1A	529.173	0.456907	0.210015	2.17559	0.0295861	0.332786	NOT
CTIF	150.582	0.669886	0.307935	2.17541	0.0295994	0.332786	NOT
LOC100133299	23.6521	1.21261	0.557423	2.17539	0.0296008	0.332786	UP
MARCH8	81.8676	-0.72842	0.334863	-2.17528	0.0296092	0.332786	NOT
MLYCD	3.95498	-1.48622	0.683613	-2.17406	0.0297007	0.3334	DOWN
POLD1	7.09913	1.9449	0.894659	2.1739	0.0297128	0.3334	UP
HNF1B	20.3146	1.50772	0.693938	2.1727	0.0298027	0.334133	UP
SLC44A3	51.8556	0.95983	0.44193	2.17191	0.0298626	0.33453	NOT
SP2	152.53	0.709171	0.326601	2.17137	0.0299035	0.334713	NOT
PLEKHA5	461.684	0.472793	0.217783	2.17094	0.029936	0.334739	NOT
ZNF428	8.02357	1.09918	0.506468	2.17029	0.0299852	0.334739	UP
ORMDL3	44.2464	0.687209	0.316646	2.17027	0.0299862	0.334739	NOT
SMURF2	222.878	0.507464	0.23387	2.16986	0.0300178	0.334739	NOT
OBFC2B	70.2751	-0.866214	0.39923	-2.16971	0.0300287	0.334739	NOT
SCG5	47.3324	0.820154	0.37808	2.16926	0.030063	0.334847	NOT
ZNF582	4.20608	-1.71089	0.788979	-2.16849	0.0301214	0.335224	DOWN
CCDC86	20.7953	1.23116	0.567911	2.16788	0.0301676	0.335464	UP
PDPK1	139.263	-0.623004	0.287455	-2.16731	0.0302112	0.335674	NOT
SPAG17	14.4326	1.29964	0.599795	2.16681	0.0302493	0.335739	UP
RNF2	204.555	-0.690368	0.318643	-2.16659	0.0302663	0.335739	NOT
PSMA7	251.457	-0.553848	0.255765	-2.16546	0.0303524	0.335969	NOT
PIK3AP1	172.907	-0.69653	0.321719	-2.16502	0.0303858	0.335969	NOT
SCN7A	350.959	-0.922752	0.426256	-2.16478	0.0304044	0.335969	NOT
CTDSP1	94.0961	0.705713	0.326107	2.16406	0.0304601	0.335969	NOT
NT5C2	211.127	-0.512385	0.236789	-2.16389	0.0304728	0.335969	NOT
ZSCAN30	42.9705	0.852255	0.393877	2.16376	0.0304828	0.335969	NOT
C15orf33	15.0469	-1.24702	0.57643	-2.16335	0.0305139	0.335969	DOWN
TAPT1	127.415	0.683916	0.31616	2.1632	0.0305259	0.335969	NOT
CHAC2	4.06828	1.57894	0.72991	2.16319	0.0305262	0.335969	UP
CCL22	140.273	-1.21334	0.560925	-2.1631	0.0305336	0.335969	DOWN
PRKCH	115.333	-0.766595	0.354492	-2.16252	0.0305784	0.336036	NOT
SZT2	82.449	-0.860037	0.397836	-2.16179	0.0306344	0.336036	NOT
ESRP1	142.79	1.18663	0.549072	2.16116	0.0306833	0.336036	UP
ARHGDIB	836.322	-0.342254	0.158381	-2.16095	0.0306991	0.336036	NOT
DEDD2	51.8653	0.936535	0.433398	2.16091	0.0307021	0.336036	NOT
FOLR2	40.7787	-0.98809	0.457353	-2.16046	0.0307375	0.336036	NOT
LOC389906	5.1881	1.38229	0.639886	2.16022	0.0307555	0.336036	UP
GOLGA2	130.302	0.548034	0.253736	2.15986	0.0307832	0.336036	NOT
GBP1	466.303	-0.418788	0.193954	-2.15921	0.0308338	0.336036	NOT
KIAA1244	53.3479	1.03521	0.479445	2.15918	0.0308361	0.336036	UP
PIK3CB	92.8103	0.672777	0.311609	2.15904	0.0308469	0.336036	NOT
CALCOCO2	291.076	0.468947	0.217202	2.15904	0.0308474	0.336036	NOT
CWC25	72.8245	0.826345	0.382768	2.15887	0.0308605	0.336036	NOT
CD200R1	16.9107	-1.57574	0.730194	-2.15798	0.0309297	0.336112	DOWN
HSPH1	765.824	0.390922	0.181159	2.15789	0.0309362	0.336112	NOT
C5orf30	12.0453	-1.21326	0.562393	-2.15732	0.0309811	0.336112	DOWN
PHYH	59.4659	-0.776721	0.360061	-2.15719	0.0309905	0.336112	NOT
AP1S1	8.70164	1.32032	0.612055	2.15719	0.0309908	0.336112	UP
APOD	7751.71	-0.709051	0.328875	-2.15599	0.0310845	0.336716	NOT
NANP	53.5477	-0.966091	0.448127	-2.15584	0.0310959	0.336716	NOT
TRAF4	16.3999	1.37037	0.63584	2.15521	0.0311457	0.336979	UP
STAT4	67.5925	-1.1011	0.510974	-2.1549	0.0311697	0.336979	DOWN
BDH1	4.77394	2.17587	1.01014	2.15402	0.0312385	0.337455	UP
SLC25A13	69.9461	0.797655	0.370589	2.1524	0.0313661	0.338306	NOT
CCDC66	96.1844	-0.481738	0.223848	-2.15208	0.0313911	0.338306	NOT
RHOBTB3	1051.05	0.41174	0.191331	2.15198	0.0313986	0.338306	NOT
GCLM	101.538	-0.611894	0.284369	-2.15176	0.0314166	0.338306	NOT
LANCL1	257.642	-0.452077	0.210203	-2.15068	0.0315018	0.33863	NOT
DSEL	355.696	-0.469194	0.218187	-2.15042	0.0315221	0.33863	NOT
MOSPD1	72.07	0.813044	0.378089	2.1504	0.0315233	0.33863	NOT
TMEM160	8.369	1.13858	0.529545	2.15011	0.0315461	0.33863	UP
LAMC2	560.07	0.798668	0.371591	2.14932	0.031609	0.339038	NOT
RBMS3	615.525	-0.477928	0.222484	-2.14814	0.0317025	0.339707	NOT
RCAN1	180.183	0.631631	0.294068	2.14791	0.0317213	0.339707	NOT
FBRS	38.7528	0.971218	0.452303	2.14728	0.0317713	0.339976	NOT
ISY1	34.2799	1.03394	0.481607	2.14686	0.0318043	0.340062	UP
DGUOK	81.3124	0.814857	0.379658	2.14629	0.0318495	0.340278	NOT
CDKN1B	282	-0.462595	0.215594	-2.14568	0.0318989	0.340322	NOT
CAMKK2	149.886	-0.582419	0.271446	-2.14562	0.0319036	0.340322	NOT
FOXC1	68.9425	0.8238	0.384095	2.14478	0.0319704	0.340471	NOT
CHRDL2	20.9607	2.51228	1.17155	2.14441	0.0320003	0.340471	UP
GPR115	11.4245	1.74612	0.814326	2.14426	0.0320122	0.340471	UP
NDUFAF4	43.3566	0.897094	0.418384	2.14419	0.0320176	0.340471	NOT
THBS1	12367.8	0.437403	0.204065	2.14345	0.0320768	0.340835	NOT
PAQR7	52.3771	-0.703526	0.328298	-2.14295	0.0321174	0.341	NOT
OCRL	234.267	-0.53209	0.248372	-2.14231	0.0321687	0.341217	NOT
ARID5B	1389.18	0.362895	0.169413	2.14207	0.0321879	0.341217	NOT
NMB	8.30361	1.78739	0.834767	2.14118	0.0322595	0.34126	UP
BTLA	9.55021	-1.78526	0.834023	-2.14054	0.0323111	0.34126	DOWN
LOC100505487	315.757	0.382052	0.178509	2.14023	0.0323361	0.34126	NOT
C15orf42	12.6042	1.61072	0.752602	2.1402	0.0323387	0.34126	UP
LMAN1	1105.35	0.335012	0.156537	2.14014	0.0323434	0.34126	NOT
CTAGE1	14.8298	-0.699598	0.326898	-2.14011	0.0323458	0.34126	NOT
MRPL53	28.6633	-0.977374	0.456803	-2.1396	0.0323875	0.34126	NOT
ZNF334	21.5253	-1.11464	0.521027	-2.13931	0.0324104	0.34126	DOWN
LOC283335	7.87103	-1.88667	0.88194	-2.13922	0.0324175	0.34126	DOWN
LOC100272228	14.7245	2.04132	0.955065	2.13737	0.032568	0.341988	UP
DHX32	176.997	0.527825	0.24699	2.13703	0.0325956	0.341988	NOT
TMEM199	18.8207	1.32314	0.619175	2.13694	0.0326026	0.341988	UP
CCDC97	72.4898	0.755421	0.353588	2.13644	0.0326432	0.341988	NOT
NCLN	33.5275	0.929153	0.434918	2.13639	0.0326479	0.341988	NOT
LINC00478	106.555	-0.785168	0.367571	-2.1361	0.0326711	0.341988	NOT
DAGLB	42.141	1.09516	0.512873	2.13534	0.032733	0.341988	UP
IVNS1ABP	795.229	0.442589	0.207274	2.13528	0.0327379	0.341988	NOT
SNX16	75.7351	-0.695156	0.32556	-2.13526	0.0327397	0.341988	NOT
PJA1	52.1249	-0.8026	0.376009	-2.13452	0.0328002	0.341988	NOT
C10orf88	63.0841	-0.888237	0.416193	-2.1342	0.0328267	0.341988	NOT
LEMD1	3.17981	2.4336	1.14033	2.13411	0.0328334	0.341988	UP
ADRBK2	175.948	-0.606137	0.284082	-2.13367	0.0328696	0.341988	NOT
WBSCR16	9.72302	1.37186	0.643072	2.13329	0.0329011	0.341988	UP
AMDHD2	5.59862	-1.79534	0.841613	-2.13321	0.0329073	0.341988	DOWN
DNAJC10	702.235	-0.371525	0.174252	-2.13211	0.0329979	0.341988	NOT
DKK2	115.827	-0.858718	0.402811	-2.13181	0.0330221	0.341988	NOT
DNTTIP2	427.342	0.509989	0.23926	2.13153	0.0330459	0.341988	NOT
UMPS	28.5164	-0.843009	0.395501	-2.13149	0.0330484	0.341988	NOT
FP6628	7.39615	1.33758	0.627566	2.13138	0.033058	0.341988	UP
ACO1	288.713	0.480305	0.225367	2.13121	0.0330719	0.341988	NOT
RABL2B	18.8172	1.01615	0.476904	2.13072	0.0331124	0.341988	UP
SLITRK5	41.4551	-1.40366	0.658848	-2.13047	0.0331329	0.341988	DOWN
RRM2B	80.6496	-0.617418	0.289812	-2.13041	0.0331379	0.341988	NOT
PCGF5	616.283	-0.375774	0.176387	-2.13039	0.0331395	0.341988	NOT
GPN2	24.1445	-1.1717	0.550027	-2.13026	0.0331498	0.341988	DOWN
RASL11A	9.42101	-1.80655	0.848133	-2.13003	0.0331693	0.341988	DOWN
WDYHV1	21.6923	1.21607	0.571104	2.12934	0.0332261	0.341988	UP
SLC39A3	15.8858	1.28378	0.602903	2.12932	0.0332275	0.341988	UP
RB1	630.867	-0.333709	0.156732	-2.12918	0.0332397	0.341988	NOT
GUSBP2	2.93582	-1.98983	0.934809	-2.12859	0.0332881	0.342227	DOWN
MKL1	177.625	0.592141	0.278382	2.12708	0.0334132	0.343254	NOT
PMEPA1	880.803	0.467363	0.219765	2.12665	0.0334495	0.343368	NOT
GAMT	6.35292	-1.75205	0.824248	-2.12563	0.033534	0.343976	DOWN
C15orf5	15.2708	1.31846	0.620415	2.12513	0.0335759	0.343976	UP
NUP88	70.7811	0.796512	0.374874	2.12475	0.0336078	0.343976	NOT
SH3BGR	8.88425	-1.65063	0.77687	-2.12472	0.0336098	0.343976	DOWN
RNF220	142.773	0.74774	0.352027	2.1241	0.0336621	0.344253	NOT
SMURF1	124.907	0.645586	0.303998	2.12365	0.033699	0.344372	NOT
KIF5B	2003.44	-0.353868	0.166764	-2.12196	0.033841	0.345265	NOT
ZNF614	130.065	-0.615127	0.289907	-2.12181	0.0338534	0.345265	NOT
RFWD2	208.735	0.558449	0.263207	2.12171	0.0338624	0.345265	NOT
EBF1	211.393	-0.548976	0.258941	-2.12008	0.033999	0.346398	NOT
P4HA1	388.341	0.419906	0.198165	2.11898	0.0340926	0.346742	NOT
ZNF552	15.9384	-1.04234	0.491934	-2.11887	0.0341016	0.346742	DOWN
GSTO1	129.53	0.587074	0.277081	2.11878	0.0341091	0.346742	NOT
CNOT10	48.5105	-0.738889	0.348832	-2.11818	0.03416	0.347	NOT
MATN3	946.437	-0.814901	0.38504	-2.11641	0.0343103	0.348106	NOT
DNA2	12.2144	1.38173	0.6529	2.11629	0.0343199	0.348106	UP
FAM200B	55.3102	-0.493815	0.23344	-2.11538	0.0343975	0.348485	NOT
C1orf54	49.9817	-0.739352	0.349534	-2.11525	0.0344085	0.348485	NOT
UBFD1	143.149	0.605317	0.286243	2.1147	0.0344557	0.348704	NOT
SESN3	303.524	-0.4765	0.225403	-2.11399	0.034516	0.349055	NOT
TBC1D10A	18.8847	1.23686	0.585294	2.11322	0.0345815	0.349433	UP
PIK3R1	1060.49	-0.435471	0.206096	-2.11295	0.0346046	0.349433	NOT
FCGR3A	482.008	-0.524659	0.248402	-2.11214	0.0346747	0.349724	NOT
PYGB	97.7248	0.687236	0.325441	2.11171	0.0347117	0.349724	NOT
LOC100507322	20.1584	1.01433	0.480378	2.11154	0.0347263	0.349724	UP
ZNF302	78.7508	-0.59503	0.281853	-2.11114	0.0347602	0.349724	NOT
PRPS1	64.5563	-0.83702	0.396481	-2.11112	0.0347618	0.349724	NOT
SRRT	37.6172	0.8607	0.407884	2.11016	0.0348446	0.350297	NOT
PROX1	37.6597	1.43124	0.678549	2.10927	0.0349213	0.350756	UP
PEX11B	136.677	-0.714202	0.338651	-2.10896	0.0349482	0.350756	NOT
C1orf27	153.139	0.493818	0.234218	2.10837	0.034999	0.350756	NOT
RNF180	211.228	-0.592788	0.281332	-2.10708	0.035111	0.350756	NOT
NPNT	226.221	-0.763013	0.362123	-2.10706	0.0351126	0.350756	NOT
CCL11	76.9015	1.03033	0.488992	2.10705	0.0351136	0.350756	UP
NR5A2	80.7965	-1.09949	0.521875	-2.10681	0.035134	0.350756	DOWN
MYO3A	13.6636	-1.72067	0.816817	-2.10656	0.0351561	0.350756	DOWN
SERINC1	1566.96	-0.265911	0.12623	-2.10655	0.0351563	0.350756	NOT
ADAM32	12.5102	1.3891	0.659435	2.10651	0.0351604	0.350756	UP
PIK3CA	450.477	-0.360846	0.171313	-2.10636	0.0351735	0.350756	NOT
DYNLRB1	146.765	0.525685	0.249714	2.10515	0.0352786	0.351508	NOT
ALOX5AP	358.687	0.648767	0.308218	2.10489	0.0353005	0.351508	NOT
HLA-DOA	135.48	-0.781648	0.371581	-2.10357	0.0354156	0.351936	NOT
CPS1	49.9407	1.13101	0.537691	2.10345	0.0354266	0.351936	UP
FUT2	9.27691	1.84999	0.879582	2.10326	0.0354431	0.351936	UP
MPHOSPH6	45.8226	0.724773	0.344602	2.10322	0.0354468	0.351936	NOT
IAH1	119.844	0.690705	0.32855	2.10228	0.0355287	0.352439	NOT
RRN3	67.7028	-0.679048	0.323041	-2.10205	0.0355492	0.352439	NOT
CYSLTR2	9.13902	-1.49829	0.713192	-2.10082	0.0356569	0.353115	DOWN
PSIMCT-1	5.45459	-1.44608	0.688387	-2.10068	0.0356692	0.353115	DOWN
ZFR	632.953	-0.328746	0.156543	-2.10004	0.0357249	0.35341	NOT
LOC100505794	16.2151	-1.16215	0.55357	-2.09938	0.0357832	0.35373	DOWN
DHX9	498.992	0.39002	0.185808	2.09905	0.0358129	0.353766	NOT
CCDC165	42.2252	1.18048	0.562491	2.09867	0.0358464	0.35384	UP
ZNF841	67.4613	0.625974	0.298347	2.09814	0.0358927	0.354041	NOT
NFATC2IP	54.445	0.895605	0.42699	2.09748	0.0359507	0.354356	NOT
CH25H	60.172	0.905911	0.432031	2.09687	0.0360052	0.354637	NOT
FLOT1	536.38	0.449097	0.214267	2.09597	0.0360846	0.354912	NOT
BMPR2	4521.77	-0.270603	0.129121	-2.09573	0.0361059	0.354912	NOT
SPHK1	28.0734	0.973387	0.464475	2.09567	0.0361113	0.354912	NOT
XRN1	1158.62	-0.304602	0.145378	-2.09525	0.0361491	0.35497	NOT
LYPLAL1	34.8315	-0.717065	0.342309	-2.09479	0.0361897	0.35497	NOT
RRAS2	46.5326	0.784576	0.37464	2.09421	0.0362409	0.35497	NOT
LOC100287290	6.18657	-1.5277	0.729489	-2.09421	0.0362416	0.35497	DOWN
TRIM8	221.261	0.571054	0.27271	2.094	0.03626	0.35497	NOT
EPHX2	3.4708	1.78163	0.85099	2.0936	0.0362959	0.35497	UP
WDR73	28.264	0.980098	0.46815	2.09355	0.0362996	0.35497	NOT
EYA2	39.1405	1.36617	0.65266	2.09323	0.0363282	0.354995	UP
ARHGAP22	7.14125	1.3715	0.655431	2.09251	0.0363926	0.355174	UP
HAUS3	110.8	-0.640492	0.306133	-2.0922	0.0364208	0.355174	NOT
TAF1B	39.9806	0.796287	0.380606	2.09215	0.0364248	0.355174	NOT
GIMAP2	60.5283	-0.83918	0.401209	-2.09163	0.0364715	0.355376	NOT
APPL1	355.142	-0.369774	0.176999	-2.08913	0.0366958	0.356647	NOT
GPR65	65.8469	-0.889219	0.425812	-2.08829	0.0367717	0.356647	NOT
SND1	257.983	0.458186	0.219414	2.08822	0.0367779	0.356647	NOT
PDCD2L	16.0052	1.17717	0.563748	2.08811	0.0367881	0.356647	UP
BCL9	151.504	0.651061	0.311806	2.08803	0.0367948	0.356647	NOT
UCP2	254.855	-0.726386	0.347923	-2.08778	0.0368177	0.356647	NOT
CALR	1869.19	0.326287	0.156306	2.08749	0.0368443	0.356647	NOT
PALM2	39.4613	0.884748	0.423847	2.08742	0.0368501	0.356647	NOT
C3orf37	30.0123	-0.980487	0.469739	-2.0873	0.0368611	0.356647	NOT
GALT	8.09263	-1.32655	0.635542	-2.08727	0.0368638	0.356647	DOWN
SYCP2	15.0784	1.05895	0.507426	2.0869	0.0368972	0.356716	UP
SSRP1	202.062	0.559502	0.268251	2.08574	0.037002	0.357476	NOT
SRBD1	82.5731	-0.703495	0.337652	-2.08349	0.0372066	0.358392	NOT
RPL13AP5	1491.34	-0.407802	0.195733	-2.08346	0.0372091	0.358392	NOT
FAM120B	208.029	-0.533389	0.256014	-2.08343	0.0372118	0.358392	NOT
UBXN7	228.227	-0.612468	0.294023	-2.08306	0.0372454	0.358392	NOT
LOC644961	172.782	0.338003	0.162266	2.08302	0.0372493	0.358392	NOT
MEGF6	144.799	0.741344	0.355928	2.08285	0.037265	0.358392	NOT
MUC4	97.0066	1.0724	0.514982	2.08241	0.0373052	0.358392	UP
CACNB3	28.6363	0.845259	0.405914	2.08236	0.0373096	0.358392	NOT
PLIN3	93.8509	0.628088	0.301661	2.0821	0.0373335	0.358392	NOT
KIAA1522	57.3771	0.888767	0.427069	2.08109	0.0374261	0.358903	NOT
FMO3	52.1143	-1.00762	0.484219	-2.08092	0.037441	0.358903	DOWN
CG030	48.0076	0.69271	0.332973	2.08038	0.0374908	0.358903	NOT
HS1BP3	13.8296	-1.19761	0.575714	-2.08022	0.0375056	0.358903	DOWN
SMAD9	198.486	-0.600112	0.288533	-2.07987	0.0375375	0.358903	NOT
CLDN7	30.3417	1.2332	0.592944	2.07979	0.037545	0.358903	UP
HIST1H4C	8.88304	-1.2149	0.584403	-2.07887	0.0376289	0.358932	DOWN
KDELR1	462.952	0.358227	0.172331	2.07872	0.0376435	0.358932	NOT
GTF3C4	167.256	-0.671661	0.323175	-2.07832	0.0376797	0.358932	NOT
CDCP1	237.311	0.658764	0.31698	2.07825	0.0376861	0.358932	NOT
F11R	174.735	0.792683	0.381541	2.07758	0.0377479	0.358932	NOT
CASD1	70.7677	0.625791	0.301225	2.07749	0.0377566	0.358932	NOT
KCTD6	24.617	1.2586	0.605959	2.07705	0.0377972	0.358932	UP
C14orf21	8.64748	1.67333	0.805635	2.07704	0.0377981	0.358932	UP
SLC6A20	61.9288	-1.15049	0.553934	-2.07694	0.0378068	0.358932	DOWN
LOC100131067	16.4257	-1.1042	0.53166	-2.07689	0.0378115	0.358932	DOWN
PRR3	32.1171	0.957788	0.461269	2.07642	0.0378552	0.359097	NOT
FCER1G	224.025	-0.589191	0.283856	-2.07567	0.0379246	0.359505	NOT
CCT6B	3.81449	2.02422	0.97535	2.07538	0.0379517	0.359512	UP
CENPF	358.549	0.672832	0.324273	2.07489	0.0379965	0.359686	NOT
B3GALT4	12.7695	1.51562	0.730765	2.07402	0.0380773	0.360201	UP
RPS23	1186.95	-0.265671	0.128133	-2.0734	0.038135	0.360496	NOT
LOC386597	12.3104	1.26805	0.611808	2.07262	0.0382075	0.360846	UP
PABPC4L	92.1187	-0.728802	0.351692	-2.07227	0.0382401	0.360846	NOT
STAT1	979.191	-0.402036	0.194024	-2.07209	0.038257	0.360846	NOT
PHLDA2	6.49489	1.17944	0.569278	2.07182	0.0382819	0.360846	UP
SCN2A	29.7715	-1.15855	0.559281	-2.0715	0.0383125	0.360846	DOWN
PLOD2	2074.68	0.423006	0.204264	2.07088	0.0383701	0.360846	NOT
TMEM70	40.5015	0.717285	0.346392	2.07073	0.0383839	0.360846	NOT
PLSCR4	456.161	-0.351025	0.169518	-2.07073	0.0383839	0.360846	NOT
ATXN10	194.207	-0.670783	0.324065	-2.0699	0.0384616	0.360973	NOT
UCA1	15.6444	1.80178	0.870495	2.06984	0.0384675	0.360973	UP
MIR22HG	24.3328	0.90663	0.438041	2.06974	0.0384769	0.360973	NOT
ADAMTS9	158.705	0.688441	0.332725	2.0691	0.0385371	0.361288	NOT
STK32B	22.6893	1.34557	0.650577	2.06827	0.0386147	0.361767	UP
MANEA	251.217	-0.448356	0.216926	-2.06686	0.0387471	0.362726	NOT
CYP2C18	6.71496	1.78237	0.862457	2.06662	0.0387703	0.362726	UP
YY1	179.695	-0.402995	0.195081	-2.06578	0.0388489	0.363211	NOT
IL33	143.237	-0.881794	0.427031	-2.06494	0.0389284	0.363505	NOT
TIMP3	8317.98	0.470508	0.227861	2.06489	0.0389336	0.363505	NOT
AHCTF1	537.887	0.38834	0.188121	2.06431	0.0389883	0.363766	NOT
CCR6	13.6082	-1.37702	0.667221	-2.06382	0.039035	0.363952	DOWN
PLCG1	135.744	0.656134	0.318147	2.06236	0.0391734	0.364783	NOT
MTUS1	725.889	0.437682	0.212235	2.06225	0.0391841	0.364783	NOT
SRGAP1	313.889	0.491983	0.238591	2.06203	0.0392044	0.364783	NOT
GCFC1	78.5798	0.62381	0.30279	2.0602	0.0393791	0.365381	NOT
LMNB2	61.9528	0.65423	0.317625	2.05976	0.0394218	0.365381	NOT
GIGYF2	344.49	0.376375	0.182735	2.05968	0.0394295	0.365381	NOT
SEC24B	661.663	0.283852	0.137829	2.05944	0.0394517	0.365381	NOT
ZFP3	89.0798	-0.85161	0.413532	-2.05936	0.0394602	0.365381	NOT
ESRP2	18.4436	1.6955	0.823339	2.0593	0.0394657	0.365381	UP
ANKRD49	41.4001	-0.824308	0.40031	-2.05918	0.0394774	0.365381	NOT
TMEM9B	288.477	-0.40525	0.196817	-2.05901	0.039493	0.365381	NOT
QSOX1	385.997	0.479871	0.233087	2.05876	0.0395168	0.365381	NOT
PA2G4P4	102.717	-0.464045	0.225451	-2.0583	0.0395613	0.365381	NOT
FHL2	338.847	-0.439155	0.213388	-2.05801	0.0395889	0.365381	NOT
MED8	87.357	0.57513	0.279462	2.05799	0.039591	0.365381	NOT
SPICE1	102.128	0.534492	0.25976	2.05764	0.0396247	0.365381	NOT
ADAMTS9-AS2	15.4149	-1.37004	0.665897	-2.05744	0.0396441	0.365381	DOWN
PPP2R2B	20.8532	-1.08587	0.527958	-2.05673	0.0397121	0.365759	DOWN
ZBTB7A	164.412	0.417718	0.203297	2.05472	0.0399064	0.366861	NOT
INADL	116.464	0.741173	0.36075	2.05453	0.0399242	0.366861	NOT
SLC12A2	482.07	0.525803	0.25594	2.0544	0.0399372	0.366861	NOT
GZF1	84.299	0.738692	0.359608	2.05416	0.0399605	0.366861	NOT
SYAP1	220.336	0.400788	0.195142	2.05382	0.0399928	0.366861	NOT
ATF1	121.306	-0.51878	0.252598	-2.05378	0.0399968	0.366861	NOT
ZNF469	88.9881	0.843435	0.410722	2.05354	0.0400203	0.366861	NOT
EIF5B	920.09	0.36045	0.175562	2.05312	0.0400607	0.366911	NOT
NIPSNAP3B	25.4668	-1.09076	0.531318	-2.05293	0.0400795	0.366911	DOWN
SHANK2	37.8974	1.26253	0.615196	2.05224	0.0401468	0.367194	UP
CDC42BPB	347.313	0.391945	0.191001	2.05205	0.0401644	0.367194	NOT
SYNPO	840.648	-0.520583	0.253884	-2.05048	0.0403179	0.368351	NOT
STEAP2	636.258	0.426515	0.208048	2.05008	0.0403571	0.368461	NOT
NHP2L1	205.834	0.561825	0.274136	2.04944	0.0404194	0.368783	NOT
MRPL42	172.794	0.425656	0.207728	2.0491	0.040452	0.368834	NOT
PDRG1	9.05705	-1.35105	0.659528	-2.04851	0.04051	0.368881	DOWN
BATF2	9.12827	-1.59747	0.779943	-2.04819	0.0405416	0.368881	DOWN
MAP4K1	14.4525	1.56582	0.764686	2.04766	0.0405936	0.368881	UP
ABLIM2	18.7791	1.73458	0.847163	2.04751	0.0406079	0.368881	UP
SELT	312.805	-0.401314	0.196052	-2.04698	0.0406602	0.368881	NOT
ELL2	761.438	0.466928	0.228154	2.04655	0.0407027	0.368881	NOT
MIA3	986.652	0.340081	0.16618	2.04647	0.0407105	0.368881	NOT
NAPSB	15.1737	-1.35967	0.664466	-2.04625	0.0407314	0.368881	DOWN
SUPT5H	123.041	0.525811	0.256967	2.04622	0.0407346	0.368881	NOT
KRIT1	357.151	-0.412693	0.201693	-2.04614	0.0407424	0.368881	NOT
HIP1	388.185	0.447004	0.218485	2.04593	0.0407635	0.368881	NOT
CXCR6	30.7907	-1.31651	0.643554	-2.0457	0.0407863	0.368881	DOWN
SLC25A32	144.744	0.541437	0.264712	2.04538	0.040817	0.368881	NOT
STEAP1	46.5287	0.66507	0.325188	2.04519	0.0408363	0.368881	NOT
SLC7A1	162.155	0.716551	0.350479	2.04449	0.0409049	0.369197	NOT
DPF2	126.188	0.593861	0.290499	2.04428	0.0409256	0.369197	NOT
ARHGAP23	104.513	0.74359	0.36394	2.04316	0.0410362	0.369951	NOT
ZNF507	298.974	-0.454391	0.222477	-2.04241	0.0411105	0.370363	NOT
SNX33	138.906	0.634104	0.310508	2.04215	0.0411363	0.370363	NOT
FOXJ2	207.672	-0.504056	0.246886	-2.04166	0.0411858	0.370563	NOT
ASNSD1	146.436	-0.542454	0.265812	-2.04074	0.0412766	0.371135	NOT
LOC100093631	13.0701	0.984325	0.482801	2.03878	0.041472	0.372646	NOT
PISD	40.991	0.895259	0.439228	2.03826	0.0415244	0.372814	NOT
BNIP3L	750.874	0.383255	0.18805	2.03804	0.0415455	0.372814	NOT
ZNF222	6.24329	1.75049	0.859107	2.03757	0.041593	0.372847	UP
CXCL1	44.9746	1.18954	0.583835	2.03746	0.0416039	0.372847	UP
NME4	116.925	0.554847	0.27242	2.03673	0.0416772	0.373131	NOT
NUBPL	65.5943	0.689114	0.338365	2.0366	0.0416903	0.373131	NOT
KDM2B	96.5029	0.718878	0.353071	2.03608	0.0417427	0.373171	NOT
TSHZ1	188.091	-0.589291	0.289452	-2.03589	0.0417618	0.373171	NOT
FBXO30	254.766	-0.426442	0.209487	-2.03565	0.0417856	0.373171	NOT
PPIL4	460.213	-0.41734	0.205034	-2.03546	0.0418043	0.373171	NOT
IFI27	217.688	-0.65424	0.321473	-2.03513	0.0418374	0.373221	NOT
ZBTB45	26.9534	-0.989518	0.486328	-2.03467	0.0418839	0.373293	NOT
APOL4	88.7787	-1.05455	0.518377	-2.03432	0.0419191	0.373293	DOWN
LOC100506294	21.4576	-1.11245	0.546916	-2.03403	0.0419481	0.373293	DOWN
RCAN2	142.233	-0.540597	0.265785	-2.03397	0.0419551	0.373293	NOT
APOL1	212.056	0.661573	0.325416	2.03301	0.0420519	0.373905	NOT
CLIC2	98.7917	-0.743404	0.365715	-2.03274	0.0420787	0.373905	NOT
ST7L	80.9808	-0.70496	0.346959	-2.03183	0.0421713	0.374484	NOT
XAF1	562.962	-0.472993	0.232834	-2.03146	0.0422086	0.37457	NOT
ECH1	51.6673	0.756037	0.372309	2.03067	0.0422885	0.374899	NOT
ARHGAP19	26.7165	-1.02598	0.505272	-2.03055	0.0423006	0.374899	DOWN
ANKRD27	117.828	0.555312	0.273653	2.02925	0.0424323	0.375821	NOT
PRKAB2	317.339	-0.522012	0.257294	-2.02886	0.0424728	0.375897	NOT
MTDH	1124.07	-0.193755	0.0955173	-2.02848	0.0425114	0.375897	NOT
IKZF4	89.2041	-0.643918	0.317495	-2.02812	0.0425478	0.375897	NOT
SCD	410.201	0.508966	0.251003	2.02773	0.0425881	0.375897	NOT
LOC81691	3.98312	1.8484	0.911588	2.02767	0.042594	0.375897	UP
MLXIP	267.499	0.610491	0.301098	2.02755	0.0426064	0.375897	NOT
FASTKD3	30.5948	-1.09262	0.539086	-2.02681	0.0426821	0.376321	DOWN
CA2	13.3861	1.26901	0.626349	2.02604	0.042761	0.376674	UP
XIAP	313.567	-0.482905	0.238414	-2.02549	0.0428169	0.376674	NOT
MYL12B	1035.16	-0.351747	0.173706	-2.02496	0.0428718	0.376674	NOT
MTMR6	215.412	-0.492011	0.242982	-2.02489	0.042879	0.376674	NOT
BEND5	15.0186	1.48431	0.733087	2.02475	0.0428935	0.376674	UP
CAMK4	67.6877	-0.936495	0.462552	-2.02463	0.0429055	0.376674	NOT
PRPF6	87.2453	0.625717	0.30908	2.02445	0.0429238	0.376674	NOT
ASCC1	86.4766	0.755036	0.373092	2.02372	0.0429985	0.376674	NOT
SMAD3	214.669	0.577887	0.285588	2.0235	0.043022	0.376674	NOT
STX7	541.758	-0.383054	0.189304	-2.02349	0.0430229	0.376674	NOT
ISOC2	24.7005	1.00992	0.499105	2.02345	0.0430263	0.376674	UP
ZBTB43	42.8446	0.699098	0.345572	2.02302	0.0430711	0.376684	NOT
LRRC8D	188.823	-0.562303	0.278016	-2.02255	0.0431191	0.376684	NOT
RN7SL1	259.181	-0.488867	0.241725	-2.02241	0.0431337	0.376684	NOT
ITM2B	2353.53	-0.337764	0.16704	-2.02206	0.0431705	0.376684	NOT
GUCY1A3	813.23	-0.466099	0.230512	-2.02201	0.0431752	0.376684	NOT
SOCS4	216.49	-0.448739	0.222	-2.02135	0.043244	0.376684	NOT
PRELID2	17.2728	1.25323	0.620053	2.02117	0.0432625	0.376684	UP
LOC100131234	14.3901	1.30903	0.647704	2.02103	0.0432764	0.376684	UP
LOC641367	9.31156	1.4149	0.700219	2.02065	0.0433162	0.376684	UP
SOX30	3.16318	-1.87055	0.925742	-2.0206	0.0433213	0.376684	DOWN
ACADL	7.09891	-1.75237	0.867296	-2.0205	0.0433316	0.376684	DOWN
CD1C	25.6227	-1.2996	0.643653	-2.0191	0.0434773	0.377625	DOWN
AP2M1	477.707	0.45335	0.224551	2.01892	0.0434953	0.377625	NOT
CSNK1G2	41.4108	0.96947	0.480279	2.01856	0.0435334	0.377714	NOT
SPTLC1	231.257	0.426889	0.211581	2.01762	0.0436312	0.377983	NOT
FCRL5	42.0106	-1.49701	0.742068	-2.01735	0.0436592	0.377983	DOWN
BTBD19	22.0907	1.09451	0.542643	2.017	0.0436955	0.377983	UP
SECISBP2L	480.948	0.353499	0.175262	2.01698	0.0436978	0.377983	NOT
CLDN4	79.3946	1.1181	0.554463	2.01654	0.043744	0.377983	UP
DGCR2	71.8194	0.780827	0.387323	2.01596	0.0438041	0.377983	NOT
MAP3K13	112.264	0.658278	0.326541	2.01591	0.0438093	0.377983	NOT
P2RY10	43.675	-1.04621	0.518981	-2.0159	0.0438109	0.377983	DOWN
STRADA	35.6275	0.949035	0.470826	2.01568	0.043833	0.377983	NOT
AK2	238.329	0.480242	0.238286	2.0154	0.0438625	0.377983	NOT
MUL1	32.804	0.876761	0.435106	2.01505	0.0438991	0.377983	NOT
P2RY1	20.3982	-1.18991	0.590533	-2.01497	0.043908	0.377983	DOWN
SGTA	62.5079	0.769242	0.381817	2.01469	0.0439372	0.377983	NOT
EXOSC7	23.1325	0.993835	0.493331	2.01454	0.0439528	0.377983	NOT
UTP23	88.4702	-0.59048	0.293192	-2.01397	0.044013	0.378262	NOT
GOLPH3L	250.247	-0.473316	0.235074	-2.01348	0.0440645	0.378466	NOT
ABTB2	28.5798	1.11023	0.551506	2.01309	0.0441049	0.378486	UP
WDR55	36.7061	0.7879	0.391505	2.01249	0.044168	0.378486	NOT
FLJ14186	8.22111	1.65564	0.822814	2.01217	0.0442018	0.378486	UP
LMO2	114.387	-0.932449	0.463428	-2.01207	0.0442129	0.378486	NOT
RSRC2	361.095	0.315075	0.15661	2.01185	0.0442361	0.378486	NOT
PTPN1	168.964	0.530986	0.263944	2.01174	0.0442476	0.378486	NOT
ZWILCH	65.7482	0.783231	0.389411	2.01132	0.0442915	0.378486	NOT
LINC00342	21.6885	1.28852	0.640655	2.01125	0.0442988	0.378486	UP
LPPR4	154.662	-0.793856	0.394749	-2.01104	0.0443209	0.378486	NOT
TIGD1	18.31	1.24752	0.620406	2.01082	0.0443448	0.378486	UP
AHSA1	102.616	0.447795	0.222772	2.0101	0.0444202	0.378668	NOT
SLC25A20	14.1264	1.36512	0.679218	2.00984	0.0444483	0.378668	UP
NDRG1	451.277	0.48135	0.239498	2.00983	0.0444494	0.378668	NOT
ATP1A1	1086.34	0.520606	0.259124	2.0091	0.0445265	0.379088	NOT
TMEM185B	182.383	0.58617	0.291825	2.00863	0.044576	0.379272	NOT
C9orf5	513.809	-0.301183	0.150011	-2.00774	0.0446708	0.379841	NOT
GJC1	125.071	0.632788	0.315257	2.00721	0.044727	0.380081	NOT
ROBO2	96.6852	-0.874285	0.435666	-2.00678	0.0447734	0.380185	NOT
PMM2	56.824	0.887077	0.442085	2.00657	0.044795	0.380185	NOT
ANGEL2	106.927	-0.526903	0.262695	-2.00576	0.0448822	0.380689	NOT
DUSP19	54.0863	-0.849905	0.423817	-2.00536	0.0449247	0.380811	NOT
FHIT	13.2072	1.17607	0.586714	2.00451	0.0450155	0.381226	UP
ZNF620	7.83564	1.9544	0.975066	2.00438	0.0450295	0.381226	UP
TNFRSF10D	22.5266	1.23759	0.617672	2.00363	0.0451095	0.381552	UP
PLCD1	14.6886	-1.11833	0.55819	-2.0035	0.0451241	0.381552	DOWN
LOC654433	34.8641	1.31671	0.657422	2.00284	0.0451944	0.38191	UP
IMPDH1	21.3801	1.00853	0.503767	2.00198	0.0452864	0.382214	UP
SCOC	70.8742	-0.47479	0.237165	-2.00194	0.0452912	0.382214	NOT
PLEKHG3	25.5453	1.10281	0.550929	2.00172	0.0453146	0.382214	UP
C10orf81	13.2376	1.35043	0.674998	2.00065	0.0454306	0.382955	UP
MET	373.004	0.867362	0.433739	1.99973	0.0455292	0.38325	NOT
FBP1	34.0415	1.1331	0.566731	1.99936	0.045569	0.38325	UP
FASTKD5	27.0574	0.950221	0.475291	1.99924	0.0455823	0.38325	NOT
RGS10	42.7613	-0.822701	0.411535	-1.99911	0.045597	0.38325	NOT
RPLP0P2	18.037	-0.926235	0.463354	-1.99898	0.0456105	0.38325	NOT
IPMK	110.036	0.483865	0.242165	1.99808	0.0457079	0.38325	NOT
POLR3H	32.9167	-0.88715	0.444017	-1.99801	0.0457156	0.38325	NOT
RDH10	260.2	-0.694742	0.347761	-1.99776	0.045743	0.38325	NOT
HERC1	567.907	-0.298709	0.149525	-1.99772	0.0457466	0.38325	NOT
DHRS9	38.9046	1.39674	0.699212	1.99759	0.0457613	0.38325	UP
FOXF1	166.936	0.684212	0.342572	1.99728	0.0457946	0.38325	NOT
ABCA9	131.983	-0.821603	0.411436	-1.99692	0.0458344	0.38325	NOT
LOC100506385	16.7921	-1.29979	0.650916	-1.99686	0.04584	0.38325	DOWN
ZNF808	74.5811	-0.739056	0.370276	-1.99596	0.0459384	0.38325	NOT
FGF14	101.526	-0.715195	0.35837	-1.99569	0.0459678	0.38325	NOT
ZNF70	42.3509	-0.858098	0.430005	-1.99555	0.0459829	0.38325	NOT
ZNF876P	32.6686	1.0744	0.538493	1.99519	0.046022	0.38325	UP
FAM35A	66.3597	-0.583291	0.292366	-1.99507	0.0460349	0.38325	NOT
RREB1	185.187	0.46466	0.232927	1.99487	0.0460571	0.38325	NOT
HOXA2	22.9705	-1.15618	0.579622	-1.99472	0.0460736	0.38325	DOWN
SHROOM3	101.263	0.746914	0.374502	1.99442	0.0461063	0.38325	NOT
PTPLB	205.576	0.710547	0.35627	1.99441	0.0461078	0.38325	NOT
ZNF259	114.442	0.685257	0.343598	1.99436	0.0461132	0.38325	NOT
LOC440335	4.03738	2.10212	1.05417	1.9941	0.0461408	0.38325	UP
AFF1	1398.56	0.256907	0.128866	1.9936	0.0461962	0.383476	NOT
CADPS2	257.806	-0.49826	0.25005	-1.99264	0.0463009	0.383742	NOT
ZNF32	27.0509	-1.02519	0.514511	-1.99255	0.0463107	0.383742	DOWN
GALNTL2	53.2619	1.05085	0.527428	1.9924	0.0463274	0.383742	UP
TBX2	40.7031	0.844119	0.423712	1.9922	0.0463492	0.383742	NOT
CACNA1H	55.8695	0.943644	0.473712	1.99202	0.046369	0.383742	NOT
MMP11	705.342	0.668778	0.335812	1.99152	0.0464234	0.383958	NOT
HSPB7	23.62	-1.03964	0.522147	-1.99108	0.0464722	0.384129	DOWN
FAM190B	1071.79	-0.401165	0.201522	-1.99068	0.0465162	0.384259	NOT
SYDE1	71.5673	0.709371	0.356423	1.99025	0.046563	0.384413	NOT
CELSR3	4.73081	1.82621	0.917914	1.98952	0.0466441	0.384727	UP
RP9	15.8715	0.948957	0.477191	1.98863	0.0467418	0.384727	NOT
TAF4B	46.4707	0.786386	0.395494	1.98836	0.0467714	0.384727	NOT
AHNAK2	674.999	0.520318	0.261769	1.9877	0.046845	0.384727	NOT
DSCR3	159.452	-0.588797	0.296232	-1.98762	0.0468534	0.384727	NOT
PDHX	130.37	0.633339	0.318673	1.98743	0.0468752	0.384727	NOT
LMBR1L	21.6432	-1.08606	0.546474	-1.98739	0.0468792	0.384727	DOWN
PDDC1	9.13758	1.26038	0.634254	1.98719	0.0469014	0.384727	UP
CCDC94	8.00759	1.20297	0.605362	1.98719	0.0469018	0.384727	UP
C11orf54	60.2215	-0.805028	0.405149	-1.98699	0.0469233	0.384727	NOT
GAS7	599.178	0.477391	0.240288	1.98674	0.0469509	0.384727	NOT
ANKRD64	5.53348	1.35091	0.680062	1.98646	0.0469826	0.384727	UP
IGSF3	32.3642	1.01247	0.509766	1.98614	0.0470175	0.384727	UP
CEACAM7	11.3231	1.82171	0.917328	1.98589	0.0470454	0.384727	UP
DPM2	27.4153	0.986503	0.496766	1.98585	0.0470502	0.384727	NOT
DHRS7B	48.3428	0.776258	0.3909	1.98582	0.0470529	0.384727	NOT
EBP	14.487	1.1576	0.583235	1.98479	0.0471678	0.38506	UP
TTC30B	16.7433	-1.23351	0.621668	-1.98419	0.047235	0.38506	DOWN
RAB25	59.6697	1.17804	0.593762	1.98403	0.0472527	0.38506	UP
ARSI	8.29402	1.49775	0.75507	1.98359	0.0473014	0.38506	UP
CCDC69	95.502	0.957098	0.482571	1.98333	0.0473303	0.38506	NOT
IK	179.841	0.552862	0.278787	1.9831	0.0473562	0.38506	NOT
SCARF2	109.144	-0.80062	0.40374	-1.98301	0.0473666	0.38506	NOT
SLC1A3	146.144	-0.633533	0.319481	-1.983	0.0473669	0.38506	NOT
ARRDC3	1180.46	0.400177	0.201808	1.98296	0.047372	0.38506	NOT
CDKL3	5.20187	1.5018	0.75737	1.98292	0.0473763	0.38506	UP
FBXL3	259.338	-0.399341	0.201444	-1.9824	0.047435	0.385307	NOT
GPR4	38.7886	0.944328	0.476424	1.98212	0.0474662	0.385331	NOT
MZB1	21.2311	-1.53039	0.772213	-1.98182	0.0474994	0.38537	DOWN
NDUFS3	93.1053	-0.668481	0.337424	-1.98113	0.0475764	0.385765	NOT
CXorf69	43.0417	-0.747362	0.377535	-1.97958	0.0477503	0.386525	NOT
ANO5	9.22347	-1.44743	0.731341	-1.97915	0.0477988	0.386525	DOWN
MMP14	805.754	0.44001	0.222345	1.97895	0.0478211	0.386525	NOT
B3GALNT1	71.2915	0.638254	0.322569	1.97866	0.0478546	0.386525	NOT
FAM83B	46.2687	1.30526	0.659681	1.97862	0.0478587	0.386525	UP
C4orf14	75.1018	-0.764936	0.386613	-1.97856	0.047866	0.386525	NOT
MGC27345	59.5979	1.01051	0.510761	1.97845	0.0478782	0.386525	UP
ARHGAP1	625.139	0.397195	0.200778	1.97828	0.0478971	0.386525	NOT
ECD	135.001	0.443146	0.224158	1.97694	0.0480486	0.386881	NOT
SCP2	518.425	-0.388682	0.196625	-1.97677	0.0480674	0.386881	NOT
COL27A1	30.9593	1.09251	0.552679	1.97676	0.0480689	0.386881	UP
UHRF1BP1	147.092	-0.501703	0.253829	-1.97654	0.0480935	0.386881	NOT
FAM113A	16.7402	0.94798	0.479675	1.9763	0.0481213	0.386881	NOT
SLC25A16	98.6858	0.781637	0.395575	1.97595	0.0481605	0.386881	NOT
PFDN6	3.54035	1.39776	0.707402	1.9759	0.048166	0.386881	UP
DNAJC12	5.77846	1.81119	0.91665	1.97588	0.0481684	0.386881	UP
WDR72	24.8812	1.4163	0.71693	1.97551	0.0482107	0.386992	UP
MMP13	37.4791	1.71317	0.867634	1.97453	0.0483219	0.387458	UP
BHLHE22	21.7063	-0.98287	0.497783	-1.97449	0.0483256	0.387458	NOT
PNKD	127.646	0.65275	0.330744	1.97358	0.0484297	0.388064	NOT
UROD	82.6646	-0.649442	0.329295	-1.97222	0.0485849	0.388861	NOT
ARHGAP35	608.459	0.339631	0.172228	1.97198	0.0486115	0.388861	NOT
SAC3D1	6.02302	1.4411	0.73082	1.97189	0.048622	0.388861	UP
THEMIS	29.2683	-1.15654	0.586571	-1.9717	0.0486433	0.388861	DOWN
POLG	38.7422	0.881775	0.447429	1.97076	0.0487513	0.389496	NOT
VRK1	49.1041	0.820224	0.416609	1.96881	0.0489749	0.390674	NOT
DUOX2	77.8802	1.55946	0.792086	1.9688	0.048976	0.390674	UP
ARMC10	77.8264	-0.484309	0.246002	-1.96872	0.0489849	0.390674	NOT
ARHGEF40	94.8312	0.610239	0.310212	1.96717	0.0491641	0.391527	NOT
ARMC6	5.85286	1.59166	0.809232	1.96688	0.049197	0.391527	UP
MAP1S	27.2884	0.998573	0.507703	1.96685	0.0492009	0.391527	NOT
WBP11	304.44	-0.445373	0.226446	-1.9668	0.0492067	0.391527	NOT
TMEM135	111.464	-0.60514	0.307743	-1.96638	0.0492545	0.391667	NOT
MAGOH	9.87901	1.00898	0.513209	1.96603	0.0492951	0.391667	UP
IARS2	219.603	0.441943	0.224805	1.9659	0.0493106	0.391667	NOT
DSC2	175.093	0.593286	0.301996	1.96455	0.0494666	0.392677	NOT
PTPRM	387.277	0.450015	0.229127	1.96404	0.0495252	0.392913	NOT
SCN9A	51.3117	-0.679129	0.345919	-1.96326	0.0496162	0.393406	NOT
LOC100130691	25.7686	-1.34783	0.686634	-1.96295	0.049652	0.393461	DOWN
CELF2	425.306	-0.496922	0.253294	-1.96184	0.0497815	0.394258	NOT
NUP214	397.001	0.416573	0.212375	1.9615	0.0498207	0.394339	NOT
SDR16C5	12.3312	1.44823	0.738762	1.96034	0.049956	0.39518	UP
JHDM1D	404.225	0.521597	0.266277	1.95885	0.0501305	0.396221	NOT
CLIP1	1291.58	-0.31782	0.162259	-1.95872	0.0501458	0.396221	NOT
FBXO31	29.8571	-0.80821	0.412717	-1.95827	0.0501985	0.396408	NOT
SUMF2	144.043	0.57019	0.291311	1.95732	0.0503096	0.397055	NOT
CDK12	570.253	0.406951	0.207981	1.95667	0.0503861	0.397429	NOT
HMGN2	75.0964	-0.595843	0.304598	-1.95616	0.0504457	0.397669	NOT
ATL1	94.9784	-0.586041	0.299637	-1.95584	0.0504846	0.397745	NOT
O3FAR1	2.96561	-2.01595	1.03138	-1.95461	0.0506293	0.398655	NOT
SERPINB5	51.3303	1.02307	0.523495	1.95431	0.0506649	0.398704	NOT
ZNF200	25.8499	0.955534	0.48919	1.9533	0.0507843	0.399413	NOT
RGS7BP	87.7042	-0.909306	0.46575	-1.95235	0.0508972	0.40007	NOT
MRPS17	16.7604	1.2564	0.643949	1.95109	0.0510464	0.400852	NOT
MAN2B1	129.744	-0.530387	0.271852	-1.95101	0.0510555	0.400852	NOT
ING1	24.3659	-0.997863	0.511594	-1.9505	0.0511169	0.401103	NOT
LCP2	283.636	-0.491927	0.252297	-1.94979	0.0512008	0.40153	NOT
KAT6B	269.16	0.450777	0.231371	1.94829	0.0513807	0.402419	NOT
MGST3	320.631	-0.39308	0.201791	-1.94796	0.05142	0.402419	NOT
TXLNG	132.427	0.565363	0.290251	1.94784	0.051434	0.402419	NOT
KIAA1731	197.978	0.559081	0.287138	1.94708	0.0515254	0.402419	NOT
CLDND1	421.664	0.392522	0.201629	1.94675	0.0515641	0.402419	NOT
B3GNT7	23.0715	-1.13314	0.582072	-1.94674	0.0515662	0.402419	NOT
ERLIN2	281.714	-0.366368	0.188202	-1.94668	0.0515731	0.402419	NOT
MSN	2206.17	0.231652	0.119009	1.9465	0.0515947	0.402419	NOT
ATP11C	247.628	-0.433572	0.222756	-1.94639	0.0516074	0.402419	NOT
DEAF1	36.9768	-1.03022	0.529336	-1.94626	0.0516241	0.402419	NOT
OAS2	464.892	-0.58278	0.299456	-1.94613	0.0516391	0.402419	NOT
MAGT1	182.019	0.449249	0.230913	1.94553	0.0517108	0.402523	NOT
MED26	25.0398	0.881071	0.45287	1.94553	0.0517116	0.402523	NOT
GATAD1	109.283	0.519371	0.267004	1.94518	0.0517529	0.402614	NOT
ORAOV1	5.78652	1.46622	0.753882	1.94489	0.0517883	0.40266	NOT
HDGF	254.669	0.414272	0.21316	1.94347	0.0519588	0.403755	NOT
MICALCL	10.0741	1.62203	0.835171	1.94216	0.0521179	0.40476	NOT
LDHA	2770.69	0.320352	0.165012	1.94139	0.0522114	0.405255	NOT
CCDC144C	22.3323	0.785034	0.40442	1.94113	0.052242	0.405262	NOT
MTHFD2L	15.6326	1.16348	0.599504	1.94074	0.0522894	0.405391	NOT
CYP51A1	199.104	0.48768	0.251316	1.94051	0.0523181	0.405391	NOT
COQ10B	154.68	0.40668	0.20965	1.93981	0.052403	0.405445	NOT
MAP3K3	105.768	0.71654	0.36943	1.93958	0.0524303	0.405445	NOT
ZNF217	484.797	0.37655	0.194157	1.93941	0.052452	0.405445	NOT
QSER1	938.795	-0.306835	0.158254	-1.93888	0.0525165	0.405445	NOT
HERC2	171.993	0.463027	0.238817	1.93884	0.0525208	0.405445	NOT
C4orf34	132.221	-0.443047	0.228521	-1.93876	0.0525311	0.405445	NOT
MPP6	66.6545	-0.825219	0.425724	-1.93839	0.0525757	0.405445	NOT
KLF4	47.7754	0.910719	0.469842	1.93835	0.0525804	0.405445	NOT
HMG20A	184.667	-0.506747	0.261452	-1.9382	0.0525991	0.405445	NOT
RYR2	94.4535	0.839623	0.433241	1.938	0.0526227	0.405445	NOT
BST2	99.7256	-0.539374	0.278517	-1.93659	0.0527953	0.406545	NOT
ZNF167	52.8175	1.09354	0.564797	1.93616	0.0528483	0.406723	NOT
HIST1H2AL	49.7402	-0.665536	0.343874	-1.93541	0.0529405	0.407202	NOT
TMEM127	360.303	0.362466	0.187327	1.93494	0.0529978	0.407266	NOT
HIST1H2AK	5.19344	-1.32748	0.686087	-1.93485	0.0530086	0.407266	NOT
SYNJ2	255.759	0.43433	0.224657	1.93331	0.0531985	0.407952	NOT
P4HA2	142.642	0.596609	0.308621	1.93315	0.0532179	0.407952	NOT
LRRC4C	48.2407	-0.878872	0.454633	-1.93315	0.0532179	0.407952	NOT
CMIP	174.377	0.472051	0.244214	1.93294	0.053244	0.407952	NOT
PRKCI	593.057	-0.391573	0.202583	-1.93291	0.0532477	0.407952	NOT
SMS	93.2184	0.453292	0.23455	1.9326	0.0532854	0.408012	NOT
CD3E	76.56	-1.01251	0.524208	-1.9315	0.0534218	0.40864	NOT
UTP18	39.43	0.671877	0.347862	1.93145	0.0534274	0.40864	NOT
LOC100505899	3.70103	2.08875	1.08183	1.93075	0.0535135	0.40896	NOT
EIF4EBP1	17.8941	1.07259	0.555568	1.93063	0.0535292	0.40896	NOT
CCDC85C	11.31	1.29434	0.670668	1.92993	0.0536159	0.409372	NOT
PRRT3	6.9773	1.57513	0.81637	1.92943	0.0536777	0.409372	NOT
LOC730101	18.6058	-1.43017	0.74129	-1.9293	0.0536934	0.409372	NOT
SNX10	78.2832	-0.509647	0.264206	-1.92898	0.0537334	0.409372	NOT
PAQR5	48.643	0.918433	0.476124	1.92898	0.0537334	0.409372	NOT
BRCA1	48.7229	0.830262	0.430473	1.92872	0.0537657	0.409389	NOT
VSTM4	201.815	0.530914	0.275384	1.9279	0.0538673	0.409933	NOT
NSRP1	322.174	0.406097	0.210728	1.92712	0.053965	0.410417	NOT
C4orf43	47.0081	0.643751	0.334111	1.92676	0.05401	0.410417	NOT
CD36	142.647	1.06652	0.553559	1.92666	0.0540221	0.410417	NOT
MRS2P2	11.2987	-1.33039	0.690632	-1.92634	0.0540616	0.410417	NOT
LAD1	76.057	1.03367	0.536642	1.92618	0.0540816	0.410417	NOT
PPP6R1	63.1786	0.78664	0.40856	1.9254	0.0541796	0.410932	NOT
PRNP	313.548	-0.394678	0.205019	-1.92508	0.054219	0.411003	NOT
IFNGR1	389.995	-0.41631	0.216388	-1.92391	0.0543662	0.41177	NOT
FXN	24.3776	0.948319	0.492946	1.92378	0.0543821	0.41177	NOT
BTN3A3	98.1135	-0.622094	0.323409	-1.92355	0.054411	0.41177	NOT
HNRNPH3	434.387	0.295936	0.153871	1.92327	0.0544461	0.411807	NOT
C10orf108	13.8558	1.39342	0.724662	1.92286	0.054498	0.411971	NOT
SRRM2	1892.35	0.31905	0.16601	1.92188	0.0546212	0.412551	NOT
NUCKS1	2562.79	-0.213248	0.110987	-1.92138	0.0546836	0.412551	NOT
TP53	157.892	-0.502585	0.26161	-1.92112	0.0547161	0.412551	NOT
SEMA7A	30.6493	0.894278	0.465498	1.92112	0.0547167	0.412551	NOT
DIRC2	122.384	0.607823	0.316402	1.92104	0.0547261	0.412551	NOT
ZCCHC2	132.72	-0.4817	0.251023	-1.91894	0.0549916	0.414323	NOT
ZNF689	10.2352	-1.04411	0.544702	-1.91685	0.0552566	0.415455	NOT
C3AR1	168.518	-0.639267	0.333505	-1.91681	0.0552615	0.415455	NOT
LOC338758	8.38453	-1.32049	0.688929	-1.91673	0.0552717	0.415455	NOT
IFI44	114.42	-0.57041	0.297602	-1.91669	0.0552775	0.415455	NOT
OSCAR	15.6085	1.2975	0.677116	1.91622	0.0553375	0.415455	NOT
DCLK2	68.6888	0.649884	0.339205	1.9159	0.0553773	0.415455	NOT
PRPF40B	11.5003	1.11853	0.583817	1.91588	0.0553798	0.415455	NOT
PRDM6	52.0807	-0.733338	0.382777	-1.91584	0.0553859	0.415455	NOT
HIST1H1D	122.037	-0.648916	0.338947	-1.91451	0.0555554	0.416497	NOT
SNRPG	21.1172	0.686969	0.359007	1.91353	0.0556808	0.416808	NOT
INF2	59.9717	0.769933	0.402382	1.91344	0.0556918	0.416808	NOT
SYTL3	22.3747	1.19764	0.626035	1.91306	0.0557403	0.416808	NOT
AP1M2	6.02722	1.98646	1.03839	1.91301	0.0557469	0.416808	NOT
TOM1L2	38.1074	0.772886	0.404117	1.91253	0.0558079	0.416808	NOT
ACOT2	5.88988	1.05395	0.551153	1.91227	0.0558421	0.416808	NOT
PCLO	37.0082	1.25461	0.656291	1.91167	0.055919	0.416808	NOT
DDA1	27.0836	0.80557	0.421414	1.91159	0.0559294	0.416808	NOT
KIAA0895	14.1172	1.1126	0.582071	1.91144	0.0559475	0.416808	NOT
GOLGA8B	24.1013	1.12534	0.588856	1.91106	0.0559969	0.416808	NOT
NEK2	10.6213	1.66652	0.872092	1.91094	0.0560117	0.416808	NOT
GRIK1	9.56635	-1.21314	0.634857	-1.91088	0.0560195	0.416808	NOT
KRTCAP2	83.4037	0.578587	0.302833	1.91058	0.0560584	0.416808	NOT
C15orf44	66.9982	0.594897	0.311395	1.91042	0.0560785	0.416808	NOT
C13orf33	93.4417	0.915793	0.479489	1.90993	0.0561416	0.416808	NOT
HSD17B7	15.5311	1.20264	0.629839	1.90944	0.0562052	0.416808	NOT
FGR	28.048	0.989605	0.518318	1.90926	0.0562283	0.416808	NOT
CHCHD1	26.5961	0.706714	0.370182	1.9091	0.0562491	0.416808	NOT
AKT1S1	32.7389	0.895362	0.469136	1.90853	0.0563222	0.416808	NOT
E2F8	15.2918	1.50724	0.789736	1.90853	0.0563223	0.416808	NOT
VPS72	46.0201	-0.766356	0.401606	-1.90823	0.0563618	0.416808	NOT
NAA15	419.534	0.400181	0.209724	1.90813	0.056374	0.416808	NOT
NCOA1	717.986	-0.340481	0.178441	-1.90809	0.0563798	0.416808	NOT
MIB1	781.921	-0.241716	0.126684	-1.90802	0.0563884	0.416808	NOT
PLAC9	15.0832	-1.145	0.600316	-1.90732	0.0564786	0.416808	NOT
BYSL	8.66467	-1.37762	0.72237	-1.90708	0.0565107	0.416808	NOT
C17orf51	55.4637	0.837922	0.439377	1.90707	0.056512	0.416808	NOT
TDRD6	33.3031	-0.894736	0.469213	-1.90689	0.0565353	0.416808	NOT
PCDHB2	35.8046	-0.967722	0.507496	-1.90686	0.0565393	0.416808	NOT
SMARCA5	927.46	-0.311346	0.163296	-1.90664	0.0565669	0.416808	NOT
DNAJC15	413.269	-0.45487	0.23858	-1.90657	0.0565758	0.416808	NOT
C19orf25	3.22716	-1.92381	1.0093	-1.90608	0.0566401	0.416808	NOT
DR1	143.832	-0.350561	0.18394	-1.90584	0.056671	0.416808	NOT
WDHD1	109.969	0.663133	0.347984	1.90564	0.0566963	0.416808	NOT
PCDHB15	41.7307	-1.04552	0.548644	-1.90564	0.056697	0.416808	NOT
NTAN1	204.773	-0.589451	0.309321	-1.90563	0.0566984	0.416808	NOT
DNM1L	367.317	0.392453	0.206138	1.90384	0.0569313	0.418295	NOT
HEATR1	207.048	0.403693	0.21212	1.90314	0.0570226	0.418519	NOT
TMEM134	10.5564	1.18973	0.625141	1.90313	0.0570232	0.418519	NOT
ZNF12	276.483	0.379244	0.199384	1.90207	0.0571614	0.419307	NOT
MAGOHB	34.8771	0.837312	0.440318	1.90161	0.0572222	0.419319	NOT
PTGR2	40.8203	-0.837733	0.440573	-1.90146	0.0572417	0.419319	NOT
BAG2	145.266	0.532886	0.280267	1.90136	0.0572555	0.419319	NOT
BET1L	288.67	0.498229	0.262083	1.90104	0.0572974	0.419401	NOT
PCDHAC1	6.72357	1.87419	0.987265	1.89837	0.0576474	0.421402	NOT
C1QB	174.976	-0.615315	0.324175	-1.8981	0.0576833	0.421402	NOT
CHRAC1	227.589	0.533112	0.280878	1.89802	0.0576936	0.421402	NOT
DHRS3	214.135	-0.635512	0.334831	-1.89801	0.0576945	0.421402	NOT
IQSEC3	11.2909	1.30231	0.686236	1.89775	0.0577288	0.421422	NOT
RPS27	74.36	-0.403166	0.212472	-1.8975	0.0577615	0.421422	NOT
PNMA2	145.252	-0.518643	0.273361	-1.89729	0.0577901	0.421422	NOT
CALCRL	468.572	-0.4934	0.260118	-1.89683	0.0578501	0.421634	NOT
TNFAIP1	171.601	0.41212	0.217306	1.89649	0.0578951	0.421736	NOT
SYTL4	354.93	0.455113	0.240017	1.89617	0.0579372	0.421817	NOT
CHMP2A	158.78	0.409383	0.215972	1.89554	0.0580213	0.422049	NOT
SSC5D	386.747	0.664489	0.350568	1.89546	0.058031	0.422049	NOT
NOTCH2NL	175.031	0.435307	0.229759	1.89462	0.0581426	0.42219	NOT
ELP4	90.7315	-0.610621	0.322354	-1.89425	0.0581914	0.42219	NOT
SH3BP4	579.23	0.343331	0.181256	1.89417	0.058202	0.42219	NOT
HDAC7	87.3206	0.599262	0.316376	1.89415	0.0582056	0.42219	NOT
USP27X	23.8262	1.08563	0.57321	1.89395	0.058231	0.42219	NOT
BTG1	294.964	0.508962	0.268736	1.89391	0.0582364	0.42219	NOT
ARID5A	13.5691	1.05435	0.55716	1.89237	0.0584417	0.423453	NOT
PPIA	413.832	0.293699	0.155271	1.89153	0.0585542	0.423879	NOT
CREBZF	196.146	0.475779	0.251541	1.89146	0.0585627	0.423879	NOT
AIG1	103.064	0.5581	0.295156	1.89086	0.058643	0.424047	NOT
MR1	147.834	-0.520985	0.275609	-1.89031	0.0587167	0.424047	NOT
GABARAPL2	226.187	0.447359	0.23667	1.89022	0.0587279	0.424047	NOT
HGF	182.038	-0.625676	0.331023	-1.89013	0.0587404	0.424047	NOT
ARNT2	51.329	0.83046	0.43938	1.89007	0.058748	0.424047	NOT
SARS	166.523	0.375992	0.198949	1.88989	0.0587726	0.424047	NOT
CNOT8	151.242	0.528009	0.279481	1.88925	0.0588588	0.424065	NOT
HNRNPA1	411.374	0.325697	0.172408	1.88911	0.0588774	0.424065	NOT
PAX8	8.90421	1.35211	0.715787	1.88899	0.0588934	0.424065	NOT
LOC100505806	28.246	0.972244	0.514703	1.88894	0.0588996	0.424065	NOT
SFT2D1	44.0461	-0.860117	0.455523	-1.8882	0.0589994	0.424559	NOT
C19orf10	76.2984	0.600254	0.317986	1.88768	0.0590696	0.424839	NOT
RGS22	30.8101	-0.987741	0.523447	-1.88699	0.0591612	0.425274	NOT
VAT1L	30.2484	1.31268	0.695766	1.88667	0.0592052	0.425278	NOT
BCL11B	41.4224	-1.02381	0.542728	-1.88642	0.0592379	0.425278	NOT
SON	1474.96	0.232841	0.123446	1.88618	0.0592708	0.425278	NOT
SDHAP1	7.9871	0.982363	0.520854	1.88606	0.0592866	0.425278	NOT
ENAH	942.688	0.385072	0.204206	1.8857	0.0593349	0.4254	NOT
HK1	129.16	0.484928	0.257277	1.88485	0.0594506	0.426006	NOT
MARVELD2	28.1908	1.18593	0.62947	1.88402	0.0595627	0.426372	NOT
RNF167	85.4943	0.736513	0.390975	1.88379	0.0595938	0.426372	NOT
NR2F6	26.1488	0.875068	0.464599	1.88349	0.0596336	0.426372	NOT
MUC20	22.7565	1.12117	0.595369	1.88314	0.0596808	0.426372	NOT
RNASET2	61.7798	0.75492	0.40104	1.88241	0.0597808	0.426372	NOT
LOC653653	17.2616	-0.825762	0.438737	-1.88213	0.0598181	0.426372	NOT
TTC28-AS1	10.1333	1.29056	0.685689	1.88213	0.0598184	0.426372	NOT
HLCS	145.412	0.509162	0.270544	1.88199	0.0598375	0.426372	NOT
SLC2A8	7.13539	-1.54461	0.820782	-1.88187	0.0598532	0.426372	NOT
CYP2S1	35.4456	-0.964387	0.512501	-1.88173	0.0598733	0.426372	NOT
PYCR2	34.9892	0.66093	0.351246	1.88167	0.0598809	0.426372	NOT
PDZD11	121.888	-0.479775	0.254974	-1.88166	0.0598815	0.426372	NOT
LYPD5	9.20917	1.73401	0.921628	1.88146	0.0599087	0.426372	NOT
ZNF569	48.0676	-0.717099	0.381223	-1.88105	0.0599652	0.426552	NOT
NSUN7	6.81769	1.31383	0.698774	1.8802	0.0600812	0.427042	NOT
INTS1	118.245	-0.718399	0.382132	-1.87998	0.0601111	0.427042	NOT
SASH1	400.204	-0.439146	0.233607	-1.87985	0.0601283	0.427042	NOT
TREM2	38.1745	0.922809	0.491031	1.87933	0.0601993	0.427244	NOT
CARD6	194.762	-0.549507	0.29245	-1.87898	0.0602478	0.427244	NOT
BAHD1	31.6853	0.875992	0.466228	1.87889	0.0602595	0.427244	NOT
ULK4	33.6082	-0.844125	0.449307	-1.87872	0.0602821	0.427244	NOT
FAM48A	385.479	0.525224	0.279622	1.87833	0.0603354	0.427254	NOT
C8orf37	40.8373	-0.688669	0.366654	-1.87826	0.0603462	0.427254	NOT
ANKRD29	14.0489	-1.37032	0.72982	-1.87761	0.0604342	0.427459	NOT
C1orf133	12.6116	1.20432	0.641444	1.87751	0.0604487	0.427459	NOT
ADCK2	18.2039	1.03157	0.549544	1.87713	0.0605002	0.427459	NOT
IQCK	45.0481	-0.760354	0.405063	-1.87713	0.0605008	0.427459	NOT
ZIK1	23.5778	-0.994021	0.529645	-1.87677	0.06055	0.427585	NOT
PRKAR2B	57.6362	-0.700197	0.373162	-1.87639	0.0606022	0.427649	NOT
IKZF3	61.9154	-1.05078	0.560046	-1.87624	0.0606221	0.427649	NOT
CLCF1	20.6109	1.32563	0.706618	1.87602	0.0606532	0.427649	NOT
C19orf21	4.80018	1.91038	1.01856	1.87557	0.0607145	0.42786	NOT
NDUFA4	200.166	-0.396057	0.211277	-1.87459	0.0608492	0.428498	NOT
KIAA1328	84.945	0.636058	0.33933	1.87445	0.060868	0.428498	NOT
PGRMC1	5.66691	-1.23957	0.661819	-1.87297	0.0610727	0.429717	NOT
ANKRD17	1492.91	0.29943	0.159898	1.87264	0.0611185	0.429794	NOT
H6PD	243.129	0.428782	0.228997	1.87243	0.0611468	0.429794	NOT
ADH1B	170.195	-1.10659	0.591122	-1.87201	0.0612052	0.4298	NOT
ANO10	67.2785	0.519011	0.277326	1.87149	0.0612779	0.4298	NOT
COPE	53.9325	0.841718	0.44976	1.87148	0.0612782	0.4298	NOT
KIFC3	24.8964	0.905569	0.483895	1.87142	0.0612871	0.4298	NOT
ATP1A1OS	3.48795	1.83328	0.979756	1.87116	0.0613225	0.4298	NOT
RBM25	800.609	0.355744	0.19013	1.87106	0.061337	0.4298	NOT
SNF8	57.3763	0.721344	0.385659	1.87042	0.0614258	0.430202	NOT
ARID1B	414.6	-0.423273	0.226327	-1.87018	0.0614585	0.430209	NOT
DDX21	361.481	0.40036	0.214108	1.8699	0.0614983	0.430267	NOT
KLK7	42.0095	1.66233	0.889103	1.86967	0.06153	0.430268	NOT
LYPD3	6.98757	2.15074	1.15059	1.86925	0.061588	0.430453	NOT
PSPH	9.61704	0.910299	0.487288	1.86809	0.0617491	0.430922	NOT
MRPL43	37.746	-0.726199	0.388759	-1.86799	0.0617632	0.430922	NOT
MRC1	41.7885	-0.725242	0.38827	-1.86788	0.061779	0.430922	NOT
TMEM14A	133.541	0.492312	0.26357	1.86786	0.0617817	0.430922	NOT
PSMD8	132.636	0.37196	0.199311	1.86623	0.0620092	0.432191	NOT
ALOX5	123.342	-0.653432	0.350159	-1.8661	0.0620272	0.432191	NOT
FGF9	38.3388	-1.04866	0.562187	-1.86532	0.0621367	0.432584	NOT
STAU2	263.137	0.408099	0.218801	1.86516	0.0621594	0.432584	NOT
PDE5A	366.565	-0.336032	0.180196	-1.86481	0.0622074	0.432584	NOT
GSTO2	6.60939	1.74658	0.936749	1.86452	0.0622494	0.432584	NOT
HIST1H2BN	3.80227	-1.36824	0.733897	-1.86435	0.0622733	0.432584	NOT
SLC38A5	24.2865	1.1324	0.607471	1.86412	0.0623049	0.432584	NOT
SGSM2	16.3554	-0.969264	0.519986	-1.86402	0.0623192	0.432584	NOT
SLC35A4	136.102	0.601819	0.322884	1.86389	0.0623375	0.432584	NOT
LAMTOR3	112.589	0.528564	0.283676	1.86327	0.0624249	0.432782	NOT
POLR3C	73.6396	-0.508836	0.273096	-1.86321	0.0624324	0.432782	NOT
ACTR3B	13.4895	1.1355	0.609499	1.86301	0.0624614	0.432782	NOT
UBC	316.805	0.334177	0.179402	1.86273	0.0625006	0.432833	NOT
LIF	50.3447	0.845424	0.454004	1.86215	0.0625816	0.433075	NOT
GRID1	21.3594	1.24431	0.668292	1.86192	0.0626137	0.433075	NOT
PLXNB1	21.7614	0.922105	0.495296	1.86172	0.062642	0.433075	NOT
C8orf84	12.4748	-1.38206	0.742411	-1.86158	0.0626627	0.433075	NOT
ACOT8	5.82116	1.38649	0.745071	1.86089	0.0627604	0.433207	NOT
KDM6B	120.442	0.828652	0.445325	1.86078	0.0627753	0.433207	NOT
LEPREL1	100.489	-0.707981	0.380493	-1.86069	0.0627875	0.433207	NOT
ZNF429	37.6237	0.779725	0.419085	1.86054	0.0628089	0.433207	NOT
CDK16	156.841	0.519956	0.279538	1.86005	0.0628778	0.433462	NOT
ZNF827	150.486	0.577212	0.310713	1.8577	0.063211	0.435219	NOT
LOC100233209	19.5187	-1.13065	0.608634	-1.85769	0.0632131	0.435219	NOT
PRR15	8.10693	1.34569	0.724429	1.85758	0.0632285	0.435219	NOT
FADS2	154.081	0.683351	0.368132	1.85627	0.0634153	0.435802	NOT
EIF2AK1	425.26	0.468534	0.252429	1.8561	0.0634392	0.435802	NOT
CAD	78.1952	0.67033	0.361171	1.85599	0.0634549	0.435802	NOT
WDR6	18.5033	1.1101	0.598141	1.85591	0.0634662	0.435802	NOT
C11orf82	15.232	1.15749	0.623694	1.85586	0.0634731	0.435802	NOT
RBX1	112.986	0.475803	0.256442	1.8554	0.0635389	0.435998	NOT
RARG	42.9155	0.897975	0.484028	1.85521	0.0635657	0.435998	NOT
C6	13.5408	1.40683	0.758462	1.85485	0.0636178	0.436096	NOT
UHRF1	4.40842	1.28495	0.692822	1.85467	0.063644	0.436096	NOT
LOC100130855	3.08715	1.43876	0.775921	1.85425	0.0637028	0.436099	NOT
TRAPPC1	96.1111	-0.664872	0.358573	-1.85421	0.0637084	0.436099	NOT
ME1	52.8845	-0.590043	0.318272	-1.8539	0.0637541	0.436192	NOT
AHNAK	8774.19	-0.221132	0.119344	-1.8529	0.0638967	0.436948	NOT
LRRC8C	405.829	-0.453571	0.244891	-1.85214	0.0640063	0.437383	NOT
DCUN1D4	212.685	-0.326147	0.176105	-1.85201	0.0640246	0.437383	NOT
IL1RAP	314.03	0.385057	0.207951	1.85167	0.0640731	0.437416	NOT
UBE2L6	142.699	-0.540654	0.292004	-1.85153	0.0640935	0.437416	NOT
BMP2K	680.602	-0.293619	0.158619	-1.8511	0.0641548	0.437615	NOT
DFNA5	31.7565	-0.793221	0.428642	-1.85055	0.0642348	0.437776	NOT
TSPAN13	59.3954	0.742344	0.40116	1.85049	0.0642427	0.437776	NOT
[truncated: 11,623 more rows]

## Sheet: Epi_GO
ID	Description	setSize	enrichmentScore	NES	pvalue	p.adjust	qvalues	rank	leading_edge	core_enrichment
GOBP_BLOOD_VESSEL_MORPHOGENESIS	GOBP_BLOOD_VESSEL_MORPHOGENESIS	459	0.558053	1.74423	1e-10	6.13488e-08	4.93691e-08	2263	tags=31%, list=16%, signal=27%	CAV1/THBS1/COL4A2/ROBO1/CDH5/GREM1/MYLK/WNT5A/CHI3L1/GATA6/ANXA1/GJC1/QKI/FN1/SCG2/SERPINE1/FAP/PTGS2/HEG1/MCAM/ADM/ZFPM2/COL15A1/CDH2/PDGFRB/AKT3/CYBB/FLNA/TGFB2/NRP1/ETS1/COL4A1/APOLD1/SLC12A2/FZD4/HSPB6/NRP2/ACTG1/CDH13/FLT1/HIPK2/PRCP/S1PR1/EPHB3/SPI1/PLXDC1/PRKD1/SERPINF1/C3/GJA5/ADAMTS1/ANGPTL2/SFRP1/CLEC14A/MMP2/SFRP2/CALD1/EDNRA/STRA6/COL4A3/B4GALT1/SAT1/ECM1/PDGFRA/HMOX1/VEZF1/APOD/ANG/S…
GOBP_EPITHELIAL_CELL_DIFFERENTIATION	GOBP_EPITHELIAL_CELL_DIFFERENTIATION	430	0.518068	1.61606	1e-10	6.13488e-08	4.93691e-08	2381	tags=31%, list=17%, signal=26%	CAV1/VIM/CNN3/CDH5/GREM1/ZEB1/PECAM1/FSTL1/WNT5A/GATA6/ANXA1/ERRFI1/BASP1/SERPINE1/HEG1/RDX/COL15A1/CDH2/FLNA/NRP1/COL4A1/APOLD1/PGR/RARB/S1PR1/PALLD/ZDHHC7/LGALS3/BCCIP/ESR1/USH1C/PKHD1/ANXA4/B4GALT1/VEZF1/DSC3/LAMB2/VEGFA/KRT23/KRT17/ACTA2/SPRY1/SPINK5/TJP3/MSN/ABCA12/SOX9/TMOD1/PDPN/WWTR1/SOD1/FLG/WNT4/INTU/STC1/HNF4A/AR/HDAC1/GLI1/LIF/PODXL/CEBPB/ZBED2/NRG1/KRT7/CD109/ABI2/COL18A1/TAGLN/AHI1/…
GOBP_EXTERNAL_ENCAPSULATING_STRUCTURE_ORGANIZATION	GOBP_EXTERNAL_ENCAPSULATING_STRUCTURE_ORGANIZATION	288	0.613968	1.89727	1e-10	6.13488e-08	4.93691e-08	2351	tags=40%, list=17%, signal=34%	FLRT2/LAMA4/CAV1/PHLDB2/THBS1/COL4A2/ADAMTS2/GREM1/PECAM1/DDR2/PXDN/FN1/SERPINE1/FAP/SPP1/HTRA1/COL15A1/MYH11/VWF/COL6A3/COL6A2/COL4A5/TGFB2/ETS1/PTX3/COL4A1/COL14A1/A2M/SERPINH1/CTSS/FBLN5/OLFML2A/NID2/MFAP4/LAMA2/SERAC1/ADAMTS1/MMP2/SFRP2/BGN/PRSS1/MMP15/SMPD3/TNC/COL4A3/B4GALT1/PDGFRA/CCDC80/APLP1/POSTN/LAMB2/FKBP10/SULF1/SPINK5/ADAMTS4/ITGB1/AEBP1/TGFBI/ECM2/NID1/SOX9/SPARC/PDPN/ADAMTS9/SH3PX…
GOBP_POSITIVE_REGULATION_OF_LOCOMOTION	GOBP_POSITIVE_REGULATION_OF_LOCOMOTION	420	0.557206	1.73747	1e-10	6.13488e-08	4.93691e-08	1852	tags=28%, list=13%, signal=25%	CAV1/BVES/THBS1/SEMA3C/CDH5/PDGFC/MYLK/PECAM1/IL1R1/WNT5A/DDR2/RARRES2/ANXA1/FN1/SCG2/SERPINE1/TNFAIP6/PTGS2/PTP4A1/MCAM/SNAI2/FERMT2/RDX/PDGFRB/IGFBP5/F2R/AKT3/SOD2/FLNA/TGFB2/NRP1/ETS1/PLAU/AKAP12/NRP2/IL16/ACTG1/CDH13/FLT1/S1PR1/TPBG/FAM89B/PFN1/LGALS3/DOCK4/PTPRC/PRKD1/ADAMTS1/NR4A3/PLVAP/MCU/ADAM17/LPAR1/FGR/SEMA3D/PDGFRA/HMOX1/GNAI2/SEMA5A/POSTN/SEMA3E/SEMA3F/VEGFA/CLEC7A/ITGB1/ATP8A1/SOX9/…
GOBP_WOUND_HEALING	GOBP_WOUND_HEALING	375	0.524568	1.63058	1e-10	6.13488e-08	4.93691e-08	2346	tags=32%, list=17%, signal=28%	CAV1/DYSF/PHLDB2/THBS1/MYLK/DCBLD2/WNT5A/TSPAN8/GATA6/ANXA1/FN1/SERPINE1/FAP/MCAM/FERMT2/ZFPM2/PDGFRB/VWF/F2R/FLNA/TGFB2/ETS1/SLC12A2/PLAU/OCLN/A2M/GJA1/DGKG/ACTG1/PRCP/TRPC6/F2RL2/CD36/TFPI2/LCK/ADAM17/S100A8/TEC/TNC/DGKI/B4GALT1/PDGFRA/HMOX1/SYT7/TGFB3/HPS5/SAA1/C6orf89/POSTN/AXL/FKBP10/VEGFA/CLEC7A/ITGB1/PLAT/SPARC/CD40/PDPN/PRKACB/WNT4/LMAN1/PAFAH2/GNG2/MYH9/SCARB1/HNF4A/SERPINE2/HDAC1/DTNBP1…
GOCC_COLLAGEN_CONTAINING_EXTRACELLULAR_MATRIX	GOCC_COLLAGEN_CONTAINING_EXTRACELLULAR_MATRIX	272	0.687259	2.12172	1e-10	6.13488e-08	4.93691e-08	2364	tags=47%, list=17%, signal=40%	LAMA4/EFEMP1/THBS1/COL4A2/ADAMTS2/GREM1/WNT5A/RARRES2/PXDN/ANXA1/IGFBP7/FN1/SERPINE1/EDIL3/ITIH5/LTBP2/SSC5D/HTRA1/COL15A1/CDH2/VWF/COL6A3/PODN/COL6A2/LGALS1/SPARCL1/LTBP1/COL4A5/TGFB2/COL4A1/MXRA7/COL14A1/A2M/SERPINH1/CTSS/FBLN5/NID2/SDC2/MFAP4/CDH13/LAMA2/CDON/LGALS3/SERPINF1/ADAMTS1/TGM2/ANGPTL2/SFRP1/PRG4/CLEC14A/MMP2/SFRP2/C1QC/ASPN/ANXA4/BGN/PRSS1/S100A8/TNC/COL4A3/ECM1/LGALS4/TGFB3/TIMP3/C…
GOCC_ENDOPLASMIC_RETICULUM_LUMEN	GOCC_ENDOPLASMIC_RETICULUM_LUMEN	208	0.605649	1.86026	1e-10	6.13488e-08	4.93691e-08	1860	tags=34%, list=13%, signal=30%	THBS1/COL4A2/PDGFC/FSTL1/WNT5A/PRSS23/IGFBP7/FN1/SCG2/IGFBP3/PTGS2/SPP1/COL15A1/CDH2/COL6A3/IGFBP5/COL6A2/LGALS1/SPARCL1/LTBP1/COL4A5/COL4A1/CERCAM/COL14A1/SERPINH1/MXRA8/SDC2/CES2/C3/TNC/COL4A3/EDEM3/LAMB2/FKBP10/RCN3/TXNDC12/ERP27/H6PD/PTPRN2/BCHE/LAMB1/WNT4/HSPA5/FOXRED2/LAMC1/TSPAN14/B2M/PDGFD/SUMF1/IL6/FSTL3/ADAMTS7/PDIA5/COL18A1/ADAMTS5/MFGE8/COL24A1/F8/TXNDC16/CP/SPON1/COL1A2/COL4A4/GPX7/C…
GOCC_EXTERNAL_ENCAPSULATING_STRUCTURE	GOCC_EXTERNAL_ENCAPSULATING_STRUCTURE	352	0.658562	2.04413	1e-10	6.13488e-08	4.93691e-08	2364	tags=43%, list=17%, signal=37%	FLRT2/LAMA4/EFEMP1/THBS1/COL4A2/ADAMTS2/GREM1/WNT5A/RARRES2/CHI3L1/PXDN/ANXA1/IGFBP7/FN1/SERPINE1/EDIL3/ITIH5/LTBP2/SSC5D/HTRA1/CD248/COL15A1/CDH2/VWF/COL6A3/PODN/COL6A2/LGALS1/SPARCL1/LTBP1/COL4A5/TGFB2/PTX3/COL4A1/MXRA7/COL14A1/A2M/SERPINH1/CTSS/FBLN5/OLFML2A/NID2/SDC2/MFAP4/CDH13/LAMA2/CDON/LGALS3/SERAC1/SERPINF1/ADAMTS1/TGM2/ANGPTL2/SFRP1/PRG4/TFPI2/CLEC14A/MMP2/SFRP2/C1QC/SPON2/ASPN/ANXA4/BG…
GOMF_EXTRACELLULAR_MATRIX_STRUCTURAL_CONSTITUENT	GOMF_EXTRACELLULAR_MATRIX_STRUCTURAL_CONSTITUENT	120	0.712755	2.14969	1e-10	6.13488e-08	4.93691e-08	2633	tags=57%, list=19%, signal=46%	LAMA4/EFEMP1/THBS1/COL4A2/CHI3L1/PXDN/IGFBP7/FN1/EDIL3/LTBP2/COL15A1/VWF/COL6A3/PODN/COL6A2/LTBP1/COL4A5/COL4A1/COL14A1/FBLN5/NID2/MFAP4/LAMA2/PRG4/TFPI2/ASPN/BGN/TNC/COL4A3/ECM1/POSTN/FGL2/LAMB2/AEBP1/TGFBI/NID1/SPARC/MMRN2/MUC17/LAMB1/ELN/LAMC1/THSD4/HMCN1/PRELP/COL18A1/SRPX2/MFGE8/COL24A1/SPON1/COL1A2/COL4A4/COL1A1/COL5A1/COL6A1/FBN1/FRAS1/COMP/COL11A1/COL7A1/LAMC2/COL21A1/DPT/ABI3BP/THBS2/COL…
GOBP_RESPONSE_TO_WOUNDING	GOBP_RESPONSE_TO_WOUNDING	461	0.508902	1.5902	1.06787e-10	6.13488e-08	4.93691e-08	2317	tags=30%, list=17%, signal=26%	CAV1/DYSF/PHLDB2/THBS1/MYLK/DCBLD2/WNT5A/TSPAN8/GATA6/ANXA1/FN1/SERPINE1/MAP1B/FAP/SPP1/CREB3L2/MCAM/ADM/FERMT2/ZFPM2/CHL1/PDGFRB/VWF/F2R/LGALS1/FLNA/TGFB2/NRP1/ETS1/SLC12A2/PLAU/OCLN/A2M/GJA1/DGKG/ACTG1/PRCP/TRPC6/TYROBP/F2RL2/CD36/TFPI2/LCK/ADAM17/S100A8/TEC/TNC/DGKI/B4GALT1/PDGFRA/HMOX1/APOD/SYT7/TGFB3/HPS5/SAA1/C6orf89/POSTN/LAMB2/AXL/FKBP10/VEGFA/CLEC7A/ITGB1/PLAT/PLLP/SPARC/CD40/PDPN/PRKACB…
GOBP_INFLAMMATORY_RESPONSE	GOBP_INFLAMMATORY_RESPONSE	490	0.492953	1.54204	4.7095e-10	2.45964e-07	1.97934e-07	2269	tags=26%, list=16%, signal=22%	LYZ/THBS1/CDH5/CXCL6/IL1R1/WNT5A/RARRES2/CHI3L1/ANXA1/FN1/SCG2/SERPINE1/TNFAIP6/PTGS2/SPP1/ADM/F2R/TREM1/CYBB/ETS1/PTX3/NUPR1/GJA1/IL16/PTGES/PRCP/CCRL2/SAA2/H19/PTPRC/PRKD1/SERPINF1/C3/TGM2/CD36/ESR1/C4B/BLNK/TLR1/REL/S100A8/CD14/B4GALT1/ECM1/HMOX1/APOD/LIPA/SAA1/AXL/FPR1/CD180/ABCF1/HCK/PIK3AP1/CLEC7A/TLR7/ITGB1/TLR6/TNIP3/C3AR1/IL18R1/CD40/TLR8/IL10RB/MVK/FNDC4/SOD1/SUCNR1/NOX4/PER1/TNFSF4/BMP…
GOBP_HEART_DEVELOPMENT	GOBP_HEART_DEVELOPMENT	402	0.507441	1.57924	8.03379e-10	3.84617e-07	3.09512e-07	3096	tags=35%, list=22%, signal=28%	FLRT2/BVES/CPE/ROBO1/SEMA3C/GREM1/WNT5A/GATA6/GJC1/TAB2/FN1/BASP1/HEG1/ADM/SNAI2/ZFPM2/MYH11/PDGFRB/FLNA/TGFB2/NRP1/PDLIM3/GJA1/NRP2/BICC1/RARB/S1PR1/HEYL/GJA5/ADAMTS1/CITED2/SIK1/SFRP2/EDNRA/STRA6/PDGFRA/PCSK5/VEGFA/SPRY1/DNAH5/OLFM1/WDR11/OXTR/SOX9/SPARC/SGCD/ADAMTS9/SH3PXD2B/ANKRD1/SLC9A1/PLXND1/ELN/MIB1/KAT2A/MBD2/SNAI1/ANK2/GLI1/DHRS3/PPP3CB/NOS3/HTR2B/DLC1/PDCD4/NRG1/HAS2/RGS2/AHI1/CRKL/CAL…
GOBP_MUSCLE_STRUCTURE_DEVELOPMENT	GOBP_MUSCLE_STRUCTURE_DEVELOPMENT	397	0.504763	1.56979	2.82968e-09	1.2505e-06	1.00631e-06	2789	tags=32%, list=20%, signal=27%	CAV1/DYSF/BVES/GREM1/MYLK/WNT5A/GATA6/QKI/BASP1/IGFBP3/HEG1/ADM/ZFPM2/MYH11/CDH2/PDGFRB/COL6A3/IGFBP5/LGALS1/SOD2/TGFB2/NKD1/SYNE1/NUPR1/PDLIM3/CFL2/RARB/LAMA2/S1PR1/HEYL/CDON/PITX1/CD164/TMEM204/GPCPD1/SIK1/FXR1/STRA6/PDGFRA/OLFM2/VEGFA/CACNA1H/MRAS/PRKAA1/SOX9/TMOD1/SGCD/BTG2/CTF1/ANKRD1/EVC/SLC9A1/ELN/WNT4/EGR2/KAT2A/SGCE/CSRP2/ANK2/CTH/MYH9/RPS6KB1/LIF/PDCD4/NRG1/TAGLN/IL18/TMOD3/RGS2/RGS4/ER…
GOBP_CIRCULATORY_SYSTEM_PROCESS	GOBP_CIRCULATORY_SYSTEM_PROCESS	381	0.505153	1.57066	3.05349e-09	1.25302e-06	1.00834e-06	3231	tags=40%, list=23%, signal=31%	PDE3A/CAV1/BVES/SGK1/CDH5/RARRES2/GJC1/KCNE3/PTGS2/HEG1/SLC2A3/ADM/ABCC9/FERMT2/F2R/SOD2/FLNA/TGFB2/SLC12A2/OCLN/KCND2/AKAP12/GJA1/CYP2J2/PRCP/DOCK4/GJA5/CD36/SLC6A20/SLC1A3/EDNRA/COL4A3/HMOX1/SLC15A2/GNAI2/MME/TRPC1/PCSK5/POSTN/VEGFA/ACTA2/CACNA1H/PDE4B/TJP3/SLC7A2/OXTR/ATP8A1/C3AR1/ANGPT1/SGCD/VEGFC/MAP2K6/WWTR1/SOD1/SUCNR1/FXYD6/ENPEP/NOX4/TFRC/ATP1B1/ACSM3/SLC9A1/ELN/STC1/ANK2/AR/PTAFR/CELF2/…
GOBP_REGULATION_OF_VASCULATURE_DEVELOPMENT	GOBP_REGULATION_OF_VASCULATURE_DEVELOPMENT	207	0.558468	1.71584	4.72808e-09	1.74213e-06	1.40194e-06	1901	tags=29%, list=14%, signal=25%	THBS1/COL4A2/CDH5/GREM1/WNT5A/CHI3L1/GATA6/SERPINE1/ADM/AKT3/CYBB/TGFB2/ETS1/SLC12A2/HSPB6/FLT1/HIPK2/PRKD1/SERPINF1/C3/ADAMTS1/SFRP1/SFRP2/COL4A3/ECM1/HMOX1/SEMA5A/SEMA3E/SULF1/VEGFA/TNFSF12/SPINK5/ITGB1/C3AR1/PTPRM/GLUL/SPARC/CD40/VEGFC/ADAMTS9/RHOJ/PLXND1/WNT4/NOS3/ENPP2/IL6/FGF1/F3/CX3CR1/ENG/KLF2/PDPK1/HMGA2/GAB1/ITGAX/CREB3L1/FOXC1/CCL11/ADAM12
GOBP_EPITHELIAL_CELL_PROLIFERATION	GOBP_EPITHELIAL_CELL_PROLIFERATION	291	0.536464	1.65819	4.85189e-09	1.74213e-06	1.40194e-06	3010	tags=37%, list=22%, signal=30%	CAV1/THBS1/ROBO1/WNT5A/ERRFI1/SCG2/IGFBP3/FAP/HTRA1/SNAI2/IGFBP5/AKT3/TGFB2/NRP1/PGR/NUPR1/GJA1/NRP2/CDH13/FLT1/PRKD1/SERPINF1/NR4A3/ESR1/SFRP1/ADAM17/SFRP2/PKHD1/LGR4/COL4A3/B4GALT1/ECM1/HMOX1/ANG/C6orf89/SEMA5A/SULF1/VEGFA/FST/TNFSF12/SOX9/PTPRM/SPARC/VEGFC/LGR5/LAMB1/INTU/ATP7A/SCARB1/AR/LAMC1/GLI1/NLRC3/B2M/HTR2B/CEBPB/CYP7B1/IL6/KLF9/CD109/HAS2/TLR4/FGF1/F3/FUT2/EREG/TGFA/FGFR2/PDPK1/WDR77/C…
GOBP_REPRODUCTIVE_SYSTEM_DEVELOPMENT	GOBP_REPRODUCTIVE_SYSTEM_DEVELOPMENT	287	0.524815	1.62176	7.94346e-09	2.68442e-06	2.16023e-06	1950	tags=27%, list=14%, signal=24%	WNT5A/GATA6/ANXA1/BASP1/SPP1/HTRA1/ADM/HSD17B2/ZFPM2/PDGFRB/FLNA/TGFB2/PTX3/PGR/NUPR1/FZD4/NCOA4/GJA1/SERPINF1/C3/ADAMTS1/CITED2/ESR1/SFRP1/RHOBTB3/SFRP2/LGR4/TNC/STRA6/PDGFRA/ANG/MME/AXL/SULF1/VEGFA/BCL2L11/FST/NASP/SOX9/DHX37/SOD1/IDH1/WNT4/HSPA5/STC1/SNAI1/BMPR1B/SERPINE2/AR/GLI1/LIF/CEBPB/MERTK/CYP7B1/MGST1/FSTL3/RRM1/E2F7/CRKL/PLK4/EREG/FGFR2/WDR77/ARID5B/CCNF/FEM1B/CASP3/ETNK2/PKD2/CCND1/FO…
GOBP_TISSUE_MORPHOGENESIS	GOBP_TISSUE_MORPHOGENESIS	480	0.479529	1.49936	1.19474e-08	3.81321e-06	3.0686e-06	2947	tags=32%, list=21%, signal=26%	PHLDB2/ROBO1/SEMA3C/GREM1/MYLK/WNT5A/HEG1/ADM/SNAI2/FERMT2/ZFPM2/IGFBP5/FLNA/TGFB2/NRP1/COL4A1/NKD1/PGR/FZD4/GJA1/ALDH1A3/NRP2/ACTG1/S1PR1/ZDHHC7/HEYL/PFN1/TCTN1/TGM2/ESR1/SFRP1/ADAM17/SFRP2/PKHD1/LGR4/EDNRA/TNC/SEMA3E/SULF1/VEGFA/GCNT3/KRT17/ACTA2/SPRY1/FST/ITGB1/MSN/SOX9/PDPN/VEGFC/PRKACB/LGR5/FZD1/ANKRD1/PLXND1/WNT4/MTHFR/MIB1/KAT2A/INTU/ATP7A/ARHGAP12/STC1/SNAI1/DVL3/AR/ADAMTS16/LIF/PODXL/NOS…
GOBP_ENDOTHELIAL_CELL_MIGRATION	GOBP_ENDOTHELIAL_CELL_MIGRATION	177	0.566265	1.73208	3.00916e-08	9.09875e-06	7.32201e-06	1173	tags=22%, list=8%, signal=20%	THBS1/ROBO1/CDH5/GREM1/FSTL1/WNT5A/ANXA1/SCG2/FAP/PTGS2/AKT3/NRP1/ETS1/NRP2/CDH13/PRCP/PRKD1/SERPINF1/CLEC14A/ADAM17/HMOX1/SEMA5A/VEGFA/TNFSF12/PTPRM/ANGPT1/GLUL/SPARC/CD40/MMRN2/VEGFC/ADAMTS9/RHOJ/PLXND1/STC1/MYH9/SCARB1/LGMN/NOS3
GOBP_OUTFLOW_TRACT_MORPHOGENESIS	GOBP_OUTFLOW_TRACT_MORPHOGENESIS	54	0.722624	2.02015	3.56752e-08	1.02477e-05	8.2466e-06	2064	tags=46%, list=15%, signal=40%	ROBO1/SEMA3C/WNT5A/GATA6/ZFPM2/TGFB2/NRP1/NRP2/RARB/HEYL/GJA5/CITED2/SFRP2/VEGFA/PLXND1/ELN/DHRS3/CRKL/ENG/SEC24B/FGFR2/MIR17HG/FOXC1/HES1/MEF2C
GOBP_TAXIS	GOBP_TAXIS	440	0.487908	1.52328	3.99147e-08	1.07092e-05	8.61799e-06	3287	tags=35%, list=24%, signal=28%	FLRT2/THBS1/ROBO1/SEMA3C/CXCL6/GREM1/WNT5A/RARRES2/ANXA1/SCG2/SERPINE1/CHL1/PDGFRB/TGFB2/NRP1/SLC12A2/PLAU/NRP2/IL16/VLDLR/CDH13/LAMA2/FLT1/PLXNC1/CCRL2/S1PR1/TPBG/PALLD/EPHB3/LGALS3/DOCK4/PRKD1/DUSP1/EPHA3/MCU/ADAM17/LPAR1/S100A8/CRMP1/TUBB3/SEMA3D/PDGFRA/NOTCH3/SAA1/SEMA5A/SEMA3E/LAMB2/SEMA3F/VEGFA/FPR1/PDE4B/C3AR1/PTPRM/ANGPT1/DEFB1/CXCL16/VEGFC/RNASE2/SHC3/KIF5C/SUCNR1/PLXND1/EGR2/PREX1/BMPR1…
GOBP_HUMORAL_IMMUNE_RESPONSE	GOBP_HUMORAL_IMMUNE_RESPONSE	121	0.615837	1.85804	4.101e-08	1.07092e-05	8.61799e-06	1317	tags=26%, list=9%, signal=23%	C1R/LYZ/CFH/C1S/CXCL6/RARRES2/GATA6/C7/TREM1/A2M/MFAP4/PTPRC/IGLL5/C3/GAPDH/C4B/BLNK/C1QC/S100A8/ANG/SPINK5/C1QB/C3AR1/OCIAD2/DEFB1/ATP7A/CXCL1/IL6/CFB/BST1/C6
GOCC_BASEMENT_MEMBRANE	GOCC_BASEMENT_MEMBRANE	66	0.68493	1.96685	4.41718e-08	1.10333e-05	8.87883e-06	2364	tags=52%, list=17%, signal=43%	LAMA4/COL4A2/FN1/COL15A1/COL4A5/COL4A1/NID2/LAMA2/SERPINF1/ADAMTS1/TNC/COL4A3/CCDC80/ANG/APLP1/LAMB2/TGFBI/NID1/SPARC/MMRN2/LAMB1/LAMC1/HMCN1/COL18A1/DST/COL4A4/COL5A1/FBN1/FRAS1/ANXA2P2/COL7A1/LAMC2/EGFLAM/FREM1
GOMF_GROWTH_FACTOR_BINDING	GOMF_GROWTH_FACTOR_BINDING	104	0.623958	1.85641	5.62931e-08	1.34752e-05	1.08438e-05	1817	tags=33%, list=13%, signal=29%	THBS1/IL1R1/PXDN/IGFBP7/IGFBP3/LTBP2/HTRA1/PDGFRB/IGFBP5/LTBP1/NRP1/COL4A1/A2M/NRP2/FLT1/DUSP1/CD36/PDGFRA/TGFB3/LRRC32/CD109/SRPX2/IGF1R/HTRA3/VASN/ENG/FGFR2/LIFR/ERBB3/SHC1/COL1A2/COL1A1/COL5A1/COL6A1
GOBP_HEART_MORPHOGENESIS	GOBP_HEART_MORPHOGENESIS	171	0.567747	1.73856	6.36358e-08	1.46235e-05	1.17679e-05	2359	tags=33%, list=17%, signal=28%	FLRT2/CPE/ROBO1/SEMA3C/WNT5A/GATA6/HEG1/SNAI2/ZFPM2/FLNA/TGFB2/NRP1/NRP2/RARB/S1PR1/HEYL/GJA5/ADAMTS1/CITED2/SFRP2/VEGFA/SPRY1/OLFM1/SOX9/ANKRD1/PLXND1/ELN/MIB1/SNAI1/DHRS3/NOS3/HTR2B/DLC1/PDCD4/NRG1/HAS2/AHI1/CRKL/ENG/SEC24B/FGFR2/DKK1/MIR17HG/PKD2/RNF207/COL5A1/FOXC1/HES1/SHOX2/MEF2C/COL11A1/ACVRL1/SOX4/CCDC39/NDRG4/GATA4/SMO
GOBP_RESPONSE_TO_TRANSFORMING_GROWTH_FACTOR_BETA	GOBP_RESPONSE_TO_TRANSFORMING_GROWTH_FACTOR_BETA	204	0.551327	1.69291	6.67244e-08	1.47435e-05	1.18645e-05	2161	tags=28%, list=16%, signal=24%	PDE3A/CAV1/THBS1/COL4A2/CDH5/WNT5A/LTBP2/HTRA1/FERMT2/LTBP1/TGFB2/HIPK2/PEG10/FAM89B/CITED2/SFRP1/ADAM17/ASPN/TGFB3/DKK3/FUT8/POSTN/SPRY1/CHST11/SOX9/FNDC4/LIMS1/NOX4/ANKRD1/WNT4/HSPA5/NR3C1/WWOX/LRRC32/PDGFD/CD109/CRKL/HTRA3/VASN/CX3CR1/ENG/FGFR2/PDPK1/MIR17HG/COL1A2/DAB2/BAMBI/HDAC2/COL1A1/CREB1/CLDN1/FBN1/CAV2/ZFP36L1/HSP90AB1/MEF2C/PTPRK/ACVRL1
GOBP_MESENCHYME_DEVELOPMENT	GOBP_MESENCHYME_DEVELOPMENT	208	0.548435	1.68452	7.19062e-08	1.53e-05	1.23124e-05	2359	tags=34%, list=17%, signal=29%	PHLDB2/ROBO1/SEMA3C/GREM1/WNT5A/FN1/BASP1/SNAI2/FERMT2/ZFPM2/CDH2/PDGFRB/FLNA/TGFB2/NRP1/NRP2/BNC2/HEYL/CITED2/SFRP1/EPHA3/SFRP2/EDNRA/SEMA3D/TGFB3/SEMA5A/SEMA3E/SEMA3F/ACTA2/SPRY1/OLFM1/SOX9/PDPN/WWTR1/WNT4/SNAI1/NOS3/HTR2B/PDCD4/CLASP1/IL6/NRG1/HAS2/VASN/PHACTR4/ENG/FGFR2/FBXL17/ERBB3/DAB2/PKD2/HMGA2/PTK7/BAMBI/HDAC2/COL1A1/SEMA6D/FOXC1/HES1/ZFP36L1/WT1/ERBB4/MEF2C/FOXF2/ACVRL1/TAPT1/EDNRB/TIAM…
GOBP_SEX_DIFFERENTIATION	GOBP_SEX_DIFFERENTIATION	164	0.568881	1.73602	8.72126e-08	1.77496e-05	1.42836e-05	2543	tags=35%, list=18%, signal=29%	WNT5A/GATA6/BASP1/ZFPM2/PDGFRB/FLNA/TGFB2/PTX3/PGR/NUPR1/FZD4/NCOA4/ADAMTS1/CITED2/ESR1/SFRP1/RHOBTB3/SFRP2/LGR4/STRA6/PDGFRA/ANG/AXL/VEGFA/BCL2L11/FST/NASP/SOX9/DHX37/SOD1/IDH1/WNT4/HSPA5/BMPR1B/HNF4A/AR/CEBPB/MERTK/MGST1/FSTL3/RRM1/CRKL/EREG/ARID5B/CASP3/CCND1/FOXC1/NUP107/WT1/FOXF2/ARRB1/ACVR1B/SEMA3A/GATA4/NUDT1/FGF9/EIF2B4
GOBP_DEVELOPMENT_OF_PRIMARY_SEXUAL_CHARACTERISTICS	GOBP_DEVELOPMENT_OF_PRIMARY_SEXUAL_CHARACTERISTICS	139	0.588102	1.77998	8.95975e-08	1.77496e-05	1.42836e-05	2543	tags=37%, list=18%, signal=30%	WNT5A/GATA6/BASP1/ZFPM2/PDGFRB/FLNA/TGFB2/PTX3/PGR/NUPR1/FZD4/NCOA4/ADAMTS1/CITED2/ESR1/SFRP1/RHOBTB3/SFRP2/PDGFRA/ANG/VEGFA/BCL2L11/FST/NASP/SOX9/DHX37/SOD1/IDH1/WNT4/HSPA5/BMPR1B/AR/CEBPB/MGST1/FSTL3/RRM1/CRKL/EREG/ARID5B/CASP3/CCND1/FOXC1/NUP107/WT1/ARRB1/ACVR1B/SEMA3A/GATA4/NUDT1/FGF9/EIF2B4
GOBP_UROGENITAL_SYSTEM_DEVELOPMENT	GOBP_UROGENITAL_SYSTEM_DEVELOPMENT	252	0.523468	1.61497	9.80509e-08	1.87767e-05	1.51102e-05	2947	tags=39%, list=21%, signal=32%	GREM1/PECAM1/WNT5A/ANXA1/BASP1/PYGO1/PDGFRB/TGFB2/COL4A1/BICC1/RARB/EPHB3/HEYL/GLIS2/SERPINF1/ADAMTS1/ESR1/SFRP1/PKHD1/LGR4/TNC/STRA6/COL4A3/PDGFRA/MME/PCSK5/LAMB2/SULF1/VEGFA/GCNT3/ACTA2/SPRY1/BCL2L11/NID1/SOX9/ANGPT1/WWTR1/LGR5/ENPEP/PLXND1/WNT4/C1GALT1/AR/GLI1/ADAMTS16/LIF/PODXL/CYP7B1/PDGFD/CA2/FSTL3/HAS2/AHI1/CRKL/FGF1/SNX17/DCHS2/FGFR2/KCNJ8/WDR77/ARID5B/FEM1B/AP1B1/PKD2/COL4A4/MMP9/PTK7/GC…
GOMF_GLYCOSAMINOGLYCAN_BINDING	GOMF_GLYCOSAMINOGLYCAN_BINDING	133	0.59661	1.80296	1.24798e-07	2.28932e-05	1.84228e-05	2910	tags=41%, list=21%, signal=32%	CFH/THBS1/CXCL6/FSTL1/REG4/FN1/TNFAIP6/LTBP2/NRP1/NELL2/NRP2/PTPRC/ADAMTS1/SFRP1/BGN/CCDC80/ANG/SAA1/SEMA5A/APLP1/POSTN/SULF1/VEGFA/ECM2/LIPH/SPOCK2/HDGF/SERPINE2/DPYSL3/PRELP/ADAMTS5/FGF1/NDNF/LIPG/ENG/FGFR2/COL5A1/CXCL11/FBN1/NLRP3/COMP/COL11A1/ADAMTS3/LAMC2/FBLN7/EGFLAM/FGF9/THBS2/HBEGF/TGFBR3/STAB1/SLIT2/HSD17B12/SULF2
GOMF_STRUCTURAL_MOLECULE_ACTIVITY	GOMF_STRUCTURAL_MOLECULE_ACTIVITY	470	0.469628	1.46846	1.27517e-07	2.28932e-05	1.84228e-05	2689	tags=28%, list=19%, signal=23%	LAMA4/VIM/BVES/EFEMP1/THBS1/TUBA1A/COL4A2/CHI3L1/PXDN/IGFBP7/FN1/EDIL3/MAP1B/LTBP2/TPM2/CLDN18/COL15A1/MYH11/VWF/COL6A3/PODN/COL6A2/ADD3/LTBP1/COL4A5/COL4A1/HSPB6/COL14A1/FBLN5/NID2/ACTG1/MFAP4/LAMA2/MAP1A/PRG4/TFPI2/ASPN/BGN/ARPC5/TUBB3/TNC/COL4A3/ECM1/HMOX1/POSTN/FGL2/LAMB2/KRT23/KRT17/STX2/MSN/AEBP1/TGFBI/NID1/PLLP/SPARC/MMRN2/FLG/MUC17/LAMB1/ELN/CLTCL1/CSRP2/MRPL17/TUBGCP3/LAMC1/RPL7/THSD4/HM…
GOBP_RESPONSE_TO_KETONE	GOBP_RESPONSE_TO_KETONE	147	0.578567	1.75614	1.60738e-07	2.7983e-05	2.25187e-05	1998	tags=29%, list=14%, signal=25%	CAV1/THBS1/SGK1/IGFBP7/ERRFI1/SPP1/GNAI1/CYBB/TGFB2/NCOA4/SERPINF1/DUSP1/SFRP1/NQO1/AACS/TNC/FOXO1/TGFB3/FBXO32/PRKAA1/NASP/MSN/OXTR/TNFSF4/GNG2/NR3C1/AR/RPS6KB1/PTAFR/FECH/PTGER2/KLF9/ELK1/KLF2/CD38/PTGFR/FOXP2/CCND1/CLDN1/DDIT4/ADCY5/NDOR1/AKR1C2
GOBP_CONNECTIVE_TISSUE_DEVELOPMENT	GOBP_CONNECTIVE_TISSUE_DEVELOPMENT	177	0.555118	1.69798	1.68066e-07	2.83983e-05	2.28529e-05	2461	tags=33%, list=18%, signal=27%	EFEMP1/GREM1/WNT5A/CHI3L1/TRPS1/CREB3L2/SNAI2/PDGFRB/SERPINH1/RARB/PITX1/SFRP2/AACS/BGN/SMPD3/ECM1/SULF1/RUNX2/ACTA2/CHST11/SLC39A14/TGFBI/SOX9/PKDCC/MBOAT2/SH3PXD2B/PTHLH/EVC/KAT2A/ATP7A/STC1/SNAI1/BMPR1B/GNAS/PDGFD/CSGALNACT1/MEX3C/ADAMTS7/PRRX1/PGRMC2/ARID5B/HMGA2/ZNF516/COL1A1/COL5A1/WT1/COMP/SHOX2/MEF2C/PIK3CA/COL11A1/ACVRL1/TAPT1/CD34/THRA/DGAT2/BBS2/ARRDC3
GOBP_RESPIRATORY_SYSTEM_DEVELOPMENT	GOBP_RESPIRATORY_SYSTEM_DEVELOPMENT	155	0.572546	1.74068	2.16309e-07	3.55055e-05	2.85722e-05	2111	tags=29%, list=15%, signal=25%	ADAMTS2/WNT5A/CHI3L1/GATA6/ERRFI1/BASP1/HEG1/ZFPM2/PDGFRB/IGFBP5/PGR/ALDH1A3/SMPD3/TNC/STRA6/PDGFRA/TGFB3/LIPA/MME/VEGFA/SIM2/SPRY1/RCN3/ABCA12/SOX9/SPARC/PKDCC/PDPN/ATP7A/HSD11B1/GLI1/LIF/FSTL3/FGF1/KLF2/SEC24B/FGFR2/MIR17HG/PTK7/CELSR1/CREB1/HES1/WT1/GPC3/CDC42
GOBP_AMEBOIDAL_TYPE_CELL_MIGRATION	GOBP_AMEBOIDAL_TYPE_CELL_MIGRATION	331	0.498329	1.54568	2.52057e-07	4.02241e-05	3.23694e-05	2263	tags=26%, list=16%, signal=22%	THBS1/ROBO1/SEMA3C/CDH5/GREM1/FSTL1/WNT5A/DDR2/ANXA1/FN1/SCG2/FAP/PTGS2/CDH2/ZFAND5/AKT3/TGFB2/NRP1/ETS1/AKAP12/GJA1/ZEB2/NRP2/CDH13/PRCP/TPBG/PFN2/PFN1/PRKD1/SERPINF1/CLEC14A/ADAM17/SEMA3D/HMOX1/SEMA5A/SEMA3E/SEMA3F/VEGFA/TNFSF12/ITGB1/SOX9/PTPRM/ANGPT1/GLUL/SPARC/CD40/MMRN2/VEGFC/ADAMTS9/RHOJ/PLXND1/STC1/MYH9/SCARB1/ARF6/LGMN/NOS3/HTR2B/CLASP1/ENPP2/HAS2/SRPX2/FGF1/PHACTR4/PDPK1/PIP5K1A/PAK1/AR…
GOMF_HEPARIN_BINDING	GOMF_HEPARIN_BINDING	92	0.630781	1.86636	2.72105e-07	4.22498e-05	3.39995e-05	2258	tags=40%, list=16%, signal=34%	CFH/THBS1/CXCL6/FSTL1/REG4/FN1/LTBP2/NRP1/NELL2/NRP2/PTPRC/ADAMTS1/SFRP1/CCDC80/ANG/SAA1/APLP1/POSTN/VEGFA/ECM2/LIPH/HDGF/SERPINE2/PRELP/ADAMTS5/FGF1/NDNF/LIPG/FGFR2/COL5A1/CXCL11/FBN1/COMP/COL11A1/ADAMTS3/LAMC2/FBLN7
GOBP_MUSCLE_TISSUE_DEVELOPMENT	GOBP_MUSCLE_TISSUE_DEVELOPMENT	239	0.516142	1.59069	3.67535e-07	5.50627e-05	4.43104e-05	2359	tags=29%, list=17%, signal=25%	CAV1/BVES/SEMA3C/GREM1/MYLK/WNT5A/GATA6/GJC1/HEG1/ZFPM2/MYH11/PDGFRB/ZFAND5/IGFBP5/TGFB2/NUPR1/GJA1/CFL2/RARB/S1PR1/HEYL/CDON/PITX1/GPCPD1/SIK1/STRA6/PDGFRA/VEGFA/PRKAA1/SOX9/SGCD/BTG2/ADAMTS9/ANKRD1/SLC9A1/ELN/EGR2/KAT2A/CSRP2/RPS6KB1/GLI1/NRG1/RGS2/RGS4/ENG/FGFR2/DKK1/MIR17HG/PAK1/ERBB3/PKD2/HLX/CREB1/KLF5/PDLIM5/FOXC1/CAV2/NDUFV2/WT1/ERBB4/FHOD3/SHOX2/MEF2C/CDC42/COL11A1/SLC8A1/NDRG4/GPX1/GATA…
GOBP_RESPONSE_TO_BACTERIUM	GOBP_RESPONSE_TO_BACTERIUM	372	0.485818	1.50902	3.79142e-07	5.50627e-05	4.43104e-05	2343	tags=28%, list=17%, signal=24%	CAV1/LYZ/VIM/CXCL6/WNT5A/RARRES2/REG4/TAB2/SERPINE1/SSC5D/ADM/CMPK2/F2R/SOD2/FAM20A/AKAP12/GJA1/PTGES/FKBP5/IGLL5/C3/CD36/C4B/TLR1/ADAM17/PYGL/FGR/S100A8/CD14/CCDC80/GSDMB/ANG/CD80/IL7R/AXL/CD180/PDE4B/SPINK5/HCK/TLR6/TNIP3/OCIAD2/MPEG1/DEFB1/SPARC/CD40/SCN7A/ANKRD1/TNFSF4/SCARB1/NAIP/RPS6KB1/PTAFR/GNG12/MAPKAPK2/B2M/NOS3/CEBPB/HMCN1/PDCD4/MGST1/CXCL1/IL6/PDCD1LG2/IL18/ADAMTS5/TLR4/ST13/PAF1/SYT1…
GOBP_NEGATIVE_REGULATION_OF_CELL_POPULATION_PROLIFERATION	GOBP_NEGATIVE_REGULATION_OF_CELL_POPULATION_PROLIFERATION	488	0.460946	1.44208	3.83378e-07	5.50627e-05	4.43104e-05	2537	tags=26%, list=18%, signal=22%	CAV1/THBS1/ROBO1/CDH5/GREM1/WNT5A/GATA6/IGFBP7/SCG2/IGFBP3/FAP/ADM/SNAI2/IGFBP5/PODN/F2R/SOD2/TGFB2/ETS1/NUPR1/TP53I11/MN1/GJA1/NDN/CDH13/RARB/FLT1/PTGES/TPBG/SERPINF1/CD164/TYROBP/TFF1/ADAMTS1/SFRP1/INPPL1/SFRP2/COL4A3/B4GALT1/HMOX1/APOD/TGFB3/RPS6KA2/ANG/CD80/SULF1/SPRY1/SOX9/PTPRM/SPARC/PDPN/BTG2/CNOT7/SIX5/PPP2R5C/BCHE/NOX4/PTHLH/INTU/BMPR1B/HNF4A/SERPINE2/AR/AZGP1/NLRC3/FTH1/B2M/LIF/NOS3/CEB…
GOBP_NEGATIVE_REGULATION_OF_EPITHELIAL_CELL_PROLIFERATION	GOBP_NEGATIVE_REGULATION_OF_EPITHELIAL_CELL_PROLIFERATION	98	0.613137	1.8203	4.25354e-07	5.96015e-05	4.79629e-05	2255	tags=34%, list=16%, signal=28%	CAV1/THBS1/ROBO1/WNT5A/SCG2/SNAI2/TGFB2/NUPR1/GJA1/FLT1/SERPINF1/SFRP1/SFRP2/COL4A3/SULF1/SOX9/PTPRM/SPARC/INTU/AR/NLRC3/B2M/KLF9/CD109/EREG/FGFR2/WDR77/CAV2/AQP11/MEF2C/GPC3/PTPRK/CCL2
GOBP_VASCULAR_PROCESS_IN_CIRCULATORY_SYSTEM	GOBP_VASCULAR_PROCESS_IN_CIRCULATORY_SYSTEM	165	0.558436	1.70739	5.3428e-07	7.22346e-05	5.81292e-05	2602	tags=38%, list=19%, signal=31%	PDE3A/CAV1/CDH5/SLC2A3/ADM/ABCC9/FERMT2/F2R/SOD2/SLC12A2/OCLN/AKAP12/GJA1/DOCK4/GJA5/CD36/SLC6A20/SLC1A3/EDNRA/SLC15A2/VEGFA/ACTA2/TJP3/SLC7A2/OXTR/ATP8A1/ANGPT1/SOD1/TFRC/PTAFR/NOS3/HTR2B/SLC16A7/RGS2/GCLC/SLC16A1/SLC1A4/KCNMA1/KLF2/ABCB1/KCNJ8/CD38/KCNMB2/ADRB2/SLC5A1/FOXC1/P2RY1/SLC44A1/COMP/ADORA1/ITGA1/EXT2/EDNRB/SLC8A1/GPX1/AVPR1A/SCPEP1/ACE2/BBS2/GCLM/KCNMB4/ATG5
GOBP_G_PROTEIN_COUPLED_RECEPTOR_SIGNALING_PATHWAY	GOBP_G_PROTEIN_COUPLED_RECEPTOR_SIGNALING_PATHWAY	446	0.467934	1.46117	5.4066e-07	7.22346e-05	5.81292e-05	2307	tags=27%, list=17%, signal=23%	PDE3A/CAV1/CPE/CXCL6/ANXA1/GNAI1/ADM/PDGFRB/F2R/PDE10A/FLNA/IQGAP2/SLC12A2/FZD4/AKAP12/DGKG/GNG11/GLRB/CCRL2/S1PR1/ZDHHC7/F2RL2/C3/TGM2/ESR1/LPAR1/LGR4/EDNRA/DGKI/FZD8/PLCL1/ARHGEF5/GNG7/GNAI2/SAA1/APLP1/FPR1/ABCA1/PDE4B/GNG4/SLC39A14/USP20/OXTR/C3AR1/DEFB1/CXCL16/PRKACB/SUCNR1/LGR5/FZD1/PTHLH/ARHGEF17/PDGFRL/GNAZ/GNG2/PREX1/PLCB4/RASD1/PTAFR/GNG12/GNAS/HTR2B/GPR135/CXCL1/GPRC5B/PTGER2/CA2/KALRN/…
GOMF_CALCIUM_ION_BINDING	GOMF_CALCIUM_ION_BINDING	424	0.469489	1.46423	5.74716e-07	7.37994e-05	5.93884e-05	2258	tags=24%, list=16%, signal=21%	C1R/DYSF/SPOCK1/EFEMP1/THBS1/C1S/CDH5/FSTL1/NIN/SYT13/ANXA1/FAT3/EDIL3/LTBP2/SVEP1/HEG1/CD248/ANXA10/CDH2/PLS3/SPARCL1/LTBP1/PPP2R3A/NKD1/NELL2/PCDH18/CD93/FBLN5/DGKG/NID2/VLDLR/CDH13/RHOT2/PCDHB6/ASPN/ANXA4/S100A8/SYT7/NOTCH3/EDEM3/DSC3/CALML4/FKBP10/SULF1/TBC1D8B/RCN3/NID1/EFHD1/RAB11FIP3/SPARC/EFCAB2/FLG/IDS/SLC25A24/PLA2G12A/EFHD2/SPOCK2/HSPA5/RHOT1/LCP1/PLCB4/PCDH9/PLSCR1/PPP3CB/HMCN1/ENPP2/…
GOBP_REGULATION_OF_HUMORAL_IMMUNE_RESPONSE	GOBP_REGULATION_OF_HUMORAL_IMMUNE_RESPONSE	43	0.723284	1.96993	5.78063e-07	7.37994e-05	5.93884e-05	1317	tags=35%, list=9%, signal=32%	C1R/CFH/C1S/GATA6/C7/A2M/PTPRC/C3/C4B/C1QC/SPINK5/C1QB/C3AR1/CFB/C6
GOBP_MULTICELLULAR_ORGANISMAL_HOMEOSTASIS	GOBP_MULTICELLULAR_ORGANISMAL_HOMEOSTASIS	374	0.486085	1.51066	6.68372e-07	8.34739e-05	6.71737e-05	2522	tags=30%, list=18%, signal=26%	LAMA4/CAV1/LYZ/CDH5/PDGFC/PECAM1/PTGS2/SPP1/CLDN18/F2R/ZNF423/AKT3/SLC12A2/OCLN/GJA1/NOVA1/SLC40A1/NDN/ACTG1/LAMA2/PTGES/PRCP/SGIP1/S1PR1/TFF1/NR4A3/CD36/USH1C/ADAM17/LGR4/PLCL1/FOXO1/LIPA/VEGFA/TFF2/PRKAA1/RCN3/ITGB1/TJP3/OXTR/ABCA12/SOX9/ANGPT1/IL18R1/MAP2K6/WWTR1/PRKACB/SOD1/FLG/SASH3/ELOVL6/TFRC/LAMC1/AZGP1/GNAS/B2M/NOS3/CEBPB/LDB2/IL20RB/IL6/ZG16B/CA2/MEX3C/HAS2/LPCAT1/IL18/ADAMTS5/TLR4/RAB1…
GOBP_CELL_CHEMOTAXIS	GOBP_CELL_CHEMOTAXIS	206	0.531318	1.63294	7.03131e-07	8.59466e-05	6.91635e-05	2255	tags=30%, list=16%, signal=26%	THBS1/CXCL6/GREM1/WNT5A/RARRES2/ANXA1/SCG2/SERPINE1/PDGFRB/TGFB2/NRP1/SLC12A2/IL16/FLT1/CCRL2/S1PR1/TPBG/LGALS3/DOCK4/PRKD1/DUSP1/MCU/ADAM17/LPAR1/S100A8/PDGFRA/SAA1/SEMA5A/VEGFA/PDE4B/C3AR1/CXCL16/VEGFC/PREX1/LGMN/CYP7B1/CXCL1/PDGFD/IL6/BST1/CCL18/CRKL/FGF1/PRKCQ/CX3CR1/CAMK1D/PIP5K1A/CCL22/GAB1/CXCL11/CCL11/LGALS9/SRP54/CSF3R/MET/ITGA1/FCER1G/EDNRB/TIAM1/CCR1/ADAM8/CCL2
GOBP_LEUKOCYTE_MIGRATION	GOBP_LEUKOCYTE_MIGRATION	316	0.500942	1.55084	7.19457e-07	8.611e-05	6.92951e-05	2328	tags=28%, list=17%, signal=24%	CAV1/THBS1/CXCL6/GREM1/PECAM1/IL1R1/WNT5A/RARRES2/ANXA1/FN1/SCG2/SERPINE1/SLC16A3/TREM1/TGFB2/SLC12A2/IL16/SDC2/FLT1/S1PR1/LGALS3/DUSP1/PLVAP/MCU/LCK/ADAM17/S100A8/SMPD3/B4GALT1/ECM1/HMOX1/APOD/SAA1/VEGFA/PDE4B/HCK/FUT4/ITGB1/MSN/C3AR1/ANGPT1/CXCL16/VEGFC/ATP1B1/PREX1/MYH9/PTAFR/LGMN/TNFRSF10D/MERTK/CYP7B1/CXCL1/PDGFD/IL6/BST1/CCL18/CRKL/SLC16A1/CX3CR1/CAMK1D/CCL22/IL33/SHC1/COL1A2/MMP9/TNFRSF10A…
GOBP_POSITIVE_REGULATION_OF_MAPK_CASCADE	GOBP_POSITIVE_REGULATION_OF_MAPK_CASCADE	354	0.485804	1.50796	7.53514e-07	8.83457e-05	7.10942e-05	2804	tags=31%, list=20%, signal=25%	THBS1/ROBO1/PDGFC/WNT5A/CHI3L1/TAB2/IGFBP3/FERMT2/CDH2/PDGFRB/F2R/TGFB2/NRP1/ABCA7/FZD4/AKAP12/LAPTM5/MDFIC/FLT1/HIPK2/UNC5CL/TPBG/SPI1/CDON/PTPRC/CD36/LPAR1/PDGFRA/TGFB3/ARHGEF5/GADD45B/GNAI2/SAA1/PEA15/VEGFA/FPR1/PRKAA1/MLKL/CLEC7A/TLR6/ANGPT1/CD40/MAP2K6/SOD1/MAPK10/ARL6IP5/DVL3/AR/MAPKAPK2/LIF/HTR2B/SH3RF2/MAPK8IP1/PDGFD/IL6/NRG1/DUSP19/CCL18/TLR4/TRAF1/CRKL/FGF1/IGF1R/SORBS3/TGFA/FGFR2/DKK1/…
GOBP_REGULATION_OF_RESPONSE_TO_WOUNDING	GOBP_REGULATION_OF_RESPONSE_TO_WOUNDING	112	0.593834	1.78287	7.81472e-07	8.97911e-05	7.22574e-05	1307	tags=25%, list=9%, signal=23%	CAV1/PHLDB2/THBS1/MYLK/TSPAN8/ANXA1/SERPINE1/FAP/SPP1/FERMT2/F2R/FLNA/SLC12A2/PLAU/OCLN/GJA1/ACTG1/CD36/PDGFRA/CLEC7A/ITGB1/PLAT/WNT4/ATP7A/SERPINE2/NOS3/CLASP1/CD109
GOBP_DEVELOPMENTAL_GROWTH	GOBP_DEVELOPMENTAL_GROWTH	436	0.470662	1.46916	8.30142e-07	9.3513e-05	7.52525e-05	2362	tags=26%, list=17%, signal=23%	SEMA3C/NIN/WNT5A/DDR2/GATA6/ANXA1/FN1/BASP1/MAP1B/SPP1/GAS1/HEG1/ADM/ZFPM2/PDGFRB/TGFB2/NRP1/PTX3/NKD1/GJA1/NRP2/NDN/RARB/S1PR1/BNC2/DIO3/ESR1/SFRP1/SFRP2/SMPD3/TEC/TNC/STRA6/SEMA3D/ECM1/APOD/SEMA5A/POSTN/CPNE5/SEMA3E/LAMB2/SEMA3F/VEGFA/SPRY1/CHST11/BCL2L11/OLFM1/WDR11/SOX9/PKDCC/AGR2/WWTR1/SOD1/SASH3/EVC/GINS4/DBN1/KAT2A/STC1/BMPR1B/WASF1/AR/RPS6KB1/WWC2/GLI1/LGMN/GNAS/ALCAM/PPP3CB/NCAPG2/MEX3C/…
GOBP_SUPEROXIDE_METABOLIC_PROCESS	GOBP_SUPEROXIDE_METABOLIC_PROCESS	49	0.703218	1.94827	9.23302e-07	0.000102007	8.20879e-05	1278	tags=35%, list=9%, signal=32%	CYBB/SOD2/FBLN5/H19/TYROBP/CD36/NQO1/GNAI2/CLEC7A/SOD1/NOX4/SH3PXD2B/ATP7A/PREX1/NOS3/NCF2/BST1
GOBP_CELLULAR_RESPONSE_TO_KETONE	GOBP_CELLULAR_RESPONSE_TO_KETONE	75	0.644457	1.8702	1.00498e-06	0.000108936	8.76637e-05	1998	tags=37%, list=14%, signal=32%	SGK1/ERRFI1/SPP1/GNAI1/NCOA4/SERPINF1/SFRP1/AACS/TNC/FOXO1/FBXO32/PRKAA1/MSN/TNFSF4/GNG2/NR3C1/AR/RPS6KB1/FECH/PTGER2/KLF9/ELK1/KLF2/PTGFR/DDIT4/ADCY5/NDOR1/AKR1C2
GOBP_CELL_JUNCTION_ASSEMBLY	GOBP_CELL_JUNCTION_ASSEMBLY	316	0.497154	1.53911	1.17222e-06	0.000124711	0.000100359	3351	tags=36%, list=24%, signal=28%	FLRT2/CAV1/PHLDB2/THBS1/CDH5/GREM1/PECAM1/WNT5A/GJC1/FN1/MAP1B/PTPRD/HEG1/SNAI2/FERMT2/CLDN18/CDH2/FLNA/NRP1/OCLN/GJA1/ACTG1/TPBG/EPHB3/GJA5/PCDHB6/SFRP1/EPHA3/APOD/VEGFA/AMIGO2/OXTR/GNPAT/LIMS1/FZD1/SLC9A1/PLXND1/WNT4/SPOCK2/PRKCI/SNAI1/NLGN2/ARF6/LAMC1/UBE2V2/DLC1/CLASP1/VMP1/PCDHB5/SRPX2/DST/CRKL/PDPK1/PIP5K1A/MYO1C/PCDHB16/SLITRK4/UGT8/LRFN5/PDLIM5/CLDN1/PKP4/FBLIM1/EIF4G1/MARVELD2/ARHGAP6/PC…
GOBP_POSITIVE_REGULATION_OF_VASCULATURE_DEVELOPMENT	GOBP_POSITIVE_REGULATION_OF_VASCULATURE_DEVELOPMENT	121	0.589552	1.77874	1.22356e-06	0.000126771	0.000102016	1901	tags=31%, list=14%, signal=27%	THBS1/CDH5/GREM1/WNT5A/CHI3L1/GATA6/SERPINE1/ADM/AKT3/CYBB/ETS1/HSPB6/FLT1/HIPK2/PRKD1/C3/SFRP2/ECM1/HMOX1/SEMA5A/VEGFA/TNFSF12/ITGB1/C3AR1/CD40/VEGFC/NOS3/FGF1/F3/CX3CR1/ENG/PDPK1/HMGA2/GAB1/ITGAX/CCL11/ADAM12
GOBP_CELLULAR_RESPONSE_TO_LIPID	GOBP_CELLULAR_RESPONSE_TO_LIPID	398	0.470602	1.46391	1.24067e-06	0.000126771	0.000102016	2541	tags=27%, list=18%, signal=22%	VIM/SGK1/CXCL6/WNT5A/ANXA1/PAQR8/ERRFI1/SERPINE1/SPP1/GNAI1/CMPK2/SNAI2/PGR/FZD4/MN1/NCOA4/LCOR/HEYL/SERPINF1/NR4A3/CD36/ESR1/SFRP1/EPHA3/LPAR1/AACS/CD14/UBE2L3/TNC/FOXO1/CD80/FBXO32/AXL/BCL2L11/CD180/KAT5/PDE4B/HCK/STRN3/MSN/SOX9/TNIP3/CD40/ANKRD1/PER1/TNFSF4/STC1/PID1/SCARB1/NR3C1/AR/RPS6KB1/HDAC1/PTAFR/CEBPB/CYP7B1/PDCD4/MGST1/CXCL1/FECH/IL6/KLF9/PDCD1LG2/IL18/TLR4/PAF1/ELK1/CX3CR1/FGFR2/PAK1/…
GOBP_REGULATION_OF_BODY_FLUID_LEVELS	GOBP_REGULATION_OF_BODY_FLUID_LEVELS	337	0.481253	1.49346	1.25778e-06	0.000126771	0.000102016	2993	tags=37%, list=22%, signal=30%	CAV1/THBS1/TSPAN8/GATA6/FN1/SERPINE1/FAP/HEG1/ADM/ZFPM2/VWF/F2R/FLNA/PLAU/A2M/GJA1/DGKG/ACTG1/PRCP/TRPC6/F2RL2/GJA5/CD36/TFPI2/LCK/TEC/DGKI/PDGFRA/HPS5/GNAI2/SAA1/AXL/VEGFA/OXTR/ABCA12/PLAT/CD40/PDPN/AGR2/PRKACB/FLG/LMAN1/PAFAH2/GNG2/ATP7A/MYH9/HNF4A/SERPINE2/HDAC1/DTNBP1/PLSCR1/GNAS/NOS3/MERTK/IL6/KALRN/HAS2/TLR4/ENTPD1/RAB11FIP2/PRKCQ/F3/F8/LCP2/MPL/PDPK1/ZNF385A/SCNN1A/GNA12/GRHL1/COL1A2/ITPR2…
GOMF_EXTRACELLULAR_MATRIX_BINDING	GOMF_EXTRACELLULAR_MATRIX_BINDING	44	0.711534	1.94501	1.40832e-06	0.000139497	0.000112257	968	tags=43%, list=7%, signal=40%	THBS1/SPP1/SSC5D/CD248/LGALS1/SPARCL1/CTSS/OLFML2A/LGALS3/CLEC14A/BGN/ECM1/VEGFA/ITGB1/TGFBI/NID1/SPARC/ELN/SPOCK2
GOBP_OUTFLOW_TRACT_SEPTUM_MORPHOGENESIS	GOBP_OUTFLOW_TRACT_SEPTUM_MORPHOGENESIS	20	0.833293	2.01778	1.78569e-06	0.000173878	0.000139924	285	tags=40%, list=2%, signal=39%	ROBO1/SEMA3C/GATA6/ZFPM2/TGFB2/NRP1/NRP2/RARB
GOBP_CARDIAC_CHAMBER_DEVELOPMENT	GOBP_CARDIAC_CHAMBER_DEVELOPMENT	115	0.584841	1.76233	2.00574e-06	0.000189498	0.000152495	2949	tags=37%, list=21%, signal=30%	CPE/ROBO1/SEMA3C/WNT5A/GATA6/HEG1/ZFPM2/TGFB2/NRP1/NRP2/RARB/HEYL/GJA5/ADAMTS1/CITED2/SFRP2/STRA6/PLXND1/ANK2/DHRS3/NRG1/SNX17/ENG/FGFR2/MIR17HG/PTK7/FOXC1/HES1/SHOX2/MEF2C/COL11A1/SOX4/GATA4/SMO/LMO4/NOTCH2/TGFBR3/SALL1/HIF1A/SLIT2/NPRL3/FOXF1/TMEM65
GOBP_REGULATION_OF_CELL_PROJECTION_ORGANIZATION	GOBP_REGULATION_OF_CELL_PROJECTION_ORGANIZATION	479	0.452899	1.41595	2.01208e-06	0.000189498	0.000152495	3240	tags=34%, list=23%, signal=27%	CAV1/VIM/SPOCK1/ROBO1/SEMA3C/NIN/WNT5A/FN1/MAP1B/SPP1/CREB3L2/PTPRD/RDX/CDH2/LGALS1/FLNA/NRP1/FZD4/OCLN/DGKG/MARK1/VLDLR/SDC2/CEP120/PLXNC1/CDC42EP5/EPHB3/PFN2/TRPC6/PFN1/PRKD1/SERPINF1/DENND5A/STMN2/SFRP1/USH1C/EPHA3/LPAR1/SFRP2/CRMP1/FXR1/SEMA3D/NEGR1/LRRC4C/TGFB3/SEMA5A/SEMA3E/SEMA3F/VEGFA/DZIP1/LZTS1/PDPN/FZD1/ANKRD1/PLXND1/DBN1/KAT2A/HSPA5/PRKCI/ATP7A/MYO10/PREX1/DVL3/ARF6/ADAMTS16/UBE2V2/B2…
GOBP_COMPLEMENT_ACTIVATION	GOBP_COMPLEMENT_ACTIVATION	38	0.737165	1.97238	2.07048e-06	0.000191853	0.000154389	1317	tags=37%, list=9%, signal=33%	C1R/CFH/C1S/C7/A2M/MFAP4/IGLL5/C3/C4B/C1QC/C1QB/C3AR1/CFB/C6
GOBP_COLLAGEN_METABOLIC_PROCESS	GOBP_COLLAGEN_METABOLIC_PROCESS	66	0.647243	1.85863	2.10603e-06	0.00019205	0.000154548	2175	tags=44%, list=16%, signal=37%	VIM/ADAMTS2/ERRFI1/FAP/COL15A1/PDGFRB/F2R/SERPINH1/CTSS/MFAP4/MRC2/MMP2/MMP15/SMPD3/TGFB3/RCN3/ITGB1/WNT4/IL6/ENG/COL1A2/MMP9/HDAC2/COL1A1/COL5A1/CREB3L1/MYB/CTSD/ADAMTS3
GOBP_REGULATION_OF_WOUND_HEALING	GOBP_REGULATION_OF_WOUND_HEALING	88	0.615289	1.81114	2.42631e-06	0.000217056	0.000174671	1460	tags=30%, list=11%, signal=27%	CAV1/PHLDB2/THBS1/MYLK/TSPAN8/ANXA1/SERPINE1/FAP/FERMT2/F2R/SLC12A2/PLAU/OCLN/GJA1/ACTG1/CD36/PDGFRA/CLEC7A/ITGB1/PLAT/WNT4/SERPINE2/NOS3/CLASP1/CD109/F3
GOMF_RECEPTOR_REGULATOR_ACTIVITY	GOMF_RECEPTOR_REGULATOR_ACTIVITY	216	0.515875	1.58538	2.46166e-06	0.000217056	0.000174671	1872	tags=26%, list=13%, signal=23%	FLRT2/EFEMP1/SEMA3C/CXCL6/GREM1/PDGFC/WNT5A/PXDN/SCG2/SPP1/ADM/TGFB2/IL16/LGALS3/TFF1/SFRP2/SEMA3D/TGFB3/DKK3/SEMA5A/SEMA3E/NAMPT/SEMA3F/VEGFA/FST/TNFSF12/MTRNR2L2/OSGIN2/CXCL16/VEGFC/CTF1/PTHLH/WNT4/TNFSF4/HDGF/STC1/LIF/CXCL1/PDGFD/IL6/NRG1/CCL18/IL18/FGF1/CMTM3/EREG/TGFA/DKK1/CCL22/IL33/MTRNR2L9/SEMA6D/CXCL11/CCL11/FBN1/DUT
GOBP_CELL_SUBSTRATE_ADHESION	GOBP_CELL_SUBSTRATE_ADHESION	287	0.491022	1.51733	2.49359e-06	0.000217056	0.000174671	2364	tags=28%, list=17%, signal=23%	PHLDB2/SPOCK1/BVES/THBS1/GREM1/FN1/SERPINE1/EDIL3/FERMT2/VWF/LGALS1/FLNA/NRP1/PLAU/FZD4/TMEM8B/FBLN5/NID2/ACTG1/CDH13/ACER2/EPHB3/CD36/SFRP1/EPHA3/PKHD1/APOD/CCDC80/POSTN/SEMA3E/LAMB2/AXL/VEGFA/BCL2L11/ITGB1/ECM2/NID1/ANGPT1/PDPN/AGR2/RASA1/ADAMTS9/LIMS1/LAMB1/ITGBL1/SLC9A1/WNT4/SPOCK2/SGCE/PREX1/LAMC1/MERTK/DLC1/CLASP1/BST1/HAS2/CRKL/NDNF/ANTXR1/SORBS3/PARVB/PDPK1/PIP5K1A/COL1A1/FER/ITGA8/ARHGAP…
GOBP_PEPTIDYL_TYROSINE_MODIFICATION	GOBP_PEPTIDYL_TYROSINE_MODIFICATION	272	0.493843	1.5246	2.56494e-06	0.000219934	0.000176987	1764	tags=24%, list=13%, signal=21%	CAV1/EFEMP1/GREM1/PDGFC/PECAM1/DDR2/ERRFI1/PDGFRB/NRP1/BAZ1B/FLT1/HIPK2/EPHB3/PTPRC/CLK1/CD36/SFRP1/EPHA3/LCK/ADAM17/SH3BP5/SFRP2/FGR/TEC/PDGFRA/CD80/AXL/VEGFA/HCK/CLEC7A/ANGPT1/PKDCC/CD40/MAP2K6/CNOT7/CTF1/NOX4/ARL2BP/TPST2/LIF/MERTK/PDGFD/ENPP2/IL6/GPRC5B/CNTN1/NRG1/BST1/NCAPG2/ABI2/MELK/IL18/ZFYVE28/IGF1R/CAMKK2/RELN/EREG/TGFA/FGFR2/ERBB3/SHC1/HDAC2/FER/PRLR/ABL2
GOMF_COLLAGEN_BINDING	GOMF_COLLAGEN_BINDING	56	0.667404	1.88466	2.70139e-06	0.000227299	0.000182913	780	tags=34%, list=6%, signal=32%	THBS1/DDR2/FN1/VWF/PODN/COL6A2/SPARCL1/COL14A1/SERPINH1/CTSS/NID2/MRC2/ASPN/ITGB1/AEBP1/TGFBI/ECM2/NID1/SPARC
GOBP_CARTILAGE_DEVELOPMENT	GOBP_CARTILAGE_DEVELOPMENT	134	0.564757	1.7075	2.72996e-06	0.000227299	0.000182913	2188	tags=31%, list=16%, signal=27%	EFEMP1/GREM1/WNT5A/CHI3L1/TRPS1/CREB3L2/SNAI2/SERPINH1/RARB/PITX1/SFRP2/BGN/SMPD3/ECM1/SULF1/RUNX2/CHST11/SLC39A14/TGFBI/SOX9/PKDCC/MBOAT2/PTHLH/EVC/KAT2A/ATP7A/STC1/SNAI1/BMPR1B/GNAS/CSGALNACT1/MEX3C/ADAMTS7/PRRX1/HMGA2/COL1A1/COMP/SHOX2/MEF2C/COL11A1/ACVRL1/TAPT1
GOBP_RESPONSE_TO_STEROID_HORMONE	GOBP_RESPONSE_TO_STEROID_HORMONE	233	0.509945	1.56973	2.81157e-06	0.000230749	0.00018569	2931	tags=30%, list=21%, signal=24%	CAV1/THBS1/SGK1/ANXA1/PAQR8/IGFBP7/ERRFI1/SPP1/ADM/CYBB/TGFB2/PGR/NCOA4/HEYL/SERPINF1/DUSP1/NR4A3/ESR1/SFRP1/UBE2L3/FOXO1/TGFB3/FBXO32/BCL2L11/STRN3/OXTR/PAPPA/SPARC/BCHE/IDH1/PER1/STC1/NR3C1/AR/RPS6KB1/HDAC1/PTAFR/CYP7B1/FECH/IL6/CA2/KLF9/ENG/CD38/PAK1/PGRMC2/CASP3/DAB2/COL1A1/UFL1/CCND1/CLDN1/DDIT4/ZFP36L1/CARM1/RXRB/AVPR1A/DDX54/PIAS2/PMEPA1/AGL/NR2C1/TP63/IGFBP2/NCOR2/BRCA1/SOX30/SLIT2/PCK2/P…
GOBP_REGULATION_OF_MAPK_CASCADE	GOBP_REGULATION_OF_MAPK_CASCADE	493	0.450181	1.40929	2.94071e-06	0.000237949	0.000191484	2346	tags=25%, list=17%, signal=21%	CAV1/THBS1/ROBO1/PDGFC/WNT5A/CHI3L1/ERRFI1/TAB2/FN1/IGFBP3/UCHL1/FERMT2/CDH2/PDGFRB/F2R/TGFB2/NRP1/ABCA7/FZD4/AKAP12/LAPTM5/MDFIC/FLT1/HIPK2/UNC5CL/TPBG/SPI1/CDON/PTPRC/DUSP1/CD36/SFRP1/LPAR1/SFRP2/PKHD1/GPS1/MECOM/FOXO1/PDGFRA/TGFB3/ARHGEF5/TIMP3/GADD45B/GNAI2/SAA1/PEA15/VEGFA/FPR1/SPRY1/PRKAA1/MLKL/CLEC7A/TLR6/ANGPT1/CD40/FAS/MAP2K6/SOD1/MAPK10/PER1/ARL6IP5/IGBP1/DVL3/AR/MAPKAPK2/LIF/HTR2B/SH3R…
GOBP_TISSUE_MIGRATION	GOBP_TISSUE_MIGRATION	251	0.499105	1.53881	3.04694e-06	0.00024312	0.000195646	1403	tags=20%, list=10%, signal=19%	THBS1/ROBO1/CDH5/GREM1/FSTL1/WNT5A/ANXA1/SCG2/FAP/PTGS2/AKT3/TGFB2/NRP1/ETS1/ZEB2/NRP2/CDH13/PRCP/PFN2/PFN1/PRKD1/SERPINF1/CLEC14A/ADAM17/HMOX1/SEMA5A/VEGFA/ACTA2/TNFSF12/SOX9/PTPRM/ANGPT1/GLUL/SPARC/CD40/MMRN2/VEGFC/ADAMTS9/RHOJ/PLXND1/STC1/MYH9/SCARB1/ARF6/LGMN/NOS3/CLASP1/ENPP2/HAS2/SRPX2/FGF1
GOCC_BLOOD_MICROPARTICLE	GOCC_BLOOD_MICROPARTICLE	57	0.677501	1.91407	3.6329e-06	0.000285904	0.000230075	2110	tags=44%, list=15%, signal=37%	C1R/CFH/C1S/FN1/A2M/ACTG1/PFN1/C3/C4B/C1QC/PRSS1/ZBTB38/MSN/C1QB/BCHE/TFRC/CFB/HSPA1B/STOM/CP/ENG/APOL1/HSPA8/SERPING1/ACTB
GOBP_REGULATION_OF_CELL_SUBSTRATE_ADHESION	GOBP_REGULATION_OF_CELL_SUBSTRATE_ADHESION	178	0.539456	1.65007	3.70952e-06	0.000287989	0.000231752	1419	tags=23%, list=10%, signal=21%	PHLDB2/SPOCK1/THBS1/GREM1/FN1/SERPINE1/EDIL3/FERMT2/LGALS1/FLNA/NRP1/PLAU/FZD4/ACTG1/CDH13/ACER2/CD36/SFRP1/EPHA3/PKHD1/APOD/CCDC80/POSTN/SEMA3E/VEGFA/ECM2/NID1/PDPN/AGR2/RASA1/LIMS1/SLC9A1/WNT4/SPOCK2/PREX1/DLC1/CLASP1/BST1/HAS2/CRKL/NDNF
GOBP_MUSCLE_SYSTEM_PROCESS	GOBP_MUSCLE_SYSTEM_PROCESS	264	0.495917	1.53121	4.25142e-06	0.000321431	0.000258665	3014	tags=35%, list=22%, signal=28%	CAV1/DYSF/VIM/MYLK/GATA6/GJC1/ERRFI1/KCNE3/TPM2/MYH11/IGFBP5/F2R/FLNA/HSPB6/GJA1/DOCK4/GJA5/NR4A3/CALD1/EDNRA/DTNA/FOXO1/HMOX1/FBXO32/STAC/SULF1/ACTA2/CACNA1H/PDE4B/OXTR/TMOD1/MAP2K6/SOD1/SCN7A/ATP1B1/SLC9A1/STC1/ANK2/RPS6KB1/PTAFR/NOS3/HTR2B/CAMK2G/SSPN/ORMDL3/TMOD3/RGS2/AKAP9/SORBS3/CALCRL/RGS4/KCNMA1/CLIC2/KCNJ8/CD38/MIR17HG/PAK1/ADRB2/RNF207/LMOD1/HDAC2/ENO1/PDLIM5/HSBP1/P2RY1/COMP/PIK3CA/ADO…
GOBP_CARDIAC_SEPTUM_DEVELOPMENT	GOBP_CARDIAC_SEPTUM_DEVELOPMENT	80	0.616334	1.79573	4.25218e-06	0.000321431	0.000258665	2909	tags=40%, list=21%, signal=32%	ROBO1/SEMA3C/WNT5A/GATA6/HEG1/ZFPM2/TGFB2/NRP1/NRP2/RARB/HEYL/GJA5/CITED2/STRA6/PLXND1/ANK2/DHRS3/SNX17/ENG/FGFR2/MIR17HG/PTK7/HES1/SOX4/GATA4/SMO/LMO4/NOTCH2/TGFBR3/SALL1/SLIT2/NPRL3
GOBP_REGULATION_OF_CELL_JUNCTION_ASSEMBLY	GOBP_REGULATION_OF_CELL_JUNCTION_ASSEMBLY	148	0.554597	1.68352	5.07263e-06	0.000378471	0.000304566	2766	tags=33%, list=20%, signal=27%	FLRT2/CAV1/PHLDB2/THBS1/GREM1/WNT5A/PTPRD/SNAI2/FERMT2/NRP1/OCLN/GJA1/ACTG1/TPBG/EPHB3/SFRP1/EPHA3/APOD/VEGFA/AMIGO2/OXTR/LIMS1/SLC9A1/WNT4/SNAI1/NLGN2/ARF6/UBE2V2/DLC1/CLASP1/SRPX2/MYO1C/SLITRK4/LRFN5/PDLIM5/CLDN1/EIF4G1/ARHGAP6/PRKCH/MEF2C/ACVRL1/GPC4/ACE2/BDNF/FLOT1/AGT/DAPK3/MMP14/RAPGEF1
GOBP_RESPONSE_TO_RETINOIC_ACID	GOBP_RESPONSE_TO_RETINOIC_ACID	71	0.630246	1.82571	6.02829e-06	0.000444007	0.000357305	2155	tags=34%, list=16%, signal=29%	WNT5A/GATA6/IGFBP7/HSD17B2/PDGFRB/FZD4/GJA1/ACER2/PTGES/SERPINF1/DUSP1/EPHA3/TNC/SOX9/FGFR2/CD38/PTK7/HDAC2/COL1A1/ABL2/CREB1/AQP3/MYB/RXRB
GOBP_OSSIFICATION	GOBP_OSSIFICATION	287	0.484522	1.49724	6.32524e-06	0.000454821	0.000366007	3096	tags=33%, list=22%, signal=27%	GREM1/WNT5A/DDR2/SRGN/IGFBP3/SPP1/SNAI2/FERMT2/IGFBP5/TGFB2/MN1/S1PR1/MRC2/PRKD1/SFRP1/INPPL1/MMP2/SFRP2/ASPN/LGR4/FGR/SMPD3/TNC/ECM1/TGFB3/RUNX2/NAB2/BCAP29/SOX9/SPARC/PKDCC/VEGFC/WWTR1/FZD1/PTHLH/WNT4/EGR2/INTU/STC1/SNAI1/BMPR1B/GLI1/DHRS3/GNAS/WWOX/CEBPB/IL6/FSTL3/CSGALNACT1/SYNCRIP/CLTC/FGFR2/DKK1/COL1A2/ADRB2/MMP9/BAMBI/COL1A1/UFL1/CREB3L1/COL6A1/ASF1A/FOXC1/ANKH/COMP/SHOX2/MEF2C/GPC3/COL11A…
GOBP_CARDIAC_CHAMBER_MORPHOGENESIS	GOBP_CARDIAC_CHAMBER_MORPHOGENESIS	84	0.610586	1.78155	6.33345e-06	0.000454821	0.000366007	2947	tags=39%, list=21%, signal=31%	CPE/ROBO1/SEMA3C/WNT5A/GATA6/HEG1/ZFPM2/TGFB2/NRP1/NRP2/RARB/HEYL/ADAMTS1/CITED2/SFRP2/DHRS3/NRG1/ENG/FGFR2/MIR17HG/FOXC1/HES1/SHOX2/MEF2C/COL11A1/SOX4/GATA4/SMO/NOTCH2/TGFBR3/HIF1A/SLIT2/FOXF1
GOBP_MORPHOGENESIS_OF_AN_EPITHELIUM	GOBP_MORPHOGENESIS_OF_AN_EPITHELIUM	416	0.459939	1.43406	6.53262e-06	0.000459096	0.000369447	3318	tags=35%, list=24%, signal=27%	PHLDB2/SEMA3C/GREM1/WNT5A/ADM/FERMT2/IGFBP5/FLNA/TGFB2/NRP1/COL4A1/NKD1/PGR/FZD4/GJA1/ALDH1A3/ACTG1/ZDHHC7/PFN1/TCTN1/TGM2/ESR1/SFRP1/ADAM17/SFRP2/PKHD1/LGR4/EDNRA/TNC/SEMA3E/SULF1/VEGFA/KRT17/SPRY1/FST/MSN/SOX9/PDPN/VEGFC/PRKACB/LGR5/FZD1/PLXND1/WNT4/MTHFR/MIB1/KAT2A/INTU/ATP7A/ARHGAP12/SNAI1/DVL3/AR/ADAMTS16/LIF/PODXL/DLC1/CYP7B1/CLASP1/AHI1/SHROOM3/FGF1/CLTC/PSMD1/PHACTR4/ENG/SEC24B/FGFR2/DKK1…
GOBP_EPITHELIAL_CELL_DEVELOPMENT	GOBP_EPITHELIAL_CELL_DEVELOPMENT	159	0.537957	1.63707	6.59854e-06	0.000459096	0.000369447	2766	tags=35%, list=20%, signal=28%	VIM/CDH5/PECAM1/WNT5A/HEG1/RDX/COL15A1/CDH2/FLNA/PGR/RARB/PALLD/ESR1/PKHD1/B4GALT1/VEZF1/LAMB2/VEGFA/ACTA2/TJP3/MSN/SOX9/TMOD1/SOD1/STC1/HNF4A/AR/PODXL/ABI2/COL18A1/SHROOM3/E2F4/ARHGEF26/S1PR3/ENG/SEC24B/PDPK1/FEM1B/CLIC4/KLF5/CLDN1/MARVELD2/CCM2/MET/PLS1/POF1B/GPX1/SMO/IL6ST/SLC4A7/TP63/NOTCH2/RAB25/RFX3/RAPGEF1
GOBP_NEGATIVE_REGULATION_OF_CHEMOTAXIS	GOBP_NEGATIVE_REGULATION_OF_CHEMOTAXIS	43	0.697916	1.90084	6.63272e-06	0.000459096	0.000369447	621	tags=26%, list=4%, signal=25%	THBS1/ROBO1/SEMA3C/GREM1/WNT5A/NRP1/DUSP1/SEMA3D/SEMA5A/SEMA3E/SEMA3F
GOBP_REGULATION_OF_NEURON_PROJECTION_DEVELOPMENT	GOBP_REGULATION_OF_NEURON_PROJECTION_DEVELOPMENT	322	0.476921	1.47702	7.43332e-06	0.000502405	0.000404299	3238	tags=35%, list=23%, signal=28%	VIM/SPOCK1/ROBO1/SEMA3C/NIN/WNT5A/FN1/MAP1B/SPP1/CREB3L2/PTPRD/CDH2/LGALS1/FLNA/NRP1/DGKG/MARK1/VLDLR/SDC2/PLXNC1/EPHB3/TRPC6/PRKD1/SERPINF1/DENND5A/STMN2/SFRP1/EPHA3/LPAR1/SFRP2/CRMP1/SEMA3D/NEGR1/LRRC4C/SEMA5A/SEMA3E/SEMA3F/VEGFA/LZTS1/FZD1/ANKRD1/PLXND1/DBN1/HSPA5/PRKCI/PREX1/ARF6/UBE2V2/B2M/DPYSL3/CAMK2G/CNTN1/KALRN/ABI2/PRRX1/CHN1/RGS2/CRKL/NDNF/CDK5R1/GDI1/RELN/CAMK1D/CRTC1/CUX1/LIMK1/CD38/…
GOBP_SKELETAL_SYSTEM_DEVELOPMENT	GOBP_SKELETAL_SYSTEM_DEVELOPMENT	342	0.473745	1.47127	7.43332e-06	0.000502405	0.000404299	3097	tags=32%, list=22%, signal=26%	EFEMP1/GREM1/PDGFC/WNT5A/CHI3L1/TRPS1/CREB3L2/SNAI2/CLDN18/ZFAND5/PLS3/TGFB2/GJA1/SERPINH1/RARB/RAB23/PITX1/PTPRC/TYROBP/SFRP1/INPPL1/MMP2/SFRP2/BGN/FGR/SMPD3/ECM1/PDGFRA/TGFB3/PCSK5/SULF1/RUNX2/NAB2/CHST11/FST/ADAMTS4/SLC39A14/TGFBI/SOX9/PKDCC/MBOAT2/SH3PXD2B/PTHLH/EVC/KAT2A/ATP7A/STC1/SNAI1/BMPR1B/DHRS3/GNAS/WWOX/HOXD8/CSGALNACT1/PRELP/MEX3C/SLC9B2/ADAMTS7/HAS2/PRRX1/ENG/FGFR2/ZNF385A/ARID5B/CO…
GOBP_MUSCLE_ORGAN_DEVELOPMENT	GOBP_MUSCLE_ORGAN_DEVELOPMENT	193	0.522668	1.60226	7.61792e-06	0.000508895	0.000409522	3435	tags=37%, list=25%, signal=28%	CAV1/BVES/MYLK/WNT5A/BASP1/HEG1/ZFPM2/COL6A3/TGFB2/NUPR1/CFL2/LAMA2/S1PR1/HEYL/CDON/PITX1/CD164/GPCPD1/FXR1/STRA6/CACNA1H/MRAS/PRKAA1/SGCD/BTG2/CTF1/ANKRD1/EVC/ELN/EGR2/SGCE/RPS6KB1/LIF/NRG1/TAGLN/ENG/FGFR2/ARID5B/ERBB3/HLX/CREB1/KLF5/FOXC1/CAV2/WT1/SHOX2/MEF2C/COL11A1/ITGA7/GPX1/SMO/ID3/HBEGF/FLOT1/TGFBR3/KCNAB1/SMTN/MKX/CRYAB/ZFHX3/HDAC9/LOX/SVIL/GTF3C5/FOS/DAG1/SMAD7/DCN/LEMD2/ZBTB42/BCL9L
GOBP_COAGULATION	GOBP_COAGULATION	233	0.503471	1.5498	7.87373e-06	0.000519938	0.000418408	2619	tags=34%, list=19%, signal=28%	CAV1/THBS1/TSPAN8/GATA6/FN1/SERPINE1/FAP/ZFPM2/VWF/F2R/FLNA/PLAU/A2M/DGKG/ACTG1/PRCP/TRPC6/F2RL2/CD36/TFPI2/LCK/TEC/DGKI/PDGFRA/HPS5/SAA1/AXL/PLAT/CD40/PDPN/PRKACB/LMAN1/PAFAH2/GNG2/MYH9/HNF4A/SERPINE2/HDAC1/DTNBP1/PLSCR1/GNAS/NOS3/MERTK/IL6/TLR4/ENTPD1/PRKCQ/F3/F8/LCP2/MPL/PDPK1/GNA12/COL1A2/ITPR2/HDAC2/COL1A1/PRKAR2B/P2RY1/PRKCH/COMP/SERPING1/PIK3CA/ILK/ACTB/CDC42/FCER1G/MFN2/ARRB1/IRF1/GNA11/C…
GOMF_EXTRACELLULAR_MATRIX_STRUCTURAL_CONSTITUENT_CONFERRING_TENSILE_STRENGTH	GOMF_EXTRACELLULAR_MATRIX_STRUCTURAL_CONSTITUENT_CONFERRING_TENSILE_STRENGTH	29	0.760081	1.96333	8.01875e-06	0.000520169	0.000418595	2573	tags=69%, list=19%, signal=56%	COL4A2/COL15A1/COL6A3/COL6A2/COL4A5/COL4A1/COL14A1/COL4A3/COL18A1/COL24A1/COL1A2/COL4A4/COL1A1/COL5A1/COL6A1/COL11A1/COL7A1/COL21A1/COL3A1/COL12A1
GOBP_REGULATION_OF_COMPLEMENT_ACTIVATION	GOBP_REGULATION_OF_COMPLEMENT_ACTIVATION	32	0.733328	1.92354	8.05833e-06	0.000520169	0.000418595	1317	tags=38%, list=9%, signal=34%	C1R/CFH/C1S/C7/A2M/C3/C4B/C1QC/C1QB/C3AR1/CFB/C6
GOCC_SMALL_RIBOSOMAL_SUBUNIT	GOCC_SMALL_RIBOSOMAL_SUBUNIT	68	-0.474171	-2.02593	8.45411e-06	0.000539654	0.000434274	2517	tags=34%, list=18%, signal=28%	UBA52/RPS5/RPSA/MRPS18A/RPS3A/RPS29/RPS27A/RPS4X/RPS11/MRPS26/MRPS28/MRPS15/RPS3/RPS27/DAP3/RPS28/RPS15A/RPS20/MRPS21/RPS21/MRPS34/RPS23/MRPS31
GOBP_POSITIVE_REGULATION_OF_ENDOTHELIAL_CELL_MIGRATION	GOBP_POSITIVE_REGULATION_OF_ENDOTHELIAL_CELL_MIGRATION	88	0.603324	1.77593	8.65668e-06	0.000546512	0.000439793	1574	tags=27%, list=11%, signal=24%	THBS1/WNT5A/ANXA1/PTGS2/AKT3/NRP1/ETS1/NRP2/PRKD1/ADAM17/HMOX1/SEMA5A/VEGFA/ANGPT1/SPARC/CD40/VEGFC/RHOJ/SCARB1/LGMN/NOS3/SRPX2/FGF1/PDPK1
GOBP_MUSCLE_CONTRACTION	GOBP_MUSCLE_CONTRACTION	200	0.507569	1.55774	9.96405e-06	0.000622212	0.000500711	3258	tags=40%, list=23%, signal=31%	CAV1/DYSF/VIM/MYLK/GJC1/KCNE3/TPM2/MYH11/F2R/FLNA/HSPB6/GJA1/DOCK4/GJA5/CALD1/EDNRA/DTNA/STAC/SULF1/ACTA2/CACNA1H/PDE4B/OXTR/TMOD1/MAP2K6/SOD1/SCN7A/ATP1B1/SLC9A1/STC1/ANK2/RPS6KB1/PTAFR/HTR2B/SSPN/ORMDL3/TMOD3/RGS2/AKAP9/SORBS3/CALCRL/KCNMA1/CLIC2/KCNJ8/CD38/ADRB2/RNF207/LMOD1/ENO1/HSBP1/COMP/PIK3CA/ADORA1/ITGA1/EDNRB/SLC8A1/GSTM2/GATA4/ACE2/BIN1/BBS2/ASB3/KCNJ2/DAPK3/SCN4B/SMTN/PLCE1/SULF2/KCND…
GOBP_RESPONSE_TO_DRUG	GOBP_RESPONSE_TO_DRUG	248	0.491427	1.51582	1.00731e-05	0.000622259	0.000500749	2699	tags=32%, list=19%, signal=26%	PDE3A/THBS1/SEMA3C/GATA6/ANXA1/MAP1B/CYP2S1/LGALS1/CYBB/SOD2/TGFB2/CYP2J2/ACER2/SFRP1/NQO1/CYP2C18/LCK/ADAM17/SFRP2/AACS/HMOX1/APOD/NNMT/PRKAA1/PDE4B/OXTR/PTPRM/VEGFC/MAP2K6/SOD1/GNPAT/BCHE/FZD1/TFRC/ANKRD1/ARL6IP5/LDHA/MTHFR/HSPA5/DVL3/RPS6KB1/GNAS/B2M/HTR2B/MGST1/FECH/COL18A1/CRKL/ENG/ABCB1/CD38/GNA12/CASP3/HMGA2/TIMP4/HDAC2/COL1A1/CREB1/CCND1/PRKAR2B/HSP90AB1/MEF2C/TOP1/ARRB1/SLC8A1/PEMT/TIMP2…
GOBP_DIGESTIVE_SYSTEM_DEVELOPMENT	GOBP_DIGESTIVE_SYSTEM_DEVELOPMENT	91	0.593481	1.7535	1.05059e-05	0.000642092	0.000516709	2980	tags=47%, list=21%, signal=37%	PDGFC/WNT5A/RARRES2/GATA6/CLDN18/TGFB2/RARB/EPHB3/SFRP1/SFRP2/LGR4/STRA6/PDGFRA/TGFB3/PCSK5/OXTR/PKDCC/AGR2/GLI1/SLC4A2/AHI1/CRKL/FGFR2/HLX/KLF5/HES1/SRP54/SHOX2/FOXF2/EDNRB/CCDC39/GATA4/SMO/IL6ST/CLMP/TP63/PTK6/CCDC40/SALL1/HIF1A/DCHS1/FOXF1/KIT
GOBP_ENDOTHELIUM_DEVELOPMENT	GOBP_ENDOTHELIUM_DEVELOPMENT	109	0.570642	1.71067	1.09538e-05	0.00066242	0.000533067	2317	tags=31%, list=17%, signal=26%	CDH5/ZEB1/PECAM1/FSTL1/HEG1/RDX/COL15A1/NRP1/APOLD1/GJA1/S1PR1/GJA5/VEZF1/VEGFA/TJP3/MSN/PDPN/STC1/NRG1/COL18A1/FGF1/ARHGEF26/S1PR3/ENG/CLIC4/CSNK2B/ITGAX/CLDN1/MARVELD2/CCM2/MET/ACVRL1/GPX1/CD34
GOBP_MESENCHYMAL_CELL_DIFFERENTIATION	GOBP_MESENCHYMAL_CELL_DIFFERENTIATION	175	0.525413	1.60598	1.12295e-05	0.000672016	0.000540789	2206	tags=31%, list=16%, signal=26%	PHLDB2/SEMA3C/GREM1/WNT5A/FN1/SNAI2/FERMT2/CDH2/FLNA/TGFB2/NRP1/NRP2/HEYL/SFRP1/EPHA3/SFRP2/EDNRA/SEMA3D/TGFB3/SEMA5A/SEMA3E/SEMA3F/SPRY1/OLFM1/SOX9/PDPN/WWTR1/WNT4/SNAI1/HTR2B/PDCD4/CLASP1/IL6/NRG1/HAS2/VASN/PHACTR4/ENG/FGFR2/FBXL17/DAB2/HMGA2/BAMBI/HDAC2/COL1A1/SEMA6D/FOXC1/HES1/ERBB4/MEF2C/FOXF2/TAPT1/EDNRB/TIAM1
GOBP_MAINTENANCE_OF_BLOOD_BRAIN_BARRIER	GOBP_MAINTENANCE_OF_BLOOD_BRAIN_BARRIER	31	0.729346	1.90721	1.25042e-05	0.000735552	0.000591919	1226	tags=42%, list=9%, signal=38%	CDH5/PECAM1/SLC12A2/OCLN/GJA1/ACTG1/LAMA2/VEGFA/ITGB1/TJP3/ANGPT1/LAMC1/IL6
GOBP_REGULATION_OF_CELLULAR_RESPONSE_TO_GROWTH_FACTOR_STIMULUS	GOBP_REGULATION_OF_CELLULAR_RESPONSE_TO_GROWTH_FACTOR_STIMULUS	201	0.511883	1.57024	1.26118e-05	0.000735552	0.000591919	2175	tags=25%, list=16%, signal=22%	CAV1/THBS1/ROBO1/CDH5/GREM1/FSTL1/WNT5A/HTRA1/ZNF423/LTBP1/FZD4/HIPK2/PEG10/FAM89B/CITED2/TMEM204/SFRP1/ADAM17/SFRP2/ASPN/TGFB3/DKK3/SULF1/SPRY1/CHST11/FST/SHISA2/MMRN2/VEGFC/WNT4/HSPA5/WASF1/FSTL3/CD109/FGF1/HTRA3/VASN/ENG/PDPK1/MIR17HG/MYO1C/DAB2/BAMBI/CREB3L1/FBN1/CAV2/HES1/HSP90AB1/GPC3/ACVRL1/ADAMTS3
GOMF_SULFUR_COMPOUND_BINDING	GOMF_SULFUR_COMPOUND_BINDING	162	0.527926	1.6097	1.26753e-05	0.000735552	0.000591919	2317	tags=32%, list=17%, signal=27%	CFH/THBS1/CXCL6/FSTL1/REG4/FN1/LTBP2/NRP1/NELL2/NRP2/PTGES/PTPRC/PANK3/ADAMTS1/OGDH/SFRP1/CCDC80/ANG/SAA1/SEMA5A/APLP1/POSTN/VEGFA/FST/ECM2/LIPH/HDGF/SERPINE2/ACBD5/PANK1/DPYSL3/MGST1/PRELP/ADAMTS5/FGF1/NDNF/SCP2/LIPG/FGFR2/COL5A1/CXCL11/FBN1/CHST15/COMP/MCCC1/COL11A1/ADAMTS3/LAMC2/FBLN7/PRMT1/GSTM2/CD34
GOBP_CHONDROCYTE_DIFFERENTIATION	GOBP_CHONDROCYTE_DIFFERENTIATION	76	0.613518	1.78394	1.38638e-05	0.000796476	0.000640946	2161	tags=37%, list=16%, signal=31%	EFEMP1/GREM1/TRPS1/CREB3L2/SNAI2/SERPINH1/RARB/SFRP2/SMPD3/ECM1/SULF1/RUNX2/CHST11/SLC39A14/TGFBI/SOX9/PKDCC/MBOAT2/PTHLH/BMPR1B/MEX3C/ADAMTS7/HMGA2/COMP/SHOX2/MEF2C/COL11A1/ACVRL1
GOBP_CARDIAC_MUSCLE_TISSUE_DEVELOPMENT	GOBP_CARDIAC_MUSCLE_TISSUE_DEVELOPMENT	139	0.543678	1.64553	1.4259e-05	0.00081107	0.00065269	2346	tags=32%, list=17%, signal=27%	BVES/GREM1/WNT5A/GATA6/GJC1/HEG1/ZFPM2/MYH11/PDGFRB/TGFB2/GJA1/RARB/S1PR1/SIK1/PDGFRA/VEGFA/SGCD/ADAMTS9/ANKRD1/SLC9A1/KAT2A/GLI1/NRG1/RGS2/RGS4/ENG/FGFR2/DKK1/MIR17HG/PAK1/ERBB3/CREB1/PDLIM5/FOXC1/NDUFV2/WT1/ERBB4/FHOD3/SHOX2/MEF2C/CDC42/COL11A1/SLC8A1/NDRG4/GATA4
GOBP_MALE_SEX_DIFFERENTIATION	GOBP_MALE_SEX_DIFFERENTIATION	96	0.578684	1.71361	1.48259e-05	0.000835047	0.000671985	1397	tags=26%, list=10%, signal=24%	WNT5A/GATA6/ZFPM2/PDGFRB/FLNA/TGFB2/NUPR1/NCOA4/CITED2/ESR1/SFRP1/RHOBTB3/SFRP2/LGR4/PDGFRA/BCL2L11/NASP/SOX9/DHX37/WNT4/AR/MGST1/FSTL3/RRM1/CRKL
GOBP_POSITIVE_REGULATION_OF_EPITHELIAL_CELL_PROLIFERATION	GOBP_POSITIVE_REGULATION_OF_EPITHELIAL_CELL_PROLIFERATION	139	0.542395	1.64164	1.51061e-05	0.000842566	0.000678036	3137	tags=40%, list=23%, signal=31%	WNT5A/SCG2/HTRA1/AKT3/NRP1/NRP2/CDH13/PRKD1/NR4A3/SFRP1/ADAM17/PKHD1/B4GALT1/ECM1/HMOX1/ANG/SEMA5A/VEGFA/TNFSF12/SOX9/VEGFC/LAMB1/ATP7A/AR/LAMC1/HTR2B/CYP7B1/HAS2/TLR4/FGF1/F3/TGFA/FGFR2/PDPK1/CCND1/CLDN1/CCL11/CAV2/CDC42/APLNR/SMO/NME1/FGF9/AREG/TP63/NOTCH2/RTN4/ZNF580/STAT5A/ESRP2/HIF1A/GATA2/CXCL12/HYAL1/PRKD2
GOBP_EMBRYONIC_MORPHOGENESIS	GOBP_EMBRYONIC_MORPHOGENESIS	389	0.457496	1.42263	1.57778e-05	0.000871572	0.000701377	3308	tags=34%, list=24%, signal=27%	PHLDB2/EFEMP1/COL4A2/GREM1/WNT5A/GATA6/FN1/ADM/TGFB2/GJA1/ALDH1A3/RARB/FLT1/HIPK2/CDON/PITX1/MAFB/DUSP1/TCTN1/NR4A3/SFRP1/USH1C/MMP2/SFRP2/MMP15/STRA6/PDGFRA/TGFB3/SULF1/CHST11/BCL2L11/ITGB1/SOX9/VEGFC/PRKACB/SOD1/LAMB1/WNT4/NAGLU/MTHFR/MIB1/KAT2A/INTU/LEO1/SNAI1/DVL3/HNF4A/AR/HDAC1/GLI1/GNAS/HTR2B/DLC1/CLASP1/PRRX1/AHI1/SHROOM3/PAF1/PHACTR4/ENG/SEC24B/FGFR2/DKK1/CASP3/MTHFD1L/PKD2/HMGA2/RNF207/M…
GOBP_CARDIAC_VENTRICLE_DEVELOPMENT	GOBP_CARDIAC_VENTRICLE_DEVELOPMENT	87	0.590388	1.73306	1.68932e-05	0.0009243	0.000743809	2949	tags=36%, list=21%, signal=28%	CPE/ROBO1/SEMA3C/WNT5A/HEG1/ZFPM2/TGFB2/HEYL/GJA5/CITED2/SFRP2/STRA6/NRG1/ENG/FGFR2/MIR17HG/PTK7/FOXC1/HES1/MEF2C/COL11A1/SOX4/GATA4/LMO4/TGFBR3/SALL1/HIF1A/SLIT2/NPRL3/FOXF1/TMEM65
GOBP_REGULATION_OF_IMMUNE_EFFECTOR_PROCESS	GOBP_REGULATION_OF_IMMUNE_EFFECTOR_PROCESS	274	0.485225	1.49839	1.74707e-05	0.000946881	0.000761981	2071	tags=24%, list=15%, signal=21%	C1R/CFH/C1S/CXCL6/IL1R1/WNT5A/ANXA1/HTRA1/C7/TGFB2/A2M/LAPTM5/LGALS3/PTPRC/TYROBP/C3/NR4A3/CD36/C4B/C1QC/FGR/HMOX1/TGFB3/SLAMF6/CD80/IL7R/FGL2/SPINK5/THOC1/CLEC7A/C1QB/C3AR1/ANGPT1/IL18R1/CD40/SASH3/RIOK3/TFRC/TNFSF4/AZGP1/PTAFR/DTX3L/PPP3CB/B2M/IL20RB/IL6/CFB/GPRC5B/C6/IL18/TLR4/SEC14L1/PDPK1/BST2/IL33/HLX/FER/RNF26/CD1D/IRAK3/LGALS9/NLRP3/MYB/NFKBIZ/RSAD2/SERPING1
GOMF_WNT_PROTEIN_BINDING	GOMF_WNT_PROTEIN_BINDING	24	0.760309	1.87795	1.8051e-05	0.000969188	0.000779932	906	tags=29%, list=7%, signal=27%	APCDD1/PORCN/FZD4/SFRP1/SFRP2/FZD8/FZD1
GOBP_ENDOTHELIAL_CELL_PROLIFERATION	GOBP_ENDOTHELIAL_CELL_PROLIFERATION	108	0.568974	1.70327	2.00477e-05	0.00106643	0.000858184	2317	tags=32%, list=17%, signal=27%	CAV1/THBS1/WNT5A/SCG2/AKT3/NRP1/GJA1/NRP2/CDH13/FLT1/PRKD1/ADAM17/COL4A3/ECM1/HMOX1/ANG/SEMA5A/SULF1/VEGFA/TNFSF12/PTPRM/SPARC/VEGFC/SCARB1/HTR2B/F3/FUT2/PDPK1/CCL11/CAV2/MEF2C/APLNR/ACVRL1/CCL2/CD34
GOBP_CELL_CELL_JUNCTION_ORGANIZATION	GOBP_CELL_CELL_JUNCTION_ORGANIZATION	157	0.532006	1.61948	2.18383e-05	0.00115102	0.000926257	2700	tags=31%, list=19%, signal=25%	CAV1/CDH5/PECAM1/GJC1/HEG1/SNAI2/FERMT2/RDX/CLDN18/CDH2/F2R/FLNA/TGFB2/OCLN/GJA1/ACTG1/CDH13/GJA5/PKHD1/TGFB3/ANG/VEGFA/TJP3/GNPAT/LIMS1/PRKCI/SNAI1/NLGN2/NUMBL/MYO1C/GRHL1/UGT8/CLDN1/PKP4/MARVELD2/PRKCH/CCM2/APC/PKP3/ACTB/CDC42/POF1B/ACE2/CDH11/CLDN2/CSF1R/PTPRO/CLDN11/AGT
GOBP_REGULATION_OF_TRANSMEMBRANE_RECEPTOR_PROTEIN_SERINE_THREONINE_KINASE_SIGNALING_PATHWAY	GOBP_REGULATION_OF_TRANSMEMBRANE_RECEPTOR_PROTEIN_SERINE_THREONINE_KINASE_SIGNALING_PATHWAY	173	0.519922	1.59156	2.28503e-05	0.00119341	0.000960368	2625	tags=28%, list=19%, signal=23%	CAV1/THBS1/CDH5/GREM1/FSTL1/WNT5A/HTRA1/ZNF423/LTBP1/TGFB2/HIPK2/PEG10/FAM89B/CITED2/SFRP1/ADAM17/SFRP2/ASPN/TGFB3/DKK3/SULF1/SPRY1/CHST11/FST/HSPA5/FSTL3/CD109/HTRA3/VASN/ENG/PDPK1/DKK1/MIR17HG/DAB2/CSNK2B/BAMBI/FBN1/CAV2/HES1/HSP90AB1/GPC3/ACVRL1/ACVR1B/UBC/GATA4/PMEPA1/HSPA1A/FKBP8/NOTCH2
GOBP_CELLULAR_RESPONSE_TO_CHEMICAL_STRESS	GOBP_CELLULAR_RESPONSE_TO_CHEMICAL_STRESS	285	0.474026	1.46414	2.47137e-05	0.00127731	0.00102789	2735	tags=28%, list=20%, signal=23%	CAV1/MYLK/ANXA1/ERRFI1/GPX3/CYBB/SOD2/ETS1/FBLN5/TRPC6/H19/PRKD1/NR4A3/CD36/NQO1/PYCR2/MMP2/SMPD3/FOXO1/PDGFRA/HMOX1/FUT8/AXL/NR4A2/STX2/PRKAA1/TLR6/EFHD1/FAS/ERMP1/SOD1/MAPKAP1/NOX4/PLA2R1/SLC25A24/ARL6IP5/LRRC8E/ATP7A/SERPINB6/NOS3/MGST1/PDGFD/IL6/NCF2/HSPA1B/GPX2/MELK/TLR4/CAMKK2/KLF2/CASP3/PKD2/KEAP1/MMP9/GPX7/PAWR/HDAC2/FER/MPV17/ZFP36L1/MYB/MET/FANCD2/PIK3CA/XRCC6/PTPRK/UBQLN1/VRK2/MAP1LC3A…
GOBP_GLAND_MORPHOGENESIS	GOBP_GLAND_MORPHOGENESIS	90	0.583221	1.72172	2.49015e-05	0.00127731	0.00102789	1646	tags=27%, list=12%, signal=24%	CAV1/SEMA3C/WNT5A/IGFBP5/TGFB2/PGR/TGM2/ESR1/SFRP1/TNC/TGFB3/SULF1/MSN/SOX9/PLXND1/WNT4/AR/GLI1/CEBPB/CYP7B1/IL6/FGF1/FGFR2/FEM1B
GOBP_NEGATIVE_REGULATION_OF_TRANSMEMBRANE_RECEPTOR_PROTEIN_SERINE_THREONINE_KINASE_SIGNALING_PATHWAY	GOBP_NEGATIVE_REGULATION_OF_TRANSMEMBRANE_RECEPTOR_PROTEIN_SERINE_THREONINE_KINASE_SIGNALING_PATHWAY	95	0.580498	1.72137	2.62598e-05	0.00133506	0.00107436	1862	tags=28%, list=13%, signal=25%	CAV1/GREM1/WNT5A/HTRA1/LTBP1/HIPK2/PEG10/FAM89B/SFRP1/ADAM17/SFRP2/ASPN/TGFB3/SPRY1/CHST11/FST/HSPA5/FSTL3/CD109/HTRA3/VASN/PDPK1/DKK1/MIR17HG/BAMBI/FBN1/CAV2
GOBP_SYNAPSE_ORGANIZATION	GOBP_SYNAPSE_ORGANIZATION	285	0.473267	1.46179	2.72269e-05	0.00137209	0.00110416	2222	tags=26%, list=16%, signal=22%	FLRT2/TUBA1A/WNT5A/SRGN/MAP1B/PTPRD/CDH2/F2R/SPARCL1/COL4A5/FLNA/COL4A1/NRP2/ACTG1/GLRB/APBB2/TPBG/EPHB3/PPFIBP1/C3/PCDHB6/C1QC/TNC/LRRC4C/SEMA3E/LAMB2/SEMA3F/ELFN1/AMIGO2/C1QB/OXTR/SPARC/GNPAT/FZD1/PLXND1/SPOCK2/DBN1/NLGN2/WASF1/ARF6/UBE2V2/LGMN/KALRN/PCDHB5/ABI2/SRPX2/CRKL/IGF1R/CDK5R1/RELN/CX3CR1/DKK1/CHCHD10/PCDHB16/SLITRK4/NFASC/LRFN5/PDLIM5/MTMR2/EIF4G1/PCDHB4/HSPA8/ERBB4/PCDHB3/CAPRIN2/AFG…
GOBP_NEGATIVE_REGULATION_OF_RESPONSE_TO_EXTERNAL_STIMULUS	GOBP_NEGATIVE_REGULATION_OF_RESPONSE_TO_EXTERNAL_STIMULUS	248	0.482737	1.48901	2.89052e-05	0.001444	0.00116203	2690	tags=28%, list=19%, signal=23%	PHLDB2/THBS1/ROBO1/SEMA3C/CDH5/GREM1/WNT5A/TSPAN8/SERPINE1/TNFAIP6/FAP/SPP1/HTRA1/NRP1/SLC12A2/PLAU/A2M/GJA1/PTPRC/SERPINF1/DUSP1/SEMA3D/PDGFRA/SAA1/SEMA5A/FGL2/SEMA3E/SEMA3F/SPINK5/PLAT/MVK/CNOT7/FNDC4/SOD1/RIOK3/WNT4/SERPINE2/NLRC3/NT5E/NOS3/IL20RB/CLASP1/CD109/SYT11/CALCRL/SEC14L1/SEMA6D/BACE1/LRFN5/RNF26/IRAK3/LGALS9/NLRP3/RORA/SERPING1/ADORA1/CCL2/GPX1/METRNL/SEMA3A/CD34/SERPINB9/BBS2/SOCS5/…
GOBP_LUNG_ALVEOLUS_DEVELOPMENT	GOBP_LUNG_ALVEOLUS_DEVELOPMENT	34	0.70689	1.85276	2.91584e-05	0.0014441	0.0011621	1792	tags=38%, list=13%, signal=33%	GATA6/ERRFI1/IGFBP5/PGR/SMPD3/STRA6/TGFB3/ABCA12/PKDCC/ATP7A/LIF/FGFR2/CREB1
GOBP_POSITIVE_REGULATION_OF_WOUND_HEALING	GOBP_POSITIVE_REGULATION_OF_WOUND_HEALING	39	0.69216	1.84992	3.04327e-05	0.00149432	0.00120252	710	tags=28%, list=5%, signal=27%	THBS1/MYLK/ANXA1/SERPINE1/FERMT2/F2R/OCLN/ACTG1/CD36/CLEC7A/ITGB1
GOBP_BLOOD_VESSEL_ENDOTHELIAL_CELL_MIGRATION	GOBP_BLOOD_VESSEL_ENDOTHELIAL_CELL_MIGRATION	95	0.577683	1.71302	3.31673e-05	0.0016148	0.00129947	1353	tags=25%, list=10%, signal=23%	THBS1/ROBO1/CDH5/GREM1/ANXA1/PTGS2/AKT3/NRP1/ETS1/PRCP/PRKD1/CLEC14A/ADAM17/HMOX1/VEGFA/ANGPT1/CD40/MMRN2/VEGFC/RHOJ/MYH9/SCARB1/NOS3/SRPX2
GOBP_REGULATION_OF_ANATOMICAL_STRUCTURE_SIZE	GOBP_REGULATION_OF_ANATOMICAL_STRUCTURE_SIZE	349	0.458144	1.42271	3.39564e-05	0.00163932	0.00131921	3046	tags=32%, list=22%, signal=26%	CAV1/SEMA3C/WNT5A/FN1/MAP1B/SPP1/ADM/RDX/F2R/AKT3/ADD3/SOD2/NRP1/IQGAP2/SLC12A2/GJA1/CFL2/CDC42EP5/PFN2/PFN1/DOCK4/GJA5/USH1C/EDNRA/ARPC5/SEMA3D/SEMA5A/IL7R/SEMA3E/SEMA3F/VEGFA/ACTA2/HCK/OLFM1/MSN/OXTR/TMOD1/SOD1/RASA1/ELN/DBN1/ATP7A/PREX1/WASF1/ARF6/PTAFR/NOS3/HTR2B/LIMA1/ABI2/TMOD3/RGS2/GCLC/CDK5R1/GDI1/E2F4/KCNMA1/KANK4/KLF2/LIMK1/CD38/VILL/PAK1/KCNMB2/MYO1C/ADRB2/SSH3/LMOD1/ARFIP2/FER/SEMA6D/…
GOCC_CELL_SUBSTRATE_JUNCTION	GOCC_CELL_SUBSTRATE_JUNCTION	391	0.450416	1.4006	3.56402e-05	0.00169532	0.00136427	2449	tags=25%, list=18%, signal=21%	FLRT2/CAV1/VIM/PHLDB2/CNN3/DDR2/ANXA1/FAP/MCAM/FERMT2/RDX/CDH2/PDGFRB/FLNA/NRP1/PLAU/AKAP12/GJA1/IL16/ACTG1/CDH13/FLT1/PALLD/MRC2/PFN1/PPFIBP1/PTPRC/TGM2/MARCKS/ADAM17/ARPC5/TNC/MME/MPRIP/LAP3/HCK/ITGB1/MSN/LIMS1/FZD1/NOX4/ITGBL1/SLC9A1/HSPA5/CSRP2/LCP1/WASF1/MYH9/ARF6/RPL7/ALCAM/SNAP23/B2M/DLC1/CLASP1/LIMA1/RPL9/HSPA1B/AHNAK/SLC4A2/YWHAE/DST/CLTC/SORBS3/PARVB/AFAP1/ENG/PDPK1/PIP5K1A/PAK1/GNA12/D…
GOBP_OVULATION_CYCLE	GOBP_OVULATION_CYCLE	45	0.667531	1.82664	3.57066e-05	0.00169532	0.00136427	1691	tags=42%, list=12%, signal=37%	TGFB2/ETS1/PTX3/PGR/FZD4/SERPINF1/ADAMTS1/ESR1/PDGFRA/TGFB3/AXL/OXTR/MAP2K6/HSPA5/BMPR1B/HAS2/EREG/CASP3/TIMP4
GOBP_RESPONSE_TO_MOLECULE_OF_BACTERIAL_ORIGIN	GOBP_RESPONSE_TO_MOLECULE_OF_BACTERIAL_ORIGIN	241	0.485925	1.49741	3.68732e-05	0.00173636	0.0013973	2255	tags=28%, list=16%, signal=24%	VIM/CXCL6/WNT5A/TAB2/SERPINE1/SSC5D/ADM/CMPK2/F2R/SOD2/AKAP12/GJA1/PTGES/CD36/C4B/TLR1/ADAM17/S100A8/CD14/CD80/AXL/CD180/PDE4B/HCK/TLR6/TNIP3/SPARC/CD40/ANKRD1/TNFSF4/SCARB1/RPS6KB1/PTAFR/GNG12/MAPKAPK2/B2M/NOS3/CEBPB/PDCD4/MGST1/CXCL1/IL6/PDCD1LG2/IL18/TLR4/PAF1/CX3CR1/FGFR2/KCNJ8/CASP3/NFKBIA/TIMP4/PTGFR/PELI1/HDAC2/FER/RPS6KA3/CXCL11/IRAK3/CLDN1/LGALS9/NLRP3/MEF2C/IRAK1/EDNRB/RIPK2/IL10RA/CCL2
GOCC_MEMBRANE_MICRODOMAIN	GOCC_MEMBRANE_MICRODOMAIN	246	0.484354	1.49331	3.79231e-05	0.00177128	0.0014254	2770	tags=31%, list=20%, signal=25%	CAV1/BVES/TUBA1A/PECAM1/KCNE3/GNAI1/CDH2/F2R/KCND2/GJA1/SERPINH1/CDH13/S1PR1/PTPRC/CD36/PLVAP/TLR1/LCK/ADAM17/CD14/HMOX1/GNAI2/MME/LDHB/TRPC4/SULF1/ABCA1/HCK/ITGB1/TLR6/ANGPT1/PLLP/PDPN/FAS/ATP1B1/EFHD2/SLC9A1/ATP7A/SCARB1/PLSCR1/PODXL/NOS3/DLC1/CNTN1/AHNAK/HAS2/VDAC1/STOM/PSEN2/LCP2/KCNMA1/BST2/MYO1C/CASP3/TNFRSF10A/CD2/BACE1/CAV2/PRKAR2B/UNC5B/CTSD/FAIM2/ITGA1/TUBB/EDNRB/ERLIN2/ACE2/SMO/RAB5A/P…
GOBP_POSITIVE_REGULATION_OF_CELL_JUNCTION_ASSEMBLY	GOBP_POSITIVE_REGULATION_OF_CELL_JUNCTION_ASSEMBLY	67	0.610605	1.75292	3.98308e-05	0.00184538	0.00148503	1353	tags=24%, list=10%, signal=22%	FLRT2/CAV1/PTPRD/FERMT2/NRP1/TPBG/EPHB3/SFRP1/VEGFA/AMIGO2/OXTR/LIMS1/WNT4/NLGN2/UBE2V2/SRPX2
GOBP_POSITIVE_REGULATION_OF_CYTOKINE_PRODUCTION	GOBP_POSITIVE_REGULATION_OF_CYTOKINE_PRODUCTION	318	0.459166	1.42189	4.18139e-05	0.00190611	0.0015339	2381	tags=25%, list=17%, signal=21%	THBS1/IL1R1/WNT5A/GATA6/ANXA1/SERPINE1/PTGS2/HEG1/F2R/LAPTM5/IL16/H19/PTPRC/TYROBP/C3/NR4A3/CD36/GAPDH/TLR1/ADAM17/FGR/CD14/HMOX1/SLAMF6/CD80/SAA1/POSTN/SULF1/PDE4B/CLEC7A/TLR7/TLR6/C3AR1/IL18R1/CD40/TLR8/SOD1/SASH3/RIOK3/TNFSF4/POLR3GL/POLR3D/PTAFR/MAPKAPK2/B2M/HTR2B/CEBPB/IL20RB/IL6/GPRC5B/HSPA1B/IFIH1/IL18/TLR4/MNDA/PRKCQ/F3/EREG/IL33/IFNGR1/PELI1/HDAC2/CD2/CREB1/LGALS9/NLRP3/MYB/RSAD2/RORA/XR…
GOBP_REGULATION_OF_CELL_MATRIX_ADHESION	GOBP_REGULATION_OF_CELL_MATRIX_ADHESION	106	0.558427	1.66663	4.20937e-05	0.00190611	0.0015339	1278	tags=24%, list=9%, signal=22%	PHLDB2/THBS1/GREM1/SERPINE1/FERMT2/NRP1/PLAU/ACTG1/CDH13/ACER2/CD36/SFRP1/EPHA3/PKHD1/APOD/POSTN/SEMA3E/VEGFA/RASA1/LIMS1/SLC9A1/WNT4/DLC1/CLASP1/BST1
GOBP_POSITIVE_REGULATION_OF_RESPONSE_TO_WOUNDING	GOBP_POSITIVE_REGULATION_OF_RESPONSE_TO_WOUNDING	49	0.660948	1.83116	4.21367e-05	0.00190611	0.0015339	1010	tags=27%, list=7%, signal=25%	THBS1/MYLK/ANXA1/SERPINE1/FERMT2/F2R/FLNA/OCLN/ACTG1/CD36/CLEC7A/ITGB1/ATP7A
GOBP_CELLULAR_RESPONSE_TO_OXYGEN_RADICAL	GOBP_CELLULAR_RESPONSE_TO_OXYGEN_RADICAL	18	0.813544	1.91322	4.3802e-05	0.00195928	0.00157669	1173	tags=44%, list=8%, signal=41%	SOD2/FBLN5/H19/CD36/NQO1/SOD1/ATP7A/NOS3
GOBP_REGULATION_OF_VASCULAR_PERMEABILITY	GOBP_REGULATION_OF_VASCULAR_PERMEABILITY	31	0.707758	1.85076	4.39943e-05	0.00195928	0.00157669	755	tags=29%, list=5%, signal=28%	PDE3A/CDH5/ADM/FERMT2/OCLN/AKAP12/VEGFA/TJP3/ANGPT1
GOBP_HOMEOSTASIS_OF_NUMBER_OF_CELLS	GOBP_HOMEOSTASIS_OF_NUMBER_OF_CELLS	206	0.496248	1.52516	4.63503e-05	0.00204833	0.00164834	3044	tags=33%, list=22%, signal=27%	CXCL6/FSTL1/ANXA1/CDH2/F2R/AKT3/ETS1/PMAIP1/HIPK2/SPI1/GLIS2/MAFB/ADAM17/LGR4/HMOX1/LIPA/TSC22D3/IL7R/AXL/VEGFA/MYCT1/BCL2L11/PDE4B/SOX9/FAS/SOD1/SASH3/CCNB2/TMEM14C/PPP3CB/B2M/NOS3/MERTK/IL20RB/IL6/HSPA1B/NCAPG2/SMAP1/TMOD3/ZNF16/MAEA/KLF2/MPL/MIR17HG/CASP3/UFL1/ZFP36L1/LGALS9/MEF2C/BCL6/SOX4/ACVR1B/PRMT1/THRA/ARMCX1/SMO/GAPT/HSPA1A/ADAR/NLE1/TGFBR3/FLVCR1/ILDR2/HIF1A/ACVR2A/KIT/GATA2/BPGM/SLC15…
GOBP_REGULATION_OF_EXTRACELLULAR_MATRIX_ORGANIZATION	GOBP_REGULATION_OF_EXTRACELLULAR_MATRIX_ORGANIZATION	34	0.698372	1.83043	4.68186e-05	0.00205323	0.00165229	1435	tags=32%, list=10%, signal=29%	PHLDB2/DDR2/FAP/ETS1/AEBP1/SOX9/PDPN/CLASP1/IL6/HAS2/ANTXR1
GOBP_LEUKOCYTE_CHEMOTAXIS	GOBP_LEUKOCYTE_CHEMOTAXIS	152	0.523768	1.59521	4.71953e-05	0.00205407	0.00165296	2255	tags=29%, list=16%, signal=25%	THBS1/CXCL6/GREM1/WNT5A/RARRES2/ANXA1/SCG2/SERPINE1/TGFB2/SLC12A2/IL16/FLT1/S1PR1/LGALS3/DUSP1/MCU/ADAM17/S100A8/SAA1/VEGFA/PDE4B/C3AR1/CXCL16/VEGFC/PREX1/LGMN/CYP7B1/CXCL1/IL6/BST1/CCL18/CAMK1D/CCL22/CXCL11/CCL11/LGALS9/SRP54/CSF3R/ITGA1/FCER1G/EDNRB/CCR1/ADAM8/CCL2
GOBP_CHONDROCYTE_DEVELOPMENT	GOBP_CHONDROCYTE_DEVELOPMENT	24	0.741571	1.83166	4.80279e-05	0.00207459	0.00166948	2118	tags=54%, list=15%, signal=46%	SERPINH1/SFRP2/SMPD3/ECM1/SULF1/CHST11/SOX9/PTHLH/BMPR1B/MEX3C/COMP/SHOX2/COL11A1
GOBP_NEURAL_CREST_CELL_DIFFERENTIATION	GOBP_NEURAL_CREST_CELL_DIFFERENTIATION	67	0.607806	1.74489	5.00129e-05	0.00214421	0.0017255	2359	tags=39%, list=17%, signal=32%	SEMA3C/FN1/SNAI2/CDH2/NRP1/NRP2/SFRP1/EDNRA/SEMA3D/SEMA5A/SEMA3E/SEMA3F/SOX9/HTR2B/NRG1/PHACTR4/FBXL17/SEMA6D/FOXC1/HES1/ERBB4/MEF2C/TAPT1/EDNRB/SEMA3A/SMO
GOBP_NEGATIVE_REGULATION_OF_CHONDROCYTE_DIFFERENTIATION	GOBP_NEGATIVE_REGULATION_OF_CHONDROCYTE_DIFFERENTIATION	15	0.813453	1.85004	5.38785e-05	0.00229283	0.0018451	1314	tags=47%, list=9%, signal=42%	EFEMP1/GREM1/SNAI2/RARB/SOX9/PTHLH/ADAMTS7
GOBP_CARDIAC_SEPTUM_MORPHOGENESIS	GOBP_CARDIAC_SEPTUM_MORPHOGENESIS	51	0.647535	1.79884	5.50013e-05	0.00231876	0.00186597	2873	tags=43%, list=21%, signal=34%	ROBO1/SEMA3C/WNT5A/GATA6/ZFPM2/TGFB2/NRP1/NRP2/RARB/HEYL/CITED2/DHRS3/ENG/FGFR2/MIR17HG/HES1/SOX4/GATA4/SMO/NOTCH2/TGFBR3/SLIT2
GOBP_REGULATION_OF_TUBE_SIZE	GOBP_REGULATION_OF_TUBE_SIZE	74	0.604615	1.75854	5.5295e-05	0.00231876	0.00186597	2700	tags=51%, list=19%, signal=42%	CAV1/ADM/F2R/SOD2/GJA1/DOCK4/GJA5/EDNRA/ACTA2/OXTR/SOD1/PTAFR/NOS3/HTR2B/RGS2/GCLC/KCNMA1/KLF2/CD38/KCNMB2/ADRB2/FOXC1/P2RY1/COMP/ADORA1/ITGA1/EXT2/EDNRB/SLC8A1/GPX1/AVPR1A/SCPEP1/ACE2/BBS2/GCLM/KCNMB4/ATG5/AGT
GOBP_REGULATION_OF_ENDOTHELIAL_CELL_MIGRATION	GOBP_REGULATION_OF_ENDOTHELIAL_CELL_MIGRATION	136	0.533673	1.61504	5.75427e-05	0.00239553	0.00192774	1403	tags=22%, list=10%, signal=20%	THBS1/WNT5A/ANXA1/PTGS2/AKT3/NRP1/ETS1/NRP2/PRCP/PRKD1/SERPINF1/ADAM17/HMOX1/SEMA5A/VEGFA/PTPRM/ANGPT1/GLUL/SPARC/CD40/MMRN2/VEGFC/ADAMTS9/RHOJ/STC1/SCARB1/LGMN/NOS3/SRPX2/FGF1
GOBP_POSITIVE_REGULATION_OF_CELL_DEATH	GOBP_POSITIVE_REGULATION_OF_CELL_DEATH	492	0.431715	1.35129	5.80958e-05	0.00240116	0.00193228	2255	tags=23%, list=16%, signal=20%	CAV1/THBS1/WNT5A/ANXA1/CSRNP3/IGFBP3/FAP/ADM/CD248/PDGFRB/SOD2/TGFB2/NUPR1/AKAP12/LAPTM5/ALDH1A3/CALHM2/PMAIP1/ACER2/RARB/H19/PTPRC/DUSP1/TYROBP/TGM2/CD36/SFRP1/NQO1/SIK1/LCK/LPAR1/SFRP2/S100A8/B4GALT1/FOXO1/HMOX1/TGFB3/ARHGEF5/RPS6KA2/TIMP3/GADD45B/MLLT11/PEA15/BCL2L11/TNFSF12/OLFM1/CLEC7A/ITGB1/TLR6/CD40/FAS/MAP2K6/SOD1/NOX4/PLA2R1/ANKRD1/ARL6IP5/ARHGEF17/LDHA/SLC9A1/BRMS1/PRKCI/PREX1/BMPR1B/WW…
GOBP_FEMALE_SEX_DIFFERENTIATION	GOBP_FEMALE_SEX_DIFFERENTIATION	79	0.589091	1.71137	5.95601e-05	0.00244409	0.00196683	2228	tags=38%, list=16%, signal=32%	WNT5A/ZFPM2/PTX3/PGR/NUPR1/FZD4/ADAMTS1/ESR1/SFRP1/STRA6/PDGFRA/ANG/AXL/VEGFA/FST/SOD1/IDH1/WNT4/HSPA5/BMPR1B/CEBPB/MERTK/EREG/ARID5B/CASP3/FOXC1/NUP107/WT1/ARRB1/ACVR1B
GOBP_NEGATIVE_REGULATION_OF_PROTEIN_IMPORT	GOBP_NEGATIVE_REGULATION_OF_PROTEIN_IMPORT	10	0.889241	1.85234	6.09821e-05	0.0024847	0.0019995	840	tags=70%, list=6%, signal=66%	MDFIC/PKIG/RAB23/CD36/APOD/ANGPT1/PKIA
GOBP_NEURON_PROJECTION_GUIDANCE	GOBP_NEURON_PROJECTION_GUIDANCE	195	0.502244	1.5406	6.17886e-05	0.00249983	0.00201168	3287	tags=35%, list=24%, signal=27%	FLRT2/ROBO1/SEMA3C/WNT5A/CHL1/NRP1/NRP2/VLDLR/LAMA2/PLXNC1/PALLD/EPHB3/EPHA3/CRMP1/TUBB3/SEMA3D/NOTCH3/SEMA5A/SEMA3E/LAMB2/SEMA3F/VEGFA/PTPRM/SHC3/KIF5C/PLXND1/EGR2/BMPR1B/ALCAM/KALRN/CHN1/CNTN4/PRKCQ/CDK5R1/RELN/SHC1/GAB1/SEMA6D/NFASC/ENAH/UNC5B/EFNB3/PIK3CA/LAMC2/VSTM2L/SEMA3A/SMO/PDLIM7/CSF1R/BDNF/KIF5B/NOTCH2/PTPRO/FZD3/DOK1/LAMA3/SLIT2/SPTBN1/CXCL12/SEMA4D/RANBP9/NTN1/IGSF9/PLXNA2/SHANK3/PLX…
GOBP_GLOMERULUS_DEVELOPMENT	GOBP_GLOMERULUS_DEVELOPMENT	48	0.652298	1.79976	6.58701e-05	0.00264632	0.00212957	2922	tags=60%, list=21%, signal=48%	PECAM1/BASP1/PDGFRB/HEYL/LGR4/COL4A3/PDGFRA/LAMB2/SULF1/ACTA2/NID1/ANGPT1/WWTR1/ENPEP/PODXL/PDGFD/COL4A4/FOXC1/MPV17/HES1/WT1/MEF2C/CD34/KLF15/NOTCH2/PTPRO/PLCE1/SULF2/MYO1E
GOCC_COLLAGEN_TRIMER	GOCC_COLLAGEN_TRIMER	51	0.643041	1.78635	6.68277e-05	0.00265935	0.00214005	2573	tags=47%, list=19%, signal=38%	COL4A2/COL15A1/COL6A3/COL6A2/COL4A5/COL4A1/COL14A1/MSR1/C1QC/COL4A3/C1QB/COL18A1/COL24A1/C1QTNF6/COL1A2/COL4A4/COL1A1/COL5A1/COL6A1/COL11A1/COL7A1/COL21A1/COL3A1/COL12A1
GOCC_CELL_CELL_JUNCTION	GOCC_CELL_CELL_JUNCTION	361	0.448607	1.39241	6.71202e-05	0.00265935	0.00214005	2244	tags=22%, list=16%, signal=19%	FLRT2/BVES/CNN3/CDH5/PECAM1/ANXA1/GJC1/HEG1/FERMT2/RDX/CLDN18/CDH2/ADD3/FLNA/FZD4/PDLIM3/OCLN/MPDZ/GJA1/MXRA8/ACTG1/TRPC6/PLXDC1/GJA5/TMEM204/ADAM17/B4GALT1/DSC3/LIN7A/TRPC4/VEGFA/TJP3/OXTR/PTPRM/LIMS1/ATP1B1/SLC9A1/DBN1/PRKCI/ANK2/MYH9/PCDH9/SNAP23/PODXL/HMCN1/SPECC1L/AHNAK/ABI2/TMOD3/AHI1/SHROOM3/LCP2/PAK1/PKD2/CLIC4/GAB1/SLC5A1/PTK7/NFASC/CD2/PDLIM5/CCND1/CLDN1/PKP4/AQP3/VSIG10/MARVELD2/APC/PI…
GOBP_TYPE_B_PANCREATIC_CELL_PROLIFERATION	GOBP_TYPE_B_PANCREATIC_CELL_PROLIFERATION	15	0.80827	1.83825	6.79982e-05	0.00267568	0.00215319	402	tags=40%, list=3%, signal=39%	ERRFI1/IGFBP3/IGFBP5/NUPR1/NR4A3/SFRP1
GOBP_NEGATIVE_REGULATION_OF_RESPONSE_TO_WOUNDING	GOBP_NEGATIVE_REGULATION_OF_RESPONSE_TO_WOUNDING	56	0.625549	1.76647	7.02694e-05	0.00274624	0.00220998	1307	tags=29%, list=9%, signal=26%	PHLDB2/THBS1/TSPAN8/SERPINE1/FAP/SPP1/SLC12A2/PLAU/GJA1/PDGFRA/PLAT/WNT4/SERPINE2/NOS3/CLASP1/CD109
GOBP_NEGATIVE_REGULATION_OF_TRANSPORT	GOBP_NEGATIVE_REGULATION_OF_TRANSPORT	284	0.468099	1.44623	7.16323e-05	0.00278059	0.00223762	3390	tags=34%, list=24%, signal=26%	CAV1/DYSF/THBS1/ANXA1/KCNE3/MAP1B/F2R/ABCA7/GJA1/MDFIC/PKIG/RAB23/LGALS3/PRKD1/CD36/SFRP1/EPHA3/BAG3/HMOX1/RAB7A/APOD/GNAI2/PEA15/WWP2/TFF2/OXTR/ANGPT1/RAB11FIP3/PKDCC/PKIA/GEM/PLA2R1/ARL6IP5/LMAN1/ATP7A/STC1/PID1/SERPINE2/ARF6/PLSCR1/LIF/NRG1/KALRN/YWHAE/RGS2/VDAC1/SYT11/GDI1/RGS4/CLIC2/FMR1/BST2/ERBB3/PKD2/MMP9/ATXN2/ANKRD13B/MTMR2/LGALS9/P2RY1/RSAD2/UBQLN2/ADORA1/UBQLN1/ANKRD13D/GSTM2/YWHAQ/YR…
GOBP_REGULATION_OF_MORPHOGENESIS_OF_AN_EPITHELIUM	GOBP_REGULATION_OF_MORPHOGENESIS_OF_AN_EPITHELIUM	44	0.65492	1.79026	7.38905e-05	0.002849	0.00229267	1791	tags=36%, list=13%, signal=32%	GREM1/WNT5A/NKD1/GJA1/ESR1/SFRP1/LGR4/SULF1/VEGFA/SOX9/WNT4/AR/LIF/FGF1/RNF207/ITGAX
GOBP_REGULATION_OF_PEPTIDASE_ACTIVITY	GOBP_REGULATION_OF_PEPTIDASE_ACTIVITY	300	0.466981	1.44363	7.61445e-05	0.00291634	0.00234685	2771	tags=27%, list=20%, signal=22%	CAV1/SPOCK1/THBS1/ROBO1/PI15/FN1/SERPINE1/ITIH5/COL6A3/F2R/A2M/LAPTM5/SERPINH1/PMAIP1/ACER2/SERPINF1/C3/GAPDH/C4B/TFPI2/LCK/SFRP2/S100A8/COL4A3/ECM1/TIMP3/VEGFA/BCL2L11/RCN3/SPINK5/CLEC7A/FAS/UACA/ARL6IP5/IGBP1/SPOCK2/SERPINB6/SERPINE2/CASP10/NAIP/HDAC1/LGMN/FNIP1/DLC1/CD109/YWHAE/ANTXR1/F3/BCL2L13/BST2/TIMP4/MMP9/TNFRSF10A/APH1B/RPS6KA3/IFI6/LGALS9/NLRP3/CTSD/SERPING1/GPC3/COL7A1/RIPK2/ARRB1/GPX…
GOBP_PROTEIN_LOCALIZATION_TO_CELL_CELL_JUNCTION	GOBP_PROTEIN_LOCALIZATION_TO_CELL_CELL_JUNCTION	21	0.7618	1.84286	7.90298e-05	0.00298089	0.00239881	713	tags=29%, list=5%, signal=27%	CDH5/PECAM1/FLNA/ACTG1/ZDHHC7/TJP3
GOBP_MUSCLE_CELL_PROLIFERATION	GOBP_MUSCLE_CELL_PROLIFERATION	141	0.533998	1.61744	7.92717e-05	0.00298089	0.00239881	2723	tags=36%, list=20%, signal=29%	THBS1/GATA6/IGFBP3/ZFPM2/PDGFRB/IGFBP5/SOD2/TGFB2/GJA1/CDH13/S1PR1/ADAMTS1/TGM2/NR4A3/MMP2/SMPD3/HMOX1/APOD/TGFB3/GNAI2/ANG/ANGPT1/SIX5/ELN/RPS6KB1/PTAFR/GLI1/PDCD4/PDGFD/IL6/IL18/CALCRL/EREG/FGFR2/MIR17HG/PAK1/MMP9/FOXC1/MYB/ERBB4/MEF2C/XRCC6/IRAK1/MFN2/NDRG4/MAP3K5/FGF9/PRKAR1A/P2RY6/HBEGF/TGFBR3
GOBP_NEGATIVE_REGULATION_OF_WOUND_HEALING	GOBP_NEGATIVE_REGULATION_OF_WOUND_HEALING	45	0.656308	1.79592	7.93867e-05	0.00298089	0.00239881	1307	tags=33%, list=9%, signal=30%	PHLDB2/THBS1/TSPAN8/SERPINE1/FAP/SLC12A2/PLAU/GJA1/PDGFRA/PLAT/WNT4/SERPINE2/NOS3/CLASP1/CD109
GOBP_POSITIVE_REGULATION_OF_MAP_KINASE_ACTIVITY	GOBP_POSITIVE_REGULATION_OF_MAP_KINASE_ACTIVITY	176	0.504618	1.54337	8.08992e-05	0.00301796	0.00242863	2252	tags=27%, list=16%, signal=23%	THBS1/ROBO1/PDGFC/WNT5A/TAB2/PDGFRB/FZD4/MDFIC/FLT1/PTPRC/LPAR1/TGFB3/ARHGEF5/GADD45B/SAA1/PEA15/VEGFA/FPR1/PRKAA1/MLKL/TLR6/CD40/MAP2K6/SOD1/MAPK10/DVL3/MAPKAPK2/HTR2B/PDGFD/NRG1/DUSP19/TLR4/CRKL/FGF1/TGFA/DKK1/PAK1/MAP4K5/SHC1/UBE2N/MAP3K11/ITGA1/IRAK1/RIPK2/TIAM1/ARRB1/ADAM8/UBC
GOBP_OVULATION_CYCLE_PROCESS	GOBP_OVULATION_CYCLE_PROCESS	30	0.713769	1.85582	8.34738e-05	0.00309392	0.00248976	1659	tags=43%, list=12%, signal=38%	TGFB2/PTX3/PGR/FZD4/ADAMTS1/ESR1/PDGFRA/TGFB3/MAP2K6/HSPA5/BMPR1B/EREG/CASP3
GOCC_CELL_BODY	GOCC_CELL_BODY	353	0.448532	1.39225	8.6297e-05	0.00317805	0.00255746	3356	tags=35%, list=24%, signal=27%	CNN3/PTPN13/KCNE3/MAP1B/SLC2A3/CYBB/FLNA/TGFB2/NRP1/SLC12A2/KCND2/AKAP12/NDN/PLXDC1/MAP1A/SERPINF1/STMN2/NQO1/LPAR1/SLC1A3/CRMP1/FXR1/APOD/TGFB3/ELOVL5/ATXN10/GNAI2/ANG/MME/CPNE5/ACTA2/PMM1/PRKAA1/OLFM1/STRN3/TCP1/GABARAPL1/PTBP2/CD40/LZTS1/PDE1C/SOD1/KIF5C/ATP7A/SNCAIP/GABARAP/BMPR1B/TMEM50A/HDAC1/ALCAM/DPYSL3/MAPK8IP1/RRM1/SLC1A4/CDK5R1/SYT11/GDI1/HSP90AA4P/ELK1/PPP1R1B/PSEN2/CX3CR1/CRTC1/MPL/F…
GOBP_TRANSMEMBRANE_RECEPTOR_PROTEIN_SERINE_THREONINE_KINASE_SIGNALING_PATHWAY	GOBP_TRANSMEMBRANE_RECEPTOR_PROTEIN_SERINE_THREONINE_KINASE_SIGNALING_PATHWAY	256	0.468614	1.44615	8.85531e-05	0.00319556	0.00257155	2252	tags=23%, list=16%, signal=20%	CAV1/VIM/THBS1/CDH5/GREM1/FSTL1/WNT5A/LTBP2/HTRA1/FERMT2/ZNF423/LTBP1/TGFB2/HIPK2/PEG10/FAM89B/CITED2/SFRP1/ADAM17/SFRP2/ASPN/SMPD3/TGFB3/DKK3/FUT8/SULF1/RUNX2/SPRY1/CHST11/FST/WWTR1/HSPA5/BMPR1B/HNF4A/LRRC32/PDCD4/FSTL3/CD109/HTRA3/VASN/ENG/PDPK1/DKK1/MIR17HG/COL1A2/DAB2/CSNK2B/BAMBI/CREB1/FBN1/CAV2/HES1/HSP90AB1/COMP/GPC3/PTPRK/ACVRL1/ACVR1B/UBC
GOBP_NEGATIVE_REGULATION_OF_ENDOTHELIAL_CELL_PROLIFERATION	GOBP_NEGATIVE_REGULATION_OF_ENDOTHELIAL_CELL_PROLIFERATION	27	0.731306	1.85579	8.86838e-05	0.00319556	0.00257155	780	tags=33%, list=6%, signal=32%	CAV1/THBS1/SCG2/GJA1/FLT1/COL4A3/SULF1/PTPRM/SPARC
GOBP_ADENYLATE_CYCLASE_MODULATING_G_PROTEIN_COUPLED_RECEPTOR_SIGNALING_PATHWAY	GOBP_ADENYLATE_CYCLASE_MODULATING_G_PROTEIN_COUPLED_RECEPTOR_SIGNALING_PATHWAY	91	0.569338	1.68217	8.87803e-05	0.00319556	0.00257155	2095	tags=40%, list=15%, signal=34%	GNAI1/ADM/FLNA/AKAP12/S1PR1/LPAR1/LGR4/EDNRA/GNAI2/APLP1/FPR1/ABCA1/PDE4B/PRKACB/LGR5/PTHLH/GNAZ/GNG2/GNAS/PTGER2/RGS2/S1PR3/CALCRL/GPR65/GNA12/ADRB2/PTGFR/GABBR1/CXCL11/GNAL/ADCY5/GPR176/P2RY1/RGS1/GCG/ADORA1
GOBP_RESPONSE_TO_OXYGEN_RADICAL	GOBP_RESPONSE_TO_OXYGEN_RADICAL	21	0.758079	1.83386	8.89972e-05	0.00319556	0.00257155	1173	tags=38%, list=8%, signal=35%	SOD2/FBLN5/H19/CD36/NQO1/SOD1/ATP7A/NOS3
GOBP_CELLULAR_RESPONSE_TO_HORMONE_STIMULUS	GOBP_CELLULAR_RESPONSE_TO_HORMONE_STIMULUS	440	0.441928	1.37973	9.08092e-05	0.00324036	0.00260761	2086	tags=21%, list=15%, signal=19%	CAV1/SGK1/RAB31/RARRES2/GATA6/ANXA1/PAQR8/IGFBP7/ERRFI1/MAP1B/RDX/PGR/NCOA4/GJA1/CTSS/RARB/PRCP/ZDHHC7/HEYL/SERPINF1/DUSP1/NR4A3/ESR1/SFRP1/GAS2L1/LGR4/UBE2L3/TNC/FOXO1/GNAI2/FBXO32/ATP6V1E1/NR4A2/CACNA1H/BCL2L11/PRKAA1/STRN3/SLC39A14/PRKACB/LGR5/PER1/SLC9A1/TNFSF4/GNG2/PRKCI/STC1/SLC2A8/PID1/NR3C1/AR/RPS6KB1/HDAC1/PHIP/RAB12/CYP7B1/FECH/ATP6V0B/PTGER2/NCOA5/CA2/KLF9/MYO5A/IGF1R/PRKCQ/ATP6V0A2/PD…
GOBP_ANTIMICROBIAL_HUMORAL_RESPONSE	GOBP_ANTIMICROBIAL_HUMORAL_RESPONSE	47	0.646725	1.77707	9.27327e-05	0.00327968	0.00263925	1207	tags=26%, list=9%, signal=23%	LYZ/CXCL6/RARRES2/GATA6/GAPDH/S100A8/ANG/SPINK5/OCIAD2/DEFB1/ATP7A/CXCL1
GOBP_NEGATIVE_REGULATION_OF_PEPTIDASE_ACTIVITY	GOBP_NEGATIVE_REGULATION_OF_PEPTIDASE_ACTIVITY	146	0.518794	1.57196	9.30527e-05	0.00327968	0.00263925	2765	tags=34%, list=20%, signal=27%	SPOCK1/THBS1/PI15/SERPINE1/ITIH5/COL6A3/A2M/SERPINH1/SERPINF1/C3/GAPDH/C4B/TFPI2/SFRP2/COL4A3/ECM1/TIMP3/VEGFA/SPINK5/IGBP1/SPOCK2/SERPINB6/SERPINE2/NAIP/FNIP1/CD109/YWHAE/BST2/TIMP4/MMP9/RPS6KA3/IFI6/SERPING1/GPC3/COL7A1/GPX1/DDX3X/TIMP2/SERPINB9/BIN1/PICALM/UBE2Z/RAF1/UCHL5/PROS1/ARL6IP1/AGT/NLE1/RARRES1
GOBP_PLATELET_DEGRANULATION	GOBP_PLATELET_DEGRANULATION	92	0.568108	1.68092	9.44858e-05	0.0032948	0.00265141	842	tags=21%, list=6%, signal=20%	THBS1/PECAM1/RARRES2/SRGN/FN1/SERPINE1/VWF/FLNA/TGFB2/A2M/ISLR/CD36/ECM1/TGFB3/TIMP3/VEGFA/SPARC/VEGFC/SOD1
GOBP_POSITIVE_REGULATION_OF_BLOOD_VESSEL_ENDOTHELIAL_CELL_MIGRATION	GOBP_POSITIVE_REGULATION_OF_BLOOD_VESSEL_ENDOTHELIAL_CELL_MIGRATION	45	0.653634	1.78861	9.46287e-05	0.0032948	0.00265141	1574	tags=36%, list=11%, signal=32%	THBS1/ANXA1/PTGS2/AKT3/ETS1/PRKD1/ADAM17/HMOX1/VEGFA/ANGPT1/CD40/VEGFC/RHOJ/NOS3/SRPX2/PDPK1
GOMF_POTASSIUM_CHANNEL_REGULATOR_ACTIVITY	GOMF_POTASSIUM_CHANNEL_REGULATOR_ACTIVITY	31	0.694785	1.81683	9.89026e-05	0.00342287	0.00275447	2036	tags=48%, list=15%, signal=41%	CAV1/SGK1/KCNE3/ABCC9/FLNA/LRRC55/RASA1/YWHAE/AKAP9/KCNMB2/PIAS3/ADRB2/KCNS3/KCNAB2/KCNMB1
GOBP_POSITIVE_REGULATION_OF_SMOOTH_MUSCLE_CELL_PROLIFERATION	GOBP_POSITIVE_REGULATION_OF_SMOOTH_MUSCLE_CELL_PROLIFERATION	70	0.601221	1.7386	0.000102057	0.00350879	0.00282362	2650	tags=43%, list=19%, signal=35%	THBS1/PDGFRB/IGFBP5/GJA1/CDH13/S1PR1/ADAMTS1/TGM2/NR4A3/MMP2/SMPD3/HMOX1/GNAI2/RPS6KB1/PTAFR/PDGFD/IL6/IL18/CALCRL/EREG/FGFR2/PAK1/MMP9/MYB/IRAK1/MFN2/MAP3K5/FGF9/P2RY6/HBEGF
GOBP_DEFENSE_RESPONSE_TO_GRAM_NEGATIVE_BACTERIUM	GOBP_DEFENSE_RESPONSE_TO_GRAM_NEGATIVE_BACTERIUM	29	0.721968	1.86488	0.000102956	0.00350879	0.00282362	1386	tags=31%, list=10%, signal=28%	LYZ/CXCL6/RARRES2/SERPINE1/SSC5D/MPEG1/DEFB1/IL6/TLR4
GOCC_PLASMA_MEMBRANE_PROTEIN_COMPLEX	GOCC_PLASMA_MEMBRANE_PROTEIN_COMPLEX	356	0.448934	1.39301	0.000103218	0.00350879	0.00282362	3287	tags=35%, list=24%, signal=27%	CAV1/CDH5/GJC1/KCNE3/GNAI1/PORCN/ABCC9/CDH2/C7/CYBB/KCND2/GJA1/GNG11/CDH13/GLRB/LRRC55/SGIP1/GJA5/EVC2/TLR1/GNG7/GNAI2/OLFM2/LIN7A/CACNA1H/PDE4B/GNG4/KCNQ3/ITGB1/TLR6/IL18R1/GRIA3/CD40/SGCD/IL10RB/FAS/SCN7A/NOX4/TFRC/ITGBL1/ATP1B1/EVC/GNAZ/SGCE/GNG2/BMPR1B/CASP10/GNG12/GNAS/ALCAM/B2M/IL6/SSPN/NCF2/C6/TRAF1/IGF1R/CLTC/AKAP9/CALCRL/PSEN2/EPS15L1/KCNMA1/KCNJ8/KCNMB2/ERBB3/GNA12/CASP3/SHC1/KCNS3/APH1…
GOBP_MUSCLE_ORGAN_MORPHOGENESIS	GOBP_MUSCLE_ORGAN_MORPHOGENESIS	43	0.660476	1.79886	0.000105703	0.00357216	0.00287461	2118	tags=35%, list=15%, signal=30%	MYLK/WNT5A/HEG1/ZFPM2/TGFB2/S1PR1/ANKRD1/LIF/NRG1/ENG/FGFR2/ARID5B/FOXC1/SHOX2/COL11A1
GOBP_SMOOTH_MUSCLE_CELL_PROLIFERATION	GOBP_SMOOTH_MUSCLE_CELL_PROLIFERATION	106	0.547204	1.63314	0.000107624	0.00360524	0.00290124	2650	tags=38%, list=19%, signal=31%	THBS1/IGFBP3/PDGFRB/IGFBP5/SOD2/GJA1/CDH13/S1PR1/ADAMTS1/TGM2/NR4A3/MMP2/SMPD3/HMOX1/APOD/TGFB3/GNAI2/ANG/ELN/RPS6KB1/PTAFR/PDCD4/PDGFD/IL6/IL18/CALCRL/EREG/FGFR2/PAK1/MMP9/MYB/MEF2C/XRCC6/IRAK1/MFN2/NDRG4/MAP3K5/FGF9/P2RY6/HBEGF
GOBP_NEGATIVE_REGULATION_OF_GLYCOPROTEIN_METABOLIC_PROCESS	GOBP_NEGATIVE_REGULATION_OF_GLYCOPROTEIN_METABOLIC_PROCESS	14	0.812652	1.82184	0.000107938	0.00360524	0.00290124	786	tags=36%, list=6%, signal=34%	PTX3/ABCA7/ACER2/ITM2A/BACE2
GOBP_MUSCLE_CELL_DIFFERENTIATION	GOBP_MUSCLE_CELL_DIFFERENTIATION	232	0.481554	1.48219	0.000110317	0.00366341	0.00294804	3071	tags=35%, list=22%, signal=28%	DYSF/BVES/GREM1/GATA6/QKI/ADM/MYH11/CDH2/PDGFRB/IGFBP5/SOD2/SYNE1/CFL2/RARB/CDON/TMEM204/SIK1/PDGFRA/OLFM2/VEGFA/CACNA1H/SOX9/TMOD1/ANKRD1/SLC9A1/WNT4/KAT2A/CSRP2/ANK2/CTH/MYH9/PDCD4/NRG1/TMOD3/RGS2/RGS4/EREG/PTGFRN/ENG/FGFR2/DKK1/PAK1/CASP3/LMOD1/KLF5/PDLIM5/ASF1A/CAV2/HES1/ADAM12/WT1/COMP/AFG3L2/FHOD3/SHOX2/RORA/MEF2C/CDC42/EDNRB/SLC8A1/GPX1/AVPR1A/GATA4/SMO/BIN1/BHLHE41/CD53/FGF9/PRKAR1A/BDNF/…
GOBP_NEGATIVE_REGULATION_OF_HYDROLASE_ACTIVITY	GOBP_NEGATIVE_REGULATION_OF_HYDROLASE_ACTIVITY	287	0.462641	1.42963	0.000112242	0.00370593	0.00298226	3080	tags=29%, list=22%, signal=23%	SPOCK1/THBS1/CNN3/PI15/ANXA1/CSRNP3/SERPINE1/ITIH5/RDX/COL6A3/TGFB2/IQGAP2/PTX3/A2M/SERPINH1/LGALS3/SERPINF1/C3/GAPDH/C4B/TFPI2/SFRP2/GPS1/COL4A3/ECM1/TIMP3/GNAI2/ELFN1/VEGFA/SPRY1/SPINK5/SLC39A14/PTPRN2/PLA2R1/IGBP1/SPOCK2/SERPINB6/SERPINE2/NAIP/FNIP1/SH3RF2/CD109/YWHAE/GPATCH2/RGS2/PPP1R8/PPP1R1B/CNST/BST2/TIMP4/MMP9/MASTL/RPS6KA3/IFI6/SERPING1/GPC3/OXA1L/COL7A1/ARRB1/GPX1/DDX3X/TIMP2/IFIT1/SER…
GOBP_REGULATION_OF_MAP_KINASE_ACTIVITY	GOBP_REGULATION_OF_MAP_KINASE_ACTIVITY	239	0.47508	1.46414	0.000117116	0.00384477	0.00309399	2252	tags=26%, list=16%, signal=22%	CAV1/THBS1/ROBO1/PDGFC/WNT5A/TAB2/UCHL1/PDGFRB/FZD4/MDFIC/FLT1/PTPRC/DUSP1/SFRP1/LPAR1/SFRP2/GPS1/TGFB3/ARHGEF5/GADD45B/SAA1/PEA15/VEGFA/FPR1/SPRY1/PRKAA1/MLKL/TLR6/CD40/MAP2K6/SOD1/MAPK10/DVL3/DTNBP1/MAPKAPK2/HTR2B/MAPK8IP1/PDCD4/PDGFD/NRG1/DUSP19/RGS2/TLR4/CRKL/FGF1/IGF1R/RGS4/TGFA/DKK1/PAK1/MAP4K5/SHC1/UBE2N/IRAK3/MAP3K11/ITGA1/IRAK1/RIPK2/TIAM1/ARRB1/ADAM8/UBC
GOBP_NEGATIVE_REGULATION_OF_CARTILAGE_DEVELOPMENT	GOBP_NEGATIVE_REGULATION_OF_CARTILAGE_DEVELOPMENT	18	0.797138	1.87464	0.000118594	0.00387116	0.00311523	1314	tags=39%, list=9%, signal=35%	EFEMP1/GREM1/SNAI2/RARB/SOX9/PTHLH/ADAMTS7
GOBP_INTERLEUKIN_8_PRODUCTION	GOBP_INTERLEUKIN_8_PRODUCTION	58	0.625328	1.77308	0.000121333	0.00393818	0.00316916	1460	tags=31%, list=11%, signal=28%	WNT5A/CHI3L1/ANXA1/SERPINE1/SSC5D/F2R/PTPRC/TLR1/ANXA4/CD14/CLEC7A/TLR7/TLR6/TLR8/IL6/HSPA1B/TLR4/F3
GOBP_PHAGOCYTOSIS	GOBP_PHAGOCYTOSIS	218	0.485148	1.49122	0.00012596	0.0040654	0.00327154	2686	tags=29%, list=19%, signal=24%	DYSF/THBS1/RAB31/PECAM1/ANXA1/PTX3/ABCA7/CD93/MSR1/ACTG1/PTPRC/IGLL5/TYROBP/C3/TGM2/CD36/C4B/FCGR3A/FGR/CD14/ARPC5/RAB7A/SYT7/XKR9/AXL/HCK/CLEC7A/ITGB1/SOD1/ARHGAP12/MYO10/ARHGAP25/MYH9/SCARB1/PLSCR1/MERTK/NCF2/TLR4/MFGE8/RAB11FIP2/RAB34/SYT11/CAMK1D/PIP5K1A/LIMK1/PAK1/MYO1C/HSP90AB1/MET/PIK3CA/ADORA1/ACTB/CDC42/FCER1G/TUB/CCL2/PLA2G6/RAB5A/RHOBTB2/ATG5/PEAR1/P2RY6/RAB14/CRK
GOBP_REGULATION_OF_GROWTH	GOBP_REGULATION_OF_GROWTH	463	0.428769	1.34023	0.000128102	0.00408857	0.00329019	3161	tags=30%, list=23%, signal=24%	SPOCK1/MT2A/SGK1/SEMA3C/GREM1/DCBLD2/WNT5A/GATA6/IGFBP7/FN1/BASP1/IGFBP3/MAP1B/SPP1/ZFPM2/NDUFS3/IGFBP5/TGFB2/NRP1/NKD1/TMEM8B/GJA1/NDN/APBB2/DIO3/SFRP1/ADAM17/SFRP2/S100A8/SEMA3D/SEMA5A/CPNE5/SEMA3E/SEMA3F/VEGFA/KRT17/BCL2L11/KAT5/GNG4/OLFM1/OSGIN2/KCTD21/CXCL16/AGR2/SOD1/SASH3/SLC9A1/DBN1/CCNB2/HNF4A/SERPINE2/AR/RPS6KB1/WWC2/GLI1/TAF9B/LGMN/HSPA1B/LRP12/YEATS4/RGS2/CRKL/PRKCQ/CDK5R1/GDI1/RGS4/F…
GOBP_RESPONSE_TO_OXYGEN_LEVELS	GOBP_RESPONSE_TO_OXYGEN_LEVELS	301	0.463125	1.43124	0.000128102	0.00408857	0.00329019	3042	tags=33%, list=22%, signal=26%	CAV1/THBS1/GATA6/PTGS2/ADM/PDGFRB/CYBB/SOD2/TGFB2/ETS1/APOLD1/PLOD2/PLAU/KCND2/PMAIP1/HIPK2/TRPC6/CITED2/SFRP1/MMP2/ADAM17/LPAR1/EDNRA/FOXO1/HMOX1/TGFB3/ANG/POSTN/NR4A2/VEGFA/PRKAA1/OXTR/PDPN/VEGFC/FAS/NOX4/MALAT1/ATP1B1/ANKRD1/LDHA/SLC9A1/MTHFR/ATP7A/STC1/SLC2A8/BNIP3L/MDM2/NDNF/VASN/PSMD1/ATP6V0A2/KCNMA1/MPL/CD38/PAK1/CASP3/CUL2/ITPR2/HDAC2/COL1A1/ENO1/CREB1/SCFD1/DDIT4/ZFP36L1/AQP3/MYB/PSMC1/K…
GOBP_REGULATION_OF_CHEMOTAXIS	GOBP_REGULATION_OF_CHEMOTAXIS	157	0.513008	1.56165	0.000131552	0.00417549	0.00336013	1553	tags=22%, list=11%, signal=20%	THBS1/ROBO1/SEMA3C/GREM1/WNT5A/RARRES2/SCG2/SERPINE1/PDGFRB/NRP1/IL16/CDH13/S1PR1/TPBG/PRKD1/DUSP1/MCU/ADAM17/LPAR1/SEMA3D/PDGFRA/SEMA5A/SEMA3E/SEMA3F/VEGFA/C3AR1/VEGFC/SUCNR1/LGMN/PDGFD/IL6/BST1/FGF1/F3/CAMK1D
GOBP_CONVERGENT_EXTENSION	GOBP_CONVERGENT_EXTENSION	13	0.82701	1.84395	0.000135473	0.00427632	0.00344127	440	tags=31%, list=3%, signal=30%	WNT5A/NKD1/SFRP1/SFRP2
GOBP_ACTIN_FILAMENT_BUNDLE_ORGANIZATION	GOBP_ACTIN_FILAMENT_BUNDLE_ORGANIZATION	127	0.527293	1.59213	0.000138975	0.00436291	0.00351096	2207	tags=31%, list=16%, signal=26%	PHLDB2/FERMT2/RDX/PLS3/FLNA/NRP1/ACTG1/S1PR1/PFN2/PFN1/MARCKS/SFRP1/USH1C/LPAR1/CALD1/TGFB3/ARHGEF5/FHDC1/NOX4/SLC9A1/ELN/WNT4/LCP1/DPYSL3/DLC1/CLASP1/LIMA1/SORBS3/GPR65/LIMK1/PAK1/PAWR/EPS8/ALMS1/ARHGAP6/MET/PLS1/CDC42/ARRB1
GOBP_REGULATION_OF_COLLAGEN_METABOLIC_PROCESS	GOBP_REGULATION_OF_COLLAGEN_METABOLIC_PROCESS	27	0.721692	1.83139	0.000140147	0.00437577	0.0035213	1995	tags=52%, list=14%, signal=44%	VIM/ERRFI1/FAP/PDGFRB/F2R/MFAP4/TGFB3/ITGB1/WNT4/IL6/ENG/HDAC2/CREB3L1/MYB
GOBP_PROSTATE_GLAND_MORPHOGENESIS	GOBP_PROSTATE_GLAND_MORPHOGENESIS	20	0.759075	1.83806	0.000141677	0.00437631	0.00352174	1646	tags=50%, list=12%, signal=44%	WNT5A/ESR1/SFRP1/TNC/SULF1/SOX9/AR/CYP7B1/FGFR2/FEM1B
GOBP_CELL_MIGRATION_INVOLVED_IN_SPROUTING_ANGIOGENESIS	GOBP_CELL_MIGRATION_INVOLVED_IN_SPROUTING_ANGIOGENESIS	45	0.646246	1.76839	0.000141687	0.00437631	0.00352174	933	tags=27%, list=7%, signal=25%	THBS1/ROBO1/GREM1/ANXA1/PTGS2/AKT3/NRP1/CLEC14A/HMOX1/VEGFA/MMRN2/RHOJ
GOMF_GROWTH_FACTOR_RECEPTOR_BINDING	GOMF_GROWTH_FACTOR_RECEPTOR_BINDING	93	0.566876	1.68059	0.000147358	0.00452712	0.0036431	2650	tags=31%, list=19%, signal=25%	FLRT2/EFEMP1/CDH5/GREM1/PDGFC/IL1R1/PDGFRB/ADAM17/ECM1/PDGFRA/VEGFA/VEGFC/AGR2/PLSCR1/PDGFD/IL6/FGF1/EREG/TGFA/SHC1/ATXN2/FER/TOLLIP/ERBB4/IL6ST/SOCS5/FGF9/AREG/HBEGF
GOBP_GRANULOCYTE_MIGRATION	GOBP_GRANULOCYTE_MIGRATION	96	0.55049	1.63012	0.00014842	0.0045355	0.00364984	2255	tags=29%, list=16%, signal=25%	THBS1/CXCL6/PECAM1/IL1R1/RARRES2/ANXA1/SCG2/TGFB2/LGALS3/MCU/S100A8/SAA1/PDE4B/C3AR1/PREX1/CXCL1/BST1/CCL18/CAMK1D/CCL22/CXCL11/CCL11/SRP54/CSF3R/ITGA1/FCER1G/ADAM8/CCL2
GOCC_NEUROMUSCULAR_JUNCTION	GOCC_NEUROMUSCULAR_JUNCTION	50	0.632432	1.76149	0.000151387	0.00460167	0.00370309	1503	tags=28%, list=11%, signal=25%	SPOCK1/TUBA1A/F2R/COL4A5/LAMA2/POSTN/LAMB2/ITGB1/SYNC/MYH9/SERPINE2/CRKL/CDK5R1/PSEN2
GOBP_TUBE_FORMATION	GOBP_TUBE_FORMATION	109	0.540756	1.62108	0.000153379	0.00463769	0.00373207	1732	tags=25%, list=12%, signal=22%	GREM1/WNT5A/ADM/TGFB2/TCTN1/TGM2/SFRP1/SFRP2/VEGFA/BCL2L11/SOX9/PRKACB/WNT4/MTHFR/MIB1/KAT2A/DVL3/PODXL/DLC1/SHROOM3/PHACTR4/SEC24B/FGFR2/CASP3/MTHFD1L/PTK7/CELSR1
GOBP_MYELOID_LEUKOCYTE_MIGRATION	GOBP_MYELOID_LEUKOCYTE_MIGRATION	147	0.514535	1.56178	0.000170616	0.00513189	0.00412977	2255	tags=27%, list=16%, signal=23%	THBS1/CXCL6/GREM1/PECAM1/IL1R1/RARRES2/ANXA1/SCG2/SERPINE1/TGFB2/FLT1/LGALS3/DUSP1/MCU/S100A8/SAA1/VEGFA/PDE4B/C3AR1/VEGFC/PREX1/LGMN/CXCL1/PDGFD/IL6/BST1/CCL18/CX3CR1/CAMK1D/CCL22/CXCL11/CCL11/SRP54/CSF3R/ITGA1/FCER1G/EDNRB/CCR1/ADAM8/CCL2
GOMF_TRANSMEMBRANE_RECEPTOR_PROTEIN_KINASE_ACTIVITY	GOMF_TRANSMEMBRANE_RECEPTOR_PROTEIN_KINASE_ACTIVITY	65	0.609888	1.75017	0.000177648	0.00531555	0.00427757	2228	tags=35%, list=16%, signal=30%	EFEMP1/DDR2/PDGFRB/LTBP1/NRP1/NRP2/FLT1/EPHB3/EPHA3/PDGFRA/AXL/PDGFRL/BMPR1B/MERTK/IGF1R/ENG/FGFR2/ERBB3/EFNB3/ERBB4/MET/ACVRL1/ACVR1B
GOBP_NEGATIVE_CHEMOTAXIS	GOBP_NEGATIVE_CHEMOTAXIS	39	0.662417	1.77043	0.000189564	0.00564272	0.00454085	621	tags=23%, list=4%, signal=22%	FLRT2/ROBO1/SEMA3C/WNT5A/NRP2/SEMA3D/SEMA5A/SEMA3E/SEMA3F
GOBP_REGULATION_OF_REPRODUCTIVE_PROCESS	GOBP_REGULATION_OF_REPRODUCTIVE_PROCESS	84	0.572352	1.66999	0.000191106	0.00565931	0.0045542	1168	tags=30%, list=8%, signal=27%	PDE3A/WNT5A/ZFPM2/NUPR1/GJA1/SERPINF1/DUSP1/CITED2/ESR1/SFRP1/B4GALT1/SULF1/VEGFA/CACNA1H/OXTR/SOX9/DEFB1/DHX37/PRKACB/WNT4/SNAI1/AR/PTAFR/RAD1/LIF
GOBP_ADENYLATE_CYCLASE_INHIBITING_G_PROTEIN_COUPLED_RECEPTOR_SIGNALING_PATHWAY	GOBP_ADENYLATE_CYCLASE_INHIBITING_G_PROTEIN_COUPLED_RECEPTOR_SIGNALING_PATHWAY	35	0.682638	1.79236	0.000197524	0.00581936	0.004683	2095	tags=49%, list=15%, signal=41%	GNAI1/FLNA/AKAP12/S1PR1/LPAR1/EDNRA/GNAI2/GNAZ/RGS2/S1PR3/GABBR1/GNAL/ADCY5/GPR176/P2RY1/RGS1/ADORA1
GOBP_EPIDERMIS_DEVELOPMENT	GOBP_EPIDERMIS_DEVELOPMENT	206	0.481142	1.47873	0.000198584	0.00582075	0.00468411	2251	tags=27%, list=16%, signal=23%	WNT5A/APCDD1/GATA6/ANXA1/ERRFI1/IGFBP5/TGFB2/PALLD/USH1C/LGR4/DSC3/EMP1/KRT23/KRT17/NAB2/FST/SPINK5/ABCA12/SOX9/SOD1/FLG/LGR5/PTHLH/INTU/ATP7A/SNAI1/HDAC1/ATP2C1/GLI1/LDB2/ZBED2/KRT7/CD109/EREG/SEC24B/FGFR2/PIP5K1A/GRHL1/CASP3/CLIC4/KEAP1/HDAC2/FOXC1/PKP4/HES1/ZFP36L1/AQP3/PRKCH/PLS1/NOM1/PKP3/SLC44A4/SCEL/COL7A1/ACVR1B/LAMC2
GOBP_REGULATION_OF_CARTILAGE_DEVELOPMENT	GOBP_REGULATION_OF_CARTILAGE_DEVELOPMENT	48	0.633037	1.74661	0.000202997	0.0059199	0.0047639	1314	tags=29%, list=9%, signal=26%	EFEMP1/GREM1/WNT5A/TRPS1/SNAI2/RARB/SMPD3/SOX9/PKDCC/MBOAT2/PTHLH/KAT2A/BMPR1B/ADAMTS7
GOMF_TRANSMEMBRANE_RECEPTOR_PROTEIN_TYROSINE_KINASE_ACTIVITY	GOMF_TRANSMEMBRANE_RECEPTOR_PROTEIN_TYROSINE_KINASE_ACTIVITY	50	0.628534	1.75063	0.000208937	0.0060388	0.00485959	2042	tags=36%, list=15%, signal=31%	EFEMP1/DDR2/PDGFRB/NRP1/NRP2/FLT1/EPHB3/EPHA3/PDGFRA/AXL/PDGFRL/MERTK/IGF1R/FGFR2/ERBB3/EFNB3/ERBB4/MET
GOBP_SYNAPTIC_SIGNALING	GOBP_SYNAPTIC_SIGNALING	378	0.445205	1.38441	0.000209722	0.0060388	0.00485959	2606	tags=27%, list=19%, signal=23%	GJC1/SRGN/MAP1B/PTPRD/GNAI1/CDH2/F2R/TPRG1L/SLC12A2/KCND2/AKAP12/NOVA1/GLRB/LAMA2/TPBG/MAP1A/TYROBP/PCDHB6/RASGRF1/NQO1/PMP22/SLC1A3/DGKI/PLCL1/DTNA/LRRC4C/SYT7/GNAI2/MME/LIN7A/STX2/KCNQ3/ITGB1/OXTR/LZTS1/KCMF1/PTPRN2/BCHE/EGR2/DBN1/KAT2A/RHOT1/SNCAIP/GABARAP/CPEB3/PLCB4/NLGN2/SERPINE2/PAIP2/AMPH/DTNBP1/LGMN/PPP3CB/SNAP23/HTR2B/PCDHB5/CNTN4/VDAC1/CRKL/SLC1A4/CDK5R1/SYT11/AKAP9/RGS4/RELN/CX3CR1/CR…
GOBP_NEPHRON_DEVELOPMENT	GOBP_NEPHRON_DEVELOPMENT	102	0.550032	1.63429	0.000210228	0.0060388	0.00485959	2933	tags=46%, list=21%, signal=37%	GREM1/PECAM1/BASP1/PDGFRB/HEYL/LGR4/COL4A3/PDGFRA/LAMB2/SULF1/VEGFA/ACTA2/NID1/SOX9/ANGPT1/WWTR1/ENPEP/WNT4/ADAMTS16/LIF/PODXL/PDGFD/AHI1/FGF1/DCHS2/PKD2/COL4A4/FOXC1/MPV17/NUP107/HES1/WT1/AQP11/MEF2C/GPC3/CD34/SMO/KLF15/NOTCH2/PTPRO/AGT/PLCE1/SALL1/NUP133/SULF2/MYO1E/DCHS1
GOBP_BASEMENT_MEMBRANE_ORGANIZATION	GOBP_BASEMENT_MEMBRANE_ORGANIZATION	25	0.716951	1.77767	0.000217147	0.00620652	0.00499455	1212	tags=44%, list=9%, signal=40%	FLRT2/CAV1/PHLDB2/PXDN/COL4A1/CTSS/NID2/LAMB2/NID1/LAMB1/CLASP1
GOBP_AXIS_ELONGATION	GOBP_AXIS_ELONGATION	23	0.734573	1.80927	0.000218868	0.00622474	0.00500922	1729	tags=48%, list=12%, signal=42%	WNT5A/NKD1/ESR1/SFRP1/SFRP2/TNC/SPRY1/SOX9/FGF1/FGFR2/PTK7
GOBP_DEVELOPMENT_OF_PRIMARY_FEMALE_SEXUAL_CHARACTERISTICS	GOBP_DEVELOPMENT_OF_PRIMARY_FEMALE_SEXUAL_CHARACTERISTICS	68	0.591108	1.70211	0.000220917	0.00625207	0.00503121	2228	tags=38%, list=16%, signal=32%	ZFPM2/PTX3/PGR/NUPR1/FZD4/ADAMTS1/ESR1/SFRP1/PDGFRA/ANG/VEGFA/FST/SOD1/IDH1/WNT4/HSPA5/BMPR1B/CEBPB/EREG/ARID5B/CASP3/FOXC1/NUP107/WT1/ARRB1/ACVR1B
GOBP_POSITIVE_REGULATION_OF_CELL_PROJECTION_ORGANIZATION	GOBP_POSITIVE_REGULATION_OF_CELL_PROJECTION_ORGANIZATION	270	0.458226	1.4148	0.000223549	0.00629553	0.00506618	3240	tags=34%, list=23%, signal=26%	ROBO1/NIN/WNT5A/FN1/MAP1B/CREB3L2/PTPRD/FLNA/NRP1/FZD4/OCLN/VLDLR/CEP120/PLXNC1/CDC42EP5/PFN1/PRKD1/SERPINF1/STMN2/EPHA3/NEGR1/TGFB3/SEMA5A/VEGFA/DZIP1/FZD1/ANKRD1/PLXND1/DBN1/KAT2A/HSPA5/PRKCI/ATP7A/DVL3/UBE2V2/DPYSL3/ENPP2/CNTN1/KALRN/ABI2/RGS2/NDNF/GDI1/RELN/CAMK1D/CRTC1/PLEKHM1/FMR1/CUX1/LIMK1/PAK1/PTK7/ABL2/CEP135/EPS8/CAPRIN2/SHOX2/APC/PARP6/PIK3CA/CDC42/KATNB1/ENC1/TAPT1/TIAM1/NDRG4/FBXO31…
GOBP_ENDOTHELIAL_CELL_DEVELOPMENT	GOBP_ENDOTHELIAL_CELL_DEVELOPMENT	56	0.601634	1.69894	0.000232111	0.00650478	0.00523457	2263	tags=36%, list=16%, signal=30%	CDH5/PECAM1/HEG1/RDX/COL15A1/VEZF1/VEGFA/TJP3/MSN/STC1/COL18A1/ARHGEF26/S1PR3/ENG/CLIC4/CLDN1/MARVELD2/CCM2/MET/GPX1
GOBP_HUMORAL_IMMUNE_RESPONSE_MEDIATED_BY_CIRCULATING_IMMUNOGLOBULIN	GOBP_HUMORAL_IMMUNE_RESPONSE_MEDIATED_BY_CIRCULATING_IMMUNOGLOBULIN	33	0.685318	1.78715	0.000236021	0.00658223	0.0052969	734	tags=27%, list=5%, signal=26%	C1R/C1S/C7/PTPRC/IGLL5/C3/C4B/C1QC/C1QB
GOBP_REGULATION_OF_ACTIN_FILAMENT_BASED_PROCESS	GOBP_REGULATION_OF_ACTIN_FILAMENT_BASED_PROCESS	296	0.449454	1.38929	0.000239241	0.0066398	0.00534323	3091	tags=33%, list=22%, signal=26%	CAV1/PHLDB2/FERMT2/RDX/PDGFRB/ADD3/FLNA/NRP1/IQGAP2/ACTG1/CFL2/S1PR1/CDC42EP5/PFN2/PFN1/GJA5/SFRP1/RHOBTB3/EPHA3/LPAR1/ARPC5/PDGFRA/TGFB3/ARHGEF5/SEMA5A/SEMA3E/PDE4B/HCK/TMOD1/PDPN/RASA1/NOX4/SLC9A1/ELN/WNT4/DBN1/PREX1/STC1/ANK2/WASF1/MYH9/ARF6/DLC1/CLASP1/LIMA1/BST1/ABI2/TMOD3/CDK5R1/AKAP9/SORBS3/RGS4/GPR65/KANK4/LIMK1/BST2/VILL/PAK1/MYO1C/SSH3/CELSR1/LMOD1/ARFIP2/FER/ABL2/CCL11/EPS8/ALMS1/ARHGA…
GOBP_POSITIVE_REGULATION_OF_EPITHELIAL_CELL_MIGRATION	GOBP_POSITIVE_REGULATION_OF_EPITHELIAL_CELL_MIGRATION	126	0.529146	1.59814	0.000242389	0.00669483	0.00538751	1403	tags=24%, list=10%, signal=22%	THBS1/WNT5A/ANXA1/PTGS2/AKT3/TGFB2/NRP1/ETS1/NRP2/PFN1/PRKD1/ADAM17/HMOX1/SEMA5A/VEGFA/SOX9/ANGPT1/SPARC/CD40/VEGFC/RHOJ/SCARB1/ARF6/LGMN/NOS3/CLASP1/ENPP2/HAS2/SRPX2/FGF1
GOBP_MYELOID_LEUKOCYTE_CYTOKINE_PRODUCTION	GOBP_MYELOID_LEUKOCYTE_CYTOKINE_PRODUCTION	24	0.714899	1.76578	0.000244261	0.00671426	0.00540315	2139	tags=46%, list=15%, signal=39%	WNT5A/TGFB2/LAPTM5/NR4A3/CD36/HMOX1/TGFB3/GPRC5B/TLR4/IRAK3/BCL6
GOBP_NEGATIVE_REGULATION_OF_CELL_DIFFERENTIATION	GOBP_NEGATIVE_REGULATION_OF_CELL_DIFFERENTIATION	426	0.432763	1.34947	0.000248355	0.00679427	0.00546754	2680	tags=26%, list=19%, signal=21%	CAV1/EFEMP1/SEMA3C/GREM1/ZEB1/WNT5A/ANXA1/SPP1/HOOK3/SNAI2/FERMT2/ZFPM2/CLDN18/IGFBP5/TGFB2/NRP1/HOPX/RARB/TRPC6/MAFB/DIO3/SFRP1/SFRP2/C1QC/DAAM2/SEMA3D/FOXO1/SEMA5A/POSTN/FGL2/SEMA3E/SEMA3F/VEGFA/TRIM11/ABCA1/SPRY1/FST/SOX9/OCIAD2/VEGFC/WWTR1/PTHLH/WNT4/MIB1/TNFSF4/LEO1/TMEM98/SNAI1/B2M/PDCD4/IL6/FSTL3/NCAPG2/ADAMTS7/IL18/RGS2/CNTN4/TLR4/RUNX1T1/PAF1/CDK5R1/GDI1/VASN/S1PR3/RGS4/EREG/DKK1/PAK1/MB…
GOBP_TEMPERATURE_HOMEOSTASIS	GOBP_TEMPERATURE_HOMEOSTASIS	131	0.52279	1.57877	0.000251622	0.00685105	0.00551322	2461	tags=32%, list=18%, signal=27%	LAMA4/CAV1/PDGFC/PTGS2/ZNF423/GJA1/NOVA1/PTGES/CD36/ADAM17/LGR4/PLCL1/FOXO1/VEGFA/OXTR/IL18R1/MAP2K6/ELOVL6/GNAS/CEBPB/IL18/ADAMTS5/TLR4/IGF1R/G0S2/TFE3/ADRB2/ZNF516/ALDH1A1/PRLR/PLAC8/ACOT13/ALMS1/APC/ADORA1/EDNRB/MFN2/PEMT/GPX1/THRA/LPIN1/ARRDC3
GOBP_POSITIVE_REGULATION_OF_CYTOKINE_PRODUCTION_INVOLVED_IN_IMMUNE_RESPONSE	GOBP_POSITIVE_REGULATION_OF_CYTOKINE_PRODUCTION_INVOLVED_IN_IMMUNE_RESPONSE	44	0.636901	1.741	0.00025767	0.00698263	0.00561911	1386	tags=32%, list=10%, signal=29%	IL1R1/WNT5A/LAPTM5/NR4A3/CD36/CLEC7A/IL18R1/SASH3/TNFSF4/B2M/IL6/GPRC5B/IL18/TLR4
GOBP_POSITIVE_REGULATION_OF_CELLULAR_COMPONENT_BIOGENESIS	GOBP_POSITIVE_REGULATION_OF_CELLULAR_COMPONENT_BIOGENESIS	406	0.434923	1.35387	0.000271139	0.00731311	0.00588506	3105	tags=30%, list=22%, signal=24%	FLRT2/CAV1/PHLDB2/CDH5/NIN/MAP1B/PTPRD/FERMT2/ASAP1/FLNA/NRP1/IQGAP2/OCLN/CEP120/TPBG/CDC42EP5/EPHB3/PFN2/PFN1/LGALS3/CD36/ESR1/SFRP1/LPAR1/SMPD3/ARPC5/CLIP1/RAB7A/TGFB3/ARHGEF5/VEGFA/NAV3/ABCA1/BCL2L11/DZIP1/HCK/AMIGO2/CLEC7A/MSN/TLR6/OXTR/SOX9/LIMS1/NOX4/TFRC/WNT4/ATP7A/LCP1/NLGN2/WASF1/ARF6/UBE2V2/FNIP1/DPYSL3/LDB2/CLASP1/HSPA1B/NRG1/ABI2/SRPX2/TLR4/PLK4/CDK5R1/AKAP9/GNL3L/SORBS3/GPR65/PLEKHM1…
GOBP_PROSTATE_GLAND_DEVELOPMENT	GOBP_PROSTATE_GLAND_DEVELOPMENT	33	0.681557	1.77734	0.00027605	0.00741079	0.00596366	1646	tags=42%, list=12%, signal=37%	WNT5A/ANXA1/SERPINF1/ESR1/SFRP1/TNC/SULF1/SOX9/AR/GLI1/CYP7B1/FGFR2/WDR77/FEM1B
GOCC_SARCOLEMMA	GOCC_SARCOLEMMA	93	0.558941	1.65706	0.000277515	0.00741547	0.00596743	1283	tags=25%, list=9%, signal=23%	CAV1/DYSF/BVES/ANXA1/RDX/CDH2/COL6A3/COL6A2/LAMA2/BGN/TGFB3/STAC/ITGB1/SGCD/ATP1B1/SLC9A1/SGCE/SYNC/ANK2/DTNBP1/PPP3CB/SSPN/AHNAK
GOBP_VENTRICULAR_SEPTUM_DEVELOPMENT	GOBP_VENTRICULAR_SEPTUM_DEVELOPMENT	55	0.612334	1.72217	0.000279833	0.00743031	0.00597937	2909	tags=36%, list=21%, signal=29%	ROBO1/WNT5A/HEG1/ZFPM2/TGFB2/HEYL/GJA5/CITED2/STRA6/FGFR2/MIR17HG/PTK7/HES1/SOX4/GATA4/LMO4/TGFBR3/SALL1/SLIT2/NPRL3
GOBP_CGMP_MEDIATED_SIGNALING	GOBP_CGMP_MEDIATED_SIGNALING	14	0.792816	1.77737	0.000280657	0.00743031	0.00597937	1176	tags=36%, list=8%, signal=33%	PDE3A/THBS1/PDE10A/CD36/HTR2B
GOBP_REGULATION_OF_CYTOSKELETON_ORGANIZATION	GOBP_REGULATION_OF_CYTOSKELETON_ORGANIZATION	398	0.433773	1.34935	0.000284809	0.00750564	0.00603999	3288	tags=33%, list=24%, signal=26%	PHLDB2/CDH5/NIN/MAP1B/GNAI1/FERMT2/RDX/PDGFRB/ADD3/FLNA/NRP1/IQGAP2/OCLN/ACTG1/CFL2/CEP120/S1PR1/CDC42EP5/PFN2/TTBK2/PFN1/MAP1A/STMN2/SFRP1/RHOBTB3/GAS2L1/EPHA3/LPAR1/S100A8/ARPC5/CLIP1/PDGFRA/TGFB3/ARHGEF5/NES/SEMA5A/SEMA3E/CAPN6/NAV3/PRKAA1/HCK/TMOD1/RASA1/NOX4/SLC9A1/ELN/WNT4/DBN1/KAT2A/PREX1/WASF1/ARF6/DLC1/CLASP1/LIMA1/HSPA1B/BST1/ABI2/TMOD3/CLTC/PLK4/CDK5R1/AKAP9/SORBS3/RGS4/AFAP1/SENP6/GPR…
GOBP_COLLAGEN_BIOSYNTHETIC_PROCESS	GOBP_COLLAGEN_BIOSYNTHETIC_PROCESS	29	0.70518	1.82152	0.000287108	0.00751198	0.00604509	2175	tags=55%, list=16%, signal=47%	VIM/ERRFI1/PDGFRB/F2R/SERPINH1/TGFB3/RCN3/WNT4/IL6/ENG/HDAC2/COL1A1/COL5A1/CREB3L1/MYB/ADAMTS3
GOBP_COLLAGEN_ACTIVATED_TYROSINE_KINASE_RECEPTOR_SIGNALING_PATHWAY	GOBP_COLLAGEN_ACTIVATED_TYROSINE_KINASE_RECEPTOR_SIGNALING_PATHWAY	10	0.860186	1.79181	0.000287665	0.00751198	0.00604509	493	tags=50%, list=4%, signal=48%	COL4A2/DDR2/COL4A5/COL4A1/COL4A3
GOBP_REGULATION_OF_PRODUCTION_OF_MOLECULAR_MEDIATOR_OF_IMMUNE_RESPONSE	GOBP_REGULATION_OF_PRODUCTION_OF_MOLECULAR_MEDIATOR_OF_IMMUNE_RESPONSE	103	0.542135	1.61192	0.000291507	0.00757153	0.00609302	2139	tags=28%, list=15%, signal=24%	IL1R1/WNT5A/TGFB2/LAPTM5/PTPRC/NR4A3/CD36/HMOX1/TGFB3/SPINK5/THOC1/CLEC7A/ANGPT1/IL18R1/CD40/SASH3/TFRC/TNFSF4/B2M/IL6/GPRC5B/IL18/TLR4/BST2/IL33/IRAK3/NLRP3/RSAD2/BCL6
GOBP_MORPHOGENESIS_OF_A_BRANCHING_STRUCTURE	GOBP_MORPHOGENESIS_OF_A_BRANCHING_STRUCTURE	142	0.517707	1.56866	0.000292581	0.00757153	0.00609302	2947	tags=34%, list=21%, signal=27%	SEMA3C/GREM1/WNT5A/ADM/NRP1/COL4A1/PGR/TGM2/ESR1/SFRP1/SFRP2/PKHD1/LGR4/EDNRA/TNC/SEMA3E/SULF1/VEGFA/SPRY1/SOX9/PLXND1/WNT4/AR/ADAMTS16/FGF1/ENG/FGFR2/PAK1/FEM1B/PKD2/CLIC4/CELSR1/CCL11/WT1/MET/SHOX2/GPC3/SEMA3A/SMO/TP63/RTN4/AGT/MMP14/ESRP2/SALL1/SLIT2/DCHS1/FOXF1
GOCC_BASAL_PART_OF_CELL	GOCC_BASAL_PART_OF_CELL	182	0.485156	1.48597	0.000294512	0.0075838	0.00610289	2974	tags=36%, list=21%, signal=29%	PHLDB2/ANXA1/FAP/SLC16A3/CDH2/SLC12A2/SLC40A1/PRCP/ATP7B/SLC1A3/B4GALT1/LIN7A/TRPC4/STX2/SLC39A14/MSN/SLC14A1/PDPN/TFRC/ATP1B1/SLC9A1/ATP7A/ANK2/NAIP/CLASP1/CA2/SLC4A2/SLC9B2/DST/SLC16A1/TGFA/CD38/MYO1C/ERBB3/PKD2/CD1D/CLDN1/BEST1/AQP3/HSP90AB1/MARVELD2/P2RY1/ERBB4/SLCO4C1/MET/ADORA1/ITGA1/ARRB1/SLC16A10/NDRG4/CD34/SLC3A2/LIN7C/SLC2A9/SLC4A7/FLOT1/PHLDB1/CLDN11/SLC7A7/CA11/SLC26A6/ABCC5/P2RY12/SL…
GOBP_TISSUE_HOMEOSTASIS	GOBP_TISSUE_HOMEOSTASIS	188	0.48937	1.49788	0.000295695	0.0075838	0.00610289	2993	tags=34%, list=22%, signal=27%	LYZ/CDH5/PECAM1/SPP1/CLDN18/F2R/AKT3/SLC12A2/OCLN/GJA1/ACTG1/LAMA2/S1PR1/TFF1/USH1C/LIPA/VEGFA/TFF2/RCN3/ITGB1/TJP3/ABCA12/SOX9/ANGPT1/WWTR1/SOD1/SASH3/TFRC/LAMC1/AZGP1/GNAS/B2M/NOS3/LDB2/IL20RB/IL6/ZG16B/CA2/LPCAT1/TLR4/PLEKHM1/CD38/ADRB2/FOXC1/CLDN1/ACTB/POC1B/LCA5/ADAM8/TUB/CD34/SMO/BBS2/CSF1R/GPR137/TNFRSF11B/ATP6AP1/ILDR2/PDK4/MUC4/SNX10/CXADR/GATA2
GOBP_REGULATION_OF_PROTEIN_AUTOPHOSPHORYLATION	GOBP_REGULATION_OF_PROTEIN_AUTOPHOSPHORYLATION	40	0.652316	1.76155	0.000297715	0.00760166	0.00611727	1666	tags=30%, list=12%, signal=26%	CAV1/GREM1/PDGFC/ERRFI1/PTPRC/VEGFA/MOB1B/VEGFC/PPP2R5C/PDGFD/ENG/PPP2R5A
GOBP_RESPONSE_TO_CORTICOSTEROID	GOBP_RESPONSE_TO_CORTICOSTEROID	99	0.551221	1.63975	0.000315473	0.00798019	0.00642188	1930	tags=29%, list=14%, signal=25%	SGK1/ANXA1/IGFBP7/ERRFI1/ADM/CYBB/SERPINF1/DUSP1/UBE2L3/FOXO1/FBXO32/BCL2L11/PAPPA/SPARC/BCHE/STC1/NR3C1/RPS6KB1/PTAFR/FECH/IL6/KLF9/ENG/CASP3/COL1A1/CCND1/CLDN1/DDIT4/ZFP36L1
GOBP_POSITIVE_REGULATION_OF_PHOSPHATIDYLINOSITOL_3_KINASE_SIGNALING	GOBP_POSITIVE_REGULATION_OF_PHOSPHATIDYLINOSITOL_3_KINASE_SIGNALING	71	0.579972	1.68008	0.0003155	0.00798019	0.00642188	2086	tags=27%, list=15%, signal=23%	PDGFC/FN1/PDGFRB/F2R/TGFB2/FLT1/FGR/PDGFRA/PIK3AP1/SOX9/ANGPT1/PDGFD/IL18/IGF1R/ERBB3/GAB1/UNC5B/ERBB4/PIK3CA
GOBP_CELL_GROWTH	GOBP_CELL_GROWTH	349	0.441009	1.3695	0.000316707	0.00798019	0.00642188	3161	tags=29%, list=23%, signal=23%	SPOCK1/SGK1/SEMA3C/GREM1/DCBLD2/NIN/WNT5A/IGFBP7/FN1/IGFBP3/MAP1B/SPP1/NDUFS3/IGFBP5/TGFB2/NRP1/GJA1/NRP2/NDN/APBB2/SFRP1/ADAM17/SFRP2/S100A8/SEMA3D/SEMA5A/POSTN/CPNE5/SEMA3E/LAMB2/SEMA3F/VEGFA/KRT17/GNG4/OLFM1/SOX9/OSGIN2/CXCL16/SLC9A1/DBN1/WASF1/HNF4A/SERPINE2/TAF9B/ALCAM/PPP3CB/HSPA1B/MEX3C/RGS2/CRKL/PRKCQ/CDK5R1/GDI1/RGS4/LIMK1/CD38/BST2/PAK1/SEMA6D/ENO1/PDLIM5/RPS6KA3/BRAT1/WT1/HSP90AB1/EIF4…
GOBP_ENDOCYTOSIS	GOBP_ENDOCYTOSIS	430	0.429794	1.3407	0.000321264	0.00804481	0.00647388	2655	tags=28%, list=19%, signal=23%	CAV1/THBS1/STON1/GREM1/RAB31/WNT5A/SERPINE1/SSC5D/ADM/CLCN5/PTX3/ABCA7/MSR1/VLDLR/CDH13/SGIP1/MRC2/LGALS3/PRKD1/IGLL5/C3/CD36/C4B/INPPL1/EPHA3/PRG4/CD14/RAB7A/XKR9/SAA1/APLP1/AXL/VEGFA/LDLRAD3/CLEC7A/ITGB1/USP20/ANGPT1/SPARC/CXCL16/CLINT1/PLA2R1/TFRC/RHOJ/MIB1/CLTCL1/ARHGAP12/HOOK2/ANK2/ARHGAP25/NLGN2/WASF1/MYH9/SCARB1/ARF6/LOXL4/AMPH/MX1/MAPKAPK2/PPP3CB/B2M/HTR2B/ENPP2/LRP12/SLC9B2/SMAP1/AHI1/MF…
GOBP_REGULATION_OF_OSSIFICATION	GOBP_REGULATION_OF_OSSIFICATION	82	0.568601	1.65898	0.000322072	0.00804481	0.00647388	2231	tags=28%, list=16%, signal=24%	GREM1/WNT5A/DDR2/SRGN/TGFB2/S1PR1/SFRP1/ECM1/TGFB3/SOX9/PKDCC/WNT4/EGR2/INTU/BMPR1B/DHRS3/DKK1/ADRB2/ANKH/COMP/MEF2C/SLC8A1/CCR1
GOBP_NEGATIVE_REGULATION_OF_CELL_ADHESION	GOBP_NEGATIVE_REGULATION_OF_CELL_ADHESION	215	0.469852	1.44303	0.00033527	0.00830753	0.0066853	1753	tags=20%, list=13%, signal=18%	PHLDB2/SPOCK1/THBS1/ANXA1/SERPINE1/SNAI2/RDX/LGALS1/FZD4/LAPTM5/CDH13/ACER2/PLXNC1/LGALS3/PTPRC/DUSP1/CD164/TNC/APOD/CD80/SEMA5A/POSTN/FGL2/SEMA3E/VEGFA/TGFBI/ANGPT1/RASA1/PLXND1/TNFSF4/SERPINE2/PODXL/CEBPB/LRRC32/DLC1/IL20RB/PDCD1LG2/ERBB3/CASP3/PAWR/HLX/PELI1/COL1A1
GOBP_BIOMINERALIZATION	GOBP_BIOMINERALIZATION	108	0.533603	1.59738	0.000336428	0.00830753	0.0066853	2311	tags=30%, list=17%, signal=25%	GREM1/DDR2/SRGN/SPP1/FAM20A/S1PR1/ASPN/LGR4/FGR/SMPD3/FOXO1/ECM1/TGFB3/SOX9/PKDCC/PTHLH/WNT4/BMPR1B/NOS3/CEBPB/FGFR2/COL1A2/ADRB2/COL1A1/ANKH/COMP/MEF2C/GPC3/SLC8A1/CCR1/FBLN7/FAM20C
GOCC_ACTIN_FILAMENT	GOCC_ACTIN_FILAMENT	86	0.558662	1.64133	0.000336929	0.00830753	0.0066853	2761	tags=41%, list=20%, signal=33%	ANXA1/TPM2/PLS3/FLNA/PDLIM3/ACTG1/PALLD/SPECC1/GAS2L1/HCK/GAS7/TMOD1/DBN1/LCP1/GNG12/DPYSL3/SPECC1L/MYO5A/PAK1/MYO1C/PKD2/KEAP1/LMOD1/PAWR/PDLIM5/ARHGAP6/PLS1/ACTB/PDLIM2/POF1B/EHBP1/PDLIM7/MYO3A/DAPK3/SMTN
GOBP_FORMATION_OF_PRIMARY_GERM_LAYER	GOBP_FORMATION_OF_PRIMARY_GERM_LAYER	76	0.571685	1.6623	0.000344037	0.00842322	0.0067784	2748	tags=41%, list=20%, signal=33%	COL4A2/WNT5A/GATA6/FN1/GJA1/DUSP1/MMP2/SFRP2/MMP15/ITGB1/LAMB1/LEO1/SNAI1/PAF1/FGFR2/DKK1/HMGA2/MMP9/COL5A1/COL6A1/FOXC1/ITGA8/HSBP1/COL11A1/EXT2/COL7A1/ITGA7/PRKAR1A/COL12A1/MMP14/LAMA3
GOBP_MACROPHAGE_CYTOKINE_PRODUCTION	GOBP_MACROPHAGE_CYTOKINE_PRODUCTION	14	0.786063	1.76223	0.000344553	0.00842322	0.0067784	1840	tags=57%, list=13%, signal=50%	WNT5A/TGFB2/LAPTM5/CD36/TGFB3/GPRC5B/TLR4/IRAK3
GOBP_CELL_PART_MORPHOGENESIS	GOBP_CELL_PART_MORPHOGENESIS	498	0.418678	1.31063	0.000357719	0.00867612	0.00698191	3552	tags=33%, list=26%, signal=25%	FLRT2/ROBO1/SGK1/SEMA3C/NIN/WNT5A/FN1/MAP1B/SPP1/PTPRD/CHL1/CDH2/NRP1/FZD4/GJA1/NRP2/VLDLR/NDN/SDC2/LAMA2/PLXNC1/TPBG/PALLD/EPHB3/TRPC6/MAP1A/TCTN1/EPHA3/CRMP1/TUBB3/SEMA3D/LRRC4C/NOTCH3/NES/SEMA5A/POSTN/CPNE5/SEMA3E/LAMB2/NR4A2/SEMA3F/VEGFA/OLFM1/GAS7/PTPRM/LZTS1/PDPN/SHC3/KIF5C/PLXND1/EGR2/DBN1/ATP7A/DVL3/BMPR1B/PID1/WASF1/DTNBP1/ALCAM/PPP3CB/ENPP2/KALRN/ABI2/CHN1/CNTN4/PRKCQ/CDK5R1/GDI1/RELN/N…
GOBP_ENDODERM_FORMATION	GOBP_ENDODERM_FORMATION	38	0.664343	1.77754	0.000357918	0.00867612	0.00698191	2748	tags=55%, list=20%, signal=44%	COL4A2/GATA6/FN1/DUSP1/MMP2/MMP15/LAMB1/LEO1/PAF1/DKK1/HMGA2/MMP9/COL5A1/COL6A1/HSBP1/COL11A1/COL7A1/ITGA7/COL12A1/MMP14/LAMA3
GOBP_NEGATIVE_REGULATION_OF_REPRODUCTIVE_PROCESS	GOBP_NEGATIVE_REGULATION_OF_REPRODUCTIVE_PROCESS	31	0.671028	1.75471	0.000367777	0.00887765	0.00714409	1942	tags=42%, list=14%, signal=36%	WNT5A/ZFPM2/GJA1/SERPINF1/DUSP1/SULF1/PRKACB/WNT4/SNAI1/RAD1/LIF/WDR77/WT1
GOMF_CYTOKINE_BINDING	GOMF_CYTOKINE_BINDING	92	0.551578	1.63201	0.000372319	0.00894967	0.00720204	2723	tags=37%, list=20%, signal=30%	THBS1/GREM1/IL1R1/PXDN/LTBP1/NRP1/FZD4/A2M/NRP2/CCRL2/CD36/TGFB3/ITGB1/IL18R1/PDPN/KLHL20/LRRC32/IL20RB/CD109/VASN/CX3CR1/ENG/LIFR/IFNGR1/PRLR/CSF3R/COMP/ACVRL1/IL10RA/CCR1/IL6ST/CSF1R/CD4/TGFBR3
GOBP_NEGATIVE_REGULATION_OF_AXON_EXTENSION_INVOLVED_IN_AXON_GUIDANCE	GOBP_NEGATIVE_REGULATION_OF_AXON_EXTENSION_INVOLVED_IN_AXON_GUIDANCE	21	0.729396	1.76448	0.00037677	0.00901893	0.00725778	621	tags=33%, list=4%, signal=32%	SEMA3C/WNT5A/NRP1/SEMA3D/SEMA5A/SEMA3E/SEMA3F
GOBP_EPITHELIAL_TUBE_MORPHOGENESIS	GOBP_EPITHELIAL_TUBE_MORPHOGENESIS	240	0.467519	1.4408	0.000386218	0.00920673	0.00740891	3287	tags=35%, list=24%, signal=27%	GREM1/WNT5A/ADM/TGFB2/NRP1/COL4A1/PGR/TCTN1/ESR1/SFRP1/SFRP2/PKHD1/LGR4/EDNRA/TNC/SEMA3E/VEGFA/SPRY1/SOX9/PRKACB/LGR5/PLXND1/WNT4/MTHFR/MIB1/KAT2A/DVL3/AR/ADAMTS16/PODXL/DLC1/AHI1/SHROOM3/FGF1/PHACTR4/ENG/SEC24B/FGFR2/PAK1/CASP3/MTHFD1L/PKD2/CLIC4/CSNK2B/RNF207/PTK7/CELSR1/ITGAX/CCL11/HES1/WT1/CCM2/MET/MEF2C/GPC3/ACVRL1/SOX4/CCDC39/NDRG4/GATA4/SMO/STK3/CSF1R/LMO4/NOTCH2/FZD3/AGT/MMP14/CCDC40/ESRP…
GOBP_CELLULAR_RESPONSE_TO_ORGANIC_CYCLIC_COMPOUND	GOBP_CELLULAR_RESPONSE_TO_ORGANIC_CYCLIC_COMPOUND	386	0.43537	1.35332	0.000389617	0.00923229	0.00742948	2652	tags=27%, list=19%, signal=22%	PDE3A/CAV1/SGK1/ANXA1/PAQR8/ERRFI1/SPP1/GNAI1/SNAI2/IGFBP5/LGALS1/FLNA/PGR/MN1/NCOA4/LCOR/HEYL/SERPINF1/NR4A3/ESR1/SFRP1/AACS/UBE2L3/TNC/FOXO1/FBXO32/APLP1/BCL2L11/KAT5/PDE4B/STRN3/MSN/SOD1/RIOK3/NOX4/ANKRD1/PER1/SLC9A1/HSPA5/GNG2/MBD2/STC1/NR3C1/AR/RPS6KB1/HDAC1/PTAFR/DTNBP1/GNAS/HTR2B/CEBPB/CYP7B1/FECH/KLF9/IFIH1/IL18/SLC16A1/AKAP9/ELK1/RGS4/KLF2/PAK1/PGRMC2/CASP3/DAB2/PKD2/CASP7/ITPR2/HDAC2/CO…
GOCC_PLATELET_ALPHA_GRANULE_LUMEN	GOCC_PLATELET_ALPHA_GRANULE_LUMEN	46	0.62924	1.72031	0.000392083	0.00923229	0.00742948	804	tags=26%, list=6%, signal=25%	THBS1/SRGN/FN1/SERPINE1/VWF/TGFB2/A2M/ISLR/TGFB3/VEGFA/SPARC/VEGFC
GOBP_CELL_CELL_JUNCTION_ASSEMBLY	GOBP_CELL_CELL_JUNCTION_ASSEMBLY	108	0.531142	1.59002	0.000392111	0.00923229	0.00742948	2780	tags=30%, list=20%, signal=24%	CAV1/CDH5/PECAM1/GJC1/HEG1/SNAI2/CLDN18/CDH2/OCLN/GJA1/ACTG1/GJA5/GNPAT/PRKCI/SNAI1/MYO1C/UGT8/CLDN1/PKP4/MARVELD2/PRKCH/APC/PKP3/ACTB/POF1B/ACE2/CDH11/CLDN2/PTPRO/CLDN11/AGT/PARD6B
GOBP_ESTABLISHMENT_OF_PLANAR_POLARITY_OF_EMBRYONIC_EPITHELIUM	GOBP_ESTABLISHMENT_OF_PLANAR_POLARITY_OF_EMBRYONIC_EPITHELIUM	13	0.804222	1.79314	0.000394393	0.00924811	0.0074422	2113	tags=62%, list=15%, signal=52%	WNT5A/SFRP1/SFRP2/DVL3/SEC24B/PTK7/CELSR1/FOXF2
GOBP_GRANULOCYTE_CHEMOTAXIS	GOBP_GRANULOCYTE_CHEMOTAXIS	81	0.55953	1.63198	0.000398414	0.00930443	0.00748753	2255	tags=31%, list=16%, signal=26%	THBS1/CXCL6/RARRES2/ANXA1/SCG2/TGFB2/LGALS3/MCU/S100A8/SAA1/PDE4B/C3AR1/PREX1/CXCL1/BST1/CCL18/CAMK1D/CCL22/CXCL11/CCL11/SRP54/CSF3R/ITGA1/FCER1G/CCL2
GOMF_INTEGRIN_BINDING	GOMF_INTEGRIN_BINDING	114	0.531219	1.59777	0.000400171	0.00930761	0.00749009	1855	tags=25%, list=13%, signal=22%	THBS1/TSPAN8/FN1/EDIL3/FAP/SPP1/FERMT2/VWF/FBLN5/ADAM17/SFRP2/COL4A3/LAMB2/ITGB1/TGFBI/ECM2/LAMB1/ITGBL1/LCP1/MYH9/NRG1/DST/ADAMTS5/MFGE8/FGF1/S1PR3/ITGAX/COL5A1/FBN1
GOBP_ARTERY_MORPHOGENESIS	GOBP_ARTERY_MORPHOGENESIS	51	0.614604	1.70736	0.00041124	0.00952651	0.00766624	2169	tags=37%, list=16%, signal=32%	MYLK/PDGFRB/AKT3/TGFB2/NRP1/GJA5/STRA6/FKBP10/VEGFA/ADAMTS9/PRRX1/ENG/SEC24B/PKD2/FOXC1/HES1/COMP/ACVRL1/SOX4
GOBP_ENDODERMAL_CELL_DIFFERENTIATION	GOBP_ENDODERMAL_CELL_DIFFERENTIATION	33	0.670834	1.74938	0.000431492	0.00991717	0.00798062	2748	tags=61%, list=20%, signal=49%	COL4A2/GATA6/FN1/MMP2/MMP15/LAMB1/LEO1/PAF1/DKK1/HMGA2/MMP9/COL5A1/COL6A1/HSBP1/COL11A1/COL7A1/ITGA7/COL12A1/MMP14/LAMA3
GOBP_MUSCLE_CELL_MIGRATION	GOBP_MUSCLE_CELL_MIGRATION	72	0.57632	1.67221	0.000431557	0.00991717	0.00798062	1324	tags=26%, list=10%, signal=24%	ANXA1/SERPINE1/IGFBP3/PDGFRB/IGFBP5/NRP1/PLAU/DOCK4/ADAMTS1/NR4A3/LPAR1/ARPC5/POSTN/PLAT/NOX4/ATP7A/RPS6KB1/PDGFD/HAS2
GOBP_GLAND_DEVELOPMENT	GOBP_GLAND_DEVELOPMENT	314	0.45533	1.41018	0.000435186	0.00995103	0.00800786	2947	tags=32%, list=21%, signal=25%	CAV1/ROBO1/SEMA3C/WNT5A/GATA6/ANXA1/IGFBP5/TGFB2/ETS1/PGR/ALDH1A3/EPHB3/PITX1/MAFB/SERPINF1/TGM2/CITED2/ESR1/SFRP1/AACS/TNC/STRA6/PDGFRA/HMOX1/TGFB3/DKK3/SULF1/VEGFA/BCL2L11/MSN/OXTR/SOX9/SOD1/PLXND1/WNT4/CCNB2/ATP7A/HNF4A/SERPINE2/ARF6/AR/GLI1/CEBPB/CYP7B1/IL6/NRG1/FSTL3/KALRN/CSNK2A2/E2F7/CRKL/FGF1/FGFR2/WDR77/ARID5B/FEM1B/PKD2/HLX/PRLR/CREB1/CCND1/FOXC1/CLDN1/CCL11/DUT/HES1/WT1/ARHGAP5/PYGO2/E…
GOBP_SENSORY_SYSTEM_DEVELOPMENT	GOBP_SENSORY_SYSTEM_DEVELOPMENT	233	0.470849	1.44938	0.000436494	0.00995103	0.00800786	2314	tags=24%, list=17%, signal=21%	VIM/EFEMP1/WNT5A/PDGFRB/TGFB2/NRP1/COL4A1/NKD1/FZD4/ALDH1A3/RARB/FLT1/HIPK2/CDON/SERPINF1/SALL2/C3/DIO3/FJX1/USH1C/STRA6/PDGFRA/NES/LAMB2/VEGFA/SPRY1/SOX9/PTPRM/TMOD1/SIX5/SH3PXD2B/RHOJ/NAGLU/PRKCI/BMPR1B/HDAC1/MERTK/RRM1/ABI2/LPCAT1/AHI1/PHACTR4/CLIC4/HDAC2/COL5A1/FOXC1/FBN1/WT1/PYGO2/FOXF2/SLC44A4/ACVRL1/TUB/MEIS2/PBX3/SEMA3A/LIMK2
GOBP_NEGATIVE_REGULATION_OF_VASCULAR_PERMEABILITY	GOBP_NEGATIVE_REGULATION_OF_VASCULAR_PERMEABILITY	14	0.781142	1.7512	0.000442123	0.0100268	0.00806884	755	tags=43%, list=5%, signal=41%	PDE3A/ADM/FERMT2/AKAP12/VEGFA/ANGPT1
GOBP_NEUROEPITHELIAL_CELL_DIFFERENTIATION	GOBP_NEUROEPITHELIAL_CELL_DIFFERENTIATION	13	0.801198	1.7864	0.000443309	0.0100268	0.00806884	2311	tags=62%, list=17%, signal=51%	SERPINE1/CDH2/BCCIP/WNT4/CEBPB/HES1/SOX4/FAM20C
GOBP_RESPONSE_TO_PLATELET_DERIVED_GROWTH_FACTOR	GOBP_RESPONSE_TO_PLATELET_DERIVED_GROWTH_FACTOR	16	0.775919	1.79017	0.000455554	0.0102634	0.0082592	1792	tags=50%, list=13%, signal=44%	ERRFI1/RDX/PDGFRB/ATP7A/PDGFD/HAS2/FER/CREB1
GOBP_OSTEOBLAST_DIFFERENTIATION	GOBP_OSTEOBLAST_DIFFERENTIATION	159	0.49265	1.4992	0.000457989	0.0102779	0.00827092	3071	tags=33%, list=22%, signal=26%	GREM1/DDR2/IGFBP3/SPP1/SNAI2/FERMT2/IGFBP5/MRC2/PRKD1/SFRP1/SFRP2/LGR4/TNC/RUNX2/BCAP29/SOX9/VEGFC/WWTR1/FZD1/PTHLH/WNT4/SNAI1/BMPR1B/GLI1/GNAS/WWOX/CEBPB/IL6/SYNCRIP/CLTC/FGFR2/BAMBI/COL1A1/UFL1/CREB3L1/COL6A1/ASF1A/SHOX2/MEF2C/SMO/IL6ST/ID3/PDLIM7/ADAR/SNRNP200/TP63/ATP6AP1/NBR1/ACVR2A/SEMA4D/LOX/FHL2
GOBP_UTERUS_DEVELOPMENT	GOBP_UTERUS_DEVELOPMENT	13	0.800437	1.7847	0.000461652	0.0103198	0.00830464	491	tags=31%, list=4%, signal=30%	WNT5A/TGFB2/ESR1/STRA6
GOBP_ESTABLISHMENT_OF_PLANAR_POLARITY_INVOLVED_IN_NEURAL_TUBE_CLOSURE	GOBP_ESTABLISHMENT_OF_PLANAR_POLARITY_INVOLVED_IN_NEURAL_TUBE_CLOSURE	11	0.82521	1.7604	0.00046372	0.0103259	0.0083095	1729	tags=55%, list=12%, signal=48%	WNT5A/SFRP1/SFRP2/DVL3/SEC24B/PTK7
GOBP_CARDIAC_VENTRICLE_MORPHOGENESIS	GOBP_CARDIAC_VENTRICLE_MORPHOGENESIS	48	0.619203	1.70845	0.000468819	0.0103991	0.00836843	2947	tags=40%, list=21%, signal=31%	CPE/SEMA3C/HEG1/ZFPM2/TGFB2/HEYL/SFRP2/NRG1/ENG/FGFR2/MIR17HG/FOXC1/MEF2C/COL11A1/SOX4/GATA4/TGFBR3/HIF1A/FOXF1
GOBP_CELLULAR_RESPONSE_TO_VASCULAR_ENDOTHELIAL_GROWTH_FACTOR_STIMULUS	GOBP_CELLULAR_RESPONSE_TO_VASCULAR_ENDOTHELIAL_GROWTH_FACTOR_STIMULUS	53	0.608085	1.69438	0.000474213	0.0104767	0.00843089	2175	tags=32%, list=16%, signal=27%	ROBO1/ANXA1/GAS1/PDGFRB/NRP1/NRP2/FLT1/PRKD1/PDGFRA/VEGFA/VEGFC/MAPKAPK2/MYO1C/GAB1/FOXC1/PIK3CA/ADAMTS3
GOMF_CYTOKINE_RECEPTOR_BINDING	GOMF_CYTOKINE_RECEPTOR_BINDING	150	0.504515	1.53353	0.000475965	0.0104767	0.00843089	1854	tags=25%, list=13%, signal=22%	CDH5/CXCL6/GREM1/PXDN/FERMT2/TGFB2/CCRL2/ADAM17/ECM1/TGFB3/NES/VEGFA/TFF2/TNFSF12/DEFB1/CXCL16/VEGFC/CTF1/TNFSF4/LIF/CXCL1/IL6/CCL18/IL18/TRAF1/ENG/CCL22/IL33/LIFR/FEM1B/CASP3/SHC1/BAMBI/PRLR/CXCL11/CCL11/TOLLIP
GOCC_PLATELET_ALPHA_GRANULE	GOCC_PLATELET_ALPHA_GRANULE	66	0.575098	1.65145	0.000477985	0.010481	0.00843435	1480	tags=26%, list=11%, signal=23%	THBS1/PECAM1/SRGN/FN1/SERPINE1/VWF/TGFB2/A2M/ISLR/CD36/TGFB3/VEGFA/SPARC/VEGFC/SERPINE2/CD109/F8
GOBP_RESPONSE_TO_PEPTIDE	GOBP_RESPONSE_TO_PEPTIDE	373	0.435128	1.35199	0.000490003	0.0106442	0.00856565	2086	tags=22%, list=15%, signal=19%	CAV1/VIM/RAB31/RARRES2/ANXA1/ERRFI1/MAP1B/GNAI1/ADM/IGFBP5/CYBB/GJA1/ZDHHC7/SERPINF1/TFF1/NR4A3/CD36/INPPL1/MMP2/SMPD3/FOXO1/GNAI2/ATP6V1E1/NR4A2/BCL2L11/PRKAA1/SLC39A14/TLR6/OXTR/SPARC/CD40/BTG2/PRKACB/SLC9A1/KLF3/EGR2/PRKCI/SLC2A8/PID1/RPS6KB1/PHIP/LGMN/STAT4/RAB12/ATP6V0B/NCOA5/CA2/MYO5A/TLR4/MDM2/IGF1R/PRKCQ/ATP6V0A2/EREG/KLF2/PDPK1/PAK1/LEPROT/MYO1C/SHC1/NFKBIA/ADRB2/TIMP4/MMP9/GAB1/GCNT1/CO…
GOBP_CELLULAR_RESPONSE_TO_CORTICOSTEROID_STIMULUS	GOBP_CELLULAR_RESPONSE_TO_CORTICOSTEROID_STIMULUS	41	0.637548	1.73385	0.000490013	0.0106442	0.00856565	1252	tags=32%, list=9%, signal=29%	SGK1/ANXA1/ERRFI1/SERPINF1/UBE2L3/FOXO1/FBXO32/BCL2L11/STC1/NR3C1/RPS6KB1/FECH/KLF9
GOBP_NEGATIVE_REGULATION_OF_GROWTH	GOBP_NEGATIVE_REGULATION_OF_GROWTH	181	0.476693	1.45999	0.000490984	0.0106442	0.00856565	3161	tags=34%, list=23%, signal=27%	MT2A/SEMA3C/GREM1/DCBLD2/WNT5A/SPP1/NDUFS3/IGFBP5/TGFB2/NRP1/NKD1/GJA1/APBB2/SFRP1/SFRP2/SEMA3D/SEMA5A/SEMA3E/SEMA3F/GNG4/OSGIN2/HNF4A/SERPINE2/WWC2/LGMN/HSPA1B/RGS2/CDK5R1/RGS4/BST2/MIR17HG/PAK1/ADRB2/SEMA6D/ENO1/PLAC8/WT1/CAPRIN2/GPC3/BCL6/ACVRL1/ACVR1B/CRLF3/SEMA3A/DDX3X/STK3/BBS2/DCUN1D3/HSPA1A/NOTCH2/RTN4/MT1E/PTK6/HIF1A/SLIT2/CRYAB/VGLL4/SEMA4D/SIPA1/HYAL1/PPT1/NTN1
GOBP_COLLAGEN_FIBRIL_ORGANIZATION	GOBP_COLLAGEN_FIBRIL_ORGANIZATION	42	0.633304	1.71976	0.000498592	0.0107599	0.0086588	2573	tags=52%, list=19%, signal=43%	ADAMTS2/GREM1/DDR2/PXDN/TGFB2/COL14A1/SERPINH1/SFRP2/FKBP10/AEBP1/ATP7A/LOXL4/COL1A2/COL1A1/COL5A1/FOXC1/COMP/COL11A1/ADAMTS3/DPT/COL3A1/COL12A1
GOBP_NEGATIVE_REGULATION_OF_COAGULATION	GOBP_NEGATIVE_REGULATION_OF_COAGULATION	31	0.666307	1.74237	0.000500069	0.0107599	0.0086588	1173	tags=29%, list=8%, signal=27%	THBS1/TSPAN8/SERPINE1/FAP/PLAU/PDGFRA/PLAT/SERPINE2/NOS3
GOBP_REACTIVE_OXYGEN_SPECIES_METABOLIC_PROCESS	GOBP_REACTIVE_OXYGEN_SPECIES_METABOLIC_PROCESS	196	0.481733	1.47743	0.000510873	0.0109358	0.0088003	3014	tags=29%, list=22%, signal=23%	CAV1/THBS1/PXDN/PTGS2/GPX3/NDUFS3/PDGFRB/CYBB/SOD2/PTX3/PMAIP1/FBLN5/PRCP/H19/TYROBP/CD36/NQO1/GNAI2/CLEC7A/TLR6/SOD1/NOX4/PLA2R1/SH3PXD2B/ATP7A/PREX1/PID1/NOS3/NCF2/BST1/TLR4/VDAC1/BCO2/CX3CR1/KLF2/PKD2/MPV17/DDIT4/IFI6/HSP90AB1/RORA/CYB5R3/GPX1/CD34/ACE2/SPR/ATG5/AGT/BNIP3/BRCA1/DDAH1/GLS2/HIF1A/PDK4/CRYAB/NOS1AP
GOBP_MEMORY	GOBP_MEMORY	66	0.573302	1.64629	0.000512048	0.0109358	0.0088003	1792	tags=32%, list=13%, signal=28%	SGK1/ABCA7/VLDLR/MAP1A/SERPINF1/RASGRF1/OXTR/KAT2A/CPEB3/PAIP2/RPS6KB1/LGMN/PPP3CB/CEBPB/KALRN/SYT11/CAMK4/PPP1R1B/CX3CR1/CRTC1/CREB1
GOBP_REGULATION_OF_TRANSMEMBRANE_TRANSPORT	GOBP_REGULATION_OF_TRANSMEMBRANE_TRANSPORT	330	0.440237	1.36583	0.000517479	0.0110108	0.0088607	3288	tags=33%, list=24%, signal=26%	CAV1/THBS1/KCNE3/F2R/CYBB/FLNA/OCLN/KCND2/GJA1/CTSS/LRRC55/TRPC6/SLC30A5/C3/NR4A3/RASGRF1/EDNRA/PEA15/STAC/TRPC1/WWP2/CACNA1H/PDE4B/KCNQ3/ITGB1/GRIA3/ACSL5/GEM/SCN7A/FXYD6/ATP1B1/ARL6IP5/SLC9A1/CLTCL1/PRKCI/ATP7A/ANK2/PID1/NLGN2/RPS6KB1/PTAFR/CA2/AHNAK/YWHAE/RGS2/VDAC1/STOM/AKAP9/PSEN2/RGS4/RELN/KCNMA1/CLIC2/FMR1/PDPK1/ABCB1/KCNJ8/PKD2/ADRB2/CLIC4/RNF207/MMP9/KCNS3/KCND1/CXCL11/KCNAB2/KCNMB1/MEF2…
GOBP_POSITIVE_REGULATION_OF_CELL_DEVELOPMENT	GOBP_POSITIVE_REGULATION_OF_CELL_DEVELOPMENT	213	0.474404	1.45732	0.000526638	0.0111233	0.00895122	3388	tags=38%, list=24%, signal=29%	PDE3A/ROBO1/CDH5/NIN/FN1/MAP1B/PTPRD/FERMT2/FLNA/NRP1/PLXNC1/SERPINF1/TYROBP/MME/SEMA5A/VEGFA/CLEC7A/VEGFC/LIMS1/PLXND1/EGR2/DBN1/PRKCI/PREX1/SERPINE2/HDAC1/SRRT/LIF/IL6/KALRN/SLC9B2/HAS2/NAP1L1/CRKL/GDI1/RELN/NUMBL/CX3CR1/MPL/CUX1/LIMK1/PAK1/HDAC2/UFL1/HES1/MYB/PRKCH/CAPRIN2/SHOX2/PARP6/ILK/CDC42/TIAM1/FBXO31/SMO/IL6ST/BIN1/OLFM4/DHX36/BDNF/TIAM2/CRK/FZD3/RFX3/ATP6AP1/HIF1A/SLIT2/TRIB1/CUL7/KIT/…
GOBP_REGULATION_OF_SUPRAMOLECULAR_FIBER_ORGANIZATION	GOBP_REGULATION_OF_SUPRAMOLECULAR_FIBER_ORGANIZATION	282	0.45396	1.40263	0.000526638	0.0111233	0.00895122	2152	tags=25%, list=15%, signal=22%	PHLDB2/CDH5/NIN/MAP1B/FERMT2/RDX/ADD3/FLNA/NRP1/IQGAP2/OCLN/ACTG1/CFL2/S1PR1/CDC42EP5/PFN2/TTBK2/PFN1/MAP1A/STMN2/SFRP1/LPAR1/ARPC5/CLIP1/TGFB3/ARHGEF5/SEMA5A/NAV3/HCK/AEBP1/TMOD1/RASA1/NOX4/SLC9A1/ELN/WNT4/DBN1/PREX1/WASF1/ARF6/DLC1/CLASP1/LIMA1/HSPA1B/ABI2/TMOD3/CDK5R1/AKAP9/SORBS3/RGS4/GPR65/KANK4/LIMK1/VILL/PAK1/MYO1C/SSH3/LMOD1/ARFIP2/FER/CCL11/EPS8/ALMS1/ARHGAP6/HSPA8/MET/FHOD3/APC/PIK3CA/C…
GOBP_DETOXIFICATION	GOBP_DETOXIFICATION	84	0.556944	1.62503	0.000532248	0.0112006	0.00901343	2728	tags=36%, list=20%, signal=29%	MT2A/PXDN/PTGS2/GPX3/SOD2/MGST3/FBLN5/PTGES/H19/CD36/NQO1/SLC15A2/SOD1/ATP7A/NOS3/MGST1/GPX2/GPX4/CLIC2/GSTK1/GPX7/AKR1A1/GSTO2/GPX1/GSTM2/GSTA1/RALBP1/ALOX5AP/TXNRD2/MT1E
GOBP_POSITIVE_REGULATION_OF_SMOOTH_MUSCLE_CELL_MIGRATION	GOBP_POSITIVE_REGULATION_OF_SMOOTH_MUSCLE_CELL_MIGRATION	34	0.655177	1.71722	0.000534299	0.0112027	0.00901514	1777	tags=44%, list=13%, signal=39%	PDGFRB/IGFBP5/NRP1/DOCK4/ADAMTS1/NR4A3/LPAR1/POSTN/NOX4/ATP7A/RPS6KB1/PDGFD/HAS2/PAK1/SEMA6D
GOBP_SKIN_DEVELOPMENT	GOBP_SKIN_DEVELOPMENT	183	0.479681	1.46872	0.000537407	0.0112269	0.00903462	2228	tags=28%, list=16%, signal=24%	ADAMTS2/WNT5A/APCDD1/GATA6/ANXA1/ERRFI1/IGFBP5/TGFB2/PALLD/LGR4/DSC3/KRT23/KRT17/FST/SPINK5/ABCA12/SOX9/FLG/LGR5/INTU/ATP7A/SNAI1/HDAC1/GNAS/LDB2/ZBED2/KRT7/CD109/EREG/FGFR2/PIP5K1A/GRHL1/CASP3/COL1A2/CLIC4/HDAC2/COL1A1/COL5A1/FOXC1/CLDN1/PKP4/ZFP36L1/AQP3/FRAS1/PRKCH/MET/COMP/NOM1/PKP3/SCEL/ACVR1B
GOBP_CELL_MIGRATION_INVOLVED_IN_HEART_DEVELOPMENT	GOBP_CELL_MIGRATION_INVOLVED_IN_HEART_DEVELOPMENT	12	0.815251	1.78242	0.000540505	0.0112507	0.00905376	135	tags=33%, list=1%, signal=33%	BVES/SEMA3C/SNAI2/PDGFRB
GOBP_REGULATION_OF_CELL_DEVELOPMENT	GOBP_REGULATION_OF_CELL_DEVELOPMENT	346	0.43891	1.36325	0.000544955	0.0113024	0.00909536	3037	tags=30%, list=22%, signal=24%	PDE3A/ROBO1/SEMA3C/CDH5/NIN/WNT5A/FN1/MAP1B/SPP1/PTPRD/HOOK3/FERMT2/CLDN18/FLNA/NRP1/PLXNC1/HEYL/TRPC6/SERPINF1/TYROBP/DIO3/DAAM2/SEMA3D/MME/SEMA5A/POSTN/SEMA3E/SEMA3F/VEGFA/TRIM11/CLEC7A/VEGFC/LIMS1/PTHLH/PLXND1/EGR2/DBN1/PRKCI/PREX1/TMEM98/SERPINE2/HDAC1/SRRT/B2M/LIF/IL6/KALRN/SLC9B2/HAS2/NAP1L1/CRKL/CDK5R1/GDI1/S1PR3/RELN/NUMBL/CX3CR1/MPL/CUX1/LIMK1/PAK1/HDAC2/UFL1/SEMA6D/CCL11/FBN1/HES1/EFNB3…
GOBP_REGULATION_OF_PHOSPHATIDYLINOSITOL_3_KINASE_SIGNALING	GOBP_REGULATION_OF_PHOSPHATIDYLINOSITOL_3_KINASE_SIGNALING	100	0.538677	1.60152	0.000549521	0.0113561	0.00913857	2149	tags=26%, list=15%, signal=22%	PDGFC/PTPN13/FN1/PIP5K1B/PDGFRB/F2R/TGFB2/FLT1/FGR/PDGFRA/PIK3AP1/SOX9/ANGPT1/PPP2R5C/SERPINE2/NLRC3/PDGFD/IL18/IGF1R/PIP5K1A/ERBB3/GAB1/UNC5B/ERBB4/PIK3CA/PIK3IP1
GOBP_POSITIVE_REGULATION_OF_MYELOID_LEUKOCYTE_CYTOKINE_PRODUCTION_INVOLVED_IN_IMMUNE_RESPONSE	GOBP_POSITIVE_REGULATION_OF_MYELOID_LEUKOCYTE_CYTOKINE_PRODUCTION_INVOLVED_IN_IMMUNE_RESPONSE	15	0.765597	1.7412	0.000552084	0.0113682	0.00914828	1386	tags=40%, list=10%, signal=36%	WNT5A/LAPTM5/NR4A3/CD36/GPRC5B/TLR4
GOBP_REGULATION_OF_EPITHELIAL_CELL_APOPTOTIC_PROCESS	GOBP_REGULATION_OF_EPITHELIAL_CELL_APOPTOTIC_PROCESS	61	0.592835	1.69015	0.000558186	0.0114528	0.00921637	1574	tags=30%, list=11%, signal=26%	THBS1/CDH5/SCG2/SERPINE1/CD248/NUPR1/H19/PKHD1/HMOX1/SEMA5A/ANGPT1/CD40/PLA2R1/PRKCI/PDCD4/IL6/NDNF/PDPK1
GOBP_CYTOKINE_PRODUCTION_INVOLVED_IN_IMMUNE_RESPONSE	GOBP_CYTOKINE_PRODUCTION_INVOLVED_IN_IMMUNE_RESPONSE	72	0.572087	1.65993	0.000576639	0.0117893	0.00948716	2139	tags=32%, list=15%, signal=27%	IL1R1/WNT5A/TGFB2/LAPTM5/NR4A3/CD36/HMOX1/TGFB3/CLEC7A/ANGPT1/IL18R1/SASH3/TNFSF4/B2M/IL6/GPRC5B/IL18/TLR4/BST2/IRAK3/NLRP3/RSAD2/BCL6
GOBP_METANEPHROS_MORPHOGENESIS	GOBP_METANEPHROS_MORPHOGENESIS	20	0.725818	1.75753	0.00058946	0.0120044	0.00966027	2359	tags=60%, list=17%, signal=50%	GREM1/BASP1/PDGFRB/LGR4/SOX9/WNT4/LIF/PKD2/HES1/WT1/FRAS1/SMO
GOBP_REGULATION_OF_CELL_MORPHOGENESIS	GOBP_REGULATION_OF_CELL_MORPHOGENESIS	251	0.454149	1.4002	0.00059134	0.0120044	0.00966027	3586	tags=37%, list=26%, signal=28%	BVES/WNT5A/ANXA1/FN1/PTPRD/FERMT2/RDX/FLNA/NRP1/FZD4/PLXNC1/CDC42EP5/RHOBTB3/LPAR1/FGR/POSTN/CPNE5/SEMA3E/VEGFA/HCK/MSN/SPARC/ATP10A/PDPN/RASA1/LIMS1/RHOJ/PLXND1/DBN1/MYO10/PREX1/DVL3/MYH9/ZNF135/PHIP/DLC1/ENPP2/KALRN/HAS2/SHROOM3/CRKL/PARVB/RELN/MPL/CUX1/BAMBI/CCL11/FBLIM1/EPS8/P2RY1/CAPRIN2/PARP6/ILK/CDC42/ITGA7/TIAM1/ZMYM4/SYT17/CCL2/FBXO31/PALMD/CSF1R/OLFM4/RHOBTB2/DHX36/CRK/DAPK3/FGD1/ARAP1/…
GOBP_REGULATION_OF_CELL_SHAPE	GOBP_REGULATION_OF_CELL_SHAPE	130	0.506375	1.52925	0.000598522	0.0121074	0.00974318	3287	tags=38%, list=24%, signal=29%	BVES/ANXA1/FN1/FERMT2/RDX/PLXNC1/CDC42EP5/RHOBTB3/LPAR1/FGR/SEMA3E/VEGFA/HCK/MSN/ATP10A/PDPN/RASA1/RHOJ/PLXND1/MYO10/MYH9/PHIP/DLC1/SHROOM3/PARVB/BAMBI/CCL11/FBLIM1/EPS8/P2RY1/ITGA7/CCL2/PALMD/CSF1R/RHOBTB2/CRK/DAPK3/FGD1/ARAP1/FMNL3/KIT/CDC42EP3/ALDOA/SEMA4D/RHOQ/FAM171A1/PLXNA2/PLXNB2/DAG1
GOBP_VASOCONSTRICTION	GOBP_VASOCONSTRICTION	45	0.62126	1.70002	0.000603299	0.0121612	0.00978647	2700	tags=47%, list=19%, signal=38%	CAV1/ADM/F2R/GJA1/DOCK4/GJA5/EDNRA/ACTA2/OXTR/PTAFR/HTR2B/CD38/KCNMB2/COMP/EDNRB/SLC8A1/AVPR1A/ACE2/BBS2/KCNMB4/AGT
GOBP_PLATELET_ACTIVATION	GOBP_PLATELET_ACTIVATION	121	0.521039	1.57203	0.000608417	0.0121919	0.00981119	2619	tags=38%, list=19%, signal=31%	FN1/VWF/F2R/FLNA/DGKG/ACTG1/TRPC6/F2RL2/LCK/TEC/DGKI/PDGFRA/SAA1/AXL/CD40/PDPN/GNG2/MYH9/SERPINE2/PLSCR1/GNAS/NOS3/MERTK/IL6/TLR4/PRKCQ/LCP2/MPL/PDPK1/GNA12/COL1A2/ITPR2/COL1A1/P2RY1/PRKCH/COMP/PIK3CA/ILK/ACTB/FCER1G/ARRB1/GNA11/DGKZ/RAF1/COL3A1/PEAR1
GOBP_CELL_MORPHOGENESIS_INVOLVED_IN_NEURON_DIFFERENTIATION	GOBP_CELL_MORPHOGENESIS_INVOLVED_IN_NEURON_DIFFERENTIATION	428	0.417931	1.30362	0.000609066	0.0121919	0.00981119	3552	tags=34%, list=26%, signal=26%	FLRT2/ROBO1/SEMA3C/NIN/WNT5A/FN1/MAP1B/SPP1/PTPRD/CHL1/CDH2/NRP1/NRP2/VLDLR/NDN/SDC2/LAMA2/PLXNC1/TPBG/PALLD/EPHB3/TRPC6/MAP1A/TCTN1/EPHA3/CRMP1/TUBB3/SEMA3D/LRRC4C/NOTCH3/SEMA5A/SEMA3E/LAMB2/NR4A2/SEMA3F/VEGFA/OLFM1/PTPRM/LZTS1/SHC3/SOD1/KIF5C/PLXND1/EGR2/DBN1/BMPR1B/DTNBP1/ALCAM/PPP3CB/KALRN/ABI2/CHN1/CNTN4/PRKCQ/CDK5R1/GDI1/RELN/NUMBL/B4GALT6/SEC24B/FGFR2/CUX1/LIMK1/PAK1/SHC1/SLITRK4/GAB1/SEMA…
GOBP_CELL_MATRIX_ADHESION	GOBP_CELL_MATRIX_ADHESION	186	0.480759	1.47164	0.000612124	0.0122106	0.0098262	2364	tags=27%, list=17%, signal=23%	PHLDB2/THBS1/GREM1/FN1/SERPINE1/FERMT2/NRP1/PLAU/TMEM8B/FBLN5/NID2/ACTG1/CDH13/ACER2/CD36/SFRP1/EPHA3/PKHD1/APOD/POSTN/SEMA3E/VEGFA/BCL2L11/ITGB1/ECM2/NID1/RASA1/ADAMTS9/LIMS1/ITGBL1/SLC9A1/WNT4/SGCE/DLC1/CLASP1/BST1/PDPK1/PIP5K1A/ITGA8/ARHGAP6/ILK/ITGA1/BCL6/PTPRK/ACVRL1/ITGA7/TIAM1/RRAS/CD34/FREM1
GOBP_REGULATION_OF_BMP_SIGNALING_PATHWAY	GOBP_REGULATION_OF_BMP_SIGNALING_PATHWAY	60	0.597451	1.70144	0.000616133	0.012248	0.00985634	2625	tags=37%, list=19%, signal=30%	CDH5/GREM1/FSTL1/WNT5A/HTRA1/ZNF423/HIPK2/SFRP1/SFRP2/SULF1/FST/FSTL3/HTRA3/ENG/BAMBI/FBN1/HES1/GPC3/ACVRL1/GATA4/FKBP8/NOTCH2
GOMF_G_PROTEIN_BETA_SUBUNIT_BINDING	GOMF_G_PROTEIN_BETA_SUBUNIT_BINDING	13	0.794891	1.77233	0.00062063	0.0122949	0.00989403	1136	tags=46%, list=8%, signal=42%	F2R/GNG11/GNG7/GNG4/GNG2/GNG12
GOBP_PEPTIDE_CROSS_LINKING	GOBP_PEPTIDE_CROSS_LINKING	19	0.747831	1.79456	0.000623244	0.0123043	0.00990157	1419	tags=47%, list=10%, signal=43%	THBS1/ANXA1/FN1/ABCA7/TGM2/BGN/FLG/SPOCK2/NDNF
GOBP_ARTERY_DEVELOPMENT	GOBP_ARTERY_DEVELOPMENT	73	0.574488	1.66787	0.000625756	0.0123115	0.00990743	2169	tags=30%, list=16%, signal=26%	ROBO1/MYLK/PDGFRB/AKT3/TGFB2/NRP1/GJA5/STRA6/FKBP10/VEGFA/ADAMTS9/PLXND1/PRRX1/SNX17/ENG/SEC24B/PKD2/FOXC1/HES1/COMP/ACVRL1/SOX4
GOBP_POSITIVE_REGULATION_OF_NERVOUS_SYSTEM_DEVELOPMENT	GOBP_POSITIVE_REGULATION_OF_NERVOUS_SYSTEM_DEVELOPMENT	186	0.480416	1.47059	0.000630533	0.0123632	0.009949	3303	tags=37%, list=24%, signal=29%	FLRT2/ROBO1/NIN/FN1/MAP1B/PTPRD/NRP1/PLXNC1/TPBG/EPHB3/SERPINF1/MME/SEMA5A/VEGFA/AMIGO2/OXTR/VEGFC/PLXND1/EGR2/DBN1/PRKCI/NLGN2/SERPINE2/HDAC1/SRRT/UBE2V2/LIF/IL6/KALRN/NAP1L1/SRPX2/GDI1/RELN/NUMBL/CX3CR1/CUX1/LIMK1/PAK1/HDAC2/UFL1/HES1/MYB/PRKCH/CAPRIN2/SHOX2/PARP6/TIAM1/FBXO31/SMO/IL6ST/BIN1/DHX36/BDNF/TIAM2/FZD3/HIF1A/SLIT2/CUL7/KIT/RUFY3/CXCL12/SEMA4D/NTN1/PLXNA2/SHANK3/LRRN1/PLXNB2/DAG1/MACF1
GOBP_PHENOL_CONTAINING_COMPOUND_BIOSYNTHETIC_PROCESS	GOBP_PHENOL_CONTAINING_COMPOUND_BIOSYNTHETIC_PROCESS	19	0.747457	1.79366	0.000634894	0.0124063	0.00998372	618	tags=26%, list=4%, signal=25%	WNT5A/TGFB2/ZEB2/TRPC1/NR4A2
GOMF_ENDOPEPTIDASE_REGULATOR_ACTIVITY	GOMF_ENDOPEPTIDASE_REGULATOR_ACTIVITY	106	0.522994	1.56088	0.000640175	0.0124483	0.0100175	3294	tags=38%, list=24%, signal=29%	SPOCK1/SERPINE1/ITIH5/COL6A3/A2M/SERPINH1/SERPINF1/C3/GAPDH/C4B/TFPI2/SFRP2/COL4A3/TIMP3/SPINK5/SPOCK2/SERPINB6/SERPINE2/NAIP/CD109/BST2/TIMP4/APH1B/RPS6KA3/SERPING1/COL7A1/TIMP2/SERPINB9/BIN1/UBE2Z/UCHL5/PROS1/AGT/RARRES1/PSME1/SERPINB5/SPINK1/CSTB/SERPINA5/PAPLN
GOBP_REGULATION_OF_CELLULAR_RESPONSE_TO_TRANSFORMING_GROWTH_FACTOR_BETA_STIMULUS	GOBP_REGULATION_OF_CELLULAR_RESPONSE_TO_TRANSFORMING_GROWTH_FACTOR_BETA_STIMULUS	103	0.533075	1.58498	0.000642138	0.0124483	0.0100175	1950	tags=25%, list=14%, signal=22%	CAV1/THBS1/HTRA1/LTBP1/HIPK2/PEG10/FAM89B/CITED2/ADAM17/ASPN/TGFB3/DKK3/SPRY1/CHST11/HSPA5/CD109/HTRA3/VASN/ENG/PDPK1/MIR17HG/DAB2/BAMBI/FBN1/CAV2/HSP90AB1
GOBP_TISSUE_REMODELING	GOBP_TISSUE_REMODELING	121	0.520211	1.56953	0.000645572	0.0124483	0.0100175	2969	tags=37%, list=21%, signal=29%	CAV1/SEMA3C/GREM1/DDR2/SPP1/CLDN18/IGFBP5/F2R/FLNA/GJA1/S1PR1/TGM2/SFRP1/MMP2/LGR4/BGN/SYT7/TGFB3/LIPA/AXL/TFRC/ATP7A/LIF/NOS3/IL6/CA2/IL18/PLEKHM1/CD38/ADRB2/FOXC1/MEF2C/ACVRL1/ADAM8/CSF1R/ATG5/NOTCH2/GPR137/TNFRSF11B/AGT/MMP14/ATP6AP1/HIF1A/PDK4/SNX10
GOBP_POSITIVE_REGULATION_OF_INTERLEUKIN_6_PRODUCTION	GOBP_POSITIVE_REGULATION_OF_INTERLEUKIN_6_PRODUCTION	62	0.576596	1.64667	0.000645707	0.0124483	0.0100175	1598	tags=27%, list=12%, signal=24%	WNT5A/F2R/IL16/TYROBP/CD36/TLR1/CLEC7A/TLR7/TLR6/TLR8/TNFSF4/PTAFR/IL6/IFIH1/TLR4/EREG/IL33
GOMF_PEPTIDASE_REGULATOR_ACTIVITY	GOMF_PEPTIDASE_REGULATOR_ACTIVITY	133	0.505712	1.52827	0.000653536	0.0125571	0.010105	2918	tags=31%, list=21%, signal=25%	CAV1/SPOCK1/PI15/FN1/SERPINE1/ITIH5/COL6A3/A2M/SERPINH1/SERPINF1/C3/GAPDH/C4B/TFPI2/SFRP2/COL4A3/TIMP3/SPINK5/SPOCK2/SERPINB6/SERPINE2/NAIP/CD109/BCL2L13/BST2/TIMP4/APH1B/RPS6KA3/SERPING1/GPC3/COL7A1/TIMP2/SERPINB9/BIN1/UBE2Z/UCHL5/PROS1/AGT/RARRES1/PSME1/SERPINB5
GOMF_PHOSPHATIDYLINOSITOL_3_KINASE_REGULATORY_SUBUNIT_BINDING	GOMF_PHOSPHATIDYLINOSITOL_3_KINASE_REGULATORY_SUBUNIT_BINDING	10	0.846308	1.7629	0.000661285	0.0126636	0.0101908	1123	tags=40%, list=8%, signal=37%	PTPN13/PIK3AP1/FAM83A/NLRC3
GOBP_EXTRACELLULAR_MATRIX_DISASSEMBLY	GOBP_EXTRACELLULAR_MATRIX_DISASSEMBLY	54	0.600185	1.67787	0.000666312	0.0127175	0.0102341	1372	tags=31%, list=10%, signal=28%	DDR2/FAP/HTRA1/ETS1/A2M/CTSS/MMP2/PRSS1/MMP15/ADAMTS4/PDPN/SH3PXD2B/LCP1/LAMC1/CLASP1/IL6/ADAMTS5
GOBP_RESPONSE_TO_FLUID_SHEAR_STRESS	GOBP_RESPONSE_TO_FLUID_SHEAR_STRESS	28	0.684702	1.75322	0.000672034	0.0127488	0.0102593	2064	tags=43%, list=15%, signal=37%	PDGFRB/ETS1/GJA1/CITED2/TGFB3/ABCA1/NOS3/CA2/HAS2/KLF2/PKD2/MEF2C
GOBP_POSITIVE_REGULATION_OF_TUMOR_NECROSIS_FACTOR_SUPERFAMILY_CYTOKINE_PRODUCTION	GOBP_POSITIVE_REGULATION_OF_TUMOR_NECROSIS_FACTOR_SUPERFAMILY_CYTOKINE_PRODUCTION	64	0.579328	1.65822	0.000672389	0.0127488	0.0102593	2327	tags=34%, list=17%, signal=29%	THBS1/WNT5A/PTPRC/TYROBP/CD36/TLR1/CD14/CLEC7A/SASH3/PTAFR/MAPKAPK2/IL6/IFIH1/TLR4/IL33/IFNGR1/HDAC2/CD2/LGALS9/RIPK2/ADAM8/LY96
GOBP_FIBRINOLYSIS	GOBP_FIBRINOLYSIS	11	0.817425	1.74379	0.000678414	0.0128207	0.0103172	749	tags=45%, list=5%, signal=43%	THBS1/SERPINE1/FAP/PLAU/PLAT
GOBP_ORGAN_GROWTH	GOBP_ORGAN_GROWTH	114	0.523419	1.5743	0.000683419	0.0128729	0.0103592	2399	tags=34%, list=17%, signal=29%	DDR2/GATA6/BASP1/HEG1/ZFPM2/PDGFRB/TGFB2/GJA1/RARB/S1PR1/BNC2/ESR1/SMPD3/ECM1/BCL2L11/SOX9/SOD1/SASH3/EVC/STC1/AR/WWC2/GLI1/RGS2/RGS4/FGFR2/MIR17HG/PAK1/HLX/PDLIM5/FOXC1/WT1/ERBB4/COMP/MEF2C/NDRG4/GATA4/SMO/STK3
GOBP_SMOOTH_MUSCLE_CELL_MIGRATION	GOBP_SMOOTH_MUSCLE_CELL_MIGRATION	61	0.590176	1.68257	0.000686615	0.0128909	0.0103736	1777	tags=33%, list=13%, signal=29%	SERPINE1/IGFBP3/PDGFRB/IGFBP5/NRP1/PLAU/DOCK4/ADAMTS1/NR4A3/LPAR1/ARPC5/POSTN/PLAT/NOX4/ATP7A/RPS6KB1/PDGFD/HAS2/PAK1/SEMA6D
GOBP_EMBRYONIC_DIGESTIVE_TRACT_DEVELOPMENT	GOBP_EMBRYONIC_DIGESTIVE_TRACT_DEVELOPMENT	22	0.712966	1.74492	0.000689029	0.012894	0.0103762	2113	tags=50%, list=15%, signal=42%	RARRES2/TGFB2/RARB/STRA6/PDGFRA/PCSK5/PKDCC/FGFR2/HLX/SHOX2/FOXF2
GOBP_TRABECULA_MORPHOGENESIS	GOBP_TRABECULA_MORPHOGENESIS	33	0.661451	1.72491	0.000705649	0.0131622	0.010592	1753	tags=30%, list=13%, signal=27%	GREM1/HEG1/TGFB2/S1PR1/ADAMTS1/SFRP1/MMP2/NRG1/ENG/COL1A1
GOMF_NADPLUS_NUCLEOSIDASE_ACTIVITY	GOMF_NADPLUS_NUCLEOSIDASE_ACTIVITY	12	0.808904	1.76854	0.000709585	0.0131928	0.0106166	1589	tags=58%, list=11%, signal=52%	IL1R1/TLR1/TLR6/IL18R1/BST1/TLR4/CD38
GOBP_DEVELOPMENTAL_GROWTH_INVOLVED_IN_MORPHOGENESIS	GOBP_DEVELOPMENTAL_GROWTH_INVOLVED_IN_MORPHOGENESIS	170	0.489156	1.49565	0.000732521	0.0135753	0.0109244	1950	tags=24%, list=14%, signal=20%	SEMA3C/NIN/WNT5A/FN1/MAP1B/SPP1/NRP1/NKD1/NRP2/NDN/S1PR1/ESR1/SFRP1/SFRP2/TNC/SEMA3D/SEMA5A/POSTN/CPNE5/SEMA3E/LAMB2/SEMA3F/VEGFA/SPRY1/OLFM1/SOX9/DBN1/WASF1/ALCAM/PPP3CB/FGF1/CDK5R1/GDI1/FGFR2/LIMK1/PAK1/PTK7/SEMA6D/CCL11/HSP90AB1
GOBP_REGULATION_OF_EXTRINSIC_APOPTOTIC_SIGNALING_PATHWAY	GOBP_REGULATION_OF_EXTRINSIC_APOPTOTIC_SIGNALING_PATHWAY	127	0.506418	1.5291	0.000737711	0.0136241	0.0109636	2762	tags=33%, list=20%, signal=27%	CAV1/THBS1/SCG2/SERPINE1/SNAI2/PMAIP1/LGALS3/PTPRC/BCL2L14/SFRP1/SFRP2/HMOX1/TIMP3/PEA15/TNFSF12/FAS/BMPR1B/AR/RPS6KB1/PHIP/WWOX/NOS3/HSPA1B/TRAF1/G0S2/BCL2L1/FEM1B/TNFRSF10A/ZMYND11/IFI6/UNC5B/ZC3HC1/FAIM2/GPX1/DDX3X/STK3/RAF1/HSPA1A/GCLM/AGT/DAPK3/BRCA1
GOCC_EXTERNAL_SIDE_OF_PLASMA_MEMBRANE	GOCC_EXTERNAL_SIDE_OF_PLASMA_MEMBRANE	194	0.474755	1.45604	0.00074099	0.0136241	0.0109636	3287	tags=40%, list=24%, signal=31%	THBS1/CDH5/IL1R1/ANXA1/HEG1/MCAM/CD248/CLEC2B/MSR1/CDH13/CCRL2/S1PR1/PTPRC/IGLL5/CD36/CLEC14A/FCGR3A/PKHD1/CD14/B4GALT1/PDGFRA/CD80/IL7R/CD40/TLR8/FAS/ICOSLG/MUC17/ENPEP/TFRC/SERPINE2/AZGP1/ALCAM/NT5E/B2M/PDCD1LG2/TLR4/MFGE8/ANTXR1/F3/CX3CR1/ENG/ABCB1/LIFR/PRLR/ENOX1/CD2/CD1D/ABCG1/CSF3R/ITGA1/FCER1G/BTN2A1/GPC4/CCR1/CD34/IL6ST/BCAM/FCGRT/MAP3K5/CD4/CLEC2D/FLOT1/CD163/TGFBR3/LY75/P2RY12/KIT/CXCL1…
GOBP_REGULATION_OF_EXTRACELLULAR_MATRIX_DISASSEMBLY	GOBP_REGULATION_OF_EXTRACELLULAR_MATRIX_DISASSEMBLY	13	0.790643	1.76286	0.000743523	0.0136241	0.0109636	1226	tags=46%, list=9%, signal=42%	DDR2/FAP/ETS1/PDPN/CLASP1/IL6
GOBP_SEMI_LUNAR_VALVE_DEVELOPMENT	GOBP_SEMI_LUNAR_VALVE_DEVELOPMENT	37	0.645359	1.71533	0.000744639	0.0136241	0.0109636	1173	tags=27%, list=8%, signal=25%	ROBO1/SNAI2/TGFB2/HEYL/GJA5/STRA6/SOX9/ELN/SNAI1/NOS3
GOCC_GAP_JUNCTION	GOCC_GAP_JUNCTION	14	0.771273	1.72908	0.000753792	0.0137076	0.0110309	1235	tags=36%, list=9%, signal=33%	GJC1/GJA1/GJA5/DBN1/SPECC1L
GOBP_REGULATION_OF_HEART_CONTRACTION	GOBP_REGULATION_OF_HEART_CONTRACTION	137	0.499007	1.51072	0.00075398	0.0137076	0.0110309	3538	tags=43%, list=25%, signal=32%	CAV1/BVES/GJC1/KCNE3/ADM/ABCC9/FLNA/TGFB2/KCND2/GJA1/CYP2J2/GJA5/TRPC1/CACNA1H/PDE4B/FXYD6/ATP1B1/SLC9A1/STC1/ANK2/CELF2/YWHAE/RGS2/AKAP9/RGS4/CLIC2/RNF207/ITPR2/KCND1/ADORA1/SLC8A1/AVPR1A/SEMA3A/GSTM2/THRA/GATA4/ACE2/BIN1/ASB3/HBEGF/KCNJ2/AGT/SCN4B/KCNK1/TMEM65/KCND3/CXADR/DMPK/NOS1AP/RYR3/ATP1B3/SCN3B/GNAO1/SMAD7/CACNB3/ZMPSTE24/GAA/FXYD3/HDAC4
GOBP_REGULATION_OF_BLOOD_CIRCULATION	GOBP_REGULATION_OF_BLOOD_CIRCULATION	161	0.489774	1.49291	0.000790187	0.0143206	0.0115242	3176	tags=38%, list=23%, signal=30%	CAV1/BVES/GJC1/KCNE3/ADM/ABCC9/F2R/FLNA/TGFB2/KCND2/GJA1/CYP2J2/DOCK4/GJA5/TRPC1/CACNA1H/PDE4B/OXTR/FXYD6/ATP1B1/SLC9A1/STC1/ANK2/PTAFR/CELF2/PTGER2/YWHAE/RGS2/AKAP9/RGS4/CLIC2/CD38/KCNMB2/RNF207/ITPR2/KCND1/ADORA1/SLC8A1/AVPR1A/SEMA3A/GSTM2/THRA/GATA4/ACE2/BIN1/KCNMB4/ASB3/HBEGF/KCNJ2/AGT/SCN4B/KCNK1/TMEM65/KCND3/CXADR/DMPK/NOS1AP/RYR3/ATP1B3/SCN3B/GNAO1
GOBP_ACUTE_INFLAMMATORY_RESPONSE	GOBP_ACUTE_INFLAMMATORY_RESPONSE	60	0.592475	1.68726	0.000793576	0.0143368	0.0115372	2381	tags=38%, list=17%, signal=32%	FN1/PTGS2/TREM1/NUPR1/PTGES/PRCP/SAA2/C3/S100A8/B4GALT1/SAA1/TNFSF4/PLSCR1/CEBPB/IL20RB/IL6/F3/F8/NLRP3/ADORA1/EDNRB/ADAM8/IL6ST
GOBP_RESPONSE_TO_ESTROGEN	GOBP_RESPONSE_TO_ESTROGEN	48	0.609206	1.68086	0.000799656	0.0144013	0.0115891	1251	tags=27%, list=9%, signal=25%	CAV1/GATA6/PDGFRB/NCOA4/CITED2/ESR1/SFRP1/SLC34A2/HMOX1/TGFB3/LDHA/AR/CA2
GOBP_CELLULAR_OXIDANT_DETOXIFICATION	GOBP_CELLULAR_OXIDANT_DETOXIFICATION	66	0.564681	1.62154	0.00080464	0.0144458	0.0116249	2349	tags=35%, list=17%, signal=29%	PXDN/PTGS2/GPX3/SOD2/MGST3/FBLN5/PTGES/H19/CD36/NQO1/SOD1/ATP7A/NOS3/MGST1/GPX2/GPX4/CLIC2/GSTK1/GPX7/GSTO2/GPX1/GSTM2/GSTA1
GOCC_ENDOCYTIC_VESICLE	GOCC_ENDOCYTIC_VESICLE	241	0.456356	1.40629	0.000831368	0.0148792	0.0119737	2867	tags=28%, list=21%, signal=23%	CAV1/DYSF/VIM/RAB31/WNT5A/CYBB/FZD4/OCLN/MSR1/CTSS/SGIP1/RAB23/CD36/TLR1/LPAR1/RAB7A/SYT7/SAA1/ABCA1/TLR7/TLR6/MPEG1/GRIA3/RAB11FIP3/SPARC/STX6/WNT4/CLTCL1/ATP7A/SCARB1/ARF6/SNAP23/B2M/NOS3/CAMK2G/ATP6V0B/NCF2/MDM2/CLTC/RAB34/SYT11/ATP6V0A2/MYO1C/RAB32/CDC42/CLTA/ADAM8/UBC/AVPR1A/INPP5B/SMO/VPS26B/PICALM/RAB5A/PIK3C2B/KIF5B/NOSTRIN/ATG5/OCRL/DMBT1/HBEGF/RAB14/CD163/RAPGEF1/PLD1/LPAR2/STAB1/HLA-DQ…
GOBP_DIGESTIVE_TRACT_MORPHOGENESIS	GOBP_DIGESTIVE_TRACT_MORPHOGENESIS	32	0.657966	1.72587	0.000844563	0.0150684	0.0121259	2947	tags=50%, list=21%, signal=39%	WNT5A/EPHB3/SFRP1/SFRP2/STRA6/PDGFRA/AGR2/GLI1/AHI1/FGFR2/HLX/SHOX2/GATA4/TP63/HIF1A/FOXF1
GOBP_RESPONSE_TO_OXIDATIVE_STRESS	GOBP_RESPONSE_TO_OXIDATIVE_STRESS	341	0.438284	1.36103	0.000847194	0.0150685	0.012126	2742	tags=26%, list=20%, signal=21%	PXDN/ANXA1/PTGS2/GPX3/PDGFRB/CYBB/SOD2/ETS1/FBLN5/TRPC6/H19/PRKD1/DUSP1/NR4A3/CD36/MSRB3/NQO1/PYCR2/MMP2/SMPD3/FOXO1/PDGFRA/HMOX1/APOD/FUT8/THG1L/AXL/NR4A2/STX2/PRKAA1/TLR6/ERMP1/SOD1/MAPKAP1/NOX4/PLA2R1/IDH1/SLC25A24/ARL6IP5/LDHA/ATP7A/NOS3/PPP1R15B/MGST1/PDGFD/IL6/NCF2/HSPA1B/GPX2/MELK/GPX4/PPP2CB/TLR4/GCLC/CAMKK2/KLF2/CD38/CASP3/PKD2/KEAP1/MMP9/GPX7/PAWR/HDAC2/COL1A1/FER/MPV17/TOR1A/MYB/MET/FA…
GOBP_EXTRACELLULAR_MATRIX_ASSEMBLY	GOBP_EXTRACELLULAR_MATRIX_ASSEMBLY	37	0.642858	1.70868	0.00085026	0.0150764	0.0121324	1670	tags=43%, list=12%, signal=38%	PHLDB2/PXDN/MYH11/FBLN5/MFAP4/SMPD3/LAMB2/FKBP10/SOX9/LAMB1/ATP7A/THSD4/CLASP1/HAS2/ANTXR1/COL1A2
GOCC_ACTIN_CYTOSKELETON	GOCC_ACTIN_CYTOSKELETON	373	0.430594	1.3379	0.000856353	0.0151377	0.0121817	3356	tags=33%, list=24%, signal=26%	CNN3/MYLK/DDR2/ANXA1/FERMT2/RDX/TPM2/MYH11/CDH2/ASAP1/PLS3/FLNA/IQGAP2/PDLIM3/ACTG1/CFL2/FLT1/PALLD/SPECC1/MARCKS/GAS2L1/EPHA3/ADAM17/CALD1/FGR/ARPC5/BAG3/NOTCH3/ARHGEF5/ANG/MYRIP/AXL/LSP1/ACTA2/MPRIP/HCK/GAS7/TMOD1/DCTN6/NOX4/SH3PXD2B/DBN1/GABARAP/MYO10/LCP1/WASF1/MYH9/KLHL20/AMPH/GNG12/DPYSL3/DLC1/SPECC1L/LIMA1/NCOA5/MYO5A/AHNAK/KALRN/TMOD3/SHROOM3/PARVB/IFIT5/AFAP1/MAEA/VILL/PAK1/MYO1C/PKD2/CL…
GOBP_VASCULOGENESIS	GOBP_VASCULOGENESIS	60	0.590967	1.68297	0.00087244	0.0153748	0.0123725	2947	tags=38%, list=21%, signal=30%	CAV1/GJC1/QKI/HEG1/ADM/ZFPM2/PDGFRB/FZD4/VEGFA/RASA1/HAS2/ENG/ZFP36L1/WT1/CCM2/APLNR/RRAS/CD34/SMO/TGFBR3/MYO1E/CUL7/FOXF1
GOMF_PROTEIN_TYROSINE_KINASE_ACTIVITY	GOMF_PROTEIN_TYROSINE_KINASE_ACTIVITY	115	0.515359	1.55295	0.000877788	0.0154217	0.0124103	2042	tags=27%, list=15%, signal=23%	EFEMP1/DDR2/PDGFRB/NRP1/NRP2/BAZ1B/FLT1/HIPK2/EPHB3/CLK1/EPHA3/LCK/FGR/TEC/PDGFRA/AXL/HCK/PKDCC/MAP2K6/PDGFRL/MERTK/MELK/IGF1R/CAMKK2/FGFR2/ERBB3/FER/ABL2/EFNB3/ERBB4/MET
GOBP_POSITIVE_REGULATION_OF_SYNAPSE_ASSEMBLY	GOBP_POSITIVE_REGULATION_OF_SYNAPSE_ASSEMBLY	34	0.644913	1.69031	0.000881541	0.0154404	0.0124253	1353	tags=26%, list=10%, signal=24%	FLRT2/PTPRD/TPBG/EPHB3/AMIGO2/OXTR/NLGN2/UBE2V2/SRPX2
GOCC_APICAL_PART_OF_CELL	GOCC_APICAL_PART_OF_CELL	259	0.44946	1.38644	0.000893881	0.0156089	0.0125609	3593	tags=40%, list=26%, signal=30%	NIN/DDR2/ANXA1/FN1/FAP/CLCN5/RDX/SLC16A3/CDH2/PDGFRB/SLC12A2/OCLN/MPDZ/GJA1/SLC30A5/F2RL2/CD36/USH1C/ADAM17/PKHD1/SLC6A20/SLC34A2/SLC15A2/ATP6V1E1/PRKAA1/SLC39A14/MSN/OXTR/LZTS1/PDPN/MUC17/ENPEP/NOX4/ATP1B1/SLC9A1/PRKCI/ATP7A/STC1/ANK2/LGMN/GNAS/PODXL/MGST1/CA2/SLC4A2/SLC9B2/SHROOM3/SLC16A1/CETN2/PSEN2/IFIT5/KCNMA1/ABCB1/BST2/SCNN1A/ERBB3/ADRB2/CLIC4/SLC5A1/AKR1A1/CLDN1/HSP90AB1/MARVELD2/P2RY1/SL…
GOBP_NEGATIVE_REGULATION_OF_VASCULATURE_DEVELOPMENT	GOBP_NEGATIVE_REGULATION_OF_VASCULATURE_DEVELOPMENT	70	0.564072	1.63117	0.000915832	0.0159438	0.0128304	961	tags=21%, list=7%, signal=20%	THBS1/COL4A2/SERPINE1/TGFB2/SLC12A2/SERPINF1/ADAMTS1/COL4A3/SEMA3E/SULF1/SPINK5/PTPRM/SPARC/ADAMTS9/WNT4
GOBP_REGULATION_OF_COAGULATION	GOBP_REGULATION_OF_COAGULATION	46	0.610792	1.66987	0.000942554	0.0163594	0.0131649	1460	tags=28%, list=11%, signal=25%	CAV1/THBS1/TSPAN8/SERPINE1/FAP/F2R/PLAU/CD36/PDGFRA/PLAT/SERPINE2/NOS3/F3
GOBP_RESPONSE_TO_INORGANIC_SUBSTANCE	GOBP_RESPONSE_TO_INORGANIC_SUBSTANCE	368	0.433125	1.34567	0.000948031	0.0164049	0.0132015	3274	tags=32%, list=24%, signal=25%	CAV1/MT2A/THBS1/WNT5A/SYT13/ANXA1/MAP1B/PDGFRB/CYBB/SOD2/ETS1/SLC12A2/FBLN5/PTGES/TRPC6/SLC30A5/H19/SERPINF1/DUSP1/TFF1/NR4A3/CD36/ATP7B/NQO1/S100A8/SMPD3/CD14/FOXO1/HMOX1/SYT7/TRPC1/CPNE5/AXL/CACNA1H/PRKAA1/SPARC/SOD1/SUCNR1/SLC25A24/LDHA/TNFSF4/HSPA5/ATP7A/PLSCR1/LGMN/B2M/NOS3/PPP1R15B/PDGFD/FECH/IL6/CA2/FSTL3/COL18A1/PPP2CB/ENTPD6/SYT11/GDI1/HAAO/KCNMA1/KLF2/FMR1/KCNMB2/CASP3/PKD2/CLIC4/MMP9/S…
GOCC_CELL_LEADING_EDGE	GOCC_CELL_LEADING_EDGE	333	0.435768	1.35195	0.000966438	0.0166732	0.0134174	2738	tags=27%, list=20%, signal=22%	VIM/PHLDB2/MYLK/PTPN13/FAP/FERMT2/RDX/CDH2/SLC39A6/IQGAP2/ABCA7/OCLN/APBB2/PALLD/FAM89B/STMN2/INPPL1/ADAM17/FGR/ARPC5/CLIP1/TUBB3/STX2/ACTA2/ITGB1/PTPRM/GABARAPL1/PDPN/ABI3/RASA1/SLC9A1/PLXND1/DBN1/SGCE/PRKCI/ATP7A/MYO10/LCP1/WASF1/MYH9/ARF6/AMPH/PODXL/DPYSL3/DLC1/LDB2/LIMA1/MYO5A/ABI2/DST/TLR4/ANTXR1/ARHGEF26/PARVB/IFIT5/PHACTR4/PIP5K1A/LIMK1/PAK1/MYO1C/PKD2/ARFIP2/FER/ENAH/ITGA8/EPS8/APC/PIK3CA…
GOMF_G_PROTEIN_COUPLED_RECEPTOR_BINDING	GOMF_G_PROTEIN_COUPLED_RECEPTOR_BINDING	157	0.485728	1.47861	0.000975206	0.0167603	0.0134875	2307	tags=31%, list=17%, signal=26%	CXCL6/WNT5A/UCHL1/GNAI1/ADM/CNRIP1/FLNA/CCRL2/S1PR1/C3/SFRP1/GNAI2/SAA1/NES/APLP1/RTP4/FPR1/TFF2/USP20/DEFB1/CXCL16/FZD1/GNAZ/WNT4/DVL3/GNAS/CXCL1/GPRC5B/HSPA1B/CCL18/HOMER3/ARHGEF1/PPP1R1B/CCL22/GNA12/BAMBI/CXCL11/GNAL/CCL11/P2RY1/HSPA8/GCG/ADORA1/EDNRB/ARRB1/TUB/CCL2/AVPR1A/GNA11
GOBP_SPROUTING_ANGIOGENESIS	GOBP_SPROUTING_ANGIOGENESIS	96	0.524062	1.55186	0.000977321	0.0167603	0.0134875	1574	tags=25%, list=11%, signal=22%	THBS1/ROBO1/GREM1/ANXA1/PTGS2/AKT3/NRP1/CDH13/CLEC14A/HMOX1/SEMA5A/SEMA3E/VEGFA/ANGPT1/GLUL/MMRN2/VEGFC/ADAMTS9/RHOJ/SRPX2/E2F7/FGF1/KLF2/PDPK1
GOBP_EXTRINSIC_APOPTOTIC_SIGNALING_PATHWAY	GOBP_EXTRINSIC_APOPTOTIC_SIGNALING_PATHWAY	181	0.468501	1.4349	0.000986818	0.0168728	0.013578	2762	tags=30%, list=20%, signal=24%	CAV1/THBS1/SCG2/SERPINE1/SNAI2/TGFB2/PMAIP1/LGALS3/PTPRC/BCL2L14/SFRP1/SFRP2/BAG3/HMOX1/TIMP3/MLLT11/PEA15/BCL2L11/TNFSF12/FAS/IFI27/GABARAP/BMPR1B/AR/RPS6KB1/PHIP/WWOX/NOS3/HSPA1B/TRAF1/G0S2/PDPK1/IL33/BCL2L1/ERBB3/FEM1B/CASP3/TNFRSF10A/ZMYND11/IFI6/UNC5B/ZC3HC1/FAIM2/ACVR1B/DDX47/GPX1/DDX3X/STK3/RAF1/HSPA1A/GCLM/AGT/DAPK3/BRCA1
GOBP_POSITIVE_CHEMOTAXIS	GOBP_POSITIVE_CHEMOTAXIS	42	0.619923	1.68343	0.00100211	0.0170834	0.0137475	804	tags=26%, list=6%, signal=25%	WNT5A/SCG2/NRP1/IL16/CDH13/S1PR1/LGALS3/SEMA5A/VEGFA/ANGPT1/VEGFC
GOBP_POSITIVE_REGULATION_OF_PROTEIN_SERINE_THREONINE_KINASE_ACTIVITY	GOBP_POSITIVE_REGULATION_OF_PROTEIN_SERINE_THREONINE_KINASE_ACTIVITY	237	0.461313	1.42176	0.00100526	0.0170865	0.01375	2489	tags=27%, list=18%, signal=22%	THBS1/ROBO1/PDGFC/WNT5A/TAB2/FERMT2/PDGFRB/FZD4/FAM20A/MDFIC/FLT1/PTPRC/ADAM17/LPAR1/TGFB3/ARHGEF5/GADD45B/SAA1/PEA15/VEGFA/FPR1/PRKAA1/MLKL/TLR6/CD40/MAP2K6/SOD1/MAPK10/DVL3/MAPKAPK2/HTR2B/PDGFD/NRG1/DUSP19/TLR4/CRKL/FGF1/CDK5R1/TGFA/DKK1/PAK1/MAP4K5/SHC1/PKD2/ADRB2/UBE2N/HMGA2/CCND1/HSP90AB1/MAP3K11/ITGA1/IRAK1/RIPK2/TIAM1/ARRB1/DBF4/ADAM8/UBC/DDX3X/STK3/MAPKAPK3/MAP3K5/CSF1R
GOBP_POSITIVE_REGULATION_OF_PRODUCTION_OF_MOLECULAR_MEDIATOR_OF_IMMUNE_RESPONSE	GOBP_POSITIVE_REGULATION_OF_PRODUCTION_OF_MOLECULAR_MEDIATOR_OF_IMMUNE_RESPONSE	69	0.559023	1.6098	0.00102697	0.0174039	0.0140054	2058	tags=29%, list=15%, signal=25%	IL1R1/WNT5A/LAPTM5/PTPRC/NR4A3/CD36/CLEC7A/IL18R1/CD40/SASH3/TFRC/TNFSF4/B2M/IL6/GPRC5B/IL18/TLR4/IL33/NLRP3/RSAD2
GOBP_RESPONSE_TO_MECHANICAL_STIMULUS	GOBP_RESPONSE_TO_MECHANICAL_STIMULUS	148	0.495266	1.50342	0.00103406	0.0174256	0.0140228	3656	tags=40%, list=26%, signal=30%	THBS1/CHI3L1/MAP1B/CDH2/ETS1/GJA1/TNC/STRA6/BAG3/POSTN/TLR7/SOX9/CD40/TLR8/BTG2/FAS/ANKRD1/SLC9A1/MBD2/SERPINE2/RPS6KB1/TLR4/ENG/NFKBIA/PKD2/TNFRSF10A/COL1A1/BACE1/P2RY1/PIK3CA/COL11A1/SCEL/SLC8A1/IRF1/MEIS2/GATA4/RAF1/COL3A1/KCNJ2/IGFBP2/BNIP3/MMP14/KIT/CXCL12/SLC38A2/MMP7/SHANK3/FOS/DAG1/NRXN2/NFKB1/DCN/CACNB3/CCNB1/USP53/CRADD/HDAC4/BMP6/PPL
GOBP_BRANCHING_MORPHOGENESIS_OF_AN_EPITHELIAL_TUBE	GOBP_BRANCHING_MORPHOGENESIS_OF_AN_EPITHELIAL_TUBE	109	0.519404	1.55707	0.00103931	0.0174256	0.0140228	2947	tags=35%, list=21%, signal=28%	GREM1/WNT5A/NRP1/COL4A1/PGR/ESR1/SFRP2/PKHD1/LGR4/EDNRA/TNC/SEMA3E/VEGFA/SPRY1/SOX9/PLXND1/WNT4/AR/ADAMTS16/FGF1/ENG/FGFR2/PAK1/PKD2/CLIC4/CELSR1/CCL11/WT1/MET/GPC3/SMO/AGT/MMP14/ESRP2/SALL1/SLIT2/DCHS1/FOXF1
GOBP_REGULATION_OF_PROTEIN_SERINE_THREONINE_KINASE_ACTIVITY	GOBP_REGULATION_OF_PROTEIN_SERINE_THREONINE_KINASE_ACTIVITY	379	0.429725	1.33615	0.00104007	0.0174256	0.0140228	2522	tags=25%, list=18%, signal=21%	CAV1/THBS1/ROBO1/PDGFC/WNT5A/TAB2/UCHL1/HEG1/FERMT2/PDGFRB/FZD4/FAM20A/MDFIC/PKIG/FLT1/BCCIP/CCNG2/PTPRC/DUSP1/SFRP1/ADAM17/LPAR1/SFRP2/GPS1/TGFB3/ARHGEF5/GADD45B/SAA1/PEA15/VEGFA/FPR1/SPRY1/PRKAA1/MLKL/PKIB/TLR6/CD40/MAP2K6/PKIA/SOD1/MAPK10/CCNI/CCNB2/DVL3/DTNBP1/MAPKAPK2/HTR2B/MAPK8IP1/PDCD4/PDGFD/NRG1/DUSP19/RGS2/TLR4/CRKL/FGF1/IGF1R/CDK5R1/RGS4/TGFA/DKK1/PAK1/MAP4K5/CCNF/CASP3/SHC1/PKD2/ADRB2…
GOBP_DEFENSE_RESPONSE_TO_GRAM_POSITIVE_BACTERIUM	GOBP_DEFENSE_RESPONSE_TO_GRAM_POSITIVE_BACTERIUM	39	0.629727	1.68306	0.00104038	0.0174256	0.0140228	1226	tags=28%, list=9%, signal=26%	LYZ/RARRES2/SSC5D/CD36/ADAM17/FGR/ANG/IL7R/MPEG1/DEFB1/IL6
GOBP_BONE_MINERALIZATION	GOBP_BONE_MINERALIZATION	82	0.551326	1.60857	0.00105048	0.0174313	0.0140275	2231	tags=29%, list=16%, signal=25%	GREM1/DDR2/SRGN/S1PR1/ASPN/LGR4/FGR/SMPD3/ECM1/TGFB3/SOX9/PKDCC/PTHLH/WNT4/BMPR1B/FGFR2/COL1A2/ADRB2/ANKH/COMP/MEF2C/GPC3/SLC8A1/CCR1
GOBP_EMBRYO_IMPLANTATION	GOBP_EMBRYO_IMPLANTATION	36	0.65347	1.72325	0.00105128	0.0174313	0.0140275	1763	tags=33%, list=13%, signal=29%	IGFBP7/SPP1/GJA1/MMP2/PCSK5/VEGFA/SOD1/STC1/LIF/VMP1/MMP9/PRLR
GOBP_EPITHELIAL_TUBE_FORMATION	GOBP_EPITHELIAL_TUBE_FORMATION	98	0.52754	1.56618	0.00105214	0.0174313	0.0140275	1732	tags=24%, list=12%, signal=22%	GREM1/WNT5A/ADM/TGFB2/TCTN1/SFRP1/SFRP2/SOX9/PRKACB/WNT4/MTHFR/MIB1/KAT2A/DVL3/PODXL/DLC1/SHROOM3/PHACTR4/SEC24B/FGFR2/CASP3/MTHFD1L/PTK7/CELSR1
GOBP_ADAPTIVE_THERMOGENESIS	GOBP_ADAPTIVE_THERMOGENESIS	116	0.513373	1.54551	0.00105482	0.0174313	0.0140275	2461	tags=31%, list=18%, signal=26%	LAMA4/CAV1/PDGFC/ZNF423/GJA1/NOVA1/CD36/ADAM17/LGR4/PLCL1/VEGFA/OXTR/IL18R1/MAP2K6/ELOVL6/GNAS/CEBPB/IL18/ADAMTS5/TLR4/IGF1R/G0S2/TFE3/ADRB2/ZNF516/ALDH1A1/PRLR/PLAC8/ACOT13/ALMS1/APC/MFN2/PEMT/THRA/LPIN1/ARRDC3
GOBP_MORPHOGENESIS_OF_EMBRYONIC_EPITHELIUM	GOBP_MORPHOGENESIS_OF_EMBRYONIC_EPITHELIUM	110	0.519848	1.55887	0.00105589	0.0174313	0.0140275	1732	tags=25%, list=12%, signal=22%	GREM1/WNT5A/ADM/TGFB2/ALDH1A3/TCTN1/SFRP1/SFRP2/SULF1/SOX9/VEGFC/PRKACB/WNT4/MTHFR/MIB1/KAT2A/DVL3/AR/DLC1/SHROOM3/PHACTR4/SEC24B/FGFR2/CASP3/MTHFD1L/PTK7/CELSR1
GOMF_SERINE_TYPE_ENDOPEPTIDASE_INHIBITOR_ACTIVITY	GOMF_SERINE_TYPE_ENDOPEPTIDASE_INHIBITOR_ACTIVITY	44	0.611535	1.67166	0.0010615	0.0174736	0.0140615	1307	tags=27%, list=9%, signal=25%	SPOCK1/SERPINE1/ITIH5/COL6A3/A2M/SERPINH1/SERPINF1/TFPI2/SPINK5/SERPINB6/SERPINE2/CD109
GOBP_MESENCHYME_MORPHOGENESIS	GOBP_MESENCHYME_MORPHOGENESIS	39	0.629279	1.68186	0.00107206	0.0175972	0.0141609	2161	tags=31%, list=16%, signal=26%	ROBO1/WNT5A/SNAI2/TGFB2/HEYL/ACTA2/SOX9/SNAI1/NOS3/ENG/FOXC1/ACVRL1
GOBP_DEFENSE_RESPONSE_TO_BACTERIUM	GOBP_DEFENSE_RESPONSE_TO_BACTERIUM	109	0.518356	1.55393	0.00107676	0.017624	0.0141825	2985	tags=34%, list=21%, signal=27%	LYZ/CXCL6/RARRES2/SERPINE1/SSC5D/IGLL5/CD36/ADAM17/FGR/S100A8/GSDMB/ANG/IL7R/SPINK5/TLR6/OCIAD2/MPEG1/DEFB1/NAIP/CEBPB/IL6/ADAMTS5/TLR4/SYT11/SHC1/PLAC8/FCER1G/RIPK2/OPTN/PLA2G6/NOTCH2/DMBT1/CD4/RAB14/STAB1/GBP4/TBK1
GOBP_TRANSFORMING_GROWTH_FACTOR_BETA_RECEPTOR_SIGNALING_PATHWAY	GOBP_TRANSFORMING_GROWTH_FACTOR_BETA_RECEPTOR_SIGNALING_PATHWAY	160	0.488971	1.48929	0.00108666	0.0177353	0.0142721	2252	tags=23%, list=16%, signal=20%	CAV1/THBS1/CDH5/LTBP2/HTRA1/FERMT2/LTBP1/TGFB2/HIPK2/PEG10/FAM89B/CITED2/ADAM17/ASPN/TGFB3/DKK3/FUT8/SPRY1/CHST11/HSPA5/LRRC32/CD109/HTRA3/VASN/ENG/PDPK1/MIR17HG/COL1A2/DAB2/BAMBI/CREB1/FBN1/CAV2/HSP90AB1/PTPRK/ACVRL1/UBC
GOBP_REGULATION_OF_CELL_SUBSTRATE_JUNCTION_ORGANIZATION	GOBP_REGULATION_OF_CELL_SUBSTRATE_JUNCTION_ORGANIZATION	64	0.57163	1.63619	0.00109495	0.0177753	0.0143043	1212	tags=25%, list=9%, signal=23%	PHLDB2/THBS1/GREM1/FERMT2/NRP1/ACTG1/SFRP1/EPHA3/APOD/VEGFA/LIMS1/SLC9A1/WNT4/ARF6/DLC1/CLASP1
GOMF_CELL_ADHESION_MOLECULE_BINDING	GOMF_CELL_ADHESION_MOLECULE_BINDING	441	0.418919	1.30769	0.00109529	0.0177753	0.0143043	2751	tags=24%, list=20%, signal=20%	PHLDB2/THBS1/CPE/CNN3/CDH5/TSPAN8/ANXA1/FN1/EDIL3/FAP/SPP1/PTPRD/FERMT2/RDX/CDH2/VWF/ASAP1/FLNA/FBLN5/CDH13/PALLD/PFN1/PPFIBP1/ADAM17/SFRP2/CALD1/COL4A3/BAG3/LRRC4C/NOTCH3/POSTN/LAMB2/TRPC4/MPRIP/ITGB1/TJP3/MSN/TGFBI/ECM2/PTPRM/CLINT1/LAMB1/ITGBL1/IDH1/EFHD2/LDHA/DBN1/HSPA5/CCNB2/LCP1/NLGN2/MYH9/LIMA1/NRG1/AHNAK/YWHAE/DST/TMOD3/ADAMTS5/CNTN4/CRKL/MFGE8/FGF1/CDK5R1/VASN/S1PR3/EPS15L1/PTK7/ARFIP2/E…
GOBP_REGULATION_OF_PEPTIDYL_TYROSINE_PHOSPHORYLATION	GOBP_REGULATION_OF_PEPTIDYL_TYROSINE_PHOSPHORYLATION	183	0.470863	1.44172	0.00109859	0.0177785	0.0143069	2877	tags=30%, list=21%, signal=24%	CAV1/GREM1/PDGFC/PECAM1/ERRFI1/NRP1/PTPRC/CD36/SFRP1/ADAM17/SH3BP5/SFRP2/TEC/CD80/VEGFA/CLEC7A/ANGPT1/CD40/CNOT7/CTF1/NOX4/ARL2BP/LIF/PDGFD/ENPP2/IL6/GPRC5B/CNTN1/NRG1/BST1/NCAPG2/IL18/ZFYVE28/RELN/EREG/TGFA/ERBB3/SHC1/HDAC2/HES1/ERBB4/ADORA1/RIPK2/IL6ST/SOCS5/CSF1R/BDNF/AREG/CD4/HBEGF/AGT/PTK6/PARP14/NCK2
GOMF_PHOSPHORIC_DIESTER_HYDROLASE_ACTIVITY	GOMF_PHOSPHORIC_DIESTER_HYDROLASE_ACTIVITY	65	0.579011	1.66156	0.00110874	0.0178651	0.0143766	1958	tags=31%, list=14%, signal=27%	PDE3A/PDE10A/F2RL2/GPCPD1/SMPD3/EDNRA/PLCL1/HMOX1/PDE4B/PDE5A/GDPD5/PDE1C/APEX2/PLCB4/PLCXD3/ENPP2/GDPD1/PDE8B/PDE7B/FAN1
GOBP_CARDIOCYTE_DIFFERENTIATION	GOBP_CARDIOCYTE_DIFFERENTIATION	96	0.520365	1.54092	0.00111016	0.0178651	0.0143766	2723	tags=32%, list=20%, signal=26%	BVES/SEMA3C/GREM1/GATA6/MYH11/PDGFRB/TGFB2/RARB/SIK1/PDGFRA/VEGFA/SPRY1/SLC9A1/KAT2A/PDCD4/NRG1/RGS2/RGS4/DKK1/PAK1/PDLIM5/HES1/WT1/FHOD3/SHOX2/MEF2C/SLC8A1/GATA4/DHX36/ATG5/TGFBR3
GOBP_SKIN_EPIDERMIS_DEVELOPMENT	GOBP_SKIN_EPIDERMIS_DEVELOPMENT	60	0.587533	1.67319	0.00111947	0.0179647	0.0144567	2699	tags=40%, list=19%, signal=32%	WNT5A/APCDD1/GATA6/IGFBP5/TGFB2/LGR4/KRT17/FST/SPINK5/SOX9/LGR5/INTU/ATP7A/SNAI1/HDAC1/LDB2/CD109/FGFR2/HDAC2/NOM1/ACVR1B/SMO/TP63/FZD3
GOBP_NEURON_PROJECTION_EXTENSION_INVOLVED_IN_NEURON_PROJECTION_GUIDANCE	GOBP_NEURON_PROJECTION_EXTENSION_INVOLVED_IN_NEURON_PROJECTION_GUIDANCE	30	0.662562	1.72268	0.0011262	0.0180034	0.0144879	1157	tags=33%, list=8%, signal=31%	SEMA3C/WNT5A/NRP1/NRP2/SEMA3D/SEMA5A/SEMA3E/SEMA3F/VEGFA/ALCAM
GOBP_RESPONSE_TO_BMP	GOBP_RESPONSE_TO_BMP	112	0.508298	1.52607	0.0011295	0.0180034	0.0144879	2161	tags=27%, list=16%, signal=23%	CDH5/GREM1/FSTL1/WNT5A/GATA6/HTRA1/ZNF423/TGFB2/HIPK2/HEYL/SFRP1/SFRP2/SMPD3/TGFB3/SULF1/RUNX2/FST/SOX9/BMPR1B/PDCD4/FSTL3/ADAMTS7/HTRA3/ENG/BAMBI/FBN1/HES1/COMP/GPC3/ACVRL1
GOBP_NEGATIVE_REGULATION_OF_CELL_SUBSTRATE_ADHESION	GOBP_NEGATIVE_REGULATION_OF_CELL_SUBSTRATE_ADHESION	51	0.594293	1.65093	0.00113129	0.0180034	0.0144879	2161	tags=31%, list=16%, signal=27%	PHLDB2/SPOCK1/THBS1/SERPINE1/LGALS1/FZD4/ACER2/APOD/POSTN/SEMA3E/RASA1/DLC1/COL1A1/ARHGAP6/BCL6/ACVRL1
GOMF_VASCULAR_ENDOTHELIAL_GROWTH_FACTOR_RECEPTOR_BINDING	GOMF_VASCULAR_ENDOTHELIAL_GROWTH_FACTOR_RECEPTOR_BINDING	12	0.796585	1.74161	0.00113658	0.0180378	0.0145155	804	tags=33%, list=6%, signal=31%	CDH5/GREM1/VEGFA/VEGFC
GOBP_MANGANESE_ION_TRANSPORT	GOBP_MANGANESE_ION_TRANSPORT	11	0.806186	1.71982	0.00114759	0.0181586	0.0146127	1103	tags=45%, list=8%, signal=42%	TRPC6/TRPC1/TRPC4/SLC39A14/ATP2C1
GOBP_POSITIVE_REGULATION_OF_PROTEIN_KINASE_ACTIVITY	GOBP_POSITIVE_REGULATION_OF_PROTEIN_KINASE_ACTIVITY	406	0.422317	1.31463	0.00115052	0.0181586	0.0146127	2804	tags=27%, list=20%, signal=22%	THBS1/ROBO1/GREM1/PDGFC/WNT5A/DDR2/CHI3L1/TAB2/FERMT2/PDGFRB/F2R/TGFB2/FZD4/FAM20A/MDFIC/VLDLR/FLT1/PTPRC/ADAM17/LPAR1/TGFB3/ARHGEF5/GADD45B/ANG/SAA1/PEA15/VEGFA/FPR1/NAB2/PRKAA1/MLKL/TLR6/ANGPT1/CD40/VEGFC/MAP2K6/PRKACB/SOD1/MAPKAP1/MAPK10/NOX4/MAP3K8/DVL3/MAPKAPK2/HTR2B/PDGFD/GPRC5B/NRG1/DUSP19/NCAPG2/IL18/TLR4/CRKL/FGF1/CDK5R1/JTB/RELN/EREG/LCP2/TGFA/PDPK1/DKK1/PAK1/MAP4K5/ERBB3/SHC1/PKD2/ADRB…
GOMF_PATTERN_RECOGNITION_RECEPTOR_ACTIVITY	GOMF_PATTERN_RECOGNITION_RECEPTOR_ACTIVITY	16	0.754869	1.74161	0.00115498	0.018179	0.0146292	2632	tags=69%, list=19%, signal=56%	CD36/CD14/CLEC7A/TLR7/TLR8/SCARB1/PTAFR/TLR4/CLEC4E/LY96/DMBT1
GOBP_INTRACELLULAR_RECEPTOR_SIGNALING_PATHWAY	GOBP_INTRACELLULAR_RECEPTOR_SIGNALING_PATHWAY	212	0.459701	1.41139	0.00116892	0.0183483	0.0147654	3075	tags=28%, list=22%, signal=22%	DCBLD2/TAB2/SNAI2/PGR/MN1/NCOA4/RARB/PRCP/HEYL/NR4A3/CITED2/ESR1/SFRP1/SLC15A2/NR4A2/STRN3/MAP2K6/RIOK3/PER1/HNF4G/NR2F6/HNF4A/NR3C1/AR/HDAC1/DHRS3/CYP7B1/HSPA1B/IFIH1/TLR4/CRKL/SEC14L1/KLF2/PAK1/NFKBIA/DAB2/UBE2N/ASXL2/UFL1/CARM1/RORA/IRAK1/RXRB/RIPK2/UBC/THRA/DDX54/PIAS2/PMEPA1/HSPA1A/NR2C1/TP63/NR1H2/NCOR2/BRCA1/NR2F1/MAP3K7/SLC15A4/GPS2/TIFA
GOBP_POSITIVE_REGULATION_OF_MICROTUBULE_POLYMERIZATION_OR_DEPOLYMERIZATION	GOBP_POSITIVE_REGULATION_OF_MICROTUBULE_POLYMERIZATION_OR_DEPOLYMERIZATION	28	0.673761	1.7252	0.00117501	0.0183918	0.0148004	2537	tags=57%, list=18%, signal=47%	NIN/MAP1B/OCLN/STMN2/CLIP1/NAV3/CLASP1/HSPA1B/CDK5R1/AKAP9/PAK1/MET/KATNB1/SLAIN2/DCTN1/HSPA1A
GOBP_ENDODERM_DEVELOPMENT	GOBP_ENDODERM_DEVELOPMENT	54	0.584553	1.63416	0.0011781	0.0183918	0.0148004	3258	tags=52%, list=23%, signal=40%	COL4A2/GATA6/FN1/DUSP1/MMP2/MMP15/LAMB1/LEO1/HDAC1/LAMC1/PAF1/DKK1/HMGA2/MMP9/COL5A1/COL6A1/ZFP36L1/HSBP1/COL11A1/COL7A1/ITGA7/GATA4/COL12A1/MMP14/LAMA3/PELO/BPTF/ITGB5
GOBP_CELLULAR_RESPONSE_TO_STEROID_HORMONE_STIMULUS	GOBP_CELLULAR_RESPONSE_TO_STEROID_HORMONE_STIMULUS	148	0.493966	1.49947	0.00118311	0.0184199	0.014823	2762	tags=27%, list=20%, signal=22%	SGK1/ANXA1/PAQR8/ERRFI1/PGR/NCOA4/HEYL/SERPINF1/NR4A3/ESR1/SFRP1/UBE2L3/FOXO1/FBXO32/BCL2L11/STRN3/PER1/STC1/NR3C1/AR/RPS6KB1/HDAC1/CYP7B1/FECH/KLF9/PAK1/PGRMC2/DAB2/UFL1/DDIT4/ZFP36L1/CARM1/RXRB/DDX54/PIAS2/PMEPA1/NR2C1/TP63/NCOR2/BRCA1
GOBP_NEGATIVE_REGULATION_OF_PROTEOLYSIS	GOBP_NEGATIVE_REGULATION_OF_PROTEOLYSIS	212	0.459038	1.40935	0.00120574	0.0187216	0.0150658	2765	tags=28%, list=20%, signal=23%	SPOCK1/THBS1/PI15/SERPINE1/ITIH5/GAS1/COL6A3/A2M/SERPINH1/HIPK2/MAP1A/SERPINF1/C3/GAPDH/C4B/TFPI2/SFRP2/COL4A3/ECM1/TIMP3/VEGFA/SPINK5/PLAT/IGBP1/SPOCK2/TMEM98/SERPINB6/SERPINE2/NAIP/FNIP1/CD109/YWHAE/CSNK2A2/BST2/TIMP4/MMP9/RPS6KA3/IFI6/HSP90AB1/AQP11/SERPING1/GPC3/COL7A1/GPX1/DDX3X/TIMP2/SERPINB9/BIN1/PICALM/UBE2Z/RAF1/BAG5/UCHL5/NR1H2/PROS1/ARL6IP1/AGT/NLE1/RARRES1
GOBP_REGULATION_OF_PROTEIN_IMPORT	GOBP_REGULATION_OF_PROTEIN_IMPORT	49	0.598492	1.65813	0.00121821	0.0188642	0.0151805	840	tags=20%, list=6%, signal=19%	FLNA/MDFIC/PKIG/RAB23/CD36/BAG3/APOD/ARHGEF5/ANGPT1/PKIA
GOBP_POSITIVE_REGULATION_OF_VASCULAR_PERMEABILITY	GOBP_POSITIVE_REGULATION_OF_VASCULAR_PERMEABILITY	13	0.778607	1.73603	0.0012351	0.0190743	0.0153496	755	tags=38%, list=5%, signal=36%	PDE3A/OCLN/VEGFA/TJP3/ANGPT1
GOCC_DENDRITIC_TREE	GOCC_DENDRITIC_TREE	395	0.427398	1.32893	0.00124256	0.019121	0.0153872	2771	tags=29%, list=20%, signal=24%	CNN3/NIN/KCNE3/MAP1B/ASAP1/CYBB/FLNA/FZD4/MPDZ/KCND2/SNX14/MARK1/GLRB/LAMA2/TPBG/EPHB3/PLXDC1/MAP1A/INPP5A/C4B/NQO1/LPAR1/ABHD13/FXR1/TUBB3/DGKI/APOD/ELOVL5/ATXN10/GNAI2/MME/ELFN1/PRKAA1/PDE4B/STRN3/GRIA3/GABARAPL1/LZTS1/SOD1/KIF5C/DBN1/SGCE/PREX1/TRAK1/CPEB3/BMPR1B/PLCB4/WASF1/KLHL20/DTNBP1/MX1/GNAS/ALCAM/HTR2B/MAPK8IP1/CASC3/ABI2/HOMER3/SLC1A4/CDK5R1/SYT11/ELK1/PPP1R1B/PSEN2/RELN/CX3CR1/CRTC1/F…
GOBP_REGULATION_OF_BIOMINERALIZATION	GOBP_REGULATION_OF_BIOMINERALIZATION	66	0.556484	1.598	0.00124478	0.019121	0.0153872	2258	tags=30%, list=16%, signal=25%	GREM1/DDR2/SRGN/S1PR1/ASPN/ECM1/TGFB3/SOX9/PKDCC/WNT4/BMPR1B/NOS3/CEBPB/ADRB2/ANKH/COMP/MEF2C/SLC8A1/CCR1/FBLN7
GOBP_MONONUCLEAR_CELL_MIGRATION	GOBP_MONONUCLEAR_CELL_MIGRATION	127	0.499646	1.50865	0.00125891	0.0192864	0.0155203	2255	tags=27%, list=16%, signal=23%	THBS1/GREM1/PECAM1/WNT5A/RARRES2/ANXA1/SERPINE1/SLC12A2/FLT1/S1PR1/LGALS3/DUSP1/ADAM17/ECM1/APOD/SAA1/MSN/C3AR1/CXCL16/LGMN/CYP7B1/PDGFD/IL6/CCL18/CRKL/CCL22/CXCL11/CCL11/LGALS9/EPS8/CDC42/CCR1/ADAM8/CCL2
GOBP_REGULATION_OF_NERVOUS_SYSTEM_DEVELOPMENT	GOBP_REGULATION_OF_NERVOUS_SYSTEM_DEVELOPMENT	291	0.443489	1.37081	0.00127937	0.0195479	0.0157307	2699	tags=28%, list=19%, signal=23%	FLRT2/ROBO1/SEMA3C/NIN/WNT5A/FN1/MAP1B/SPP1/PTPRD/HOOK3/NRP1/RARB/PLXNC1/TPBG/EPHB3/HEYL/TRPC6/SERPINF1/DAAM2/SEMA3D/MME/SEMA5A/SEMA3E/SEMA3F/VEGFA/TRIM11/AMIGO2/OXTR/VEGFC/PLXND1/EGR2/DBN1/PRKCI/TMEM98/NLGN2/SERPINE2/HDAC1/SRRT/UBE2V2/B2M/LIF/IL6/KALRN/NAP1L1/SRPX2/CDK5R1/GDI1/RELN/NUMBL/CX3CR1/CUX1/LIMK1/PAK1/HDAC2/UFL1/SEMA6D/ITGAX/SLC25A12/CCL11/MTMR2/HES1/EFNB3/MYB/PRKCH/CAPRIN2/SHOX2/PARP6/…
GOBP_POSITIVE_REGULATION_OF_CYTOSKELETON_ORGANIZATION	GOBP_POSITIVE_REGULATION_OF_CYTOSKELETON_ORGANIZATION	171	0.478632	1.46568	0.00128322	0.0195546	0.0157361	1852	tags=25%, list=13%, signal=22%	NIN/MAP1B/FERMT2/FLNA/NRP1/IQGAP2/OCLN/CFL2/CEP120/CDC42EP5/PFN2/PFN1/STMN2/SFRP1/LPAR1/ARPC5/CLIP1/TGFB3/ARHGEF5/NES/SEMA5A/NAV3/HCK/NOX4/WNT4/WASF1/ARF6/CLASP1/HSPA1B/ABI2/PLK4/CDK5R1/AKAP9/SORBS3/GPR65/LIMK1/PAK1/MYO1C/LMOD1/ARFIP2/FER/CCL11
GOBP_MULTI_MULTICELLULAR_ORGANISM_PROCESS	GOBP_MULTI_MULTICELLULAR_ORGANISM_PROCESS	133	0.496793	1.50131	0.0012949	0.0195763	0.0157536	1763	tags=23%, list=13%, signal=21%	IGFBP7/SPP1/ADM/IGFBP5/ETS1/PGR/GJA1/ESR1/MMP2/B4GALT1/TGFB3/PCSK5/VEGFA/OXTR/PAPPA/SOD1/PTHLH/WNT4/ATP7A/STC1/SERPINE2/AR/PTAFR/LIF/VMP1/KALRN/RGS2/CD38/PTGFR/MMP9/PRLR
GOBP_POSITIVE_REGULATION_OF_ENDOTHELIAL_CELL_PROLIFERATION	GOBP_POSITIVE_REGULATION_OF_ENDOTHELIAL_CELL_PROLIFERATION	72	0.558262	1.61981	0.00129532	0.0195763	0.0157536	1862	tags=28%, list=13%, signal=24%	WNT5A/SCG2/AKT3/NRP1/NRP2/CDH13/PRKD1/ADAM17/ECM1/HMOX1/ANG/SEMA5A/VEGFA/TNFSF12/VEGFC/HTR2B/F3/PDPK1/CCL11/CAV2
GOBP_AXON_DEVELOPMENT	GOBP_AXON_DEVELOPMENT	367	0.423759	1.31607	0.00129778	0.0195763	0.0157536	3303	tags=31%, list=24%, signal=24%	FLRT2/ROBO1/SEMA3C/NIN/WNT5A/FN1/MAP1B/SPP1/CHL1/CDH2/FLNA/NRP1/NRP2/VLDLR/NDN/LAMA2/PLXNC1/PALLD/EPHB3/MAP1A/TCTN1/EPHA3/CRMP1/TUBB3/TNC/SEMA3D/LRRC4C/APOD/NOTCH3/SEMA5A/SEMA3E/LAMB2/NR4A2/SEMA3F/VEGFA/OLFM1/PTPRM/SHC3/NCAM2/KIF5C/PLXND1/EGR2/DBN1/BMPR1B/ALCAM/PPP3CB/KALRN/CHN1/TSPAN2/CNTN4/PRKCQ/CDK5R1/GDI1/RELN/NUMBL/B4GALT6/FGFR2/LIMK1/PAK1/CASP3/SHC1/SLITRK4/GAB1/SEMA6D/NFASC/CREB1/ENAH/UNC5…
GOBP_MAMMARY_GLAND_MORPHOGENESIS	GOBP_MAMMARY_GLAND_MORPHOGENESIS	34	0.634378	1.6627	0.00129932	0.0195763	0.0157536	1852	tags=26%, list=13%, signal=23%	CAV1/WNT5A/IGFBP5/PGR/ESR1/WNT4/AR/FGFR2/CCL11
GOCC_LAMELLIPODIUM	GOCC_LAMELLIPODIUM	171	0.478255	1.46452	0.00130168	0.0195763	0.0157536	2678	tags=29%, list=19%, signal=24%	MYLK/PTPN13/FAP/FERMT2/RDX/CDH2/SLC39A6/IQGAP2/APBB2/PALLD/FAM89B/STMN2/INPPL1/ARPC5/TUBB3/STX2/ACTA2/ITGB1/PTPRM/PDPN/ABI3/SLC9A1/PLXND1/DBN1/MYO10/WASF1/PODXL/DPYSL3/ABI2/ANTXR1/PARVB/PHACTR4/PIP5K1A/LIMK1/PAK1/PKD2/FER/ENAH/APC/PIK3CA/ILK/ACTB/SYNE2/DDX3X/ABLIM1/DGKZ/CTTNBP2NL/FLOT1/PTPRO/TIAM2
GOBP_NERVOUS_SYSTEM_PROCESS	GOBP_NERVOUS_SYSTEM_PROCESS	487	0.41036	1.28382	0.00131619	0.0197117	0.0158625	3711	tags=36%, list=27%, signal=27%	EFEMP1/SGK1/GJC1/SNAI2/F2R/SOD2/ABCA7/FZD4/KCND2/ALDH1A3/VLDLR/NDN/GLRB/PTGES/S1PR1/TPBG/RP2/MAP1A/SERPINF1/CD36/RASGRF1/USH1C/STRA6/COL4A3/TIMP3/MME/RTP4/RABGGTA/LAMB2/CACNA1H/TGFBI/OXTR/ATP8A1/CCDC50/BTG2/NCAM2/SOD1/OAT/BCHE/SCN7A/ARL6IP5/SLC9A1/EGR2/KAT2A/NR2F6/CPEB3/TMEM98/SERPINB6/NLGN2/SERPINE2/PAIP2/RPS6KB1/AZGP1/PTAFR/LGMN/DHRS3/GNAS/PPP3CB/B2M/NOS3/CEBPB/HMCN1/KALRN/COL18A1/VDAC1/SLC1A4/…
GOBP_RETINA_DEVELOPMENT_IN_CAMERA_TYPE_EYE	GOBP_RETINA_DEVELOPMENT_IN_CAMERA_TYPE_EYE	88	0.538133	1.58403	0.00131754	0.0197117	0.0158625	1383	tags=25%, list=10%, signal=23%	PDGFRB/TGFB2/NRP1/COL4A1/FZD4/HIPK2/CDON/SERPINF1/DIO3/FJX1/USH1C/PDGFRA/LAMB2/SOX9/PTPRM/RHOJ/NAGLU/BMPR1B/MERTK/RRM1/LPCAT1/AHI1
GOBP_NEURAL_CREST_CELL_MIGRATION	GOBP_NEURAL_CREST_CELL_MIGRATION	37	0.635474	1.68905	0.00132681	0.0197987	0.0159325	2359	tags=41%, list=17%, signal=34%	SEMA3C/FN1/NRP1/NRP2/SEMA3D/SEMA5A/SEMA3E/SEMA3F/HTR2B/PHACTR4/SEMA6D/ERBB4/EDNRB/SEMA3A/SMO
GOMF_CYTOKINE_ACTIVITY	GOMF_CYTOKINE_ACTIVITY	98	0.523793	1.55505	0.0013365	0.0198917	0.0160074	1852	tags=27%, list=13%, signal=23%	CXCL6/GREM1/WNT5A/SCG2/SPP1/TGFB2/IL16/TGFB3/NAMPT/VEGFA/TNFSF12/CXCL16/CTF1/WNT4/TNFSF4/LIF/CXCL1/IL6/NRG1/CCL18/IL18/CMTM3/CCL22/IL33/CXCL11/CCL11
GOBP_NEGATIVE_REGULATION_OF_NEURON_PROJECTION_DEVELOPMENT	GOBP_NEGATIVE_REGULATION_OF_NEURON_PROJECTION_DEVELOPMENT	100	0.526151	1.56428	0.0013499	0.0200335	0.0161215	2658	tags=33%, list=19%, signal=27%	VIM/SPOCK1/SEMA3C/WNT5A/SPP1/LGALS1/FLNA/NRP1/DENND5A/STMN2/LPAR1/CRMP1/SEMA3D/SEMA5A/SEMA3E/SEMA3F/ARF6/B2M/DPYSL3/CDK5R1/GDI1/CD38/HDAC2/SEMA6D/EFNB3/CARM1/OMG/SEMA3A/MYLIP/BAG5/TRAK2/RTN4/PTPRO
GOBP_REGULATION_OF_LIPID_METABOLIC_PROCESS	GOBP_REGULATION_OF_LIPID_METABOLIC_PROCESS	297	0.437749	1.35347	0.001353	0.0200335	0.0161215	3288	tags=30%, list=24%, signal=24%	CAV1/GLIPR1/RARRES2/ANXA1/IGFBP7/PTGS2/SLC45A3/ADM/SNAI2/PDGFRB/ABCA7/FLT1/PRKD1/C3/NR4A3/CD36/SIK1/FGR/SMPD3/PDGFRA/APOD/ELOVL5/DKK3/ABCA1/PRKAA1/SOX9/H6PD/MVK/SOD1/ELOVL6/NFYB/IDH1/ANKRD1/WNT4/GGPS1/SNAI1/NPC2/SCARB1/HNF4A/ASXL3/HTR2B/ORMDL3/LPCAT1/FGF1/G0S2/PDP2/FMO5/GRHL1/PPP2R5A/TBL1X/FADS1/CREB1/ABCG1/MTMR2/CARM1/RORA/MBOAT7/ADORA1/CDC42/PIK3IP1/ERLIN2/AVPR1A/IDI1/THRA/DGAT2/MTMR3/KPNB1/DGK…
GOBP_VASCULAR_ENDOTHELIAL_GROWTH_FACTOR_SIGNALING_PATHWAY	GOBP_VASCULAR_ENDOTHELIAL_GROWTH_FACTOR_SIGNALING_PATHWAY	35	0.644155	1.69131	0.00136693	0.0201714	0.0162324	2175	tags=40%, list=16%, signal=34%	ROBO1/PDGFRB/NRP1/NRP2/FLT1/PRKD1/PDGFRA/VEGFA/VEGFC/MYO1C/GAB1/FOXC1/PIK3CA/ADAMTS3
GOBP_PHAGOCYTOSIS_RECOGNITION	GOBP_PHAGOCYTOSIS_RECOGNITION	13	0.773647	1.72497	0.00137089	0.0201714	0.0162324	2619	tags=69%, list=19%, signal=56%	PTX3/IGLL5/CD36/C4B/CLEC7A/SCARB1/MFGE8/TUB/PEAR1
GOBP_PRODUCTION_OF_MOLECULAR_MEDIATOR_INVOLVED_IN_INFLAMMATORY_RESPONSE	GOBP_PRODUCTION_OF_MOLECULAR_MEDIATOR_INVOLVED_IN_INFLAMMATORY_RESPONSE	52	0.589369	1.63945	0.00137285	0.0201714	0.0162324	1386	tags=23%, list=10%, signal=21%	SERPINE1/H19/CD36/APOD/CLEC7A/TLR6/PER1/NLRC3/SNAP23/PDCD4/IL6/TLR4
GOBP_RESPIRATORY_GASEOUS_EXCHANGE_BY_RESPIRATORY_SYSTEM	GOBP_RESPIRATORY_GASEOUS_EXCHANGE_BY_RESPIRATORY_SYSTEM	41	0.616763	1.67732	0.00137837	0.0202009	0.0162562	2107	tags=32%, list=15%, signal=27%	ZFAND5/NDN/MAFB/EDNRA/FUT8/NR4A2/CHST11/ELN/NLGN2/COX15/TSHZ3/ADORA1/SPAG16
GOBP_EPITHELIAL_TO_MESENCHYMAL_TRANSITION	GOBP_EPITHELIAL_TO_MESENCHYMAL_TRANSITION	121	0.506537	1.52827	0.00139086	0.0202805	0.0163203	1832	tags=26%, list=13%, signal=23%	PHLDB2/GREM1/WNT5A/SNAI2/FERMT2/FLNA/TGFB2/HEYL/SFRP1/EPHA3/SFRP2/TGFB3/SPRY1/OLFM1/SOX9/PDPN/WWTR1/WNT4/SNAI1/PDCD4/CLASP1/IL6/HAS2/VASN/ENG/FGFR2/DAB2/HMGA2/BAMBI/HDAC2/COL1A1/FOXC1
GOBP_MYELOID_CELL_HOMEOSTASIS	GOBP_MYELOID_CELL_HOMEOSTASIS	120	0.506518	1.52768	0.00139086	0.0202805	0.0163203	3044	tags=34%, list=22%, signal=27%	ANXA1/ETS1/HIPK2/SPI1/MAFB/ADAM17/HMOX1/AXL/VEGFA/BCL2L11/PDE4B/SOD1/TMEM14C/B2M/MERTK/IL6/HSPA1B/NCAPG2/SMAP1/TMOD3/ZNF16/MAEA/KLF2/MPL/CASP3/UFL1/ZFP36L1/BCL6/ACVR1B/PRMT1/THRA/HSPA1A/ADAR/TGFBR3/FLVCR1/HIF1A/ACVR2A/KIT/GATA2/BPGM/SLC15A4
GOBP_REGULATION_OF_ACTIN_FILAMENT_BUNDLE_ASSEMBLY	GOBP_REGULATION_OF_ACTIN_FILAMENT_BUNDLE_ASSEMBLY	83	0.547711	1.59821	0.00140035	0.0203671	0.0163899	2111	tags=31%, list=15%, signal=27%	PHLDB2/FERMT2/RDX/FLNA/NRP1/ACTG1/S1PR1/PFN2/PFN1/SFRP1/LPAR1/TGFB3/ARHGEF5/NOX4/SLC9A1/WNT4/DLC1/CLASP1/SORBS3/GPR65/LIMK1/PAK1/ALMS1/ARHGAP6/MET/CDC42
GOCC_SIDE_OF_MEMBRANE	GOCC_SIDE_OF_MEMBRANE	361	0.423474	1.3144	0.00140823	0.02043	0.0164405	2747	tags=29%, list=20%, signal=24%	THBS1/CDH5/IL1R1/ANXA1/ERRFI1/PTP4A1/GNAI1/HEG1/MCAM/CD248/FERMT2/CLEC2B/MSR1/GNG11/CDH13/CCRL2/S1PR1/PTPRC/IGLL5/CD36/CLEC14A/LCK/FCGR3A/PKHD1/FGR/CD14/B4GALT1/PDGFRA/GNG7/GNAI2/CD80/STAC/IL7R/GNG4/HCK/CD40/TLR8/FAS/GEM/ICOSLG/MUC17/ENPEP/TFRC/GNAZ/GNG2/MYH9/SERPINE2/AZGP1/GNG12/GNAS/ALCAM/NT5E/B2M/PDCD1LG2/RGS2/TLR4/TRAF1/MFGE8/ANTXR1/F3/CX3CR1/ENG/ABCB1/LIFR/GNA12/PKD2/FER/PRLR/ENOX1/GNB4/CD2/…
GOBP_REGULATION_OF_BONE_MINERALIZATION	GOBP_REGULATION_OF_BONE_MINERALIZATION	54	0.578628	1.6176	0.00141976	0.0205453	0.0165334	2231	tags=30%, list=16%, signal=25%	GREM1/DDR2/SRGN/S1PR1/ECM1/TGFB3/SOX9/PKDCC/WNT4/BMPR1B/ADRB2/ANKH/COMP/MEF2C/SLC8A1/CCR1
GOMF_CARBOHYDRATE_BINDING	GOMF_CARBOHYDRATE_BINDING	148	0.491322	1.49144	0.00142531	0.0205739	0.0165564	2756	tags=33%, list=20%, signal=27%	REG4/CHI3L1/SLC2A3/CD248/GALNT1/LGALS1/PTX3/PLOD2/CLEC2B/CD93/PPP1R3C/MRC2/LGALS3/C4B/GPCPD1/PRG4/CLEC14A/PYGL/LGALS4/CLEC7A/GALNT6/H6PD/PLA2R1/LMAN1/SLC2A8/RPIA/ENPP2/ZG16B/CNTN1/LGALSL/ALDOB/ENG/GALNT7/OGFOD1/CLEC4E/SIGLEC6/LGALS9/HKDC1/GALNT5/CD34/FREM1/AGL/CD72/CLEC2D/OGFOD2/PLOD1/GALM/LY75/CLEC11A
GOBP_RESPONSE_TO_CALCIUM_ION	GOBP_RESPONSE_TO_CALCIUM_ION	91	0.53094	1.56872	0.00144875	0.0208598	0.0167865	2214	tags=31%, list=16%, signal=26%	CAV1/THBS1/WNT5A/SYT13/PTGES/DUSP1/SYT7/TRPC1/CPNE5/PRKAA1/SPARC/SUCNR1/SLC25A24/HSPA5/LGMN/ENTPD6/SYT11/GDI1/KCNMA1/KCNMB2/PKD2/CLIC4/SLC25A12/CCND1/AQP3/KCNMB1/MEF2C/SYT17
GOBP_HEART_VALVE_DEVELOPMENT	GOBP_HEART_VALVE_DEVELOPMENT	53	0.587793	1.63783	0.00146967	0.0211081	0.0169863	2933	tags=36%, list=21%, signal=28%	ROBO1/SNAI2/TGFB2/HEYL/GJA5/STRA6/OLFM1/SOX9/ADAMTS9/ELN/SNAI1/NOS3/SHOX2/MEF2C/SOX4/GATA4/NOTCH2/SLIT2/DCHS1
GOMF_G_PROTEIN_COUPLED_RECEPTOR_ACTIVITY	GOMF_G_PROTEIN_COUPLED_RECEPTOR_ACTIVITY	143	0.488321	1.47963	0.001534	0.0219771	0.0176856	2359	tags=30%, list=17%, signal=25%	PDGFRB/F2R/FZD4/CCRL2/S1PR1/F2RL2/LPAR1/LGR4/EDNRA/FZD8/FPR1/OXTR/C3AR1/SUCNR1/LGR5/FZD1/PDGFRL/PTAFR/HTR2B/GPR135/GPRC5B/PTGER2/S1PR3/CALCRL/CX3CR1/GPR65/GPR1/GPR160/ADRB2/PTGFR/CELSR1/GABBR1/GPR176/P2RY1/TAS2R30/ADORA1/APLNR/TAPT1/EDNRB/CCR1/P2RY14/AVPR1A/SMO
GOMF_PHOSPHATIDYLSERINE_BINDING	GOMF_PHOSPHATIDYLSERINE_BINDING	41	0.614827	1.67206	0.00154419	0.0220681	0.0177588	2214	tags=37%, list=16%, signal=31%	THBS1/SYT13/ASAP1/MARK1/SMPD3/SYT7/GSDMB/MME/AXL/SCARB1/MFGE8/SYT11/HSPA8/ANXA2P2/SYT17
GOMF_CALCIUM_DEPENDENT_PHOSPHOLIPID_BINDING	GOMF_CALCIUM_DEPENDENT_PHOSPHOLIPID_BINDING	31	0.644538	1.68544	0.0015498	0.0220933	0.0177791	607	tags=23%, list=4%, signal=22%	DYSF/SYT13/ANXA1/ANXA10/ANXA4/SYT7/CPNE5
GOBP_CELLULAR_RESPONSE_TO_NITROGEN_COMPOUND	GOBP_CELLULAR_RESPONSE_TO_NITROGEN_COMPOUND	471	0.40982	1.28136	0.00155549	0.0221195	0.0178002	2135	tags=23%, list=15%, signal=20%	PDE3A/CAV1/VIM/PDGFC/RAB31/RARRES2/ERRFI1/MAP1B/IGFBP5/CYBB/FLNA/COL4A1/GJA1/ZDHHC7/NR4A3/CD36/SFRP1/MMP2/SMPD3/FOXO1/PDGFRA/GNAI2/ATP6V1E1/APLP1/NR4A2/BCL2L11/PRKAA1/PDE4B/SLC39A14/TLR6/SOX9/PRKACB/SOD1/RIOK3/NOX4/SLC9A1/KLF3/HSPA5/GNG2/PRKCI/ATP7A/STC1/CPEB3/SLC2A8/PID1/RPS6KB1/PHIP/PTAFR/DTNBP1/LGMN/GNAS/RAB12/HTR2B/CEBPB/PDGFD/ATP6V0B/NCOA5/CA2/MYO5A/IFIH1/TLR4/MDM2/CRKL/IGF1R/PRKCQ/CDK5R1/AK…
GOBP_BRANCH_ELONGATION_OF_AN_EPITHELIUM	GOBP_BRANCH_ELONGATION_OF_AN_EPITHELIUM	14	0.754582	1.69166	0.0015643	0.0221898	0.0178568	1570	tags=50%, list=11%, signal=44%	WNT5A/ESR1/TNC/SPRY1/SOX9/FGF1/FGFR2
GOMF_ENDOPEPTIDASE_ACTIVITY	GOMF_ENDOPEPTIDASE_ACTIVITY	246	0.448096	1.38152	0.0015939	0.0225541	0.0181499	2503	tags=27%, list=18%, signal=22%	C1R/ADAMTS2/C1S/PRSS23/FAP/UCHL1/HTRA1/PLAU/CTSS/CTSE/ADAMTS1/SFRP1/MMP2/ADAM17/PRSS1/MMP15/MME/PCSK5/ADAMTS4/USP20/PLAT/PAPPA/BACE2/ATG4A/ADAMTS9/CASP10/ADAMTS16/LGMN/THSD4/SPG7/RHBDL2/CFB/USP36/ADAMTS7/ADAM32/ADAMTS5/HTRA3/F3/PSMD1/PSEN2/SENP6/SENP7/CASP3/MMP9/CASP7/BACE1/CAPN9/ADAM12/CAPN5/CTSD/CAPN8/AFG3L2/USP18/CASP6/PIK3IP1/ADAMTS3/ADAM8/ADAMTSL3/NRIP2/PSMB2/ACE2/USP42/USP48/PSMA2/USP35/TMP…
GOBP_SECONDARY_METABOLITE_BIOSYNTHETIC_PROCESS	GOBP_SECONDARY_METABOLITE_BIOSYNTHETIC_PROCESS	12	0.792024	1.73164	0.00160287	0.0226252	0.0182072	583	tags=25%, list=4%, signal=24%	WNT5A/ZEB2/TRPC1
GOBP_POSITIVE_REGULATION_OF_CHEMOTAXIS	GOBP_POSITIVE_REGULATION_OF_CHEMOTAXIS	102	0.520713	1.54717	0.00163142	0.0229719	0.0184861	1553	tags=25%, list=11%, signal=22%	THBS1/WNT5A/RARRES2/SCG2/SERPINE1/PDGFRB/NRP1/IL16/CDH13/S1PR1/TPBG/PRKD1/MCU/ADAM17/LPAR1/SEMA5A/VEGFA/C3AR1/VEGFC/SUCNR1/LGMN/PDGFD/IL6/F3/CAMK1D
GOBP_ACTOMYOSIN_STRUCTURE_ORGANIZATION	GOBP_ACTOMYOSIN_STRUCTURE_ORGANIZATION	147	0.486157	1.47565	0.00166416	0.0233755	0.0188109	2207	tags=27%, list=16%, signal=23%	PHLDB2/CNN3/FERMT2/MYH11/PDGFRB/FRMD6/NRP1/ACTG1/CFL2/S1PR1/PFN2/PFN1/SFRP1/LPAR1/PDGFRA/TGFB3/ARHGEF5/FHDC1/TMOD1/NOX4/ANKRD1/SLC9A1/ELN/WNT4/CSRP2/MYH9/DLC1/CLASP1/TMOD3/SORBS3/GPR65/LIMK1/PAK1/LMOD1/ALMS1/ARHGAP6/MET/FHOD3/CDC42/ARRB1
GOBP_POSITIVE_REGULATION_OF_NEURAL_PRECURSOR_CELL_PROLIFERATION	GOBP_POSITIVE_REGULATION_OF_NEURAL_PRECURSOR_CELL_PROLIFERATION	28	0.666611	1.7069	0.00168014	0.0235424	0.0189452	1511	tags=36%, list=11%, signal=32%	ZNF423/FLNA/CDON/GNAI2/NES/VEGFA/VEGFC/GLI1/NAP1L1/CX3CR1
GOBP_ACTIN_FILAMENT_ORGANIZATION	GOBP_ACTIN_FILAMENT_ORGANIZATION	327	0.434824	1.34837	0.00168435	0.023544	0.0189465	2111	tags=24%, list=15%, signal=21%	PHLDB2/FERMT2/RDX/TPM2/ADD3/PLS3/FLNA/NRP1/IQGAP2/ACTG1/CFL2/S1PR1/CDC42EP5/PFN2/PFN1/MARCKS/SFRP1/RHOBTB3/INPPL1/GAS2L1/USH1C/MCU/LPAR1/CALD1/ARPC5/TGFB3/ARHGEF5/ANG/SEMA5A/MPRIP/HCK/GAS7/FHDC1/TMOD1/MARCKSL1/RASA1/NOX4/SLC9A1/ELN/WNT4/DBN1/PRKCI/ARHGAP12/PREX1/LCP1/ARHGAP25/WASF1/ARF6/DPYSL3/DLC1/CLASP1/LIMA1/MYO5A/ABI2/TMOD3/SHROOM3/SORBS3/RGS4/GPR65/KANK4/LIMK1/VILL/PAK1/MYO1C/SSH3/LMOD1/PAWR…
GOBP_NEGATIVE_REGULATION_OF_NUCLEOCYTOPLASMIC_TRANSPORT	GOBP_NEGATIVE_REGULATION_OF_NUCLEOCYTOPLASMIC_TRANSPORT	18	0.730977	1.71905	0.00169781	0.0236746	0.0190516	840	tags=39%, list=6%, signal=37%	MDFIC/PKIG/RAB23/CD36/APOD/ANGPT1/PKIA
GOBP_GASTRULATION	GOBP_GASTRULATION	120	0.503349	1.51812	0.00170824	0.0237588	0.0191193	2976	tags=36%, list=21%, signal=28%	PHLDB2/COL4A2/WNT5A/GATA6/FN1/GJA1/DUSP1/NR4A3/SFRP1/MMP2/SFRP2/MMP15/ITGB1/LAMB1/LEO1/SNAI1/HNF4A/CLASP1/PAF1/FGFR2/DKK1/HMGA2/MMP9/COL5A1/COL6A1/FOXC1/ITGA8/HSBP1/GPC3/COL11A1/EXT2/APLNR/COL7A1/ITGA7/PRKAR1A/COL12A1/PHLDB1/MMP14/LAMA3/WNK1/FOXF1/DLD/ACVR2A
GOBP_CELL_RECOGNITION	GOBP_CELL_RECOGNITION	92	0.527495	1.56076	0.00171212	0.0237588	0.0191193	1456	tags=25%, list=10%, signal=23%	ROBO1/PECAM1/PTX3/NDN/PALLD/EPHB3/LGALS3/IGLL5/PCDHB6/CD36/C4B/EPHA3/B4GALT1/SEMA5A/CLEC7A/TCP1/MSN/NCAM2/SCARB1/ADAM32/CNTN4/MFGE8/CDK5R1
GOCC_EXCITATORY_SYNAPSE	GOCC_EXCITATORY_SYNAPSE	25	0.672371	1.66713	0.00171754	0.0237766	0.0191337	1570	tags=36%, list=11%, signal=32%	SLC16A3/PALLD/ELFN1/PDE4B/GRIA3/PLCB4/SRPX2/SYT11/FGFR2
GOBP_REGULATION_OF_ACTOMYOSIN_STRUCTURE_ORGANIZATION	GOBP_REGULATION_OF_ACTOMYOSIN_STRUCTURE_ORGANIZATION	78	0.543329	1.57685	0.00174148	0.02405	0.0193537	2111	tags=31%, list=15%, signal=26%	PHLDB2/FERMT2/NRP1/ACTG1/S1PR1/PFN2/PFN1/SFRP1/LPAR1/TGFB3/ARHGEF5/NOX4/SLC9A1/WNT4/DLC1/CLASP1/SORBS3/GPR65/LIMK1/PAK1/ALMS1/ARHGAP6/MET/CDC42
GOBP_HEART_PROCESS	GOBP_HEART_PROCESS	170	0.478839	1.46411	0.00175006	0.0241105	0.0194024	3476	tags=42%, list=25%, signal=32%	CAV1/BVES/GJC1/KCNE3/ADM/ABCC9/FLNA/TGFB2/KCND2/GJA1/CYP2J2/GJA5/GNAI2/TRPC1/CACNA1H/PDE4B/SGCD/MAP2K6/WWTR1/SOD1/FXYD6/NOX4/ATP1B1/SLC9A1/STC1/ANK2/CELF2/YWHAE/RGS2/AKAP9/RGS4/CLIC2/KCNJ8/RNF207/ITPR2/KCND1/PIK3CA/ADORA1/CDC42/EXT2/SLC8A1/GPX1/AVPR1A/SEMA3A/GSTM2/THRA/GATA4/ACE2/BIN1/ASB3/ATG5/HBEGF/KCNJ2/AGT/SCN4B/KCNK1/TMEM65/KCND3/CXADR/DMPK/NOS1AP/RYR3/ATP1B3/SCN3B/GNAO1/RAMP3/NEDD4L/SMAD7/C…
GOBP_FIBROBLAST_PROLIFERATION	GOBP_FIBROBLAST_PROLIFERATION	66	0.550922	1.58203	0.00175445	0.0241131	0.0194045	1995	tags=26%, list=14%, signal=22%	PDGFC/WNT5A/DDR2/FN1/PDGFRB/NUPR1/ESR1/SFRP1/PDGFRA/NLRC3/FTH1/PDGFD/EREG/PAWR/CREB1/PARP10/MYB
GOBP_PROTEIN_ACTIVATION_CASCADE	GOBP_PROTEIN_ACTIVATION_CASCADE	12	0.790423	1.72813	0.00177956	0.0243876	0.0196254	2071	tags=58%, list=15%, signal=50%	FN1/VWF/A2M/PRCP/F3/F8/SERPING1
GOBP_ODONTOGENESIS	GOBP_ODONTOGENESIS	81	0.53629	1.56419	0.00178291	0.0243876	0.0196254	2671	tags=37%, list=19%, signal=30%	SERPINE1/HTRA1/ADM/TGFB2/FAM20A/ASPN/SMPD3/TNC/FOXO1/PDGFRA/TGFB3/BCL2L11/FST/LAMB1/HDAC1/CA2/ADAMTS5/FGFR2/COL1A2/HDAC2/COL1A1/FOXC1/AQP3/CSF3R/FAM20C/CD34/SMO/ID3/TP63/TNFRSF11B
GOBP_POSITIVE_REGULATION_OF_VASOCONSTRICTION	GOBP_POSITIVE_REGULATION_OF_VASOCONSTRICTION	15	0.735513	1.67278	0.00179148	0.0244339	0.0196626	1589	tags=47%, list=11%, signal=41%	CAV1/F2R/GJA1/GJA5/OXTR/PTAFR/CD38
GOCC_APICAL_PLASMA_MEMBRANE	GOCC_APICAL_PLASMA_MEMBRANE	214	0.45817	1.40794	0.00179479	0.0244339	0.0196626	2888	tags=33%, list=21%, signal=26%	DDR2/ANXA1/FN1/RDX/SLC16A3/CDH2/PDGFRB/SLC12A2/OCLN/MPDZ/GJA1/SLC30A5/F2RL2/CD36/ADAM17/PKHD1/SLC6A20/SLC34A2/SLC15A2/ATP6V1E1/PRKAA1/SLC39A14/MSN/OXTR/LZTS1/PDPN/MUC17/ENPEP/NOX4/ATP1B1/SLC9A1/PRKCI/ATP7A/STC1/ANK2/GNAS/PODXL/SLC4A2/SLC9B2/SHROOM3/SLC16A1/PSEN2/KCNMA1/ABCB1/BST2/SCNN1A/ERBB3/ADRB2/SLC5A1/AKR1A1/CLDN1/HSP90AB1/MARVELD2/P2RY1/SLC26A9/NAALADL1/SLC44A4/CD34/SLC3A2/ACE2/SLC2A9/SLC4A7…
GOBP_METANEPHRIC_NEPHRON_DEVELOPMENT	GOBP_METANEPHRIC_NEPHRON_DEVELOPMENT	24	0.67218	1.66027	0.00180186	0.0244721	0.0196934	2359	tags=54%, list=17%, signal=45%	GREM1/PDGFRB/LGR4/PDGFRA/LAMB2/SOX9/WNT4/LIF/PKD2/HES1/WT1/CD34/SMO
GOBP_BLASTODERM_SEGMENTATION	GOBP_BLASTODERM_SEGMENTATION	12	0.789385	1.72587	0.00183004	0.0247962	0.0199542	2308	tags=67%, list=17%, signal=56%	WNT5A/BASP1/NRP2/SEMA3F/HOXD8/WDR77/WT1/SEMA3A
[truncated: 929 more rows]

## Sheet: Epi_KEGG
ID	Description	setSize	enrichmentScore	NES	pvalue	p.adjust	qvalues	rank	leading_edge	core_enrichment
[truncated: 39 more rows]

[truncated: 4 more sheets: Epi_Hallmark, Stroma_GO, Stroma_KEGG, Stroma_Hallmark]
